# Supplementary material for: MetaboKit: a comprehensive data extraction tool for untargeted metabolomics
Source: Royal Society of Chemistry journal article supplement (doi:10.1039/d0mo00030b), 2020-06-10
Supplement: d0mo00030b1.pdf [file d0mo00030b1.pdf]

**Supplementary Information for “MetaboKit: a comprehensive data  
extraction tool for untargeted metabolomics”**

Pradeep Narayanaswamy<sup>1,\*</sup>, Guoshou Teo<sup>2,\*</sup>, Jin Rong Ow<sup>3</sup>, Adam Lau<sup>4</sup>, Philipp Kaldis<sup>3,5</sup>, Stephen Tate<sup>4</sup>,  
Hyungwon Choi<sup>2,3,#</sup>

**Affiliations**

1. Sciex, R&D, Singapore

2. Department of Medicine, Yong Loo Lin School of Medicine, National University of Singapore, Singapore

3. Institute of Molecular and Cell Biology, A\*STAR, Singapore

4. Sciex, Concord, Canada

5. Department of Clinical Sciences, Lund University, Sweden

\*These authors contributed equally to this work.

#e-mail: [hyung\\_won\\_choi@nus.edu.sg](mailto:hyung_won_choi@nus.edu.sg)

18 **Supplementary Table 1.**

19 List of 86 metabolite standards (out of 91) with annotation from single compound injection analyses. For  
20 identification results in MS-DIAL and XCMSOnline, we included identifications without MS/MS matching  
21 for both parent ions and ISFs.

22

23 **Supplementary Table 2.**

24 Evaluation of sensitivity of compound identification from DDA analysis of 91 metabolite standard mixture  
25 (positive and negative ion modes). The table also includes the original identification reports from all  
26 software packages in comparison. XCMSOnline did not return any output for the negative mode analysis.

27

28 **Supplementary Table 3.**

29 DDA analysis output files for mouse liver samples. Each sample was analyzed four times: two extraction  
30 methods (aqueous fraction and organic fraction) in positive and negative ion modes. As such, there are  
31 four files for each software package.

32

33 **Supplementary Table 4.**

34 DIA analysis output files for the metabolite standard mix in a series of spike-in concentrations (positive  
35 and negative ion modes). The tabs with the suffix “\_Quality” contains average abundance values and  
36 concentration-specific coefficients of variation. For MS2-level quantification, we applied the mapDIA  
37 software to derive a single value for each compound from its multiple product ions.

38

39 **Supplementary Table 5.**

40 DIA analysis output files for mouse liver samples (aqueous and organic fractions in positive and negative  
41 ion modes). For MS2-level quantification, we applied the mapDIA software to derive a single value for  
42 each compound from its multiple product ions. The tabs with the suffix “\_mapDIA” contains differential  
43 metabolite abundance analysis from the mapDIA software.

44

45

46

47

48

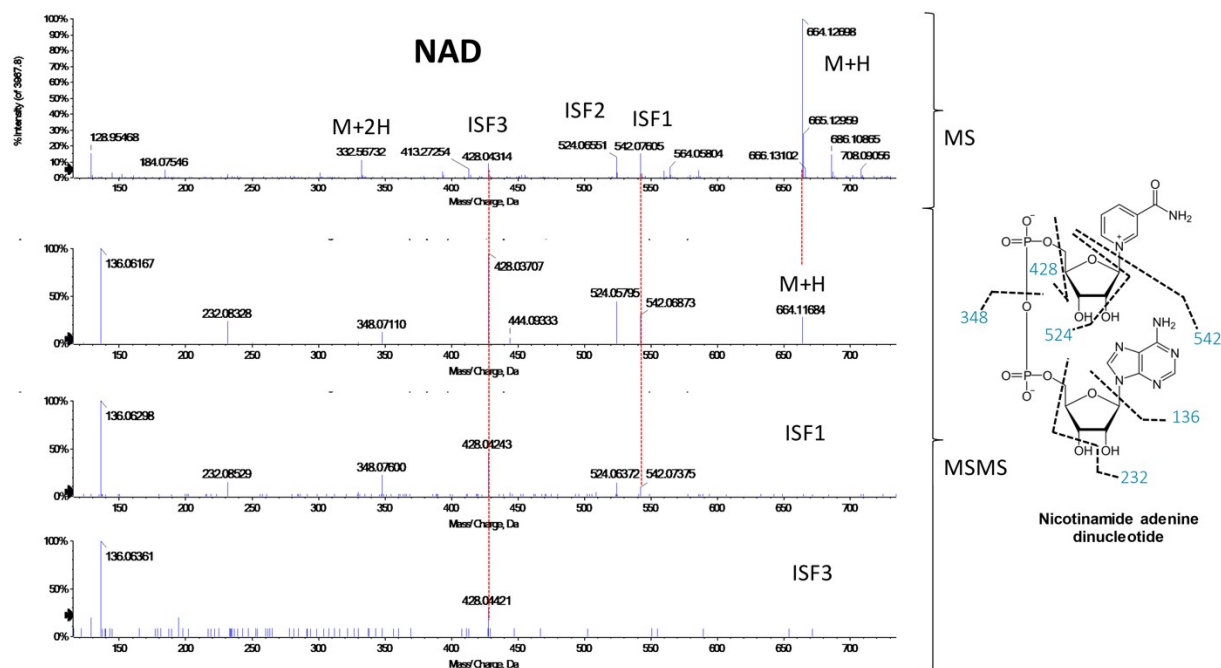

49

50 **Supplementary Figure 1** | Comparison MS/MS spectra of NAD and its in-source fragments. The red dotted  
 51 line marks the  $m/z$  of the ISF ions in the full scan where NAD was detected. All product ions of the parent  
 52 ion  $[M+H]$  and two ISFs were aligned along the  $m/z$  axis.

53

54

55

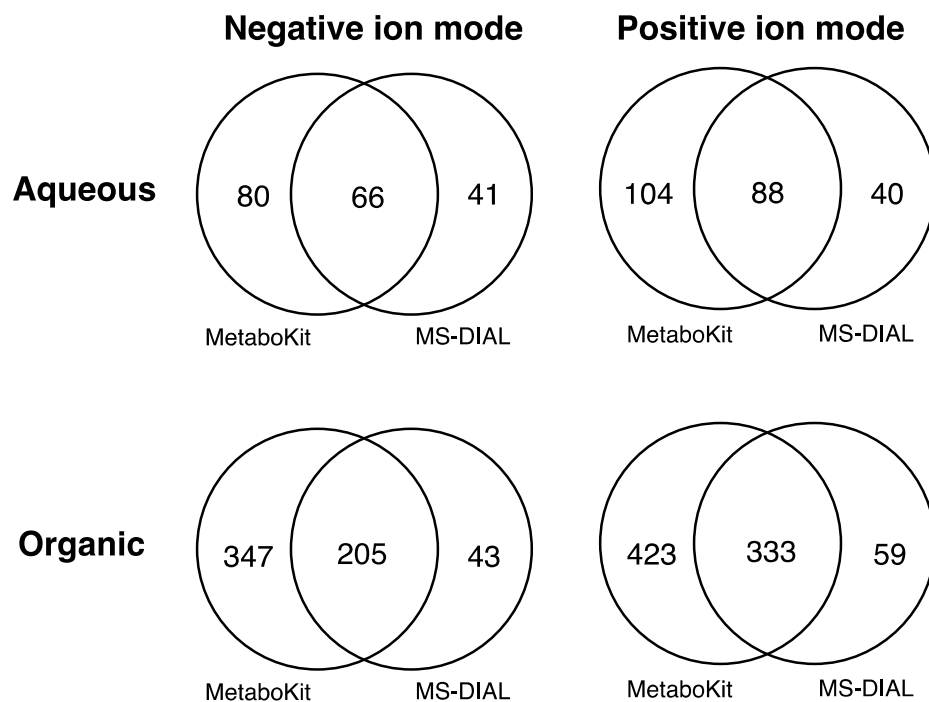

56

57 **Supplementary Figure 2 |** Comparison of the metabolite identifications (per peak, with overlap in  
 58 compound names from different fractions and ionization modes) in the DDA analysis between MetaboKit  
 59 and MS-DIAL. The intersection of each Venn diagram was strictly limited to the exact same compound  
 60 names only. Compound identifications without MS/MS evidence from MS-DIAL were excluded in the  
 61 comparison.

62

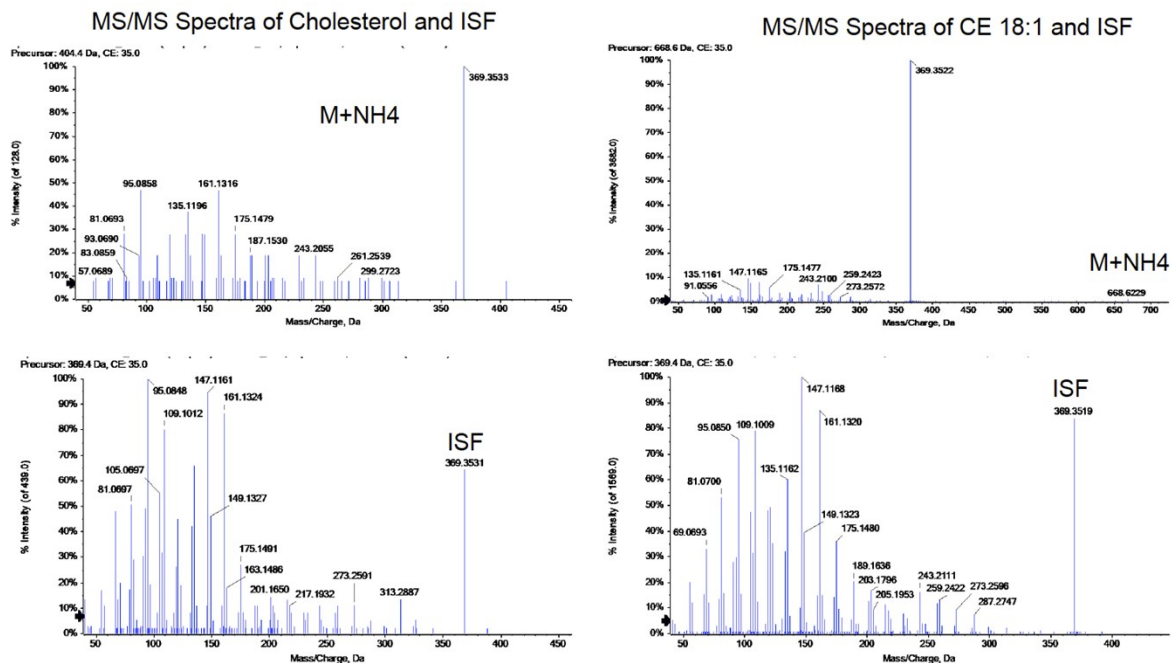

63  
64

65 **Supplementary Figure 3 |** Comparison of cholesterol and its ISF with water loss (left), and CE 18:1 and its  
 66 ISF (right) in terms of MS/MS fragmentation. Top panel and bottom panels are product ion spectra of the  
 67 parent compound and the corresponding ISF.
