# Supplementary material for: MetaboKit: a comprehensive data extraction tool for untargeted metabolomics
Source: Royal Society of Chemistry journal article supplement (doi:10.1039/d0mo00030b), 2020-06-10
Supplement: d0mo00030b2.xlsx [file d0mo00030b2.xlsx]

## Sheet: Legend
Supplementary Table 1
86 (of 91) standard mix with single compound injection analyses. For both identifications and ISF calls, we included those records without MS/MS matching in MS-DIAL and XCMSonline.
Field Name	Section	Description
PRIMARY_NAME	Meta Information	Metabolite names
NEUTRAL MONOISOTOPIC MOLECULAR MASS		Monoisotopic mass of compound without adducts
METLIN_ID		METLIN database identifier for compounds
ISF1+	True ISF events	m/z of manually verified first ISF from single compound injection, positive ion mode
ISF2+		m/z of manually verified second ISF from single compound injection, positive ion mode
ISF3+		m/z of manually verified third ISF from single compound injection, positive ion mode
ISF1-		m/z of manually verified first ISF from single compound injection, negative ion mode
ISF2-		m/z of manually verified second ISF from single compound injection, negative ion mode
ISF3-		m/z of manually verified third ISF from single compound injection, negative ion mode
MetaboKit+, parent ion	MetaboKit positive ion mode	Detection of the parent compound from the mixture, positive ion mode, by MetaboKit
MetaboKit+, ISF1		Detection of the first ISF from the mixture, positive ion mode, by MetaboKit
MetaboKit+, ISF2		Detection of the second ISF from the mixture, positive ion mode, by MetaboKit
MetaboKit+, ISF3		Detection of the first ISF from the mixture, positive ion mode, by MetaboKit
MSDIAL+, parent ion	MS-DIAL positive ion mode	Detection of the parent ion from the mixture, positive ion mode, by MS-DIAL
MSDIAL+, ISF1, noID assigned & warning		Detection of the first ISF from the mixture with no ID assigned and warning for larger compound, positive ion mode, by MS-DIAL
MSDIAL+, ISF2, noID assigned & warning		Detection of the second ISF from the mixture with no ID assigned and warning for larger compound, positive ion mode, by MS-DIAL
MSDIAL+, ISF3, noID assigned & warning		Detection of the third ISF from the mixture with no ID assigned and warning for larger compound, positive ion mode, by MS-DIAL
XCMSonline+, parent ion	XCMSonline positive ion mode	Detection of the parent ion from the mixture, positive ion mode, by XCMSonline
XCMSonline+, ISF1, noID in a peak group		Detection of the first ISF from the mixture with no ID assigned in a peak group, positive ion mode, by XCMSonline
XCMSonline+, ISF2, noID in a peak group		Detection of the second ISF from the mixture with no ID assigned in a peak group, positive ion mode, by XCMSonline
XCMSonline+, ISF3, noID in a peak group		Detection of the third ISF from the mixture with no ID assigned in a peak group, positive ion mode, by XCMSonline
MetaboKit-, parent ion	MetaboKit negative ion mode	Detection of the parent compound from the mixture, negative ion mode, by MetaboKit
MetaboKit-, ISF1		Detection of the first ISF from the mixture, negative ion mode, by MetaboKit
MetaboKit-, ISF2		Detection of the second ISF from the mixture, negative ion mode, by MetaboKit
MetaboKit-, ISF3		Detection of the first ISF from the mixture, negative ion mode, by MetaboKit
MSDIAL-, parent ion	MS-DIAL negative ion mode	Detection of the parent ion from the mixture, negative ion mode, by MS-DIAL
MSDIAL-, ISF1, noID assigned & warning		Detection of the first ISF from the mixture with no ID assigned and warning for larger compound, negative ion mode, by MS-DIAL
MSDIAL-, ISF2, noID assigned & warning		Detection of the second ISF from the mixture with no ID assigned and warning for larger compound, negative ion mode, by MS-DIAL
MSDIAL-, ISF3, noID assigned & warning		Detection of the third ISF from the mixture with no ID assigned and warning for larger compound, negative ion mode, by MS-DIAL

## Sheet: ISF
Order	PRIMARY_NAME	MOLECULAR_FORMULA	NEUTRAL MONOISOTOPIC MOLECULAR MASS	METLIN_ID	CHEBI	M+H	M+Na	M+NH4	M+K	Dimers	M+Li	M-H	[M+HCOO]-	[M-H+Na]	[M-H+Cl]	Dimer	ISF1+	ISF2+	ISF3+	ISF1-	ISF2-	ISF3-	MetaboKit+, Parent ion	MetaboKit+, ISF1	MetaboKit+, ISF2	MetaboKit+, ISF3	MSDIAL+, Parent ion	MSDIAL+, ISF1, noID assigned & warning	MSDIAL+, ISF2, noID assigned & warning	MSDIAL+, ISF3, noID assigned & warning	XCMSonline+, Parent ion	XCMSonline+, ISF1, noID in a peak group	XCMSonline+, ISF2, noID in a peak group	XCMSonline+, ISF3, noID in a peak group	MetaboKit-, Parent ion	MetaboKit-, ISF1	MetaboKit-, ISF2	MetaboKit-, ISF3	MSDIAL-, Parent ion	MSDIAL-, ISF1, noID assigned & warning	MSDIAL-, ISF2, noID assigned & warning	MSDIAL-, ISF3, noID assigned & warning
6	PURINE	C5H4N4	120.044	6193	17258	121.05						119.036					94.0387			92.0251	65.0143		*				*								*				*
12	ASPARTATE	C4H7NO4	133.038	15	17364	134.043	156.023		171.999			132.03					116.033			115.004	88.0401		*												*				*	*
14	ADENINE	C5H5N5	135.054	85	16708	136.061						134.047					119.034			107.036			*	*			*	*							*				*	*
15	HYPOXANTHINE	C5H4N4O	136.039	83	17368	137.045	159.027		175.001			135.031					119.034	110.034		92.025			*	*			*	*			*	*	*		*	*			*	*
21	XANTHINE	C5H4N4O2	152.033	82	17712	153.04	175.02		190.995			151.026					136.013	110.034		108.02			*				*				*		*		*
22	HISTIDINE	C6H9N3O2	155.069	21	15971	156.076	178.058					154.062		176.044			110.071	93.0439	83.0596	93.0455			*	*			*	*			*	*	*	*	*				*
24	PHENYLALANINE	C9H11NO2	165.079	28	17295	166.086	188.066		204.039			164.071					120.08	103.053		147.045			*	*	*		*				*	*	*		*				*	*
29	ARGININE	C6H14N4O2	174.112	13	16467	175.119						173.104					158.092	130.097	116.07	131.082			*				*			*	*	*	*	*	*				*
34	THEOPHYLLINE	C7H8N4O2	180.065	1458	28177	181.072	203.053		219.027	383.117		179.058					137.081	124.05		164.034	122.036		*				*		*		*		*		*				*	*	*
35	TYROSINE	C9H11NO3	181.074	34	17895	182.081	204.063		220.035			180.067					165.054	136.075	123.043	163.04	119.05		*	*	*	*	*				*		*	*	*				*	*
45	PANTOTHENATE	C9H17NO5	219.111	241	7916	220.118	242.1		258.074	461.211	226.126	218.104					202.107	184.096	90.0541	146.082	88.0405		*	*	*		*	*	*	*	*		*	*	*				*	*
47	CARNOSINE	C9H14N4O3	226.107	38	15727	227.113	249.095		265.069			225.099					210.086	156.076	110.07				*				*			*	*			*	*
49	MELATONIN	C13H16N2O2	232.121	73	16796	233.128	255.11			465.25		231.114					216.101	174.091	159.067	216.091	144.046		*		*	*	*			*	*			*	*	*			*	*
50	ANSERINE	C10H16N4O3	240.122	4195	18323	241.13	263.112					239.115					197.139	170.091	126.102				*								*				*				*
51	THYMIDINE	C10H14N2O5	242.09	3375	17748	243.097	265.079			485.187	249.105	241.083	287.087		277.059		127.049			125.035			*	*			*				*	*			*				*
52	CYTIDINE	C9H13N3O5	243.086	3376	17562	244.092				487.176		242.078					112.049						*	*			*	*			*	*			*				*
53	URIDINE	C9H12N2O6	244.07	90	16704	245.077	267.059		283.032		251.084	243.062	289.066		279.039		113.034	96.0074		200.056	111.02		*	*			*		*		*	*	*		*				*	*
54	BIOTIN	C10H16N2O3S	244.088	243	15956	245.095	267.077		283.052	489.183		243.081		265.063			227.084			200.075			*	*			*	*			*				*				*	*
55	GLUCOSE 6-PHOSPHATE	C6H13O9P	260.03		4170	261.037	283.019					259.023					243.026	127.038		96.9694	78.959		*		*		*		*						*				*	*	*
59	ADENOSINE	C10H13N5O4	267.097	86	16335	268.104						266.089	312.094				136.061			134.047			*	*			*	*			*				*	*			*
60	INOSINE	C10H12N4O5	268.081	84	17596	269.089	291.07		307.044	313.125		267.074					137.045			135.031			*	*			*	*			*				*	*			*	*
62	1-METHYLADENOSINE	C11H15N5O4	281.112	6888	16020	282.12					288.13	280.105	326.11	302.087	316.082		150.077			148.063			*	*			*				*				*				*
63	GUANOSINE	C10H13N5O5	283.092	87	16750	284.1	306.082		322.055	567.192		282.085		304.067	318.062	565.176	152.057	135.03		150.042			*	*			*		*		*				*				*	*
64	OPHTHALMATE	C11H19N3O6	289.127	58300	84058	290.135	312.116					288.12		310.102			215.102	161.091		270.109			*						*		*				*				*	*
65	METHYLTHIOADENOSINE	C11H15N5O3S	297.09	3425	17509	298.097						296.082	342.087				136.061			134.047			*	*			*				*				*	*			*	*
67	CYTIDINE 2',3'-CYCLIC PHOSPHATE	C9H12N3O7P	305.041	3437		306.048	328.03					304.034		326.016			112.05						*				*	*			*				*				*
68	THYMIDINE-MONOPHOSPHATE	C10H15N2O8P	322.057	3451	17013	323.063	345.045					321.049		343.031									*				*								*				*
69	URIDINE MONOPHOSPHATE	C9H13N2O9P	324.036	3453	16695	325.043	347.025					323.028					97.0275						*				*	*			*	*			*				*
70	CYCLIC AMP	C10H12N5O6P	329.053	92	17489	330.06	352.041					328.045		350.027									*				*				*				*				*
71	SUCROSE	C12H22O11	342.116	137	17992	343.124	365.106	360.15	381.079		349.132	341.109	387.115	363.09	377.086		325.113						*												*				*
72	LAUROYLCARNITINE	C19H37NO4	343.272	34490		344.28	366.261					342.265	388.27							199.17	144.103		*				*				*				*
74	ADENOSINE-MONOPHOSPHATE	C10H14N5O7P	347.063	34478	16027	348.07						346.055					136.061						*				*				*	*			*				*
75	CORTISONE	C21H28O5	360.194	271	16962	361.2	383.182		399.155			359.186	405.191		395.163					329.175			*				*				*				*				*
76	CORTISOL	C21H30O5	362.209	272	17650	363.217	385.198		401.172			361.201	407.207		397.178		345.206	327.196		331.191	329.175		*	*	*		*	*	*		*				*	*			*	*	*
77	GUANOSINE MONOPHOSPHATE	C10H14N5O8P	363.058	98	17345	364.065	386.047					362.05		384.031			152.056						*				*	*			*				*				*
78	RIBOFLAVIN	C17H20N4O6	376.138	233	17015	377.146	399.127		415.101			375.131	421.136		411.107		388.254	371.228		255.089			*				*		*		*				*	*			*	*
79	S-ADENOSYLHOMOCYSTEINE	C14H20N6O5S	384.122	296	16680	385.129						383.114		405.093			250.074	136.061	134.026				*		*		*		*		*			*	*				*
80	ADENOSINE 5'-DIPHOSPHATE	C10H15N5O10P2	427.029	34522	16761	428.037						426.021					348.07						*				*								*
81	CITICOLINE	C14H26N4O11P2	488.107	3581	16436	489.114	511.095					487.1	533.106				378.071	264.04	184.073	428.026			*				*	*			*				*				*	*
82	ADENOSINE DIPHOSPHATE RIBOSE	C15H23N5O14P2	559.072	3595	16960	560.078	582.06					558.063		580.046									*				*				*				*				*
83	URIDINE DIPHOSPHATE GLUCOSE	C15H24N2O17P2	566.055	3598	18066	567.062	589.043	584.088				565.047		587.029			405.009			96.9601			*				*				*				*				*	*
85	URIDINE DIPHOSPHATE-N-ACETYLGLUCOSAMINE	C17H27N3O17P2	607.082	41549	16264	608.089	630.069					606.074		628.054			204.086						*								*				*				*
86	BETA-NICOTINAMIDE ADENINE DINUCLEOTIDE	C21H27N7O14P2	663.109	101	15846	664.116	686.098		702.067			662.103					542.068	524.068	428.036	540.054			*	*	*	*	*		*		*		*		*	*			*
2	CHOLINE	C5H14NO	104.108	56	15354	104.106											60.0804	58.0646					*				*	*	*
4	HISTAMINE	C5H9N3	111.08	68	18295	112.086											95.0595	83.0593	68.0486				*	*			*
7	NICOTINAMIDE	C6H6N2O	122.048	1497	17154	123.055											96.0435	80.0488					*		*		*		*		*	*	*
9	CREATINE	C4H9N3O2	131.069	7	16919	132.076			170.032			130.062					114.066	90.0543	44.0492				*				*		*
10	ISOLEUCINE	C6H13NO2	131.095	5193	17191	132.101						130.087					86.0958						*				*												*
18	ACETYLCHOLINE	C7H16NO2	146.118	57	15355	146.117											87.0429						*	*			*
20	METHIONINE	C5H11NO2S	149.051	5664	16643	150.058						148.044					133.031	104.052					*	*	*		*		*										*
23	TRYPTAMINE	C10H12N2	160.1	325	16765	161.106						159.093					144.08	117.068	115.053				*	*	*		*		*	*
30	SEROTONIN	C10H12N2O	176.095	74	28790	177.101						175.087					160.075						*	*			*
36	PHOSPHORYLCHOLINE	C5H14NO4P	183.066	3318	18132	184.073											124.999	86.0958					*				*				*
40	CAFFEINE	C8H10N4O2	194.08	1455	27732	195.087											138.065						*				*	*			*	*
42	O-ACETYLCARNITINE	C9H17NO4	203.116	956	57589	204.123											145.049	144.101	85.0278				*				*	*		*	*		*	*
44	KYNURENINE	C10H12N2O3	208.085	72	16946	209.091						207.078					192.065	146.059	136.075	190.051	146.06	144.045	*	*			*				*		*
66	SPHINGANINE	C18H39NO2	301.298	395	16566	302.305	324.287																*				*
73	CORTICOSTERONE	C21H30O4	346.214	6314	16827	347.222	369.203		385.177			345.207	391.212		381.183		329.211						*	*			*	*			*
3	SERINE	C3H7NO3	105.043	5203	17115	106.049	128.03		144.004			104.035																							*				*
5	THREONINE	C4H9NO3	119.058	32	16857	120.064	142.045					118.051					102.054	56.0487																	*				*
11	ASPARAGINE	C4H8N2O3	132.053	14	17196	133.06	155.042					131.046					116.033														*	*			*
16	GLUTAMINE	C5H10N2O3	146.069	18	18050	147.076	169.058		185.031			145.062					130.049	84.0436									*				*	*	*		*				*
19	GLUTAMATE	C5H9NO4	147.053	5174	16015	148.059						146.046					130.049	84.0432		128.035	102.057						*								*				*
31	METHIONINE SULFOXIMINE	C5H12N2O3S	180.057	65992	28490	181.064	203.046					179.049					102.054																		*
41	N,N-DIMETHYLARGININE	C8H18N4O2	202.143	6891	17929	203.15						201.136					158.128	116.07									*		*		*	*	*		*				*
43	TRYPTOPHAN	C11H12N2O2	204.09	33	16828	205.097						203.082					188.07	146.059		116.05									*						*				*
46	5-HYDROXYTRYPTOPHAN	C11H12N2O3	220.085	65553	28171	221.091						219.077		241.058			204.065	162.054	146.059	144.045	132.045						*		*						*				*
48	D-RIBOSE 5-PHOSPHATE	C5H11O8P	230.019	159	17797							229.012																							*
61	6-PHOSPHOGLUCONATE	C6H13O10P	276.025	367	48928	277.031	299.014					275.017					259.021			96.9613															*				*	*
84	URIDINE DIPHOSPHATE GLUCURONIC ACID	C15H22N2O18P2	580.034	5884	17200	581.041	603.022	598.068				579.026		601.007			405.009			402.994											*				*				*
1	L-ALANINE	C3H7NO2	89.0477	11	16977	90.0541						88.0403					44.0495										*
8	TRANS-4-HYDROXY-L-PROLINE	C5H9NO3	131.058	257	18095	132.065	154.047					130.051					86.0591	68.0488
13	HOMOCYSTEINE	C4H9NO2S	135.035	63636	17230	136.042						134.028					118.031	90.0363	56.0489
17	LYSINE	C6H14N2O2	146.106	25	18019	147.111						145.098					130.085	84.0799
25	PHOSPHOENOLPYRUVATE	C3H5O6P	167.982	152	44897							166.98
26	PHOSPHOENOLPYRUVATE	C3H5O6P	167.982	152	18021							166.98
27	GLYCERALDEHYDE 3-PHOSPHATE	C3H7O6P	169.998	149	17138							243.064		265.045						78.9588
28	GLYCEROL 3-PHOSPHATE	C3H9O6P	172.014	5161	15978							171.006
32	ALPHA-D-GLUCOSE	C6H12O6	180.063	133	17925		203.052	198.097	219.026	383.116	187.078	179.056					365.105	180.086
33	SORBOSE	C6H12O6	180.063	3317	48649		203.052	198.096			187.077	179.056					365.106	180.086
37	EPINEPHRINE	C9H13NO3	183.09	62	28918	184.096						182.082					166.086	151.062	148.075	164.071
38	2-PHOSPHOGLYCERATE	C3H7O7P	185.993		24344							184.986																			*
39	3-PHOSPHOGLYCERATE	C3H7O7P	185.993		17050	187						184.986																											*
56	FRUCTOSE 6-PHOSPHATE	C6H13O9P	260.03	146	15946	261.037	283.019					259.022																			*
57	GLUCOSE 1-PHOSPHATE	C6H13O9P	260.03	379	29042	261.037						259.023								96.9602
58	GLUCOSE 6-PHOSPHATE	C6H13O9P	260.03	145	4170	261.036	283.019					259.022					243.026			96.9598
