# Supplementary material for: MetaboKit: a comprehensive data extraction tool for untargeted metabolomics
Source: Royal Society of Chemistry journal article supplement (doi:10.1039/d0mo00030b), 2020-06-10
Supplement: d0mo00030b3.xlsx [file d0mo00030b3.xlsx]

## Sheet: Legend
Supplementary Table 2
Evaluation of identification accuracy from DDA analysis of 91 standard mixture
MetaboliteSTDMix_identification	Evaluation chart of 91 metabolite standards
MetaboKit-negative	MetaboKit DDA module analysis of DDA data from negative ion mode scans
MetaboKit-positive	MetaboKit DDA module analysis of DDA data from positive ion mode scans
MSDIAL-negative	MSDIAL analysis of DDA data from negative ion mode scans
MSDIAL-positive	MSDIAL analysis of DDA data from positive ion mode scans
XCMS_METLIN-positive	XCMS Online analysis of DDA data from positive ion mode scans
Notes
0. Software in comparison: MetaboKit, MS-DIAL, and XCMSonline
1. For the evaluation chart (second tab), if an identification in MS-DIAL is reported without MS2 evidence, then we marked it as "1". Otherwise we marked it as "2".

## Sheet: MetaboliteSTDMix_identification
Order	PRIMARY_NAME	MOLECULAR_FORMULA	NEUTRAL MONOISOTOPIC MOLECULAR MASS	SIGMA-ALDRICH_NAME	TrueRT	Pos	Neg	Expected Degradation products	CompoundGroups	Isomers	MetaboKit_RT	MetaboKit_pos_RT (minutes)	MetaboKit_pos_RT (sectonds)	MetaboKit_neg_RT (minutes)	MetaboKit_neg_RT (seconds)	MS-DIAL_RT	MS-DIAL-pos_RT	MS-DIAL-pos ms-level	MS-DIAL_neg_RT	MS-DIAL-neg ms-level	METLIN_pos_RT	Remark
1	URIDINE DIPHOSPHATE GLUCURONIC ACID	C15H22N2O18P2	580.034	Uridine 5'-diphosphoglucuronic acid trisodium salt	0.91	Not detected			81		0.91			0.91	54.7	0.909			0.909	2	0.917883
2	GLUCOSE 6-PHOSPHATE	C6H13O9P	260.03	D-Glucose 6-phosphate sodium salt	0.94				54	*	0.94	0.94	56.5	0.94	56.1	0.941	0.941	2	0.948	2
3	6-PHOSPHOGLUCONATE	C6H13O10P	276.025	6-Phosphogluconic acid trisodium salt	0.93				57		0.96			0.96	57.5	0.932			0.932	1
4	URIDINE DIPHOSPHATE-N-ACETYLGLUCOSAMINE	C17H27N3O17P2	607.082	Uridine 5'-diphospho-N-acetylglucosamine sodium salt	0.96				82		0.96	0.96	57.8	0.96	57.5	0.956			0.956	2	0.963933
5	URIDINE DIPHOSPHATE GLUCOSE	C15H24N2O17P2	566.055	Uridine 5'-diphosphoglucose disodium salt hydrate from Saccharomyces cerevisiae	0.96				80		0.96	0.97	57.9	0.96	57.5	0.956	0.941	1	0.956	2	0.963933
6	GLUTAMATE	C5H9NO4	147.053	L-Glutamic acid	0.94		Low Signal		22		0.96			0.96	57.3	0.956	0.964	1	0.956	2
7	ASPARTATE	C4H7NO4	133.038	L-Aspartic acid	0.95				15		0.96	0.92	57.6	0.96	57.5	0.956			0.956	2
8	CITICOLINE	C14H26N4O11P2	488.107	Cytidine 5'-diphosphocholine sodium salt dihydrate	0.97		Not detected		78		0.98	0.99	59.2	0.98	59	0.98	0.988	2	0.98	1	0.987267
9	GLUTAMINE	C5H10N2O3	146.069	L-Glutamine	0.96				19		0.98			0.98	59	0.964	0.964	1	0.98	2	0.987267
10	SERINE	C3H7NO3	105.043	L-Serine	0.96				5		0.98			0.98	59	0.98			0.98	2
11	ASPARAGINE	C4H8N2O3	132.053	L-Asparagine	0.95				14		0.98			0.98	59						0.963933
12	METHIONINE SULFOXIMINE	C5H12N2O3S	180.057	L-Methionine sulfoximine	0.97				32		0.98			0.98	59
13	ARGININE	C6H14N4O2	174.112	L-Arginine monohydrochloride	0.99				30		1	1.01	60.6	1	60.2	0.996	0.995	2	1.005	2	1.01043
14	URIDINE MONOPHOSPHATE	C9H13N2O9P	324.036	Uridine 5'-monophosphate	0.97				65		1.01	1.01	60.6	1.01	60.4	1.005	1.011	2	1.005	2	1.01043
15	HISTIDINE	C6H9N3O2	155.069	L-Histidine monohydrochloride monohydrate	1.05				25		1.06	1.06	63.5	1.03	61.8	1.049	1.049	2	1.028	2	1.0566
16	CARNOSINE	C9H14N4O3	226.107	L-Carnosine	1.03				46		1.03	1.03	62	1.03	61.8	1.034	1.034	2			1.0336
17	SUCROSE	C12H22O11	342.116	Sucrose	1.06				68		1.08	1.08	64.8	1.08	64.7	10.67			1.067	2
18	ADENOSINE DIPHOSPHATE RIBOSE	C15H23N5O14P2	559.072	Adenosine 5'-diphosphoribose sodium salt	1.07				79		1.08	1.08	64.8	1.08	64.7	1.075	1.08	2	1.075	2	1.10274
19	ANSERINE	C10H16N4O3	240.122	L-Anserine nitrate salt	1.08				49		1.08	1.08	64.8	1.08	64.7	1.075			1.075	2	1.10277
20	OPHTHALMATE	C11H19N3O6	289.127		1.08				60		1.08	1.08	64.8	1.08	64.7	1.075			1.075	2	1.10277
21	GUANOSINE MONOPHOSPHATE	C10H14N5O8P	363.058	Guanosine 5'-monophosphate disodium salt hydrate	1.06				74		1.1	1.1	66.2	1.13	67.5	1.057	1.057	1	1.075	2	1.07975
22	N,N-DIMETHYLARGININE	C8H18N4O2	202.143	NG,NG-Dimethylarginine dihydrochloride	1.09				40		1.13			1.13	67.5	1.099	1.103	1	1.099	1	1.10277
23	TYROSINE	C9H11NO3	181.074	L-Tyrosine	1.53				35		1.54	1.54	92.1	1.54	92.6	1.535	1.535	2	1.541	2	1.53552
24	ADENOSINE-MONOPHOSPHATE	C10H14N5O7P	347.063	Adenosine 5'-monophosphate disodium salt	1.54				71		1.54	1.54	92.1	1.55	92.8	1.535	1.535	2	1.525	2	1.53552
25	CYTIDINE	C9H13N3O5	243.086	Cytidine	1.55		Low signal		51		1.56	1.56	93.5	1.57	94	1.558	1.558	2	1.564	2	1.5764
26	THYMIDINE-MONOPHOSPHATE	C10H15N2O8P	322.057	Thymidine 5'-monophosphate disodium salt hydrate	1.57				64		1.56	1.56	93.5	1.57	94.2	1.564	1.558	2	1.564	2
27	HYPOXANTHINE	C5H4N4O	136.039	Hypoxanthine	1.6				18		1.59	1.6	96.1	1.59	95.6	1.604	1.604	2	1.595	2	1.60452
28	XANTHINE	C5H4N4O2	152.033	Xanthine	1.64				24		1.64	1.65	98.8	1.64	98.4	1.642	1.642	2			1.65052
29	URIDINE	C9H12N2O6	244.07	Uridine	1.81				52		1.81	1.81	108.6	1.81	108.8	1.816	1.812	2	1.816	2	1.81038
30	PANTOTHENATE	C9H17NO5	219.111	D-Pantothenic acid hemicalcium salt	1.83				44		1.83	1.83	110	1.84	110.2	1.831	1.835	2	1.831	2	1.83338
31	BETA-NICOTINAMIDE ADENINE DINUCLEOTIDE	C21H27N7O14P2	663.109	_-Nicotinamide adenine dinucleotide hydrate	1.86				83		1.88	1.88	112.8	1.91	114.4	1.88	1.88	2	1.893	2	1.87917
32	1-METHYLADENOSINE	C11H15N5O4	281.112		5.72				58		5.73	5.73	343.5	1.91	114.4	5.73	5.73	2	1.893	1	5.72462	Green cells are MS1-level identifications
33	PURINE	C5H4N4	120.044	Purine	2.22				8		2.24	2.24	134.2	2.24	134.4	2.225	2.234	2	2.225	2
34	5-HYDROXYTRYPTOPHAN	C11H12N2O3	220.085	5-Hydroxy-L-tryptophan	2.31				45		2.34			2.34	140.3	2.325	2.325	2	2.329	2
35	ADENINE	C5H5N5	135.054	Adenine	2.41				17		2.43	2.43	146	2.44	146.2	2.424	2.424	2	2.433	2
36	INOSINE	C10H12N4O5	268.081	Inosine	2.88				56		2.89	2.89	173.2	2.89	173.6	2.885	2.873	2	2.885	2	2.876
37	GUANOSINE	C10H13N5O5	283.092	Guanosine	3.01				59		3	3	180	3.04	182.2	3.011	3.006	2	3.011	2	3.00063
38	PHENYLALANINE	C9H11NO2	165.079	L-Phenylalanine	3.09				27		3.11	3.11	186.3	3.11	186.3	3.096	3.097	2	3.096	2	3.09213
39	S-ADENOSYLHOMOCYSTEINE	C14H20N6O5S	384.122	S-(5'-Adenosyl)-L-homocysteine	3.98				76		3.97	3.97	238.4	3.98	238.9	3.98	3.98	2	3.977	2	3.99673
40	THYMIDINE	C10H14N2O5	242.09	Thymidine	4.23				50		4.23	4.23	253.7	4.23	253.6	4.227	4.227	2	4.222	1	4.22923
41	BIOTIN	C10H16N2O3S	244.088	Biotin	4.39				53		4.37	4.39	263.4	4.37	262.3	4.388	4.388	2	4.365	2	4.39023
42	CYCLIC AMP	C10H12N5O6P	329.053	Adenosine 3',5'-cyclic monophosphate sodium salt monohydrate	4.43				66		4.43	4.43	266	4.44	266.5	4.434	4.434	2	4.427	2	4.43622
43	TRYPTOPHAN	C11H12N2O2	204.09	L-Tryptophan	4.47				42		4.47			4.47	267.9	4.474			4.474	2
44	ADENOSINE	C10H13N5O4	267.097	Adenosine	4.56				55		4.56	4.57	274.2	4.56	273.5	4.563	4.563	2	4.566	2	4.57272
45	THEOPHYLLINE	C7H8N4O2	180.065	Theophylline	5.47				34		5.47	5.48	328.7	5.47	328.2	5.471	5.474	2	5.471	2	5.4725
46	METHYLTHIOADENOSINE	C11H15N5O3S	297.09	5'-Deoxy-5'-(methylthio)adenosine	6.72				61		6.72	6.73	403.7	6.72	403	6.719	6.723	2	6.719	2	6.7241
47	RIBOFLAVIN	C17H20N4O6	376.138	(-)-Riboflavin	7.09			LUMICHROME	75		7.1	7.11	426.4	7.1	425.8	7.096	7.096	2	7.098	2	7.10603
48	MELATONIN	C13H16N2O2	232.121	Melatonin	8.26				48		8.27	8.27	495.9	8.27	495.9	8.269	8.269	1	8.272	2	8.28397
49	CORTISONE	C21H28O5	360.194	Cortisone	9.59				72		9.59	9.59	575.6	9.6	575.9	9.593	9.598	2	9.593	2	9.61012
50	CORTISOL	C21H30O5	362.209	Hydrocortisone	9.72				73		9.72	9.73	583.8	9.72	583.4	9.724	9.724	2	9.725	2	9.73027
51	ADENOSINE 5'-DIPHOSPHATE	C10H15N5O10P2	427.029	Adenosine 5'-diphosphate sodium salt		Not detected	Not detected		77		1.26	1.26	75.8	14.87	892.2	1.88	1.88	2
52	3-PHOSPHOGLYCERATE	C3H7O7P	185.993	D-(-)-3-Phosphoglyceric acid disodium salt	0.94	Not detected			38	*						0.94			0.94	1
53	THREONINE	C4H9NO3	119.058	L-Threonine	0.96		Low signal		7					0.98	58.8	0.98			0.98	2
54	CYTIDINE 2',3'-CYCLIC PHOSPHATE	C9H12N3O7P	305.041	Cytidine 2':3'-cyclic monophosphate monosodium salt	1.08		Not detected		63		1.08	1.08	64.8	1.07	64.2	1.08	1.08	2	1.075	2	1.10277
55	METHIONINE	C5H11NO2S	149.051	L-Methionine	1.32		Not detected		23		1.31	1.31	78.5			1.31	1.31	2	1.308	2
56	ISOLEUCINE	C6H13NO2	131.095	L-Isoleucine	1.58		Low Signal		13		1.58	1.58	95			1.581	1.581	2	1.572	2
57	CHOLINE	C5H14NO	104.108	Choline hydroxide solution	1.03		Not detected		4		1.03	1.03	62			1.034	1.034	2
58	CREATINE	C4H9N3O2	131.069	Creatine	1.03				12		1.03	1.03	62			1.034	1.034	2
59	O-ACETYLCARNITINE	C9H17NO4	203.116	O-Acetyl-L-carnitine hydrochloride	1.08		Not detected	CARNITINE	41		1.08	1.08	64.8			1.08	1.08	2			1.10277
60	PHOSPHORYLCHOLINE	C5H14NO4P	183.066	Phosphocholine chloride calcium salt tetrahydrate	1.06		Not detected		36		1.1	1.1	66.2			1.057	1.057	2			1.07972
61	ACETYLCHOLINE	C7H16NO2	146.118	Acetylcholine chloride	1.32		Not detected		21		1.29	1.29	77.2			1.332	1.332	2
62	HISTAMINE	C5H9N3	111.08	Histamine dihydrochloride	1.3		Not detected		6		1.33	1.33	79.9			1.31	1.31	2
63	NICOTINAMIDE	C6H6N2O	122.048	Nicotinamide	2.84		Not detected		9		2.83	2.83	170			2.835	2.835	2			2.8305
64	THYMINE	C5H6N2O2	126.043	Thymine	2.2		low signal		10		2.21	2.21	132.8
65	KYNURENINE	C10H12N2O3	208.085	DL-Kynurenine	2.85				43		2.83	2.83	170			2.837	2.837	2			2.84182
66	SEROTONIN	C10H12N2O	176.095	Serotonin hydrochloride	3.42		Not detected		31		3.42	3.42	205.3			3.425	3.425	2
67	TRYPTAMINE	C10H12N2	160.1	Tryptamine	6		Not detected		26		6.01	6.01	360.6			6.012	6.012	2
68	CAFFEINE	C8H10N4O2	194.08	Caffeine	6.46		Not detected		39		6.47	6.47	388.1			6.468	6.468	2			6.46773
69	CORTICOSTERONE	C21H30O4	346.214	Corticosterone	10.39				70		10.39	10.39	623.3	10.4	624	10.395	10.395	2			10.4116
70	LAUROYLCARNITINE	C19H37NO4	343.272	Lauroyl-L-carnitine	11.77				69		11.77	11.77	706.2	11.76	705.6	11.773	11.773	2			11.7693
71	SPHINGANINE	C18H39NO2	301.298	D-erythro-Dihydrosphingosine		Not detected	Not detected		62		13.06	13.06	783.5			13.064	13.064	2
72	L-ALANINE	C3H7NO2	89.0477	L-Alanine	1.03		Low signal		3							1.034	1.034	1
73	EPINEPHRINE	C9H13NO3	183.09	(-)-Epinephrine		Not detected	Not detected		37							1.835	1.835	1
74	CYSTEAMINE	C2H7NS	77.0299	Cysteamine		Not detected	Not detected		1
75	PYRUVATE	C3H4O3	88.016	Pyruvic acid		Not detected	Not detected		2
76	TRANS-4-HYDROXY-L-PROLINE	C5H9NO3	131.058	trans-4-Hydroxy-L-proline	0.98				11
77	HOMOCYSTEINE	C4H9NO2S	135.035	DL-Homocysteine		Not detected	Not detected		16
78	LYSINE	C6H14N2O2	146.106	L-Lysine	0.97		Not detected		20
79	PHOSPHOENOLPYRUVATE	C3H5O6P	167.982	Phospho(enol)pyruvic acid trisodium salt hydrate		Not detected	Not detected		28	*
80	PHOSPHOENOLPYRUVATE	C3H5O6P	167.982	Phospho(enol)pyruvic acid monopotassium salt		Not detected	Not detected		28	*
81	DIHYDROXYACETONE PHOSPHATE	C3H7O6P	169.998	Dihydroxyacetone phosphate dilithium salt		Not detected	Not detected		29	*
82	GLYCERALDEHYDE 3-PHOSPHATE	C3H7O6P	169.998	DL-Glyceraldehyde 3-phosphate diethyl acetal barium salt		Not detected	Not detected		29	*
83	GLYCEROL 3-PHOSPHATE	C3H9O6P	172.014	sn-Glycerol 3-phosphate bis(cyclohexylammonium) salt	0.94	Not detected			29	*
84	ALPHA-D-GLUCOSE	C6H12O6	180.063	_-D-Glucose	1.08	Na+	Not detected		33	*
85	SORBOSE	C6H12O6	180.063	L-(-)-Sorbose	1.06	Na+	Not detected		33	*
86	2-PHOSPHOGLYCERATE	C3H7O7P	185.993	L-2-Phosphoglyceric acid disodium salt hydrate	0.94	Not detected			38	*											0.940767
87	D-RIBOSE 5-PHOSPHATE	C5H11O8P	230.019	D-Ribose 5-phosphate disodium salt hydrate	0.95	Not detected			47					0.95	57
88	FRUCTOSE 6-PHOSPHATE	C6H13O9P	260.03	D-Fructose 6-phosphate disodium salt hydrate	0.94				54	*											0.940767
89	GLUCOSE 1-PHOSPHATE	C6H13O9P	260.03	_-D-Glucose 1-phosphate disodium salt hydrate	0.93				54	*
90	GLUCOSE 6-PHOSPHATE	C6H13O9P	260.03	D-Glucose 6-phosphate potassium salt	0.94				54	*
91	FRUCTOSE BISPHOSPHATE	C6H14O12P2	339.996	D-Fructose 1,6-bisphosphate trisodium salt hydrate		Not detected	Not detected		67

## Sheet: MetaboKit-negative
group	ISF	name	adduct	feature_m/z	NEGIDA-1.wiff	NEGIDA-2.wiff	NEGIDA-3.wiff	RT_NEGIDA-1.wiff	RT_NEGIDA-2.wiff	RT_NEGIDA-3.wiff	score_NEGIDA-1.wiff	score_NEGIDA-2.wiff	score_NEGIDA-3.wiff
1		L-Serine [M-H]- C3H7NO3 NIST 1189377---Serine C3H7NO3	M-H 1-	104.035		47.2	45.2		0.98	0.98		1	0.96
2		Threonine; LC-ESI-ITFT; MS2; CE 25.0 eV; [M-H]- C4H9NO3	M-H 1-	118.05		22.8			0.98			0.81
3		Purine C5H4N4	M-H 1-	119.036	404	402.9	424	2.21	2.24	2.24	0.95	0.95	0.95
4		L-Asparagine [M-H]- C4H8N2O3 NIST 1188004---L-Asparagine [M-H]- C4H8N2O3 NIST 1188005	M-H 1-	131.046	53.9	52.8	53.2	0.98	0.98	0.98	0.9	0.95	0.93
5		L-Aspartic acid [M-H]- C4H7NO4 NIST 1189478---L-Aspartic acid [M-H]- C4H7NO4 NIST 1189479	M-H 1-	132.03	159	166.6	162.2	0.95	0.95	0.96	0.92	0.96	0.99
6		Adenine C5H5N5 MoNA 440100	M-H 1-	134.047	425.8	415	410.6	2.43	2.43	2.44	0.95	0.95	0.96
7	*	Hypoxanthine C5H4N4O	M-H 1-	135.031	225.7	227.8	225.5	1.6	1.59	1.59	0.96	0.97	0.97
7	*	ISF of Hypoxanthine C5H4N4O	-	92.025	9.9		10.2	1.6		1.59	0.97		0.99
8		Indole-3-carboxaldehyde C9H7NO	M-H 1-	144.046	10.3	11.5	11.6	8.02	8.04	8.04	0.71	0.72	0.74
9		Glutamine; LC-ESI-ITFT; MS2; CE 50.0 eV; [M-H]- C5H10N2O3---Glutamine; LC-ESI-ITFT; MS2; CE 75.0 eV; [M-H]- C5H10N2O3---L-Glutamine [M-H]- C5H10N2O3 NIST 1187709	M-H 1-	145.062	73.1	72.8	73.9	0.98	0.98	0.98	0.87	0.91	0.9
10		L-Glutamic acid C5H9NO4 MassBank 3086---L-Glutamic acid [M-H]- C5H9NO4 NIST 1188749	M-H 1-	146.046	23.5		25.4	0.95		0.96	0.98		1
11		(R,R)-TARTARIC ACID C4H6O6---3-carboxy-2,3-dihydroxypropanoate C4H6O6 MoNA 440055	M-H 1-	149.009	298.7	302	286.3	14.74	14.76	14.73	0.91	0.96	0.87
12		Unknown (carbon number 5); PlaSMA ID-102 C5H4N4O2---Xanthine C5H4N4O2 MoNA 440035	M-H 1-	151.026	667.5	651.1	653.3	1.63	1.64	1.64	0.9	0.91	0.9
13		P-Anisic acid C8H8O3	M-H 1-	151.04	36.5	33.4	34.7	8.43	8.42	8.42	0.89	0.87	0.89
14		L-(-)-Phenylalanine; LC-ESI-QTOF; MS2; CE C9H11NO2	M-H 1-	164.071	382.5	380.6	369	3.09	3.1	3.11	0.96	0.96	0.97
15		Glycerophosphate(2) C3H9O6P	M-H 1-	171.006			47.4			0.96			0.98
16		Aconitic acid; PlaSMA ID-169 C6H6O6---cis-Aconitic acid C6H6O6 MoNA 439177	M-H 1-	173.009	99	91.2	90.6	14.86	14.76	14.9	0.63	0.6	0.54
17		L-Arginine [M-H]- C6H14N4O2 NIST 1188947---L-Arginine [M-H]- C6H14N4O2 NIST 1188948	M-H 1-	173.104	107.1	105.2		1	1		0.99	0.98
18		L-METHIONINE SULFOXIMINE C5H12N2O3S	M-H 1-	179.052		104.1	105.9		0.98	0.98		0.59	0.59
19		Theophylline C7H8N4O2---Theophylline C7H8N4O2 MoNA 436749	M-H 1-	179.058	2932.1	2887.4	2920.3	5.48	5.47	5.47	0.97	0.97	0.98
20		3-Hydroxyphenylalanine C9H11NO3---L-Tyrosine [M-H]- C9H11NO3 NIST 1187846	M-H 1-	180.066	483.7	477.7	470.5	1.53	1.54	1.55	0.95	0.96	0.96
21		1-Hydroxy-2-naphthoic acid [M-H]- C11H8O3 NIST 1198761	M-H 1-	187.04	56.6	53.5	67.5	8.69	8.64	8.7	0.94	0.97	0.95
22		4-Hydroxyquinoline C9H7NO---Indole-3-carboxaldehyde C9H7NO	M+HCOO 1-	190.05		9.8	9.8		2.84	2.85		0.79	0.79
23		CITRATE C6H8O7---Citric acid C6H8O7---Citric acid C6H8O7 MoNA 440017	M-H 1-	191.019	739.1	1490.6	1021.5	14.69	14.81	14.74	0.95	0.95	0.98
24		(2-Naphthalenyloxy)acetic acid C12H10O3 MoNA 436879	M-H 1-	201.055	13.2			8.04			0.94
25		NG,NG-Dimethyl-L-arginine [M-H]- C8H18N4O2 NIST 1105492	M-H 1-	201.135			95.4			1.12			0.61
26		L-Tryptophan [2M-H]- C11H12N2O2 NIST 1188390---L-Tryptophan [M-H]- C11H12N2O2 NIST 1188419---Tryptophan; LC-ESI-ITFT; MS2; HCD; CE 90.0 eV; [M-H]- C11H12N2O2	M-H 1-	203.082	82.6	80.8	80.7	4.48	4.48	4.47	0.95	0.93	0.99
27		2-Naphthalenesulfonic acid; LC-ESI-ITFT; MS2; CE C10H8O3S	M-H 1-	207.012	49	47.8	43.4	7.22	7.2	7.2	0.92	0.94	0.93
28		D-PANTOTHENIC ACID C9H17NO5---Pantothenate C9H17NO5---Pantothenic acid C9H17NO5	M-H 1-	218.103	601	576.6	609.7	1.83	1.82	1.84	0.97	0.97	0.95
29		5-Hydroxy-L-tryptophan [M-H]- C11H12N2O3 NIST 1184886---5-Hydroxy-L-tryptophan [M-H]- C11H12N2O3 NIST 1184887	M-H 1-	219.077	236.5	236.8	240.9	2.31	2.33	2.34	0.98	0.97	0.97
30	*	Carnosine C9H14N4O3---Carnosine C9H14N4O3 MassBank 2596	M-H 1-	225.099	143.7	136.1	142.1	1.03	1.03	1.03	0.85	0.79	0.82
30	*	ISF of Carnosine C9H14N4O3 MassBank 2596---Carnosine C9H14N4O3	-	154.062	222.1	222.6	212.6	1.03	1.03	1.03	0.75	0.82	0.82
31	*	ISF of Melatonin C13H16N2O2 MoNA 439448	-	216.09	71.2	73.9		8.28	8.28		0.99	0.96
31	*	Melatonin C13H16N2O2 MoNA 439448	M-H 1-	231.114	875.7	907	897.2	8.28	8.28	8.27	0.95	0.95	0.95
32		Anserine C10H16N4O3	M-H 1-	239.115	147.1	147.5	139.7	1.07	1.07	1.08	0.93	0.84	0.92
33		THYMIDINE C10H14N2O5	M-H 1-	241.083			938.2			4.23			0.76
34		Cytarabine C9H13N3O5	M-H 1-	242.079	41.1	40.7		1.56	1.57		0.84	0.76
35		URIDINE C9H12N2O6---Uridine C9H12N2O6	M-H 1-	243.062	725.6	705.3	717.3	1.81	1.82	1.81	0.86	0.85	0.82
36		BIOTIN C10H16N2O3S---Biotin C10H16N2O3S---Biotin C10H16N2O3S MoNA 436926	M-H 1-	243.081	2124.7	2175.7	2052	4.36	4.36	4.37	0.9	0.97	0.95
37		.alpha.-D-Galactose 1-phosphate [2M-H]- C6H13O9P NIST 1159669---.alpha.-D-Galactose 1-phosphate [M-H]- C6H13O9P NIST 1159743---D-Glucose 6-phosphate [2M-H]- C6H13O9P NIST 1178368---D-Glucose 6-phosphate [M-H-H2O]- C6H13O9P NIST 1178409	M-H 1-	259.021	106.5	150.3	137.3	1.18	1.15	1.16	0.88	0.91	0.82
38		D-Glucose 6-phosphate [2M-H]- C6H13O9P NIST 1178366---D-Mannose 6-phosphate [2M-H]- C6H13O9P NIST 1159962---D-Mannose-6-phosphate; LC-ESI-QTOF; MS2; CE C6H13O9P	M-H 1-	259.022	787	819.7	798.4	0.95	0.95	0.96	0.96	0.97	0.94
39	*	ISF of N-gamma-Acetyl-N-2-formyl-5-methoxykynurenamine C13H16N2O4	-	204.067			8.3			7.68			0.53
39	*	N-gamma-Acetyl-N-2-formyl-5-methoxykynurenamine C13H16N2O4	M-H 1-	263.104	7.1	6.8	6.8	7.68	7.68	7.68	0.79	0.7	0.73
40		Dodecyl sulfate; PlaSMA ID-444 C12H26O4S	M-H 1-	265.148	388.5	392.4	379.7	12.07	12.06	12.06	0.74	0.75	0.76
41	*	Adenosine C10H13N5O4---Adenosine C10H13N5O4 MoNA 436595---Adenosine; LC-ESI-QTOF; MS2; CE C10H13N5O4	M-H 1-	266.089	81.9	84.3	79.9	4.57	4.57	4.56	1	0.99	0.98
41	*	ISF of Adenosine; LC-ESI-QTOF; MS2; CE C10H13N5O4---Adenosine C10H13N5O4---Adenosine C10H13N5O4 MoNA 436595	-	134.047	89.3	91.9	87.8	4.57	4.57	4.56	0.98	0.93	0.96
42		Homocystine C8H16N2O4S2	M-H 1-	267.048	115.6	113.8	108.4	1.07	1.07	1.05	0.92	0.96	0.89
43	*	ISF of Inosine C10H12N4O5 MoNA 439079	-	135.031		13.5	13.6		2.88	2.89		0.68	0.77
43	*	Inosine C10H12N4O5 MoNA 439079	M-H 1-	267.073	338.4	333.7	345.1	2.86	2.88	2.89	0.98	0.97	0.97
44		6-Phosphogluconic acid [2M-H]- C6H13O10P NIST 1179934---6-Phosphogluconic acid [M-H-H2O]- C6H13O10P NIST 1179949	M-H 1-	275.017		129.1	131.8		0.95	0.96		0.94	0.82
44		D-Ribose 5-phosphate [M-H]- C5H11O8P NIST 1159938	M+HCOO 1-	275.017	125.5			0.95			0.87
45		Dibutyl phthalate C16H22O4 MoNA 436807	M-H 1-	277.144		65.6			11.07			0.53
46		1-Methyladenosine [2M-H]- C11H15N5O4 NIST 1070098	M-H 1-	280.105	36.2	35.5	38.9	1.88	1.89	1.91	0.81	0.95	0.94
47	*	ISF of N6-Methyladenosine C11H15N5O4	-	148.063	424.4	413.8	430.1	5.73	5.71	5.73	0.79	0.72	0.83
47	*	ISF of N6-Methyladenosine C11H15N5O4	-	133.039	14.3			5.71			0.71
47	*	N6-Methyladenosine C11H15N5O4	M-H 1-	280.105	341	338	347.4	5.73	5.71	5.73	0.94	0.95	0.93
48		Glucose 1-phosphate [M-H]- C6H13O9P NIST 1170654	M+Na-2H 1-	281.004	49.1			0.95			0.64
49		GUANOSINE C10H13N5O5---Guanosine C10H13N5O5---Guanosine; LC-ESI-QTOF; MS2; CE C10H13N5O5	M-H 1-	282.084	1584.6	1560.2	1638.7	2.99	3	3.04	0.98	0.97	0.97
50		Thymidine C10H14N2O5	M+HCOO 1-	287.088	304.7	307.4	314.9	4.22	4.24	4.23	0.91	0.93	0.92
51		OPHTHALMIC ACID C11H19N3O6	M-H 1-	288.12	655.8	640.2	634.9	1.1	1.1	1.1	0.91	0.92	0.83
52		Uridine C9H12N2O6 MoNA 438629	M+HCOO 1-	289.067	71.4	68.9	69.5	1.81	1.82	1.81	0.93	0.94	0.95
53	*	5'-Methylthioadenosine C11H15N5O3S---5'-Methylthioadenosine C11H15N5O3S MassBank 5071---5'-S-Methylthioadenosine; LC-ESI-QTOF; MS2; CE C11H15N5O3S	M-H 1-	296.082	154.4	162.5	149.8	6.72	6.72	6.72	0.97	0.98	0.99
53	*	ISF of 5'-S-Methylthioadenosine; LC-ESI-QTOF; MS2; CE C11H15N5O3S---5'-Methylthioadenosine C11H15N5O3S MassBank 5071---5'-Methylthioadenosine C11H15N5O3S	-	134.047	116.5	122.8	120.4	6.72	6.72	6.72	0.93	0.83	0.97
54		C10-LAS (STANDARD MIX) C16H26O3S	M-H 1-	297.153	1299	1221.4	1295.9	12.16	12.16	12.16	0.76	0.76	0.74
55		Cytidine 2',3'-cyclic monophosphoric acid [M-H]- C9H12N3O7P NIST 1159640---Cytidine 2',3'-cyclic monophosphoric acid [M-H]- C9H12N3O7P NIST 1159641---Cytidine 2',3'-cyclic monophosphoric acid [M-H]- C9H12N3O7P NIST 1159642	M-H 1-	304.034	321.8	312.8	312.7	1.07	1.07	1.08	0.97	0.98	0.98
56		Guanosine; LC-ESI-QTOF; MS2; CE C10H13N5O5	M+Na-2H 1-	304.066		37.9			3			0.54
57		C12-AE1S (TENTATIVE) C14H30O5S	M-H 1-	309.173	132	133.9		12.45	12.45		0.88	0.87
58		C11-LAS (STANDARD MIX) C17H28O3S	M-H 1-	311.168	3996.2	3907.3	3915.5	12.5	12.49	12.5	0.74	0.75	0.75
59		Adenosine C10H13N5O4 MoNA 436594	M+HCOO 1-	312.094	156.3	165.3	156.2	4.57	4.57	4.56	0.99	0.99	0.99
60		Guanosine C10H13N5O5 MassBank 3018	M+Cl 1-	318.06	9			3.02			0.92
61		5-Thymidylic acid C10H15N2O8P MassBank 5092---Thymidine??5'-monophosphate C10H15N2O8P	M-H 1-	321.049	374.5	388.4	371.8	1.56	1.57	1.57	0.99	0.98	0.99
62		URIDINE-5-MONOPHOSPHATE C9H13N2O9P---Uridine 5'-monophosphate [M-H]- C9H13N2O9P NIST 1173795	M-H 1-	323.028	1088.6	1081.7	1072.6	1	1	1.01	0.96	0.98	0.97
63		4-Dodecylbenzenesulfonic Acid C18H30O3S MoNA 440645	M-H 1-	325.184	2874.3	3073.6	2989.6	12.82	12.8	12.8	0.89	0.89	0.89
64		1-Methyladenosine C11H15N5O4	M+HCOO 1-	326.11	72.8	72.9	74	1.88	1.89	1.91	0.97	0.97	0.98
65		N6-Methyladenosine C11H15N5O4	M+HCOO 1-	326.11	930.7	925.4	943.9	5.73	5.71	5.73	0.96	0.97	0.97
66		Adenosine 2',3'-cyclic monophosphate [M-H]- C10H12N5O6P NIST 1161602---Adenosine 3',5'-cyclic monophosphate [M-H]- C10H12N5O6P NIST 1178318---Adenosine 3',5'-cyclic monophosphate [M-H]- C10H12N5O6P NIST 1178319---Adenosine 3',5'-cyclic monophosphate [M-H]- C10H12N5O6P NIST 1178320	M-H 1-	328.045	1113.3	1093.2	1080.1	4.43	4.43	4.44	0.98	0.98	0.98
67		Lactulose C12H22O11	M-H 1-	341.108	921.3	888.8	927.3	1.07	1.07	1.08	0.94	0.97	0.92
68		5'-Methylthioadenosine C11H15N5O3S	M+HCOO 1-	342.087	255.6	261.7	256.5	6.72	6.72	6.72	0.98	0.99	0.99
69		Uridine 5'-monophosphate [2M-H]- C9H13N2O9P NIST 1173763	M+Na-2H 1-	345.01			74.5			0.98			0.55
70		Adenosine 5'-monophosphate C10H14N5O7P	M-H 1-	346.055	659.4	681.4	662.6	1.53	1.54	1.55	0.95	0.96	0.97
71		Adenosine 2',3'-cyclic monophosphate [M-H]- C10H12N5O6P NIST 1161599---Adenosine 2',3'-cyclic monophosphate [M-H]- C10H12N5O6P NIST 1161600---Adenosine 2',3'-cyclic monophosphate [M-H]- C10H12N5O6P NIST 1161601	M+Na-2H 1-	350.026	26.8	27	24.7	4.43	4.43	4.44	0.99	0.83	0.86
72		Rosmarinic acid [M-H]- C18H16O8 NIST 1129023---Rosmarinic acid [M-H]- C18H16O8 NIST 1129024---Rosmarinic acid; LC-ESI-QTOF; MS2; CE C18H16O8	M-H 1-	359.076	12.5	13.2	11.8	6.82	6.83	6.83	0.89	0.81	0.82
73		Cortisone C21H28O5 MoNA 436446---Cortisone [M-H]- C21H28O5 NIST 1060530---Cortisone [M-H]- C21H28O5 NIST 1060532	M-H 1-	359.185	92.2	95.1	95.2	9.59	9.61	9.6	0.89	0.94	0.93
74	*	Cortisol C21H30O5 MoNA 440132	M-H 1-	361.201	254.3	254.1	248.5	9.71	9.72	9.72	0.93	0.91	0.92
74	*	ISF of Cortisol C21H30O5 MoNA 440132	-	331.191	847.6	853.5	843.3	9.74	9.72	9.72	0.98	0.97	0.95
75		Guanosine monophosphate C10H14N5O8P MoNA 439075---Guanosine-5'-monophosphate C10H14N5O8P	M-H 1-	362.05	265.6	272.2	260.5	1.1	1.1	1.1	0.93	0.92	0.97
76	*	ISF of Riboflavin C17H20N4O6	-	255.089			173			7.1			0.93
76	*	Riboflavin C17H20N4O6	M-H 1-	375.13	420	405.4	407.9	7.09	7.1	7.1	0.96	0.97	0.98
77		D-(+)-Trehalose; LC-ESI-QTOF; MS2; CE C12H22O11---Unknown (carbon number 12); PlaSMA ID-789 C12H22O11	M+Cl 1-	377.085	107.3	93.9	101	1.07	1.07	1.08	0.89	0.82	0.88
78		S-Adenosyl-homocysteine C14H20N6O5S---S-Adenosylhomocysteine C14H20N6O5S MassBank 6264	M-H 1-	383.114	764.9	707	731.6	3.97	3.97	3.98	0.97	0.97	0.97
79		FAHFA 23:0; FAHFA 14:0/9:0; [M-H]- C23H44O4	M-H 1-	383.315		23.9			14.26			0.68
80		D-(+)-Trehalose; LC-ESI-QTOF; MS2; CE C12H22O11	M+HCOO 1-	387.113	558.3	533.7	543.4	1.07	1.07	1.08	0.9	0.89	0.89
81		LAUROYLCARNITINE C19H37NO4	M+HCOO 1-	388.27			137.1			11.76			0.96
82		(-)-11-Nor-9-carboxy-.DELTA.9-THC [M+H]+ C21H28O4 NIST 1206889	M+HCOO 1-	389.196	49.2	50.6	52.5	10.4	10.4	10.4	0.68	0.71	0.67
83		13,14-Dehydro-15-cyclohexyl Carbaprostacyclin [M-H]- C21H30O4 NIST 1132531	M+HCOO 1-	391.212	3342.1	3499.5	3413	10.4	10.4	10.4	0.62	0.59	0.55
84		Deoxycholic acid; LC-ESI-QTOF; MS2; CE C24H40O4---Isodeoxycholic acid [2M-H]- C24H40O4 NIST 1165359---Isodeoxycholic acid [M-H]- C24H40O4 NIST 1165379	M-H 1-	391.284	47.3	55.7	52	12.5	12.49	12.5	0.76	0.61	0.69
85		Cortisone C21H28O5 MoNA 436445---Cortisone C21H28O5 MoNA 436446---Cortisone [M-H]- C21H28O5 NIST 1060528	M+Cl 1-	395.162	162.4	157.8	165.7	9.59	9.61	9.6	0.71	0.85	0.85
86		17,20,21-Trihydroxypregn-1-ene-3,11-dione [M-H]- C21H30O5 NIST 1111692---Cortisol C21H30O5 MoNA 440132	M+Cl 1-	397.178	1582.8	1576.5	1603.2	9.71	9.72	9.72	0.68	0.77	0.58
87		Cortisone C21H28O5 MoNA 436446---Cortisone [M-H]- C21H28O5 NIST 1060530	M+HCOO 1-	405.191	360.8	369.2	367.9	9.59	9.61	9.6	0.99	0.98	0.98
88		17,20,21-Trihydroxypregn-1-ene-3,11-dione [M-H]- C21H30O5 NIST 1111692	M+HCOO 1-	407.207	23.8	21.3	17.3	9.44	9.44	9.44	0.69	0.68	0.69
89		17,20,21-Trihydroxypregn-1-ene-3,11-dione [M-H]- C21H30O5 NIST 1111691	M+HCOO 1-	407.206	7.1			8.43			0.7
90		Cortisol C21H30O5 MoNA 440132	M+HCOO 1-	407.207	6217.9	6192.4	6253.4	9.71	9.72	9.72	0.81	0.84	0.82
91		Allocholic acid C24H40O5 MoNA 439335---Allocholic acid C24H40O5 MoNA 439336---Allocholic acid C24H40O5 MoNA 440683---Allocholic acid C24H40O5 MoNA 440684---Cholic acid C24H40O5 MoNA 439335---Cholic acid C24H40O5 MoNA 439336---Cholic acid C24H40O5 MoNA 440683---Cholic acid C24H40O5 MoNA 440684	M-H 1-	407.279	74.9	83.7	88	11.62	11.62	11.62	0.92	0.89	0.92
92		(-)-Riboflavin; LC-ESI-QTOF; MS2; CE C17H20N4O6---Riboflavin C17H20N4O6	M+Cl 1-	411.106	58.8	57.7	60	7.09	7.1	7.1	0.97	0.95	0.96
93		FAHFA 25:0; FAHFA 16:0/9:0; [M-H]- C25H48O4	M-H 1-	411.347	28.1	73.6	58.5	13.64	13.7	13.66	0.89	0.94	0.91
94		Riboflavin C17H20N4O6	M+HCOO 1-	421.135	198.5	205	188.4	7.09	7.1	7.1	0.98	0.98	0.97
95		Adenosine 5'-diphosphate [M-H]- C10H15N5O10P2 NIST 1161684---Adenosine 5'-diphosphate [M-H]- C10H15N5O10P2 NIST 1161685	M-H 1-	426.02	22.3	22.7	35.5	14.92	14.95	14.81	0.92	0.92	0.93
96		Ursodeoxycholic acid [2M-H]- C24H40O4 NIST 1173708	M+HCOO 1-	437.29	22.7			11.27			0.96
97		FAHFA 27:0; FAHFA 18:0/9:0; [M-H]- C27H52O4	M-H 1-	439.378	109.5	111.1	98	13.68	13.7	13.69	0.93	0.93	0.92
98		Cholic acid C24H40O5	M+HCOO 1-	453.284	39.8	39.8	38.1	11.62	11.62	11.62	0.97	0.97	0.98
99		Naltrindole C26H26N2O3	M+HCOO 1-	459.196	22.4	22.1		10.4	10.4		0.66	0.56
100		Perfluorononanoic acid C9HF17O2 MoNA 435965	M-H 1-	462.962		44.1			11.46			0.95
101		Cytidine 5'-diphosphocholine [M-H]- C14H26N4O11P2 NIST 1068498	M-H 1-	487.099			68.9			0.98			0.79
102		Cytidine 5'-diphosphocholine [M-H]- C14H26N4O11P2 NIST 1068496---Cytidine 5'-diphosphocholine [M-H]- C14H26N4O11P2 NIST 1068497---Cytidine 5'-diphosphocholine [M-H]- C14H26N4O11P2 NIST 1068498	M+HCOO 1-	533.104	168.7	173.7	165.5	0.98	0.98	0.98	0.93	0.9	0.88
103		Adenosine 5'-diphosphoribose [M-H]- C15H23N5O14P2 NIST 1068483---Adenosine 5'-diphosphoribose [M-H]- C15H23N5O14P2 NIST 1068484---Adenosine 5'-diphosphoribose [M-H]- C15H23N5O14P2 NIST 1068486	M-H 1-	558.063	113.4	109.2	106.1	1.07	1.07	1.08	0.88	0.92	0.91
104		Uridine 5'-diphosphogalactose [M-H]- C15H24N2O17P2 NIST 1174032	M-H 1-	565.046	422.2	428.3	419.7	0.95	0.95	0.96	0.91	0.91	0.91
105	*	ISF of Uridine diphosphate glucuronic acid C15H22N2O18P2	-	402.993	38			0.93			0.83
105	*	Uridine diphosphate glucuronic acid C15H22N2O18P2	M-H 1-	579.026	394.3	384.5	386.8	0.91	0.91	0.91	0.81	0.81	0.81
106		Uridine-5-diphosphoacetylgalactosamine C17H27N3O17P2---Uridine-5-diphosphoacetylglucosamine C17H27N3O17P2	M-H 1-	606.073	270.5	275.2	258.6	0.95	0.95	0.96	0.7	0.75	0.69
107		3,3',5'-Triiodo-L-thyronine [M-H]- C15H12I3NO4 NIST 1160542---3,3',5'-Triiodo-L-thyronine [M-H]- C15H12I3NO4 NIST 1160546	M-H 1-	649.782	55.5	56.4	54.2	9.98	9.97	9.98	0.63	0.64	0.64
108	*	.beta.-Nicotinamide adenine dinucleotide [M-H]- C21H27N7O14P2 NIST 1179489	M-H 1-	662.101	581.8	582.6	570.1	1.88	1.89	1.91	0.97	0.97	0.97
108	*	ISF of .beta.-Nicotinamide adenine dinucleotide [M-H]- C21H27N7O14P2 NIST 1179489	-	540.052	324.7	327.1	323.8	1.88	1.89	1.88	0.94	0.94	0.95
109		L-Thyroxine C15H11I4NO4---Thyroxine - CASMI2016 Category 1 - Challenge 17 C15H11I4NO4	M-H 1-	775.679		24	23.2		10.57	10.57		0.51	0.55

## Sheet: MetaboKit-positive
group	ISF	name	adduct	feature_m/z	PosIDA-1.wiff	PosIDA-2.wiff	PosIDA-3.wiff	RT_PosIDA-1.wiff	RT_PosIDA-2.wiff	RT_PosIDA-3.wiff	score_PosIDA-1.wiff	score_PosIDA-2.wiff	score_PosIDA-3.wiff
1		Vanylglycol [M+H-H2O]+ C9H12O4 NIST 1060927	M+2H 2+	93.0437			15.6			1.06			0.66
2		Cyclohexylamine [M+H]+ C6H13N NIST 1065492	M+H 1+	100.111	69.7	72.6	72.3	3.88	3.88	3.87	0.98	0.98	0.98
3		Choline cation [Cat]+ C5H14NO NIST 1067855---Choline cation [Cat]+ C5H14NO NIST 1067856	M 1+	104.106	815	834.5	818	1.03	1.03	1.03	0.98	0.98	0.98
4	*	Histamine C5H9N3	M+H 1+	112.086	209.2	214.8	214.9	1.31	1.31	1.33	0.89	0.9	0.89
4	*	ISF of Histamine C5H9N3	-	95.0595	290.7	295.5	280.3	1.31	1.31	1.31	0.96	0.94	0.96
5		Creatinine [M+H]+ C4H7N3O NIST 1061055---Creatinine [M+H]+ C4H7N3O NIST 1061060	M+H 1+	114.065	60.3		59.3	1.15		1.15	0.86		0.58
6		.beta.-Cyano-L-alanine [M+H]+ C4H6N2O2 NIST 1058614	M+H 1+	115.053	24.4			8.27			0.56
6		Ozagrel [M+H]+ C13H12N2O2 NIST 1105353	M+2H 2+	115.053			27.6			8.26			0.56
7		8-Methylflavone [M+H]+ C16H12O2 NIST 1159401	M+2H 2+	119.048	56.7	52.6	8.8	1.53	1.52	11.95	0.69	0.76	0.78
8		1H-Benzotriazole; LC-ESI-ITFT; MS2; CE C6H5N3	M+H 1+	120.055	14.4	12.9	13.5	6.56	6.56	6.57	0.87	0.85	0.84
9		Purine C5H4N4	M+H 1+	121.05	820.9	810.6	767.4	2.24	2.23	2.24	0.98	0.99	0.98
10		Isonicotinamide [M+H]+ C6H6N2O NIST 1192306---Niacinamide; LC-ESI-QTOF; MS2; CE C6H6N2O	M+H 1+	123.054	47.1	52.6		1.88	1.9		0.54	0.57
11	*	ISF of Niacinamide [2M+H]+ C6H6N2O NIST 1061094	-	80.0486	95.8	93	86.6	2.83	2.85	2.84	0.93	0.89	0.96
11	*	Niacinamide [2M+H]+ C6H6N2O NIST 1061094	M+H 1+	123.055	4308.4	4151.7	4379.9	2.83	2.83	2.84	0.99	0.99	0.99
12		Thymine C5H6N2O2 MassBank 3820	M+H 1+	127.049	410.3	405.5	369.2	2.21	2.23	2.21	0.93	0.93	0.94
13		D-Pyroglutamic acid [M+H]+ C5H7NO3 NIST 1059574	M+H 1+	130.049	52.3	56.2	55.4	0.96	0.96	0.96	0.85	0.86	0.86
14		Creatine [M+H]+ C4H9N3O2 NIST 1063404	M+H 1+	132.076	1481	1544.2	1504.2	1.03	1.03	1.03	0.97	0.97	0.97
15	*	ISF of L-Isoleucine [M+H]+ C6H13NO2 NIST 1075957	-	86.0956	323.9	303.2	301.6	1.6	1.61	1.6	0.94	0.94	0.92
15	*	L-Isoleucine [M+H]+ C6H13NO2 NIST 1075957	M+H 1+	132.101	169.7	157.4	166.5	1.58	1.58	1.58	0.98	0.97	0.97
16		L-Aspartic acid [M+H]+ C4H7NO4 NIST 1076048---L-Aspartic acid [M+H]+ C4H7NO4 NIST 1076049---L-Aspartic acid [M+H]+ C4H7NO4 NIST 1076050	M+H 1+	134.044	29.9	29.2	29.8	0.92	0.92	0.92	0.97	0.97	0.97
17		1,4-Dibenzylpiperazine [M+H]+ C18H22N2 NIST 1220151	M+2H 2+	134.095	100.8	96		8.81	8.8		0.63	0.62
17		2-Methylindoline [M+H]+ C9H11N NIST 1197856	M+H 1+	134.095			90.4			8.81			0.66
18	*	Adenine [2M+H]+ C5H5N5 NIST 1057273	M+H 1+	136.061	2468.2	2389.1	2462.2	2.42	2.43	2.42	0.99	0.98	0.99
18	*	ISF of Adenine [2M+H]+ C5H5N5 NIST 1057273	-	119.034	125.1	119.7	123.2	2.42	2.43	2.42	0.91	0.9	0.9
19	*	Hypoxanthine [M+H]+ C5H4N4O NIST 1072315	M+H 1+	137.045	2021	1883.9	1973.6	1.6	1.61	1.6	0.97	0.97	0.97
19	*	ISF of Hypoxanthine [M+H]+ C5H4N4O NIST 1072315	-	110.034	55.8			1.62			0.58
20		UROCANIC ACID C6H6N2O2---Urocanic acid C6H6N2O2	M+H 1+	139.049	40.2	41.2	37.5	14.74	14.75	14.71	0.92	0.89	0.92
21	*	Acetylcholine cation [Cat]+ C7H16NO2 NIST 1065239---Acetylcholine cation [Cat]+ C7H16NO2 NIST 1065240	M 1+	146.117	1512.8	1555.3	1476.1	1.29	1.29	1.29	0.99	0.99	0.99
21	*	ISF of Acetylcholine cation [Cat]+ C7H16NO2 NIST 1065240---Acetylcholine cation [Cat]+ C7H16NO2 NIST 1065239	-	87.0432	252.2	256.6	243.9	1.29	1.29	1.29	0.89	0.83	0.85
22		5,6-Dimethylbenzimidazole C9H10N2	M+H 1+	147.091	183	159.1	158.7	8.74	8.74	8.74	0.95	0.95	0.96
23	*	4-Chromanone [M+H]+ C9H8O2 NIST 1227936	M+H 1+	149.058	16.3	15.5	15.1	3.09	3.1	3.09	0.65	0.65	0.65
23	*	ISF of 4-Chromanone [M+H]+ C9H8O2 NIST 1227936	-	103.053	104.3	99.2	97.1	3.09	3.1	3.09	0.71	0.73	0.75
24	*	ISF of L-Methionine [M+H]+ C5H11NO2S NIST 1076064---L-Methionine [M+H]+ C5H11NO2S NIST 1076065	-	104.052	60.1	58.7	58.9	1.31	1.31	1.31	0.82	0.81	0.83
24	*	ISF of L-Methionine [M+H]+ C5H11NO2S NIST 1076064---L-Methionine [M+H]+ C5H11NO2S NIST 1076065	-	133.031	163.2	165	156.1	1.31	1.31	1.31	0.75	0.72	0.7
24	*	L-Methionine [M+H]+ C5H11NO2S NIST 1076064---L-Methionine [M+H]+ C5H11NO2S NIST 1076065	M+H 1+	150.057	222.8	225.3	215.2	1.31	1.31	1.31	0.97	0.98	0.98
25		2-Hydroxybenzothiazole C7H5NOS	M+H 1+	152.015			14.6			8.74			0.63
26		Guanine C5H5N5O	M+H 1+	152.056		24.9			1.58			0.87
27	*	ISF of Xanthine [M+H]+ C5H4N4O2 NIST 1061009---Xanthine [M+H]+ C5H4N4O2 NIST 1061004	-	110.034	55.8		53.7	1.62		1.63	0.62		0.55
27	*	Xanthine [M+H]+ C5H4N4O2 NIST 1061004---Xanthine [M+H]+ C5H4N4O2 NIST 1061009	M+H 1+	153.04	412.7	396.6	404.7	1.65	1.63	1.65	0.96	0.94	0.95
28	*	1,4-Diaminonaphthalene [M+H]+ C10H10N2 NIST 1066597---1,4-Diaminonaphthalene [M+H]+ C10H10N2 NIST 1066598---1,5-Diaminonaphthalene [M+H]+ C10H10N2 NIST 1064443	M+H 1+	159.09	13.2	12.6	11.6	6.03	6.04	6.03	0.61	0.65	0.66
28	*	ISF of 1,4-Diaminonaphthalene [M+H]+ C10H10N2 NIST 1066597---1,5-Diaminonaphthalene [M+H]+ C10H10N2 NIST 1064443---1,4-Diaminonaphthalene [M+H]+ C10H10N2 NIST 1066598	-	132.08	21.3	21.9	21.4	6.01	6.01	6.01	0.84	0.9	0.91
29		Indoleacetaldehyde C10H9NO MoNA 448019	M+H 1+	160.075	159.7		158.6	4.18		4.18	0.5		0.57
30	*	ISF of Tryptamine [M+H-NH3]+ C10H12N2 NIST 1065667---Tryptamine [M+H]+ C10H12N2 NIST 1065657	-	117.069		33.8			6.01			0.95
30	*	ISF of Tryptamine [M+H-NH3]+ C10H12N2 NIST 1065667---Tryptamine [M+H]+ C10H12N2 NIST 1065657	-	144.08	3165.6	3124.2	3153.9	6.01	6.01	6.01	0.98	0.97	0.99
30	*	ISF of Tryptamine [M+H-NH3]+ C10H12N2 NIST 1065667---Tryptamine [M+H]+ C10H12N2 NIST 1065657	-	115.053			30.7			6.01			0.87
30	*	Tryptamine [M+H-NH3]+ C10H12N2 NIST 1065667---Tryptamine [M+H]+ C10H12N2 NIST 1065657	M+H 1+	161.106	290.9	294.5	293.3	6.01	6.01	6.01	0.96	0.97	0.97
31		Carnitine C7H15NO3	M+H 1+	162.112	550	556.7	564.3	0.99	0.99	0.99	0.97	0.97	0.97
32		3,4-Dihydrocoumarin [2M+H]+ C9H8O2 NIST 1159003---3,4-Dihydrocoumarin [M+H]+ C9H8O2 NIST 1158986	M+NH4 1+	166.085	139.5	59.7	137.4	1.6	1.48	1.63	0.56	0.51	0.51
33	*	ISF of Phenylalanine C9H11NO2	-	103.053	104.3	99.2	97.1	3.09	3.1	3.09	0.74	0.77	0.8
33	*	ISF of Phenylalanine C9H11NO2	-	120.08	851.9	829.2	800.6	3.09	3.1	3.09	0.88	0.87	0.89
33	*	Phenylalanine C9H11NO2	M+H 1+	166.085	415.2	422.6	395.6	3.09	3.1	3.09	0.99	0.99	0.99
34		dl-.beta.-Phenyllactic acid [M+Na]+ C9H10O3 NIST 1055534	M+Li 1+	173.08		93.5			9.62			0.52
35		2-Methylbenzoic acid [M+H]+ C8H8O2 NIST 1197886	M+K 1+	175.014		26.5			10.4			0.53
36	*	ISF of L-Arginine [M+H]+ C6H14N4O2 NIST 1075986	-	116.07	50.4			1.01			0.81
36	*	L-Arginine [M+H]+ C6H14N4O2 NIST 1075986	M+H 1+	175.118	708.9	726.9	742.7	1.01	1.01	1.01	0.99	0.99	0.99
37		Serotonin [M+H-NH3]+ C10H12N2O NIST 1186902---Serotonin [M+H]+ C10H12N2O NIST 1067788	M+H 1+	177.101	52.7	50.5	55.3	4.32	4.32	4.3	0.8	0.78	0.79
38	*	ISF of Serotonin [M+H-NH3]+ C10H12N2O NIST 1067806---Serotonin [M+H-NH3]+ C10H12N2O NIST 1067807	-	160.075	1066.7	1079.8	1057	3.42	3.43	3.42	0.98	0.98	0.99
38	*	Serotonin [M+H-NH3]+ C10H12N2O NIST 1067806---Serotonin [M+H-NH3]+ C10H12N2O NIST 1067807	M+H 1+	177.101	134.6	136.1	131.2	3.42	3.43	3.42	0.97	0.97	0.97
39		C10H11NO2; PlaSMA ID-458 C10H11NO2	M+H 1+	178.085	94.2	46.8		3.07	3.17		0.55	0.55
40		N-tert-Butyl-.alpha.-phenylnitrone [2M+H]+ C11H15NO NIST 1112983	M+H 1+	178.122			14.1			10.56			0.5
41		Aspirin C9H8O4 MoNA 444374	M+H 1+	181.049	6.8			12.98			0.56
42	*	ISF of Theophylline [2M+H]+ C7H8N4O2 NIST 1067888---Theophylline [2M+H]+ C7H8N4O2 NIST 1067890	-	124.05	74.1	78.5	71	5.48	5.48	5.47	0.88	0.65	0.85
42	*	Theophylline [2M+H]+ C7H8N4O2 NIST 1067888---Theophylline [2M+H]+ C7H8N4O2 NIST 1067890	M+H 1+	181.072	3020.8	3190.4	2819.3	5.48	5.48	5.47	0.98	0.98	0.98
43	*	ISF of L-Tyrosine [M+H]+ C9H11NO3 NIST 1075803	-	123.043	89.2	86.8	87.9	1.53	1.54	1.54	0.61	0.76	0.66
43	*	ISF of L-Tyrosine [M+H]+ C9H11NO3 NIST 1075803	-	136.075	213.5	202.5	208.6	1.53	1.54	1.54	0.79	0.78	0.78
43	*	ISF of L-Tyrosine [M+H]+ C9H11NO3 NIST 1075803	-	147.043	49	49.1	50.5	1.53	1.54	1.54	0.82	0.78	0.84
43	*	ISF of L-Tyrosine [M+H]+ C9H11NO3 NIST 1075803	-	165.054	209.2	195.9	205.6	1.53	1.54	1.54	0.89	0.89	0.92
43	*	L-Tyrosine [M+H]+ C9H11NO3 NIST 1075803	M+H 1+	182.08	335.9	326.2	340.8	1.53	1.54	1.54	0.97	0.97	0.97
44		Phosphocholine C5H14NO4P	M+H 1+	184.073	296.1	292.7	291.6	1.1	1.08	1.08	0.97	0.98	0.96
45	*	3-Indoleacrylic acid [M+H]+ C11H9NO2 NIST 1057331	M+H 1+	188.07	125.8	123.6	124.4	4.48	4.48	4.48	0.62	0.65	0.63
45	*	ISF of 3-Indoleacrylic acid [M+H]+ C11H9NO2 NIST 1057331	-	144.079	7.9	7	7.1	4.48	4.46	4.46	0.52	0.53	0.61
45	*	ISF of 3-Indoleacrylic acid [M+H]+ C11H9NO2 NIST 1057331	-	146.059	19.7			4.48			0.53
46	*	5-Methoxytryptamine C11H14N2O	M+H 1+	191.117	137	144	148.2	8.27	8.28	8.26	0.96	0.94	0.95
46	*	ISF of 5-Methoxytryptamine C11H14N2O	-	159.067	162.2	175.9	177.3	8.27	8.28	8.26	0.91	0.93	0.84
46	*	ISF of 5-Methoxytryptamine C11H14N2O	-	174.091	7394.3	8296.5	8004.4	8.27	8.28	8.26	0.94	0.94	0.96
47		Diethyltoluamide [M+H]+ C12H17NO NIST 1198823	M+H 1+	192.138	11.7	10.7	11.8	10.49	10.49	10.48	0.79	0.69	0.71
48		Citric acid [M+H]+ C6H8O7 NIST 1058882---Citric acid [M+H]+ C6H8O7 NIST 1058883	M+H 1+	193.033	35.8	34.7	37.6	14.89	14.92	14.9	0.96	0.96	0.96
49	*	Caffeine C8H10N4O2	M+H 1+	195.087	2974.6	3197.6	3013.8	6.47	6.47	6.47	0.98	0.98	0.98
49	*	ISF of Caffeine C8H10N4O2	-	110.07		8			6.47			0.81
50		Tetraethylene glycol [M+H]+ C8H18O5 NIST 1065723	M+H 1+	195.122	33.3	34.1	32.6	4.84	4.84	4.84	0.96	0.96	0.94
51		Tetraethylene glycol [M+H]+ C8H18O5 NIST 1065722	M+H 1+	195.122	36.3			12.91			0.51
52		NCGC00015088-09_C12H14N2O_N-[2-(1H-Indol-3-yl)ethyl]acetamide C12H14N2O	M+H 1+	203.117			16.8			8.47			0.89
53	*	3-Acetamidocoumarin [M+H]+ C11H9NO3 NIST 1227441	M+H 1+	204.065	250.1	250.7	253.2	2.33	2.32	2.33	0.71	0.72	0.69
53	*	ISF of 3-Acetamidocoumarin [M+H]+ C11H9NO3 NIST 1227441	-	162.054	25	24	23.4	2.33	2.32	2.33	0.81	0.75	0.81
54	*	ISF of Indole-3-pyruvic acid [M+H]+ C11H9NO3 NIST 1076784---Indole-3-pyruvic acid [M+H]+ C11H9NO3 NIST 1076786	-	176.07	25.7	26.3	26.7	3.44	3.43	3.44	0.92	0.9	0.89
54	*	Indole-3-pyruvic acid [M+H]+ C11H9NO3 NIST 1076784---Indole-3-pyruvic acid [M+H]+ C11H9NO3 NIST 1076786	M+H 1+	204.065	29.3	30	29.7	3.44	3.43	3.44	0.8	0.74	0.78
55		Acetyl-L-carnitine [2M+H]+ C9H17NO4 NIST 1057145---Acetyl-L-carnitine [M+H]+ C9H17NO4 NIST 1057124	M+H 1+	204.123	4989.3	5305	5098.6	1.1	1.1	1.1	0.98	0.98	0.98
56	*	ISF of L-Kynurenine [M+H]+ C10H12N2O3 NIST 1057511---Kynurenine C10H12N2O3	-	192.065	23.4	22.8	25.8	2.83	2.85	2.84	0.85	0.86	0.85
56	*	Kynurenine C10H12N2O3---L-Kynurenine [M+H]+ C10H12N2O3 NIST 1057511	M+H 1+	209.092	19.3	17.9	19.7	2.83	2.83	2.84	0.95	0.92	0.91
57		Citric acid [M+H]+ C6H8O7 NIST 1058881---Citric acid [M+H]+ C6H8O7 NIST 1058882	M+NH4 1+	210.06	47.1	51.7	44.7	14.93	14.82	14.94	0.83	0.84	0.84
58	*	Harmaline [M+H]+ C13H14N2O NIST 1072698	M+H 1+	215.117			20.6			8.26			0.62
58	*	ISF of Harmaline [M+H]+ C13H14N2O NIST 1072698	-	159.067			177.3			8.26			0.68
58	*	ISF of Harmaline [M+H]+ C13H14N2O NIST 1072698	-	174.091			8004.4			8.26			0.82
59	*	ISF of Pantothenic acid [M+H]+ C9H17NO5 NIST 1055164	-	184.096	85.8	79.2	81.1	1.84	1.84	1.83	0.52	0.61	0.57
59	*	ISF of Pantothenic acid [M+H]+ C9H17NO5 NIST 1055164	-	202.107	169.7	162.5	163.6	1.84	1.84	1.83	0.81	0.89	0.82
59	*	Pantothenic acid [M+H]+ C9H17NO5 NIST 1055164	M+H 1+	220.118	1455.6	1434.1	1452.9	1.84	1.84	1.83	0.93	0.92	0.93
60		2-(4-Morpholinyl)benzothiazole C11H12N2OS	M+H 1+	221.077			23.5			10.29			0.88
61		Cyclotrisiloxane, hexamethyl- [M+H]+ C6H18O3Si3 NIST 1152944	M+H 1+	223.063	109.5,166.1	96.9,157.5	93.9,153.3	12.10,10.95	12.09,10.93	12.09,10.94	0.82,0.89	0.84,0.89	0.82,0.87
62	*	Diethyl phthalic acid C12H14O4 MoNA 444674	M+H 1+	223.096	13.5	16.2	14.1	10.76	10.75	10.75	0.93	0.91	0.92
62	*	ISF of Diethyl phthalic acid C12H14O4 MoNA 444674	-	149.023	596.9	585.4	563.5	10.76	10.75	10.75	0.88	0.86	0.85
63	*	Diethyl phthalate [M+H]+ C12H14O4 NIST 1153018---Diethyl phthalate [M+H]+ C12H14O4 NIST 1153022	M+H 1+	223.096	29.5,22.6	74.8	22.8,28.7	12.65,12.93	12.73	12.94,12.66	0.63,0.65	0.56	0.61,0.64
63	*	ISF of Diethyl phthalate [M+H]+ C12H14O4 NIST 1153022---Diethyl phthalate [M+H]+ C12H14O4 NIST 1153018	-	149.023	2490.6		2521.7	12.68		12.68	0.91		0.96
63	*	ISF of Diethyl phthalate [M+H]+ C12H14O4 NIST 1153022---Diethyl phthalate [M+H]+ C12H14O4 NIST 1153018	-	121.027	40.6			12.68			0.98
64		2-Hydroxychalcone [M+H]+ C15H12O2 NIST 1227492	M+H 1+	225.091	18.3	60.4	20.9	11.55	11.57	11.54	0.58	0.53	0.58
65	*	ISF of L-Carnosine [M+H]+ C9H14N4O3 NIST 1057303---Carnosine C9H14N4O3 MassBank 2616	-	110.07	180.2	189.1	181.7	1.06	1.06	1.06	0.76	0.8	0.78
65	*	ISF of L-Carnosine [M+H]+ C9H14N4O3 NIST 1057303---Carnosine C9H14N4O3 MassBank 2616	-	156.076	234.8	251.6	241	1.06	1.06	1.06	0.87	0.89	0.89
65	*	Carnosine C9H14N4O3 MassBank 2616---L-Carnosine [M+H]+ C9H14N4O3 NIST 1057303	M+H 1+	227.113	84	85.7	84.9	1.03	1.03	1.03	0.99	0.99	0.99
66	*	ISF of Melatonin C13H16N2O2 MoNA 449485---Melatonin C13H16N2O2	-	159.067	162.2	175.9	177.3	8.27	8.28	8.26	0.84	0.82	0.81
66	*	ISF of Melatonin C13H16N2O2 MoNA 449485---Melatonin C13H16N2O2	-	174.091	7394.3	8296.5	8004.4	8.27	8.28	8.26	0.92	0.92	0.94
66	*	Melatonin C13H16N2O2---Melatonin C13H16N2O2 MoNA 449485	M+H 1+	233.128	9584.6	10334.5	10004.9	8.27	8.28	8.26	0.96	0.96	0.96
67		Anserine C10H16N4O3 MoNA 448174---L-Anserine; LC-ESI-QTOF; MS2; CE C10H16N4O3	M+H 1+	241.129	400.2	427.7	399.4	1.08	1.08	1.08	0.98	0.97	0.98
68	*	ISF of Thymidine [2M+H]+ C10H14N2O5 NIST 1074856---Thymidine [M+H]+ C10H14N2O5 NIST 1074833	-	127.049	694.4	716.1	720.2	4.23	4.23	4.23	0.85	0.87	0.85
68	*	Thymidine [2M+H]+ C10H14N2O5 NIST 1074856---Thymidine [M+H]+ C10H14N2O5 NIST 1074833	M+H 1+	243.097	215.1	209.6	202.7	4.23	4.23	4.23	0.97	0.98	0.98
69	*	Cytarabine C9H13N3O5---Cytidine [M+H]+ C9H13N3O5 NIST 1070253---Cytidine [M+H]+ C9H13N3O5 NIST 1070254	M+H 1+	244.094	157.9	139.6	149.8	1.55	1.56	1.56	0.99	0.99	0.99
69	*	ISF of Cytidine [M+H]+ C9H13N3O5 NIST 1070254---Cytidine [M+H]+ C9H13N3O5 NIST 1070253---Cytarabine C9H13N3O5	-	112.05	96.8	89.7	96.1	1.55	1.56	1.56	0.78	0.82	0.88
70	*	ISF of Uridine [M+H]+ C9H12N2O6 NIST 1070924---Uridine [M+H]+ C9H12N2O6 NIST 1070916	-	113.034	227.8	221.1	224.6	1.81	1.81	1.81	0.85	0.83	0.83
70	*	Uridine [M+H]+ C9H12N2O6 NIST 1070916---Uridine [M+H]+ C9H12N2O6 NIST 1070924	M+H 1+	245.076	71.7	75.1	71.6	1.81	1.81	1.81	0.98	0.98	0.97
71	*	Biotin [2M+H]+ C10H16N2O3S NIST 1057664---Biotin [2M+H]+ C10H16N2O3S NIST 1057665	M+H 1+	245.095	7870.3	7693.8	8244.5	4.39	4.39	4.39	1	1	1
71	*	ISF of Biotin [2M+H]+ C10H16N2O3S NIST 1057664---Biotin [2M+H]+ C10H16N2O3S NIST 1057665	-	227.085	3229.4	3136.7	3380.7	4.39	4.39	4.39	0.98	0.98	1
72		6-Hydroxymelatonin [M+H]+ C13H16N2O3 NIST 1167013---6-Hydroxymelatonin [M+H]+ C13H16N2O3 NIST 1167014	M+H 1+	249.123	63	64.3	59.7,64.5	7.39	7.39	7.11,7.39	0.57	0.62	0.51,0.58
73		Tri(propylene glycol) butyl ether [M+H]+ C13H28O4 NIST 1110759---Tri(propylene glycol) butyl ether [M+H]+ C13H28O4 NIST 1110761	M+H 1+	249.206	23.4	19.2		11.2	11.19		0.83	0.86
74		Melatonin C13H16N2O2 MoNA 450591	M+NH4 1+	250.154	30.4		27	8.27		8.26	0.96		0.96
75		Diphenyl phosphate C12H11O4P	M+H 1+	251.046	894	865.3	859	11.41	11.41	11.41	0.7	0.82	0.82
76		Adenosine, 2'-deoxy- [M+H]+ C10H13N5O3 NIST 1070962	M+H 1+	252.109	11.7	12.9	12.3	4.75	4.74	4.73	0.87	0.88	0.85
77		Palmitamide [M+H]+ C16H33NO NIST 1192369	M+H 1+	256.263		239.2			13.71			0.61
78		Dibutyl adipate [M+H]+ C14H26O4 NIST 1186310---Dibutyl adipate [M+H]+ C14H26O4 NIST 1186312	M+H 1+	259.19	1367.7	1328.4	1297.2	13.46	13.44	13.44	0.58	0.63	0.76
79	*	D-Glucose 6-phosphate [2M+H]+ C6H13O9P NIST 1178337---D-Glucose 6-phosphate [2M+H]+ C6H13O9P NIST 1178338---D-Glucose 6-phosphate [2M+H]+ C6H13O9P NIST 1178339	M+H 1+	261.036	77.6	78	83.8	0.94	0.94	0.94	0.96	0.95	0.96
79	*	ISF of D-Glucose 6-phosphate [2M+H]+ C6H13O9P NIST 1178337---D-Glucose 6-phosphate [2M+H]+ C6H13O9P NIST 1178339---D-Glucose 6-phosphate [2M+H]+ C6H13O9P NIST 1178338	-	127.038	73.4	69.4	70.6	0.96	0.94	0.94	0.54	0.69	0.56
80		Indarubicin C16H10N2O2	M+H 1+	263.081	23.1	29.3	25.8	11.13	11.16	11.15	0.67	0.79	0.74
81	*	ISF of N-gamma-Acetyl-N-2-formyl-5-methoxykynurenamine C13H16N2O4	-	178.085	19.9	24.9	20.3	7.68	7.7	7.69	0.8	0.86	0.77
81	*	N-gamma-Acetyl-N-2-formyl-5-methoxykynurenamine C13H16N2O4	M+H 1+	265.118	44.4	50.5	53.4	7.68	7.67	7.67	0.98	0.96	0.97
82		(+)-2,5-epi-Goniothalesdiol [M+H-H2O]+ C14H18O5 NIST 1141005	M+H 1+	267.122	29.4	32.4	28.4	11.89	11.89	11.88	0.53	0.54	0.56
83		Tributyl phosphate [M+H]+ C12H27O4P NIST 1147659---Tributyl phosphate [M+H]+ C12H27O4P NIST 1147661	M+H 1+	267.172	70.8	75.3	67.7	12.49	12.48	12.48	0.97	0.98	0.98
84	*	Adenosine C10H13N5O4	M+H 1+	268.104	3538.7	3512.3	3612.9	4.57	4.57	4.57	0.99	0.99	0.99
84	*	ISF of Adenosine C10H13N5O4	-	136.061	358.4	365.7	325.4	4.57	4.57	4.55	0.88	0.89	0.86
85		Homocystine C8H16N2O4S2	M+H 1+	269.062		31.9			1.06			0.9
86	*	ISF of Inosine [M+H]+ C10H12N4O5 NIST 1070306	-	137.045	496.9	482.4	492.5	2.88	2.88	2.89	0.92	0.92	0.91
86	*	Inosine [M+H]+ C10H12N4O5 NIST 1070306	M+H 1+	269.088	155.5	153.2	155.7	2.88	2.88	2.89	0.99	0.99	0.99
87		Melatonin C13H16N2O2 MoNA 449491	M+K 1+	271.084	51.5		46.2	8.27		8.26	0.91		0.92
88		Galaxolidone; LC-ESI-ITFT; MS2; CE C18H24O2	M+H 1+	273.184	102.5	113.6	103.8	12.75	12.75	12.73	0.96	0.95	0.95
89		Triphenylphosphine oxid; LC-ESI-ITFT; MS2; CE C18H15OP	M+H 1+	279.093	660.3	661.9	659.7	10.83	10.84	10.85	0.58	0.68	0.66
90	*	Dibutyl phthalate C16H22O4 MoNA 444664---Dibutyl phthalate C16H22O4 MoNA 449139	M+H 1+	279.159	453.4	411.9	388.4	13.31	13.3	13.3	0.78	0.78	0.78
90	*	ISF of Dibutyl phthalate C16H22O4 MoNA 449139---Dibutyl phthalate C16H22O4 MoNA 444664	-	149.023	931.4	949.1	929.9	13.31	13.3	13.3	0.91	0.9	0.89
91	*	Dibutyl phthalate C16H22O4 MoNA 444665	M+H 1+	279.159	886.6	865.5	855	12.68	12.66	12.68	0.96	0.96	0.96
91	*	ISF of Dibutyl phthalate C16H22O4 MoNA 444665	-	149.023	2490.6	2801.8	2521.7	12.68	12.66	12.68	0.79	0.8	0.81
92		4,5-Dichloro-2-n-octyl-3(2H)-isothiazolone (DCOIT); LC-ESI-ITFT; MS2; CE C11H17Cl2NOS	M+H 1+	282.048	243.3			12.98			0.92
93	*	1-Methyladenosine [M+H]+ C11H15N5O4 NIST 1069873	M+H 1+	282.119	5105.9	5325.5	4930.5	1.88	1.9	1.9	0.99	0.99	0.99
93	*	ISF of 1-Methyladenosine [M+H]+ C11H15N5O4 NIST 1069873	-	150.077	738	785	741.5	1.88	1.9	1.9	0.95	0.96	0.96
94	*	ISF of N6-Methyladenosine C11H15N5O4	-	150.077	1134.4	1091.4	1100	5.73	5.73	5.72	0.91	0.92	0.91
94	*	N6-Methyladenosine C11H15N5O4	M+H 1+	282.12	19868.6	19750.9	19165.8	5.73	5.73	5.72	0.99	0.99	0.99
95		D-Glucose 6-phosphate [M+Na]+ C6H13O9P NIST 1178397---D-Mannose 6-phosphate [M+Na]+ C6H13O9P NIST 1068200	M+Na 1+	283.019	410.8	434.7	430.8	0.94	0.94	0.94	0.86	0.89	0.94
96		Hexaethylene glycol [M+H]+ C12H26O7 NIST 1186835	M+H 1+	283.175	206.2		203.9	6.33		6.33	0.53		0.58
97	*	Guanosine [M+H]+ C10H13N5O5 NIST 1070281	M+H 1+	284.099	1052.1	1034.4	1004.4	3	3.01	3	0.99	0.99	0.99
97	*	ISF of Guanosine [M+H]+ C10H13N5O5 NIST 1070281	-	152.056	1791.8	1788	1765.3	3	3.01	3	0.88	0.87	0.91
98		Lauryl diethanolamide C16H33NO3	M+H 1+	288.253	28.1	27	28	12.26	12.26	12.26	0.77	0.8	0.78
99		C17-Sphinganine C17H37NO2	M+H 1+	288.289			25.2			12.41			0.65
100		OPHTHALMIC ACID C11H19N3O6	M+H 1+	290.134	474.1	486	476.1	1.1	1.1	1.1	0.84	0.83	0.83
101	*	5'-Methylthioadenosine C11H15N5O3S---Adenosine, 5'-S-methyl-5'-thio- [M+H]+ C11H15N5O3S NIST 1061258	M+H 1+	298.097	5592.2	4936.4	5271.9	6.72	6.72	6.73	0.99	0.98	0.98
101	*	ISF of 5'-Methylthioadenosine C11H15N5O3S---Adenosine, 5'-S-methyl-5'-thio- [M+H]+ C11H15N5O3S NIST 1061258	-	136.061	457	417.4	432	6.72	6.72	6.73	0.87	0.87	0.85
102		Hexaethylene glycol [M+H]+ C12H26O7 NIST 1186832	M+NH4 1+	300.201	45.6	47.4	44.9	6.33	6.33	6.33	0.87	0.84	0.87
103		Dibutyl phthalate C16H22O4 MoNA 449140	M+Na 1+	301.141	532.9			12.68			0.59
104		Adrenosterone [M+H]+ C19H24O3 NIST 1057604	M+H 1+	301.179		10.1			10.05			0.71
105		NCGC00169419-02_C20H28O2_(5xi)-Abieta-8,11,13-trien-18-oic acid C20H28O2	M+H 1+	301.215			58.4			13.06			0.63
106		D-erythro-Sphinganine [M+H]+ C18H39NO2 NIST 1063620---Dihydrosphingosine C18H39NO2	M+H 1+	302.305	35.1	36.5	33.7	13.07	13.06	13.06	0.94	0.91	0.83
107		D-erythro-Sphinganine [M+H-H2O]+ C18H39NO2 NIST 1221200	M+H 1+	302.305	44	41.4		12.65	12.64		0.51	0.58
108		19-Hydroxyandrost-4-ene-3,17-dione [M+H-H2O]+ C19H26O3 NIST 1170400---Formestane [M+H-H2O]+ C19H26O3 NIST 1200460---Formestane [M+H-H2O]+ C19H26O3 NIST 1200461	M+H 1+	303.195	27.6	23.9	24.2	10.28	10.27	10.27	0.62	0.65	0.68
109		Cytidine 2',3'-cyclic monophosphoric acid [2M+H]+ C9H12N3O7P NIST 1159572---Cytidine 2',3'-cyclic monophosphoric acid [2M+H]+ C9H12N3O7P NIST 1159573	M+H 1+	306.048	171	177.7	176.3	1.08	1.08	1.08	0.96	0.96	0.96
110		Pentapropylene glycol [M+H]+ C15H32O6 NIST 1110776---Pentapropylene glycol [M+H]+ C15H32O6 NIST 1110777	M+H 1+	309.225	85.1	88.7	88.1	9.37	9.39	9.39	0.56	0.8	0.64
111		Benzyl butyl phthalate C19H20O4	M+H 1+	313.143	367.2	382.4	345.8	12.56	12.57	12.55	0.97	0.97	0.98
112		Unknown (carbon number 11); PlaSMA ID-1663 C11H15N5O4S	M+H 1+	314.091		65			4.43			0.5
113		Thymidine 5'-monophosphate [M+H]+ C10H15N2O8P NIST 1062687---Thymidine??5'-monophosphate C10H15N2O8P	M+H 1+	323.063	44	39.1	43.1	1.55	1.56	1.56	0.96	0.97	0.96
114		Unknown (carbon number 16); PlaSMA ID-1728 C16H22N2O5	M+H 1+	323.16	85.2	81.6,17.6	8.3,80.3	6.68	6.68,6.25	5.63,6.68	0.74	0.71,0.81	0.70,0.71
115	*	ISF of Uridine 5'-monophosphate [M+H]+ C9H13N2O9P NIST 1063059---Uridine 5'-monophosphate [M+H]+ C9H13N2O9P NIST 1063060	-	97.0275	33.6			1.01			0.72
115	*	Uridine 5'-monophosphate [M+H]+ C9H13N2O9P NIST 1063059---Uridine 5'-monophosphate [M+H]+ C9H13N2O9P NIST 1063060	M+H 1+	325.043	234.3	241.3	241.3	1.01	1.01	1.01	0.99	0.98	0.98
116		Tris(1-chloro-2-propyl)phosphate C9H18Cl3O4P	M+H 1+	327.008	397	390.6	418.2	11.25	11.26	11.26	0.97	0.97	0.97
117		Triphenylphosphate C18H15O4P	M+H 1+	327.078	341.6	365.5	312.2	12.14	12.16	12.16	0.71	0.73	0.74
118		Adenosine 2',3'-cyclic monophosphate [M+H]+ C10H12N5O6P NIST 1064291---Adenosine 3',5'-cyclic monophosphate C10H12N5O6P	M+H 1+	330.06	1025.3	1055.6	1018	4.43	4.43	4.44	0.96	0.96	0.97
119	*	7-Diethylamino-3-(4-methoxyphenyl)coumarin [M+H]+ C20H21NO3 NIST 1157882	M+Li 1+	330.165			7.9			3.02			0.64
119	*	ISF of Sinomenine C19H23NO4	-	152.056		1788	1765.3		3.01	3		0.72	0.75
119	*	Sinomenine C19H23NO4	M+H 1+	330.165	7.8	9		3.05	3.04		0.61	0.57
120		11.beta.-Hydroxyprogesterone [M+H]+ C21H30O3 NIST 1185173	M+H 1+	331.226			36.1			11.17			0.59
121		9-Oxo-15S-hydroxy-5Z,10Z,13E,17Z-prostatetraenoic acid [M+H-H2O]+ C20H28O4 NIST 1131822	M+H 1+	333.205		28.2			10.16			0.55
122		Benzyl butyl phthalate C19H20O4	M+Na 1+	335.125	136.4	140.2	127.8	12.56	12.57	12.55	0.6	0.62	0.77
123	*	13-Docosenamide, (Z)- [M+H]+ C22H43NO NIST 1152869---Erucamide C22H43NO	M+H 1+	338.341	314.5	974.9	942.1	14.04	14.05	14.03	0.79	0.9	0.82
123	*	ISF of 13-Docosenamide, (Z)- [M+H]+ C22H43NO NIST 1152869---Erucamide C22H43NO	-	321.315		30.7			14.05			0.63
124		Tris(1-chloro-2-propyl)phosphate C9H18Cl3O4P	M+NH4 1+	344.034			12			3			0.61
125	*	ISF of Lauroyl L-carnitine [M+H]+ C19H37NO4 NIST 1152316	-	285.206		98.8			11.77			0.77
125	*	Lauroyl L-carnitine [M+H]+ C19H37NO4 NIST 1152316	M+H 1+	344.28	31784.9	30963.8	30613.8	11.78	11.77	11.77	0.98	0.98	0.98
126		Thymidine 5'-monophosphate [M+Na]+ C10H15N2O8P NIST 1062716---Thymidine 5'-monophosphate [M+Na]+ C10H15N2O8P NIST 1062717---Thymidine 5'-monophosphate [M+Na]+ C10H15N2O8P NIST 1178955	M+Na 1+	345.045	35.2	32.8	33.7	1.55	1.56	1.56	0.69	0.66	0.65
127		Uridine 5'-monophosphate [M+Na]+ C9H13N2O9P NIST 1063088---Uridine 5'-monophosphate [M+Na]+ C9H13N2O9P NIST 1173786	M+Na 1+	347.025	164.4	168.4	171.9	0.99	0.99	0.99	0.9	0.96	0.97
128	*	Corticosterone [M+H]+ C21H30O4 NIST 1056058	M+H 1+	347.222	11550.8	11497.7	11776	10.39	10.4	10.39	0.97	0.98	0.97
128	*	ISF of Corticosterone [M+H]+ C21H30O4 NIST 1056058	-	311.2	83.3	76.9	78.2	10.39	10.4	10.39	0.79	0.74	0.75
128	*	ISF of Corticosterone [M+H]+ C21H30O4 NIST 1056058	-	329.211	285.5	273.5	264.7	10.39	10.4	10.39	0.77	0.79	0.79
129		3'-AMP C10H14N5O7P MoNA 447305---Adenosine 3'-monophosphate; LC-ESI-QTOF; MS2; CE C10H14N5O7P---Adenosine 5'-monophosphate [M+H]+ C10H14N5O7P NIST 1161701	M+H 1+	348.07	104.5	123.7	183.5	1.3	1.3	1.33	0.78	0.78	0.85
130		Adenosine-3-monophosphate C10H14N5O7P	M+H 1+	348.07	664.6	651.4	669.9	1.53	1.54	1.54	0.99	0.99	0.98
131		Tris(1-chloro-2-propyl)phosphate C9H18Cl3O4P	M+Na 1+	348.989			14			11.26			0.66
132		Benzyltriphenylphosphonium cation [Cat]+ C25H22P NIST 1153268---Benzyltriphenylphosphonium cation [Cat]+ C25H22P NIST 1153269---Benzyltriphenylphosphonium cation [Cat]+ C25H22P NIST 1153283	M 1+	353.145	11.4	12.8	11.7	10.01	10.03	10.02	0.73	0.67	0.73
133		D-Turanose [M+H-H2O]+ C12H22O11 NIST 1076205	M+NH4 1+	360.149	155.8			1.06			0.98
134		Cortisone C21H28O5 MoNA 443906---Cortisone [M+H]+ C21H28O5 NIST 1060547	M+H 1+	361.201	627	615.4	629.8	9.6	9.6	9.59	0.99	0.99	0.95
135		Cortisol C21H30O5 MoNA 443923	M+H 1+	363.216	75.9	12.7		9.47	9.21		0.87	0.68
136		Hydrocortisone [M+H]+ C21H30O5 NIST 1056077	M+H 1+	363.216	24.2			8.54			0.57
137	*	Hydrocortisone [M+H]+ C21H30O5 NIST 1056073---Hydrocortisone; LC-ESI-QTOF; MS2; CE C21H30O5	M+H 1+	363.217	12638	12978.8	12541.7	9.72	9.72	9.73	0.94	0.94	0.94
137	*	ISF of Hydrocortisone; LC-ESI-QTOF; MS2; CE C21H30O5---Hydrocortisone [M+H]+ C21H30O5 NIST 1056073	-	309.185	59.4	57.9	57.9	9.72	9.72	9.73	0.74	0.72	0.71
137	*	ISF of Hydrocortisone; LC-ESI-QTOF; MS2; CE C21H30O5---Hydrocortisone [M+H]+ C21H30O5 NIST 1056073	-	345.206	102.8	109.1	96	9.72	9.72	9.73	0.68	0.72	0.66
137	*	ISF of Hydrocortisone; LC-ESI-QTOF; MS2; CE C21H30O5---Hydrocortisone [M+H]+ C21H30O5 NIST 1056073	-	327.195		124.8	118.5		9.72	9.73		0.6	0.59
138		Hydrocortisone [M+H]+ C21H30O5 NIST 1056074	M+H 1+	363.216	13.2		12.2	9.24		9.22	0.63		0.54
139		Guanosine 5'-monophosphate [M+H]+ C10H14N5O8P NIST 1055921---Guanosine monophosphate C10H14N5O8P MassBank 5251	M+H 1+	364.065	153.3	137	138.4	1.1	1.08	1.08	0.96	0.95	0.96
140		Sucrose [M+Na]+ C12H22O11 NIST 1069693---Sucrose [M+Na]+ C12H22O11 NIST 1069694	M+Na 1+	365.105	599	655.3	606.8	1.08	1.08	1.08	0.95	0.93	0.95
141		Adenosine 5'-monophosphate [M+Na]+ C10H14N5O7P NIST 1161738	M+Na 1+	370.051		69.2	66.1		1.54	1.54		0.91	0.88
142		6-Ketoprostaglandin F1.alpha. [M+H-H2O]+ C20H34O6 NIST 1215549	M+H 1+	371.238			30.8			12.53			0.56
143		Hexanedioic acid, bis(2-ethylhexyl) ester [M+H]+ C22H42O4 NIST 1152991	M+H 1+	371.316	10983.3	10277.7	10371.6	13.46	13.44	13.44	0.97	0.97	0.98
144		Hydroxyprogesterone acetate [M+H]+ C23H32O4 NIST 1201047	M+H 1+	373.237	25.7			11.84			0.58
145		Riboflavin C17H20N4O6	M+H 1+	377.145	1777.7	1679.6	1723.2	7.09	7.11	7.11	0.92	0.92	0.92
146		Hexapropylene glycol [M+H]+ C18H38O7 NIST 1110789	M+NH4 1+	384.294	24.4	44.3		11.18	10.16		0.64	0.95
147		Hexapropylene glycol [M+H]+ C18H38O7 NIST 1110790	M+NH4 1+	384.295	40		41	10.19		10.16	0.91		0.94
148	*	ISF of S-Adenosyl-homocysteine C14H20N6O5S	-	136.061	38.2		38.4	3.99		3.97	0.6		0.66
148	*	S-Adenosyl-homocysteine C14H20N6O5S	M+H 1+	385.129	1910.7	1818.3	1698.6	3.99	3.98	3.97	0.99	0.99	0.99
149		Hexanedioic acid, bis(2-ethylhexyl) ester [M+H]+ C22H42O4 NIST 1152990	M+NH4 1+	388.342			342.5			13.44			0.96
150	*	Dioctyl Phthalate C24H38O4	M+H 1+	391.284	2151.4	2107.6	2076	13.31	13.3	13.3	0.97	0.97	0.97
150	*	ISF of Dioctyl Phthalate C24H38O4	-	149.023	931.4	949.1	929.9	13.31	13.3	13.3	0.73	0.78	0.78
151		Lys-Thr-Lys [M+H]+ C16H33N5O5 NIST 1093949	M+NH4 1+	393.286	262.8			11.27			0.54
152		MLS000028461-01!URSODEOXYCHOLIC ACID C24H40O4	M+H 1+	393.297		1970.4			13.46			0.52
153		(-)-Riboflavin [M+Na]+ C17H20N4O6 NIST 1060229---(-)-Riboflavin [M+Na]+ C17H20N4O6 NIST 1060230	M+Na 1+	399.127	280.8	272.3	267.7	7.09	7.11	7.11	0.94	0.95	0.91
154		Tris(2-butoxyethyl) phosphate [M+H]+ C18H39O7P NIST 1147566	M+H 1+	399.25	350.7	341.6	346.9	12.84	12.82	12.83	0.91	0.86	0.86
155		MLS001333092-01!5-Cholesten-3beta-ol-7-one566-28-9 C27H44O2	M+H 1+	401.342		49.6			13.66			0.54
156		Uridine 5_-(trihydrogen diphosphate) C9H14N2O12P2	M+H 1+	405.009	203.9	210.4	213	0.94	0.94	0.94	0.9	0.93	0.89
157		Hydrocortisone 21-acetate [M+H]+ C23H32O6 NIST 1067363---Hydrocortisone 21-acetate [M+H]+ C23H32O6 NIST 1067364	M+H 1+	405.228	15.4		13.1	10.6		10.59	0.59		0.7
158		Unknown (carbon number 27); PlaSMA ID-2145 C27H22N2O	M+NH4 1+	408.222	10.9			7.99			0.5
159		Deoxycholic acid [2M+H]+ C24H40O4 NIST 1067707---Ursodeoxycholic acid [M+H-H2O]+ C24H40O4 NIST 1127572	M+NH4 1+	410.326	39.8	46.2	40.4	12.51	12.5	12.51	0.92	0.92	0.87
160		Dioctyl phthalate [M+Na]+ C24H38O4 NIST 1153083	M+Na 1+	413.266	777.2	789.7	755.4	13.31	13.3	13.3	0.91	0.95	0.9
161		NCGC00180384-03_C22H32O6_(1S,2R,4aR,8aR)-1-Acetoxy-7-isopropylidene-1,4a-dimethyl-6-oxodecahydro-2-naphthalenyl 2,3-dimethyl-2-oxiranecarboxylate C22H32O6	M+Na 1+	415.211	120.9,6120.6	122.1,6304.5	119.9,6582.9	11.39,11.73	11.41,11.73	11.41,11.72	0.93,0.93	0.86,0.93	0.86,0.93
162		Prostaglandin D2 ethanolamide [M+Na]+ C22H37NO5 NIST 1106844---Prostaglandin D2 ethanolamide [M+Na]+ C22H37NO5 NIST 1106845	M+Na 1+	418.258	24.1	25	23	8.13	8.12	8.1	0.56	0.61	0.59
163		Dioctyl sebacate [M+H]+ C26H50O4 NIST 1186621	M+H 1+	427.377	2584.4		1649.3	13.19		13.25	0.51		0.54
164		Adenosine 5'-diphosphate [M+H]+ C10H15N5O10P2 NIST 1161608	M+H 1+	428.036			138.7			1.38			0.86
165		Tris(1,3-dichlorisopropyl)phosphate (TDCPP) C9H15Cl6O4P	M+H 1+	428.89	61.8		64.4	12.03		12.02	0.66		0.73
166		Heptapropylene glycol [M+H]+ C21H44O8 NIST 1110806	M+NH4 1+	442.337	69.6	64	60.1	10.83	10.82	10.82	0.92	0.88	0.87
167		NCGC00169629-02_C27H28N2O4_Benzenepropanamide, N-[2-(acetyloxy)-1-(phenylmethyl)ethyl]-alpha-(benzoylamino)- C27H28N2O4	M+H 1+	445.212			17.9			11.51			0.5
168		Cytidine 5'-diphosphocholine [M+H]+ C14H26N4O11P2 NIST 1068234---Cytidine 5'-diphosphocholine [M+H]+ C14H26N4O11P2 NIST 1068235	M+H 1+	489.114	209	205.1	202.8	0.99	0.99	0.99	0.96	0.97	0.96
169		Octapropylene glycol [M+H]+ C24H50O9 NIST 1110821	M+NH4 1+	500.377			61.6			12.32			0.57
170		Octapropylene glycol [M+H]+ C24H50O9 NIST 1110820---Octapropylene glycol [M+H]+ C24H50O9 NIST 1110822	M+NH4 1+	500.378	56	57.4	53.5	11.36	11.38	11.36	0.9	0.91	0.94
171		Nonapropylene glycol [M+H]+ C27H56O10 NIST 1110836---Nonapropylene glycol [M+H]+ C27H56O10 NIST 1110838	M+NH4 1+	558.421	29.7	31.8		11.82	11.82		0.53	0.74
172		Adenosine 5'-diphosphoribose [M+H]+ C15H23N5O14P2 NIST 1068202---Adenosine 5'-diphosphoribose [M+H]+ C15H23N5O14P2 NIST 1161394	M+H 1+	560.078	91.8	97.3	91.7	1.08	1.08	1.08	0.97	0.93	0.97
173		Puberanidine C30H42N2O7	M+NH4 1+	560.327	34.4		36.4	7.78		7.78	0.79		0.74
174		Cyclic adenosine diphosphate ribose [M+Na]+ C15H21N5O13P2 NIST 1173112	M+Na 1+	564.048		22.8			1.88			0.75
175		Uridine 5'-diphosphogalactose [M+Na]+ C15H24N2O17P2 NIST 1063169	M+Na 1+	589.043	79.7	84.7		0.96	0.96		0.97	0.96
176		Uridine-5-diphosphoacetylgalactosamine C17H27N3O17P2	M+H 1+	608.088	116.8	115.6	116.2	0.96	0.96	0.96	0.89	0.93	0.94
177		NCGC00385199-01!2-[3,4-bis[[(2S,3R,4S,5S,6R)-3,4,5-trihydroxy-6-(hydroxymethyl)oxan-2-yl]oxy]phenyl]-5,7-dihydroxychromen-4-one C27H30O16	M+NH4 1+	628.194	28.8		35	14.2		14.2	0.58		0.58
178		3,3',5-Triiodo-L-thyronine [M+H]+ C15H12I3NO4 NIST 1073680---3,3',5-Triiodo-L-thyronine [M+H]+ C15H12I3NO4 NIST 1073683	M+H 1+	651.797	45.5	43.2	42.8	9.99	9.98	9.97	0.97	0.94	0.91
179	*	.beta.-Nicotinamide adenine dinucleotide [M+H]+ C21H27N7O14P2 NIST 1066928	M+H 1+	664.117	976.1	968.7	931.8	1.88	1.88	1.88	0.94	0.94	0.94
179	*	ISF of .beta.-Nicotinamide adenine dinucleotide [M+H]+ C21H27N7O14P2 NIST 1066928	-	524.057	58.8	59.2	55.8	1.88	1.88	1.88	0.9	0.94	0.71
179	*	ISF of .beta.-Nicotinamide adenine dinucleotide [M+H]+ C21H27N7O14P2 NIST 1066928	-	542.068	83.1	85.3	78.2	1.88	1.88	1.88	0.93	0.97	0.94
179	*	ISF of .beta.-Nicotinamide adenine dinucleotide [M+H]+ C21H27N7O14P2 NIST 1066928	-	428.036	49.6	50.9		1.88	1.88		0.83	0.91
180		Thyroxine C15H11I4NO4 MoNA 450455	M+H 1+	777.695			15.5			10.56			0.76

## Sheet: MSDIAL-negative
																												Class	1	1	1
																												File type	Sample	Sample	Sample
																												Injection order	1	2	3
																												Batch ID	1	1	1
Alignment ID	Average Rt(min)	Average Rt(sec)	Average Mz	Metabolite name	Adduct type	Post curation result	Fill %	MS/MS assigned	Reference RT	Reference m/z	Formula	Ontology	INCHIKEY	SMILES	MSI level	Comment	Mannually modified	Isotope tracking parent ID	Isotope tracking weight number	Total score	RT similarity	Dot product	Reverse dot product	Fragment presence %	S/N average	Spectrum reference file name	MS1 isotopic spectrum	MS/MS spectrum	NEGIDA-1	NEGIDA-2	NEGIDA-3
0	13.322	799.32	51.0564	Unknown	[M-H]-		1	FALSE	null	null	null	null	null	null	4		FALSE	null	null	null	null	null	null	null	146.16	NEGIDA-3	51.05636:2130 52.05971:30 53.06307:10		50627	46768	55272
1	13.272	796.32	55.8087	Unknown	[M-H]-		1	FALSE	null	null	null	null	null	null	4		FALSE	null	null	null	null	null	null	null	99.1	NEGIDA-1	55.80873:1248 56.81208:27 57.81544:36		32463	20757	33093
2	13.254	795.24	56.1834	Unknown	[M-H]-		1	FALSE	null	null	null	null	null	null	4		FALSE	null	null	null	null	null	null	null	292.94	NEGIDA-1	56.18338:3292 57.18673:27 58.19009:51		134405	102893	79609
3	13.297	797.82	56.3657	Unknown	[M-H]-		1	FALSE	null	null	null	null	null	null	4		FALSE	null	null	null	null	null	null	null	186.7	NEGIDA-2	56.36571:2117 57.36906:18 58.37242:43		74540	54911	72927
4	13.35	801	56.5533	Unknown	[M-H]-		0.333	FALSE	null	null	null	null	null	null	4		FALSE	null	null	null	null	null	null	null	79.6	NEGIDA-2	56.55328:1032 57.55663:10 58.55999:36		5409	37752	4637
5	13.394	803.64	58.6242	Unknown	[M-H]-		1	FALSE	null	null	null	null	null	null	4		FALSE	null	null	null	null	null	null	null	146.4	NEGIDA-2	58.62424:1612 59.62759:41 60.63095:10		36388	39697	41678
6	14.753	885.18	59.0135	Unknown	[M-H]-		1	TRUE	null	null	null	null	null	null	4		FALSE	null	null	null	null	null	null	null	90.92	NEGIDA-1	59.01329:4278 60.01664:127 61.02:133	59.01012:12 59.01443:12 59.01551:36 59.02197:12	54405	55553	58127
7	1.353	81.18	59.9849	Unknown	[M-H]-		0.333	FALSE	null	null	null	null	null	null	4		FALSE	null	null	null	null	null	null	null	42.98	NEGIDA-2	59.98489:10021 60.98824:6639 61.9916:9464		248920	155277	181956
8	13.045	782.7	61.1209	Unknown	[M-H]-		1	FALSE	null	null	null	null	null	null	4		FALSE	null	null	null	null	null	null	null	244.58	NEGIDA-3	61.12087:3124 62.12422:19 63.12758:45		36905	122099	128613
9	13.402	804.12	61.3064	Unknown	[M-H]-		1	FALSE	null	null	null	null	null	null	4		FALSE	null	null	null	null	null	null	null	326.67	NEGIDA-1	61.30637:4607 62.30972:87 63.31308:58		138701	132780	143045
10	13.394	803.64	61.5031	Unknown	[M-H]-		1	FALSE	null	null	null	null	null	null	4		FALSE	null	null	null	null	null	null	null	175.39	NEGIDA-1	61.50309:2130 62.50644:36 63.5098:28		54079	65029	69590
11	13.383	802.98	61.6926	Unknown	[M-H]-		1	FALSE	null	null	null	null	null	null	4		FALSE	null	null	null	null	null	null	null	273.16	NEGIDA-2	61.69256:2896 62.69591:50 63.69927:10		123426	79988	103972
12	0.98	58.8	61.9881	w/o MS2:Nitric acid	[M-H]-	found in higher mz's MsMs_116; similar chromatogram in higher mz_63	1	FALSE	null	61.9884	HNO3				3		FALSE	null	null	100	null	null	null	null	26.05	NEGIDA-3	61.9881:19393 62.99145:141 63.99481:149		205472	197522	205074
13	13.419	805.14	64.0395	Unknown	[M-H]-		1	FALSE	null	null	null	null	null	null	4		FALSE	null	null	null	null	null	null	null	315.24	NEGIDA-3	64.03945:3674 65.0428:181 66.04616:64		94168	76441	103000
14	13.435	806.1	64.236	Unknown	[M-H]-		1	FALSE	null	null	null	null	null	null	4		FALSE	null	null	null	null	null	null	null	248.38	NEGIDA-3	64.23601:2284 65.23936:36 66.24272:27		60119	62001	61444
15	13.432	805.92	64.4287	Unknown	[M-H]-		0.333	FALSE	null	null	null	null	null	null	4		FALSE	null	null	null	null	null	null	null	102.74	NEGIDA-2	64.42867:1046 65.43202:52 66.43538:690		24873	29551	31199
16	13.435	806.1	66.8129	Unknown	[M-H]-		1	FALSE	null	null	null	null	null	null	4		FALSE	null	null	null	null	null	null	null	778.52	NEGIDA-2	66.81203:9340 67.81538:493 68.81874:41		264072	249422	272970
17	13.435	806.1	67.0138	Unknown	[M-H]-		1	FALSE	null	null	null	null	null	null	4		FALSE	null	null	null	null	null	null	null	459.34	NEGIDA-1	67.01382:5883 68.01717:178 69.02053:111		187139	161694	191578
18	13.435	806.1	67.2147	Unknown	[M-H]-		1	FALSE	null	null	null	null	null	null	4		FALSE	null	null	null	null	null	null	null	255.89	NEGIDA-3	67.21468:2842 68.21803:32 69.22139:27		82051	78106	82795
19	13.427	805.62	67.4059	Unknown	[M-H]-		1	FALSE	null	null	null	null	null	null	4		FALSE	null	null	null	null	null	null	null	183.94	NEGIDA-1	67.40588:1685 68.40923:28 69.41259:190		65903	48022	59630
20	1.146	68.76	68.9949	Unknown	[M-H]-		1	FALSE	null	null	null	null	null	null	4		FALSE	null	null	null	null	null	null	null	225.33	NEGIDA-1	68.99493:5347 69.99828:51 71.00164:42		41556	41415	40352
21	13.469	808.14	69.835	Unknown	[M-H]-		0.667	FALSE	null	null	null	null	null	null	4		FALSE	null	null	null	null	null	null	null	233.99	NEGIDA-3	69.83495:2388 70.8383:64 71.84166:29		64831	65293	69963
22	13.519	811.14	69.8384	Unknown	[M-H]-		0.333	FALSE	null	null	null	null	null	null	4		FALSE	null	null	null	null	null	null	null	235.05	NEGIDA-1	69.83836:2328 70.84171:92 71.84507:54		65673	11176	16381
23	13.477	808.62	70.0424	w/o MS2:1,2,3-Triazole	[M-H]-		1	FALSE	null	70.04	C2H3N3	Triazoles	QWENRTYMTSOGBR-UHFFFAOYSA-N	C1=CNN=N1	3		FALSE	null	null	97.1	null	null	null	null	133.29	NEGIDA-3	70.04239:1483 71.04574:46 72.0491:10		46073	43387	43779
24	13.485	809.1	72.7106	Unknown	[M-H]-		1	FALSE	null	null	null	null	null	null	4		FALSE	null	null	null	null	null	null	null	601.11	NEGIDA-1	72.71059:5696 73.71394:134 74.7173:10		192295	144552	177772
25	13.493	809.58	72.9164	Unknown	[M-H]-		1	FALSE	null	null	null	null	null	null	4		FALSE	null	null	null	null	null	null	null	142.74	NEGIDA-1	72.91643:3562 73.91978:41 74.92314:10		106234	96940	115633
26	13.496	809.76	73.1226	Unknown	[M-H]-		1	FALSE	null	null	null	null	null	null	4		FALSE	null	null	null	null	null	null	null	107.86	NEGIDA-1	73.12255:1599 74.1259:24 75.12926:34		56776	49596	51520
27	0.98	58.8	74.0234	w/o MS2:GLYCINE	[M-H]-	similar chromatogram in higher mz_44; found in higher mz's MsMs_44; found in higher mz's MsMs_54; similar chromatogram in higher mz_81; similar chromatogram in higher mz_64; similar chromatogram in higher mz_465; similar chromatogram in higher mz_315; similar chromatogram in higher mz_445; similar chromatogram in higher mz_130; similar chromatogram in higher mz_177; similar chromatogram in higher…	1	FALSE	null	74.0247	C2H5NO2	Alpha amino acids	DHMQDGOQFOQNFH-UHFFFAOYSA-N	NCC(O)=O	3		FALSE	null	null	99.2	null	null	null	null	114.28	NEGIDA-1	74.02345:1283 75.0268:222 76.03016:46		9403	9420	8975
28	1.38	82.8	75.0081	w/o MS2:Glycolic acid	[M-H]-		0.333	FALSE	null	75.0088	C2H4O3	Alpha hydroxy acids and derivatives	AEMRFAOFKBGASW-UHFFFAOYSA-N	O=C(O)CO	3		FALSE	null	null	99.7	null	null	null	null	48.51	NEGIDA-3	75.00806:2692 76.01141:29 77.01477:0		39525	67678	73838
29	13.54	812.4	78.7981	Unknown	[M-H]-		1	FALSE	null	null	null	null	null	null	4		FALSE	null	null	null	null	null	null	null	248.44	NEGIDA-2	78.79814:2687 79.80149:32 80.80485:10		79107	82165	76668
30	0.956	57.36	78.9588	Unknown	[M-H]-	found in higher mz's MsMs_109; found in higher mz's MsMs_474; found in higher mz's MsMs_187; found in higher mz's MsMs_290	1	TRUE	null	null	null	null	null	null	4		FALSE	null	null	null	null	null	null	null	193.43	NEGIDA-1	78.95849:4972 79.96184:507 80.9652:88	62.96452:107 78.95922:486	61032	55034	61697
31	13.526	811.56	79.0122	Unknown	[M-H]-		1	FALSE	null	null	null	null	null	null	4		FALSE	null	null	null	null	null	null	null	170.57	NEGIDA-1	79.01215:1642 80.0155:32 81.01886:78		47154	48734	57866
32	14.679	880.74	79.9564	Unknown	[M-H]-	similar chromatogram in higher mz_303	1	FALSE	null	null	null	null	null	null	4		FALSE	null	null	null	null	null	null	null	66.57	NEGIDA-2	79.95637:1385 80.95972:56 81.96308:165		14526	14414	15327
33	1.005	60.3	88.039	DL-2,3-Diaminopropionic acid	[M-H]-	similar chromatogram in higher mz_112; similar chromatogram in higher mz_185; similar chromatogram in higher mz_283; similar chromatogram in higher mz_339; similar chromatogram in higher mz_337	1	TRUE	null	88.0393	C3H8N2O2				2		FALSE	null	null	85.9	null	88	79.4	50	424.38	NEGIDA-3	88.03903:5733 89.04238:957 90.04574:98	88.03878:36 88.04009:12 88.04536:12 88.05062:12	49718	49553	50451
34	0.98	58.8	89.0229	Lactic acid	[M-H]-	found in higher mz's MsMs_116	1	TRUE	null	89.0244	C3H6O3	Alpha hydroxy acids and derivatives	JVTAAEKCZFNVCJ-UWTATZPHSA-N	C[C@@H](O)C(O)=O	2		FALSE	null	null	82.7	null	88	66.2	50	28.89	NEGIDA-2	89.02319:2944 90.02654:227 91.0299:46	89.0177:12	31763	30378	29994
35	14.654	879.24	89.0232	w/o MS2:Pyruvic acid	[M-H]-		1	FALSE	null	89.0233	C3H4O3				3		FALSE	null	null	100	null	null	null	null	21.31	NEGIDA-3	89.02321:2498 90.02656:145 91.02992:105		44541	44352	45713
36	1.598	95.88	92.024	Unknown	[M-H]-	found in higher mz's MsMs_75	0.667	FALSE	null	null	null	null	null	null	4		FALSE	null	null	null	null	null	null	null	85.09	NEGIDA-1	92.02384:1008 93.02719:111 94.03055:10		7376	6684	7461
37	14.679	880.74	96.9588	w/o MS2:Sulfuric acid	[M-H]-		1	FALSE	null	96.9601	H2O4S				3		FALSE	null	null	99.1	null	null	null	null	204.67	NEGIDA-3	96.95876:17802 97.96211:326 98.96547:2342		184192	180488	185483
38	0.932	55.92	96.9598	Unknown	[M-H]-	found in higher mz's MsMs_187; found in higher mz's MsMs_208; similar chromatogram in higher mz_407	1	FALSE	null	null	null	null	null	null	4		FALSE	null	null	null	null	null	null	null	46.12	NEGIDA-2	96.95979:5035 97.96314:88 98.9665:403		49144	58813	43168
39	1.028	61.68	98.9474	w/o MS2:Perchloric acid	[M-H]-	similar chromatogram in higher mz_95; similar chromatogram in higher mz_156; similar chromatogram in higher mz_40	1	FALSE	null	98.9491	ClHO4				3		FALSE	null	null	98.6	null	null	null	null	186.93	NEGIDA-1	98.94743:6794 99.95078:18 100.95414:4832		49116	46246	48653
40	1.028	61.68	100.945	Unknown	[M-H]-		1	FALSE	null	null	null	null	null	null	4		FALSE	null	null	null	null	null	null	null	49.77	NEGIDA-2	100.9455:2676 101.94885:19 102.95221:52		18805	18414	18353
41	14.833	889.98	102.974	Unknown	[M-H]-		1	FALSE	null	null	null	null	null	null	4		FALSE	null	null	null	null	null	null	null	1055.5	NEGIDA-1	102.97444:69697 103.97779:10 104.98115:20		950002	939006	976979
42	14.738	884.28	103.002	Malonic acid	[M-H]-		0.667	TRUE	null	103.004	C3H4O4				2		FALSE	null	null	92.7	null	88	88	100	89.83	NEGIDA-3	103.00178:1872 104.00513:97 105.00849:187	59.01355:146 102.97651:1468	21497	24894	23352
43	1.308	78.48	103.039	w/o MS2:ACETOACETATE	[M-H]-		0.667	FALSE	null	103.039	C4H6O3	Short-chain keto acids and derivatives	WDJHALXBUFZDSR-UHFFFAOYSA-N	CC(=O)CC(O)=O	3		FALSE	null	null	99.9	null	null	null	null	15.61	NEGIDA-1	103.03864:1307 104.04199:43 105.04535:14		24468	22528	25457
44	0.98	58.8	104.033	L-Serine	[M-H]-		1	TRUE	null	104.035	C3H7NO3				2	2	FALSE	null	null	96.4	null	93.7	93.7	100	109.81	NEGIDA-1	104.03452:4534 105.03787:392 106.04123:73	72.00834:10 74.02402:125 104.0362:24	31759	32760	31540
45	2.433	145.98	107.036	w/o MS2:Nicotinuric acid	[M-H]-	found in higher mz's MsMs_72	1	FALSE	null	107.037	C8H8N2O3				3		FALSE	null	null	99.6	null	null	null	null	62.46	NEGIDA-2	107.03571:1272 108.03906:95 109.04242:10		11082	10465	10394
46	1.634	98.04	108.02	Unknown	[M-H]-	similar chromatogram in higher mz_93; found in higher mz's MsMs_93; similar chromatogram in higher mz_286	1	FALSE	null	null	null	null	null	null	4		FALSE	null	null	null	null	null	null	null	261.43	NEGIDA-1	108.02016:3758 109.02351:238 110.02687:109		28073	24704	25515
47	14.869	892.14	111.008	w/o MS2:Unknown (carbon number 5); PlaSMA ID-34	[M-H]-	found in higher mz's MsMs_127; found in higher mz's MsMs_207	0.667	FALSE	1.62	111.008	C5H2O3	NA			3		FALSE	null	null	100	99.1	null	null	null	475.3	NEGIDA-2	111.00838:19828 112.01173:1139 113.01509:275		224375	232555	238262
48	1.816	108.96	111.019	Ethylphosphonic acid	[M-H]-	similar chromatogram in higher mz_133; similar chromatogram in higher mz_146; similar chromatogram in higher mz_171; similar chromatogram in higher mz_214; similar chromatogram in higher mz_230; similar chromatogram in higher mz_258; similar chromatogram in higher mz_325; similar chromatogram in higher mz_327; similar chromatogram in higher mz_415; similar chromatogram in higher mz_432; similar c…	1	TRUE	null	111.021	C2H7O3P				2		FALSE	null	null	85.4	null	88	79.9	50	102.38	NEGIDA-2	111.01872:4332 112.02207:339 113.02543:51	111.01938:12	35752	33302	36390
49	0.972	58.32	112.984	w/o MS2:Oxalic acid	[M-H]-		1	FALSE	null	112.984	C2H2O4				3		FALSE	null	null	99.9	null	null	null	null	137.24	NEGIDA-3	112.98405:5829 113.9874:232 114.99076:2075		39379	39218	40279
50	1.146	68.76	112.985	w/o MS2:Trifluoroacetic acid	[M-H]-		1	FALSE	null	112.986	C2HF3O2				3		FALSE	null	null	100	null	null	null	null	138.95	NEGIDA-1	112.98541:5956 113.98876:182 114.99212:816		47764	47283	44934
51	0.983	58.98	113.035	w/o MS2:4-Imidazolecarboxaldehyde	[M-H]-		0.333	FALSE	null	113.035	C4H4N2O				3		FALSE	null	null	100	null	null	null	null	88.16	NEGIDA-3	113.03481:1464 114.03816:611 115.04152:582		10733	11728	11066
52	0.98	58.8	114.019	w/o MS2:Maleamic acid	[M-H]-		1	FALSE	null	114.02	C4H5NO3	Straight chain fatty acids	FSQQTNAZHBEJLS-UHFFFAOYSA-N	O=C(O)C=CC(=N)O	3		FALSE	null	null	99.7	null	null	null	null	82.7	NEGIDA-1	114.01888:1238 115.02223:719 116.02559:93		9421	9468	8148
53	0.948	56.88	115.002	w/o MS2:Fumaric acid (not validated); PlaSMA ID-24	[M-H]-	found in higher mz's MsMs_68	1	FALSE	1.66	115.002	C4H4O4	Dicarboxylic acids and derivatives	VZCYOOQTPOCHFL-OWOJBTEDSA-N	O=C(O)C=CC(=O)O	3		FALSE	null	null	100	100	null	null	null	22	NEGIDA-2	115.00237:1445 116.00572:68 117.00908:139		11633	12849	11209
54	0.98	58.8	118.05	Threonine	[M-H]-		1	TRUE	null	118.051	C4H9NO3	L-alpha-amino acids	AYFVYJQAPQTCCC-UHFFFAOYNA-N	O=C(O)C(N)C(O)C	2	2	FALSE	null	null	85.8	null	75	75	100	105.35	NEGIDA-2	118.04968:2148 119.05303:310 120.05639:42	74.02189:12	15036	15648	14886
55	14.679	880.74	118.941	w/o MS2:Sulfuric acid	[M-H]-		1	FALSE	null	118.942	H2O4S				3		FALSE	null	null	99.8	null	null	null	null	41.15	NEGIDA-3	118.94143:2000 119.94478:106 120.94814:1273		19732	20426	20813
56	2.225	133.5	119.036	Purine	[M-H]-		1	TRUE	null	119.036	C5H4N4	Purines and purine derivatives	KDCGOANMDULRCW-UHFFFAOYSA-N	N=1C=NC=2NC=NC2C1	2	2	FALSE	null	null	93.2	null	90	89.9	88.9	686.71	NEGIDA-1	119.0359:31115 120.03925:2958 121.04261:487	50.0034:11 64.00275:11 64.00388:33 65.01428:281 67.03013:58 68.02588:22 77.01369:2 90.00741:33 92.02508:177 95.9516:4 98.928:1 114.612:1 118.67122:8 118.69719:4 119.03664:1509	273086	267125	282591
57	14.663	879.78	120.932	Unknown	[M-H]-		1	FALSE	null	null	null	null	null	null	4		FALSE	null	null	null	null	null	null	null	66.25	NEGIDA-3	120.93192:1188 121.93527:51 122.93863:9		15441	13854	15420
58	5.471	328.26	122.035	w/o MS2:Acetamide, N-(2-chloroethyl)-	[M-H]-	found in higher mz's MsMs_117; similar chromatogram in higher mz_117; similar chromatogram in higher mz_100; similar chromatogram in higher mz_265; similar chromatogram in higher mz_191; found in higher mz's MsMs_191	1	TRUE	null	122.037	C4H8ClNO				3		FALSE	null	null	99	null	null	null	null	111.6	NEGIDA-1	122.03529:2858 123.03864:210 124.042:61	61.98917:10 64.96231:10 78.04487:10	17958	18346	19058
59	14.704	882.24	122.968	Unknown	[M-H]-		1	TRUE	null	null	null	null	null	null	4		FALSE	null	null	null	null	null	null	null	368.24	NEGIDA-1	122.9695:12378 123.97285:902 124.97621:848	65.00861:12 122.97051:150	133079	124825	137479
60	4.229	253.74	125.034	Propylphosphonic acid	[M-H]-	found in higher mz's MsMs_259; found in higher mz's MsMs_166; similar chromatogram in higher mz_259	1	TRUE	null	125.036	C3H9O3P				2		FALSE	null	null	86.2	null	88	83.6	50	455.98	NEGIDA-3	125.03434:11278 126.03769:1177 127.04105:147	125.0337:12	82349	79133	81223
61	2.209	132.54	125.034	Unknown	[M-H]-		1	TRUE	null	null	null	null	null	null	4		FALSE	null	null	null	null	null	null	50	433.52	NEGIDA-1	125.0343:10562 126.03765:745 127.04101:34	125.03682:36	91288	89558	92631
62	0.98	58.8	127.05	w/o MS2:Thymine; LC-ESI-QTOF; MS2; CE	[M-H]-	found in higher mz's MsMs_81; found in higher mz's MsMs_445	1	FALSE	null	127.05	C5H6N2O2	Hydroxypyrimidines	RWQNBRDOKXIBIV-UHFFFAOYSA-N	CC1=CN=C(O)N=C1O	3		FALSE	null	null	100	null	null	null	null	45.05	NEGIDA-3	127.05002:1403 128.05337:769 129.05673:266		9959	10031	10215
63	0.98	58.8	128.035	w/o MS2:Pyroglutamic acid (Not validated); PlaSMA ID-39	[M-H]-		1	FALSE	1.76	128.035	C5H7NO3	Alpha amino acids and derivatives	ODHCTXKNWHHXJC-UHFFFAOYNA-N	O=C(O)C1NC(=O)CC1	3		FALSE	null	null	100	100	null	null	null	93.66	NEGIDA-2	128.03488:2527 129.03823:203 130.04159:18406		20959	21804	20932
64	0.98	58.8	130.051	w/o MS2:N-ACETYL-L-ALANINE	[M-H]-		1	TRUE	null	130.051	C5H9NO3	N-acyl-alpha amino acids	KTHDTJVBEPMMGL-UHFFFAOYNA-N	CC(NC(C)=O)C(O)=O	2		FALSE	null	null	77.8	null	null	null	null	486.72	NEGIDA-1	130.0513:10358 131.05465:9144 132.05801:1322	71.01224:12 71.01342:12 88.04102:226 128.03094:12 128.04366:12 130.05428:24	77400	73296	73512
65	1.572	94.32	130.087	L-Leucine; LC-ESI-QTOF; MS2; CE	[M-H]-		1	TRUE	null	130.087	C6H13NO2	Leucine and derivatives	ROHFNLRQFUQHCH-YFKPBYRVSA-N	CC(C)C[C@H](N)C(O)=O	2	2	FALSE	null	null	86.1	null	75	75	100	1191.39	NEGIDA-1	130.08684:17951 131.09019:2374 132.09355:206	130.08005:12 130.08644:102	137354	139791	135079
66	1.122	67.32	130.965	w/o MS2:Hypophosphorous acid	[M-H]-		1	FALSE	null	130.967	H3O2P				3		FALSE	null	null	98.3	null	null	null	null	36.1	NEGIDA-1	130.96503:2567 131.96838:74 132.97174:41		38080	46381	37140
67	1.005	60.3	131.082	Unknown (carbon number 10); PlaSMA ID-98	[M+H]+	found in higher mz's MsMs_112	1	TRUE	3.28	131.086	C10H10	NA			2		FALSE	null	null	80.4	100	88	66.4	50	71.81	NEGIDA-2	131.08221:4621 132.08556:451 133.08892:14	131.08171:12	41164	40519	40321
68	0.956	57.36	132.03	L-Aspartic acid	[M-H]-	similar chromatogram in higher mz_83; similar chromatogram in higher mz_109; similar chromatogram in higher mz_131; similar chromatogram in higher mz_187; similar chromatogram in higher mz_219; similar chromatogram in higher mz_276; similar chromatogram in higher mz_474; similar chromatogram in higher mz_480; similar chromatogram in higher mz_160; similar chromatogram in higher mz_396; found in h…	1	TRUE	null	132.03	C4H7NO4				2	2	FALSE	null	null	89.7	null	90	86.3	66.7	795.54	NEGIDA-1	132.02916:13405 133.03251:1230 134.03587:252	71.0181:60 88.04098:81 115.00262:36 132.03214:36	98803	102118	99207
69	0.931	55.86	133.013	w/o MS2:L-Tartaric acid	[M-H]-		0.333	FALSE	null	133.013	C4H6O6				3		FALSE	null	null	99.8	null	null	null	null	30.72	NEGIDA-1	133.01253:1123 134.01588:70 135.01924:178		10066	9164	9062
70	14.774	886.44	133.014	w/o MS2:Malic acid	[M-H]-		0.667	FALSE	null	133.014	C4H6O5	Beta hydroxy acids and derivatives	BJEPYKJPYRNKOW-UHFFFAOYNA-N	O=C(O)CC(O)C(=O)O	3		FALSE	null	null	100	null	null	null	null	51.81	NEGIDA-3	133.01439:1893 134.01774:126 135.0211:68		24528	23717	25063
71	5.725	343.5	133.039	Unknown	[M-H]-	similar chromatogram in higher mz_89; found in higher mz's MsMs_89; similar chromatogram in higher mz_288; similar chromatogram in higher mz_217; found in higher mz's MsMs_217; similar chromatogram in higher mz_253; similar chromatogram in higher mz_318; found in higher mz's MsMs_318	1	TRUE	null	null	null	null	null	null	4		FALSE	null	null	null	null	null	null	null	33.02	NEGIDA-1	133.03877:1165 134.04212:180 135.04548:109	88.98717:10 132.03877:24	7930	7032	8055
72	2.433	145.98	134.047	Adenine; LC-ESI-QTOF; MS2; CE	[M-H]-		1	TRUE	null	134.047	C5H5N5	6-aminopurines	GFFGJBXGBJISGV-UHFFFAOYSA-N	NC1=C2N=CN=C2NC=N1	2	2	FALSE	null	null	93.1	null	87.9	87.3	100	957.38	NEGIDA-1	134.04671:27002 135.05006:2779 136.05342:60	64.0062:6 65.01437:81 66.00648:6 68.02481:18 79.01682:2 80.0261:8 90.01151:5 92.02655:132 99.98833:1 106.03013:11 107.03619:425 117.01797:5 132.02597:2 133.63103:4 134.048:732	272952	273890	271851
73	6.719	403.14	134.047	Unknown	[M-H]-	found in higher mz's MsMs_236; found in higher mz's MsMs_311	1	TRUE	null	null	null	null	null	null	4		FALSE	null	null	null	null	null	null	100	368.11	NEGIDA-1	134.04642:10490 135.04977:1583 136.05313:45	92.02363:12 92.02632:24 107.04317:24 134.05093:77	66288	70948	68248
74	4.566	273.96	134.047	Adenine	[M-H]-	found in higher mz's MsMs_264; found in higher mz's MsMs_194; similar chromatogram in higher mz_194	1	TRUE	null	134.047	C5H5N5	6-aminopurines	GFFGJBXGBJISGV-UHFFFAOYSA-N	N=1C=NC2=C(N=CNC12)N	2		FALSE	null	null	92.8	null	87	87	100	269.75	NEGIDA-2	134.04681:8001 135.05016:1017 136.05352:38	92.0226:6 92.02529:12 107.03919:48 134.04651:117	56911	54553	56450
75	1.595	95.7	135.031	Hypoxanthine	[M-H]-		1	TRUE	null	135.031	C5H4N4O	Hypoxanthines	FDGQSTZJBFJUBT-UHFFFAOYSA-N	OC1=NC=NC=2NC=NC12	2	2	FALSE	null	null	90	null	92.2	89.6	53.8	335.63	NEGIDA-3	135.03096:19303 136.03431:2499 137.03767:435	64.00848:48 65.0144:235 66.0088:137 92.01718:36 92.02525:504 106.02585:12 133.01088:12 133.02058:24 135.03064:165	141012	139523	137848
76	2.885	173.1	135.031	w/o MS2:Hypoxanthine	[M-H]-	found in higher mz's MsMs_196	1	FALSE	null	135.031	C5H4N4O	Hypoxanthines	FDGQSTZJBFJUBT-UHFFFAOYSA-N	OC1=NC=NC=2NC=NC12	3		FALSE	null	null	99.9	null	null	null	null	19.92	NEGIDA-1	135.03078:1249 136.03413:74 137.03749:240		9389	7892	7892
77	8.047	482.82	143.049	1-Naphthol	[M-H]-		1	TRUE	null	143.05	C10H8O				2		FALSE	null	null	92.4	null	93.8	91.8	66.7	39.11	NEGIDA-3	143.05037:1274 144.05372:705 145.05708:127	115.05543:7 143.05365:7	9847	11675	10954
78	9.838	590.28	143.107	2-Propyl-2-pentenoic acid	[M-H]-		1	TRUE	null	143.107	C8H14O2				2		FALSE	null	null	80.3	null	75	74.4	50	62.98	NEGIDA-2	143.10594:2893 144.10929:347 145.11265:55	143.10419:10	20039	20618	19853
79	8.031	481.86	144.044	4-Hydroxyquinoline	[M-H]-		0.333	TRUE	2.933	144.045	C9H7NO	Hydroquinolones	PMZDQRJGMBOQBF-UHFFFAOYSA-N	O=C1C=CNC2=CC=CC=C12	2		FALSE	null	null	90.6	99.9	82.7	85.9	100	54.26	NEGIDA-2	144.04366:1241 145.04701:172 146.05037:28	93.99994:1 116.04747:2 142.02895:1 144.04509:40	5496	6419	5774
80	11.765	705.9	144.103	w/o MS2:N-Methylisoleucine	[M-H]-	similar chromatogram in higher mz_124; similar chromatogram in higher mz_312; similar chromatogram in higher mz_314; similar chromatogram in higher mz_363; similar chromatogram in higher mz_427	1	TRUE	null	144.103	C7H15NO2	Isoleucine and derivatives	KSPIYJQBLVDRRI-UHFFFAOYNA-N	O=C(O)C(NC)C(C)CC	3		FALSE	null	null	100	null	null	null	null	453.4	NEGIDA-2	144.10283:8495 145.10618:1685 146.10954:137	78.86627:10 99.92831:24	60426	61639	62517
81	0.98	58.8	145.061	Glutamine; LC-ESI-ITFT; MS2; CE 70.0 eV; [M-H]-	[M-H]-	found in higher mz's MsMs_445	1	TRUE	null	145.062	C5H10N2O3	Alpha amino acids	ZDXPYRJPNDTMRX-UHFFFAOYNA-N	NC(CCC(O)=N)C(O)=O	2	2	FALSE	null	null	88.8	null	88	81.5	75	236.49	NEGIDA-3	145.06061:5851 146.06396:999 147.06732:376	109.03493:12 127.04622:12 145.10104:24	42424	41476	42248
82	8.72	523.2	145.076	5,6-Dimethylbenzimidazole	[M-H]-		0.333	TRUE	null	145.077	C9H10N2	Benzimidazoles	LJUQGASMPRMWIW-UHFFFAOYSA-N	N1=CNC=2C=C(C(=CC12)C)C	2		FALSE	null	null	80	null	63.1	67.1	100	28.13	NEGIDA-3	145.07559:1039 146.07894:115 147.0823:99	130.05299:2 130.05779:1 144.06715:10 145.07726:33	4401	4383	5112
83	0.956	57.36	146.045	L-Glutamic acid	[M-H]-	similar chromatogram in higher mz_121; similar chromatogram in higher mz_104	1	TRUE	null	146.046	C5H9NO4				2		FALSE	null	null	96.1	null	93.1	93.1	100	47.31	NEGIDA-3	146.04526:1972 147.04861:180 148.05197:60	102.05641:36 128.03296:12 146.04356:24	14036	14504	14808
84	1.831	109.86	146.082	w/o MS2:1-Deoxynojirimycin	[M-H]-	found in higher mz's MsMs_146; similar chromatogram in higher mz_415; found in higher mz's MsMs_415; similar chromatogram in higher mz_146; similar chromatogram in higher mz_327; found in higher mz's MsMs_327; similar chromatogram in higher mz_325; found in higher mz's MsMs_325; found in higher mz's MsMs_432; similar chromatogram in higher mz_252	1	TRUE	null	146.081	C6H13NO4				2		FALSE	null	null	70.1	null	null	null	null	33.63	NEGIDA-2	146.0822:1411 147.08555:132 148.08891:14	99.04948:10 146.03815:10	9714	9867	9887
85	1.122	67.32	146.96	w/o MS2:1H-Pyrazole, 3-bromo-	[M-H]-		1	FALSE	null	146.955	C3H3BrN2				3		FALSE	null	null	87.1	null	null	null	null	20.66	NEGIDA-3	146.96045:3112 147.9638:88 148.96716:141		53206	53377	62457
86	3.096	185.76	147.045	w/o MS2:Coumaric acid (isomer of 192, 194); PlaSMA ID-189	[M-H]-	similar chromatogram in higher mz_101; found in higher mz's MsMs_101; similar chromatogram in higher mz_243; similar chromatogram in higher mz_247; found in higher mz's MsMs_247; found in higher mz's MsMs_243	1	TRUE	2.71	147.045	C9H8O3	Hydroxycinnamic acids	NGSWKAQJJWESNS-UHFFFAOYSA-N	O=C(O)C=CC1=CC=C(O)C=C1	3		FALSE	null	null	100	100	null	null	null	40.29	NEGIDA-1	147.04475:4799 148.0481:791 149.05146:139	61.98813:10 87.92543:12	37440	36315	36579
87	1.308	78.48	148.043	L-Methionine	[M-H]-	similar chromatogram in higher mz_226	1	TRUE	null	148.044	C5H11NO2S				2	2	FALSE	null	null	86.7	null	69.2	87	100	293.9	NEGIDA-1	148.04295:5656 149.0463:339 150.04966:352	63.96698:5 100.03468:5 148.0468:5	55528	55364	55774
88	1.893	113.58	148.062	w/o MS2:Adenine, N6-methyl	[M-H]-	similar chromatogram in higher mz_466; similar chromatogram in higher mz_491; found in higher mz's MsMs_289; similar chromatogram in higher mz_289; found in higher mz's MsMs_218; similar chromatogram in higher mz_218	1	TRUE	null	148.063	C6H7N5				3		FALSE	null	null	99.5	null	null	null	null	168.74	NEGIDA-2	148.06189:3270 149.06524:279 150.0686:10	82.04491:10 107.03631:12	24677	24999	24309
89	5.717	343.02	148.062	Adenine, N6-methyl	[M-H]-	found in higher mz's MsMs_318; found in higher mz's MsMs_288; found in higher mz's MsMs_253; found in higher mz's MsMs_217; found in higher mz's MsMs_473; found in higher mz's MsMs_272; found in higher mz's MsMs_277	1	TRUE	null	148.063	C6H7N5				2		FALSE	null	null	92.5	null	89.4	89	87.5	1735.08	NEGIDA-3	148.06203:33998 149.06538:4230 150.06874:184	66.00996:48 106.02445:12 117.02111:60 132.03093:129 133.04166:502 134.66751:10 146.04514:24 148.06219:235	228122	224099	233440
90	14.793	887.58	149.009	Tartaric acid	[M-H]-		1	TRUE	null	149.009	C4H6O6	Sugar acids and derivatives	FEWJPZIEWOKRBE-UHFFFAOYNA-N	O=C(O)C(O)C(O)C(=O)O	2		FALSE	null	null	87.9	null	90.4	84	57.1	210.21	NEGIDA-2	149.00728:13789 150.01063:742 151.01399:268	72.99023:24 72.99383:88 76.96585:10 87.0073:69 105.02027:10 149.0108:48	183617	183564	188849
91	8.743	524.58	150.001	Benzisothiazolone (BIT); LC-ESI-ITFT; MS2; CE	[M-H]-		1	TRUE	null	150.002	C7H5NOS	Benzothiazoles	DMSMPAJRVJJAGA-UHFFFAOYSA-N	OC1=NSC2=CC=CC=C12	2		FALSE	null	null	83.8	null	85.5	73.6	50	230.13	NEGIDA-2	150.00182:6189 151.00517:1089 152.00853:525	104.97859:1 122.00067:2 122.00687:6 150.00198:227	34783	32484	36561
92	3.011	180.66	150.041	w/o MS2:2-Methylbenzothiazole; LC-ESI-ITFT; MS2; CE	[M-H]-	similar chromatogram in higher mz_222; found in higher mz's MsMs_222; similar chromatogram in higher mz_256; similar chromatogram in higher mz_322; found in higher mz's MsMs_322; found in higher mz's MsMs_256; found in higher mz's MsMs_475	1	TRUE	null	150.037	C8H7NS	Benzothiazoles	DXYYSGDWQCSKKO-UHFFFAOYSA-N	CC1=NC2=CC=CC=C2S1	2		FALSE	null	null	78.9	null	null	null	null	133.42	NEGIDA-3	150.04128:4000 151.04463:444 152.04799:170	150.00018:24	28626	27758	28999
93	1.634	98.04	151.025	Unknown (carbon number 5); PlaSMA ID-102	[M-H]-	found in higher mz's MsMs_286	1	TRUE	1.76	151.025	C5H4N4O2	NA			2		FALSE	null	null	92	100	84.5	87.1	100	1246.74	NEGIDA-1	151.02518:53638 152.02853:7176 153.03189:671	63.0047:6 65.99725:42 80.02597:46 107.6885:12 108.02204:832 133.01382:18 151.02715:767	395464	364450	371119
94	8.41	504.6	151.039	C8H8O3; PlaSMA ID-105	[M-H]-		1	TRUE	4.25	151.039	C8H8O3	NA			2		FALSE	null	null	82.4	99.9	52.2	93.2	100	91.05	NEGIDA-2	151.03944:4352 152.04279:407 153.04615:46	82.00541:1 92.0265:96 108.01925:5 130.98854:1 136.01338:43 140.2644:1 151.03937:35	21831	19474	20100
95	1.028	61.68	154.062	L-Histidine	[M-H]-	found in higher mz's MsMs_156	1	TRUE	null	154.062	C6H9N3O2				2	2	FALSE	null	null	92.9	null	97.1	90.5	64.3	900.26	NEGIDA-2	154.06187:16986 155.06522:2231 156.06858:721	67.03025:36 72.01099:24 80.03242:12 80.03744:36 81.05193:12 93.04247:140 110.06967:24 136.04785:12 137.0377:48 154.05873:96	134401	135395	129422
96	0.98	58.8	156.028	w/o MS2:L-Aspartic acid	[M-H]-		1	FALSE	null	156.027	C4H7NO4				3		FALSE	null	null	99.4	null	null	null	null	74.15	NEGIDA-1	156.02783:1215 157.03118:312 158.03454:161		8208	7818	7821
97	14.475	868.5	158.978	Unknown	[M-H]-		1	FALSE	null	null	null	null	null	null	4		FALSE	null	null	null	null	null	null	null	71.22	NEGIDA-1	158.97766:6257 159.98101:1079 160.98437:1129		91456	136712	139418
98	14.702	882.12	160.931	Unknown	[M-H]-		0.333	FALSE	null	null	null	null	null	null	4		FALSE	null	null	null	null	null	null	null	51.44	NEGIDA-3	160.93103:1776 161.93438:27 162.93774:213		20934	19745	20733
99	1.541	92.46	163.039	w/o MS2:Rosmarinic acid	[M-H]-	similar chromatogram in higher mz_119; found in higher mz's MsMs_119; found in higher mz's MsMs_271; similar chromatogram in higher mz_271; similar chromatogram in higher mz_268	1	TRUE	null	163.039	C18H16O8				2		FALSE	null	null	74.4	null	null	null	null	45.99	NEGIDA-2	163.03883:2076 164.04218:255 165.04554:275	74.95631:10 116.97548:10 135.04033:10 162.88721:10 163.05908:10	15710	15241	15234
100	5.471	328.26	164.034	w/o MS2:Unknown (carbon number 8); PlaSMA ID-137	[M-H]-	found in higher mz's MsMs_117; found in higher mz's MsMs_354; found in higher mz's MsMs_375; found in higher mz's MsMs_270; found in higher mz's MsMs_265; found in higher mz's MsMs_114	1	TRUE	3.17	164.034	C8H7NO3	NA			3		FALSE	null	null	100	100	null	null	null	366.99	NEGIDA-2	164.03427:7401 165.03762:1343 166.04098:181	135.00937:6	45423	49245	49630
101	3.096	185.76	164.072	L-(-)-Phenylalanine; LC-ESI-QTOF; MS2; CE	[M-H]-	found in higher mz's MsMs_243	1	TRUE	null	164.072	C9H11NO2	Phenylalanine and derivatives	COLNVLDHVKWLRT-QMMMGPOBSA-N	N[C@@H](CC1=CC=CC=C1)C(O)=O	2	2	FALSE	null	null	94.8	null	95.2	94	80	1352.7	NEGIDA-2	164.07161:26841 165.07496:4210 166.07832:399	72.01084:36 103.05737:76 147.03793:12 147.04645:174 164.06505:36 164.07224:60	217250	218468	212668
102	8.529	511.74	165.04	w/o MS2:Allicin + 2H (not validated, isomer of 328); PlaSMA ID-327	[M-H]-		0.333	TRUE	4.41	165.04	C6H12OS2	Thiosulfinic acid esters	XLVMWOFYTFNDKM-UHFFFAOYNA-N	O=S(CCC)SC=CC	3		FALSE	null	null	100	99.9	null	null	null	27.22	NEGIDA-2	165.04021:1245 166.04356:247 167.04692:107	64.80549:2 74.98807:12 133.97688:2 149.00421:26	8647	7121	7246
103	8.275	496.5	168.836	Unknown	[M-H]-		0.333	FALSE	null	null	null	null	null	null	4		FALSE	null	null	null	null	null	null	null	8.08	NEGIDA-2	168.83611:3006 169.83946:44 170.84282:5050		23539	23311	23883
104	0.948	56.88	168.988	Unknown	[M-H]-		1	FALSE	null	null	null	null	null	null	4		FALSE	null	null	null	null	null	null	null	22.73	NEGIDA-1	168.98848:1206 169.99183:156 170.99519:4598		13316	11306	11652
105	6.15	369	168.989	Unknown	[M-H]-		1	TRUE	null	null	null	null	null	null	4		FALSE	null	null	null	null	null	null	null	16.47	NEGIDA-3	168.98918:3878 169.99253:112 170.99589:38	132.9267:2 168.83484:6	28637	29384	31924
106	4.227	253.62	170.832	Unknown	[M-H]-		0.333	FALSE	null	null	null	null	null	null	4		FALSE	null	null	null	null	null	null	null	5.55	NEGIDA-3	170.83168:2230 171.83503:189 172.83839:2507		30922	15637	28035
107	5.471	328.26	170.832	Unknown	[M-H]-		1	FALSE	null	null	null	null	null	null	4		FALSE	null	null	null	null	null	null	null	7.23	NEGIDA-2	170.83179:3051 171.83514:237 172.8385:3463		31763	36129	31734
108	8.275	496.5	170.832	Unknown	[M-H]-		0.333	FALSE	null	null	null	null	null	null	4		FALSE	null	null	null	null	null	null	null	9.65	NEGIDA-2	170.83191:4615 171.83526:298 172.83862:4104		35498	37623	37048
109	0.956	57.36	171.004	Glycerophosphate(2)	[M-H]-		1	TRUE	null	171.006	C3H9O6P	Glycerophosphates	AWUCVROLDVIAJX-GSVOUGTGSA-N	OC[C@@H](O)COP(O)(O)=O	2		FALSE	null	null	82.6	null	88	67.8	50	59.25	NEGIDA-3	171.00438:3190 172.00773:1448 173.01109:807	78.95956:48	25596	26975	26792
110	11.828	709.68	171.138	w/o MS2:delta-Decalactone; LC-ESI-QTOF; MS2; [M+H]+; CE	[M-H]-		1	TRUE	null	171.138	C10H18O2	Delta valerolactones	GHBSPIPJMLAMEP-UHFFFAOYNA-N	CCCCCC1CCCC(=O)O1	3		FALSE	null	null	100	null	null	null	null	32.77	NEGIDA-3	171.13786:2237 172.14121:198 173.14457:52	75.00486:10 78.92208:10 125.2204:10 152.89624:10	37588	38899	38995
111	0.972	58.32	172.022	Unknown	[M-H]-		1	FALSE	null	null	null	null	null	null	4		FALSE	null	null	null	null	null	null	null	80.53	NEGIDA-3	172.0219:1897 173.02525:685 174.02861:233		12031	12620	12791
112	1.005	60.3	173.104	L-(+)-Arginine; LC-ESI-QTOF; MS2; CE	[M-H]-		1	TRUE	null	173.104	C6H14N4O2	L-alpha-amino acids	ODKSFYDXXFIFQN-BYPYZUCNSA-N	N[C@@H](CCCNC(N)=N)C(O)=O	2	2	FALSE	null	null	90.8	null	83.9	83.9	100	271.69	NEGIDA-2	173.10309:7318 174.10644:1073 175.1098:128	131.07214:12 131.08017:298 173.09659:12	61966	60761	60690
113	1.122	67.32	174.956	w/o MS2:4-Chlorobenzenesulfonamide	[M-H]-		1	FALSE	null	174.962	C6H6ClNO2S				3		FALSE	null	null	88	null	null	null	null	45.13	NEGIDA-2	174.95644:8112 175.95979:318 176.96315:207		141831	119475	143931
114	5.476	328.56	178.506	Unknown	[M-H]-		0.333	TRUE	null	null	null	null	null	null	4		FALSE	null	null	null	null	null	null	null	145.45	NEGIDA-1	178.50648:1001 179.50983:146 180.51319:27	164.02571:12	6189	6336	6404
115	0.038	2.28	178.977	Unknown	[M-H]-		0.333	FALSE	null	null	null	null	null	null	4		FALSE	null	null	null	null	null	null	null	62.02	NEGIDA-3	178.97745:12619 179.9808:315 180.98416:750		47789	50897	71498
116	0.98	58.8	179.054	w/o MS2:D-Fructose	[M-H]-		1	TRUE	null	179.056	C6H12O6				2		FALSE	null	null	63.7	null	null	null	null	91.16	NEGIDA-1	179.05353:7257 180.05688:1323 181.06024:839	59.00898:12 59.01329:48 61.96912:60 71.00856:12 78.0013:48 85.02984:12 89.02529:36 134.97795:12 134.98773:80	55347	55793	53838
117	5.471	328.26	179.058	Theophylline	[M-H]-	found in higher mz's MsMs_375; found in higher mz's MsMs_354; found in higher mz's MsMs_270; found in higher mz's MsMs_265; found in higher mz's MsMs_191	1	TRUE	null	179.057	C7H8N4O2	Xanthines	ZFXYFBGIUFBOJW-UHFFFAOYSA-N	O=C1C=2N=CNC2N(C(=O)N1C)C	2	2	FALSE	null	null	84.4	null	60.7	94.5	88.9	2810.59	NEGIDA-1	179.05779:222070 180.06114:35567 181.0645:3519	65.9985:188 66.01218:12 68.01324:10 79.01932:284 94.04349:295 100.97946:10 107.01007:191 109.02155:12 112.13922:10 120.01812:75 121.02507:48 122.03622:1320 135.03056:370 136.03961:81 164.03481:1875 179.05713:1666	1408167	1491958	1521814
118	10.3	618	179.071	w/o MS2:Propylparaben	[M-H]-		1	TRUE	null	179.071	C10H12O3	p-Hydroxybenzoic acid alkyl esters	QELSKZZBTMNZEB-UHFFFAOYSA-N	CCCOC(C1=CC=C(C=C1)O)=O	2		FALSE	null	null	69.4	null	null	null	null	29.34	NEGIDA-1	179.07103:2110 180.07438:519 181.07774:45	76.96825:2 84.98746:2 90.97343:1 92.02789:13 93.03431:4 95.01434:2 116.9315:2 136.0118:2 140.94131:7 160.94734:2 179.07025:9	14138	16272	14627
119	1.541	92.46	180.067	Tyr	[M-H]-	found in higher mz's MsMs_271	1	TRUE	null	180.067	C9H11NO3	Tyrosine and derivatives	OUYCCCASQSFEME-QMMMGPOBSA-N	N[C@@H](CC1=CC=C(O)C=C1)C(O)=O	2	2	FALSE	null	null	93.6	null	87.7	89.7	100	1286.3	NEGIDA-1	180.06705:34180 181.0704:5857 182.07376:670	72.01099:16 93.03029:8 93.03435:43 119.05215:164 132.04535:3 160.03595:3 163.03946:122 167.21512:3 180.06827:88	259384	249856	249044
120	14.833	889.98	180.971	Unknown	[M-H]-		1	FALSE	null	null	null	null	null	null	4		FALSE	null	null	null	null	null	null	null	85.03	NEGIDA-1	180.97096:4341 181.97431:116 182.97767:233		55691	56171	57820
121	0.969	58.14	180.972	w/o MS2:Seleno-L-methionine	[M-H]-		0.667	FALSE	null	180.976	C5H11NO2Se				3		FALSE	null	null	91.5	null	null	null	null	24.01	NEGIDA-3	180.97197:1243 181.97532:105 182.97868:82		9660	9148	9826
122	9.269	556.14	184.984	Unknown	[M-H]-		1	FALSE	null	null	null	null	null	null	4		FALSE	null	null	null	null	null	null	null	66.62	NEGIDA-3	184.98404:2160 185.98739:84 186.99075:18		14614	15547	16042
123	0.94	56.4	184.985	w/o MS2:3-Phospho-D-glycerate; LC-ESI-ITFT; MS2; m/z	[M-H]-		1	FALSE	null	184.986	C3H7O7P	Sugar acids and derivatives	OSJPPGNTCRNQQC-UWTATZPHSA-N	O[C@H](COP(O)(O)=O)C(O)=O	3	1	FALSE	null	null	99.9	null	null	null	null	52.68	NEGIDA-2	184.98534:1848 185.98869:103 186.99205:29		21125	20641	17256
124	11.765	705.9	188.091	w/o MS2:NCGC00381347-01!5-acetamido-4-oxohexanoic acid	[M-H]-		1	TRUE	null	188.092	C8H13NO4	Medium-chain keto acids and derivatives	QSRUAKBTZTXXLM-UHFFFAOYNA-N	CC(N=C(C)O)C(=O)CCC(O)=O	3		FALSE	null	null	99.8	null	null	null	null	627.13	NEGIDA-2	188.09109:6765 189.09444:1116 190.0978:169	137.93591:10	46817	48855	46966
125	14.777	886.62	190.034	w/o MS2:Dehydroascorbic acid	[M-H]-		1	TRUE	null	190.036	C6H6O6				3		FALSE	null	null	99	null	null	null	null	107.55	NEGIDA-3	190.0343:4624 191.03765:12161 192.04101:2570	59.00925:10 110.01971:12	67670	70687	71326
126	1.538	92.28	191.018	w/o MS2:Unknown (carbon number 6); PlaSMA ID-226	[M-H]-		0.667	FALSE	1.99	191.018	C6H8O7	NA			3		FALSE	null	null	100	100	null	null	null	30.12	NEGIDA-1	191.0179:4014 192.02125:297 193.02461:98		57871	47189	47728
127	14.87	892.2	191.019	Citric acid	[M-H]-		0.333	TRUE	null	191.02	C6H8O7				2		FALSE	null	null	91.4	null	91.6	88.7	71.4	788.11	NEGIDA-3	191.01889:61471 192.02224:5081 193.0256:1352	67.01386:12 67.01501:60 76.98393:12 85.0272:120 87.00819:281 111.00844:1265 114.20964:10 129.01959:48 191.01845:84	734639	677508	683494
128	0.909	54.54	191.02	w/o MS2:Citric acid	[M-H]-		1	FALSE	null	191.02	C6H8O7	Tricarboxylic acids and derivatives	KRKNYBCHXYNGOX-UHFFFAOYSA-N	O=C(O)CC(O)(C(=O)O)CC(=O)O	3		FALSE	null	null	100	null	null	null	null	65.6	NEGIDA-3	191.01987:7680 192.02322:1117 193.02658:391		102302	105107	103162
129	14.681	880.86	194.928	Unknown	[M-H]-		0.667	FALSE	null	null	null	null	null	null	4		FALSE	null	null	null	null	null	null	null	24.81	NEGIDA-2	194.92773:1058 195.93108:32 196.93444:255		8093	8258	7904
130	0.98	58.8	198.038	w/o MS2:N-Acetyl-L-aspartic acid	[M-H]-		1	FALSE	null	198.037	C6H9NO5				3		FALSE	null	null	99.9	null	null	null	null	130.73	NEGIDA-2	198.03766:2117 199.04101:2384 200.04437:576		12026	14354	13741
131	0.943	56.58	199	w/o MS2:(+/-)-11-Hydroxy-5Z,8Z,12E,14Z,17Z-eicosapentaenoic acid	[M-H]-	similar chromatogram in higher mz_483	0.667	TRUE	null	199	C20H30O3				3		FALSE	null	null	100	null	null	null	null	43.65	NEGIDA-2	199.00012:1353 200.00347:283 201.00683:42	78.95581:10	11170	11175	11593
132	11.765	705.9	199.171	w/o MS2:Dodecanoic acid	[M-H]-	found in higher mz's MsMs_427; found in higher mz's MsMs_363; found in higher mz's MsMs_314; found in higher mz's MsMs_312; found in higher mz's MsMs_197	1	TRUE	null	199.17	C12H24O2				3		FALSE	null	null	100	null	null	null	null	354.77	NEGIDA-2	199.17067:11160 200.17402:3011 201.17738:228	142.05582:10 199.16606:24	79974	84100	84909
133	1.816	108.96	200.055	w/o MS2:O-Succinyl-L-homoserine	[M-H]-	found in higher mz's MsMs_171; found in higher mz's MsMs_230; found in higher mz's MsMs_446	1	TRUE	null	200.056	C8H13NO6				3		FALSE	null	null	99.5	null	null	null	null	148.05	NEGIDA-1	200.05537:2818 201.05872:477 202.06208:71	61.98586:12 61.98807:12 61.99469:12 68.0132:10 200.18251:10	20071	17572	19216
134	4.365	261.9	200.075	w/o MS2:Unknown (carbon number 9); PlaSMA ID-654	[M-H]-	similar chromatogram in higher mz_174; found in higher mz's MsMs_174; similar chromatogram in higher mz_447; found in higher mz's MsMs_447; similar chromatogram in higher mz_192; similar chromatogram in higher mz_455; found in higher mz's MsMs_349; similar chromatogram in higher mz_291; similar chromatogram in higher mz_461; found in higher mz's MsMs_461; found in higher mz's MsMs_351; similar ch…	1	TRUE	3.42	200.076	C9H13NO2S	NA			3		FALSE	null	null	99.9	100	null	null	null	72.37	NEGIDA-2	200.07533:1374 201.07868:287 202.08204:133	61.98582:12 61.98692:12 103.922:10	9417	9365	8898
135	1.099	65.94	201.134	w/o MS2:N,N-Dimethylarginine	[M-H]-		1	TRUE	null	201.136	C8H18N4O2	Alpha amino acids	NWGZOALPWZDXNG-UHFFFAOYNA-N	O=C(O)C(N(C)C)CCCNC(=N)N	3	1	FALSE	null	null	99.2	null	null	null	null	174.04	NEGIDA-1	201.13443:4454 202.13778:681 203.14114:20	112.09174:12	49933	51002	49090
136	4.474	268.44	203.082	Tryptophan; LC-ESI-ITFT; MS2; HCD; CE 85.0 eV; [M-H]-	[M-H]-		1	TRUE	null	203.083	C11H12N2O2	Indolyl carboxylic acids and derivatives	QIVBCDIJIAJPQS-UHFFFAOYNA-N	NC(CC1=CNC2=CC=CC=C12)C(O)=O	2	2	FALSE	null	null	92.4	null	89.7	89.6	83.3	163.02	NEGIDA-2	203.08261:5656 204.08596:1321 205.08932:105	72.00876:5 74.02927:5 116.04929:55 118.94988:2 140.92334:2 142.06444:12 186.05716:2 203.08469:12	41674	40748	41328
137	14.785	887.1	205.035	w/o MS2:Lipoic acid	[M-H]-		1	TRUE	null	205.036	C8H14O2S2	Lipoic acids and derivatives	AGBQKNBQESQNJD-UHFFFAOYNA-N	O=C(O)CCCCC1SSCC1	3		FALSE	null	null	99.3	null	null	null	null	173.18	NEGIDA-1	205.0351:6984 206.03845:489 207.04181:131	57.03701:12 83.01547:24 111.0042:36	85901	86633	89078
138	0.979	58.74	206.971	w/o MS2:Aminopyralid	[M-H]-		0.333	FALSE	null	206.972	C6H4Cl2N2O2				3		FALSE	null	null	99.4	null	null	null	null	18.16	NEGIDA-1	206.97125:2465 207.9746:172 208.97796:633		38114	37548	41166
139	7.207	432.42	207.011	2-Naphthalenesulfonic acid; LC-ESI-ITFT; MS2; CE	[M-H]-	found in higher mz's MsMs_154	1	TRUE	null	207.012	C10H8O3S	2-naphthalene sulfonates	KVBGVZZKJNLNJU-UHFFFAOYSA-N	OS(=O)(=O)C1=CC2=CC=CC=C2C=C1	2		FALSE	null	null	93.1	null	84.8	93	100	73.81	NEGIDA-3	207.01093:4036 208.01428:623 209.01764:245	65.00212:1 76.99679:1 79.9561:20 115.05135:5 118.99126:4 143.04915:38 162.9808:4 207.013:59	24888	27415	24738
140	0.979	58.74	213.048	w/o MS2:N-(2-Acetamido)iminodiacetic acid	[M-H]-		0.333	FALSE	null	213.048	C6H10N2O5				3		FALSE	null	null	99.9	null	null	null	null	21.86	NEGIDA-1	213.04788:1002 214.05123:329 215.05459:1913		6571	6196	6210
141	14.579	874.74	214.977	Unknown	[M-H]-		1	FALSE	null	null	null	null	null	null	4		FALSE	null	null	null	null	null	null	null	59.02	NEGIDA-1	214.97736:2246 215.98071:111 216.98407:182		41964	36927	38175
142	0.98	58.8	215.031	w/o MS2:NCGC00016349-11!7-hydroxy-6-methoxychromen-2-one	[M-H]-		1	FALSE	null	215.031	C10H8O4	7-hydroxycoumarins	RODXRVNMMDRFIK-UHFFFAOYSA-N	COC1=C(O)C=C2OC(=O)C=CC2=C1	3		FALSE	null	null	99.9	null	null	null	null	45.14	NEGIDA-3	215.03114:1516 216.03449:902 217.03785:954		9685	10008	10832
143	10.115	606.9	215.165	w/o MS2:12-Hydroxydodecanoic acid	[M-H]-		1	TRUE	null	215.165	C12H24O3				3		FALSE	null	null	99.9	null	null	null	null	111.58	NEGIDA-2	215.16487:1438 216.16822:276 217.17158:19	102.97233:2 156.90068:1 201.97685:1 215.16914:10	7477	7287	7492
144	8.272	496.32	216.089	w/o MS2:Pymetrozin	[M-H]-	similar chromatogram in higher mz_161; found in higher mz's MsMs_161	1	TRUE	null	216.089	C10H11N5O				3		FALSE	null	null	100	null	null	null	null	406.62	NEGIDA-3	216.08907:5095 217.09242:1364 218.09578:63	144.03992:18	29687	30441	32818
145	14.671	880.26	216.908	w/o MS2:Sulfuric acid	[M-H]-		1	FALSE	null	216.909	H2O4S				3		FALSE	null	null	99.3	null	null	null	null	74.74	NEGIDA-2	216.90823:2373 217.91158:103 218.91494:581		19517	19283	18862
146	1.831	109.86	218.102	D-(+)-Pantothenic acid; LC-ESI-QTOF; MS2; CE	[M-H]-	found in higher mz's MsMs_432; found in higher mz's MsMs_415	1	TRUE	null	218.103	C9H17NO5	Secondary alcohols	GHOKWGTUZJEAQD-ZETCQYMHSA-N	CC(C)(CO)[C@@H](O)C(O)=NCCC(O)=O	2	2	FALSE	null	null	94.2	null	93.4	93.7	80	3136.04	NEGIDA-2	218.10358:37698 219.10693:6794 220.11029:979	59.01886:12 71.04897:84 88.0385:278 89.72298:10 116.0671:12 146.07207:12 146.08392:229 218.10608:146	288131	270407	288077
147	2.329	139.74	219.078	5-Hydroxy-L-tryptophan	[M-H]-		1	TRUE	null	219.077	C11H12N2O3				2	2	FALSE	null	null	92.6	null	90.6	94	75	173.93	NEGIDA-3	219.07648:13373 220.07983:2052 221.08319:226	74.02193:12 130.0674:5 131.0401:10 132.04866:36 138.95053:2 144.04529:61 158.06038:18 175.08781:5 219.07681:24	113748	108456	113628
148	0.956	57.36	220.982	w/o MS2:Dicamba; LC-ESI-ITFT; MS2; CE	[M-H]-	found in higher mz's MsMs_290	1	FALSE	null	220.977	C8H6Cl2O3	O-methoxybenzoic acids and derivatives	IWEDIXLBFLAXBO-UHFFFAOYSA-N	COC1=C(Cl)C=CC(Cl)=C1C(O)=O	3		FALSE	null	null	86.3	null	null	null	null	49.11	NEGIDA-3	220.9821:1448 221.98545:2086 222.98881:811		9631	9729	10656
149	0.956	57.36	221.999	w/o MS2:N4-Phthalylsulfathiazole	[M-H]-		1	TRUE	null	222	C17H13N3O5S2				3		FALSE	null	null	99	null	null	null	null	169.85	NEGIDA-3	221.99857:2310 223.00192:896 224.00528:641	132.01814:10 154.01195:48	14872	14906	14879
150	9.348	560.88	223.027	w/o MS2:Unknown (carbon number 10); PlaSMA ID-321	[M-H]-		1	TRUE	3.22	223.024	C10H8O6	NA			3		FALSE	null	null	94.8	99.8	null	null	null	34.3	NEGIDA-1	223.02698:2376 224.03033:533 225.03369:368	74.98769:2 109.0696:1 182.92455:4 223.02953:5	18737	20737	21943
151	8.968	538.08	223.027	Unknown	[M-H]-		1	TRUE	null	null	null	null	null	null	4		FALSE	null	null	null	null	null	null	null	23.74	NEGIDA-1	223.02711:1722 224.03046:324 225.03382:295	57.03176:1 149.00876:2 154.9021:2 162.89949:1 168.85645:2 176.9126:1 206.99388:2 223.03181:16	13415	13447	13679
152	10.942	656.52	223.028	Unknown	[M-H]-	similar chromatogram in higher mz_164; found in higher mz's MsMs_164	1	TRUE	null	null	null	null	null	null	4		FALSE	null	null	null	null	null	null	null	126.86	NEGIDA-1	223.02757:8528 224.03092:2622 225.03428:1768	74.98914:7 149.01251:12 207.00645:2 223.02814:25	64533	55626	59745
153	5.44	326.4	224.042	w/o MS2:Probenazole	[M-H]-		1	TRUE	null	224.038	C10H9NO3S				3		FALSE	null	null	89	null	null	null	null	54.55	NEGIDA-1	224.04243:1341 225.04578:149 226.04914:29	137.01147:4 137.02132:16 167.01393:4 167.01573:4 209.01505:4 209.02519:8 224.04092:20	7886	7366	8474
154	7.184	431.04	225.005	Unknown	[M-H]-		1	TRUE	null	null	null	null	null	null	4		FALSE	null	null	null	null	null	null	null	26.54	NEGIDA-2	225.00708:1534 226.01043:314 227.01379:191	116.95281:1 124.91154:1 178.92963:2 206.99837:1 208.97446:7 225.00758:4	14462	13172	15370
155	8.054	483.24	225.007	Unknown	[M-H]-		1	TRUE	null	null	null	null	null	null	4		FALSE	null	null	null	null	null	null	null	32.15	NEGIDA-3	225.00717:2213 226.01052:397 227.01388:307	118.94187:5 126.90209:7 178.92754:5 186.86285:2 208.97623:22 217.00964:2 225.00941:12	12354	12008	16256
156	1.028	61.68	225.098	w/o MS2:Tetramethyluric acid	[M-H]-		1	TRUE	null	225.098	C9H12N4O3				3		FALSE	null	null	100	null	null	null	null	250.05	NEGIDA-3	225.09824:9430 226.10159:2302 227.10495:186	59.01366:60 71.0161:36 80.03512:12 89.01923:12 89.02056:24 99.05679:10 110.07141:114 119.0402:10 137.03639:36 144.0607:10 154.06433:77 158.97536:10	68392	65840	68880
157	14.454	867.24	226.966	Unknown	[M-H]-		1	FALSE	null	null	null	null	null	null	4		FALSE	null	null	null	null	null	null	null	187.35	NEGIDA-2	226.96571:4907 227.96906:949 228.97242:1263		87356	92232	90730
158	13.513	810.78	227.202	w/o MS2:Myristic acid	[M-H]-		1	TRUE	null	227.202	C14H28O2	Long-chain fatty acids	TUNFSRHWOTWDNC-UHFFFAOYSA-N	CCCCCCCCCCCCCC(O)=O	2		FALSE	null	null	71.9	null	null	null	null	77.81	NEGIDA-2	227.20215:3181 228.2055:801 229.20886:51	71.00417:12 114.99097:36 227.20941:24	41839	36914	40165
159	14.817	889.02	228.94	Unknown	[M-H]-		1	FALSE	null	null	null	null	null	null	4		FALSE	null	null	null	null	null	null	null	34.5	NEGIDA-1	228.94034:1781 229.94369:36 230.94705:99		20219	18975	20122
160	0.956	57.36	229.011	w/o MS2:7-Hydroxy-4-(trifluoromethyl)coumarin	[M-H]-		0.667	FALSE	null	229.012	C10H5F3O3				3		FALSE	null	null	99.8	null	null	null	null	21.21	NEGIDA-2	229.0112:1069 230.01455:140 231.01791:62		8645	9284	8384
161	8.272	496.32	231.113	Melatonin	[M-H]-		1	TRUE	null	231.114	C13H16N2O2	3-alkylindoles	DRLFMBDRBRZALE-UHFFFAOYSA-N	OC(=NCCC1=CNC=2C=CC(OC)=CC21)C	2	2	FALSE	null	null	91.9	null	97.2	85.3	66.7	3089.38	NEGIDA-3	231.11485:60197 232.1182:16499 233.12156:1559	56.29385:2 58.02959:23 117.03603:5 118.04413:5 128.97058:2 144.04497:1057 145.05162:163 157.04781:5 157.05484:7 216.09113:611 231.11531:143	357150	370164	391255
162	12.247	734.82	233.153	w/o MS2:Putative_Alantolactone	[M-H]-		0.667	FALSE	null	233.154	C15H20O2	Eudesmanolides, secoeudesmanolides, and derivatives	PXOYOCNNSUAQNS-UHFFFAOYNA-N	CC1CCCC2(C)CC3OC(=O)C(=C)C3C=C12	3		FALSE	null	null	100	null	null	null	null	14.3	NEGIDA-2	233.15338:3028 234.15673:828 235.16009:178		52569	35930	49253
163	10.599	635.94	236.106	w/o MS2:1-(4-methoxyphenyl)isoquinoline	[M-H]-	found in higher mz's MsMs_232	1	TRUE	null	236.107	C16H13NO	Phenylpyridines	VRGXPRJRDIGSKC-UHFFFAOYSA-N	COC1=CC=C(C=C1)C1=NC=CC2=CC=CC=C12	3		FALSE	null	null	98.9	null	null	null	null	146.89	NEGIDA-2	236.1055:1521 237.10885:336 238.11221:20	63.95479:3 64.06924:3 64.1984:3 65.07451:3 65.17297:3 65.99186:3 66.10242:3 66.25759:3 66.3718:3 66.52156:3 66.64973:3 66.97531:3 67.09818:3 67.23611:3 67.35691:3 79.9586:3 148.00616:3 167.90176:3 183.06972:3 189.95709:3	9520	9403	9376
164	10.942	656.52	239.06	w/o MS2:C9H18OS3; PlaSMA ID-975	[M-H]-		1	TRUE	6.99	239.06	C9H18OS3	NA			3		FALSE	null	null	99.9	99.9	null	null	null	148.75	NEGIDA-1	239.06:7862 240.06335:2676 241.06671:2046	74.99157:32 78.96078:2 91.02299:10 116.95433:2 141.00967:2 149.00908:18 202.94046:2 207.00243:12 223.02814:149 238.8898:5	58219	48141	54441
165	1.075	64.5	239.114	Anserine	[M-H]-	similar chromatogram in higher mz_203; similar chromatogram in higher mz_310; similar chromatogram in higher mz_350; similar chromatogram in higher mz_352; similar chromatogram in higher mz_362; similar chromatogram in higher mz_385; similar chromatogram in higher mz_479; found in higher mz's MsMs_479	1	TRUE	null	239.115	C10H16N4O3	Hybrid peptides	MYYIAHXIVFADCU-UHFFFAOYNA-N	O=C(O)C(N=C(O)CCN)CC1=CN=CN1C	2	2	FALSE	null	null	86.5	null	88.6	81.9	50	243.63	NEGIDA-1	239.11414:9677 240.11749:2571 241.12085:300	132.99629:10 151.04813:36 166.09801:24 168.07222:124 178.09387:10 239.10873:12 239.11957:36	74218	73914	70445
166	4.222	253.32	241.083	w/o MS2:Thymidine	[M-H]-	found in higher mz's MsMs_228	1	TRUE	null	241.083	C10H14N2O5	Pyrimidine 2'-deoxyribonucleosides	IQFYYKKMVGJFEH-UHFFFAOYNA-N	O=C1N=C(O)C(=CN1C2OC(CO)C(O)C2)C	3	1	FALSE	null	null	99.9	null	null	null	null	824.36	NEGIDA-1	241.08336:60100 242.08671:15143 243.09007:2170	125.03703:121	425755	407258	405861
167	0.988	59.28	241.09	w/o MS2:Equol	[M-H]-		1	FALSE	null	241.087	C15H14O3	Isoflavanols	ADFCQWZHKCXPAJ-UHFFFAOYNA-N	OC1=CC=C(C=C1)C2COC3=CC(O)=CC=C3C2	3		FALSE	null	null	95.7	null	null	null	null	14.9	NEGIDA-3	241.08998:1109 242.09333:437 243.09669:46		7751	7431	7850
168	13.801	828.06	241.216	w/o MS2:Pentadecanoic acid	[M-H]-		1	TRUE	null	241.217	C15H30O2	Long-chain fatty acids	WQEPLUUGTLDZJY-UHFFFAOYSA-N	CCCCCCCCCCCCCCC(O)=O	2		FALSE	null	null	77.7	null	null	null	null	47.41	NEGIDA-1	241.21591:1411 242.21926:297 243.22262:58	225.02592:2 241.2142:5	21616	27679	29411
169	1.564	93.84	242.077	Cytidine	[M-H]-	similar chromatogram in higher mz_279	1	TRUE	null	242.078	C9H13N3O5	Pyrimidine nucleosides	UHDGCWIWMRVCDJ-UHFFFAOYNA-N	N=C1N=C(O)N(C=C1)C2OC(CO)C(O)C2O	2	2	FALSE	null	null	84.4	null	88	73.8	50	104.21	NEGIDA-1	242.07706:2207 243.08041:551 244.08377:202	109.03922:6	16947	16078	16022
170	9.53	571.8	242.175	w/o MS2:N-Nonanoyl-L-homoserine lactone	[M-H]-		1	TRUE	null	242.175	C13H23NO3				2		FALSE	null	null	65.5	null	null	null	null	53.38	NEGIDA-1	242.17526:1343 243.17861:164 244.18197:0	179.92702:1 222.43555:2 225.14835:4 226.03728:1 242.17178:5	7796	6647	7534
171	1.816	108.96	243.061	URIDINE	[M-H]-	found in higher mz's MsMs_446; found in higher mz's MsMs_230; found in higher mz's MsMs_214	1	TRUE	null	243.062	C9H12N2O6	Pyrimidine nucleosides	DRTQHJPVMGBUCF-UHFFFAOYNA-N	OCC1OC(C(O)C1O)N1C=CC(=O)NC1=O	2	2	FALSE	null	null	80.9	null	81.3	65.5	53.3	805.48	NEGIDA-3	243.06186:44441 244.06521:8422 245.06857:1402	71.00999:10 82.03085:24 110.01814:12 110.02696:85 111.02073:74 116.99522:12 117.00129:12 122.02383:24 122.02849:24 152.03044:24 200.06558:36	329861	307765	318752
172	3.188	191.28	243.064	w/o MS2:Ethoprophos	[M-H]-		1	TRUE	null	243.064	C8H19O2PS2				3		FALSE	null	null	100	null	null	null	null	278.84	NEGIDA-2	243.06377:16187 244.06712:1563 245.07048:219	78.9593:254 82.40453:3 225.0553:8 243.06258:12	152743	151065	148672
173	4.776	286.56	243.08	w/o MS2:Biotin	[M-H]-		1	FALSE	null	243.081	C10H16N2O3S	Biotin and derivatives	YBJHBAHKTGYVGT-UHFFFAOYNA-N	O=C(O)CCCCC1SCC2N=C(O)NC21	3		FALSE	null	null	99.3	null	null	null	null	32.59	NEGIDA-3	243.07973:2152 244.08308:251 245.08644:94		12972	14885	13205
174	4.365	261.9	243.081	Biotin; LC-ESI-QTOF; MS2; [M-H]-; CE	[M-H]-	found in higher mz's MsMs_461; found in higher mz's MsMs_455; found in higher mz's MsMs_447; found in higher mz's MsMs_351; found in higher mz's MsMs_349; found in higher mz's MsMs_291	1	TRUE	null	243.081	C10H16N2O3S	Biotin and derivatives	YBJHBAHKTGYVGT-ZKWXMUAHSA-N	OC(=O)CCCC[C@@H]1SC[C@@H]2N=C(O)N[C@H]12	2	2	FALSE	null	null	89.5	null	92.4	85.1	58.3	2421.96	NEGIDA-2	243.08124:137519 244.08459:30762 245.08795:14806	68.04784:36 71.99181:10 122.09027:12 122.09337:131 136.06558:12 156.07732:12 156.08958:48 166.08504:262 169.04057:10 197.10466:12 199.09836:36 200.0732:290 243.08246:977	1010474	993016	941840
175	11.765	705.9	245.175	w/o MS2:Diethyl azelate	[M-H]-		1	TRUE	null	245.175	C13H24O4				3		FALSE	null	null	100	null	null	null	null	340.3	NEGIDA-2	245.17494:4743 246.17829:1421 247.18165:228	102.9539:10 152.95912:12	32522	33813	33589
176	14.704	882.24	245.965	Unknown	[M-H]-	similar chromatogram in higher mz_188	1	TRUE	null	null	null	null	null	null	4		FALSE	null	null	null	null	null	null	null	348.18	NEGIDA-1	245.9648:7105 246.96815:419 247.97151:37	145.96683:10 158.95168:12 167.96646:10 172.94867:12 185.8824:10 193.95123:12 202.96201:24 206.93741:12 245.96201:12	91826	90021	88898
177	0.98	58.8	247.035	w/o MS2:Pesticide1_Dimethoate_C5H12NO3PS2_Phosphorodithioic acid, O,O-dimethyl S-[2-(methylamino)-2-oxoethyl] ester	[M-H]-		1	FALSE	null	247.033	C5H12NO3PS2	Dithiophosphate O-esters	MCWXGJITAZMZEV-UHFFFAOYSA-N	COP(=S)(OC)SCC(O)=NC	3		FALSE	null	null	99.2	null	null	null	null	40.05	NEGIDA-1	247.03471:1664 248.03806:342 249.04142:311		11022	10417	10616
178	11.232	673.92	248.079	w/o MS2:Benzenesulfonic acid, dodecyl(sulfophenoxy)-	[M-H]-	similar chromatogram in higher mz_459	1	TRUE	null	248.08	C24H34O7S2				3		FALSE	null	null	99	null	null	null	null	204.78	NEGIDA-1	248.0786:3066 249.08195:370 250.08531:14	74.01691:2 79.95698:7 148.05498:2 153.45496:2 167.95009:2 177.50443:5 184.0018:49 196.01534:5 219.04303:2 248.07806:10	45112	43588	43146
179	0.964	57.84	248.96	w/o MS2:Trifluoroacetic acid	[M-H]-		1	FALSE	null	248.96	C2HF3O2				3		FALSE	null	null	99.7	null	null	null	null	35.19	NEGIDA-3	248.95966:1688 249.96301:258 250.96637:225		10758	10190	10829
180	8.532	511.92	249.032	w/o MS2:Diphenylphosphate	[M-H]-		1	TRUE	null	249.032	C12H11O4P	Aryl phosphodiesters	ASMQGLCHMVWBQR-UHFFFAOYSA-N	C1=CC=C(C=C1)OP(O)(=O)OC2=CC=CC=C2	2		FALSE	null	null	65.7	null	null	null	null	150.32	NEGIDA-1	249.03218:2764 250.03553:272 251.03889:61	57.03712:1 93.0302:13 140.89795:4 154.99828:2 158.91293:2 248.95607:5 248.97156:64 249.03575:17	36614	32774	31033
181	12.701	762.06	250.144	w/o MS2:4-Coumaroylcholine; LC-ESI-QTOF; MS2; CE	[M-H]-		1	TRUE	null	250.143	C14H20NO3	Coumaric acid esters	WRLCNNSWESNISL-UHFFFAOYSA-O	C[N+](C)(C)CCOC(=O)C=CC1=CC=C(O)C=C1	2		FALSE	null	null	73.3	null	null	null	null	27.54	NEGIDA-2	250.14424:2657 251.14759:780 252.15095:79	216.14067:1 234.10999:2 249.96829:5 250.03703:5 250.14127:47	30085	32845	33295
182	13.688	821.28	253.217	9-Trans-Palmitelaidic acid	[M-H]-		1	TRUE	null	253.217	C16H30O2	Long-chain fatty acids	SECPZKHBENQXJG-BQYQJAHWSA-N	CCCCCC\C=C\CCCCCCCC(O)=O	2		FALSE	null	null	85.8	null	88	79.1	50	149.98	NEGIDA-3	253.21677:3312 254.22012:876 255.22348:3175	253.22058:11	39081	36754	39905
183	7.098	425.88	255.088	w/o MS2:Unknown (carbon number 12); PlaSMA ID-1101	[M-H]-	similar chromatogram in higher mz_347; found in higher mz's MsMs_347; similar chromatogram in higher mz_400; found in higher mz's MsMs_400; found in higher mz's MsMs_393; similar chromatogram in higher mz_393; similar chromatogram in higher mz_418	1	TRUE	4.91	255.088	C12H14O6	NA			3		FALSE	null	null	100	100	null	null	null	257.85	NEGIDA-2	255.08824:10953 256.09159:3061 257.09495:283	140.93297:4 168.90042:3 178.89384:4 192.90015:4 197.05963:8 200.9095:4 240.05722:8 255.09444:29	73711	74322	73300
184	14.154	849.24	255.232	Palmitic acid (NMR)	[M-H]-	found in higher mz's MsMs_482; found in higher mz's MsMs_462; found in higher mz's MsMs_428; found in higher mz's MsMs_414; found in higher mz's MsMs_368; found in higher mz's MsMs_367; found in higher mz's MsMs_342; found in higher mz's MsMs_285	1	TRUE	null	255.233	C16H32O2	Long-chain fatty acids	IPCSVZSSVZVIGE-UHFFFAOYSA-N	CCCCCCCCCCCCCCCC(O)=O	2		FALSE	null	null	85.7	null	88	79.1	50	813.84	NEGIDA-2	255.23219:60995 256.23554:15745 257.2389:1876	255.2316:134	591933	624789	593034
185	1.005	60.3	255.988	Unknown	[M-H]-		1	FALSE	null	null	null	null	null	null	4		FALSE	null	null	null	null	null	null	null	74.85	NEGIDA-3	255.98811:1414 256.99146:261 257.99482:1012		10078	8803	11204
186	10.131	607.86	256.192	N-Decanoyl-L-homoserine lactone	[M-H]-		1	TRUE	null	256.191	C14H25NO3				2		FALSE	null	null	85.6	null	75	75	100	66.18	NEGIDA-2	256.1925:1594 257.19585:184 258.19921:20	256.23883:6	8541	8944	8736
187	0.948	56.88	259.021	D-Glucose 6-phosphate; LC-ESI-QTOF; MS2; CE	[M-H]-	found in higher mz's MsMs_396; found in higher mz's MsMs_290	1	TRUE	null	259.022	C6H13O9P	Hexose phosphates	NBSCHQHZLSJFNQ-GASJEMHNSA-N	OC1O[C@H](COP(O)(O)=O)[C@@H](O)[C@H](O)[C@H]1O	2	2	FALSE	null	null	93.3	null	86.7	90.2	100	472.78	NEGIDA-3	259.02148:41846 260.02483:5174 261.02819:1315	78.72295:12 78.96081:669 96.96975:589 138.98029:60 198.994:12 212.94263:10 259.02078:65	367333	377641	367772
188	14.712	882.72	260.442	Unknown	[M-H]-		1	FALSE	null	null	null	null	null	null	4		FALSE	null	null	null	null	null	null	null	231.38	NEGIDA-1	260.44202:1827 261.44537:69 262.44873:0		19011	19114	19159
189	14.671	880.26	260.871	w/o MS2:Sulfuric acid	[M-H]-		1	FALSE	null	260.873	H2O4S				3		FALSE	null	null	97.6	null	null	null	null	32.16	NEGIDA-3	260.87109:1161 261.87444:9 262.8778:219		10209	10376	10502
190	4.229	253.74	263.066	w/o MS2:Cinoxacin	[M-H]-		1	TRUE	null	263.066	C12H10N2O5				3		FALSE	null	null	100	null	null	null	null	43.94	NEGIDA-1	263.06616:1475 264.06951:234 265.07287:49	94.03007:10 112.93691:10 148.03676:10 150.93806:10 190.97505:10 218.9525:10	9840	9089	9466
191	5.473	328.38	264.033	Unknown	[M-H]-	similar chromatogram in higher mz_270	0.667	TRUE	null	null	null	null	null	null	4		FALSE	null	null	null	null	null	null	null	19.24	NEGIDA-1	264.03763:1032 265.04098:282 266.04434:81	64.00284:10 164.02942:24 179.05338:24	7020	7178	7861
192	4.365	261.9	265.062	w/o MS2:2',2'-Difluoro-2'-deoxyuridine; LC-ESI-ITFT; MS2; CE	[M-H]-	found in higher mz's MsMs_455; found in higher mz's MsMs_291	1	TRUE	null	265.063	C9H10F2N2O5	Pyrimidine 2'-deoxyribonucleosides	FIRDBEQIJQERSE-QPPQHZFASA-N	OC[C@H]1O[C@@H](N2C=CC(O)=NC2=O)C(F)(F)[C@@H]1O	2		FALSE	null	null	68.5	null	null	null	null	138.92	NEGIDA-1	265.06201:4767 266.06536:778 267.06872:576	148.95401:3 167.0154:4 196.04485:3 219.06177:8 221.07573:8 265.06363:16	40711	37158	37091
193	12.067	724.02	265.149	C12-AS (TENTATIVE)	[M-H]-	similar chromatogram in higher mz_301; found in higher mz's MsMs_301; similar chromatogram in higher mz_323; found in higher mz's MsMs_323	1	TRUE	null	265.148	C12H26O4S	Sulfuric acid monoesters	MOTZDAYCYVMXPC-UHFFFAOYSA-N	CCCCCCCCCCCCOS(O)(=O)=O	2		FALSE	null	null	91.3	null	84	85.3	100	679.93	NEGIDA-3	265.14859:23177 266.15194:6872 267.1553:2916	96.9613:153 264.31995:4 265.146:192	200984	211998	187937
194	4.566	273.96	266.089	Adenosine	[M-H]-		1	TRUE	null	266.089	C10H13N5O4	Purine nucleosides	OIRDTQYFTABQOQ-KQYNXXCUSA-N	NC1=C2N=CN([C@@H]3O[C@H](CO)[C@@H](O)[C@H]3O)C2=NC=N1	2	2	FALSE	null	null	88.2	null	93.9	73	66.7	316.6	NEGIDA-3	266.08881:4969 267.09216:1357 268.09552:120	107.03789:24 134.04671:155	34003	34623	34185
195	1.052	63.12	267.047	w/o MS2:Homocystine	[M-H]-		1	TRUE	null	267.048	C8H16N2O4S2	Alpha amino acids	ZTVZLYBCZNMWCF-UHFFFAOYNA-N	O=C(O)C(N)CCSSCCC(N)C(=O)O	2		FALSE	null	null	70.1	null	null	null	null	134.77	NEGIDA-1	267.04715:6132 268.0505:1284 269.05386:1618	70.99687:24 88.01997:36 114.98463:76 132.01286:12	50968	49326	49031
196	2.885	173.1	267.073	Inosine; LC-ESI-QTOF; MS2; CE	[M-H]-		1	TRUE	null	267.073	C10H12N4O5	Purine nucleosides	UGQMRVRMYYASKQ-KQYNXXCUSA-N	OC[C@H]1O[C@H]([C@H](O)[C@@H]1O)N1C=NC2=C1N=CN=C2O	2	2	FALSE	null	null	96.6	null	93.8	94.3	100	485.52	NEGIDA-3	267.07324:22268 268.07659:4454 269.07995:592	61.99156:1 80.02503:10 92.02407:53 104.97301:1 108.02247:58 134.02072:4 135.03088:744 149.04872:5 177.04018:2 204.93163:2 267.07318:143	131026	129818	134679
197	11.765	705.9	267.158	w/o MS2:NCGC00385871-01_C15H22O4_2,8-Dihydroxy-5,5,8-trimethyl-11-oxatetracyclo[7.3.1.0~1,9~.0~3,7~]tridecan-10-one	[M-H]-	found in higher mz's MsMs_427	1	TRUE	null	267.159	C15H22O4	Diterpenoids	VXHVLJHZFYIFJE-UHFFFAOYNA-N	CC1(C)CC2C(C1)C(C)(O)C13CC1(COC3=O)C2O	3		FALSE	null	null	99	null	null	null	null	51.93	NEGIDA-3	267.15765:1475 268.161:437 269.16436:126	154.91805:10 199.16991:24	9793	10181	11108
198	13.967	838.02	267.233	w/o MS2:cis-10-Heptadecenoic acid	[M-H]-		1	TRUE	null	267.233	C17H32O2				3		FALSE	null	null	100	null	null	null	null	97.75	NEGIDA-3	267.23325:1535 268.2366:277 269.23996:405	86.99684:4 130.98869:2 252.05515:2 267.22174:2	24042	21925	25645
199	14.604	876.24	268.985	Unknown	[M-H]-		1	TRUE	null	null	null	null	null	null	4		FALSE	null	null	null	null	null	null	null	69.36	NEGIDA-1	268.9856:3364 269.98895:174 270.99231:116	121.98666:10 128.97235:12 150.97914:10 171.97281:12 188.94121:12 202.98433:10 214.97133:12 226.9767:10 230.96428:12	53689	53833	55259
200	1.027	61.62	269.031	Unknown	[M-H]-		0.333	FALSE	null	null	null	null	null	null	4		FALSE	null	null	null	null	null	null	null	20.06	NEGIDA-1	269.03079:1101 270.03414:213 271.0375:55		9335	7852	7484
201	11.873	712.38	269.211	w/o MS2:(Z)-3-Hydroxyhexadec-7-enoic acid (NMR)	[M-H]-		0.667	TRUE	null	269.212	C16H30O3	Long-chain fatty acids	CBHANIXDPMXBGZ-KTKRTIGZNA-N	CCCCCCCC\C=C/CCCC(O)CC(O)=O	3		FALSE	null	null	98.8	null	null	null	null	57.23	NEGIDA-3	269.21066:1534 270.21401:354 271.21737:36	78.95445:1 88.98849:2 89.02554:2 132.97838:2 181.15562:2 214.97733:5 269.21738:7	14622	13797	14554
202	14.407	864.42	269.247	Heptadecanoic acid	[M-H]-		1	TRUE	null	269.249	C17H34O2	Long-chain fatty acids	KEMQGTRYUADPNZ-UHFFFAOYSA-N	CCCCCCCCCCCCCCCCC(O)=O	2		FALSE	null	null	80.9	null	75	77.8	50	69.93	NEGIDA-1	269.24734:1975 270.25069:413 271.25405:70	88.99242:2 125.07282:1 208.98831:1 269.20346:2 269.24487:9	27519	26697	29033
203	1.075	64.5	270.107	w/o MS2:3-(Dimethylamino)-7-(methylamino)phenothiazin-5-ium	[M-H]-	found in higher mz's MsMs_229	1	TRUE	null	270.106	C15H16N3S				3		FALSE	null	null	99.6	null	null	null	null	127.31	NEGIDA-1	270.10678:1318 271.11013:306 272.11349:51	135.0632:10 163.98456:10 173.94086:10 179.0553:10 206.91156:10 250.93852:10 270.26108:10	11662	11647	12037
204	10.675	640.5	270.206	w/o MS2:NCGC00179704-03!2-(8-hydroxy-4a,8-dimethyl-1,2,3,4,5,6,7,8a-octahydronaphthalen-2-yl)prop-2-enoic acid	[M-H]-	similar chromatogram in higher mz_302	1	TRUE	null	270.206	C15H24O3	Eudesmane, isoeudesmane or cycloeudesmane sesquiterpenoids	FXKCXGBBUBCRPU-UHFFFAOYNA-N	CC1(O)CCCC2(C)CCC(CC12)C(=C)C(O)=O	3		FALSE	null	null	100	null	null	null	null	183.62	NEGIDA-2	270.20615:2286 271.2095:703 272.21286:54	71.99916:5 98.00558:5 110.02269:5 115.03761:5 123.05952:5 159.99352:5 165.9536:5 195.69597:5 251.87051:5 270.08612:5	13604	14680	14434
205	12.279	736.74	271.226	w/o MS2:16-Hydroxyhexadecanoic acid; LC-ESI-QTOF; MS2; CE	[M-H]-		1	TRUE	null	271.228	C16H32O3	Long-chain fatty acids	UGAGPNKCDRTDHP-UHFFFAOYSA-N	OCCCCCCCCCCCCCCCC(O)=O	3		FALSE	null	null	97.8	null	null	null	null	101.64	NEGIDA-3	271.22577:1330 272.22912:207 273.23248:0	113.00975:5 156.99883:5 271.08246:5 271.22565:5	17325	17217	19262
206	14.478	868.68	272.958	Unknown	[M-H]-		1	FALSE	null	null	null	null	null	null	4		FALSE	null	null	null	null	null	null	null	42.07	NEGIDA-3	272.95816:1901 273.96151:739 274.96487:872		22487	35395	29929
207	14.868	892.08	274.996	w/o MS2:Thymol blue	[M-H]-		0.333	TRUE	null	275	C27H30O5S				3		FALSE	null	null	93.7	null	null	null	null	239.74	NEGIDA-2	274.9964:11242 275.99975:880 277.00311:390	67.02332:12 96.96825:10 100.98225:219 101.93864:10 111.00739:134 142.98326:12 146.98883:12 147.00073:275 149.00211:24 163.00354:36 172.9913:10 190.99399:145 192.98975:24 234.98003:623	127037	114796	117098
208	0.932	55.92	275.018	w/o MS2:6-Phosphogluconic acid	[M-H]-		1	TRUE	null	275.017	C6H13O10P				2	1	FALSE	null	null	76.6	null	null	null	null	117.76	NEGIDA-2	275.01776:5649 276.02111:650 277.02447:211	78.95686:48 78.96683:12 96.96948:48 131.04456:10 167.04794:12 256.99484:12 275.01001:12	66593	76744	68983
209	4.222	253.32	277.059	w/o MS2:Sulfabenzamide	[M-H]-		1	TRUE	null	277.064	C13H12N2O3S				3		FALSE	null	null	85.9	null	null	null	null	112.28	NEGIDA-3	277.05856:4956 278.06191:1214 279.06527:3469	192.9391:10	33413	32744	33545
210	0.98	58.8	277.072	w/o MS2:teadenol A	[M-H]-		1	TRUE	null	277.071	C14H12O6	1-benzopyrans	BXYXWVCTYIQPAI-UHFFFAOYNA-N	OC(=O)C1=CC(=C)C2OC3=CC(O)=CC(O)=C3CC2O1	3		FALSE	null	null	99.5	null	null	null	null	40.77	NEGIDA-1	277.07169:1971 278.07504:546 279.0784:349	115.01464:10 157.02655:10 187.04666:10 277.07208:10	13160	11795	10637
211	11.061	663.66	277.145	w/o MS2:Mono-n-octyl phthalate	[M-H]-		1	TRUE	null	277.144	C16H22O4				3		FALSE	null	null	99.9	null	null	null	null	188.43	NEGIDA-3	277.14493:4320 278.14828:1043 279.15164:180	77.03839:6 107.05212:5 119.10104:5 134.03824:6 144.94536:12 158.94125:6 162.9552:12 208.96619:5 277.14502:6	29758	28554	30675
212	12.255	735.3	277.185	C14-SAS (TENTATIVE)	[M-H]-		1	TRUE	null	277.184	C14H30O3S	Organosulfonic acids	MZBFYGYTZIZFQC-UHFFFAOYNA-N	CCCCCCCC(CCCCCC)S(O)(=O)=O	2		FALSE	null	null	83.5	null	73.5	85.9	66.7	190.92	NEGIDA-3	277.18207:4194 278.18542:1020 279.18878:348	79.95828:27 113.0111:2 144.94356:5 162.95508:7 234.15717:2 277.18448:45	71337	68491	70356
213	13.523	811.38	277.217	9-Oxo-10E,12Z-octadecadienoic acid	[M-H]-		1	TRUE	null	277.216	C18H30O3				2		FALSE	null	null	85.8	null	75	75	100	108.55	NEGIDA-3	277.21747:1662 278.22082:488 279.22418:508	277.22192:5	23678	22459	24388
214	1.816	108.96	279.036	Unknown	[M-H]-		1	TRUE	null	null	null	null	null	null	4		FALSE	null	null	null	null	null	null	null	39.09	NEGIDA-1	279.03644:3840 280.03979:782 281.04315:2450	111.02048:24 122.02511:10 192.98744:48 217.0052:10	27773	26032	26668
215	13.818	829.08	279.232	Pinolenic acid	[M-H]-		1	TRUE	null	279.232	C18H30O2				2		FALSE	null	null	81	null	59.7	75	100	404.07	NEGIDA-1	279.23175:8812 280.2351:2831 281.23846:1847	192.98607:10 258.97787:5 279.23187:45	135789	129253	130508
216	14.65	879	279.459	Unknown	[M-H]-		0.333	FALSE	null	null	null	null	null	null	4		FALSE	null	null	null	null	null	null	null	131.18	NEGIDA-2	279.45868:1089 280.46203:64 281.46539:9		11954	12827	12379
217	5.717	343.02	280.104	w/o MS2:N6-Methyladenosine	[M-H]-		1	TRUE	null	280.105	C11H15N5O4	Purine nucleosides	VQAYFKKCNSOZKM-UHFFFAOYNA-N	OCC1OC(N2C=NC=3C(=NC=NC32)NC)C(O)C1O	2		FALSE	null	null	76.7	null	null	null	null	1634.89	NEGIDA-3	280.10406:19629 281.10741:4374 282.11077:430	92.03202:12 133.0368:101 134.88406:10 148.06219:602	129053	128968	133403
218	1.893	113.58	280.104	w/o MS2:1-Methyladenosine	[M-H]-	similar chromatogram in higher mz_491; similar chromatogram in higher mz_466; similar chromatogram in higher mz_289	1	TRUE	null	280.105	C11H15N5O4	Purine nucleosides	GFYLSDSUCHVORB-UHFFFAOYNA-N	N=C1C=2N=CN(C2N=CN1C)C3OC(CO)C(O)C3O	3	1	FALSE	null	null	99.6	null	null	null	null	168.1	NEGIDA-3	280.10425:2088 281.1076:487 282.11096:38	148.06033:36	14796	14862	15477
219	0.956	57.36	281.004	w/o MS2:Luciferin	[M-H]-	found in higher mz's MsMs_290	1	TRUE	null	281.005	C11H8N2O3S2				3		FALSE	null	null	99.5	null	null	null	null	62	NEGIDA-2	281.00391:2951 282.00726:635 283.01062:217	96.67278:12 112.9827:10	18689	20534	18535
220	4.365	261.9	281.036	Unknown	[M-H]-	found in higher mz's MsMs_461; found in higher mz's MsMs_291	1	TRUE	null	null	null	null	null	null	4		FALSE	null	null	null	null	null	null	null	30.08	NEGIDA-1	281.03659:1361 282.03994:265 283.0433:471	156.92299:10 243.07591:10 281.0481:24	11683	11678	10373
221	14.298	857.88	281.248	Oleic acid	[M-H]-	found in higher mz's MsMs_320	1	TRUE	null	281.249	C18H34O2	Long-chain fatty acids	ZQPPMHVWECSIRJ-KTKRTIGZSA-N	CCCCCCCC\C=C/CCCCCCCC(O)=O	2		FALSE	null	null	85.3	null	88	77.1	50	544.07	NEGIDA-1	281.24838:24859 282.25173:7369 283.25509:6522	281.2486:48	281326	276495	290184
222	3.011	180.66	282.084	Guanosine	[M-H]-	found in higher mz's MsMs_322; similar chromatogram in higher mz_475; found in higher mz's MsMs_475; similar chromatogram in higher mz_256	1	TRUE	null	282.084	C10H13N5O5	Purine nucleosides	NYHBQMYGNKIUIF-UHFFFAOYNA-N	N=C1N=C(O)C=2N=CN(C2N1)C3OC(CO)C(O)C3O	2	2	FALSE	null	null	95.4	null	90.8	93.2	100	5680.6	NEGIDA-3	282.08377:91921 283.08712:19826 284.09048:3212	76.95479:10 101.17695:10 107.03047:12 107.03482:79 108.0223:425 133.01738:1124 149.58147:24 150.04324:2884 246.04836:10 282.08188:60	653295	643207	671210
223	7.273	436.38	283.081	w/o MS2:4-Fluoro-2-methoxyphenol	[M-H]-	found in higher mz's MsMs_345	1	TRUE	null	283.079	C7H7FO2				3		FALSE	null	null	96.3	null	null	null	null	21.96	NEGIDA-3	283.08145:1336 284.0848:321 285.08816:375	145.62323:1 162.95877:2 220.91333:1 241.07088:2	7694	7487	7981
224	11.773	706.38	283.138	w/o MS2:Lys-Asn	[M-H]-		1	TRUE	null	283.138	C10H20N4O4				3		FALSE	null	null	100	null	null	null	null	26.05	NEGIDA-3	283.13773:1532 284.14108:470 285.14444:222	128.01849:10 183.00853:12 240.0856:10 283.13797:48	14458	13073	14595
225	13.452	807.12	283.264	Stearic acid	[M-H]-	found in higher mz's MsMs_470; found in higher mz's MsMs_448; found in higher mz's MsMs_398; found in higher mz's MsMs_324; found in higher mz's MsMs_379	1	TRUE	null	283.264	C18H36O2	Long-chain fatty acids	QIQXTHQIDYTFRH-UHFFFAOYSA-N	CCCCCCCCCCCCCCCCCC(O)=O	2		FALSE	null	null	84.5	null	88	75	50	949.65	NEGIDA-1	283.26276:54332 284.26611:15231 285.26947:1850	265.24896:10 283.26535:261	931775	1008113	1059962
226	1.308	78.48	283.907	Unknown	[M-H]-		0.667	TRUE	null	null	null	null	null	null	4		FALSE	null	null	null	null	null	null	null	41.41	NEGIDA-3	283.90738:1184 284.91073:299 285.91409:1110	201.90517:5 247.91777:6	9599	10427	11416
227	12.582	754.92	285.242	w/o MS2:Glycerol 1-myristate	[M-H]-		0.333	TRUE	null	285.242	C17H34O4				3		FALSE	null	null	100	null	null	null	null	84.33	NEGIDA-2	285.24225:1054 286.2456:186 287.24896:46	222.00951:2 223.03255:12 285.24731:12	11633	10509	10290
228	4.222	253.32	287.087	w/o MS2:N-Acetylaspartylglutamic acid	[M-H]-		1	TRUE	null	287.087	C11H16N2O8				3		FALSE	null	null	100	null	null	null	null	463.48	NEGIDA-3	287.08746:18284 288.09081:5036 289.09417:1748	114.98627:5 125.03683:30 151.04628:18 232.88855:5 241.08174:368	125224	119010	123947
229	1.075	64.5	288.12	OPHTHALMIC ACID	[M-H]-		1	TRUE	null	288.12	C11H19N3O6	Peptoid-peptide hybrids	SPLUHYDIQKURQW-UHFFFAOYNA-N	CCC(N)C(=O)N(CC(O)=O)C(=O)CCC(N)C(O)=O	2	2	FALSE	null	null	87.3	null	91.1	82.7	47.7	2739.57	NEGIDA-2	288.11963:29624 289.12298:8196 290.12634:1329	68.05255:10 74.02666:81 98.06234:12 100.03738:24 102.05761:24 110.06223:12 112.04118:24 115.08556:48 125.06664:36 127.05385:24 128.03745:88 139.0909:24 141.06284:102 146.03986:24 151.08247:24 151.08937:48 157.10242:10 159.07564:86 161.3942:10 169.09547:36 185.04031:12 185.05939:24 195.07811:182 208.11552:24 224.01549:10 226.12584:48 270.11563:95 288.12241:105	279027	273273	271046
230	1.816	108.96	289.065	w/o MS2:Orotidine	[M-H]-		1	TRUE	null	289.067	C10H12N2O8				3		FALSE	null	null	98.7	null	null	null	null	92.23	NEGIDA-1	289.06497:3959 290.06832:1121 291.07168:842	66.03151:12 82.02953:48 110.01807:24 110.02689:189 111.01918:228 120.0411:24 122.02065:36 140.02696:12 140.03526:48 152.02168:12 152.03552:73 153.02629:24 200.06148:127 243.04553:12 243.06522:374	28547	26969	27389
231	12.595	755.7	291.199	w/o MS2:FA 18:4+1O; PlaSMA ID-539	[M-H]-		1	TRUE	9.5	291.194	C18H28O3	Prostaglandins and related compounds	IYEHRWJNUWAXAD-UHFFFAOYNA-N	O=C(O)CCCCCCCC1C(=O)C=CC1(CC=CCC)	2		FALSE	null	null	76.2	100	null	null	null	493.39	NEGIDA-2	291.19928:6446 292.20263:1331 293.20599:778	79.95224:5 79.95725:35 108.99392:2 291.20218:61	77056	82032	75736
232	10.599	635.94	293.175	w/o MS2:NCGC00384680-01_C17H24O4_Bicyclo[7.2.0]undec-4-en-3-one, 11-[(acetyloxy)methyl]-4-(hydroxymethyl)-11-methyl-8-methylene-, (1R,4Z,9S)-	[M-H]-		1	TRUE	null	293.175	C17H24O4	Sesquiterpenoids	KAMJEJATROMPAT-UHFFFAOYNA-N	CC(=O)OCC1(C)CC2C1CC(=O)C(CO)=CCCC2=C	3		FALSE	null	null	100	null	null	null	null	349.84	NEGIDA-2	293.17496:9820 294.17831:2833 295.18167:382	143.00047:3 163.1133:3 192.1107:9 204.10338:3 205.11848:12 220.14549:56 221.14964:118 230.98621:9 236.10434:56	58772	61025	60033
233	12.758	765.48	293.177	w/o MS2:Thioperamide	[M-H]-		1	TRUE	null	293.179	C15H24N4S				2		FALSE	null	null	76.6	null	null	null	null	981.29	NEGIDA-3	293.17703:9511 294.18038:3367 295.18374:1231	89.02314:2 96.95881:42 118.96362:2 144.94402:2 157.00087:5 164.08545:1 225.01425:1 230.98392:4 232.98546:5 252.98709:2 293.17773:56	84371	100354	87788
234	14.441	866.46	294.953	Unknown	[M-H]-		0.667	FALSE	null	null	null	null	null	null	4		FALSE	null	null	null	null	null	null	null	52.17	NEGIDA-1	294.95312:2761 295.95648:505 296.95984:591		50203	30934	34944
235	12.856	771.36	295.226	w/o MS2:9-Oxo-10E,12Z-octadecadienoic acid	[M-H]-		1	TRUE	null	295.227	C18H30O3				2		FALSE	null	null	62.4	null	null	null	null	114.28	NEGIDA-2	295.2262:1611 296.22955:393 297.23291:1280	70.99934:8 111.01331:1 113.0962:1 114.9878:38 158.98193:21 169.16299:4 295.23138:8	31838	34110	38596
236	6.719	403.14	296.082	5'-S-Methylthioadenosine; LC-ESI-QTOF; MS2; CE	[M-H]-		1	TRUE	null	296.082	C11H15N5O3S	5'-deoxy-5'-thionucleosides	WUUGFSXJNOTRMR-IOSLPCCCSA-N	CSC[C@H]1O[C@H]([C@H](O)[C@@H]1O)N1C=NC2=C(N)N=CN=C12	2	2	FALSE	null	null	88.1	null	93.2	73.3	66.7	512.1	NEGIDA-2	296.08224:9841 297.08559:2538 298.08895:1059	107.04053:12 134.04637:255	57028	61384	56865
237	14.844	890.64	296.98	w/o MS2:Dithianone	[M-H]-		0.333	TRUE	null	296.979	C14H4N2O2S2				3		FALSE	null	null	98.7	null	null	null	null	52.16	NEGIDA-2	296.98035:2390 297.9837:297 298.98706:231	103.01633:10 169.0063:10 296.9451:12	23035	24999	24902
238	0.956	57.36	296.998	w/o MS2:PtdIns-(1,2-dioctanoyl)	[M-H]-		1	FALSE	null	297	C25H47O13P				3		FALSE	null	null	97.3	null	null	null	null	28.28	NEGIDA-2	296.99765:1365 298.001:280 299.00436:203		10213	10292	9859
239	11.054	663.24	297.048	Unknown	[M-H]-		1	TRUE	null	null	null	null	null	null	4		FALSE	null	null	null	null	null	null	null	34.67	NEGIDA-1	297.04877:1803 298.05212:810 299.05548:445	142.95845:3 149.0076:6 184.02342:3 269.99188:3 281.00681:6 297.04465:6	18551	18383	22406
240	9.717	583.02	297.149	w/o MS2:NCGC00347453-02!(E)-1,7-bis(4-hydroxyphenyl)hept-4-en-3-one	[M-H]-	found in higher mz's MsMs_332; similar chromatogram in higher mz_389; found in higher mz's MsMs_389; similar chromatogram in higher mz_377; similar chromatogram in higher mz_298; found in higher mz's MsMs_298; similar chromatogram in higher mz_406; similar chromatogram in higher mz_381; similar chromatogram in higher mz_332; similar chromatogram in higher mz_422; similar chromatogram in higher mz…	1	FALSE	null	297.149	C19H20O3	Linear diarylheptanoids	GIKJADRKBZHVCY-UHFFFAOYSA-N	OC1=CC=C(CCC=CC(=O)CCC2=CC=C(O)C=C2)C=C1	3		FALSE	null	null	99.8	null	null	null	null	24.57	NEGIDA-1	297.1492:1160 298.15255:353 299.15591:533		8286	7410	7024
241	12.151	729.06	297.154	w/o MS2:C10-LAS (TENTATIVE)	[M-H]-	found in higher mz's MsMs_356; found in higher mz's MsMs_336; found in higher mz's MsMs_328	1	TRUE	null	297.153	C16H26O3S	Benzenesulfonic acids and derivatives	NANHIUZYPFDGJS-UHFFFAOYNA-N	CCCCCCC(CCC)C1=CC=C(C=C1)S(O)(=O)=O	2		FALSE	null	null	78.4	null	null	null	null	1306.4	NEGIDA-1	297.15396:70171 298.15731:18083 299.16067:6706	119.05036:60 170.00102:24 183.01384:648 184.017:24 197.03177:24 216.18791:10 297.15225:930	636177	558762	595072
242	13.242	794.52	297.242	w/o MS2:FA 18:1+1O; PlaSMA ID-584	[M-H]-		0.333	FALSE	10.08	297.242	C18H34O3	Long-chain fatty acids	WBHHMMIMDMUBKC-UHFFFAOYNA-N	O=C(O)CCCCCCCC=CCC(O)CCCCCC	3		FALSE	null	null	99.9	100	null	null	null	116.65	NEGIDA-3	297.24167:2898 298.24502:804 299.24838:530		45215	43739	52691
243	3.096	185.76	297.938	Unknown	[M-H]-		1	TRUE	null	null	null	null	null	null	4		FALSE	null	null	null	null	null	null	null	81.37	NEGIDA-1	297.9379:1535 298.94125:351 299.94461:3229	72.00726:12 147.03964:6 147.04305:18 164.07584:24 169.89865:12 217.97948:5 261.96954:24	11998	11077	11658
244	11.765	705.9	298.273	w/o MS2:Spiroxamine	[M-H]-		1	TRUE	null	298.274	C18H35NO2				3		FALSE	null	null	99.7	null	null	null	null	380.66	NEGIDA-2	298.27325:3281 299.2766:1298 300.27996:135	253.06978:10 283.69824:12	21224	23250	22945
245	13.264	795.84	299.2	w/o MS2:(+/-)-11-Hydroxy-5Z,8Z,12E,14Z,17Z-eicosapentaenoic acid	[M-H]-		1	TRUE	null	299.202	C20H30O3				2		FALSE	null	null	78.7	null	null	null	null	183.06	NEGIDA-1	299.2002:3607 300.20355:1283 301.20691:298	239.12329:2 299.20822:29	36277	33289	36370
246	13.01	780.6	299.257	w/o MS2:3-Hydroxyoctadecanoic Acid	[M-H]-		1	TRUE	null	299.259	C18H36O3				2		FALSE	null	null	77.3	null	null	null	null	134.37	NEGIDA-1	299.25665:2381 300.26:678 301.26336:57	161.00075:1 192.98787:1 253.21863:5 283.01523:1 299.25745:49	32539	33477	32641
247	3.096	185.76	299.936	Unknown	[M-H]-		1	TRUE	null	null	null	null	null	null	4		FALSE	null	null	null	null	null	null	null	94.55	NEGIDA-1	299.93591:1911 300.93926:522 301.94262:2042	147.04138:12 147.04478:48 172.90259:24 261.96054:12	14690	13276	14357
248	14.729	883.74	300.415	Unknown	[M-H]-		1	FALSE	null	null	null	null	null	null	4		FALSE	null	null	null	null	null	null	null	83.41	NEGIDA-1	300.41428:3298 301.41763:247 302.42099:18		46681	47669	50318
249	9.725	583.5	301.181	w/o MS2:2-Methoxyestradiol	[M-H]-	found in higher mz's MsMs_296; found in higher mz's MsMs_335	1	TRUE	null	301.181	C19H26O3				3		FALSE	null	null	100	null	null	null	null	241.59	NEGIDA-3	301.18097:6451 302.18432:2529 303.18768:285	211.20648:10 273.17865:10 299.17993:12 301.18216:48	45894	40947	45386
250	13.768	826.08	301.217	w/o MS2:8-HETE	[M-H]-		1	TRUE	null	301.217	C20H32O3				2		FALSE	null	null	62.1	null	null	null	null	108.73	NEGIDA-1	301.21729:2012 302.22064:715 303.224:140	104.95837:5 186.97032:5 255.2356:18 283.12131:5 301.20871:6	20344	18593	19811
251	14.63	877.8	301.963	Unknown	[M-H]-	similar chromatogram in higher mz_441; similar chromatogram in higher mz_495	1	TRUE	null	null	null	null	null	null	4		FALSE	null	null	null	null	null	null	null	88.98	NEGIDA-1	301.96521:2484 302.96856:252 303.97192:64	198.98395:10 214.95488:24	29344	30968	31661
252	1.839	110.34	302.078	Unknown	[M-H]-		1	TRUE	null	null	null	null	null	null	4		FALSE	null	null	null	null	null	null	null	45.57	NEGIDA-1	302.07758:1254 303.08093:258 304.08429:51	114.00938:12 152.00452:12 172.01328:12 199.99619:10 242.04973:12 282.07227:12	9786	8752	9880
253	5.717	343.02	302.085	Unknown	[M-H]-		1	TRUE	null	null	null	null	null	null	4		FALSE	null	null	null	null	null	null	null	72.61	NEGIDA-1	302.08707:1958 303.09042:671 304.09378:56	135.93486:10 146.0466:24 146.04829:36 146.05:12 192.96631:10 201.91656:10	13579	13030	14211
254	5.384	323.04	303.078	w/o MS2:N-Acetylaspartylglutamic acid	[M-H]-		1	TRUE	null	303.083	C11H16N2O8	Dipeptides	OPVPGKGADVGKTG-UHFFFAOYNA-N	O=C(O)CCC(N=C(O)C(N=C(O)C)CC(=O)O)C(=O)O	3		FALSE	null	null	87.7	null	null	null	null	25.02	NEGIDA-1	303.07825:1385 304.0816:139 305.08496:44	76.97803:4 109.00534:50 240.90962:1	17774	16918	16204
255	1.075	64.5	304.033	Cytidine 2',3'-cyclic monophosphoric acid	[M-H]-		1	TRUE	null	304.034	C9H12N3O7P				2	2	FALSE	null	null	89	null	87.2	82.5	75	687.65	NEGIDA-1	304.0332:17348 305.03655:4657 306.03991:906	67.02909:48 96.97383:10 110.03583:610 148.05357:10 192.99962:12	164664	161992	161971
256	3.011	180.66	304.065	w/o MS2:Clofarabine	[M-H]-		1	TRUE	null	304.061	C10H11ClFN5O3	Purine 2'-deoxyribonucleosides	WDDPHFBMKLOVOX-UHFFFAOYNA-N	NC1=C2N=CN(C3OC(CO)C(O)C3F)C2=NC(Cl)=N1	3		FALSE	null	null	89.9	null	null	null	null	77.51	NEGIDA-1	304.06534:1977 305.06869:406 306.07205:50	106.03004:5 154.01677:6 172.02414:24 267.85446:5	14968	14207	14184
257	12.905	774.3	305.215	6.beta.-Hydroxytestosterone	[M-H]-		1	TRUE	null	305.211	C19H28O3				2		FALSE	null	null	81.2	null	70.3	75	100	201.24	NEGIDA-2	305.2157:4676 306.21905:1125 307.22241:478	79.95721:13 305.21176:51	47970	63760	66215
258	1.816	108.96	306.058	Unknown	[M-H]-		1	TRUE	null	null	null	null	null	null	4		FALSE	null	null	null	null	null	null	null	61	NEGIDA-1	306.05811:1214 307.06146:256 308.06482:236	61.98701:131	9158	8689	9003
259	4.235	254.1	309.069	w/o MS2:Sulfadimethoxine	[M-H]-		0.667	TRUE	null	309.066	C12H14N4O4S	Aminobenzenesulfonamides	ZZORFUFYDOWNEF-UHFFFAOYSA-N	COC=1C=C(N=C(N1)OC)NS(C2=CC=C(C=C2)N)(=O)=O	3		FALSE	null	null	97.1	null	null	null	null	16.83	NEGIDA-2	309.06873:1036 310.07208:199 311.07544:135	125.03535:48 183.01421:12 241.07973:12	6830	6736	6578
260	12.064	723.84	309.15	w/o MS2:Vincanidine	[M-H]-		0.667	TRUE	3.379	309.16	C19H20N2O2	Strychnos alkaloids	JDOFCMASVRMYJU-JYTRXFNOSA-N	C\C=C1\CN2CC[C@@]34[C@@H]2C[C@@H]1C(C=O)=C3NC1=C4C=CC=C1O	2		FALSE	null	null	61.1	99.6	null	null	null	40.3	NEGIDA-3	309.15039:1280 310.15374:257 311.1571:406	125.02299:10 156.985:12 226.30353:10 242.98708:12 309.15717:24	23566	21795	23940
261	12.442	746.52	309.173	C12-AE1S (TENTATIVE)	[M-H]-		1	TRUE	null	309.174	C14H30O5S	Sulfuric acid monoesters	QTDIEDOANJISNP-UHFFFAOYSA-N	CCCCCCCCCCCCOCCOS(O)(=O)=O	2		FALSE	null	null	84.3	null	78.9	86.5	50	176.28	NEGIDA-3	309.17343:7111 310.17678:2326 311.18014:22238	96.95861:20 148.9662:3 183.00279:4 183.01228:8 309.17883:73	57850	57499	57963
262	4.365	261.9	311.055	w/o MS2:Unknown (carbon number 17); PlaSMA ID-639	[M-H]-		0.667	FALSE	4.94	311.056	C17H12O6	NA			3		FALSE	null	null	99.6	100	null	null	null	23.7	NEGIDA-1	311.05475:1079 312.0581:365 313.06146:485		9327	8423	8260
263	12.499	749.94	311.168	w/o MS2:C11-LAS (STANDARD MIX)	[M-H]-	similar chromatogram in higher mz_370; similar chromatogram in higher mz_341; similar chromatogram in higher mz_353; similar chromatogram in higher mz_373; similar chromatogram in higher mz_403; similar chromatogram in higher mz_408; similar chromatogram in higher mz_419; similar chromatogram in higher mz_457; found in higher mz's MsMs_487; found in higher mz's MsMs_457; found in higher mz's MsMs…	1	TRUE	null	311.169	C17H28O3S	Benzenesulfonic acids and derivatives	FERBTPHUEYEGDN-UHFFFAOYNA-N	CCCCCCC(CCCC)C1=CC=C(C=C1)S(O)(=O)=O	2		FALSE	null	null	61.8	null	null	null	null	11758.2	NEGIDA-3	311.16833:178531 312.17168:47645 313.17504:16849	119.0444:12 119.05051:120 158.97658:10 170.00125:60 175.60011:10 183.01218:2550 184.02293:36 197.02415:36 198.03534:48 198.0531:12 225.04732:12 225.05994:36 226.071:12 239.08682:24 253.09798:36 310.20044:24 311.16949:3156	1807924	1762000	1763922
264	4.566	273.96	312.095	w/o MS2:Bromobutide	[M-H]-		1	TRUE	null	312.096	C15H22BrNO				3		FALSE	null	null	99.3	null	null	null	null	837.57	NEGIDA-2	312.09457:9224 313.09792:2282 314.10128:479	85.07161:6 99.28286:6 134.04489:743 232.0143:5 266.07669:12 266.09271:24	60533	63007	60781
265	5.471	328.26	312.923	Unknown	[M-H]-		1	TRUE	null	null	null	null	null	null	4		FALSE	null	null	null	null	null	null	null	38.42	NEGIDA-1	312.92227:2081 313.92562:335 314.92898:4669	114.98775:10 164.0347:36 179.05701:104	13244	13905	12591
266	12.091	725.46	313.076	w/o MS2:5-Hydroxyflunixin	[M-H]-		1	TRUE	null	313.079	C14H11F3N2O3				3		FALSE	null	null	93.5	null	null	null	null	40.81	NEGIDA-1	313.07584:2403 314.07919:1363 315.08255:939	59.97182:3 74.99141:15 91.01744:9 91.02012:20	16871	18775	18100
267	14.154	849.24	313.191	w/o MS2:Unknown (carbon number 19); PlaSMA ID-1659	[M-H]-		1	TRUE	3.73	313.191	C19H24N2O2	NA			3		FALSE	null	null	100	99.5	null	null	null	47.65	NEGIDA-2	313.19098:1558 314.19433:429 315.19769:885	185.02734:10 267.23575:12 313.16739:24	14941	15283	14479
268	1.525	91.5	313.933	Unknown	[M-H]-		1	TRUE	null	null	null	null	null	null	4		FALSE	null	null	null	null	null	null	null	44.31	NEGIDA-1	313.93295:1188 314.9363:222 315.93966:2659	144.95551:10 169.89709:12 277.93475:12	8539	7341	7603
269	9.757	585.42	314.197	w/o MS2:NCGC00385977-01_C16H24O5_4-Hydroxy-5-methoxy-4-[2-methyl-3-(3-methyl-2-buten-1-yl)-2-oxiranyl]-1-oxaspiro[2.5]octan-6-one	[M-H]-		1	TRUE	null	314.196	C16H24O5	Tertiary alcohols	NESRXFGQJARQNM-UHFFFAOYNA-N	COC1C(=O)CCC2(CO2)C1(O)C1(C)OC1CC=C(C)C	3		FALSE	null	null	99.9	null	null	null	null	274.46	NEGIDA-2	314.19672:2246 315.20007:549 316.20343:68	209.15146:10 238.1713:12 256.19412:12 256.19638:12 284.18051:24	16156	15799	14916
270	5.471	328.26	314.92	Unknown	[M-H]-		1	TRUE	null	null	null	null	null	null	4		FALSE	null	null	null	null	null	null	null	48.75	NEGIDA-1	314.92007:2590 315.92342:685 316.92678:3239	157.95963:10 179.04762:24 179.05513:150 314.9288:24	16224	15464	15932
271	1.533	91.98	315.929	Unknown	[M-H]-		1	TRUE	null	null	null	null	null	null	4		FALSE	null	null	null	null	null	null	null	67.26	NEGIDA-1	315.92899:1375 316.93234:511 317.9357:1912	100.89631:12 134.05936:12 180.06065:12 277.94177:12	9666	8665	8457
272	5.717	343.02	316.081	w/o MS2:Oxfendazole	[M-H]-		1	TRUE	null	316.075	C15H13N3O3S	Benzimidazoles	BEZZFPOZAYTVHN-UHFFFAOYNA-N	COC(=O)NC1=NC2=C(N1)C=C(C=C2)S(=O)C1=CC=CC=C1	3		FALSE	null	null	84.2	null	null	null	null	260.38	NEGIDA-1	316.0809:5067 317.08425:1347 318.08761:3854	80.96347:10 148.06537:10 185.90932:10 219.84726:10 231.91354:10	31844	29713	31266
273	4.957	297.42	316.152	w/o MS2:Oxycodone	[M-H]-		1	TRUE	null	316.154	C18H21NO4				3		FALSE	null	null	96.3	null	null	null	null	52.34	NEGIDA-3	316.15155:1450 317.1549:221 318.15826:0	113.0696:2 127.04941:6 128.03616:6 141.06982:5 195.07663:1 209.09439:5 316.15536:2	6380	6289	6945
274	14.63	877.8	316.442	Unknown	[M-H]-		1	TRUE	null	null	null	null	null	null	4		FALSE	null	null	null	null	null	null	null	303.17	NEGIDA-1	316.44006:2768 317.44341:187 318.44677:10	213.00531:10 302.97772:10	31847	30257	31978
275	14.437	866.22	316.947	Unknown	[M-H]-		0.333	FALSE	null	null	null	null	null	null	4		FALSE	null	null	null	null	null	null	null	50.56	NEGIDA-2	316.9473:2786 317.95065:300 318.95401:272		30601	31249	30659
276	0.956	57.36	316.98	Unknown	[M-H]-		1	FALSE	null	null	null	null	null	null	4		FALSE	null	null	null	null	null	null	null	38.21	NEGIDA-2	316.97964:2367 317.98299:618 318.98635:2655		13390	15896	14218
277	5.709	342.54	318.076	w/o MS2:NCGC00381449-01!3-(3-chloro-1,2-dihydroxypropyl)-8-hydroxy-6-methoxyisochromen-1-one	[M-H]-		1	TRUE	null	318.074	C13H13ClO6	Isocoumarins and derivatives	FJYFQXJJSFYJQV-UHFFFAOYNA-N	COC1=CC(O)=C2C(=O)OC(=CC2=C1)C(O)C(O)CCl	3		FALSE	null	null	97.3	null	null	null	null	87.63	NEGIDA-1	318.07623:1833 319.07958:508 320.08294:736	146.0466:12 148.05853:12	11523	10126	11154
278	13.154	789.24	319.23	12R-Hydroxy-5Z,8Z,10E,14Z-eicosatetraenoic acid	[M-H]-		1	TRUE	null	319.228	C20H32O3				2		FALSE	null	null	83.5	null	67.3	75	100	175.2	NEGIDA-2	319.22812:1258 320.23147:233 321.23483:173	75.73183:1 79.95843:5 319.22711:13	16094	14965	17567
279	1.564	93.84	321.048	Thymidine-5'-monophosphate; LC-ESI-QTOF; MS2; CE	[M-H]-		1	TRUE	null	321.049	C10H15N2O8P	Pyrimidine 2'-deoxyribonucleoside monophosphates	GYOZYWVXFNDGLU-XLPZGREQSA-N	CC1=CN([C@H]2C[C@H](O)[C@@H](COP(O)(O)=O)O2)C(=O)N=C1O	2	2	FALSE	null	null	97.2	null	95.3	98.6	100	463.15	NEGIDA-2	321.04688:15218 322.05022:2535 323.05358:586	78.71915:12 78.95824:374 88.98987:10 96.96688:48 125.03374:271 176.98935:12 176.99869:36 190.92424:10 195.00374:197 285.12601:10 321.05121:236	151743	149731	144332
280	12.418	745.08	321.173	w/o MS2:Zeranol	[M-H]-		1	TRUE	null	321.171	C18H26O5	Macrolides and analogues	DWTTZBARDOXEAM-UHFFFAOYNA-N	O=C1OC(C)CCCC(O)CCCCCC=2C=C(O)C=C(O)C12	3		FALSE	null	null	97.1	null	null	null	null	216.19	NEGIDA-3	321.17316:2635 322.17651:922 323.17987:1880	80.9637:33 146.96709:5 321.16251:5	16598	16102	17969
281	13.289	797.34	321.21	w/o MS2:Tryptamine	[M-H]-		1	TRUE	null	321.207	C10H12N2				3		FALSE	null	null	97.2	null	null	null	null	315.6	NEGIDA-1	321.20978:2733 322.21313:1056 323.21649:673	79.9568:2 81.95306:1 96.95685:9 321.21338:35	23371	20962	22022
282	14.621	877.26	322.97	Unknown	[M-H]-		1	TRUE	null	null	null	null	null	null	4		FALSE	null	null	null	null	null	null	null	32.95	NEGIDA-1	322.97:1848 323.97335:98 324.97671:225	142.94821:10 186.9245:12 201.96469:10 212.99786:12 214.97766:10	26511	27188	28371
283	1.005	60.3	323.028	Uridine 5'-monophosphate	[M-H]-		1	TRUE	null	323.029	C9H13N2O9P	Pyrimidine ribonucleoside monophosphates	DJJCXFVJDGTHFX-XVFCMESISA-N	O[C@@H]1[C@@H](COP(O)(O)=O)O[C@H]([C@@H]1O)N1C=CC(O)=NC1=O	2	2	FALSE	null	null	96.6	null	92.6	96.3	100	1201.08	NEGIDA-2	323.02805:45196 324.0314:6503 325.03476:1670	78.95953:459 96.9697:296 111.00896:12 111.02077:101 138.97855:24 161.0186:10 211.00473:48 323.00943:24 323.02707:87	440044	443030	439452
284	12.41	744.6	323.167	w/o MS2:Gelsemine	[M-H]-		1	TRUE	3.211	323.175	C20H22N2O2	Gelsemium alkaloids	NFYYATWFXNPTRM-ICFOCEFXSA-N	CN1C[C@@]2(C=C)C3C[C@H]4OC[C@@H]3[C@@H]1[C@@H]2[C@@]41C(O)=NC2=CC=CC=C12	2		FALSE	null	null	65	99.6	null	null	null	214.89	NEGIDA-3	323.16684:1559 324.17019:340 325.17355:887	176.98593:10 279.14774:10 323.1485:12 323.16614:48	24594	24859	25436
285	14.154	849.24	323.22	w/o MS2:NCGC00380425-01!1-(3,5-dihydroxyphenyl)-12-hydroxytridecan-2-one	[M-H]-	found in higher mz's MsMs_482; found in higher mz's MsMs_462; found in higher mz's MsMs_428; found in higher mz's MsMs_414; found in higher mz's MsMs_368; found in higher mz's MsMs_367	1	TRUE	null	323.222	C19H30O4	Long-chain fatty alcohols	LPIOEJKQFMDVFS-UHFFFAOYNA-N	CC(O)CCCCCCCCCC(=O)CC1=CC(O)=CC(O)=C1	3		FALSE	null	null	98.7	null	null	null	null	1342.88	NEGIDA-2	323.22006:10118 324.22341:2510 325.22677:438	233.14595:10 255.23383:115	90782	97571	90177
286	1.634	98.04	325.039	w/o MS2:Uridine 5'-monophosphate	[M-H]-		1	TRUE	null	325.043	C9H13N2O9P				3		FALSE	null	null	93.1	null	null	null	null	29.14	NEGIDA-1	325.03931:1133 326.04266:341 327.04602:36	151.02548:177	7673	6341	6549
287	12.799	767.94	325.184	Dodecylbenzenesulfonic acid	[M-H]-	found in higher mz's MsMs_463; found in higher mz's MsMs_431; found in higher mz's MsMs_392; found in higher mz's MsMs_371; found in higher mz's MsMs_358; similar chromatogram in higher mz_358; similar chromatogram in higher mz_371; similar chromatogram in higher mz_392; similar chromatogram in higher mz_431; similar chromatogram in higher mz_463; found in higher mz's MsMs_361	1	TRUE	null	325.184	C18H30O3S	Benzenesulfonic acids and derivatives	KWXICGTUELOLSQ-UHFFFAOYSA-N	CCCCCCCCCCCCC1=CC=C(C=C1)S(O)(=O)=O	2		FALSE	null	null	90.1	null	85.2	86.1	83.3	4075.22	NEGIDA-1	325.18411:118624 326.18746:43922 327.19082:15134	113.91637:10 119.04887:115 170.00291:48 183.01201:1554 184.01326:48 197.02003:12 198.03516:60 211.03899:12 225.0471:12 239.06493:12 239.06926:36 254.10056:12 325.16251:34 325.18527:4125	1302222	1356485	1401337
288	5.717	343.02	326.11	Unknown	[M-H]-		1	TRUE	null	null	null	null	null	null	4		FALSE	null	null	null	null	null	null	null	3374.38	NEGIDA-2	326.11075:48774 327.1141:14447 328.11746:3116	133.03859:503 146.05379:24 148.06407:3746 229.90024:10 280.09531:36	324885	325358	332232
289	1.893	113.58	326.111	Unknown	[M-H]-		1	TRUE	null	null	null	null	null	null	4		FALSE	null	null	null	null	null	null	null	247.22	NEGIDA-1	326.1106:3597 327.11395:1085 328.11731:171	107.03336:18 133.03516:6 148.06215:270 152.29002:6	27499	26635	26797
290	0.956	57.36	327.008	w/o MS2:Tris(1-chloro-2-propyl)phosphate	[M-H]-		1	TRUE	null	327.008	C9H18Cl3O4P	Trialkyl phosphates	KVMPUXDNESXNOH-UHFFFAOYNA-N	CC(CCl)OP(=O)(OC(C)CCl)OC(C)CCl	3		FALSE	null	null	100	null	null	null	null	157.73	NEGIDA-2	327.00784:6046 328.01119:1104 329.01455:585	78.95708:224 91.18635:24 96.96837:233 123.00193:12 132.03415:24 138.97864:48 154.01007:10 160.96353:191 174.98761:12 190.9729:60 199.00389:48 209.28891:10 220.98032:48 240.99716:12 241.01022:24 259.02078:160 281.00177:36	40824	42115	40429
291	4.364	261.84	327.032	w/o MS2:Thymidine 3',5'-cyclic monophosphate	[M-H]-		0.333	TRUE	null	327.035	C10H13N2O7P				3		FALSE	null	null	95.8	null	null	null	null	32.76	NEGIDA-2	327.03238:1184 328.03573:332 329.03909:237	178.01866:10 226.97418:10 243.06935:12 257.48978:10 265.01105:12 265.0567:36 270.31821:10 281.01984:12 307.0636:24 327.03152:24	10102	10156	9300
292	9.593	575.58	327.16	w/o MS2:Acepromazine; LC-ESI-QTOF; MS2; CE	[M-H]-	similar chromatogram in higher mz_331; similar chromatogram in higher mz_372	1	TRUE	null	327.153	C19H22N2OS	Phenothiazines	NOSIYYJFMPDDSA-UHFFFAOYSA-N	CN(C)CCCN1C2=CC=CC=C2SC2=C1C=C(C=C2)C(C)=O	2		FALSE	null	null	63.8	null	null	null	null	355.41	NEGIDA-2	327.16013:3712 328.16348:1696 329.16684:19459	107.05085:10 187.0761:10 241.11919:12 267.06372:10 297.10724:12 312.12823:12 327.14914:48 327.16437:48	25361	25037	25189
293	10.396	623.76	327.194	w/o MS2:Acitretin	[M-H]-	similar chromatogram in higher mz_369; similar chromatogram in higher mz_316; found in higher mz's MsMs_316; found in higher mz's MsMs_365; similar chromatogram in higher mz_395; found in higher mz's MsMs_395; found in higher mz's MsMs_492; found in higher mz's MsMs_404	0.667	FALSE	null	327.195	C21H26O3	Retinoids	IHUNBGSDBOWDMA-UHFFFAOYSA-N	COC1=CC(C)=C(C=CC(C)=CC=CC(C)=CC(O)=O)C(C)=C1C	3		FALSE	null	null	98.3	null	null	null	null	99.2	NEGIDA-3	327.1936:1029 328.19695:1314 329.20031:1002		6141	6270	6701
294	4.427	265.62	328.045	Adenosine 3',5'-cyclic monophosphate	[M-H]-	similar chromatogram in higher mz_490; found in higher mz's MsMs_490	1	TRUE	null	328.045	C10H12N5O6P				2	2	FALSE	null	null	96.3	null	93.2	93.6	100	3019.04	NEGIDA-1	328.04486:62929 329.04821:17427 330.05157:2713	78.9581:506 96.96396:12 107.0331:99 133.63242:12 134.04616:3592 134.98959:36 192.97972:12 192.98947:24 328.03152:69 328.04169:1466	429946	419440	416892
295	10.372	622.32	328.211	w/o MS2:Unknown (carbon number 17); PlaSMA ID-1770	[M-H]-		1	TRUE	4.29	328.212	C17H29NO5	NA			3		FALSE	null	null	99.3	99.8	null	null	null	355.13	NEGIDA-2	328.21103:1886 329.21438:653 330.21774:123	226.21474:10 252.19104:12 254.21518:24 298.18628:12 298.20566:48	13328	13381	13196
296	9.717	583.02	329.175	w/o MS2:NCGC00385255-01!4-[4-(1,3-benzodioxol-5-yl)-2,3-dimethylbutyl]-2-methoxyphenol	[M-H]-	found in higher mz's MsMs_348; found in higher mz's MsMs_335	1	TRUE	null	329.175	C20H24O4	Dibenzylbutane lignans	QDDILOVMGWUNGD-UHFFFAOYNA-N	COC1=C(O)C=CC(CC(C)C(C)CC2=CC3=C(OCO3)C=C2)=C1	3		FALSE	null	null	99.9	null	null	null	null	1940.51	NEGIDA-2	329.17514:34520 330.17849:14702 331.18185:79083	57.03417:36 123.08622:12 144.06583:10 186.97864:10 228.12831:12 231.14194:48 236.82045:10 242.98526:48 243.1405:36 257.14905:12 283.25684:24 287.14825:10 301.1684:24 301.18542:72 308.98749:24 329.17468:336	304028	227018	248061
297	10.93	655.8	330.122	w/o MS2:NCGC00380169-01!4-[(E)-3-(3,4-dihydroxyphenyl)prop-2-enoyl]oxy-2,3-dihydroxy-2-methylbutanoic acid	[M-H]-		1	TRUE	null	330.118	C14H16O8	Coumaric acids and derivatives	RUEPXZDDWQCITK-UHFFFAOYNA-N	CC(O)(C(O)COC(=O)C=CC1=CC(O)=C(O)C=C1)C(O)=O	3		FALSE	null	null	94.1	null	null	null	null	139.33	NEGIDA-1	330.12183:1614 331.12518:536 332.12854:65	116.0489:35 133.99104:2 330.12561:17	10063	9324	9031
298	9.717	583.02	331.19	w/o MS2:9,11-Dioxo-15S-hydroxy-5Z,13E-prostadienoic acid	[M-H]-	found in higher mz's MsMs_332; found in higher mz's MsMs_389; found in higher mz's MsMs_496; found in higher mz's MsMs_434	1	TRUE	null	331.192	C20H30O5				2		FALSE	null	null	67.4	null	null	null	null	3941.99	NEGIDA-3	331.18991:44204 332.19326:17374 333.19662:2784	125.05563:48 125.06033:76 173.05949:12 189.09723:36 282.12619:220 287.16614:12 297.15259:135 331.18408:48	297444	285495	294471
299	6.719	403.14	332.059	Unknown	[M-H]-		1	TRUE	null	null	null	null	null	null	4		FALSE	null	null	null	null	null	null	null	51.78	NEGIDA-1	332.05768:1126 333.06103:351 334.06439:985	161.97208:5 199.90495:6 239.90959:5 267.93738:6 274.04388:5 287.88934:6	6709	6893	6292
300	9.107	546.42	333.125	w/o MS2:Unknown (carbon number 20); PlaSMA ID-1818	[M-H]-		1	TRUE	6.28	333.124	C20H16N2O3	NA			3		FALSE	null	null	99.5	100	null	null	null	175.29	NEGIDA-3	333.12509:5128 334.12844:1691 335.1318:538	93.0721:1 109.04195:1 122.09499:2 136.07547:4 139.06104:1 148.07556:4 149.06877:2 151.02034:1 162.95329:2 164.09213:2 173.06866:2 182.06656:4 188.95834:1 196.08418:2 196.93547:2 201.09427:2 221.007:1 244.13551:2 246.13373:4 249.0312:2 253.05992:1 255.15025:8 282.9111:1 287.14227:5 289.1373:4 299.1358:4 333.13168:54	27788	31338	30329
301	12.067	724.02	333.135	Unknown	[M-H]-		1	TRUE	null	null	null	null	null	null	4		FALSE	null	null	null	null	null	null	null	46.94	NEGIDA-3	333.13248:1286 334.13583:358 335.13919:174	96.96011:23 111.0046:2 112.98602:12 128.97408:5 265.14877:88	10020	10876	9988
302	10.675	640.5	336.193	w/o MS2:Leucine Enkephalin	[M-H]-		1	TRUE	null	336.192	C28H37N5O7				3		FALSE	null	null	98.9	null	null	null	null	204.19	NEGIDA-1	336.19327:1481 337.19662:468 338.19998:1021	55.6622:5 174.41826:5 199.93259:5 225.8665:5 257.92911:5 278.05392:5 316.12216:5 319.13409:5 324.95801:5 335.90732:5	9967	9445	9958
303	14.677	880.62	336.858	Unknown	[M-H]-		0.333	FALSE	null	null	null	null	null	null	4		FALSE	null	null	null	null	null	null	null	20.35	NEGIDA-3	336.85782:1008 337.86117:75 338.86453:387		7585	7071	8107
304	12.636	758.16	337.15	w/o MS2:Cys-Ser-Lys	[M-H]-		1	TRUE	null	337.154	C12H24N4O5S				2		FALSE	null	null	72.9	null	null	null	null	274.84	NEGIDA-3	337.15042:2580 338.15377:1221 339.15713:796	87.00717:3 88.98847:8 96.93642:4 104.98705:3 128.97382:4 132.97835:36 146.97174:3 178.94626:3 184.93723:3 200.92926:4 215.0143:3 298.97821:3 337.16788:16 337.18848:24	18479	16151	19071
305	10.372	622.32	337.184	w/o MS2:NCGC00380098-01!(2R,3R,4S,5S,6R)-2-[3-(2-hydroxyethyl)-4-(hydroxymethyl)hex-5-enoxy]-6-(hydroxymethyl)oxane-3,4,5-triol	[M-H]-		1	TRUE	null	337.186	C15H28O8	Fatty acyl glycosides of mono- and disaccharides	LXZLWLTYJBHIOS-UHFFFAOYNA-N	OCCC(CCOC1OC(CO)C(O)C(O)C1O)C(CO)C=C	3		FALSE	null	null	98.2	null	null	null	null	74.93	NEGIDA-1	337.18378:1373 338.18713:371 339.19049:89	154.92487:10 166.91394:10 170.99919:10 194.94479:10 198.97974:10 200.96896:10 206.9274:10 248.94264:10 269.0769:10 274.94742:10	8661	8187	8310
306	13.049	782.94	337.202	w/o MS2:9S,11,15S-Trihydroxythromboxa-5Z,13E,17Z-trien-1-oic acid	[M-H]-	similar chromatogram in higher mz_493; similar chromatogram in higher mz_500	1	TRUE	null	337.2	C20H32O6				3		FALSE	null	null	97.5	null	null	null	null	439.89	NEGIDA-1	337.20224:3616 338.20559:1203 339.20895:106987	80.96606:10 96.95309:12 96.95999:69 132.98009:24 281.04385:10 337.20685:125	24254	24307	21547
307	14.63	877.8	337.445	Unknown	[M-H]-		1	TRUE	null	null	null	null	null	null	4		FALSE	null	null	null	null	null	null	null	379.68	NEGIDA-1	337.44672:4523 338.45007:243 339.45343:180	127.00965:10 227.00417:12 260.86569:12 282.96805:10 326.96616:10	59023	58385	56033
308	13.066	783.96	339.198	w/o MS2:Pseudocopsinine	[M-H]-	found in higher mz's MsMs_467; found in higher mz's MsMs_439; found in higher mz's MsMs_388; found in higher mz's MsMs_376	1	TRUE	4.238	339.207	C21H26N2O2	Aspidospermatan-type alkaloids	CZLWGXKWXLVFJU-UHFFFAOYNA-N	COC(=O)C1CC23CCCN4CCC5(C24)C2=CC=CC=C2NC15C3C	2		FALSE	null	null	69.6	99.6	null	null	null	7889.37	NEGIDA-1	339.19849:75736 340.20184:24625 341.2052:8223	119.04443:12 119.05054:144 156.99875:36 164.94493:10 170.00313:71 183.01413:2006 184.01918:24 197.0183:24 197.03603:36 211.0372:12 225.07053:36 239.07607:48 260.06433:10 275.23843:24 338.13452:12 339.20306:3297	701215	724798	695179
309	14.145	848.7	340.21	w/o MS2:Methylergonovine; LC-ESI-QTOF; MS2; CE	[M-H]-		1	TRUE	null	340.202	C20H25N3O2	Lysergamides	UNBRKDKAWYKMIV-UHFFFAOYNA-N	CCC(CO)N=C(O)C1CN(C)C2CC3=CNC4=CC=CC(=C34)C2=C1	2		FALSE	null	null	63.2	null	null	null	null	302.37	NEGIDA-1	340.20877:1573 341.21212:603 342.21548:126	61.98804:36 224.99042:10 340.14108:12 340.20575:36	20926	22812	20661
310	1.067	64.02	341.108	Sucrose	[M-H]-	found in higher mz's MsMs_362; found in higher mz's MsMs_350; found in higher mz's MsMs_438	1	TRUE	null	341.109	C12H22O11	O-glycosyl compounds	CZMRCDWAGMRECN-UHFFFAOYNA-N	OCC1OC(OC2(OC(CO)C(O)C2O)CO)C(O)C(O)C1O	2	2	FALSE	null	null	89.7	null	94.5	85.9	57.1	960.09	NEGIDA-2	341.10715:43157 342.1105:10100 343.11386:2362	57.03405:10 59.01358:264 71.01245:123 83.01196:12 85.03413:12 89.02175:171 101.02188:48 113.02479:48 119.03543:60 149.04857:12 179.04796:12 341.1073:97	355920	342548	360747
311	6.719	403.14	342.087	w/o MS2:Fenamifos sulfoxide	[M-H]-		1	TRUE	null	342.09	C13H22NO4PS				3		FALSE	null	null	96.6	null	null	null	null	867.28	NEGIDA-2	342.08728:14343 343.09063:4399 344.09399:2075	92.02116:4 107.02747:4 107.03472:46 128.98825:3 134.04799:2155 295.16153:4 296.08026:69	84999	90225	86812
312	11.766	705.96	342.262	w/o MS2:ACar 12:1; [M]+	[M-H]-		0.667	TRUE	1.71	342.264	C19H36NO4	ACar	PETYOUXDCHQKTQ-ZHACJKMWNA-O	CCCCCC\C=C\CCCC(=O)OC(CC(O)=O)C[N+](C)(C)C	3		FALSE	null	null	97.9	99.5	null	null	null	100.73	NEGIDA-2	342.26184:1044 343.26519:470 344.26855:4853	199.17047:48	7324	7353	7578
313	10.396	623.76	343.191	w/o MS2:(-)-11-Nor-9-carboxy-.DELTA.9-THC	[M-H]-		1	TRUE	null	343.192	C21H28O4				3		FALSE	null	null	100	null	null	null	null	44.07	NEGIDA-2	343.19119:1224 344.19454:904 345.1979:58261	61.99047:10 137.05768:12 162.95564:10 189.0824:12 258.93991:10 271.17081:12 281.15735:10 285.18594:12 309.14749:12 325.18146:10 343.17267:12	6690	7660	7273
314	11.765	705.9	344.278	w/o MS2:Lauroyl L-carnitine	[M-H]-		1	TRUE	null	344.28	C19H37NO4				3		FALSE	null	null	99.1	null	null	null	null	390.87	NEGIDA-2	344.27817:2680 345.28152:1226 346.28488:159	199.17043:83	17190	19006	18414
315	0.98	58.8	345.01	Unknown	[M-H]-		1	TRUE	null	null	null	null	null	null	4		FALSE	null	null	null	null	null	null	null	82.62	NEGIDA-1	345.01025:3988 346.0136:1015 347.01696:401	71.01566:10 78.95424:12 87.00695:12 129.97409:10 138.97472:12 150.97517:12 160.95393:12 175.09448:10 190.96822:12 208.91689:12 229.97556:12 258.02072:10 285.01855:10 301.99207:12	29574	28740	27021
316	10.396	623.76	345.208	w/o MS2:Cortodoxone	[M-H]-	found in higher mz's MsMs_369; found in higher mz's MsMs_492; found in higher mz's MsMs_395; found in higher mz's MsMs_365	1	TRUE	null	345.207	C21H30O4	21-hydroxysteroids	WHBHBVVOGNECLV-UHFFFAOYNA-N	O=C1C=C2CCC3C(CCC4(C)C3CCC4(O)C(=O)CO)C2(C)CC1	3		FALSE	null	null	99.8	null	null	null	null	3142.29	NEGIDA-2	345.20767:31334 346.21102:14243 347.21438:2164	58.00622:12 69.03496:12 73.0286:128 123.07816:153 174.07231:36 189.08597:12 189.09369:131 223.14969:12 241.16266:380 267.18283:24 283.16412:36 296.13852:24 301.18716:24 309.17911:24 327.19467:129 330.17975:10 345.21729:60	187727	196213	194387
317	1.525	91.5	346.054	AMP; LC-ESI-QTOF; MS2; CE	[M-H]-		1	TRUE	null	346.056	C10H14N5O7P	Purine ribonucleoside monophosphates	UDMBCSSLTHHNCD-KQYNXXCUSA-N	NC1=C2N=CN([C@@H]3O[C@H](COP(O)(O)=O)[C@@H](O)[C@H]3O)C2=NC=N1	2	2	FALSE	null	null	95.9	null	90.5	96.6	100	1020.31	NEGIDA-3	346.05478:21243 347.05813:3784 348.06149:566	78.95837:558 96.96842:181 134.03198:12 134.04822:86 210.98665:12 210.99684:36 284.07129:10 346.05188:345	268182	260160	261137
318	5.717	343.02	348.09	w/o MS2:N-Glycolylneuraminic acid	[M-H]-		1	TRUE	null	348.09	C11H19NO10				3		FALSE	null	null	99.9	null	null	null	null	59.01	NEGIDA-3	348.08963:1114 349.09298:426 350.09634:148	133.04327:24 148.05536:12 148.06049:219 216.05035:24	7129	7300	7464
319	0.955	57.3	348.991	Unknown	[M-H]-		0.333	FALSE	null	null	null	null	null	null	4		FALSE	null	null	null	null	null	null	null	38.56	NEGIDA-2	348.99051:1049 349.99386:324 350.99722:202		6224	7046	6575
320	14.298	857.88	349.234	w/o MS2:DL-Arginine	[M-H]-		1	TRUE	null	349.231	C6H14N4O2				3		FALSE	null	null	95	null	null	null	null	264.97	NEGIDA-3	349.2338:2137 350.23715:772 351.24051:737	108.99505:10 281.23392:12 281.25037:60 301.22055:10 303.23691:36	23012	22523	23195
321	4.435	266.1	350.025	Unknown	[M-H]-		1	TRUE	null	null	null	null	null	null	4		FALSE	null	null	null	null	null	null	null	79.01	NEGIDA-1	350.02502:1375 351.02837:360 352.03173:39	126.28181:10 134.04939:112 288.05063:10	9625	9764	8733
322	3.011	180.66	350.07	Unknown	[M-H]-		1	TRUE	null	null	null	null	null	null	4		FALSE	null	null	null	null	null	null	null	72.81	NEGIDA-1	350.07034:1277 351.07369:471 352.07705:137	99.01181:10 133.00914:48 150.04478:169 154.00639:10 190.01643:12 274.05072:10 282.08627:85 350.05447:12	9177	8637	8979
323	12.056	723.36	350.126	w/o MS2:Azasetron	[M-H]-		0.667	TRUE	null	350.127	C17H20ClN3O3	Benzoxazinones	WUKZPHOXUVCQOR-UHFFFAOYNA-N	O=C1N(C=2C=C(Cl)C=C(C(O)=NC3CN4CCC3CC4)C2OC1)C	3		FALSE	null	null	99.6	null	null	null	null	43.69	NEGIDA-2	350.12567:1102 351.12902:283 352.13238:150	96.95302:6 96.95992:30 126.89735:6 126.90683:30 168.94044:5 230.98752:5 261.98114:5 265.146:112 304.15607:5 313.95142:6 349.87064:30 350.11728:12	9151	8466	7493
324	13.452	807.12	351.25	w/o MS2:Unknown (carbon number 21); PlaSMA ID-1929	[M-H]-	found in higher mz's MsMs_470; found in higher mz's MsMs_448; found in higher mz's MsMs_398	1	TRUE	7.5	351.248	C21H34O4	NA			3		FALSE	null	null	98.8	99.8	null	null	null	362.17	NEGIDA-1	351.24963:5158 352.25298:1454 353.25634:283	264.96353:10 283.263:152 351.24426:24	86856	74432	88010
325	1.823	109.38	351.968	Unknown	[M-H]-		1	TRUE	null	null	null	null	null	null	4		FALSE	null	null	null	null	null	null	null	107.32	NEGIDA-1	351.96942:2289 352.97277:881 353.97613:5200	88.03702:36 112.91557:12 119.9472:10 146.08197:24 156.90181:36 163.97517:12 185.92818:127 207.96344:60 234.00671:10 277.995:12 278.00668:12 280.01904:65 315.99197:36	16935	15545	17285
326	12.612	756.72	353.2	w/o MS2:13,14-Dihydro-16,16-difluoro Prostaglandin E1	[M-H]-		1	TRUE	null	353.2	C20H34F2O5				3		FALSE	null	null	100	null	null	null	null	457.67	NEGIDA-2	353.20007:3586 354.20342:1497 355.20678:793	69.03142:1 79.95464:4 96.95865:53 99.92807:1 104.96275:5 112.93971:27 122.97231:5 130.97581:2 132.97366:2 148.94742:6 148.95769:5 170.97194:2 201.0309:2 269.20844:1 285.24457:4 352.08597:2 353.15521:5 353.19739:204	28806	27406	29325
327	1.823	109.38	353.965	Unknown	[M-H]-		1	TRUE	null	null	null	null	null	null	4		FALSE	null	null	null	null	null	null	null	136.11	NEGIDA-1	353.96661:2738 354.96996:1044 355.97332:3829	88.04097:36 114.9184:10 146.08197:48 151.935:10 158.89676:77 163.96979:24 185.92244:12 185.94156:12 187.92619:158 207.94727:12 207.9594:108 209.95226:48 218.08914:12 265.8266:10 280.01199:60 282.01273:60 315.97952:12 316.00693:24 317.98959:36 353.95337:12	20377	20020	20595
328	12.151	729.06	355.11	w/o MS2:Unknown (carbon number 20); PlaSMA ID-1969	[M-H]-		1	TRUE	3.39	355.111	C20H18O6	NA			3		FALSE	null	null	99.2	99.6	null	null	null	104.84	NEGIDA-1	355.11014:1989 356.11349:670 357.11685:1081	172.97261:24 183.00435:12 183.01004:48 297.15225:126 354.99387:12	18710	15809	18336
329	14.162	849.72	355.156	w/o MS2:6',7'-Dihydroxybergamottin	[M-H]-		1	TRUE	null	355.154	C21H24O6				2		FALSE	null	null	66.1	null	null	null	null	380.48	NEGIDA-2	355.15628:2468 356.15963:1210 357.16299:487	99.9268:24 114.98502:12 131.9408:10 256.24084:10 293.15118:12 311.13553:12 355.15894:36	29335	27881	26377
330	0.909	54.54	356.987	Unknown	[M-H]-		1	TRUE	null	null	null	null	null	null	4		FALSE	null	null	null	null	null	null	null	26.75	NEGIDA-2	356.98633:1060 357.98968:275 358.99304:399	79.95843:24 96.96144:189 222.86061:10 350.91861:10	6654	6892	7193
331	9.593	575.58	359.185	Cortisone	[M-H]-		1	TRUE	null	359.186	C21H28O5				2	2	FALSE	null	null	94.1	null	94.7	94.6	76	342.67	NEGIDA-3	359.18527:4941 360.18862:2070 361.19198:462	95.05261:5 109.06546:30 122.03619:12 123.07645:18 125.05882:12 135.07944:18 136.05431:30 137.05731:151 149.05519:12 163.07698:18 179.10963:12 257.13693:6 257.1459:24 259.13788:18 271.11008:6 271.13086:24 297.0415:5 299.16757:12 301.18195:60 311.16464:87 314.86423:5 326.14743:12 328.1489:12 329.17609:281 341.16898:12	30549	29468	31061
332	9.725	583.5	361.202	CORTISOL	[M-H]-		1	TRUE	null	361.202	C21H30O5	21-hydroxysteroids	JYGXADMDTFJGBT-UHFFFAOYNA-N	CC12CC(O)C3C(CCC4=CC(=O)CCC34C)C1CCC2(O)C(=O)CO	2	2	FALSE	null	null	84.4	null	92.4	70	48.1	1283.01	NEGIDA-2	361.2001:12220 362.20345:5328 363.20681:3259	91.05393:10 107.04515:12 107.05096:81 121.06702:24 123.08144:92 125.06071:577 135.04556:60 137.06259:24 145.06566:24 159.04071:12 159.04425:24 161.05807:24 173.05264:12 174.06331:48 177.87343:10 189.08817:249 231.12253:12 241.12161:12 241.12596:24 264.13153:24 269.15604:24 279.11981:12 279.13153:48 282.10822:35 282.12704:1648 287.17175:24 296.2186:24 297.15106:1802 301.18756:48 305.32483:10 313.1…	86468	78486	83594
333	1.075	64.5	362.05	Guanosine 5'-monophosphate; LC-ESI-QTOF; MS2; CE	[M-H]-		1	TRUE	null	362.051	C10H14N5O8P	Purine ribonucleoside monophosphates	RQFCJASXJCIDSX-UUOKFMHZSA-N	O[C@@H]1[C@@H](COP(O)(O)=O)O[C@H]([C@@H]1O)N1C=NC2=C1NC(=N)N=C2O	2	2	FALSE	null	null	96.8	null	91.3	99	100	354.03	NEGIDA-1	362.05017:7363 363.05352:1241 364.05688:288	78.95064:12 78.95811:491 81.16417:10 96.97226:48 133.01706:36 141.02103:10 150.04117:24 210.97987:12 211.00024:107 269.94479:10 319.05356:24 362.04968:197	112901	111809	113274
334	14.437	866.22	362.94	Unknown	[M-H]-		1	FALSE	null	null	null	null	null	null	4		FALSE	null	null	null	null	null	null	null	51.54	NEGIDA-2	362.93967:2688 363.94302:638 364.94638:630		28721	48909	37984
335	9.725	583.5	363.181	w/o MS2:Met-Gly-Arg	[M-H]-		1	TRUE	null	363.181	C13H26N6O4S				2		FALSE	null	null	64.9	null	null	null	null	689.06	NEGIDA-2	363.18051:6292 364.18386:2630 365.18722:448	57.03411:60 139.06316:12 231.13106:60 243.12279:12 243.14465:84 255.13766:10 282.12:24 284.13058:48 284.14951:12 286.15781:24 299.14893:48 301.18027:258 305.89856:10 317.17871:24 319.18759:24 326.87811:10 329.17438:667 333.2019:60 363.18344:215	42954	41359	40912
336	12.151	729.06	365.141	w/o MS2:MGDG 6:0; [M-H]-; MGDG(2:0/4:0)	[M-H]-		1	TRUE	null	365.145					3		FALSE	null	null	92.1	null	null	null	null	643.3	NEGIDA-1	365.14072:5007 366.14407:1294 367.14743:486	170.00285:10 183.00435:60 183.01195:156 226.06227:10 228.94766:24 297.15466:826	44692	39649	41226
337	1.005	60.3	366.106	w/o MS2:NCGC00380808-01!(6aS)-1,2,11-trimethoxy-5,6,6a,7-tetrahydro-4H-dibenzo[de,g]quinoline-10-ol	[M-H]-		0.667	FALSE	null	366.11	C19H21NO4	Aporphines	MULATNABYLUECQ-UHFFFAOYNA-N	COC1=C(OC)C2=C3C(CC4=C2C(OC)=C(O)C=C4)NCCC3=C1	3		FALSE	null	null	91.3	null	null	null	null	87.31	NEGIDA-1	366.10596:1147 367.10931:10920 368.11267:1688		7636	6708	7176
338	14.737	884.22	366.401	Unknown	[M-H]-		1	TRUE	null	null	null	null	null	null	4		FALSE	null	null	null	null	null	null	null	79.68	NEGIDA-1	366.40112:2558 367.40447:164 368.40783:23	126.98731:10 164.07767:10 175.83977:10 200.94502:12 223.9229:10 228.89893:60 247.78438:10 255.83386:12 270.90656:36 271.90005:24 283.80807:10 290.77542:10 301.76599:12 302.79742:60 322.93573:10 342.80771:24 342.83627:87	35969	35244	37409
339	1.005	60.3	367.105	w/o MS2:5-O-Caffeoylquinic acid methyl ester	[M-H]-		1	TRUE	null	367.103	C17H20O9	Quinic acids and derivatives	MZNIJRAPCCELQX-UHFFFAOYNA-N	COC(=O)C1(O)CC(O)C(O)C(C1)OC(=O)C=CC1=CC(O)=C(O)C=C1	2		FALSE	null	null	65.7	null	null	null	null	247.31	NEGIDA-1	367.10486:4585 368.10821:1641 369.11157:470	71.01565:36 85.01303:36 95.01949:12 113.02425:60 115.02052:84 125.02391:36 127.025:48 137.00926:12 145.02258:12 145.03102:36 157.02988:89 169.03296:36 187.04451:77 199.0406:10 205.05092:60 217.04623:12 247.06693:48 275.03052:12 277.06943:94 307.06305:12 307.08026:36 367.10748:371	30614	28397	29588
340	14.352	861.12	367.286	w/o MS2:FAHFA 22:1; FAHFA 17:1/5:0; [M-H]-	[M-H]-		1	TRUE	3.83	367.285	C22H40O4	FAHFA	BDBTWRWJPCYNQR-KHPPLWFENA-N	CCCCCCC\C=C/CCCCCCCC(=O)OC(CC)CC(O)=O	2		FALSE	null	null	63.7	99.4	null	null	null	201.61	NEGIDA-2	367.28586:1348 368.28921:377 369.29257:287	162.96246:5 267.2652:40 283.26071:5 323.28424:5 323.29684:25 367.28625:20 367.36151:37	9311	10943	9778
341	12.499	749.94	369.126	w/o MS2:Tricresylphosphate	[M-H]-		1	TRUE	null	369.125	C21H21O4P	Aryl phosphotriesters	YSMRWXYRXBRSND-UHFFFAOYSA-N	CC1=CC=CC=C1OP(=O)(OC2=CC=CC=C2C)OC3=CC=CC=C3C	3		FALSE	null	null	99.3	null	null	null	null	656.23	NEGIDA-3	369.12625:4661 370.1296:1146 371.13296:2810	94.92695:5 132.97856:6 154.98451:5 164.9559:6 176.97273:5 207.10538:5 225.04971:6 239.07413:12 251.97279:5 265.03452:5 299.23822:5 309.17908:6 311.16989:85 323.00201:6	46235	50688	48224
342	14.162	849.72	369.213	w/o MS2:Methoxyfenozide; LC-ESI-ITFT; MS2; CE	[M-H]-	found in higher mz's MsMs_414; found in higher mz's MsMs_454; found in higher mz's MsMs_477	1	TRUE	null	369.217	C22H28N2O3	Benzoic acids and derivatives	QCAWEPFNJXQPAN-UHFFFAOYSA-N	COC1=CC=CC(C(O)=NN(C(=O)C2=CC(C)=CC(C)=C2)C(C)(C)C)=C1C	3		FALSE	null	null	92.4	null	null	null	null	270.99	NEGIDA-2	369.21329:1995 370.21664:857 371.22:550	91.02987:10 148.9529:10 253.2081:10 255.23183:60 279.22064:36 281.23737:60 295.12863:10 301.20712:12 323.35303:12 325.21945:60 351.2872:10 369.21945:36	20900	21653	21701
343	13.818	829.08	369.301	w/o MS2:FAHFA 22:0; FAHFA 2:0/20:0; [M-H]-	[M-H]-		1	TRUE	4.06	369.301	C22H42O4	FAHFA	UKPIBIYWTOEACW-UHFFFAOYNA-N	CCCCCCCCCCCC(CCCCCCCC(O)=O)OC(C)=O	3		FALSE	null	null	100	99.5	null	null	null	198.5	NEGIDA-3	369.30121:1683 370.30456:493 371.30792:89	55.01954:5 97.01523:2 99.01044:24 183.01796:5 255.22891:5 269.79776:2 281.24603:5 301.22095:22 311.16965:5 325.22366:7 369.20773:5 369.3317:5	27965	22532	25264
344	12.499	749.94	371.123	w/o MS2:2',3',5'-Triacetyl-5-azacytidine	[M-H]-		1	TRUE	null	371.12	C14H18N4O8				3		FALSE	null	null	95.2	null	null	null	null	90.83	NEGIDA-3	371.12283:1832 372.12618:454 373.12954:169	112.98284:10 166.98473:10 183.01218:79 207.13538:10 302.94418:10 311.14722:24 311.16702:169 313.17416:48 353.23401:10	16431	17853	18713
345	7.266	435.96	373.115	w/o MS2:NCGC00347404-02_C15H20O8_4-Acetyl-3-hydroxy-5-methylphenyl beta-D-glucopyranoside	[M-H]-		0.667	TRUE	null	373.114	C15H20O8	Phenolic glycosides	CFJLERBDXYGARW-UHFFFAOYNA-N	CC(=O)C1=C(O)C=C(OC2OC(CO)C(O)C(O)C2O)C=C1C	3		FALSE	null	null	99.7	null	null	null	null	36.65	NEGIDA-3	373.11478:1110 374.11813:266 375.12149:224	140.99817:1 182.92152:2 188.93571:2 198.06932:6 212.07593:2 212.08409:5 228.9718:2 240.06422:4 241.07573:36 243.09421:5 255.08598:13 258.92166:2 261.01788:1 265.07355:4 283.08411:10 310.87091:2 354.92114:2 373.3457:13	6704	6904	7214
346	11.256	675.36	374.243	w/o MS2:Asn-Ile-Lys	[M-H]-	found in higher mz's MsMs_399	1	TRUE	null	374.24	C16H31N5O5				3		FALSE	null	null	94.8	null	null	null	null	93.21	NEGIDA-3	374.24307:1470 375.24642:650 376.24978:108	143.10785:3 184.87691:3 218.02812:3 226.00853:8 273.92395:3 341.97101:4 374.21112:4 374.24368:122	9586	8673	9676
347	7.098	425.88	375.13	(-)-Riboflavin; LC-ESI-QTOF; MS2; CE	[M-H]-	found in higher mz's MsMs_393	1	TRUE	null	375.131	C17H20N4O6	Flavins	AUNGANRZJHBGPY-SCRDCRAPSA-N	CC1=CC2=C(C=C1C)N(C[C@H](O)[C@H](O)[C@H](O)CO)C1=NC(=O)N=C(O)C1=N2	2	2	FALSE	null	null	91	null	89.5	87.3	80	1016.43	NEGIDA-2	375.12943:19698 376.13278:7090 377.13614:1205	96.66465:10 212.07957:60 241.07088:36 255.08994:500 375.12473:12	136870	131608	132938
348	9.717	583.02	375.178	w/o MS2:NCGC00179907-02!3-(2,5-dihydroxy-6-methyl-3-propan-2-ylphenyl)-2-methyl-5-propan-2-ylbenzene-1,4-diol	[M-H]-		1	TRUE	null	375.181	C20H26O4	Biphenols	QYNCIWOOLDANTG-UHFFFAOYSA-N	CC(C)C1=CC(O)=C(C)C(=C1O)C1=C(O)C(=CC(O)=C1C)C(C)C	3		FALSE	null	null	99.7	null	null	null	null	83.48	NEGIDA-2	375.18213:2331 376.18548:1159 377.18884:383	232.93649:10 248.90834:12 307.06265:10 329.17212:12	15073	15649	16302
349	4.365	261.9	376.948	Unknown	[M-H]-		1	TRUE	null	null	null	null	null	null	4		FALSE	null	null	null	null	null	null	null	81.44	NEGIDA-2	376.94846:2243 377.95181:506 378.95517:5419	166.07603:24 200.08116:48 243.07376:36 269.06073:24 296.96381:12 296.97348:60 313.05722:24 318.90332:10 322.9509:24 340.94839:12 340.96396:321	18324	16286	13955
350	1.075	64.5	377.083	w/o MS2:Chlorogenic acid	[M-H]-		1	TRUE	null	377.084	C16H18O9				3		FALSE	null	null	98.7	null	null	null	null	182.21	NEGIDA-1	377.08264:4992 378.08599:1461 379.08935:3640	89.02546:24 161.04141:12 179.03995:12 179.05496:24 313.08447:10 341.10635:48 377.07986:48	36840	32939	35622
351	4.364	261.84	378.941	Unknown	[M-H]-		0.333	TRUE	null	null	null	null	null	null	4		FALSE	null	null	null	null	null	null	null	25.31	NEGIDA-2	378.94147:2649 379.94482:1206 380.94818:4057	68.9975:10 183.87817:10 200.07121:36 243.07809:36 292.96774:12 292.97977:36 296.97586:24 298.96829:24 324.92731:12 340.97165:95 342.96088:60 342.96866:274 378.99411:24	20968	19790	16969
352	1.075	64.5	379.084	w/o MS2:Justicidin G; PlaSMA ID-2097	[M-H]-		1	TRUE	8.93	379.081	C21H14O7	Arylnaphthalene lignans	VINGQMQXGDIELG-UHFFFAOYSA-N	COC1=C2OCOC2=CC2=C(C3=C(C=C12)C(=O)OC3)C1=CC2=C(OCO2)C=C1	3		FALSE	null	null	95.6	99.7	null	null	null	101.73	NEGIDA-1	379.08423:1721 380.08758:500 381.09094:161	116.98159:10 195.043:10 208.9805:12 225.54642:10 242.98016:24 278.89435:10 292.96112:12 292.97311:36 317.15311:10 357.84891:12 358.98001:24 361.70084:10 378.98666:36	12784	11053	12254
353	12.499	749.94	379.155	w/o MS2:Gly-Gly-Gly	[M-H]-	found in higher mz's MsMs_457	1	TRUE	null	379.157	C6H11N3O4				3		FALSE	null	null	97.3	null	null	null	null	1039.44	NEGIDA-3	379.15488:12697 380.15823:3779 381.16159:1626	71.00286:10 114.98927:10 134.9751:10 158.97482:36 183.01028:249 226.96175:12 292.98007:48 311.16949:1955 358.97971:24	134551	132110	133542
354	5.471	328.26	381.102	w/o MS2:Lactacystin	[M-H]-		1	TRUE	null	381.1	C15H24N2O7S				3		FALSE	null	null	98.7	null	null	null	null	435.23	NEGIDA-1	381.10165:8516 382.105:2829 383.10836:457	110.89958:10 122.03468:77 158.95721:10 164.03481:257 168.78383:10 179.05901:1542	49698	52182	52335
355	10.396	623.76	381.182	w/o MS2:NCGC00160309-01!12-(3-(3,4-Dimethoxyphenyl)acryloyl)-cytisine	[M-H]-		1	TRUE	null	381.181	C22H24N2O4	Cytisine and derivatives	PEJWBGPIVLSQLL-UHFFFAOYNA-N	COC1=C(OC)C=C(C=CC(=O)N2CC3CC(C2)C2=CC=CC(=O)N2C3)C=C1	3		FALSE	null	null	98.9	null	null	null	null	2274.79	NEGIDA-3	381.18237:27624 382.18572:14502 383.18908:22245	224.91141:10 250.94814:12 278.95135:10 312.9346:12 331.02203:10 335.20718:12 362.99402:24	169944	170010	172508
356	12.151	729.06	382.129	w/o MS2:NCGC00160329-01!4-Hydroxy-3-(4-methoxy-6-methyl-5,6,7,8-tetrahydro-[1,3]dioxolo[4,5-g]isoquinolin-5-yl)-chromen-2-one	[M-H]-		1	TRUE	null	382.129	C21H19NO6	4-hydroxycoumarins	VJLLAJFALOGHNM-UHFFFAOYNA-N	COC1=C2C(N(C)CCC2=CC2=C1OCO2)C1=C(O)C2=CC=CC=C2OC1=O	3		FALSE	null	null	100	null	null	null	null	223.03	NEGIDA-1	382.1286:2184 383.13195:706 384.13531:182	183.00626:36 297.1329:12 297.14984:378 298.15399:24	20152	15990	19166
357	3.977	238.62	383.113	S-Adenosyl-homocysteine	[M-H]-		1	TRUE	null	383.114	C14H20N6O5S	5'-deoxy-5'-thionucleosides	ZJUKTBDSGOFHSH-UHFFFAOYNA-N	O=C(O)C(N)CCSCC1OC(N2C=NC=3C(=NC=NC32)N)C(O)C1O	2	2	FALSE	null	null	91.9	null	85.3	86.4	100	1853.75	NEGIDA-1	383.11328:38862 384.11663:14642 385.11999:5897	57.03278:2 70.02641:5 71.01454:54 74.99014:82 86.99134:111 88.02253:5 92.02229:12 98.99068:2 101.006:10 105.00126:12 107.03593:157 110.05906:7 110.98795:5 112.04095:5 114.00011:7 116.01701:38 124.04586:7 126.05331:5 128.9991:44 131.01718:12 132.05144:10 134.04607:6417 134.67032:5 135.0873:5 136.64357:5 142.04704:5 144.04817:10 147.01064:32 148.04634:5 154.05133:19 176.04053:99 188.03767:129 232.9…	243001	224623	230874
358	12.799	767.94	383.142	w/o MS2:C17H22N2O8; PlaSMA ID-2114	[M-H]-		1	TRUE	2.07	383.146	C17H22N2O8	NA			3		FALSE	null	null	93.6	99.4	null	null	null	469.58	NEGIDA-3	383.14206:3541 384.14541:1150 385.14877:2072	132.98186:24 183.00113:24 183.0201:48 202.97856:24 325.18362:431 383.15393:36	35476	36829	38872
359	10.396	623.76	383.181	w/o MS2:NCGC00386089-01_C21H28O5_	[M-H]-		1	TRUE	null	383.183	C21H28O5	Naphthopyrans	UHNRJNAOOCIDDJ-UHFFFAOYNA-N	CC1CC(=O)C2=C(O1)OC1(C)CCC3C(C)(C)C4OC4C(=O)C3(C)C1C2	3		FALSE	null	null	98.3	null	null	null	null	471.43	NEGIDA-3	383.18106:9698 384.18441:4889 385.18777:835	104.95439:10 130.95526:12 208.99117:10 238.88382:12 249.4019:10 264.00174:10 306.87576:12 364.90158:10 383.17648:12	58120	57284	60345
360	14.162	849.72	384.161	w/o MS2:Meropenem	[M-H]-		1	FALSE	null	384.159	C17H25N3O5S				3		FALSE	null	null	96.9	null	null	null	null	172.1	NEGIDA-2	384.16132:1133 385.16467:438 386.16803:130		14201	14964	13884
361	12.799	767.94	385.137	w/o MS2:Phenaceturic acid	[M-H]-		1	TRUE	null	385.14	C10H11NO3				3		FALSE	null	null	95.1	null	null	null	null	175.47	NEGIDA-2	385.13733:1344 386.14068:386 387.14404:227	102.95939:10 112.98297:36 122.95678:10 158.98207:10 168.99171:89 183.01237:24 198.03752:10 239.07841:10 325.16568:12 325.18338:178 327.18442:48 385.1438:36	12778	13854	13525
362	1.067	64.02	387.113	w/o MS2:Sulfinpyrazone	[M-H]-		1	TRUE	null	387.116	C23H20N2O3S				3		FALSE	null	null	95.5	null	null	null	null	1023.9	NEGIDA-1	387.11319:25322 388.11654:6626 389.1199:1866	59.0134:1390 71.00869:12 71.01342:635 85.02871:48 87.00972:36 89.02413:1443 97.03304:36 101.02582:451 101.71773:10 107.03166:36 113.02596:562 119.02438:24 119.03355:1161 131.03014:96 135.11185:10 143.03339:208 149.043:172 161.04675:302 179.05684:976 262.76239:12 340.02448:12 340.04517:36 341.10635:3597	199203	190222	194039
363	11.765	705.9	388.268	Unknown	[M-H]-		1	TRUE	null	null	null	null	null	null	4		FALSE	null	null	null	null	null	null	null	882.75	NEGIDA-1	388.26944:6370 389.27279:3174 390.27615:481	128.07063:10 144.10384:125 198.55257:99 199.16962:5331	45072	46495	46329
364	14.143	848.58	389.099	w/o MS2:NCGC00384685-01_C21H18O6_7-Oxabicyclo[4.1.0]hept-4-ene-2,3-diol, 1-[(benzoyloxy)methyl]-, 3-benzoate	[M-H]-		0.333	TRUE	null	389.1	C21H18O6	Benzoic acid esters	BHNSEWKVMCNSGO-UHFFFAOYNA-N	OC1C(OC(=O)C2=CC=CC=C2)C=CC2OC12COC(=O)C1=CC=CC=C1	3		FALSE	null	null	99.7	null	null	null	null	57.58	NEGIDA-3	389.09875:1023 390.1021:341 391.10546:1944	249.03539:10 255.23289:60 345.11206:12 389.09708:48	10545	11116	13125
365	10.396	623.76	389.197	w/o MS2:16-Phenoxy tetranor prostaglandin F2.alpha.	[M-H]-		1	TRUE	null	389.197	C22H30O6				3		FALSE	null	null	99.9	null	null	null	null	217.82	NEGIDA-3	389.19745:2258 390.2008:1189 391.20416:350609	58.00632:24 73.02634:12 105.07224:10 123.08305:157 135.07658:12 174.07079:48 184.93982:12 189.09212:36 241.16093:759 267.16269:12 273.19089:10 285.19791:24 294.16574:12 296.14392:36 297.19714:12 309.17722:12 309.1871:36 311.17795:36 327.17502:12 327.19785:336 343.1806:12 343.20139:36 345.20493:618 355.41843:10	13789	13956	14310
366	0.98	58.8	391.015	Unknown	[M-H]-		1	FALSE	null	null	null	null	null	null	4		FALSE	null	null	null	null	null	null	null	52.4	NEGIDA-1	391.01489:1430 392.01824:390 393.0216:319		10352	9959	9591
367	14.152	849.12	391.097	w/o MS2:NCGC00168971-02_C17H20O9_(1R,3R,4S,5R)-1,3,4-Trihydroxy-5-{[(2E)-3-(4-hydroxy-3-methoxyphenyl)-2-propenoyl]oxy}cyclohexanecarboxylic acid	[M-H]-	found in higher mz's MsMs_368	0.667	TRUE	null	391.1	C17H20O9	Quinic acids and derivatives	RAGZUCNPTLULOL-UHFFFAOYNA-N	COC1=C(O)C=CC(C=CC(=O)OC2CC(O)(CC(O)C2O)C(O)=O)=C1	3		FALSE	null	null	96.5	null	null	null	null	51.39	NEGIDA-2	391.09729:1263 392.10064:528 393.104:1292	104.95293:10 112.98618:132 255.23183:669 323.21939:116 347.15146:24 355.21213:10 391.09604:91	14784	14777	15578
368	14.154	849.24	391.205	w/o MS2:1-Hexadecanoyl-2-(9Z-octadecenoyl)-sn-glycero-3-phospho-(1'-rac-glycerol)	[M-H]-		1	TRUE	null	391.2	C40H77O10P				2		FALSE	null	null	60.2	null	null	null	null	200.98	NEGIDA-2	391.20547:3351 392.20882:1017 393.21218:177	106.95368:10 112.98608:70 255.23831:243 314.97931:10 323.21658:96 347.15115:24 391.0929:117	31644	34692	33415
369	10.396	623.76	391.211	w/o MS2:11-Dehydrothromboxane B2	[M-H]-		1	TRUE	null	391.209	C20H32O6				2		FALSE	null	null	75.3	null	null	null	null	17891.6	NEGIDA-2	391.2113:173912 392.21465:82444 393.21801:13996	241.1543:12 241.15865:24 313.17505:12 327.1825:12 327.19516:24 329.20236:24 345.19434:12 345.2178:60 391.14032:12 391.21246:339	1061911	1075737	1076916
370	12.499	749.94	391.282	Deoxycholic acid; LC-ESI-QTOF; MS2; CE	[M-H]-		1	TRUE	null	391.285	C24H40O4	Dihydroxy bile acids, alcohols and derivatives	KXGVEGMKQFWNSR-LLQZFEROSA-N	C[C@H](CCC(O)=O)[C@H]1CC[C@H]2[C@@H]3CC[C@@H]4C[C@H](O)CC[C@]4(C)[C@H]3C[C@H](O)[C@]12C	2		FALSE	null	null	89.4	null	76.8	87.4	100	250.6	NEGIDA-1	391.285:2198 392.28835:1134 393.29171:269	223.0338:2 239.12547:2 255.23734:5 277.18417:5 304.8262:2 311.17395:10 319.22375:2 323.17249:16 327.26727:7 329.27979:5 343.26465:13 345.27878:19 347.2962:10 350.90714:2 391.28561:264	19576	22070	22008
371	12.799	767.94	393.171	w/o MS2:Sparfloxacin	[M-H]-	found in higher mz's MsMs_463	1	TRUE	null	393.173	C19H22F2N4O3	Quinoline carboxylic acids	DZZWHBIBMUVIIW-UHFFFAOYNA-N	CC1CN(CC(C)N1)C1=C(F)C2=C(C(N)=C1F)C(=O)C(=CN2C1CC1)C(O)=O	3		FALSE	null	null	98.3	null	null	null	null	728.93	NEGIDA-2	393.17142:11816 394.17477:3860 395.17813:1396	172.99699:12 183.0029:24 183.01617:259 261.21704:12 266.98563:24 325.18591:2233	117002	127678	118544
372	9.593	575.58	395.163	w/o MS2:NCGC00380255-01_C21H27ClO5_6H-2-Benzopyran-6-one, 8-(acetyloxy)-5-chloro-3-[(1E,3E,5S)-3,5-dimethyl-1,3-heptadien-1-yl]-1,7,8,8a-tetrahydro-7-hydroxy-7-methyl-, (7R,8R,8aR)-	[M-H]-		1	TRUE	null	395.162	C21H27ClO5	Cyclohexenones	MMOJJYPBNVVCGY-UHFFFAOYNA-N	CCC(C)C=C(C)C=CC1=CC2=C(Cl)C(=O)C(C)(O)C(OC(C)=O)C2CO1	3		FALSE	null	null	99.5	null	null	null	null	752.88	NEGIDA-3	395.16296:7998 396.16631:3597 397.16967:5434	137.05731:6 147.00244:5 188.94307:5 214.90546:6 234.93491:5 249.03139:6 268.90231:6 290.91211:5 300.8559:12 301.1868:18 311.15723:6 318.92374:12 329.15317:6 329.17609:59 350.89993:6 393.93188:5 395.1604:74	51169	47109	51506
373	12.499	749.94	396.144	w/o MS2:NCGC00160257-01!3-(6,7-Dimethoxy-isoquinolin-1-yl)-3-(3,4-dimethoxy-phenyl)-acrylic acid	[M-H]-		1	TRUE	null	396.144	C22H21NO6	Benzylisoquinolines	LZVIVIHUEWKDLV-UHFFFAOYSA-N	COC1=CC2=C(C=C1OC)C(=NC=C2)C(=CC(O)=O)C1=CC(OC)=C(OC)C=C1	3		FALSE	null	null	99.9	null	null	null	null	964.56	NEGIDA-3	396.14374:6006 397.14709:1763 398.15045:594	61.98918:60 183.00838:60 311.16702:847 312.17474:79 352.24097:10 396.1283:36 396.15063:60	53764	60796	59887
374	11.64	698.4	396.242	w/o MS2:NCGC00380973-01_C21H30O6_	[M-H]-		0.667	FALSE	null	396.238	C21H30O6	Naphthopyrans	BKISVXZMCJBOKR-UHFFFAOYNA-N	CCC1CC2C(C)=CC3CCCCC3C2(C)C2(O1)OC(=O)C(C)(O)OC2=O	3		FALSE	null	null	90.8	null	null	null	null	195.02	NEGIDA-3	396.24246:1167 397.24581:340 398.24917:166		8137	7675	8196
375	5.471	328.26	397.077	w/o MS2:D-p-Chlorophenylalanine	[M-H]-		1	TRUE	null	397.073	C9H10ClNO2				3		FALSE	null	null	92.9	null	null	null	null	17.8	NEGIDA-1	397.07654:1303 398.07989:429 399.08325:404	122.03622:24 152.07367:10 164.03481:48 179.04587:36 179.05713:766 378.98108:10	7539	6966	7392
376	13.066	783.96	397.155	w/o MS2:Sebacic acid bis(N-succinimidyl) ester	[M-H]-		1	TRUE	null	397.16	C18H24N2O8				3		FALSE	null	null	86.4	null	null	null	null	192.84	NEGIDA-1	397.15509:2250 398.15844:797 399.1618:1327	139.07608:10 164.9612:10 183.0123:36 338.12949:12 339.20316:408 353.25269:10 397.15366:24	19965	20646	20531
377	9.717	583.02	397.177	w/o MS2:Tetrahydroalstonine; PlaSMA ID-999	[M-H]-	found in higher mz's MsMs_498	1	TRUE	4.86	397.177	C21H24N2O3	Yohimbine alkaloids	GRTOGORTSDXSFK-UHFFFAOYNA-N	COC(=O)C1=COC(C)C2CN3CCC4=C(NC5=C4C=CC=C5)C3CC12	3		FALSE	null	null	100	99.9	null	null	null	5045.38	NEGIDA-3	397.17712:78328 398.18047:34291 399.18383:53530	146.93625:10 248.86339:24 288.93027:10 331.17938:12 331.18701:80 360.80527:10 397.17896:910	520558	480736	513626
378	12.726	763.56	397.226	w/o MS2:Triethylene glycol dodecyl ether sulfate	[M-H]-		1	TRUE	null	397.227	C18H38O7S				3		FALSE	null	null	99.5	null	null	null	null	191.63	NEGIDA-3	397.22559:2170 398.22894:843 399.2323:332	79.9585:7 89.03104:2 96.95876:26 122.97713:10 124.94772:5 155.04927:2 174.95619:7 192.96869:5 292.09796:2 303.21341:2 311.17511:5 312.17047:7 397.22974:326	15171	16942	17762
379	13.456	807.36	397.243	w/o MS2:Unknown (carbon number 25); PlaSMA ID-2177	[M-H]-	found in higher mz's MsMs_436	0.667	TRUE	8.76	397.237	C25H32O4	NA			3		FALSE	null	null	84.4	99.9	null	null	null	97.17	NEGIDA-3	397.24332:1202 398.24667:592 399.25003:298	102.98605:10 214.97066:10 271.01465:10 283.27158:24 305.22766:12 305.23746:24 309.26419:48 339.18143:12 339.19952:24 353.24103:36 353.24631:60 397.23627:89 397.25302:36	18654	18153	20368
380	1.723	103.38	399.105	w/o MS2:Unknown (carbon number 21); PlaSMA ID-2183	[M-H]-		0.333	TRUE	5.23	399.107	C21H18O8	NA			3		FALSE	null	null	98.5	99.9	null	null	null	73.42	NEGIDA-2	399.10535:1119 400.1087:261 401.11206:60	68.99754:1 70.02769:18 102.98484:2 107.03609:2 108.04253:2 114.98471:7 132.01134:2 134.04626:113 138.87422:1 150.01892:2 150.02579:5 152.04065:2 186.01828:2 198.97778:1 204.03447:14 262.9035:1 296.9035:1 318.8158:2 360.79938:1 380.87238:2 399.10925:13	6623	7705	7409
381	9.717	583.02	399.175	w/o MS2:NCGC00347677-02_C18H26N2O8_1,5-Dideoxy-3-C-({[2-(gamma-glutamylamino)benzyl]oxy}carbonyl)-L-arabinitol	[M-H]-		1	TRUE	null	399.176	C18H26N2O8	Glutamine and derivatives	NFINSJKQOBJWEB-UHFFFAOYNA-N	CC(O)C(O)(C(C)O)C(=O)OCC1=CC=CC=C1N=C(O)CCC(N)C(O)=O	3		FALSE	null	null	99.6	null	null	null	null	1718.09	NEGIDA-3	399.17523:27936 400.17858:11894 401.18194:2443	284.20065:10 331.18918:24 361.22321:10 397.9223:24 399.18225:390	182844	167125	182447
382	7.862	471.72	401.079	w/o MS2:Carbenicillin	[M-H]-		1	TRUE	null	401.078	C17H18N2O6S				3		FALSE	null	null	99.6	null	null	null	null	60.69	NEGIDA-1	401.0787:1912 402.08205:537 403.08541:65	208.96684:1 294.85895:2 303.15274:1 306.86105:2 312.09653:4 313.0983:173 316.90424:2 332.89755:2 338.80902:2 356.86624:2 357.09146:34 382.77307:2 401.07175:7	17964	17358	16870
383	11.984	719.04	401.199	w/o MS2:17-Trifluoromethylphenyl trinor prostaglandin F2.alpha.	[M-H]-		1	TRUE	null	401.2	C24H31F3O5				3		FALSE	null	null	98.9	null	null	null	null	1215.85	NEGIDA-3	401.19855:12307 402.2019:5918 403.20526:2133	61.98711:4 79.956:159 80.96241:6 92.93304:2 100.93032:1 104.98589:1 106.9798:86 107.98888:10 112.98309:10 128.96779:5 133.06604:16 138.00002:34 151.00868:249 164.93805:2 166.94342:2 167.00322:28 174.96178:2 180.9749:2 190.9847:2 195.03349:37 196.9557:4 205.16246:145 219.18701:2 220.97008:2 223.50198:2 234.85583:2 235.46664:2 247.90663:2 248.93893:2 249.02747:4 264.89093:2 264.94571:4 283.80664:2 …	80177	79614	81629
384	0.932	55.92	402.995	Uridine 5'-diphosphate	[M-H]-		1	TRUE	null	402.995	C9H14N2O12P2				2		FALSE	null	null	84.7	null	83.6	86.3	53.8	37.11	NEGIDA-1	402.99167:1531 403.99502:249 404.99838:127	78.95934:48 111.01756:12 158.92509:70 222.86423:12 242.96434:10 290.95709:12 305.00998:12 330.90555:10 384.98599:24 402.9989:48	11525	12028	11322
385	1.075	64.5	404.103	w/o MS2:L-Cyhalothrin	[M-H]-		1	TRUE	null	404.1	C23H19ClF3NO3				3		FALSE	null	null	96.5	null	null	null	null	424.11	NEGIDA-1	404.10266:4799 405.10601:1345 406.10937:454	61.98813:526 196.01965:10 256.9527:10	35728	32619	35741
386	3.977	238.62	405.096	w/o MS2:17-Trifluoromethylphenyl-13,14-dihydro trinor prostaglandin F2.alpha.	[M-H]-		1	TRUE	null	405.1	C24H33F3O5				3		FALSE	null	null	91.9	null	null	null	null	43.12	NEGIDA-3	405.09589:1534 406.09924:579 407.1026:266	74.98911:7 86.99156:5 107.03621:10 113.02318:5 134.04803:188 156.01102:12 174.06294:2 198.01772:7 226.01422:7 238.02991:2 264.89737:2 270.05127:5 287.85605:2 304.04385:5 336.85928:2 405.10281:40	9475	8525	9574
387	9.593	575.58	405.189	w/o MS2:NCGC00380826-01![1-(3,4-dihydroxy-5-methoxyphenyl)-7-(3,4-dihydroxyphenyl)heptan-3-yl] acetate	[M-H]-		1	TRUE	null	405.191	C22H28O7	Linear diarylheptanoids	ISMTYWQWKQRTNM-UHFFFAOYNA-N	COC1=CC(CCC(CCCCC2=CC(O)=C(O)C=C2)OC(C)=O)=CC(O)=C1O	3		FALSE	null	null	98.7	null	null	null	null	2081.79	NEGIDA-2	405.18915:17454 406.1925:8225 407.19586:1622	102.96089:10 107.0552:48 109.06564:280 122.03484:36 123.04398:48 123.08287:150 125.06373:178 135.04379:12 135.08617:60 136.05452:128 137.06245:825 149.06398:118 161.08817:12 179.10803:36 203.10448:60 243.14659:24 255.13965:24 257.15756:197 259.13828:60 271.1405:149 283.17603:36 284.13739:24 290.97714:10 299.15347:24 299.17047:60 301.1824:1437 311.16263:782 326.13525:12 326.15045:151 328.15955:36 …	114295	107695	113114
388	13.066	783.96	407.184	w/o MS2:C25H28O5; PlaSMA ID-1035	[M-H]-	found in higher mz's MsMs_467	1	TRUE	9.45	407.185	C25H28O5	NA			3		FALSE	null	null	99.9	99.9	null	null	null	1015.9	NEGIDA-1	407.18417:8061 408.18752:2481 409.19088:1111	119.0429:24 134.97676:12 150.94635:10 176.98187:10 183.01224:191 338.14484:24 339.20306:2007	70885	72435	74777
389	9.717	583.02	407.206	w/o MS2:Thr-Met-Arg	[M-H]-	found in higher mz's MsMs_409	1	TRUE	null	407.207	C15H30N6O5S				2		FALSE	null	null	61.7	null	null	null	null	40738.8	NEGIDA-3	407.20648:308261 408.20983:139226 409.21319:24991	59.9839:48 76.98552:12 76.98798:60 91.05376:10 95.04858:36 107.0435:12 107.05075:140 109.06993:36 119.04451:12 121.06988:12 123.07654:148 125.06204:2560 135.04367:48 135.08604:84 137.06233:199 156.47388:10 159.04749:48 161.05777:48 161.09514:73 173.06155:48 174.07224:74 175.07658:60 188.6445:24 189.08974:2618 198.13423:24 209.09612:24 211.10458:24 213.77016:24 224.51556:10 227.10568:60 229.13284:…	2013151	1892391	1995267
390	11.617	697.02	407.278	Cholic acid; LC-ESI-QTOF; MS2; CE	[M-H]-	found in higher mz's MsMs_424; similar chromatogram in higher mz_424	1	TRUE	null	407.28	C24H40O5	Trihydroxy bile acids, alcohols and derivatives	BHQCQFFYRZLCQQ-OELDTZBJSA-N	C[C@H](CCC(O)=O)[C@H]1CC[C@H]2[C@@H]3[C@H](O)C[C@@H]4C[C@H](O)CC[C@]4(C)[C@H]3C[C@H](O)[C@]12C	2		FALSE	null	null	89	null	87.6	82.7	72.7	500.74	NEGIDA-2	407.28006:3720 408.28341:1594 409.28677:285	144.95387:3 193.08727:3 251.1985:8 287.20203:3 289.21631:16 325.26672:4 327.26801:8 338.94492:3 343.26544:45 345.27435:16 347.03827:3 353.24213:8 375.17926:3 407.27643:528	21935	25419	25378
391	10.396	623.76	408.202	w/o MS2:16-Phenoxy tetranor prostaglandin F2.alpha. cyclopropyl methyl amide	[M-H]-		1	TRUE	null	408.2	C26H37NO5				3		FALSE	null	null	98.3	null	null	null	null	1084.21	NEGIDA-3	408.20187:7061 409.20522:3671 410.20858:871	61.9883:3404 123.07842:12 189.09024:12 240.14497:12 242.16393:87 300.22473:10 328.19318:89 328.20081:192 344.18433:12 346.21161:304	42863	42695	45265
392	12.799	767.94	410.158	w/o MS2:FLU_410.1574_18.4	[M-H]-		1	TRUE	null	410.157	C21H22F3NO4	Trifluoromethylbenzenes	SAIPSZMZTANCFE-UHFFFAOYNA-N	CN(CCC(C1=CC=CC=C1)OC2=CC=C(C=C2)C(F)(F)F)C(CCC(=O)O)=O	3		FALSE	null	null	99.5	null	null	null	null	585.95	NEGIDA-2	410.15839:4369 411.16174:1671 412.1651:516	171.00867:10 183.01428:74 325.18591:857 326.1882:48 350.11774:10 410.15732:36	36987	45278	44504
393	7.098	425.88	411.107	w/o MS2:Nicosulfuron	[M-H]-		1	TRUE	null	411.108	C15H18N6O6S				3		FALSE	null	null	99.7	null	null	null	null	110.67	NEGIDA-3	411.10727:2853 412.11062:1101 413.11398:1850	122.96129:10 192.99358:10 212.08156:48 230.87033:12 241.07951:36 255.09435:393 375.13007:36	17915	17855	18635
394	0.98	58.8	412.995	w/o MS2:Naringenin-4'-O-.beta.-D-Glucuronide	[M-H]-		1	FALSE	null	413	C21H20O11				3		FALSE	null	null	87.4	null	null	null	null	44.25	NEGIDA-2	412.99481:1492 413.99816:461 415.00152:257		9572	10206	9533
395	10.396	623.76	413.192	w/o MS2:20-Trifluoroleukotriene B4	[M-H]-		1	TRUE	null	413.191	C20H29F3O4				2		FALSE	null	null	60.1	null	null	null	null	133.14	NEGIDA-2	413.19244:1537 414.19579:915 415.19915:194	69.03845:10 126.9987:10 160.31116:10 189.08597:12 210.95392:10 224.89618:10 230.95168:12 241.16048:103 262.9313:10 300.90488:12 327.18454:12 327.19724:36 339.15176:10 345.20425:48 355.1904:10 373.19366:12 393.21448:10 395.18314:24 413.19373:36	9191	9514	9535
396	0.94	56.4	414.04	Unknown	[M-H]-	similar chromatogram in higher mz_483	1	TRUE	null	null	null	null	null	null	4		FALSE	null	null	null	null	null	null	null	73.07	NEGIDA-3	414.03934:1270 415.04269:375 416.04605:147	78.96455:24 96.97113:48 115.00298:12 132.02931:142 138.9902:24 160.96353:24 207.11752:10 222.99889:10 259.02304:60	9710	9071	8869
397	11.451	687.06	418.97	Unknown	[M-H]-	found in higher mz's MsMs_433	1	TRUE	null	null	null	null	null	null	4		FALSE	null	null	null	null	null	null	null	65.55	NEGIDA-1	418.97122:2261 419.97457:407 420.97793:18	61.98827:2 72.99397:1 87.00879:1 112.98917:4 118.9897:2 130.98415:4 146.97398:4 152.90538:1 168.99025:18 170.96135:4 174.9601:2 177.03651:1 181.00526:1 186.93251:2 196.96181:2 198.92513:2 202.9389:2 208.93234:2 214.93694:2 214.95338:4 218.9921:10 224.93025:2 228.92747:2 236.88724:2 238.89464:4 238.96185:2 246.91197:2 248.91263:2 250.93248:2 264.87979:2 266.91516:2 266.97702:2 268.98593:4 282.8838…	13160	14092	14830
398	13.452	807.12	419.239	w/o MS2:Pro-Phe-Arg	[M-H]-		1	TRUE	null	419.24	C20H30N6O4				3		FALSE	null	null	99	null	null	null	null	254.06	NEGIDA-3	419.23871:2110 420.24206:556 421.24542:242	102.9519:10 112.98703:60 145.78366:10 283.2692:296 331.26245:24 351.24844:215 419.12878:129	37315	31971	34227
399	11.256	675.36	420.247	w/o MS2:CerP 20:1; [M-H]-; CerP(d18:1(4E)/2:0)	[M-H]-		1	TRUE	null	420.252					3		FALSE	null	null	89.5	null	null	null	null	137.77	NEGIDA-3	420.24683:1105 421.25018:496 422.25354:91	225.12175:3 374.24368:512	7040	7082	7246
400	7.098	425.88	421.134	w/o MS2:NCGC00380493-01_C17H24O12_4H-Pyran-4-one, 2-methyl-3-[[6-O-[(2R,3R,4R)-tetrahydro-3,4-dihydroxy-4-(hydroxymethyl)-2-furanyl]-beta-D-glucopyranosyl]oxy]-	[M-H]-		1	TRUE	null	421.134	C17H24O12	O-glycosyl compounds	OXNYNKGAOAFFBD-UHFFFAOYNA-N	CC1=C(OC2OC(COC3OCC(O)(CO)C3O)C(O)C(O)C2O)C(=O)C=CO1	3		FALSE	null	null	100	null	null	null	null	245.44	NEGIDA-2	421.13416:9285 422.13751:2949 423.14087:678	59.01348:36 130.06242:10 144.07877:24 169.07361:48 184.07625:12 184.08575:94 185.06894:36 190.90677:10 198.06694:36 211.42445:48 212.08365:1489 224.07637:12 240.06807:196 241.07523:244 254.29535:48 255.08994:10680 255.84537:24 257.10089:48 375.13016:655	60469	61656	57527
401	12.758	765.48	421.224	w/o MS2:Met(O)-Val-Arg	[M-H]-		1	TRUE	null	421.223	C16H32N6O5S				3		FALSE	null	null	99.6	null	null	null	null	489.5	NEGIDA-2	421.22366:4400 422.22701:2190 423.23037:814	61.9881:4 80.96478:133 112.98734:8 132.97357:8 132.98328:8 148.93877:4 151.03424:3 172.98209:3 200.9751:8 285.1236:8 325.18311:272 327.17398:12 327.19937:8 332.96298:3 341.22336:3 355.39618:3 389.14474:3 421.22855:97	35374	37570	36860
402	9.593	575.58	422.18	w/o MS2:Pitavastatin	[M-H]-		1	TRUE	null	422.176	C25H24FNO4	Phenylquinolines	VGYFMXBACGZSIL-UHFFFAOYNA-N	O=C(O)CC(O)CC(O)C=CC=1C(=NC=2C=CC=CC2C1C=3C=CC(F)=CC3)C4CC4	3		FALSE	null	null	91.9	null	null	null	null	729.99	NEGIDA-2	422.18033:5013 423.18368:2626 424.18704:540	61.9882:968	32231	30762	32528
403	12.499	749.94	423.18	w/o MS2:NCGC00169656-02!2-(2,4-dihydroxyphenyl)-5,7-dihydroxy-3,8-bis(3-methylbut-2-enyl)chromen-4-one	[M-H]-		1	TRUE	null	423.18	C25H26O6	8-prenylated flavones	UWQYBLOHTQWSQD-UHFFFAOYSA-N	CC(C)=CCC1=C2OC(=C(CC=C(C)C)C(=O)C2=C(O)C=C1O)C1=C(O)C=C(O)C=C1	3		FALSE	null	null	100	null	null	null	null	131.12	NEGIDA-2	423.18018:1254 424.18353:540 425.18689:220	218.93124:12 218.94992:24 311.16708:324 313.16925:24 423.18814:24	11767	13146	12377
404	10.396	623.76	423.185	w/o MS2:Met(O)-Glu-Lys	[M-H]-		1	TRUE	null	423.191	C16H30N4O7S				2		FALSE	null	null	73.1	null	null	null	null	191.65	NEGIDA-1	423.18509:1453 424.18844:781 425.1918:1290	76.96448:12 76.97186:36 94.9787:48 327.19656:48 345.19315:12 387.16879:12 405.15311:24 405.17569:77 423.18781:367	9415	9085	9257
405	13.074	784.44	424.173	w/o MS2:FR122047	[M-H]-		1	TRUE	null	424.169	C23H25N3O3S				3		FALSE	null	null	91	null	null	null	null	258.76	NEGIDA-1	424.17325:2298 425.1766:856 426.17996:351	128.04224:10 183.00844:24 205.64044:10 337.79675:10 339.20306:411 340.19824:36 424.10907:12 424.18994:36	18742	20833	22034
406	9.717	583.02	424.196	w/o MS2:NCGC00169210-02_C21H26O8_2-Propenoic acid, 2-methyl-, (3aS,4S,5R,6R,8Z,10R,11aR)-5-(acetyloxy)-2,3,3a,4,5,6,7,10,11,11a-decahydro-6-hydroxy-6,10-dimethyl-3-methylene-2,7-dioxocyclodeca[b]furan-4-yl ester	[M-H]-		1	TRUE	null	424.197	C21H26O8	Germacranolides and derivatives	COWWBPRRBQOULA-UHFFFAOYNA-N	CC1CC2OC(=O)C(=C)C2C(OC(=O)C(C)=C)C(OC(C)=O)C(C)(O)C(=O)C=C1	3		FALSE	null	null	99.9	null	null	null	null	7169.21	NEGIDA-3	424.19614:42672 425.19949:18833 426.20285:4908	61.98814:7686 125.05734:12 282.13361:24 297.1481:36 303.49396:10 319.9241:10 331.19467:36 332.19852:60 406.21024:12 424.19888:60	291887	273857	283378
407	0.931	55.86	424.927	Unknown	[M-H]-		0.333	FALSE	null	null	null	null	null	null	4		FALSE	null	null	null	null	null	null	null	29.23	NEGIDA-2	424.92673:1057 425.93008:202 426.93344:75		10467	9618	10073
408	12.499	749.94	425.147	w/o MS2:Ginkgolide B; PlaSMA ID-2311	[M-H]-		1	TRUE	5.36	425.144	C20H24O10	Ginkgolides and bilobalides	SQOJOAFXDQDRGF-UHFFFAOYNA-N	CC1C(=O)OC2C(O)C34C5CC(C(C)(C)C)C33C(O)C(=O)OC3OC4(C(=O)O5)C12O	3		FALSE	null	null	96.1	99.7	null	null	null	117.96	NEGIDA-3	425.14706:1334 426.15041:708 427.15377:499	146.9752:10 176.97623:12 183.01218:36 216.29131:10 286.93332:10 311.16702:153 312.18216:24 379.35229:10 425.14935:48	12385	11672	12712
409	9.725	583.5	427.208	w/o MS2:NCGC00380692-01!3-[5-hydroxy-7-methoxy-2,3-dimethyl-6-(3-methylbut-2-enyl)-4-oxo-2,3-dihydrochromen-8-yl]hexanoic acid	[M-H]-		1	TRUE	null	427.209	C23H32O6	Chromones	UDVTWMLZUGXNQM-UHFFFAOYNA-N	CCCC(CC(O)=O)C1=C(OC)C(CC=C(C)C)=C(O)C2=C1OC(C)C(C)C2=O	3		FALSE	null	null	99.7	null	null	null	null	447.07	NEGIDA-3	427.20837:3349 428.21172:1454 429.21508:669	61.99149:12 294.91861:10 315.16336:36 331.19232:24 343.19821:36 363.14825:10 377.18982:12 387.19727:302 389.18402:24 407.18344:12 407.20325:128 427.21439:24	21507	19812	21505
410	0.979	58.74	428.028	Unknown	[M-H]-	found in higher mz's MsMs_465	0.667	FALSE	null	null	null	null	null	null	4		FALSE	null	null	null	null	null	null	null	69.59	NEGIDA-1	428.02792:1033 429.03127:375 430.03463:220		7934	7995	8351
411	14.712	882.72	432.899	w/o MS2:Cyclic adenosine diphosphate ribose	[M-H]-		1	TRUE	null	432.9	C15H21N5O13P2				3		FALSE	null	null	99.6	null	null	null	null	37.19	NEGIDA-1	432.89914:1522 433.90249:312 434.90585:129	177.00777:10 200.04147:10 234.88947:10 248.91821:10 256.92523:12 256.95447:12 262.86926:12 262.87836:24 270.95273:10 276.90424:24 286.87366:12 304.87292:12 326.90475:12 344.92728:12 346.89664:36 348.87686:24 360.91379:10 388.9064:12 388.923:24 412.95047:10 432.87589:12 432.91092:24	19152	18831	17939
412	9.717	583.02	435.199	w/o MS2:NCGC00385247-01_C21H32O8_(3S,3aS,6E,9S,10E,11aS)-3,6,10-Trimethyl-2-oxo-2,3,3a,4,5,8,9,11a-octahydrocyclodeca[b]furan-9-yl beta-D-glucopyranoside	[M-H]-		1	TRUE	null	435.199	C21H32O8	Germacranolides and derivatives	OWPORVMZZJAHEF-UHFFFAOYNA-N	CC1C2CCC(C)=CCC(OC3OC(CO)C(O)C(O)C3O)C(C)=CC2OC1=O	3		FALSE	null	null	100	null	null	null	null	179.94	NEGIDA-1	435.19876:1604 436.20211:859 437.20547:929	72.99126:36 127.05054:10 244.89198:10 278.90088:10 297.15717:10 312.89594:10 328.88309:10 343.1947:10 382.80704:10 404.04428:10 435.19:24	11153	9215	10764
413	10.396	623.76	435.237	w/o MS2:NCGC00380375-01!6-[(4E,6E)-2,3-dihydroxy-4,6-dimethyl-7-(1,2,4-trimethyl-3,6-dioxabicyclo[3.1.0]hexan-4-yl)hepta-4,6-dien-2-yl]-4-methoxy-3,5-dimethylpyran-2-one	[M-H]-		1	TRUE	null	435.238	C24H34O7	Fatty alcohols	UXTZIHZDUIRZDY-UHFFFAOYNA-N	COC1=C(C)C(=O)OC(=C1C)C(C)(O)C(O)C(C)=CC(C)=CC1(C)OC(C)C2(C)OC12	3		FALSE	null	null	99.5	null	null	null	null	612.6	NEGIDA-1	435.23676:4262 436.24011:2198 437.24347:419	89.02417:896 371.19608:24	27068	25231	26464
414	14.154	849.24	437.198	w/o MS2:NCGC00385772-01!5,7-dihydroxy-3-[4-hydroxy-2-methoxy-5-(2-methylbut-3-en-2-yl)phenyl]-6-(3-methylbut-2-enyl)-2,3-dihydrochromen-4-one	[M-H]-		1	TRUE	null	437.197	C26H30O6	2'-O-methylated isoflavonoids	UTHDGFYWNZCMEW-UHFFFAOYNA-N	COC1=C(C=C(C(O)=C1)C(C)(C)C=C)C1COC2=C(C(O)=C(CC=C(C)C)C(O)=C2)C1=O	3		FALSE	null	null	99.4	null	null	null	null	331.98	NEGIDA-2	437.19806:2660 438.20141:1356 439.20477:792	114.98802:60 158.98047:36 255.23831:24 275.08774:10 277.20157:24 279.21335:12 281.23004:24 323.21155:24 325.22168:118 369.20294:127 437.29752:36	30525	28504	30443
415	1.823	109.38	437.212	Pantothenic acid	[M-H]-		1	TRUE	null	437.214	C9H17NO5				2		FALSE	null	null	83.3	null	67.4	75	100	201.08	NEGIDA-3	437.21277:1409 438.21612:596 439.21948:79	71.01366:12 111.02092:10 146.08594:48 218.10242:366	9941	9571	9084
416	12.375	742.5	437.288	Unknown	[M-H]-		1	TRUE	null	null	null	null	null	null	4		FALSE	null	null	null	null	null	null	null	162.6	NEGIDA-1	437.29037:1106 438.29372:787 439.29708:113	227.99794:2 254.9619:5 311.17157:35 325.22055:7 369.12622:5 391.258:7 391.28296:393 437.28427:7	13334	15877	8410
417	11.284	677.04	437.291	Unknown	[M-H]-		0.667	TRUE	null	null	null	null	null	null	4		FALSE	null	null	null	null	null	null	null	160.38	NEGIDA-2	437.29111:1114 438.29446:495 439.29782:105	61.98924:109 375.23636:6 391.28931:485	6718	7118	7086
418	7.096	425.76	438.124	w/o MS2:Glycan Sialylated tetraose type 2	[M-H]-		0.333	TRUE	null	438.131	C31H52N2O24				3		FALSE	null	null	81.9	null	null	null	null	49.3	NEGIDA-3	438.12439:1003 439.12774:557 440.1311:105	61.98807:160 216.08507:10 241.06863:12 318.84348:10 328.94696:10 352.93878:10	6236	5808	6490
419	12.499	749.94	447.141	w/o MS2:NCGC00347866-02!N-(7,8-dimethoxy-2-oxochromen-3-yl)-4a,5,8-trihydroxy-N-methyl-4,5,8,8a-tetrahydro-1,2-benzoxazine-3-carboxamide	[M-H]-		1	TRUE	null	447.14	C21H22N2O9	Coumarins and derivatives	PCMUPOUDXMFDRE-UHFFFAOYNA-N	COC1=C(OC)C2=C(C=C1)C=C(N(C)C(=O)C1=NOC3C(O)C=CC(O)C3(O)C1)C(=O)O2	3		FALSE	null	null	99.3	null	null	null	null	92.49	NEGIDA-1	447.14099:2178 448.14434:752 449.1477:430	154.97731:12 183.00076:12 255.23994:10 311.16696:608 379.16376:48	23109	22067	22396
420	11.733	703.98	449.172	w/o MS2:3-Hydroxykynurenine	[M-H]-	similar chromatogram in higher mz_429	1	TRUE	null	449.167	C10H12N2O4				3		FALSE	null	null	88.1	null	null	null	null	413.52	NEGIDA-3	449.17172:3579 450.17507:1907 451.17843:2717	176.99129:10 199.15811:12 236.37318:10 246.91135:10 269.1394:12	19946	20184	22273
421	9.718	583.08	449.216	w/o MS2:PyroGlu-Tyr-Arg	[M-H]-		0.667	FALSE	null	449.214	C20H28N6O6				3		FALSE	null	null	99.1	null	null	null	null	176.75	NEGIDA-1	449.21561:1133 450.21896:680 451.22232:18320		8642	6533	6791
422	9.725	583.5	451.231	w/o MS2:Glycolic acid pentaethoxylate 4-tert-butylphenyl ether	[M-H]-		1	TRUE	null	451.23	C22H36O8				3		FALSE	null	null	99.8	null	null	null	null	1424.38	NEGIDA-3	451.2309:11155 452.23425:5628 453.23761:1070	89.02299:1425 387.18597:12 387.1915:24 451.16309:24 451.23758:60	75530	69882	72995
423	14.621	877.26	452.943	Unknown	[M-H]-	found in higher mz's MsMs_495; found in higher mz's MsMs_441	1	TRUE	null	null	null	null	null	null	4		FALSE	null	null	null	null	null	null	null	48.2	NEGIDA-1	452.9429:2405 453.94625:416 454.94961:238	84.0064:10 187.06821:10 227.0253:10 280.94278:48 322.94635:12 324.92786:24 366.91806:12 366.9476:60 452.94315:243	34646	34020	33437
424	11.609	696.54	453.286	w/o MS2:NCGC00380550-01_C24H40O5_4-{[5-(6-Hydroxy-5,5,8a-trimethyl-2-methylenedecahydro-1-naphthalenyl)-3-methylpentyl]oxy}-4-oxobutanoic acid	[M-H]-		1	TRUE	null	453.286	C24H40O5	Diterpenoids	PEFFBGFCZXFQSX-UHFFFAOYNA-N	CC(CCOC(=O)CCC(O)=O)CCC1C(=C)CCC2C(C)(C)C(O)CCC12C	3		FALSE	null	null	100	null	null	null	null	219.62	NEGIDA-2	453.28583:1681 454.28918:822 455.29254:159	251.19406:9 287.2377:3 325.24902:9 343.25504:28 345.27957:21 389.28329:9 406.01224:9 407.2821:1677 452.93716:15	10713	11524	10589
425	0.924	55.44	453.883	Unknown	[M-H]-		1	TRUE	null	null	null	null	null	null	4		FALSE	null	null	null	null	null	null	null	50.25	NEGIDA-3	453.87796:1331 454.88131:362 455.88467:134	210.86023:12 242.89944:10 250.89426:24 250.90536:36 268.91644:10 293.89584:12 294.88245:60 294.89688:60 333.96481:10	15660	13312	14362
426	1.114	66.84	455.102	w/o MS2:(+)-Fluprostenol methyl ester	[M-H]-		1	TRUE	null	455.1	C24H31F3O6				3		FALSE	null	null	97.3	null	null	null	null	107.44	NEGIDA-2	455.10236:2057 456.10571:611 457.10907:139	68.99525:48 112.98734:360 166.93219:10 260.8746:10 423.9068:10	15721	16089	15828
427	11.765	705.9	456.257	Unknown	[M-H]-		1	TRUE	null	null	null	null	null	null	4		FALSE	null	null	null	null	null	null	null	285.37	NEGIDA-1	456.25525:1862 457.2586:1065 458.26196:187	112.98421:461 116.03977:10 199.1617:12 199.1716:60 228.90527:10 267.14548:24 267.15005:135	13313	14113	14194
428	14.162	849.72	459.194	w/o MS2:NCGC00385056-01_C23H32O8_Propanoic acid, 2-methyl-, [(4S)-4-(acetyloxy)-5-[4-(acetyloxy)-1-methylbutyl]-2,3,3a,4,7,7a-hexahydro-3-methylene-2-oxo-6-benzofuranyl]methyl ester	[M-H]-	found in higher mz's MsMs_482; found in higher mz's MsMs_462	1	TRUE	null	459.199	C23H32O8	Terpene lactones	AAHSTEUFCXJGIV-UHFFFAOYNA-N	CC(C)C(=O)OCC1=C(C(C)CCCOC(C)=O)C(OC(C)=O)C2C(C1)OC(=O)C2=C	3		FALSE	null	null	89	null	null	null	null	325.05	NEGIDA-2	459.19412:2749 460.19747:769 461.20083:354	102.96093:24 112.98459:48 168.19974:10 255.23383:123 311.03412:10 323.22415:103 347.13547:12 459.11945:12	26177	28698	25989
429	11.733	703.98	459.2	w/o MS2:Leukotriene E4 methyl ester	[M-H]-		1	TRUE	null	459.2	C24H39NO5S				3		FALSE	null	null	100	null	null	null	null	1476.27	NEGIDA-2	459.20001:11288 460.20336:5684 461.20672:1399	86.03029:5 112.96964:6 174.90977:5 186.92459:6 227.108:5 238.91817:6 246.88959:5 311.0365:5 322.90643:6 326.93359:5 336.88284:5 351.16061:5 370.92685:5 391.18433:5 439.18228:6 459.2756:18	67769	67934	66096
430	14.745	884.7	459.915	Unknown	[M-H]-		1	TRUE	null	null	null	null	null	null	4		FALSE	null	null	null	null	null	null	null	69.36	NEGIDA-1	459.91382:1937 460.91717:985 461.92053:254	171.94479:10 211.96478:12 215.9301:12 240.94412:10 253.94162:24 255.96378:48 268.88565:10 271.95764:24 286.89719:10 299.94858:67 327.93991:12 327.95514:12 343.9353:60 357.87448:10 399.92169:10 415.92517:24 459.9053:12	25512	27362	24191
431	12.799	767.94	461.158	w/o MS2:Oxytetracycline	[M-H]-		1	TRUE	null	461.155	C22H24N2O9				3		FALSE	null	null	96.5	null	null	null	null	79.24	NEGIDA-2	461.15814:2174 462.16149:841 463.16485:436	183.01428:36 256.91678:24 315.93051:10 325.18591:696 393.14481:12 393.17264:48	22591	23437	23171
432	1.823	109.38	462.172	w/o MS2:Morphine_3_Glucuronide; LC-ESI-QTOF; MS2; CE	[M-H]-		1	TRUE	null	462.176	C23H27NO9	Morphinans	WAEXKFONHRHFBZ-UHFFFAOYNA-N	CN1CCC23C4OC5=C(OC6OC(C(O)C(O)C6O)C(O)=O)C=CC(CC1C2C=CC4O)=C35	3		FALSE	null	null	94.1	null	null	null	null	409.78	NEGIDA-1	462.17239:3995 463.17574:2124 464.1791:396	71.01219:36 76.98531:10 88.04228:393 116.06538:12 146.08028:476 218.1057:1263	26811	25038	24678
433	11.462	687.72	462.961	Perfluorononanoic acid; LC-ESI-ITFT; MS2; CE	[M-H]-		1	TRUE	null	462.963	C9HF17O2	Perfluorooctanoic acid and derivatives	UZUFPBIDKMEQEQ-UHFFFAOYSA-N	OC(=O)C(F)(F)C(F)(F)C(F)(F)C(F)(F)C(F)(F)C(F)(F)C(F)(F)C(F)(F)F	2		FALSE	null	null	83.2	null	63	83.6	100	71.75	NEGIDA-2	462.961:2285 463.96435:426 464.96771:73	92.92891:2 102.95798:4 112.98895:4 117.0651:1 118.99253:5 146.96349:2 150.97925:2 168.98991:90 173.57304:1 174.96161:4 190.93024:4 206.99841:1 214.93034:2 218.95432:4 218.98544:75 224.9319:2 242.93875:5 250.95642:2 258.91016:4 266.95358:2 268.98077:8 278.939:2 282.95407:2 292.92764:2 300.90726:2 310.85083:2 310.91266:2 316.99841:2 326.86746:2 332.88657:2 350.90814:4 398.89706:1 417.23746:2 418.97…	13067	13640	15035
434	9.725	583.5	463.17	Unknown	[M-H]-		1	TRUE	null	null	null	null	null	null	4		FALSE	null	null	null	null	null	null	null	164.51	NEGIDA-2	463.16995:1462 464.1733:678 465.17666:482	100.95278:12 100.95842:48 241.76413:10 266.93298:10 297.1337:12 315.15582:12 326.92328:12 331.17694:36 331.1897:140 338.92706:10 418.84906:12	9694	9302	8892
435	9.725	583.5	465.209	w/o MS2:16-Glucuronide-estriol	[M-H]-		1	TRUE	null	465.212	C24H32O9	Steroidal glycosides	FQYGGFDZJFIDPU-UHFFFAOYNA-N	O=C(O)C1OC(OC2CC3C4CCC5=CC(O)=CC=C5C4CCC3(C)C2O)C(O)C(O)C1O	3		FALSE	null	null	97.1	null	null	null	null	111.12	NEGIDA-2	465.2095:1350 466.21285:659 467.21621:567	59.01369:48 100.9643:12 103.00378:247 333.19711:24 389.14059:36	8555	8706	8837
436	13.46	807.6	465.231	w/o MS2:Unknown (carbon number 21); PlaSMA ID-1283	[M-H]-		1	TRUE	4.16	465.232	C21H38O11	NA			3		FALSE	null	null	99.8	99.6	null	null	null	129.56	NEGIDA-3	465.23129:1638 466.23464:840 467.238:615	114.99049:24 143.04492:12 158.97266:24 281.24286:10 307.2377:24 353.25684:100 371.29807:10 397.24463:253 419.29822:24 465.35593:24	25318	27552	28877
437	14.354	861.24	467.371	Unknown	[M-H]-		1	TRUE	null	null	null	null	null	null	4		FALSE	null	null	null	null	null	null	null	133.74	NEGIDA-1	467.36981:1402 468.37316:575 469.37652:121	111.01328:2 200.98102:2 255.24225:5 263.04239:5 331.18414:5 355.25864:5 399.2356:5 412.88535:2 467.40759:7 467.45306:14	11077	11828	10675
438	1.052	63.12	472.176	Unknown	[M-H]-	similar chromatogram in higher mz_452; similar chromatogram in higher mz_476	1	TRUE	null	null	null	null	null	null	4		FALSE	null	null	null	null	null	null	null	376.52	NEGIDA-1	472.17569:2520 473.17904:1659 474.1824:421	59.0134:24 71.02051:12 88.03839:108 95.01556:10 113.02744:36 119.03509:48 130.06067:246 143.03171:24 161.04675:12 179.05496:48 341.11154:178 472.16742:36	16292	15637	16340
439	13.066	783.96	475.171	Unknown	[M-H]-		1	TRUE	null	null	null	null	null	null	4		FALSE	null	null	null	null	null	null	null	194.18	NEGIDA-1	475.17078:1802 476.17413:696 477.17749:353	80.97994:5 112.9844:12 157.00583:12 183.01039:18 249.03812:12 318.8938:5 339.198:602 407.18588:44 475.28485:12	17358	15856	16715
440	9.725	583.5	475.192	w/o MS2:NCGC00381068-01_C20H27NO11_{[2-O-(6-Deoxy-alpha-L-mannopyranosyl)-beta-D-glucopyranosyl]oxy}(4-hydroxyphenyl)acetonitrile	[M-H]-		1	TRUE	null	475.192	C20H27NO11	Cyanogenic glycosides	OJPOTPLCXUWMGI-UHFFFAOYNA-N	CC1OC(OC2C(OC(C#N)C3=CC=C(O)C=C3)OC(CO)C(O)C2O)C(O)C(O)C1O	3		FALSE	null	null	99.9	null	null	null	null	500.44	NEGIDA-3	475.19177:4116 476.19512:1998 477.19848:709	68.99647:185 111.006:10 112.98593:785 126.98283:12 172.98592:12 399.15192:36 429.18759:24 431.16852:12 445.18637:36	28152	26223	26792
441	14.63	877.8	481.897	Unknown	[M-H]-	similar chromatogram in higher mz_460; similar chromatogram in higher mz_495	1	TRUE	null	null	null	null	null	null	4		FALSE	null	null	null	null	null	null	null	56.16	NEGIDA-1	481.8952:1789 482.89855:381 483.90191:187	242.94952:12 251.90363:10 286.93588:12 293.94128:36 309.91171:12 321.91132:12 321.93396:71 331.90195:10 337.92838:36 365.90863:12 365.9274:60 481.86597:12 481.89059:36	24441	26044	24603
442	11.947	716.82	482.293	w/o MS2:Tauroursodeoxycholic acid	[M-H]-		0.667	TRUE	null	482.293	C26H45NO6S				3		FALSE	null	null	99.9	null	null	null	null	136.3	NEGIDA-2	482.29297:1220 483.29632:710 484.29968:263	72.99503:3 202.98242:3 311.17725:3 346.90518:4 380.88669:3 422.82507:3 455.40915:3 482.29416:383	6880	7960	6716
443	10.882	652.92	483.15	w/o MS2:NCGC00168898-03!4-hydroxy-7-methyl-2-[2-[3,4,5-trihydroxy-6-(hydroxymethyl)oxan-2-yl]oxypropan-2-yl]-2,3-dihydrofuro[3,2-g]chromen-5-one	[M-H]-		1	TRUE	null	483.151	C21H26O10	Furanochromones	KHWKLNXMSVVKCH-UHFFFAOYNA-N	CC1=CC(=O)C2=C(O1)C=C1OC(CC1=C2O)C(C)(C)OC1OC(CO)C(O)C(O)C1O	3		FALSE	null	null	99.6	null	null	null	null	141.65	NEGIDA-2	483.14993:1654 484.15328:524 485.15664:252	61.9892:2 66.00305:1 93.02888:2 104.92964:1 108.02364:6 112.98734:2 171.98561:68 172.99315:15 211.07793:2 242.94286:2 260.93127:2 262.93097:2 278.87076:2 284.93655:4 289.04684:2 312.92606:2 314.90652:2 320.8577:2 324.91254:2 328.89111:2 339.22882:2 350.95505:2 352.88358:4 354.88342:2 362.8912:2 366.93668:2 369.01089:2 370.85599:4 375.14917:1 391.16147:1 395.5954:1 403.19101:18 418.9519:4 483.1503…	21307	22205	22597
444	4.219	253.14	483.171	w/o MS2:NCGC00380596-01!2-[3-[(2E)-3,7-dimethylocta-2,6-dienyl]-2,6-dihydroxybenzoyl]-5-formyl-3-hydroxybenzoic acid	[M-H]-		0.333	TRUE	null	483.166	C25H26O7	Benzophenones	HTPFCQBRMHUAEU-UHFFFAOYSA-N	CC(C)=CCCC(C)=CCC1=C(O)C(C(=O)C2=C(C=C(C=O)C=C2O)C(O)=O)=C(O)C=C1	3		FALSE	null	null	88.6	null	null	null	null	118.44	NEGIDA-2	483.17096:1017 484.17431:681 485.17767:108	129.92978:10 237.99312:10 241.08626:181 402.86179:10	5973	5797	5946
445	0.98	58.8	487.101	w/o MS2:Cytidine 5'-diphosphocholine	[M-H]-	found in higher mz's MsMs_465	1	TRUE	null	487.1	C14H26N4O11P2				3	1	FALSE	null	null	99.4	null	null	null	null	96.16	NEGIDA-3	487.10123:2537 488.10458:763 489.10794:157	127.04636:10 145.06235:48 250.00471:10 268.00696:12 304.03732:60 330.93262:10 428.02719:48	19273	18500	20038
446	1.816	108.96	487.131	w/o MS2:Uvedalin	[M-H]-		1	TRUE	null	487.137	C23H28O9	Germacranolides and derivatives	JIEVJXRUYDZFTD-UHFFFAOYNA-N	COC(=O)C1=CCCC(C)=CC2OC(=O)C(=C)C2C(OC(=O)C2(C)OC2C)C1OC(C)=O	3		FALSE	null	null	84.7	null	null	null	null	132.95	NEGIDA-2	487.13074:1410 488.13409:471 489.13745:153	110.01662:12 110.02397:68 111.02364:24 132.03558:12 146.08731:12 152.03728:48 200.04169:12 200.05359:193 243.05869:328	8698	8995	8478
447	4.365	261.9	487.168	w/o MS2:Unknown (carbon number 18); PlaSMA ID-2620	[M-H]-		1	TRUE	4.79	487.167	C18H30O15	NA			3		FALSE	null	null	99.1	100	null	null	null	716.44	NEGIDA-1	487.16824:7360 488.17159:4578 489.17495:2374	122.09801:60 162.94962:10 165.10146:113 166.08685:166 178.98366:10 191.08292:24 199.09441:132 200.0732:436 205.45517:10 209.09569:48 234.40822:10 243.08247:4095 299.02652:10 487.17804:24	47727	46280	44141
448	13.452	807.12	487.226	w/o MS2:4-Androsten-17.beta.-ol-3-one glucosiduronate	[M-H]-		1	TRUE	null	487.23	C25H36O8				3		FALSE	null	null	89.8	null	null	null	null	83.23	NEGIDA-3	487.22556:1532 488.22891:442 489.23227:139	112.98405:36 283.2645:108 351.24582:60	21756	24058	26261
449	14.777	886.62	488.868	Unknown	[M-H]-		1	TRUE	null	null	null	null	null	null	4		FALSE	null	null	null	null	null	null	null	74.16	NEGIDA-1	488.86795:2984 489.8713:864 490.87466:308	175.85265:24 198.9162:24 224.927:10 230.87207:48 245.84084:12 270.89478:380 272.87662:60 284.90521:12 312.89319:12 312.91055:121 314.88348:24 349.88321:10 356.89615:125 488.8476:12	35181	34721	35131
450	14.706	882.36	492.939	Unknown	[M-H]-	found in higher mz's MsMs_456	0.667	TRUE	null	null	null	null	null	null	4		FALSE	null	null	null	null	null	null	null	42.14	NEGIDA-1	492.93887:1627 493.94222:327 494.94558:1374	198.9579:10 216.90826:36 220.99438:10 260.89246:10 318.82568:10 416.9129:10 447.17038:10 448.95456:12 452.94241:24 472.93271:36 492.9155:12	28537	25531	27030
451	14.271	856.26	495.405	Unknown	[M-H]-		0.667	TRUE	null	null	null	null	null	null	4		FALSE	null	null	null	null	null	null	null	110.7	NEGIDA-2	495.40265:1039 496.406:391 497.40936:150	113.0202:3 132.98172:4 133.49167:3 243.04573:3 269.2153:4 283.2583:4 297.92456:3 325.22626:3 359.1846:8 365.87643:3 369.20779:4 383.19467:3 419.41443:3 427.1705:4 435.23755:3 449.30304:8 457.2605:3 477.40918:4 493.85709:4 495.38547:8 495.45728:12	11886	11487	12615
452	1.052	63.12	496.176	w/o MS2:NCGC00169106-02![(2R,3S,4S,5R,6R)-6-[2-(3,4-dihydroxyphenyl)ethoxy]-3,4,5-trihydroxyoxan-2-yl]methyl (E)-3-(3,4-dihydroxyphenyl)prop-2-enoate	[M-H]-		1	TRUE	null	496.181	C23H26O11	Coumaric acids and derivatives	LFKQVVDFNHDYNK-UHFFFAOYNA-N	OC1C(COC(=O)C=CC2=CC(O)=C(O)C=C2)OC(OCCC2=CC(O)=C(O)C=C2)C(O)C1O	3		FALSE	null	null	87.5	null	null	null	null	335.29	NEGIDA-1	496.17618:4591 497.17953:2464 498.18289:564	80.01343:10 93.03957:24 110.06651:12 136.04431:12 136.05249:48 137.03743:123 154.06017:1753 322.02905:10 341.10895:24 496.12784:12	30219	27502	26456
453	11.232	673.92	497.166	w/o MS2:NCGC00380738-01!3,5-dihydroxy-4-[3,4,5-trihydroxy-6-[[4-(2-hydroxypropan-2-yl)cyclohexene-1-carbonyl]oxymethyl]oxan-2-yl]oxybenzoic acid	[M-H]-		1	TRUE	null	497.166	C23H30O12	Saccharolipids	PEERGVFNQUXNQA-UHFFFAOYNA-N	CC(C)(O)C1CCC(=CC1)C(=O)OCC1OC(OC2=C(O)C=C(C=C2O)C(O)=O)C(O)C(O)C1O	3		FALSE	null	null	100	null	null	null	null	722.31	NEGIDA-1	497.16638:8344 498.16973:3178 499.17309:1636	61.99125:4 93.03:8 108.02046:22 171.98335:452 172.99089:122 204.93863:3 289.05573:4 342.93195:8 353.23849:8 360.89203:8 394.91415:8 417.18448:4 417.21027:98 479.77029:3 495.59949:8 497.16806:1029	125449	120223	119469
454	14.162	849.72	505.187	w/o MS2:NCGC00169840-02![2-(4-hydroxy-3-methoxyphenyl)-4-[(4-hydroxy-3-methoxyphenyl)methyl]oxolan-3-yl]methyl (E)-3-(4-hydroxyphenyl)prop-2-enoate	[M-H]-	found in higher mz's MsMs_477	1	TRUE	null	505.187	C29H30O8	7,9'-epoxylignans	ZNVUQZAVBXKEGF-UHFFFAOYNA-N	COC1=C(O)C=CC(CC2COC(C2COC(=O)C=CC2=CC=C(O)C=C2)C2=CC(OC)=C(O)C=C2)=C1	3		FALSE	null	null	99.9	null	null	null	null	164.31	NEGIDA-2	505.18713:1641 506.19048:769 507.19384:499	104.63708:10 148.94263:12 158.98062:95 277.88409:10 323.23199:12 325.22198:60 369.1925:48 369.21677:242 421.224:10 437.19528:24 505.20212:24	17650	19443	19023
455	4.365	261.9	509.149	w/o MS2:.beta.-Estradiol-3-glucuronide-17-sulfate	[M-H]-		1	TRUE	null	509.149	C24H32O11S				3		FALSE	null	null	99.9	null	null	null	null	271.57	NEGIDA-2	509.14917:3416 510.15252:2024 511.15588:1121	166.0923:36 200.06133:24 200.07323:60 221.07364:24 225.06395:10 243.08032:428 247.20633:10 264.24222:24 265.06589:789 509.12286:125 509.164:60	22157	22263	20816
456	14.712	882.72	510.945	Unknown	[M-H]-		1	TRUE	null	null	null	null	null	null	4		FALSE	null	null	null	null	null	null	null	38.25	NEGIDA-1	510.94455:1657 511.9479:250 512.95126:1246	258.63657:24 292.87177:12 294.85522:24 336.86902:143 360.96173:12 362.94421:24 378.8877:36 386.91757:24 422.8819:36 430.93762:36 448.96344:24 472.88998:12 472.93268:180 474.94476:36 492.91238:24 492.9404:205 510.95993:24	24197	25666	25087
457	12.501	750.06	515.132	w/o MS2:NCGC00384750-01_C20H28O14_alpha-D-Glucopyranoside, beta-L-fructofuranosyl, 6-(4-hydroxy-3-methoxybenzoate)	[M-H]-		0.667	TRUE	null	515.137	C20H28O14	Hydrolyzable tannins	CFTZBGSPPBNRNF-UHFFFAOYNA-N	COC1=C(O)C=CC(=C1)C(=O)OCC1OC(OC2(CO)OC(CO)C(O)C2O)C(O)C(O)C1O	3		FALSE	null	null	89.6	null	null	null	null	154.32	NEGIDA-3	515.13232:1142 516.13567:355 517.13903:293	102.02076:12 164.93407:12 212.93208:10 232.94203:10 275.45477:10 298.21249:10 311.16949:341 334.91843:12 379.15292:48 415.13113:10 469.44128:10 514.90863:24	12225	12081	11840
458	0.909	54.54	519.049	D-Fructose 6-phosphate	[M-H]-		1	TRUE	null	519.052	C6H13O9P				2		FALSE	null	null	90.6	null	84.8	86.4	100	49.26	NEGIDA-3	519.04932:1909 520.05267:772 521.05603:232	78.9633:12 96.96836:48 138.99352:12 168.98994:24 223.00098:12 259.00723:12 259.02304:295	12093	11386	12191
459	11.224	673.44	519.146	w/o MS2:N-[Tris(hydroxymethyl)methyl]-3-amino-2-hydroxypropanesulfonic acid	[M-H]-		1	TRUE	null	519.152	C7H17NO7S				2		FALSE	null	null	66	null	null	null	null	177.79	NEGIDA-1	519.14642:1769 520.14977:636 521.15313:291	92.93421:2 112.98883:2 128.00732:2 269.22668:2 306.97556:2 312.98068:2 358.92667:7 386.92358:5 390.98956:10 400.95813:10 442.96356:2 472.92719:26 517.53442:2 519.15015:103	26989	25512	25380
460	14.621	877.26	524.96	Unknown	[M-H]-		1	TRUE	null	null	null	null	null	null	4		FALSE	null	null	null	null	null	null	null	32.05	NEGIDA-1	524.96387:1189 525.96722:233 526.97058:248	163.74037:10 328.93707:10 341.92078:10 350.94211:36 362.93948:12 400.7449:10 406.93121:10 410.94717:12 418.97794:36 420.95245:48 430.96747:12 438.91437:12 448.9523:24 462.76819:10 472.93347:75 474.94861:36 480.79211:10 492.93497:36 506.91724:12 506.96146:96 524.71906:12	20667	19825	20339
461	4.365	261.9	525.12	Unknown	[M-H]-		1	TRUE	null	null	null	null	null	null	4		FALSE	null	null	null	null	null	null	null	98.05	NEGIDA-1	525.12128:1155 526.12463:593 527.12799:497	167.04826:10 200.06956:24 236.93411:10 243.08725:145 281.03445:36 507.11301:24 525.10779:126	7761	7848	7365
462	14.154	849.24	527.181	w/o MS2:NCGC00380698-01_C24H30O13_Cyclopenta[c]pyran-4-carboxylic acid, 1-(beta-D-glucopyranosyloxy)-1,4a,5,6,7,7a-hexahydro-4a-hydroxy-7-methyl-5-oxo-, 2-(3,4-dihydroxyphenyl)ethyl ester, (1S,4aR,7aR)-	[M-H]-	found in higher mz's MsMs_482	1	TRUE	null	527.176	C24H30O13	Iridoid O-glycosides	KQBFNIVRWYGXRN-UHFFFAOYNA-N	CC1CC(=O)C2(O)C1C(OC1OC(CO)C(O)C(O)C1O)OC=C2C(=O)OCCC1=CC(O)=C(O)C=C1	3		FALSE	null	null	89.3	null	null	null	null	177.11	NEGIDA-2	527.18091:1809 528.18426:670 529.18762:296	102.95381:12 102.96378:24 112.98459:113 170.99419:10 180.96733:12 180.97678:24 207.91167:10 238.91606:12 244.96959:10 249.04071:12 255.23607:60 306.91226:12 314.97931:12 323.21909:87 344.90491:12 383.25015:10 430.92441:10 454.94885:10 459.2066:24 526.91632:12	19091	19565	19774
463	12.799	767.94	529.144	Unknown	[M-H]-		1	TRUE	null	null	null	null	null	null	4		FALSE	null	null	null	null	null	null	null	117.61	NEGIDA-3	529.14355:1216 530.1469:498 531.15026:433	89.02571:10 154.94269:12 325.17856:250 393.1618:36 425.10962:10 528.94305:24 528.96887:24	11800	13153	13067
464	12.402	744.12	532.923	w/o MS2:2,3-Diphospho-D-glyceric acid	[M-H]-		1	FALSE	null	532.926	C3H8O10P2				3		FALSE	null	null	97.2	null	null	null	null	81.65	NEGIDA-1	532.9234:3134 533.92675:672 534.93011:2053		30020	24638	24387
465	0.98	58.8	533.105	w/o MS2:NCGC00380871-01_C22H27ClO13_(1R,4S,5R,6S,7R,8S)-5-Chloro-9-(beta-D-glucopyranosyloxy)-4-hydroxy-2,10-dioxatricyclo[5.3.1.0~4,8~]undec-6-yl 3,4-dihydroxybenzoate	[M-H]-		1	TRUE	null	533.107	C22H27ClO13	NA	LWSJXQHGEHCKGM-UHFFFAOYNA-N	[H]C12CC3([H])OC(OC4OC(CO)C(O)C(O)C4O)C1([H])C(O)(CO3)C(Cl)C2OC(=O)C1=CC(O)=C(O)C=C1	3		FALSE	null	null	99.2	null	null	null	null	688.42	NEGIDA-2	533.10541:6148 534.10876:1860 535.11212:408	78.95708:36 105.31947:10 110.0359:83 122.98637:48 150.98444:24 158.92024:24 163.05568:24 192.98608:24 229.99994:24 272.96558:36 304.03674:801 322.03992:12 328.96274:10 336.0466:24 336.05945:94 375.11163:10 383.99155:69 385.02008:24 416.02661:60 428.02924:1024 473.05582:12 473.08936:75 487.10184:83	46067	47404	44420
466	1.893	113.58	540.051	Cyclic adenosine diphosphate ribose	[M-H]-	found in higher mz's MsMs_491	1	TRUE	null	540.054	C15H21N5O13P2				2		FALSE	null	null	90.1	null	94.8	85.6	55.6	731.44	NEGIDA-2	540.05383:10846 541.05718:2788 542.06054:619	63.32924:10 78.96082:94 134.03841:12 134.04652:84 158.91316:12 158.92554:154 174.9839:36 211.00485:24 254.93573:12 272.96094:276 328.02478:12 328.04764:262 346.05948:60 408.01013:229 426.01501:79 540.01538:12 540.0545:481	85000	85829	83406
467	13.05	783	543.158	Unknown	[M-H]-		0.333	TRUE	null	null	null	null	null	null	4		FALSE	null	null	null	null	null	null	null	93.35	NEGIDA-1	543.15814:1078 544.16149:373 545.16485:207	102.95503:12 119.94589:10 170.94617:10 198.0354:10 220.99049:10 270.88843:12 281.11429:10 320.87784:10 339.20306:217 365.15503:10 391.2059:10 407.18573:60 474.93927:12 510.92889:12 543.27234:12	9267	9672	9547
468	9.604	576.24	549.292	w/o MS2:MGDG 15:1; MGDG 2:0-13:1; [M+Hac-H]-	[M-H]-		0.667	TRUE	0.73	549.291	C24H42O10	MGDG	OSUNFNJAVCIGRV-WAYWQWQTNA-N	CCC\C=C/CCCCCCCC(=O)OC(COC1OC(CO)C(O)C(O)C1O)COC(C)=O	3		FALSE	null	null	99.7	99.6	null	null	null	92.3	NEGIDA-3	549.29199:1042 550.29534:521 551.2987:90	442.92932:10 473.27924:315 478.6767:10 488.13696:10 503.29041:36	6819	6645	6907
469	0.972	58.32	555.086	w/o MS2:NCGC00385209-01![2-(3,4-dihydroxyphenyl)-5-hydroxy-7-methoxy-4-oxo-3-[(2S,3R,4R,5R,6S)-3,4,5-trihydroxy-6-methyloxan-2-yl]oxychromen-8-yl] acetate	[M-H]-		1	FALSE	null	555.091	C24H24O13	Flavonoid-3-O-glycosides	XCQNRWMPPLJRCM-UHFFFAOYNA-N	COC1=C(OC(C)=O)C2=C(C(O)=C1)C(=O)C(OC1OC(C)C(O)C(O)C1O)=C(O2)C1=CC(O)=C(O)C=C1	3		FALSE	null	null	86	null	null	null	null	83.13	NEGIDA-1	555.08557:1657 556.08892:665 557.09228:193		11548	11271	9636
470	13.452	807.12	555.212	w/o MS2:Unknown (carbon number 26); PlaSMA ID-2854	[M-H]-		1	TRUE	2.76	555.212	C26H34O13	NA			3		FALSE	null	null	99.9	99.4	null	null	null	99.5	NEGIDA-1	555.21191:1116 556.21526:396 557.21862:238	112.9829:24 112.98737:48 130.96774:10 214.91786:12 227.19225:10 266.92819:10 283.27246:24 325.05426:10 351.25479:135 487.23148:12 494.29349:10 555.21674:12	18720	18322	18765
471	1.075	64.5	558.062	Adenosine 5'-diphosphoribose	[M-H]-		1	TRUE	null	558.064	C15H23N5O14P2				2	2	FALSE	null	null	91.9	null	94	92.5	62.5	473.19	NEGIDA-3	558.06305:4077 559.0664:1789 560.06976:385	78.9584:48 96.96847:48 154.05898:10 158.93102:48 211.00305:36 272.96124:24 286.91031:10 290.95105:24 328.03024:12 346.02856:12 346.05466:512 388.05362:10 407.99078:24 408.0191:36 558.02039:12 558.06348:263	32010	30975	30404
472	14.554	873.24	560.96	Unknown	[M-H]-		1	TRUE	null	null	null	null	null	null	4		FALSE	null	null	null	null	null	null	null	30.69	NEGIDA-1	560.96088:1065 561.96423:236 562.96759:235	89.02152:1 102.95778:2 112.98575:5 158.98003:6 176.97052:2 204.99718:2 212.99335:2 220.96111:12 226.96794:2 238.9826:1 244.96233:2 268.95267:2 272.91171:2 272.95804:6 280.94241:4 288.89166:2 288.96078:4 298.92719:5 312.95807:2 322.94846:4 324.94263:2 333.81033:2 340.90967:2 343.96951:1 350.94952:2 356.89658:4 356.94955:2 366.92563:4 366.9498:2 380.91342:4 388.95911:6 398.95514:2 400.9353:2 408.94…	13313	13584	14214
473	5.709	342.54	561.214	1-Methyladenosine	[M-H]-		1	TRUE	null	561.218	C11H15N5O4				2		FALSE	null	null	87.7	null	78.9	82	100	161.06	NEGIDA-2	561.21436:1797 562.21771:1117 563.22107:254	117.01974:6 133.04021:57 148.06236:1201 247.022:5 280.10706:65	10246	10183	10531
474	0.956	57.36	565.045	UDP-D-glucose; LC-ESI-QTOF; MS2; CE	[M-H]-		1	TRUE	null	565.048	C15H24N2O17P2	Pyrimidine nucleotide sugars	HSCJRCZFDFQWRP-JZMIEXBBSA-N	OC[C@H]1O[C@H](OP(O)(=O)OP(O)(=O)OC[C@H]2O[C@H]([C@H](O)[C@@H]2O)N2C=CC(O)=NC2=O)[C@H](O)[C@@H](O)[C@@H]1O	2	2	FALSE	null	null	94	null	92.8	93.4	85.7	490.84	NEGIDA-1	565.04578:14334 566.04913:4067 567.05249:1472	78.95808:344 96.96668:166 111.01901:24 158.91798:36 158.92329:60 164.03984:10 180.99118:10 210.99809:136 240.99425:12 241.00949:317 272.95316:96 280.02374:145 305.00989:36 316.90265:12 320.98022:133 323.03134:2561 384.90335:12 384.98315:281 402.99319:60 467.07941:36 565.05042:1444	109880	111270	108521
475	3.003	180.18	565.174	8-Hydroxy-2'-deoxyguanosine	[M-H]-		1	TRUE	null	565.176	C10H13N5O5				2		FALSE	null	null	80.4	null	75.7	67.2	66.7	249.93	NEGIDA-3	565.1781:3576 566.18145:2116 567.18481:423	150.04152:522 282.08423:1110 547.04523:10	23999	22333	23740
476	1.052	63.12	567.212	w/o MS2:NCGC00169787-02!(2R,3R,4S,5S,6R)-2-[[7-hydroxy-1-(4-hydroxy-3-methoxyphenyl)-3-(hydroxymethyl)-6-methoxy-1,2,3,4-tetrahydronaphthalen-2-yl]methoxy]-6-(hydroxymethyl)oxane-3,4,5-triol	[M-H]-		1	FALSE	null	567.208	C26H34O11	Lignan glycosides	AHYOMNWKYGMYMB-UHFFFAOYNA-N	COC1=C(O)C=C2C(C(COC3OC(CO)C(O)C(O)C3O)C(CO)CC2=C1)C1=CC(OC)=C(O)C=C1	3		FALSE	null	null	92	null	null	null	null	123.83	NEGIDA-1	567.2124:2214 568.21575:1572 569.21911:438		14245	12129	13418
477	14.162	849.72	573.173	w/o MS2:NCGC00347524-02_C23H34O15_Cyclopenta[c]pyran-4-carboxylic acid, 1-[(6-O-beta-D-glucopyranosyl-beta-D-glucopyranosyl)oxy]-1,4a,5,7a-tetrahydro-7-(hydroxymethyl)-, methyl ester, (1S,4aS,7aS)-	[M-H]-		1	TRUE	null	573.179	C23H34O15	Iridoid O-glycosides	FYZYXYLPBWLLGI-UHFFFAOYNA-N	COC(=O)C1=COC(OC2OC(COC3OC(CO)C(O)C(O)C3O)C(O)C(O)C2O)C2C1CC=C2CO	3		FALSE	null	null	88.5	null	null	null	null	125.21	NEGIDA-3	573.17334:1442 574.17669:679 575.18005:478	100.92854:12 114.9891:24 153.65825:10 158.98166:80 226.95297:12 226.96353:48 268.96396:10 294.95865:12 323.21289:24 325.23315:24 353.15176:12 369.21777:222 391.05264:10 417.12173:10 437.17276:24 437.19916:60 442.9805:10 497.96301:10 505.19037:48 540.92682:24 573.16724:12	17422	19389	19349
478	0.909	54.54	579.027	UDP-D-Glucuronic acid; LC-ESI-QTOF; MS2; CE	[M-H]-		1	TRUE	null	579.027	C15H22N2O18P2	Pyrimidine nucleotide sugars	HDYANYHVCAPMJV-LXQIFKJMSA-N	O[C@@H]1[C@@H](COP(O)(=O)OP(O)(=O)O[C@H]2O[C@@H]([C@@H](O)[C@H](O)[C@H]2O)C(O)=O)O[C@H]([C@@H]1O)N1C=CC(O)=NC1=O	2	2	FALSE	null	null	96.2	null	93	93.4	100	661.2	NEGIDA-1	579.02686:14201 580.03021:6347 581.03357:1744	62.96457:8 78.95804:171 96.96802:79 111.01896:341 138.97813:16 150.97357:4 150.98218:16 158.92499:507 160.76018:3 164.99858:20 174.97772:12 176.92735:12 178.97597:12 192.99126:69 211.00818:36 218.97018:8 234.85483:3 236.98097:16 254.18747:8 254.97292:12 254.9953:502 262.0079:8 272.10794:4 272.96228:191 280.0025:4 280.01422:16 290.96646:77 305.02444:245 322.01614:8 323.02615:723 334.9588:16 340.85…	94130	91489	90327
479	1.075	64.5	581.231	w/o MS2:NCGC00169695-02_C27H36O11_[2-(3,4-Dimethoxyphenyl)-5-(3-hydroxypropyl)-7-methoxy-2,3-dihydro-1-benzofuran-3-yl]methyl hexopyranoside	[M-H]-		1	TRUE	null	581.224	C27H36O11	2-arylbenzofuran flavonoids	GOLVEYNUJMICCU-UHFFFAOYNA-N	COC1=CC(CCCO)=CC2=C1OC(C2COC1OC(CO)C(O)C(O)C1O)C1=CC(OC)=C(OC)C=C1	3		FALSE	null	null	85.1	null	null	null	null	553.98	NEGIDA-1	581.23053:7076 582.23388:5967 583.23724:1431	58.03064:48 151.05472:36 166.09769:127 168.07553:817 195.11707:12 195.12491:60 228.03189:10 238.37148:60 239.11476:5416 410.90952:10 581.23053:60	44858	39482	40380
480	0.956	57.36	587.03	w/o MS2:1-(3'-(4-Bromophenyl)-4-(4-chlorophenyl)-2-phenyl-2H,3'H-spiro[phthalazine-1,2'-[1,3,4]thiadiazol]-5'-yl)ethanone	[M-H]-		1	TRUE	null	587.03	C29H20BrClN4OS				3		FALSE	null	null	100	null	null	null	null	107.91	NEGIDA-2	587.03027:2946 588.03362:1480 589.03698:443	112.98599:12 186.9437:10 198.91882:48 235.04053:10 240.92531:36 241.01457:60 280.0246:12 294.92096:12 312.9364:12 312.95126:48 321.01639:12 323.02725:145 337.99307:12 342.96432:36 360.97058:48 398.94476:12 406.96265:36 423.99112:24 424.98224:121 453.99176:78 463.61368:10 466.98383:48 472.0162:12 526.02777:24 544.00867:12 544.02173:36 587.0282:461	18885	20206	19347
481	14.554	873.24	593.931	Unknown	[M-H]-		1	TRUE	null	null	null	null	null	null	4		FALSE	null	null	null	null	null	null	null	36.61	NEGIDA-1	593.92773:1183 594.93108:598 595.93444:199	102.95213:6 287.90814:6 313.93405:12 333.91556:5 343.94107:12 345.9624:12 353.98822:6 358.92917:12 369.91388:6 372.93301:24 373.93579:35 385.94745:12 387.96692:24 389.93073:12 399.90833:6 399.93918:6 401.94147:30 401.94992:37 413.88614:6 413.89468:12 415.9144:30 430.90015:12 431.93716:18 445.91708:90 459.91507:6 471.90579:6 473.92178:42 517.92676:24 530.87268:5 547.89758:18 547.93372:32 561.90186…	17403	17295	18870
482	14.162	849.72	595.17	w/o MS2:Flavonol base + 3O + O-Hex-dHex; PlaSMA ID-2987	[M-H]-		0.333	TRUE	4	595.168	C27H30O15	Flavonoid-3-O-glycosides	RTATXGUCZHCSNG-QHWHWDPRSA-N	CC1C(C(C(C(O1)OCC2C(C(C(C(O2)OC3=C(OC4=CC(=CC(=C4C3=O)O)O)C5=CC=C(C=C5)O)O)O)O)O)O)O	3		FALSE	null	null	98.7	99.5	null	null	null	102.27	NEGIDA-2	595.16962:1019 596.17297:408 597.17633:196	112.98767:211 173.11911:48 248.95685:24 249.03651:24 255.23183:24 271.12006:10 318.87955:10 323.21182:60 339.1575:24 439.3739:36 459.20703:36 517.37634:24 527.17761:24 595.39075:48	11891	11869	12118
483	0.932	55.92	601.005	Unknown	[M-H]-		1	TRUE	null	null	null	null	null	null	4		FALSE	null	null	null	null	null	null	null	69.22	NEGIDA-1	601.0083:1449 602.01165:500 603.01501:280	149.0069:3 254.9953:3 312.95514:56 319.06076:3 323.02362:12 374.93381:9 378.93643:3 381.96194:12 402.99863:15 406.94992:12 424.97787:193 488.97464:12 601.00635:88	10768	10615	9429
484	0.956	57.36	606.071	Uridine 5'-diphospho-N-acetylglucosamine; LC-ESI-QTOF; MS2; CE	[M-H]-		1	TRUE	null	606.074	C17H27N3O17P2	Pyrimidine nucleotide sugars	LFTYTUAZOPRMMI-CFRASDGPSA-N	CC(O)=N[C@H]1[C@@H](OP(O)(=O)OP(O)(=O)OC[C@H]2O[C@H]([C@H](O)[C@@H]2O)N2C=CC(O)=NC2=O)O[C@H](CO)[C@@H](O)[C@@H]1O	2	2	FALSE	null	null	95	null	90	94.5	100	417.61	NEGIDA-1	606.07227:7703 607.07562:3060 608.07898:838	78.95683:100 96.9653:12 111.01606:24 158.92505:144 174.97595:12 176.93677:83 240.0394:12 246.01904:48 260.95575:71 262.01938:12 264.02551:24 272.96011:370 280.03314:12 282.03629:385 300.04337:76 305.00256:24 323.01117:24 323.03134:145 341.97964:24 360.87625:12 362.00681:197 380.01303:24 384.94739:12 384.98315:657 402.996:265 494.04926:24 506.1554:10 604.17743:24 606.06805:1914	62046	64935	59665
485	9.717	583.02	611.24	Unknown	[M-H]-		1	TRUE	null	null	null	null	null	null	4		FALSE	null	null	null	null	null	null	null	150.12	NEGIDA-1	611.23859:1387 612.24194:1246 613.2453:293	232.99747:10 249.03328:498 467.14636:10 505.81497:10 535.07812:10 548.99744:10	8979	8452	9681
486	0.956	57.36	628.057	Unknown	[M-H]-		1	FALSE	null	null	null	null	null	null	4		FALSE	null	null	null	null	null	null	null	111.66	NEGIDA-2	628.05652:1860 629.05987:950 630.06323:269		12354	13274	12073
487	12.499	749.94	645.324	Unknown	[M-H]-		1	TRUE	null	null	null	null	null	null	4		FALSE	null	null	null	null	null	null	null	169.54	NEGIDA-1	645.32776:1487 646.33111:1346 647.33447:561	311.16696:469 375.10016:10 441.13809:24 645.32385:248	11856	11864	11576
488	12.88	772.8	648.909	Unknown	[M-H]-		1	FALSE	null	null	null	null	null	null	4		FALSE	null	null	null	null	null	null	null	90.6	NEGIDA-1	648.90936:2767 649.91271:696 650.91607:2258		25916	23494	24604
489	9.977	598.62	649.781	w/o MS2:3,3',5'-Triiodo-L-thyronine	[M-H]-		1	TRUE	null	649.783	C15H12I3NO4				2		FALSE	null	null	69.1	null	null	null	null	80.06	NEGIDA-1	649.78113:1989 650.78448:497 651.78784:166	61.99138:2 72.00854:8 102.95641:2 107.05789:1 119.94431:4 126.90369:220 349.96777:2 350.98389:2 393.92062:2 435.85773:2 448.83017:4 448.85095:25 461.86017:4 477.88394:4 505.84698:15 511.78818:2 513.92889:2 522.87622:11 543.82147:2 576.76642:6 587.72418:2 610.20544:1 613.72345:2 632.7099:5 632.76282:44 649.77435:62	11716	11307	11257
490	4.427	265.62	657.097	Adenosine 2',3'-cyclic monophosphate	[M-H]-		1	TRUE	null	657.098	C10H12N5O6P				2		FALSE	null	null	87.3	null	92	80.6	50	114.68	NEGIDA-3	657.09894:1101 658.10229:714 659.10565:238	117.0119:6 134.0399:18 134.04802:82 327.01178:6 328.04227:847 621.04529:5 657.0918:18	7544	7400	7215
491	1.893	113.58	662.101	beta-Nicotinamide adenine dinucleotide; LC-ESI-QTOF; MS2; CE	[M-H]-		1	TRUE	null	662.102	C21H27N7O14P2	(5'->5')-dinucleotides	BAWFJGJZGIEFAR-NNYOXOHSSA-N	NC1=C2N=CN([C@@H]3O[C@H](COP([O-])(=O)OP(O)(=O)OC[C@H]4O[C@H]([C@H](O)[C@@H]4O)[N+]4=CC=CC(=C4)C(O)=N)[C@@H](O)[C@H]3O)C2=NC=N1	2	2	FALSE	null	null	97.2	null	95.5	94.4	100	1893.29	NEGIDA-1	662.10236:15664 663.10571:7214 664.10907:1867	71.02422:3 78.95829:113 96.96143:4 96.96834:51 134.04973:172 146.98218:8 158.92726:306 174.98386:99 176.93539:16 192.99188:37 200.93752:4 211.00072:109 214.01222:12 254.9379:4 254.9491:16 272.96085:689 290.9722:12 327.02466:8 328.04758:688 346.05679:373 348.48477:8 356.23514:3 388.06415:8 404.9873:4 404.99295:16 408.01288:522 412.05695:8 424.68152:8 426.02362:603 442.04941:8 442.07593:35 460.0691…	125097	128328	123193
492	10.396	623.76	691.421	w/o MS2:Corticosterone	[M-H]-		1	TRUE	null	691.422	C21H30O4				3		FALSE	null	null	99.8	null	null	null	null	179.85	NEGIDA-3	691.42059:1336 692.42394:1783 693.4273:470	241.15013:12 241.16319:104 327.19034:108 339.02081:10 345.20764:762 679.58722:10	7110	7093	7748
493	13.049	782.94	698.91	Unknown	[M-H]-	found in higher mz's MsMs_500	1	FALSE	null	null	null	null	null	null	4		FALSE	null	null	null	null	null	null	null	373.36	NEGIDA-1	698.91022:13138 699.91357:3143 700.91693:8918		87202	77181	69661
494	5.975	358.5	700.152	Unknown	[M-H]-		0.667	TRUE	null	null	null	null	null	null	4		FALSE	null	null	null	null	null	null	null	109.06	NEGIDA-1	700.15186:1142 701.15521:549 702.15857:198	61.98693:1 78.95815:10 96.96401:4 96.96815:12 135.92171:1 158.92343:2 176.93694:4 211.00237:4 224.69595:1 272.95804:4 319.32681:1 335.08249:2 346.05615:196 353.09671:14 399.31097:1 408.01215:15 415.05371:1 426.01126:5 433.05991:5 468.01691:10 468.03513:12 498.03854:2 509.75928:1 602.18707:2 603.81952:1 625.19312:1 663.79852:2 700.1496:179	6372	6395	5736
495	14.621	877.26	707.924	Unknown	[M-H]-		1	TRUE	null	null	null	null	null	null	4		FALSE	null	null	null	null	null	null	null	41.93	NEGIDA-1	707.93011:1062 708.93346:483 709.93682:188	408.44339:10 441.91647:10 452.94614:24 457.87549:12 457.90552:24 469.92792:36 471.94882:24 477.36935:10 483.89075:12 485.89816:24 497.90149:24 497.92966:24 499.90323:24 513.91968:12 525.90198:12 531.30298:10 541.91022:118 553.90887:12 559.82971:12 569.88269:12 569.91284:36 605.80359:10 623.34027:10 631.87805:24 631.89569:48 631.93097:75 649.93213:12 672.23444:10 675.91211:70 689.87189:10 707.9392…	14027	14305	13956
496	9.717	583.02	723.413	w/o MS2:17,20,21-Trihydroxypregn-1-ene-3,11-dione	[M-H]-		1	TRUE	null	723.411	C21H30O5				2		FALSE	null	null	79.4	null	null	null	null	1237.08	NEGIDA-3	723.41296:8258 724.41631:10108 725.41967:2615	183.32745:10 282.12653:60 297.15292:109 301.17728:60 315.16068:60 329.16104:12 329.17377:107 331.19467:4674 341.17441:10 343.19019:185 343.40329:10 361.2023:298 663.35889:12 705.3819:24 723.40845:223	51586	46710	49446
497	9.717	583.02	731.398	w/o MS2:PG 34:9; PG 16:4-18:5; [M-H]-	[M-H]-		1	TRUE	2.08	731.392	C40H61O10P	PG	UTOHAYFVOGIZMY-KTHSNPCCNA-N	CC\C=C/C\C=C/C\C=C/C\C=C/CCC(=O)OCC(COP(O)(=O)OCC(O)CO)OC(=O)C\C=C/C\C=C/C\C=C/C\C=C/C\C=C/CC	3		FALSE	null	null	93.8	99.7	null	null	null	286.51	NEGIDA-3	731.39764:2209 732.40099:2635 733.40435:736	731.39758:172	13199	12525	13181
498	9.717	583.02	759.386	Unknown	[M-H]-		1	TRUE	null	null	null	null	null	null	4		FALSE	null	null	null	null	null	null	null	331.95	NEGIDA-1	759.38464:2010 760.38799:2193 761.39135:2500	395.94092:12 397.17816:645 400.80319:10	12796	11366	12140
499	9.717	583.02	776.324	Unknown	[M-H]-		1	TRUE	null	null	null	null	null	null	4		FALSE	null	null	null	null	null	null	null	275.57	NEGIDA-2	776.32385:2027 777.3272:2183 778.33056:694	730.31476:10 776.3363:452	10582	12548	11973
500	13.049	782.94	792.9	Unknown	[M-H]-		1	TRUE	null	null	null	null	null	null	4		FALSE	null	null	null	null	null	null	null	82.19	NEGIDA-1	792.89966:2405 793.90301:925 794.90637:1454	102.96075:6 184.98318:52 200.94138:6 200.95529:227 219.93063:5 250.96515:6 250.98293:6 339.18509:6 339.21091:12 366.94492:541 416.97083:12 531.25122:12 532.92377:427 589.13983:12 657.14581:12 698.91156:432	16022	13908	11845

## Sheet: MSDIAL-positive
																												Class	1	1	1
																												File type	Sample	Sample	Sample
																												Injection order	1	2	3
																												Batch ID	1	1	1
Alignment ID	Average Rt(min)	Average Rt(sec)	Average Mz	Metabolite name	Adduct type	Post curation result	Fill %	MS/MS assigned	Reference RT	Reference m/z	Formula	Ontology	INCHIKEY	SMILES	MSI level	Comment	Mannually modified	Isotope tracking parent ID	Isotope tracking weight number	Total score	RT similarity	Dot product	Reverse dot product	Fragment presence %	S/N average	Spectrum reference file name	MS1 isotopic spectrum	MS/MS spectrum	PosIDA-1	PosIDA-2	PosIDA-3
0	14.406	864.36	42.0336	Unknown	[M+H]+		0.667	FALSE	null	null	null	null	null	null	4		FALSE	null	null	null	null	null	null	null	152.39	PosIDA-1	42.03357:318308 43.03692:25249 44.04028:1626		6036044	4756337	2703764
1	14.292	857.52	42.0336	Unknown	[M+H]+		0.333	FALSE	null	null	null	null	null	null	4		FALSE	null	null	null	null	null	null	null	24.64	PosIDA-2	42.03359:316003 43.03694:21630 44.0403:1692		3461443	3093570	724046
2	14.414	864.84	43.0286	Unknown	[M+H]+		0.333	FALSE	null	null	null	null	null	null	4		FALSE	null	null	null	null	null	null	null	61.55	PosIDA-1	43.02855:19516 44.0319:875 45.03526:9843		548777	184424	173626
3	14.518	871.08	43.0286	Unknown	[M+H]+		0.333	FALSE	null	null	null	null	null	null	4		FALSE	null	null	null	null	null	null	null	47.97	PosIDA-3	43.02857:17613 44.03192:926 45.03528:9672		108396	76407	496390
4	14.317	859.02	43.0295	Unknown	[M+H]+		0.333	FALSE	null	null	null	null	null	null	4		FALSE	null	null	null	null	null	null	null	6.39	PosIDA-2	43.0295:19139 44.03285:795 45.03621:9633		218017	188939	47873
5	5.544	332.64	44.0119	Unknown	[M+H]+	found in higher mz's MsMs_59	1	FALSE	null	null	null	null	null	null	4		FALSE	null	null	null	null	null	null	null	23.5	PosIDA-2	44.01189:2453 45.01524:70 46.0186:94		21434	21265	20500
6	1.011	60.66	44.0128	Unknown	[M+H]+	similar chromatogram in higher mz_545; similar chromatogram in higher mz_30; similar chromatogram in higher mz_206; similar chromatogram in higher mz_228; similar chromatogram in higher mz_353; similar chromatogram in higher mz_370; similar chromatogram in higher mz_375	1	TRUE	null	null	null	null	null	null	4		FALSE	null	null	null	null	null	null	null	67.3	PosIDA-2	44.01188:6371 45.01523:281 46.01859:176	44.0115:24 44.01522:196 44.04965:48	60643	58125	57217
7	14.588	875.28	47.0478	Unknown	[M+H]+		1	FALSE	null	null	null	null	null	null	4		FALSE	null	null	null	null	null	null	null	29.3	PosIDA-1	47.04779:2648 48.05114:83 49.0545:44		42239	40361	55637
8	14.414	864.84	56.0481	Unknown	[M+H]+		0.333	FALSE	null	null	null	null	null	null	4		FALSE	null	null	null	null	null	null	null	378.51	PosIDA-1	56.04813:11430 57.05148:517 58.05484:601		214300	177645	94569
9	14.317	859.02	56.0482	Unknown	[M+H]+		0.333	FALSE	null	null	null	null	null	null	4		FALSE	null	null	null	null	null	null	null	39.28	PosIDA-2	56.04816:11629 57.05151:461 58.05487:722		120836	111367	24311
10	1.034	62.04	58.0638	w/o MS2:1-Propanol, 3-amino-	[M+H]+	found in higher mz's MsMs_44; similar chromatogram in higher mz_95; similar chromatogram in higher mz_314; similar chromatogram in higher mz_24; similar chromatogram in higher mz_108; similar chromatogram in higher mz_288	1	FALSE	null	337.237	C20H34O5				3		FALSE	null	null	99.1	null	null	null	null	41.69	PosIDA-2	58.06378:1254 59.06713:1131 60.07049:3231		10734	11169	10609
11	11.637	698.22	59.0594	Unknown	[M+H]+		0.667	FALSE	null	null	null	null	null	null	4		FALSE	null	null	null	null	null	null	null	13.18	PosIDA-1	59.05942:24794 60.06277:997 61.06613:231		453783	249247	281978
12	14.373	862.38	59.0596	Unknown	[M+H]+		0.333	FALSE	null	null	null	null	null	null	4		FALSE	null	null	null	null	null	null	null	115.7	PosIDA-3	59.05956:35022 60.06291:1321 61.06627:405		357422	98485	1094341
13	14.463	867.78	59.0596	w/o MS2:Acetonitrile	[M+H]+		0.667	FALSE	null	320.14	C17H19FN4O4				3		FALSE	null	null	99.7	null	null	null	null	142.07	PosIDA-1	59.05957:35391 60.06292:1542 61.06628:326		642511	769641	231921
14	1.034	62.04	60.0802	w/o MS2:Isopropylamine	[M+H]+	found in higher mz's MsMs_44	1	FALSE	null	298.998	C12H10Cl2N2O4				3		FALSE	null	null	99.8	null	null	null	null	16.34	PosIDA-3	60.08021:1840 61.08356:86 62.08692:30		14469	13610	14282
15	1.011	60.66	61.0383	w/o MS2:Urea	[M+H]+		1	FALSE	null	177	C17H16O4				3		FALSE	null	null	99.2	null	null	null	null	86.12	PosIDA-3	61.03833:7488 62.04168:265 63.04504:113		61827	64876	63863
16	1.134	68.04	71.9505	Unknown	[M+H]+		1	FALSE	null	null	null	null	null	null	4		FALSE	null	null	null	null	null	null	null	27.65	PosIDA-2	71.95053:1700 72.95388:14 73.95724:10		27027	30414	26369
17	2.843	170.58	78.0319	w/o MS2:2-Aminopyridine	[M+H]+	similar chromatogram in higher mz_252; similar chromatogram in higher mz_287; similar chromatogram in higher mz_80; found in higher mz's MsMs_80; similar chromatogram in higher mz_18; similar chromatogram in higher mz_28; similar chromatogram in higher mz_77; found in higher mz's MsMs_28	1	FALSE	null	462.228	C23H37NO5S				3		FALSE	null	null	98.3	null	null	null	null	62.4	PosIDA-1	78.03193:1405 79.03528:92 80.03864:9646		11291	10764	10564
18	2.835	170.1	80.048	w/o MS2:Nicotinic acid	[M+H]+	found in higher mz's MsMs_80	1	TRUE	null	267	C17H14O5				3		FALSE	null	null	98.8	null	null	null	null	116.52	PosIDA-3	80.04796:8277 81.05131:782 82.05467:69	53.04209:81 62.987:12 80.04601:36 80.04852:363	82370	75809	81113
19	1.08	64.8	85.0271	w/o MS2:3-Butenoic acid	[M+H]+	found in higher mz's MsMs_279; found in higher mz's MsMs_132	1	TRUE	null	131.025	C4H3FN2O2				3		FALSE	null	null	97.1	null	null	null	null	173.52	PosIDA-3	85.02709:5737 86.03044:647 87.0338:162	40.96966:238 43.01972:48 48.96939:12 71.94568:12 84.94388:60	51990	52728	53577
20	1.604	96.24	86.0947	1,5-Pentanediamine	[M+H]+	similar chromatogram in higher mz_115	1	TRUE	null	161.128	C7H17N2O2				2		FALSE	null	null	91.8	null	90.1	91.1	77.8	613.05	PosIDA-2	86.09478:25878 87.09813:2711 88.10149:121	41.03981:1453 42.03399:155 43.04099:24 44.05153:279 52.0013:12 56.0463:24 56.0484:182 57.06295:36 67.05276:24 69.07159:785 70.06581:24 86.09962:4394	268508	253496	252007
21	1.332	79.92	87.0433	(R)-3-Hydroxybutyric acid	[M+H]+	found in higher mz's MsMs_136	1	TRUE	null	235.1	C12H10N2O5				2		FALSE	null	null	82.1	null	78.5	80.8	42.9	122.57	PosIDA-3	87.04321:12361 88.04656:709 89.04992:265	43.0189:250 44.01523:12 45.03425:48 70.06815:10 87.04429:60	190773	197606	184633
22	1.073	64.38	88.0748	w/o MS2:N-Methylpropionamide	[M+H]+		1	FALSE	null	277.107	C15H16O5	Kavalactones	RSIWXFIBHXYNFM-UHFFFAOYNA-N	COC1=CC(=O)OC(CCC2=CC3=C(OCO3)C=C2)C1	3		FALSE	null	null	99.6	null	null	null	null	36.13	PosIDA-2	88.07478:4496 89.07813:285 90.08149:318		46792	44717	45723
23	1.835	110.1	90.053	Unknown	[M+H]+	found in higher mz's MsMs_302; similar chromatogram in higher mz_268; similar chromatogram in higher mz_240; similar chromatogram in higher mz_371; similar chromatogram in higher mz_832; found in higher mz's MsMs_268	1	FALSE	null	null	null	null	null	null	4		FALSE	null	null	null	null	null	null	null	100.4	PosIDA-3	90.05298:2747 91.05633:11499 92.05969:3431		20230	18947	20265
24	1.034	62.04	90.0533	w/o MS2:L-Alanine	[M+H]+	found in higher mz's MsMs_95; found in higher mz's MsMs_381	1	FALSE	null	277.128	C12H20O7				3	1	FALSE	null	null	98.5	null	null	null	null	452.03	PosIDA-1	90.05326:11932 91.05661:11680 92.05997:3518		90645	90259	89490
25	12.561	753.66	91.0524	w/o MS2:p-Toluenesulfonic acid	[M+H]+	found in higher mz's MsMs_520; found in higher mz's MsMs_366; found in higher mz's MsMs_324; found in higher mz's MsMs_629	1	FALSE	null	293.212	C18H30O3	Lineolic acids and derivatives	HNBLUNXZQNJFRB-KYLWABQHSA-N	CCCCC[C@H](O)\C=C\C=C/C\C=C/CCCCC(O)=O	3		FALSE	null	null	98.4	null	null	null	null	19.11	PosIDA-1	91.05242:18162 92.05577:4370 93.05913:8295		318150	266233	251468
26	1.31	78.6	95.059	3-Aminopyridine	[M+H]+	found in higher mz's MsMs_54	1	TRUE	null	223.075	C15H12O3				2		FALSE	null	null	85.9	null	80.1	80.2	75	94.46	PosIDA-3	95.05902:18243 96.06237:1594 97.06573:1231	41.03888:189 42.03396:24 54.03111:24 60.98847:60 68.05202:238 93.07479:12 95.0592:559 95.08654:24	249710	254165	245902
27	1.812	108.72	96.0064	w/o MS2:.beta.-Cyano-L-alanine	[M+H]+	similar chromatogram in higher mz_55; found in higher mz's MsMs_55; similar chromatogram in higher mz_903; found in higher mz's MsMs_343	0.667	FALSE	null	323.036	C12H19O2PS3				3		FALSE	null	null	96.3	null	null	null	null	14.6	PosIDA-1	96.00636:1151 97.00971:78 98.01307:434		8196	7538	7588
28	2.835	170.1	96.0435	w/o MS2:Pyrrole-2-carboxaldehyde	[M+H]+		1	TRUE	null	144.045	C9H7NO	Indoles	OLNJUISKUQQNIM-UHFFFAOYSA-N	O=CC1=CNC=2C=CC=CC12	2		FALSE	null	null	63.8	null	null	null	null	68.72	PosIDA-3	96.04347:5104 97.04682:334 98.05018:63	42.03497:12 43.9874:12 60.98642:123 61.28577:10 96.03954:12	38170	39798	40449
29	5.529	331.74	96.0802	Unknown	[M+H]+	similar chromatogram in higher mz_59; found in higher mz's MsMs_59; found in higher mz's MsMs_58; similar chromatogram in higher mz_58	1	TRUE	null	null	null	null	null	null	4		FALSE	null	null	null	null	null	null	null	77.53	PosIDA-1	96.08024:5858 97.08359:1084 98.08695:470	41.03703:8 51.02087:4 53.03883:3 60.984:16 67.04688:4 68.04961:8 77.04066:23 80.04698:12 80.0545:8 81.06019:8 96.08318:20	41243	40612	37111
30	1.011	60.66	97.027	w/o MS2:Furfural	[M+H]+	found in higher mz's MsMs_545	0.667	TRUE	null	469.135	C20H24O10	Phenolic glycosides	CZDNLUMNELLDDD-UHFFFAOYNA-N	OCC1OC(OC2=CC=CC=C2COC(=O)C2(O)C=CCCC2=O)C(O)C(O)C1O	2		FALSE	null	null	65.2	null	null	null	null	18.36	PosIDA-2	97.02703:2415 98.03038:104 99.03374:265	43.01796:24 55.02003:12 60.98847:48 69.07387:12 97.03:12	24754	24909	24899
31	13.822	829.32	98.0947	w/o MS2:Cilastatin	[M+H]+		0.333	FALSE	null	287.237	C20H30O	Retinoids	FPIPGXGPPPQFEQ-OVSJKPMPSA-N	C\C(=C/CO)\C=C\C=C(/C)\C=C\C1=C(C)CCCC1(C)C	3		FALSE	null	null	87.1	null	null	null	null	50.56	PosIDA-1	98.09474:19646 99.09809:2373 100.10145:1019		250205	241953	138482
32	14.349	860.94	98.0949	Unknown	[M+H]+		0.333	FALSE	null	null	null	null	null	null	4		FALSE	null	null	null	null	null	null	null	416.37	PosIDA-3	98.09488:18636 99.09823:2223 100.10159:851		369347	337766	435279
33	13.758	825.48	98.0949	Unknown	[M+H]+		0.333	FALSE	null	null	null	null	null	null	4		FALSE	null	null	null	null	null	null	null	78.4	PosIDA-3	98.09492:18137 99.09827:2178 100.10163:983		82239	78867	507548
34	1.673	100.38	98.0949	w/o MS2:Opipramol	[M+H]+		1	TRUE	null	462.228	C23H37NO5S				2		FALSE	null	null	63.7	null	null	null	null	60.6	PosIDA-1	98.09493:2855 99.09828:517 100.10164:80	41.03798:98 42.03486:58 44.05056:38 55.04603:6 55.05436:110 56.04941:12 69.06803:18 70.06811:69 79.94673:6 80.9366:18 83.0713:12 98.10074:190	24906	25885	25001
35	11.248	674.88	98.9829	Unknown	[M+H]+	found in higher mz's MsMs_559; found in higher mz's MsMs_550; found in higher mz's MsMs_360; found in higher mz's MsMs_673; found in higher mz's MsMs_363; found in higher mz's MsMs_568; found in higher mz's MsMs_668; similar chromatogram in higher mz_668	1	FALSE	null	null	null	null	null	null	4		FALSE	null	null	null	null	null	null	null	38.23	PosIDA-1	98.9829:4690 99.98625:115 100.98961:30		50016	48734	43637
36	0.941	56.46	98.983	Unknown	[M+H]+	found in higher mz's MsMs_332; found in higher mz's MsMs_377; found in higher mz's MsMs_310	1	FALSE	null	null	null	null	null	null	4		FALSE	null	null	null	null	null	null	null	49.22	PosIDA-3	98.98304:5757 99.98639:30 100.98975:147		60957	62434	61528
37	12.476	748.56	98.9831	Unknown	[M+H]+	found in higher mz's MsMs_393	1	FALSE	null	null	null	null	null	null	4		FALSE	null	null	null	null	null	null	null	23.59	PosIDA-2	98.98307:3083 99.98642:48 100.98978:89		27191	37194	28738
38	3.868	232.08	100.111	Cyclohexylamine	[M+H]+		1	TRUE	null	271.06	C15H10O5				2		FALSE	null	null	91.3	null	87.7	91	80	123.36	PosIDA-3	100.11066:6285 101.11401:441 102.11737:201	40.98775:10 41.03804:296 42.03402:9 43.01802:4 43.05574:10 44.0134:5 44.02271:2 46.02786:4 53.00119:5 53.03796:36 53.99717:4 55.0534:1500 56.04844:4 58.02893:6 65.92532:5 67.0528:5 79.05282:2 81.0705:2 82.06982:5 83.08549:373 100.07614:19 100.11262:46	52220	54659	53150
39	0.965	57.9	102.054	w/o MS2:L-Threonine	[M+H]+		0.333	FALSE	null	269.046	C15H10O5				3		FALSE	null	null	99.1	null	null	null	null	3	PosIDA-1	102.05357:1446 103.05692:422 104.06028:212		11944	12773	12790
40	2.493	149.58	102.089	w/o MS2:Betaine aldehyde cation	[M+H]+	found in higher mz's MsMs_270	0.667	TRUE	null	271.169	C18H24O3				2		FALSE	null	null	67.2	null	null	null	null	4.04	PosIDA-3	102.08894:3295 103.09229:196 104.09565:43	41.03712:35 43.01708:227 43.0548:41 43.98548:8 60.04487:101 60.98853:12 67.92142:4 84.08163:8 102.09514:20 102.12773:8	46664	41968	50335
41	14.3	858	102.09	w/o MS2:Betaine aldehyde cation	[M+H]+		0.333	FALSE	null	239.091	C12H14O5				3		FALSE	null	null	99.5	null	null	null	null	15.93	PosIDA-3	102.09032:18926 103.09367:1494 104.09703:153		108324	164534	695447
42	3.097	185.82	103.053	Phenylacetaldehyde	[M+H]+	similar chromatogram in higher mz_74; similar chromatogram in higher mz_274; found in higher mz's MsMs_197; found in higher mz's MsMs_74	1	TRUE	null	109.9	C8H11NO				2		FALSE	null	null	85.3	null	89.7	77.8	44.4	76.13	PosIDA-2	103.0532:8586 104.05655:1108 105.05991:5923	40.97065:24 43.02349:24 51.01997:24 51.02497:79 77.03465:12 77.03957:135 102.04268:12 102.04551:24 103.04953:48 103.05949:60	76518	72363	70520
43	1.31	78.6	104.051	w/o MS2:Benzamidine	[M+H]+	found in higher mz's MsMs_155	1	TRUE	null	773.534	C42H79O10P	Phosphatidylglycerols	AOWDUWHTDPWHIC-JSCMVKKRNA-N	CCCCCCCCCCCCCCCCCC(=O)OCC(COP(O)(=O)OCC(O)CO)OC(=O)CC\C=C/C\C=C/CCCCCCCCCC	3		FALSE	null	null	99.2	null	null	null	null	138.35	PosIDA-1	104.05074:4280 105.05409:979 106.05745:846	44.04684:36 45.98594:48 56.05046:48 58.06518:36 60.08068:24 61.01037:351 86.00459:10 104.1085:36	42354	41505	41488
44	1.034	62.04	104.107	Choline cation	[M+H]+		1	TRUE	null	281.248	C18H32O2				2	2	FALSE	null	null	95.4	null	91.3	92.6	100	2758.11	PosIDA-3	104.10641:82890 105.10976:8917 106.11312:579	42.034:819 43.018:367 43.04284:203 44.04968:6628 45.03333:6744 45.04368:430 45.05686:2016 45.40583:36 56.04737:104 57.89012:36 58.06524:7768 59.073:1030 59.90369:48 60.08074:14598 60.42036:24 71.07071:12 86.09313:12 103.7926:90 104.10716:20087 104.57128:24	600014	614248	601889
45	0.941	56.46	109.027	w/o MS2:Maltol	[M+H]+	found in higher mz's MsMs_332; found in higher mz's MsMs_377; found in higher mz's MsMs_310	1	TRUE	null	444.239	C41H80O16P2				2		FALSE	null	null	69.7	null	null	null	null	16.48	PosIDA-3	109.02653:2102 110.02988:284 111.03324:527	53.03894:83 67.05734:24 81.03761:36	15336	16656	17060
46	4.227	253.62	109.038	w/o MS2:5-Methylcytosine	[M+H]+	found in higher mz's MsMs_84	0.667	TRUE	null	206.139	C9H19NO4				3		FALSE	null	null	99.2	null	null	null	null	12.46	PosIDA-2	109.03831:1113 110.04166:919 111.04502:778	41.03983:24 53.0359:12 55.05651:10 77.03716:10 91.0512:12 109.07442:12	6864	7445	7080
47	2.219	133.14	110.022	Unknown	[M+H]+	similar chromatogram in higher mz_76; similar chromatogram in higher mz_83; found in higher mz's MsMs_83	1	TRUE	null	null	null	null	null	null	4		FALSE	null	null	null	null	null	null	null	9.51	PosIDA-1	110.02155:1508 111.0249:121 112.02826:20	42.03305:8 54.03214:4 55.0606:4 60.98409:12 67.04123:8 67.05615:4 68.98648:16 80.04457:4 92.33351:3 95.05373:4	14565	13677	13021
48	4.227	253.62	110.023	w/o MS2:Pyrrole-2-carboxylic acid	[M+H]+	found in higher mz's MsMs_84; found in higher mz's MsMs_335	1	TRUE	null	434.4	C37H70NO8P				2		FALSE	null	null	77.8	null	null	null	null	16.26	PosIDA-2	110.02306:2582 111.02641:260 112.02977:43	60.99069:12 66.02436:12 67.04586:10 75.00013:10 110.06226:12	16802	17138	16460
49	1.627	97.62	110.033	w/o MS2:5-Aminoimidazole-4-carboxamide	[M+H]+	similar chromatogram in higher mz_551	1	TRUE	null	179.048	C5H10N2O3S				2		FALSE	null	null	72.7	null	null	null	null	30.07	PosIDA-1	110.03313:4701 111.03648:674 112.03984:1465	55.02107:10 60.98737:12 68.98299:12 80.04708:10 110.00924:12	37878	37797	36714
50	1.049	62.94	110.07	w/o MS2:Histamine	[M+H]+	similar chromatogram in higher mz_171; found in higher mz's MsMs_171; found in higher mz's MsMs_314; similar chromatogram in higher mz_397; similar chromatogram in higher mz_192; similar chromatogram in higher mz_263; similar chromatogram in higher mz_451; found in higher mz's MsMs_288	1	TRUE	null	168.102	C9H13NO2				3		FALSE	null	null	97.7	null	null	null	null	91.05	PosIDA-2	110.07027:14283 111.07362:1498 112.07698:583	55.04195:36 56.04949:196 65.04129:12 66.03125:36 69.04366:24 81.04651:48 82.05331:36 83.0612:160 89.00079:10 93.04921:102 110.0697:125	136416	144298	137946
51	13.104	786.24	111.116	w/o MS2:3-Cyclopentyl-1-propanol	[M+H]+		1	FALSE	null	235.978	C7H6ClNO4S				3		FALSE	null	null	99.3	null	null	null	null	17.79	PosIDA-1	111.11562:4760 112.11897:6591 113.12233:2698		67711	67072	57236
52	1.55	93	112.049	w/o MS2:Cytosine	[M+H]+	found in higher mz's MsMs_339; found in higher mz's MsMs_865	1	TRUE	null	523.159	C9H12FN3O5				2		FALSE	null	null	68.4	null	null	null	null	169.8	PosIDA-1	112.04861:8595 113.05196:974 114.05532:108	40.02017:60 41.03972:67 42.03662:48 51.00885:12 52.01838:48 67.04458:24 68.04961:100 69.04581:48 78.0372:10 83.05842:36 95.02625:325 95.06043:449 96.83795:10 112.05272:142	65043	60314	63236
53	1.08	64.8	112.049	w/o MS2:Isocytosine	[M+H]+	found in higher mz's MsMs_502	0.667	FALSE	null	268.075	C11H13N3O3S				3		FALSE	null	null	98.8	null	null	null	null	53.46	PosIDA-2	112.04897:2536 113.05232:370 114.05568:832		30425	30281	29825
54	1.31	78.6	112.086	w/o MS2:Histamine	[M+H]+	similar chromatogram in higher mz_155	1	TRUE	null	122.006	C6H6N2S				3		FALSE	null	null	99.4	null	null	null	null	264.54	PosIDA-2	112.08582:13243 113.08917:1092 114.09253:1800	41.03886:1148 42.03303:90 54.03521:161 56.05148:77 67.0343:6 67.04119:93 67.84044:18 68.04967:1457 69.0447:18 78.03231:12 81.04384:131 82.05189:286 83.06105:412 94.77223:30 95.06052:6324 95.59725:18 97.72881:12 112.08696:486	151536	154009	146197
55	1.812	108.72	113.034	Uracil	[M+H]+	similar chromatogram in higher mz_903; found in higher mz's MsMs_343	1	TRUE	null	394.197	C19H27N3O6	Oligopeptides	FVGOGEGGQLNZGH-UHFFFAOYNA-N	O=C(O)CCC(N)C(O)=NC(C(O)=NC(C(=O)O)CC=1C=CC=CC1)C(C)C	2		FALSE	null	null	88.9	null	78.9	90.3	85.7	320	PosIDA-3	113.03329:21032 114.03664:1891 115.04:535	40.01842:159 41.03975:24 42.03574:93 43.01884:109 44.01331:24 53.0021:36 65.04341:12 68.01379:48 70.02932:501 95.01947:12 96.00763:321 113.03467:409	153635	151039	154266
56	12.679	760.74	113.107	w/o MS2:Mevalonic acid	[M+H]+		0.667	FALSE	null	748.529	C43H76NO7P	1-alkyl,2-acylglycerophosphoethanolamines	JJMPYAHUHHQAJB-YKPVOZFUNA-N	CCCCCCCCCCCCCCCCOCC(COP(O)(=O)OCCN)OC(=O)CC\C=C/C\C=C/C\C=C/C\C=C/C\C=C/C\C=C/CC	3		FALSE	null	null	80.2	null	null	null	null	24.9	PosIDA-3	113.10664:2917 114.10999:822 115.11335:613		49623	57594	46724
57	13.302	798.12	113.13	w/o MS2:1-Octanol	[M+H]+		1	TRUE	null	271.06	C15H10O5				2		FALSE	null	null	60.8	null	null	null	null	47.07	PosIDA-1	113.1307:3259 114.13405:575 115.13741:161	41.03716:79 42.03312:847 43.05299:60 44.04971:60 53.0441:24 55.05238:36 56.04951:36 69.04485:24 70.06354:24 84.07657:75 84.08428:824 96.07935:36 113.11699:36	43655	47874	44227
58	5.529	331.74	113.744	Unknown	[M+H]+	found in higher mz's MsMs_59	1	TRUE	null	null	null	null	null	null	4		FALSE	null	null	null	null	null	null	null	201.59	PosIDA-1	113.74569:1745 114.74904:614 115.7524:225	40.91769:65 41.00116:34 41.01104:4 41.02541:6 41.03888:9106 41.18635:2 41.21155:4 41.23496:4 41.25478:4 41.2809:5 41.28991:4 41.32236:4 41.33228:4 41.34129:5 41.36564:5 41.37917:4 41.3927:4 41.40263:4 41.55979:4 41.59777:2 41.65567:2 41.68283:4 41.70909:4 41.90949:4 41.99851:6 42.01032:41 42.03396:627 42.33271:2 42.73971:2 42.8902:6 42.92603:20 42.94532:2 43.00416:39 43.01796:485 43.03176:11 43.0…	10954	11300	9936
59	5.529	331.74	114.09	6-Aminocaproic acid	[M+H]+		1	TRUE	null	303.102	C20H14O3				2		FALSE	null	null	83.7	null	68.4	86.8	76.9	2395.67	PosIDA-2	114.0901:356804 115.09345:47482 116.09681:3162	40.91861:42 41.00208:30 41.03891:6299 41.90952:12 42.00944:67 42.03398:377 42.92421:12 43.00787:24 43.01706:377 43.05478:2758 43.88228:131 44.01337:17681 44.04687:18 46.02877:163 50.01427:18 51.02298:158 51.99321:18 53.00217:24 53.03893:436 53.99816:24 54.0095:24 54.03424:170 55.01694:1310 55.03255:58 55.03983:88 55.0544:3241 56.05155:76 57.03223:12 58.06522:30 59.03526:24 60.04702:12 65.03672:36…	2332824	2356910	2161500
60	6.183	370.98	114.09	w/o MS2:N-Acetylputrescine	[M+H]+		1	FALSE	null	468.934	C7H6ClNO4S				3		FALSE	null	null	99.6	null	null	null	null	13.07	PosIDA-2	114.09037:4382 115.09372:353 116.09708:201		43157	41713	37051
61	6.012	360.72	115.052	w/o MS2:.beta.-Cyano-L-alanine	[M+H]+	found in higher mz's MsMs_96; found in higher mz's MsMs_130; similar chromatogram in higher mz_185; found in higher mz's MsMs_185; similar chromatogram in higher mz_128	1	TRUE	null	247.001	C12H19O2PS3				2		FALSE	null	null	63.7	null	null	null	null	22.86	PosIDA-2	115.05241:2663 116.05576:684 117.05912:4863	41.03895:66 43.05207:24 45.03336:85 55.05342:62 57.03441:18 59.04934:24 69.06933:12 73.06963:12 89.03523:6 98.1815:5 115.05675:34	23679	22195	21578
62	8.269	496.14	115.054	w/o MS2:trans-Cinnamaldehyde	[M+H]+	similar chromatogram in higher mz_214; found in higher mz's MsMs_214; similar chromatogram in higher mz_320; similar chromatogram in higher mz_835; similar chromatogram in higher mz_411; similar chromatogram in higher mz_461; similar chromatogram in higher mz_188; similar chromatogram in higher mz_580; found in higher mz's MsMs_213; similar chromatogram in higher mz_319; found in higher mz's MsMs…	1	TRUE	null	772.585	C43H82NO8P				2		FALSE	null	null	71.8	null	null	null	null	21.09	PosIDA-3	115.05362:2494 116.05697:847 117.06033:1215	41.03975:36 43.05749:60 45.03608:48 55.03352:12 55.05537:36 57.07241:12 59.05243:48 63.02466:24 69.06683:12 73.06824:10 89.03369:12 89.03898:48 115.05495:71	17291	20701	19713
63	1.011	60.66	116.068	w/o MS2:L-Proline	[M+H]+	found in higher mz's MsMs_220	1	TRUE	null	333.207	C20H30O4				2		FALSE	null	null	63.2	null	null	null	null	10.76	PosIDA-1	116.06839:2187 117.07174:267 118.0751:2687	41.03789:24 54.01759:10 56.96536:36 70.06678:48 77.04059:10 79.05503:12 81.07274:36	36057	41813	35145
64	12.665	759.9	116.104	w/o MS2:4-Amidinophenylmethanesulfonyl fluoride	[M+H]+		1	TRUE	null	728.56	C41H80NO7P	1-alkyl,2-acylglycerophosphoethanolamines	RFXWTAVLHHOPPS-JSCMVKKRNA-N	CCCCCCCCCCCCCCCCCCOCC(COP(O)(=O)OCCN)OC(=O)CC\C=C/C\C=C/CCCCCCCCCC	3		FALSE	null	null	90.4	null	null	null	null	7.47	PosIDA-3	116.10448:2908 117.10783:339 118.11119:51	41.03889:36 42.03487:72 43.01612:24 44.04871:24 45.03423:36 53.04095:12 55.05229:48 57.06821:24 58.06625:24 74.05579:12 79.05148:12 84.08672:12 87.08089:24	56824	58203	39464
65	8.269	496.14	116.105	Unknown	[M+H]+	found in higher mz's MsMs_612; found in higher mz's MsMs_101	1	FALSE	null	null	null	null	null	null	4		FALSE	null	null	null	null	null	null	null	6.98	PosIDA-2	116.10474:1769 117.10809:176 118.11145:27		21309	29043	18409
66	13.446	806.76	116.106	Unknown	[M+H]+	similar chromatogram in higher mz_102; similar chromatogram in higher mz_143; similar chromatogram in higher mz_215	1	FALSE	null	null	null	null	null	null	4		FALSE	null	null	null	null	null	null	null	8.68	PosIDA-1	116.10588:3276 117.10923:270 118.11259:43		94355	77662	96513
67	4.227	253.62	117.052	w/o MS2:Levulinic acid	[M+H]+		1	FALSE	3.98	415.104	C21H20O9	Flavonoid-3-O-glycosides	RXAXTTGJEMODPY-UHFFFAOYNA-N	O=C3C(OC2OC(CO)C(O)C(O)C2(OC1OCC(O)C(O)C1(O)))=C(OC4=CC(O)=CC(O)=C34)C5=CC=C(O)C=C5	3		FALSE	null	null	97.7	null	null	null	null	16.13	PosIDA-2	117.05243:1198 118.05578:122 119.05914:32		7469	8037	7586
68	6.02	361.2	117.068	w/o MS2:DL-2,4-Diaminobutyric acid	[M+H]+	found in higher mz's MsMs_96; found in higher mz's MsMs_130; found in higher mz's MsMs_185	1	TRUE	null	99.1168	C7H16O				2		FALSE	null	null	67.8	null	null	null	null	37.66	PosIDA-2	117.06767:2780 118.07102:1161 119.07438:2178	41.03985:18 43.01803:24 51.02103:6 61.02691:12 73.08761:5 81.0718:12 89.0392:12 99.07841:6 117.05698:18	24084	24037	23612
69	0.995	59.7	118.085	w/o MS2:L-Valine	[M+H]+	similar chromatogram in higher mz_189; similar chromatogram in higher mz_608; similar chromatogram in higher mz_868	1	FALSE	null	322.993	C6H14O12P2				3		FALSE	null	null	99	null	null	null	null	37.94	PosIDA-3	118.08491:1763 119.08826:2399 120.09162:2396		13890	13442	14603
70	2.417	145.02	119.033	w/o MS2:D-Erythronic acid .gamma.-lactone	[M+H]+	similar chromatogram in higher mz_112; found in higher mz's MsMs_112	1	TRUE	null	90.1	C8H13NO2S				2		FALSE	null	null	70.2	null	null	null	null	40.43	PosIDA-3	119.03316:8070 120.03651:641 121.03987:3311	43.01806:8 45.0174:8 55.05553:8 59.04937:8 60.98861:12 65.0097:4 65.03796:8 68.98199:3 77.03356:4 79.05539:4 83.014:8 91.05531:35 96.98602:3 101.89983:8 119.03321:20	86364	84206	84898
71	1.535	92.1	119.048	w/o MS2:Phenylacetic acid	[M+H]+	similar chromatogram in higher mz_78; found in higher mz's MsMs_137; similar chromatogram in higher mz_196; found in higher mz's MsMs_196; found in higher mz's MsMs_236; found in higher mz's MsMs_113	1	TRUE	null	128.026	C6H6ClN				3		FALSE	null	null	99.4	null	null	null	null	26.28	PosIDA-1	119.04803:5203 120.05138:869 121.05474:2232	45.01348:12 59.98826:12 60.98293:12 65.03775:76 75.02066:24 91.04966:12 91.05635:124 115.05342:10 119.04813:24	40005	38072	38572
72	11.727	703.62	119.085	.beta.-Methylphenethylamine	[M+H]+	found in higher mz's MsMs_963; found in higher mz's MsMs_866; found in higher mz's MsMs_829; found in higher mz's MsMs_783; found in higher mz's MsMs_746; found in higher mz's MsMs_424; similar chromatogram in higher mz_1010; similar chromatogram in higher mz_907; similar chromatogram in higher mz_1042	1	TRUE	null	343.2	C22H34O5				2		FALSE	null	null	86.7	null	68.6	87.7	100	51.85	PosIDA-3	119.08491:12897 120.08826:5039 121.09162:6071	45.01821:10 59.04813:12 91.05105:12 91.05506:36 104.0598:12 119.08797:36	117051	113138	119412
73	6.546	392.76	120.054	w/o MS2:S-(2-Aminoethyl)isothiourea	[M+H]+		0.333	TRUE	null	149.096	C10H15NO				2		FALSE	null	null	77.8	null	null	null	null	7.83	PosIDA-3	120.05421:1472 121.05756:556 122.06092:179	43.01713:5 44.04973:10 51.02206:5 60.98421:5 65.03682:119 77.03846:10 92.04824:29 103.05396:7 105.06386:7 105.06673:33 120.05743:216	9968	9459	9641
74	3.097	185.82	120.08	2-Amino-1-phenylethanol	[M+H]+	found in higher mz's MsMs_197; found in higher mz's MsMs_704	1	TRUE	null	327.135	C18H22N2O5				2		FALSE	null	null	96.8	null	95.3	97.1	92.3	430.8	PosIDA-3	120.07991:65894 121.08326:11605 122.08662:717	42.03575:79 43.04277:18 50.01322:12 51.02291:441 53.03784:49 60.98404:18 63.02465:5 65.03664:132 76.80947:18 77.03947:1818 78.036:12 79.05265:12 91.0537:833 92.05067:18 93.07066:153 101.03922:12 102.0468:98 102.74072:24 103.05367:2322 104.05833:24 105.07075:74 107.60286:5 118.06479:118 119.07109:34 120.08013:1118	579402	563575	543681
75	12.673	760.38	121.027	Benzoic acid, 4-hydroxy-	[M+H]+	found in higher mz's MsMs_280; found in higher mz's MsMs_150	1	TRUE	null	378.1	C15H17N7O5S3				2		FALSE	null	null	83.4	null	58.5	88.5	100	11.5	PosIDA-2	121.02722:3669 122.03057:650 123.03393:85	43.05577:24 60.86162:12 61.04227:24 65.03908:89 66.03472:24 77.04462:12 93.03846:36 93.06822:24 105.07537:36 121.03207:60	33870	33817	32861
76	2.234	134.04	121.05	Purine	[M+H]+		1	TRUE	null	255.065	C15H10O4				2	2	FALSE	null	null	95.7	null	92.2	92.9	100	195.48	PosIDA-2	121.05023:57726 122.05358:5864 123.05694:578	40.01848:849 40.96886:30 42.03489:18 43.02902:167 51.02298:18 52.01849:693 53.01545:18 55.05024:6 66.0312:12 67.02864:3270 69.04594:18 77.0125:59 77.03958:160 79.05027:24 84.9596:12 91.05382:48 93.04238:40 93.75526:48 94.04063:5129 95.53567:12 100.02698:5 103.05382:30 105.0709:85 119.09269:12 121.0504:11133 121.10132:18	544043	531306	500279
77	2.835	170.1	122.68	Unknown	[M+H]+		1	FALSE	null	null	null	null	null	null	4		FALSE	null	null	null	null	null	null	null	198.66	PosIDA-3	122.6805:1757 123.68385:479 124.68721:103		14106	13306	13301
78	1.535	92.1	123.044	4-Hydroxybenzaldehyde	[M+H]+	found in higher mz's MsMs_236; found in higher mz's MsMs_196	1	TRUE	null	321.2	C20H34O4				2		FALSE	null	null	84.1	null	70.6	94.3	60	74.23	PosIDA-2	123.04256:7255 124.04591:1038 125.04927:213	41.59963:10 50.01233:12 51.02102:36 65.03338:12 67.0551:12 68.98192:24 77.03841:169 79.05158:12 81.06924:24 91.05389:10 95.04976:96 123.05373:36	62108	61471	60280
79	1.888	113.28	123.053	Unknown	[M+H]+	similar chromatogram in higher mz_944	1	TRUE	null	null	null	null	null	null	4		FALSE	null	null	null	null	null	null	null	36.23	PosIDA-1	123.05314:3587 124.05649:403 125.05985:206	43.05377:12 53.03473:12 68.98055:10 77.03449:24 78.03347:24 80.04947:48 88.00317:10 95.06042:12 108.06297:24 123.05492:24 123.09226:24	31728	34416	30056
80	2.835	170.1	123.055	Isonicotinamide	[M+H]+		1	TRUE	null	121.065	C8H11NO				2	2	FALSE	null	null	89.7	null	86.5	79	90	4138.68	PosIDA-2	123.05479:329812 124.05814:35076 125.0615:2469	41.00294:24 41.03797:188 43.01794:24 44.01239:687 50.01522:321 50.87379:24 51.02293:2478 52.01844:1045 52.03058:278 53.03888:15935 53.99811:48 54.03419:147 54.33355:24 68.04968:190 71.0588:36 77.79837:74 78.03356:19579 79.04147:872 79.80508:189 80.04957:64930 80.35727:24 80.60511:36 81.04133:36 81.08426:36 90.31657:10 93.045:24 95.0578:420 96.04478:3457 96.61462:24 105.04493:519 106.02746:2726 11…	2768112	2721659	2904469
81	5.474	328.44	124.049	w/o MS2:Pyrazinamide	[M+H]+	found in higher mz's MsMs_235; similar chromatogram in higher mz_299; similar chromatogram in higher mz_233; found in higher mz's MsMs_233	1	TRUE	null	898.612	C47H79N9O8	NA	IMJOKVCCAPZUEO-UHFFFAOYNA-N	CCC(C)C1NC(=O)C(C)NC(=O)C(NC(=O)C(CCCCN)NC(=O)C(NC(=O)C(NC(=O)C(CC2=CC=CC=C2)NC(=O)C(CC(C)C)NC1=O)C(C)CC)C(C)C)C(C)CC	3		FALSE	null	null	99.4	null	null	null	null	47.07	PosIDA-3	124.04938:6988 125.05273:694 126.05609:91	74.96258:10 80.04848:12 88.98363:10 124.117:24	45632	49320	43462
82	0.941	56.46	127.038	w/o MS2:Propanoic acid, 2-hydroxy-2-methyl-	[M+H]+	found in higher mz's MsMs_332; found in higher mz's MsMs_377; found in higher mz's MsMs_310	1	TRUE	null	124.076	C7H9NO				3		FALSE	null	null	99.3	null	null	null	null	55.97	PosIDA-3	127.03774:4754 128.04109:1085 129.04445:685	43.01431:12 43.01799:88 53.042:12 69.06692:12 77.03958:10 81.06539:24 83.05347:10	47123	48670	47808
83	2.219	133.14	127.049	Unknown	[M+H]+		1	TRUE	null	null	null	null	null	null	4		FALSE	null	null	null	null	null	null	100	337.2	PosIDA-1	127.04884:28677 128.05219:2259 129.05555:864	41.03798:36 43.01703:46 44.01334:189 54.03317:1321 55.05332:9 56.04836:636 67.05156:12 79.05396:12 81.04514:120 82.02906:467 84.04299:681 85.05006:9 109.03914:722 110.02248:2082 125.03558:3 127.04926:2792	268084	258130	240144
84	4.227	253.62	127.049	6-Methyluracil	[M+H]+	found in higher mz's MsMs_858; found in higher mz's MsMs_446; found in higher mz's MsMs_335	1	TRUE	null	122.06	C7H7NO				2		FALSE	null	null	83.9	null	67	78.1	100	814.39	PosIDA-2	127.04889:67260 128.05224:8637 129.0556:1340	41.03983:36 43.01801:36 44.01339:195 54.03427:1607 56.04843:929 79.05779:12 81.04398:84 82.02789:414 83.06119:24 84.0418:767 109.03927:1121 110.02408:2950 126.66242:24 127.0494:4264	439333	450565	442184
85	13.462	807.72	127.121	Unknown	[M+H]+		1	TRUE	null	null	null	null	null	null	4		FALSE	null	null	null	null	null	null	null	53.69	PosIDA-2	127.12168:6450 128.12503:2119 129.12839:568	41.03885:128 42.03484:812 43.01885:36 44.0496:24 55.05225:24 56.04833:89 58.06621:48 67.03774:12 67.05382:48 68.04851:168 70.06219:36 72.08144:48 77.03825:24 82.06458:36 83.0751:36 84.08022:75 98.09652:1008 127.13296:24	198530	224454	183995
86	14.146	848.76	127.121	Unknown	[M+H]+		0.333	FALSE	null	null	null	null	null	null	4		FALSE	null	null	null	null	null	null	null	55.75	PosIDA-1	127.12145:4613 128.1248:2365 129.12816:1186		135744	89473	60610
87	12.673	760.38	127.121	Unknown	[M+H]+		1	TRUE	null	null	null	null	null	null	4		FALSE	null	null	null	null	null	null	null	24.96	PosIDA-3	127.12146:3134 128.12481:1621 129.12817:860	42.03305:289 43.01521:24 55.04189:12 55.05437:124 58.06519:36 67.05272:24 70.06107:24 70.06577:36 72.08149:24 82.06336:24 84.07899:164 98.09658:366 110.10193:24	55113	56291	35786
88	0.964	57.84	128.953	Unknown	[M+H]+	similar chromatogram in higher mz_90; similar chromatogram in higher mz_154; similar chromatogram in higher mz_99; similar chromatogram in higher mz_221; similar chromatogram in higher mz_267; similar chromatogram in higher mz_483; similar chromatogram in higher mz_410	1	FALSE	null	null	null	null	null	null	4		FALSE	null	null	null	null	null	null	null	24.01	PosIDA-3	128.95258:2509 129.95593:63 130.95929:186		15541	15113	16407
89	13.446	806.76	129.053	w/o MS2:Adipic acid	[M+H]+	found in higher mz's MsMs_660; similar chromatogram in higher mz_374; found in higher mz's MsMs_374; similar chromatogram in higher mz_738; similar chromatogram in higher mz_138; similar chromatogram in higher mz_328; similar chromatogram in higher mz_486; similar chromatogram in higher mz_753	1	TRUE	null	113.035	C4H4N2O2				3		FALSE	null	null	98.3	null	null	null	null	189.35	PosIDA-1	129.05276:20190 130.05611:2248 131.05947:305	41.03704:24 44.05052:36 55.05327:12 69.06797:12 73.06463:24 86.06435:10 97.07826:12 129.12032:24	231001	246386	245610
90	0.964	57.84	130.049	D-Pyroglutamic acid	[M+H]+		1	TRUE	null	365.269	C22H38O5				2		FALSE	null	null	93.8	null	85.9	93.8	100	20.88	PosIDA-2	130.04903:3815 131.05238:415 132.05574:8077	41.03891:77 44.01151:36 56.04945:190 84.04433:428 84.08163:164 112.12125:10 130.04643:24	34324	35432	36761
91	8.269	496.14	130.064	Unknown	[M+H]+	found in higher mz's MsMs_214; found in higher mz's MsMs_320; found in higher mz's MsMs_294; found in higher mz's MsMs_178; found in higher mz's MsMs_251; found in higher mz's MsMs_213; found in higher mz's MsMs_188	1	FALSE	null	null	null	null	null	null	4		FALSE	null	null	null	null	null	null	null	59.87	PosIDA-2	130.06352:11400 131.06687:8025 132.07023:1071		75178	85193	83287
92	13.446	806.76	130.121	w/o MS2:N-n-Butylpropionamide	[M+H]+	found in higher mz's MsMs_328	1	FALSE	null	342.131	C17H21NO5	Anisoles	WAGZSQGCUXDBOA-UHFFFAOYSA-N	COC1=CC(CCC(=O)N2CCC=CC2=O)=CC(OC)=C1OC	3		FALSE	null	null	98.8	null	null	null	null	8.34	PosIDA-3	130.12108:2926 131.12443:609 132.12779:94		101828	84061	75934
93	6.61	396.6	130.158	w/o MS2:Diisopropylethylamine	[M+H]+		1	TRUE	null	110.06	C7H8NO2				2		FALSE	null	null	74.5	null	null	null	null	161.25	PosIDA-1	130.1577:29506 131.16105:4566 132.16441:265	40.91771:6 41.00208:15 41.03801:1651 42.01035:6 42.02125:2 43.01798:5 43.05478:2 45.03331:4 51.99725:2 53.00115:7 53.01442:14 53.9961:12 54.00949:5 55.05336:22 56.04945:6 56.89886:6 57.0693:1245 58.06414:12 59.04711:2 67.0562:2 69.07041:2 70.94306:4 72.08272:7 74.08961:4 74.09565:487 77.04081:5 78.37468:1 84.04047:5 84.07904:4 88.07572:5 95.08797:2 99.0462:1 103.0524:4 128.05188:2 130.06561:42 13…	264855	250293	243231
94	9.644	578.64	131.084	1,2,3,4-Tetrahydro-1-naphthylamine	[M+H]+		1	TRUE	null	385.237	C24H34O5				2		FALSE	null	null	86.9	null	77.3	83.1	87.5	23.15	PosIDA-2	131.08405:2345 132.0874:588 133.09076:287	41.03622:8 43.01799:12 55.05336:4 63.02475:3 65.03674:16 73.05037:12 89.94521:4 91.05383:175 99.0825:4 115.05362:79 116.06366:39 128.063:12 129.07591:8 131.08481:20	15556	16053	15186
95	1.034	62.04	132.077	Creatine	[M+H]+	found in higher mz's MsMs_381; found in higher mz's MsMs_353	1	TRUE	null	287.055	C15H10O6				2	2	FALSE	null	null	95.7	null	91.2	93.7	100	3020.72	PosIDA-3	132.07642:128400 133.07977:11993 134.08313:1335	40.02027:24 41.03893:299 42.02127:59 42.03309:727 42.90127:48 43.02904:10794 43.68465:24 43.91854:160 44.01245:60 44.03572:41 44.04968:58609 44.25655:36 44.38632:60 44.79555:36 47.01398:36 56.04737:24 58.05241:213 58.06417:142 59.01266:36 68.05093:634 69.04363:170 72.05537:361 86.06061:1060 87.05479:1021 87.08097:216 89.78038:48 90.05432:17027 114.06448:257 115.04762:179 127.89645:10 132.07735:62…	970538	1001295	981493
96	6.012	360.72	132.08	S(-)-Cathinone	[M+H]+		1	TRUE	null	237.091	C16H14O3				2		FALSE	null	null	80.7	null	68.7	73.1	75	23.26	PosIDA-2	132.07988:1552 133.08323:383 134.08659:60	43.05299:18 44.05064:12 70.06589:12 72.93662:12 89.04185:24 90.04641:24 93.06142:12 103.05109:6 103.05536:18 105.07246:18 115.05524:56 117.05698:78 130.06096:18 131.07048:18 132.08069:93	13643	12933	14037
97	1.581	94.86	132.101	L-Isoleucine	[M+H]+	similar chromatogram in higher mz_396; similar chromatogram in higher mz_163	1	TRUE	null	311.294	C20H38O2				2	2	FALSE	null	null	95	null	93.2	93.6	90.9	202.89	PosIDA-1	132.1006:14226 133.10395:2180 134.10731:248	41.03888:1684 42.03395:129 43.05475:72 44.0487:2541 45.03328:113 55.05228:36 56.04941:443 57.05761:540 58.06518:97 60.04372:10 69.06921:1763 70.06459:24 71.07182:24 73.0647:48 85.83171:12 86.09695:4591 90.05423:36 132.10463:24	110911	103225	109893
98	1.31	78.6	133.031	L-Methionine	[M+H]+	similar chromatogram in higher mz_155; similar chromatogram in higher mz_586; found in higher mz's MsMs_155; similar chromatogram in higher mz_242	1	TRUE	null	283.3	C21H40O4				2		FALSE	null	null	86.5	null	87.8	85.1	46.9	71.53	PosIDA-2	133.03052:10388 134.03387:838 135.03723:662	44.97869:295 45.03138:18 46.99468:47 47.21317:6 51.02292:6 53.03989:75 57.03322:30 57.9893:6 58.99533:95 61.01034:347 70.05751:6 70.06455:46 70.99733:74 72.00408:144 73.04428:30 74.99155:30 77.00011:6 85.00993:39 85.02933:30 87.0272:234 88.02168:18 105.03485:18 133.03461:60	99797	103090	96647
99	0.964	57.84	134.017	Unknown	[M+H]+		1	FALSE	null	null	null	null	null	null	4		FALSE	null	null	null	null	null	null	null	6.34	PosIDA-3	134.01743:1739 135.02078:483 136.02414:3029		13398	13943	13909
100	8.808	528.48	134.095	w/o MS2:2-Methylindoline	[M+H]+	found in higher mz's MsMs_165	1	TRUE	null	794.567	C43H82NO8P				2		FALSE	null	null	74.6	null	null	null	null	32.15	PosIDA-1	134.09531:8938 135.09866:1650 136.10202:473	43.02163:32 44.04869:40 45.03327:8 55.05227:4 55.05435:16 57.07137:12 61.02679:26 63.45739:3 65.03893:35 74.04973:3 77.03583:8 87.07825:12 91.05375:193 92.06283:16 93.05718:12 95.76189:3 102.09077:8 106.06213:16 115.052:16 117.05979:12 118.06334:160 119.07117:104 132.08205:12 134.09622:234	63677	60770	55576
101	8.269	496.14	134.115	Unknown	[M+H]+	similar chromatogram in higher mz_214; similar chromatogram in higher mz_294; similar chromatogram in higher mz_178; similar chromatogram in higher mz_251; similar chromatogram in higher mz_213; similar chromatogram in higher mz_121; similar chromatogram in higher mz_142; similar chromatogram in higher mz_188; similar chromatogram in higher mz_319; similar chromatogram in higher mz_400; similar c…	1	TRUE	null	null	null	null	null	null	4		FALSE	null	null	null	null	null	null	null	8.86	PosIDA-2	134.11511:2617 135.11846:1741 136.12182:568	43.019:24 61.02808:12 74.04634:12 87.07853:12 105.95418:10 116.10925:24 134.06255:12	25554	24811	27041
102	13.446	806.76	134.116	Unknown	[M+H]+		1	TRUE	null	null	null	null	null	null	4		FALSE	null	null	null	null	null	null	null	20.57	PosIDA-2	134.11635:6791 135.1197:2147 136.12306:2276	43.02069:24 44.04867:24 55.05121:12 55.05329:60 64.92586:24 87.08083:72	158599	159025	153628
103	14.165	849.9	134.116	Unknown	[M+H]+		1	FALSE	null	null	null	null	null	null	4		FALSE	null	null	null	null	null	null	null	10.51	PosIDA-1	134.11642:3046 135.11977:1825 136.12313:2503		72591	85629	77136
104	12.673	760.38	134.116	w/o MS2:Benzene, butyl-	[M+H]+		1	TRUE	null	102.055	C4H9NO3				3		FALSE	null	null	83.3	null	null	null	null	10.78	PosIDA-2	134.11504:4130 135.11839:1954 136.12175:1857	43.01887:36 44.05056:24 55.05124:12 55.05228:36 60.04589:36 84.09056:10 87.08088:48 134.0589:12	70686	74916	43867
105	9.724	583.44	134.116	Unknown	[M+H]+		1	FALSE	null	null	null	null	null	null	4		FALSE	null	null	null	null	null	null	null	5	PosIDA-2	134.11647:1896 135.11982:1407 136.12318:902		28591	19638	26213
106	3.006	180.36	135.029	w/o MS2:DL-Malic acid	[M+H]+	found in higher mz's MsMs_164; found in higher mz's MsMs_435; similar chromatogram in higher mz_164; similar chromatogram in higher mz_1021	1	TRUE	null	523.113	C9H11FN2O6				3		FALSE	null	null	99.9	null	null	null	null	28.19	PosIDA-2	135.02921:3724 136.03256:3401 137.03592:949	43.01701:12 45.03231:10 51.02191:12 57.03851:10 69.07382:10 77.03948:36 84.94011:12 84.96337:12 91.05103:24 103.05368:12 107.08562:10 117.0658:12	27254	28121	27367
107	11.727	703.62	135.08	w/o MS2:2-Phenylpropionaldehyde	[M+H]+	found in higher mz's MsMs_829; found in higher mz's MsMs_783; found in higher mz's MsMs_866	1	FALSE	null	103.04	C4H8O3	Alpha hydroxy acids and derivatives	BWLBGMIXKSTLSX-UHFFFAOYSA-N	O=C(O)C(O)(C)C	3		FALSE	null	null	99.6	null	null	null	null	16.12	PosIDA-3	135.07954:2386 136.08289:564 137.08625:179		15320	18176	19042
108	1.034	62.04	136.041	w/o MS2:4-Nitrobenzylamine	[M+H]+		0.333	TRUE	null	275.202	C18H28O2				2		FALSE	null	null	79	null	null	null	null	15.89	PosIDA-2	136.04138:3781 137.04473:393 138.04809:445	60.98737:12 65.03781:36 77.03831:36 106.07371:12 109.01132:204 120.07562:12 136.021:623	34019	35198	32878
109	3.98	238.8	136.061	w/o MS2:Adenine	[M+H]+	found in higher mz's MsMs_690; similar chromatogram in higher mz_356; similar chromatogram in higher mz_759	1	TRUE	null	349.237	C21H34O5				2		FALSE	null	null	69	null	null	null	null	9.94	PosIDA-2	136.06071:3277 137.06406:576 138.06742:177	60.98622:12 65.03776:60 68.9771:12 77.03455:12 77.03824:24 79.50091:10 109.00536:24 109.00829:212 136.01923:317	22318	25887	21368
110	6.723	403.38	136.061	Adenine	[M+H]+	similar chromatogram in higher mz_191; similar chromatogram in higher mz_585; found in higher mz's MsMs_533; found in higher mz's MsMs_475	1	TRUE	null	845.394	C43H58N4O12				2		FALSE	null	null	89.9	null	85.4	88	77.8	122.21	PosIDA-3	136.06125:35844 137.0646:4062 138.06796:244	55.02852:12 65.03801:60 68.98087:12 77.03976:48 79.0517:10 92.02814:48 94.04221:48 109.00578:78 119.02563:12 119.03481:206 136.02138:204 136.06555:282	291926	266755	273601
111	4.57	274.2	136.061	Unknown	[M+H]+	found in higher mz's MsMs_395	1	TRUE	null	null	null	null	null	null	4		FALSE	null	null	null	null	null	null	100	99.91	PosIDA-2	136.06097:30528 137.06432:3627 138.06768:220	40.0185:6 43.02996:2 45.03333:2 47.49503:1 51.023:17 55.02841:12 60.98743:4 63.03701:1 65.013:8 65.03788:60 67.02982:9 68.97956:10 77.03961:27 82.03804:6 89.03649:2 91.05252:14 92.02393:51 92.0616:4 94.04203:11 94.06787:4 106.06516:5 107.9991:5 109.0085:170 109.05389:9 119.03459:136 120.08036:5 136.02113:490 136.06203:273 136.11273:5	227627	228896	230405
112	2.424	145.44	136.061	Adenine	[M+H]+		1	TRUE	null	845.394	C43H58N4O12				2	2	FALSE	null	null	95.7	null	92.3	92.6	100	498.29	PosIDA-3	136.06114:152954 137.06449:14723 138.06785:638	40.01944:409 41.01473:8 43.00335:12 43.0291:164 43.99763:4 45.04563:20 47.01501:3 53.01248:20 53.99826:38 55.02848:472 56.94128:8 59.02782:3 60.9908:8 65.01308:1497 65.03683:98 66.02106:20 66.82912:8 67.02876:1268 68.03945:8 68.975:8 73.96547:4 77.01141:197 77.03725:20 79.05415:8 81.78938:8 82.03941:285 91.05264:16 91.7431:32 92.02405:4611 93.05336:8 93.75542:12 93.93067:8 94.04079:1300 95.10317:…	1593488	1546674	1565852
113	1.535	92.1	136.074	DL-Octopamine	[M+H]+	found in higher mz's MsMs_652; found in higher mz's MsMs_611; found in higher mz's MsMs_236	1	TRUE	null	516.156	C23H27N5O7S				2		FALSE	null	null	87.7	null	78.2	80.5	100	56.9	PosIDA-3	136.07367:17122 137.07702:2683 138.08038:302	45.03415:10 65.0377:228 77.03448:12 77.03693:137 81.07151:24 91.0536:1243 93.05433:36 94.04177:24 101.01093:12 107.04922:210 109.01405:241 109.0653:48 118.06315:36 119.04496:124 121.08714:10 136.02237:536 136.07635:117	128423	126825	129121
114	2.873	172.38	137.044	Unknown	[M+H]+	found in higher mz's MsMs_398	1	TRUE	null	null	null	null	null	null	4		FALSE	null	null	null	null	null	null	100	86.22	PosIDA-1	137.04402:42378 138.04737:4928 139.05073:1128	41.03888:548 43.01611:8 43.05383:108 51.02194:16 53.01133:12 53.0389:142 55.02939:439 55.05332:208 57.06926:39 65.01406:103 65.03894:45 66.04484:34 67.02859:132 67.05386:453 69.06804:54 77.04076:107 79.05396:599 80.8231:12 81.07039:1312 82.03922:244 83.02275:12 88.93321:4 88.94115:4 91.0551:80 92.02518:157 93.06937:116 94.03922:284 95.08517:595 97.63737:3 107.0886:16 109.10211:31 110.03572:721 11…	298001	298071	291233
115	1.604	96.24	137.046	Hypoxanthine	[M+H]+	adduct linked to 177_[M+Na]+	1	TRUE	null	396.253	C25H35NO4				2	2	FALSE	null	null	98.1	null	95.3	98.5	100	337.87	PosIDA-1	137.04558:166541 138.04893:18782 139.05229:1999	40.01754:456 41.03795:527 43.00321:12 43.02896:60 43.0538:188 53.01537:36 53.03682:119 55.02935:3803 55.05224:131 57.06922:48 60.98513:10 65.01289:457 65.03664:48 66.04707:36 67.02855:1093 67.05495:290 69.07149:36 77.01733:73 77.04071:98 79.05141:381 80.06083:24 81.07034:1524 81.79166:24 82.04044:2410 83.02396:220 91.04701:12 91.05504:91 92.02377:1736 93.00574:214 93.07202:104 93.75513:60 94.0391…	1275057	1186664	1240614
116	6.468	388.08	138.064	w/o MS2:6-Aminopyridine-3-carboxamide	[M+H]+	similar chromatogram in higher mz_256; found in higher mz's MsMs_256; similar chromatogram in higher mz_255	1	TRUE	null	608.089	C17H27N3O17P2	Pyrimidine nucleotide sugars	LFTYTUAZOPRMMI-UHFFFAOYNA-N	CC(=O)NC1C(O)C(O)C(CO)OC1OP(O)(=O)OP(O)(=O)OCC1OC(C(O)C1O)N1C=CC(=O)NC1=O	3		FALSE	null	null	97.2	null	null	null	null	36.57	PosIDA-2	138.06381:6412 139.06716:1078 140.07052:124	41.03613:12 41.03883:52 42.0339:22 42.043:10 43.0547:10 53.04087:7 54.04135:5 55.05429:12 67.05377:20 68.05772:12 77.03574:5 78.0434:7 79.05511:20 80.05576:47 81.06776:42 82.07342:88 91.05499:10 93.06655:10 94.06222:12 95.08642:27 96.08593:27 106.0649:5 108.07903:49 109.08733:7 111.00418:7 122.09234:12 122.09853:19 123.10162:5 136.10588:5 138.12567:66	37016	38766	34691
117	14.349	860.94	138.126	Unknown	[M+H]+		0.333	FALSE	null	null	null	null	null	null	4		FALSE	null	null	null	null	null	null	null	47.6	PosIDA-3	138.12631:13015 139.12966:4462 140.13302:6142		242523	253480	303830
118	14.835	890.1	139.001	w/o MS2:Moclobemide	[M+H]+		1	TRUE	null	786.529	C42H78NO10P	Phosphatidylserines	JTUPNPXBWXOEFZ-ZUELCTOONA-N	CCCCCCCCCCCCC\C=C/CCC(=O)OCC(COP(O)(=O)OCC(N)C(O)=O)OC(=O)CC\C=C/CCCCCCCCCCCCC	2		FALSE	null	null	61.6	null	null	null	null	20.42	PosIDA-3	139.00137:2709 140.00472:267 141.00808:113	40.02738:12 43.01709:36 55.01906:24 60.98635:36 66.02897:12 66.03352:48 68.99589:123 83.04713:12 93.04649:332 97.06465:24 104.00705:10 111.00741:24 121.03812:169 124.106:10 139.05217:48 139.11337:24	39054	36040	36061
119	12.673	760.38	140.118	Unknown	[M+H]+		1	FALSE	null	null	null	null	null	null	4		FALSE	null	null	null	null	null	null	null	38.18	PosIDA-3	140.11774:5848 141.12109:1015 142.12445:26211		111629	126150	114443
120	13.462	807.72	141.137	w/o MS2:Perazine	[M+H]+		1	FALSE	null	153.066	C7H8N2O2				3		FALSE	null	null	98.7	null	null	null	null	44.4	PosIDA-1	141.13698:3186 142.14033:5783 143.14369:2764		114011	72672	89666
121	8.269	496.14	142.064	w/o MS2:Dimetridazole	[M+H]+		1	FALSE	3.69	323.177	C20H24N2O2	Macroline alkaloids	RBALEJFQJCAPLN-UHFFFAOYNA-N	COC1=CC=C2C(NC3=C2CC2C(CO)C4CC3N2CC4=CC)=C1	3		FALSE	null	null	96.8	null	null	null	null	34.59	PosIDA-2	142.06364:1330 143.06699:11718 144.07035:5946		8684	9709	8484
122	8.276	496.56	142.12	Unknown	[M+H]+		1	FALSE	null	null	null	null	null	null	4		FALSE	null	null	null	null	null	null	null	7.3	PosIDA-2	142.12036:6589 143.12371:644 144.12707:349		124037	99817	64587
123	14.349	860.94	142.122	Unknown	[M+H]+		0.333	FALSE	null	null	null	null	null	null	4		FALSE	null	null	null	null	null	null	null	130.43	PosIDA-3	142.1217:26765 143.12505:2708 144.12841:603		637423	548859	684804
124	12.662	759.72	142.122	Unknown	[M+H]+	found in higher mz's MsMs_216	0.333	FALSE	null	null	null	null	null	null	4		FALSE	null	null	null	null	null	null	null	28.17	PosIDA-2	142.12195:23662 143.1253:2827 144.12866:823		394516	766958	403655
125	11.405	684.3	142.122	w/o MS2:Pregabalin	[M+H]+		0.333	FALSE	null	179.1	C18H34O4				3		FALSE	null	null	99.8	null	null	null	null	18.95	PosIDA-2	142.12198:17694 143.12533:1944 144.12869:483		495222	381647	175884
126	8.269	496.14	143.071	w/o MS2:3-Acetyl-3-methyldihydrofuran-2-one	[M+H]+	found in higher mz's MsMs_214; found in higher mz's MsMs_320; found in higher mz's MsMs_251; found in higher mz's MsMs_400; found in higher mz's MsMs_319; found in higher mz's MsMs_213	1	FALSE	null	92.0495	C6H8N2				3		FALSE	null	null	99.7	null	null	null	null	59.91	PosIDA-3	143.07106:6944 144.07441:4593 145.07777:786		48223	51856	53327
127	6.012	360.72	143.073	Unknown	[M+H]+	found in higher mz's MsMs_130; found in higher mz's MsMs_185	1	FALSE	null	null	null	null	null	null	4		FALSE	null	null	null	null	null	null	null	44.19	PosIDA-2	143.0731:5004 144.07645:332954 145.07981:38043		41155	41183	42653
128	6.012	360.72	143.64	Unknown	[M+H]+		1	FALSE	null	null	null	null	null	null	4		FALSE	null	null	null	null	null	null	null	176.09	PosIDA-1	143.64044:1129 144.64379:333 145.64715:60		9153	8649	9433
129	8.309	498.54	144.079	3-(2-Hydroxyethyl)indole	[M+H]+		0.667	TRUE	null	121.1	C20H33NO4				2		FALSE	null	null	93.8	null	85.9	94.6	100	18.95	PosIDA-1	144.0795:5012 145.08285:995 146.08621:220	40.97071:16 43.01527:8 44.04878:8 65.03793:4 70.06472:3 77.03968:20 84.95842:26 89.04186:30 90.04642:12 91.05126:33 98.05788:4 103.05537:8 115.05676:39 116.04868:8 117.05852:27 127.04317:4 127.05582:34 128.04887:8 142.06825:8 143.0746:62 144.07779:148	48702	49176	47711
130	6.012	360.72	144.08	3-(2-Hydroxyethyl)indole	[M+H]+	found in higher mz's MsMs_536; found in higher mz's MsMs_185	1	TRUE	null	233.2	C20H33NO4				2		FALSE	null	null	97.5	null	95.3	96.6	100	6406.22	PosIDA-2	144.07959:230660 145.08294:37977 146.0863:1983	42.03487:36 46.0811:10 51.02396:269 53.00113:24 62.01345:12 63.02248:60 65.03895:899 66.03459:296 67.04238:97 75.02682:132 77.03954:1928 78.04475:95 84.96215:48 89.03905:2326 90.04493:1694 90.77699:60 91.05378:5538 101.03791:414 102.04547:186 103.05519:815 104.04842:125 114.04642:36 114.70183:36 115.05505:11955 115.68619:24 116.06056:1154 116.70505:36 117.05679:4502 117.07045:6136 118.0649:424 11…	2079117	1969811	2055505
131	1.08	64.8	144.101	w/o MS2:N.epsilon.-Methyl-L-lysine	[M+H]+		1	TRUE	null	355.154	C21H24O6				2		FALSE	null	null	60.8	null	null	null	null	32.13	PosIDA-2	144.10149:3492 145.10484:275 146.1082:135	57.05761:12 58.06518:715 59.07294:148 84.95826:48 85.03066:48 144.10275:128	45229	47865	46136
132	1.08	64.8	145.049	w/o MS2:.beta.-D-Glucopyranose, 1,6-anhydro-	[M+H]+	found in higher mz's MsMs_184	1	TRUE	null	339.289	C21H40O4				3		FALSE	null	null	99.9	null	null	null	null	181.42	PosIDA-2	145.04907:13502 146.05242:1686 147.05578:854	43.01622:12 43.05486:36 53.01554:12 56.0569:12 70.06241:10 77.04341:10 85.02957:84 103.07394:10 127.94581:10	114562	120594	117632
133	13.446	806.76	145.131	Unknown	[M+H]+		1	FALSE	null	null	null	null	null	null	4		FALSE	null	null	null	null	null	null	null	23.9	PosIDA-1	145.13144:2159 146.13479:416 147.13815:94		56399	46446	48686
134	5.499	329.94	146.059	Unknown	[M+H]+		0.667	FALSE	null	null	null	null	null	null	4		FALSE	null	null	null	null	null	null	null	4.55	PosIDA-3	146.05882:1212 147.06217:645 148.06553:88		7682	7834	8212
135	4.48	268.8	146.06	w/o MS2:1H-Indole-4-carboxaldehyde	[M+H]+	found in higher mz's MsMs_244	1	TRUE	null	230.999	C8H7ClN2O2S	1,2,4-benzothiadiazine-1,1-dioxides	GDLBFKVLRPITMI-UHFFFAOYSA-N	O=S1(=O)NC(=NC=2C=CC(Cl)=CC21)C	2		FALSE	null	null	63.3	null	null	null	null	7.95	PosIDA-1	146.06032:1682 147.06367:813 148.06703:161	44.04957:12 56.04619:24 66.93095:10 68.98057:24 78.03349:10 83.08398:12 87.04021:24 91.04963:36 117.05511:12	11929	11307	11514
136	1.332	79.92	146.117	Acetylcholine cation	[M+H]+		1	TRUE	null	373.128	C20H20O7				2	2	FALSE	null	null	91.9	null	84.2	87.9	100	307.7	PosIDA-2	146.1165:64069 147.11985:7189 148.12321:931	42.03216:24 42.8893:132 43.01797:24622 44.04872:123 45.03424:36 45.05777:36 55.0419:12 56.05364:24 58.06414:290 59.07081:24 60.08179:1098 61.69693:12 68.98302:48 71.06949:12 71.07304:107 83.95563:12 86.09699:138 86.7815:180 87.04428:33210 87.71677:36 88.67819:36 89.81887:24 104.10425:24 128.93253:10 146.11816:1184	898666	930825	875833
137	1.535	92.1	147.043	p-Coumaric acid	[M+H]+	found in higher mz's MsMs_236	1	TRUE	null	378.264	C22H37NO5				2		FALSE	null	null	88	null	68.6	96.5	100	37.84	PosIDA-2	147.04192:3812 148.04527:598 149.04863:3235	43.01894:24 53.00221:10 58.06312:12 65.03677:36 67.93417:12 69.98254:10 82.92834:12 85.53845:10 88.0442:36 88.05473:12 91.05389:118 92.9586:12 115.04617:12 115.0552:12 119.04841:129 147.04704:36	28891	30083	29494
138	13.446	806.76	147.064	w/o MS2:2-Methylglutaric acid	[M+H]+	found in higher mz's MsMs_660; found in higher mz's MsMs_374	1	TRUE	4	607.166	C28H32O15	Flavonoid-3-O-glycosides	DGFGSUOQDJHNFL-UHFFFAOYNA-N	O=C3C(OC2OC(C)C(OC1OC(C)C(O)C(O)C1(O))C(O)C2(O))=C(OC4=CC(OC)=CC(O)=C34)C=5C=CC(O)=C(O)C=5	3		FALSE	null	null	98.9	null	null	null	null	220.64	PosIDA-2	147.06372:23428 148.06707:2793 149.07043:380	42.03494:10 45.03336:12 55.05862:10 64.92601:24 73.04684:12 105.95116:12	260773	276219	270960
139	0.964	57.84	147.074	w/o MS2:L-Glutamine	[M+H]+	adduct linked to 204_[M+Na]+	1	FALSE	null	193.1	C20H34O5				3	1	FALSE	null	null	97.7	null	null	null	null	12.82	PosIDA-2	147.07423:1778 148.07758:455 149.08094:392		16257	17467	17231
140	8.74	524.4	147.091	w/o MS2:8-Chloro-1-octanol	[M+H]+	similar chromatogram in higher mz_876; similar chromatogram in higher mz_914	1	TRUE	null	333.242	C21H34O4				3		FALSE	null	null	97.2	null	null	null	null	141.76	PosIDA-1	147.09113:15567 148.09448:2845 149.09784:372	41.04069:8 45.03424:4 51.01996:4 51.02096:16 53.03892:12 56.05678:8 61.05641:3 64.92479:12 65.0401:12 73.04675:12 75.72936:3 77.03833:352 78.04477:23 79.05524:62 80.04711:20 84.08674:8 89.03908:16 90.04229:8 91.05246:239 92.04809:16 93.05453:16 93.06941:143 102.03133:12 103.05237:114 104.04845:375 105.04787:16 105.06081:57 106.06509:110 114.02848:4 115.04004:8 117.05834:20 118.06188:12 119.06206:…	112942	101335	100401
141	0.918	55.08	148.059	w/o MS2:N-Methyl-D-aspartic acid	[M+H]+		1	FALSE	null	122.027	C3H7NO2S	Cysteine and derivatives	XUJNEKJLAYXESH-UWTATZPHSA-N	N[C@H](CS)C(O)=O	3		FALSE	null	null	98.4	null	null	null	null	31.04	PosIDA-3	148.05859:1489 149.06194:460 150.0653:155		8649	9363	10059
142	8.269	496.14	148.074	Unknown	[M+H]+	similar chromatogram in higher mz_245	1	FALSE	null	null	null	null	null	null	4		FALSE	null	null	null	null	null	null	null	27.12	PosIDA-3	148.07387:1322 149.07722:208 150.08058:225		9040	9758	9982
143	13.446	806.76	148.132	Unknown	[M+H]+	found in higher mz's MsMs_328	1	TRUE	null	null	null	null	null	null	4		FALSE	null	null	null	null	null	null	null	26.24	PosIDA-2	148.13191:5347 149.13526:776 150.13862:2265	44.0496:24 56.05043:10 58.06407:36 69.0715:24 91.05505:10 101.09422:12 131.04768:10 133.07828:12	117250	103819	117839
144	14.173	850.38	148.132	Unknown	[M+H]+		1	FALSE	null	null	null	null	null	null	4		FALSE	null	null	null	null	null	null	null	14.04	PosIDA-2	148.132:2336 149.13535:453 150.13871:2682		53193	65210	56767
145	12.673	760.38	148.132	Unknown	[M+H]+		1	TRUE	null	null	null	null	null	null	4		FALSE	null	null	null	null	null	null	null	13.52	PosIDA-2	148.13225:2962 149.1356:78 150.13896:888	43.01703:24 44.04777:24 44.05335:24 58.06197:12 58.06624:60 67.05156:10 70.02586:24 89.04565:10 98.09935:24	60672	44927	30818
146	1.103	66.18	148.132	Unknown	[M+H]+		1	TRUE	null	null	null	null	null	null	4		FALSE	null	null	null	null	null	null	null	87.62	PosIDA-1	148.13167:13679 149.13502:1864 150.13838:247	43.01609:36 44.04681:24 44.0496:131 45.03325:2600 58.06194:24 58.06514:60 60.07629:24 60.07955:942 74.02074:12 89.05884:60 148.13199:2826	140356	146768	142004
147	12.68	760.8	148.569	Unknown	[M+H]+	similar chromatogram in higher mz_280; similar chromatogram in higher mz_150; similar chromatogram in higher mz_527; similar chromatogram in higher mz_543	0.333	FALSE	null	null	null	null	null	null	4		FALSE	null	null	null	null	null	null	null	62.27	PosIDA-3	148.56924:1072 149.57259:282 150.57595:76		9347	9557	9620
148	13.302	798.12	149.022	Unknown	[M+H]+	found in higher mz's MsMs_702; found in higher mz's MsMs_789; found in higher mz's MsMs_415; found in higher mz's MsMs_379; found in higher mz's MsMs_200	1	TRUE	null	null	null	null	null	null	4		FALSE	null	null	null	null	null	null	80	59.68	PosIDA-1	149.02281:43635 150.02616:4931 151.02952:758	63.02481:12 65.03905:590 75.02815:10 80.0284:24 91.05795:36 93.03167:327 117.05547:10 121.0274:361 133.00903:10 149.02293:507	873004	853691	843375
149	1.47	88.2	149.022	Unknown	[M+H]+		0.333	FALSE	null	null	null	null	null	null	4		FALSE	null	null	null	null	null	null	null	2.61	PosIDA-2	149.02245:15129 150.0258:1479 151.02916:269		282542	320201	129778
150	12.673	760.38	149.023	Phthalic anhydride	[M+H]+	similar chromatogram in higher mz_280; similar chromatogram in higher mz_527; similar chromatogram in higher mz_543; found in higher mz's MsMs_543; found in higher mz's MsMs_416; found in higher mz's MsMs_280	1	TRUE	null	254.973	C7H5Cl2FN2O3	Polyhalopyridines	MEFQWPUMEMWTJP-UHFFFAOYSA-N	NC1=C(Cl)C(F)=NC(OCC(O)=O)=C1Cl	2		FALSE	null	null	90.7	null	83.3	83.8	100	467.61	PosIDA-1	149.02235:210072 150.0257:35158 151.02906:4021	41.03793:24 45.11419:10 53.00309:24 54.01145:12 55.01684:24 64.84222:62 65.03773:8673 65.50565:24 65.84432:24 80.02189:60 80.02816:255 92.02505:24 93.03273:3390 110.03263:12 111.03964:24 121.02857:4118 125.69962:10 133.00864:24 149.02248:7358	1999054	2031187	1949359
151	14.736	884.16	149.023	Unknown	[M+H]+		1	FALSE	null	null	null	null	null	null	4		FALSE	null	null	null	null	null	null	null	5.66	PosIDA-1	149.02258:17802 150.02593:1729 151.02929:211		376300	375158	366686
152	10.753	645.18	149.023	1,2-Benzenedicarboxylic acid	[M+H]+	found in higher mz's MsMs_225	1	TRUE	null	144.066	C6H11NO4				2		FALSE	null	null	90.2	null	93.6	90.7	50	55.65	PosIDA-2	149.02269:43756 150.02604:5386 151.0294:761	41.03982:8 45.03521:12 59.04498:4 61.02796:8 65.03787:1210 73.04559:12 75.04389:4 77.03715:8 79.01664:8 80.02709:20 82.03931:3 91.05251:20 92.75316:8 93.03294:700 98.09389:3 109.02606:12 114.9995:8 120.6604:8 121.02731:691 126.26814:3 133.0154:12 149.02281:1004	507944	521321	459288
153	8.47	508.2	149.023	w/o MS2:Phthalic anhydride	[M+H]+		0.333	FALSE	null	242.143	C10H19N5S	Methylthio-s-triazines	AAEVYOVXGOFMJO-UHFFFAOYSA-N	CSC1=NC(NC(N1)=NC(C)C)=NC(C)C	3		FALSE	null	null	99.8	null	null	null	null	3.34	PosIDA-1	149.02275:15791 150.0261:1461 151.02946:293		356806	274769	126795
154	0.964	57.84	150.012	w/o MS2:Dipicolinic acid	[M+H]+		1	TRUE	null	608.465	C32H66NO7P				3		FALSE	null	null	81	null	null	null	null	10.8	PosIDA-2	150.01212:2864 151.01547:412 152.01883:1010	44.04876:12 56.05054:10 62.97915:48 62.98249:131 70.06703:10 77.03595:10 93.05733:24 106.06374:10 117.05846:12 117.06149:24 120.00511:36 132.10481:24 134.1078:10 150.01918:36	17714	18635	18775
155	1.31	78.6	150.056	L-Methionine	[M+H]+		1	TRUE	null	331.263	C22H34O2				2	2	FALSE	null	null	98.3	null	95.9	98.4	100	84.71	PosIDA-3	150.05821:12345 151.06156:1057 152.06492:1319	41.03797:24 44.04776:30 44.97964:194 45.98688:99 46.02778:55 46.99469:30 47.96486:12 53.03684:37 55.88049:30 56.04939:4808 57.03217:30 58.99534:69 60.82756:18 61.01035:4476 64.93604:24 65.03892:6 70.99261:12 72.00408:51 74.02317:267 74.05937:131 74.98913:24 84.04295:98 85.01252:30 85.02934:76 87.0272:387 102.04825:18 102.05392:416 103.73532:18 104.05265:1154 105.0018:24 105.03485:56 105.96103:12 …	129218	132309	124051
156	1.888	113.28	150.075	Adenine, N6-methyl	[M+H]+	found in higher mz's MsMs_428; similar chromatogram in higher mz_1071	1	TRUE	null	373.3	C21H36O5				2		FALSE	null	null	84.4	null	78.3	82.4	60	362.52	PosIDA-1	150.07701:52808 151.08036:6900 152.08372:411	42.03025:12 42.03298:60 55.02827:12 59.05992:10 64.93371:36 70.068:24 79.06007:10 93.03271:12 94.04451:36 106.03745:24 108.05859:24 109.04776:89 117.0566:12 123.06737:36 133.05228:85 135.05426:36 150.02219:12 150.02733:48 150.07715:792	443855	468570	435397
157	5.73	343.8	150.076	Adenine, N6-methyl	[M+H]+	similar chromatogram in higher mz_425; similar chromatogram in higher mz_429; found in higher mz's MsMs_429	1	TRUE	null	427.1	C20H20O9				2		FALSE	null	null	92.6	null	93.1	91.1	77.3	542.99	PosIDA-1	150.07547:81292 151.07882:8832 152.08218:318	42.03305:30 45.03422:18 57.04278:6 57.04702:30 63.92971:12 66.04597:18 69.04007:6 70.06459:18 79.02654:6 82.03668:12 90.89861:5 94.0365:76 94.03786:119 96.05719:24 104.05985:6 106.03905:42 108.04272:205 119.02988:12 121.05033:18 123.06911:114 133.04762:31 135.05284:24 148.06383:24 150.0791:666 150.11517:24	683765	666266	672754
158	10.863	651.78	150.125	Diethylphenylamine	[M+H]+		1	TRUE	null	333.206	C20H30O5				2		FALSE	null	null	80.9	null	73.5	70.9	66.7	28.9	PosIDA-2	150.12706:3068 151.13041:1363 152.13377:5053	42.0322:12 45.03241:12 65.03791:12 66.04151:12 70.06469:12 73.04802:6 79.05158:24 91.04453:6 93.07222:12 105.06093:12 106.06375:135 108.07932:18 118.0681:12 118.43867:5 120.07887:247 121.08908:470 122.03844:12 124.51725:5 132.09999:18 134.09645:67 135.10518:99 148.11353:6 150.12914:594	57914	57604	38542
159	4.273	256.38	151.061	w/o MS2:L-Arabinitol	[M+H]+		1	TRUE	null	160.051	C8H7N3O2				3		FALSE	null	null	100	null	null	null	null	27.72	PosIDA-3	151.06148:8399 152.06483:1353 153.06819:154	45.03049:12 45.03331:36 55.02942:36 68.98418:67 82.03545:36 91.05381:24 94.03518:12 94.04198:48 104.04988:10 106.0622:24 110.03577:156 134.06383:24 136.09138:10 151.06346:190	52988	54915	53991
160	12.869	772.14	151.096	w/o MS2:Triethylene glycol	[M+H]+	found in higher mz's MsMs_509	1	TRUE	null	265.3	C21H41O7P				3		FALSE	null	null	99.8	null	null	null	null	13.02	PosIDA-2	151.09583:4152 152.09918:617 153.10254:397	45.01632:12 45.0342:83 65.03891:12 66.01859:24 68.97713:24 68.98528:36 73.04788:10 81.06657:24 95.03728:12 101.01106:10 110.01066:24 118.07549:10 124.1136:12 136.11253:36 151.12883:24	42094	47317	45181
161	8.74	524.4	152.016	w/o MS2:2(3H)-Benzothiazolone	[M+H]+		1	TRUE	null	184.112	C13H13N				3		FALSE	null	null	99.9	null	null	null	null	7.63	PosIDA-1	152.01613:1378 153.01948:204 154.02284:137	41.04071:24 42.0349:24 43.05571:12 45.03332:117 55.05441:18 59.04713:18 65.039:138 67.05621:24 77.03222:6 77.0396:38 79.05403:66 80.04967:24 81.07047:12 82.06725:12 90.03436:18 91.04314:30 91.05385:516 92.06158:66 93.05864:202 94.06378:24 96.07789:18 97.00936:24 104.0528:24 105.0695:66 106.06514:1300 107.07273:876 108.08218:226 109.08904:18 110.09761:18 115.05514:63 117.05233:12 117.05688:97 117.…	9854	8117	8906
162	1.068	64.08	152.055	Unknown	[M+H]+	found in higher mz's MsMs_641	0.667	TRUE	null	null	null	null	null	null	4		FALSE	null	null	null	null	null	null	null	7.27	PosIDA-3	152.05548:2002 153.05883:518 154.06219:1064	42.03312:15 45.03053:9 56.04845:81 59.04824:23 61.00937:6 63.00698:109 65.03678:6 69.98489:3 72.98571:9 81.07178:3 89.02329:12 106.04498:15 107.95834:12 111.01039:3 116.97654:20 135.02695:21 152.01654:21 152.05977:12	20374	21052	22968
163	1.581	94.86	152.056	Guanine	[M+H]+	similar chromatogram in higher mz_396	1	TRUE	null	419.352	C27H46O3				2		FALSE	null	null	85	null	78.8	86.5	57.1	10.31	PosIDA-2	152.05571:1611 153.05906:3227 154.06242:456	42.03484:24 46.06583:10 55.03352:12 66.93101:24 72.98796:12 92.0453:12 97.06448:10 107.95522:12 110.03271:130 127.03811:10 135.0332:143 135.07721:12 152.01797:48 152.05602:132	15729	14934	15315
164	3.006	180.36	152.056	Guanine	[M+H]+	found in higher mz's MsMs_977; found in higher mz's MsMs_435	1	TRUE	null	419.352	C27H46O3				2		FALSE	null	null	95.6	null	92	92.6	100	886.91	PosIDA-1	152.05602:137868 153.05937:16169 154.06273:1181	43.02997:146 44.02084:10 53.01038:24 53.01854:12 55.02842:267 65.01076:12 80.02586:175 82.03806:127 93.00999:36 97.01217:10 107.03796:112 109.05393:75 110.03439:855 118.14734:10 124.03885:24 134.04773:66 135.0302:2643 152.01654:36 152.05804:2253	1038175	1066757	1056276
165	8.808	528.48	152.106	w/o MS2:2-(2-Ethoxyethyl)pyridine	[M+H]+		1	TRUE	null	233.117	C14H16O3	Benzofuranones	JYMSPANBDPOHPX-UHFFFAOYNA-N	CC1(C)CCCC2(OC(=O)C3=CC=CC=C23)O1	2		FALSE	null	null	69.8	null	null	null	null	40.26	PosIDA-1	152.10617:12106 153.10952:2564 154.11288:444	41.03797:41 42.03395:49 43.01794:8 43.05198:8 45.03327:215 51.01893:8 55.05435:23 59.04599:4 59.04922:20 65.03893:314 66.05052:8 67.01825:8 68.04738:12 69.98477:20 77.03706:148 79.05519:146 80.0546:12 81.06911:12 84.0764:16 84.08154:56 84.62894:3 89.0377:20 90.04623:16 91.05241:1215 92.06149:158 93.05718:440 94.06367:43 95.06875:12 96.07916:12 104.0441:12 104.04839:85 105.06937:83 105.73598:8 106…	86685	83736	73722
166	1.642	98.52	153.04	Xanthine	[M+H]+		1	TRUE	null	207.2	C20H34O6				2	2	FALSE	null	null	94	null	94	94.3	76.9	86.54	PosIDA-1	153.03961:31353 154.04296:4011 155.04632:446	41.03884:304 43.01699:247 53.00821:12 53.01536:134 55.02934:2199 57.06921:36 59.0481:36 65.9263:10 67.05379:107 69.03301:24 69.0703:135 71.04811:24 76.01632:12 76.01999:48 77.037:60 81.00846:701 82.04041:750 83.02523:235 91.03495:12 91.05636:99 93.00842:241 93.06929:60 95.08099:36 97.06306:258 103.05366:10 107.08414:66 107.99306:198 108.01784:224 109.10055:110 110.03562:8256 130.31982:10 135.0298…	232927	230819	232881
167	1.011	60.66	154.056	w/o MS2:Benzoic acid, 2-amino-3-hydroxy-	[M+H]+		1	TRUE	null	455.168	C23H28O8				2		FALSE	null	null	66.6	null	null	null	null	21.67	PosIDA-3	154.05621:3502 155.05956:909 156.06292:15536	53.03896:12 56.02428:10 67.05737:12 70.07523:12 72.07798:10 79.05154:36 81.0629:12 81.07047:130 91.05519:10 95.08527:24 98.0675:36 108.08655:12 126.10271:10 136.04892:143 154.13496:24	25540	23604	25760
168	12.679	760.74	154.133	Unknown	[M+H]+		0.667	FALSE	null	null	null	null	null	null	4		FALSE	null	null	null	null	null	null	null	16.28	PosIDA-3	154.13266:7410 155.13601:1400 156.13937:35461		146730	158171	119694
169	0.964	57.84	155.041	w/o MS2:D-Asparagine	[M+H]+	adduct linked to 224_[M+Na]+	1	FALSE	null	144.032	C5H6ClN3				3		FALSE	null	null	98.9	null	null	null	null	16.67	PosIDA-1	155.04123:1562 156.04458:410 157.04794:120		10920	10841	11067
170	12.476	748.56	155.045	w/o MS2:Acipimox	[M+H]+		1	FALSE	null	187.039	C11H6O3				3		FALSE	null	null	99.9	null	null	null	null	16.79	PosIDA-2	155.04466:1689 156.04801:106 157.05137:51		11372	12557	11674
171	1.049	62.94	156.075	L-Histidine	[M+H]+	found in higher mz's MsMs_314	1	TRUE	null	349.202	C20H30O5				2	2	FALSE	null	null	97.2	null	93.9	98.6	100	63.32	PosIDA-2	156.07506:15950 157.07841:1886 158.08177:1337	41.03714:89 43.04009:24 54.03428:297 56.04844:774 59.05362:10 66.03467:286 68.04864:228 69.04133:24 79.05157:12 81.04398:684 81.0705:80 82.05077:939 82.07363:83 83.05992:2923 93.0438:2228 94.07198:24 95.05932:705 96.08481:24 110.07117:10307 111.05324:64 156.06491:24 156.07542:343	145671	162070	149629
172	14.368	862.08	156.138	Unknown	[M+H]+		1	FALSE	null	null	null	null	null	null	4		FALSE	null	null	null	null	null	null	null	151.33	PosIDA-1	156.13789:37656 157.14124:5045 158.1446:860		825068	759523	903209
173	1.011	60.66	158.091	w/o MS2:L-Arginine	[M+H]+		1	TRUE	null	633.168	C21H40O16P2				2		FALSE	null	null	78.7	null	null	null	null	42.9	PosIDA-1	158.0907:1966 159.09405:318 160.09741:69	44.04597:12 57.07253:24 70.06117:36 93.03976:12 99.02396:12 110.07119:24 112.08421:24 116.06072:12 138.1376:10 143.07454:10 158.09145:48	24467	24344	24607
174	1.103	66.18	158.126	Unknown	[M+H]+	similar chromatogram in higher mz_696	1	TRUE	null	null	null	null	null	null	4		FALSE	null	null	null	null	null	null	null	31.99	PosIDA-1	158.12749:1878 159.13084:474 160.1342:72	41.03878:12 43.0565:24 70.06326:12 81.06769:10 83.08263:12 95.97315:10 110.06784:12 112.06895:12 143.07066:12 143.08072:12 158.09087:36	21507	21298	20802
175	1.88	112.8	158.152	Unknown	[M+H]+	similar chromatogram in higher mz_774; similar chromatogram in higher mz_944; similar chromatogram in higher mz_920; found in higher mz's MsMs_920; similar chromatogram in higher mz_575; similar chromatogram in higher mz_1058	1	TRUE	null	null	null	null	null	null	4		FALSE	null	null	null	null	null	null	null	22.22	PosIDA-1	158.1521:1286 159.15545:194 160.15881:44	41.03983:24 57.0704:24 58.06633:89 65.04016:10 77.03718:12 83.08677:12 84.07911:24 102.09094:36 116.04107:10 158.05617:12 158.15315:79	12601	14815	12886
176	10.76	645.6	158.152	Unknown	[M+H]+		1	TRUE	null	null	null	null	null	null	4		FALSE	null	null	null	null	null	null	null	41.2	PosIDA-1	158.15225:2609 159.1556:412 160.15896:50	41.03798:83 46.02589:36 46.02969:111 56.04626:12 57.06926:60 102.09221:60 158.09825:36 158.15468:141	29170	30143	27687
177	1.604	96.24	159.026	w/o MS2:D(+)-Glucuronic acid .gamma.-lactone	[M+Na]+	adduct linked to 115_[M+H]+	1	TRUE	null	384.012	C17H13N3O5S2				3		FALSE	null	null	96.9	null	null	null	null	21.63	PosIDA-1	159.02629:6055 160.02964:789 161.033:79	55.94337:12 70.02814:12 72.04213:48 88.93181:10 98.09788:48 99.10049:24 115.05193:24 129.06615:12	42363	37843	40380
178	8.269	496.14	159.067	w/o MS2:3,3-Dimethylglutaric acid	[M+H]+	found in higher mz's MsMs_214; found in higher mz's MsMs_320; found in higher mz's MsMs_294; found in higher mz's MsMs_411; found in higher mz's MsMs_400; found in higher mz's MsMs_357; found in higher mz's MsMs_319; found in higher mz's MsMs_251; found in higher mz's MsMs_213	1	TRUE	null	347.218	C8H15NO3				2		FALSE	null	null	64.9	null	null	null	null	50.34	PosIDA-3	159.06696:14158 160.07031:3343 161.07367:357	77.03333:24 97.06999:24 99.07957:10 103.05368:60 104.04261:24 120.0448:12 130.06383:463 131.07497:74 132.05457:24 140.04921:10 144.05046:24 158.06111:60 159.06413:242	94616	102484	103930
179	4.28	256.8	160.075	Unknown	[M+H]+	found in higher mz's MsMs_226	1	TRUE	null	null	null	null	null	null	4		FALSE	null	null	null	null	null	null	66.7	7.71	PosIDA-2	160.07338:2767 161.07673:487 162.08009:79	41.03801:15 42.03489:5 43.01706:18 55.05335:5 56.94118:38 58.9954:4 59.04926:4 65.04124:2 70.0658:13 72.93773:4 77.03835:8 78.03363:1 79.0565:4 82.01386:4 83.08542:4 84.08032:6 89.03513:4 89.04042:6 91.05515:5 97.10052:8 97.96751:31 100.89281:9 100.93367:6 104.04846:6 105.06802:8 115.05209:62 116.05003:8 117.05836:46 118.06038:4 130.06079:6 131.06871:4 132.04829:24 132.08052:37 133.05255:9 140.04…	33493	34074	34986
180	3.425	205.5	160.075	Serotonin	[M+H]+	similar chromatogram in higher mz_219; similar chromatogram in higher mz_227; similar chromatogram in higher mz_615; found in higher mz's MsMs_615; found in higher mz's MsMs_227; found in higher mz's MsMs_222	1	TRUE	null	127.1	C19H36O5				2		FALSE	null	null	98.5	null	97.9	97.8	97	1604.33	PosIDA-2	160.07533:71379 161.07868:10357 162.08204:969	41.03983:16 42.03309:12 44.01432:12 50.0143:4 51.023:32 53.03691:12 54.0322:16 55.01801:44 56.94333:44 62.01352:4 62.01462:8 63.02254:16 65.03789:125 67.0413:136 77.03839:420 78.03615:16 78.04606:48 79.0553:311 80.04968:20 89.03782:329 90.04502:119 91.05521:195 92.0495:16 93.03296:22 93.05595:12 94.04068:90 97.96895:39 100.89005:8 102.04416:16 103.05387:306 104.04995:204 105.03645:35 105.05801:14…	634727	640031	627283
181	13.454	807.24	160.132	Unknown	[M+H]+		1	TRUE	null	null	null	null	null	null	4		FALSE	null	null	null	null	null	null	null	4.69	PosIDA-2	160.13168:2128 161.13503:423 162.13839:690	41.03895:24 42.03312:48 43.01711:48 44.05157:36 46.06594:24 56.05056:220 59.06442:24 67.05397:10 70.06705:114 84.08299:24 96.08897:10 128.10439:12 128.11232:36	48526	44601	40245
182	8.269	496.14	160.132	Unknown	[M+H]+		1	FALSE	null	null	null	null	null	null	4		FALSE	null	null	null	null	null	null	null	27.9	PosIDA-1	160.13181:1971 161.13516:227 162.13852:598		24977	25568	23269
183	12.673	760.38	160.134	w/o MS2:Pregabalin	[M+H]+		1	FALSE	null	297.242	C18H34O4				3		FALSE	null	null	99.9	null	null	null	null	3.91	PosIDA-3	160.13356:1797 161.13691:466 162.14027:835		29768	31197	16357
184	1.08	64.8	161.092	w/o MS2:Butanedioic acid, mono(2,2-dimethylhydrazide)	[M+H]+	found in higher mz's MsMs_456	1	TRUE	null	277.128	C12H20O7				3		FALSE	null	null	99.9	null	null	null	null	26.68	PosIDA-2	161.09175:5540 162.0951:1247 163.09846:347	40.97071:24 45.03337:10 58.06635:36 73.04685:10 84.95454:12 84.96358:36 91.05795:24 103.05395:24 105.06528:24 121.06598:36 127.05422:12 131.04642:24 133.10126:36 135.67146:10 145.06081:12 150.5694:10 161.09615:86	71592	73045	72095
185	6.012	360.72	161.106	Tryptamine	[M+H]+	similar chromatogram in higher mz_536	1	TRUE	null	764.272	C30H60N3O3				2	2	FALSE	null	null	98	null	97.1	97.3	100	135.06	PosIDA-1	161.10577:19707 162.10912:3569 163.11248:376	50.01328:12 65.03558:36 65.03898:65 66.0369:48 67.04012:36 77.03342:12 77.03957:646 78.04478:24 89.03645:729 90.0463:377 91.05382:2370 92.05079:24 101.03091:12 101.04077:232 102.04552:96 103.05381:528 104.0499:102 105.06946:48 111.80665:10 115.05059:2642 115.0536:5965 116.04852:414 116.06213:468 117.06443:2270 117.06747:4155 118.06495:241 126.04441:166 127.05248:3294 128.04871:844 129.05518:252 1…	179960	170052	173589
186	2.325	139.5	162.054	Unknown	[M+H]+	similar chromatogram in higher mz_277; found in higher mz's MsMs_277; found in higher mz's MsMs_303; similar chromatogram in higher mz_231	1	TRUE	null	null	null	null	null	null	4		FALSE	null	null	null	null	null	null	null	10.01	PosIDA-2	162.05414:1572 163.05749:325 164.06085:235	45.03235:12 60.98738:6 77.03831:5 81.96304:6 84.95957:37 98.95686:6 100.93926:5 104.05558:6 116.04546:6 119.04673:5 129.05991:6 131.04298:12 134.06218:24 147.07237:12	13566	13681	13202
187	3.448	206.88	162.054	w/o MS2:3-Aminocoumarin	[M+H]+		1	TRUE	null	368.037	C10H12N5O7P				2		FALSE	null	null	72.8	null	null	null	null	16.49	PosIDA-1	162.05246:2334 163.05581:861 164.05917:115	55.01899:10 60.98409:12 72.04697:10 82.92695:10 84.95827:60 92.06017:10 106.06794:24 115.05054:12 116.04697:24 117.06134:24 128.05023:12 134.05243:12 134.05893:60 162.05312:60 162.07811:36	21181	22448	23880
188	8.269	496.14	162.088	w/o MS2:3-(2-Hydroxyethyl)indole	[M+H]+		1	TRUE	7.66	1037.53	C53H82O20	NA			2		FALSE	null	null	69.7	null	null	null	null	19.89	PosIDA-2	162.08826:3178 163.09161:562 164.09497:54	41.04077:12 44.04787:12 62.98032:10 72.07807:12 84.95845:24 102.04568:12 106.07539:12 118.06057:24 119.07452:24 130.05942:24 131.07375:24 144.07446:10 147.06757:24 162.08916:36	23058	25101	24788
189	0.988	59.28	162.111	L-Carnitine	[M+H]+	similar chromatogram in higher mz_608; similar chromatogram in higher mz_868	1	TRUE	null	201	C23H16O6				2		FALSE	null	null	97.8	null	95.5	96.7	100	280.51	PosIDA-2	162.1129:43196 163.11625:6665 164.11961:1018	41.03714:48 43.01434:73 43.0171:2167 44.04969:258 45.05782:189 57.03015:60 57.03333:499 58.06633:375 59.07195:325 60.07967:1984 61.02908:36 84.95967:24 85.02819:1379 102.09094:1681 103.03966:2794 134.10944:10 162.11223:4288	314376	318240	322366
190	12.986	779.16	163.037	w/o MS2:7-Hydroxycoumarin	[M+H]+		1	TRUE	null	90.1	C17H25NO3				2		FALSE	null	null	62.9	null	null	null	null	9.38	PosIDA-1	163.03748:1719 164.04083:394 165.04419:65	43.02074:24 45.03331:48 51.02399:12 64.03072:12 73.04677:12 77.04205:48 84.07648:12 92.02525:36 103.09654:12 107.05241:10 130.05763:12 133.02994:24 145.05559:12 163.03658:12	15686	14412	15550
191	6.723	403.38	163.041	w/o MS2:L-Tyrosine	[M+H]+		1	TRUE	null	317.1	C26H38O5				2		FALSE	null	null	71.9	null	null	null	null	18.15	PosIDA-1	163.04083:2988 164.04418:535 165.04754:307	45.03421:48 57.06819:12 61.01364:10 77.03459:12 80.92902:12 103.07366:10 107.04649:12 119.06657:12 133.03465:10 163.03819:12	26215	22951	23893
192	1.057	63.42	163.059	w/o MS2:.beta.-D-Glucopyranose, 1,6-anhydro-	[M+H]+	found in higher mz's MsMs_632; similar chromatogram in higher mz_451	1	FALSE	null	247.2	C21H40O4				3		FALSE	null	null	99.1	null	null	null	null	37.06	PosIDA-3	163.05876:5559 164.06211:819 165.06547:213		47016	48829	48215
193	12.468	748.08	163.073	w/o MS2:Ser-Gly	[M+H]+		1	TRUE	null	403.305	C22H42O6				3		FALSE	null	null	98.1	null	null	null	null	9.82	PosIDA-2	163.07324:1682 164.07659:335 165.07995:200	45.03144:24 45.0352:60 62.98468:10 77.04083:24 84.08421:10 105.03786:48 117.04929:12 146.69516:10	14588	17991	16074
194	8.618	517.08	163.132	w/o MS2:Ethanol, 2-(2-butoxyethoxy)-	[M+H]+		1	TRUE	null	152.057	C5H5N5O				3		FALSE	null	null	99.8	null	null	null	null	8.98	PosIDA-3	163.13232:1463 164.13567:785 165.13903:604	41.03802:197 43.01984:30 45.03521:1197 55.05025:6 55.05233:54 57.06932:208 59.05252:12 73.08274:12 79.05278:6 89.04044:6 89.05897:30 89.07352:6 105.0666:12 107.06837:12 115.05212:18 130.06723:12	13347	11213	11931
195	11.533	691.98	164.142	w/o MS2:N-Ethyl-N-isopropylaniline	[M+H]+		1	FALSE	null	345.235	C19H34FO2P				3		FALSE	null	null	99.1	null	null	null	null	18.89	PosIDA-3	164.14203:2766 165.14538:1609 166.14874:4086		101592	55404	65381
196	1.535	92.1	165.054	L-Tyrosine	[M+H]+	found in higher mz's MsMs_236	1	TRUE	null	413.269	C26H38O5				2		FALSE	null	null	94.3	null	89	91.1	100	228.03	PosIDA-1	165.05409:15568 166.05744:2574 167.0608:381	51.02089:12 53.03987:24 65.04001:60 77.04069:453 82.94985:12 91.05635:332 93.06388:12 95.0468:1010 103.05223:36 107.04932:24 109.06979:36 119.04047:24 119.04813:466 121.05947:12 123.04411:758 137.06142:12 147.045:48	114072	109813	110940
197	3.097	185.82	166.085	DL-Phenylalanine	[M+H]+	adduct linked to 243_[M+Na]+	1	TRUE	null	494.2	C42H57N3O6				2	2	FALSE	null	null	97.2	null	95.7	95.7	100	320.41	PosIDA-2	166.08463:29751 167.08798:4793 168.09134:501	42.03398:162 50.01427:12 51.01997:48 51.02397:146 53.0379:60 65.03671:12 75.02199:12 77.03834:3050 79.054:932 80.04838:36 90.77301:12 91.05381:1553 92.04944:48 93.06942:1749 94.06374:36 102.04551:345 102.73658:48 102.74795:60 103.0538:13269 104.04845:48 105.06944:48 107.05092:444 118.06494:276 119.07278:219 119.71636:87 120.08183:28709 120.39245:24 131.04623:227 149.05698:48 152.17725:10 166.0875…	246145	246917	235885
198	1.515	90.9	166.085	(-)-Epinephrine	[M+H]+		0.333	TRUE	null	661.176	C31H32O16	Pentacarboxylic acids and derivatives	OOGPWQHGQYUIAW-UHFFFAOYNA-N	CC(O)(CC(O)=O)CC(=O)OC1C(CC(O)(CC1OC(=O)C=CC1=CC(O)=C(O)C=C1)C(O)=O)OC(=O)C=CC1=CC(O)=C(O)C=C1	2		FALSE	null	null	87.2	null	75	90.5	81.8	47.97	PosIDA-2	166.08478:2277 167.08813:374 168.09149:139	42.03302:7 46.99852:2 51.02392:7 56.04728:7 57.05546:7 60.98624:7 73.07065:5 77.03826:22 78.03973:5 79.05142:10 83.92985:5 84.9608:7 88.98078:12 91.05371:13 92.05607:7 94.03916:5 95.0482:10 96.05438:20 103.05511:5 106.00578:10 107.0479:78 109.03029:10 110.0386:5 112.91397:2 119.0497:7 120.04943:7 120.07863:19 123.04259:25 124.04798:10 133.02005:7 134.05721:5 135.0446:17 138.06151:5 146.06717:2 14…	60558	59548	59687
199	9.951	597.06	166.121	w/o MS2:Hordenine	[M+H]+		1	TRUE	null	361.238	C22H34O4				2		FALSE	null	null	74.9	null	null	null	null	7.49	PosIDA-3	166.12073:1774 167.12408:302 168.12744:572	42.03488:20 45.03236:12 55.0523:8 56.04943:16 68.04972:12 73.04674:8 77.03832:16 81.06663:4 84.95828:12 91.04843:4 91.05512:82 93.06805:12 94.06508:20 95.07289:8 96.0792:12 98.09799:20 105.06799:16 106.06362:57 107.07411:70 108.07919:56 110.09753:20 117.05528:8 118.06643:50 120.08026:481 121.08739:625 121.72865:8 122.09562:99 123.06758:8 124.11057:16 130.06395:4 131.07188:8 132.08047:64 133.08971…	11708	10045	12062
200	13.302	798.12	167.033	w/o MS2:1,2-Benzenedicarboxylic acid	[M+H]+	found in higher mz's MsMs_789	1	TRUE	null	162.076	C6H11NO4				2		FALSE	null	null	64.6	null	null	null	null	78.88	PosIDA-2	167.03267:8582 168.03602:1252 169.03938:171	42.033:24 46.01823:10 55.05534:36 67.05608:24 69.04815:12 80.04449:12 84.08147:24 93.03139:12 94.06359:36 95.07823:12 98.09508:12 107.08267:12 108.08341:36 109.08588:48 121.02551:24 123.09075:24 125.10758:12 135.09995:12 137.11394:24 138.11417:24 149.02078:12 149.02251:24 150.1339:24 165.13622:12 167.15714:60	119828	116733	104932
201	12.01	720.6	167.142	w/o MS2:3,5,5-Trimethyl-1-hexanol	[M+H]+		1	FALSE	null	215.082	C12H12N2O3				3		FALSE	null	null	99.5	null	null	null	null	13.87	PosIDA-3	167.14159:1863 168.14494:5055 169.1483:871		16373	15550	17709
202	11.727	703.62	167.142	Unknown	[M+H]+	found in higher mz's MsMs_447	1	FALSE	null	null	null	null	null	null	4		FALSE	null	null	null	null	null	null	null	48.32	PosIDA-3	167.14162:5703 168.14497:5362 169.14833:751		38012	39460	44894
203	12.673	760.38	168.148	Unknown	[M+H]+		1	FALSE	null	null	null	null	null	null	4		FALSE	null	null	null	null	null	null	null	21.72	PosIDA-2	168.14777:6188 169.15112:994 170.15448:27033		114048	110790	96653
204	0.964	57.84	169.058	w/o MS2:L-Glutamine	[M+Na]+	adduct linked to 139_[M+H]+	0.333	FALSE	null	137.001	C3H7O4P				3		FALSE	null	null	99.9	null	null	null	null	25.35	PosIDA-3	169.05794:1009 170.06129:201 171.06465:167		6784	6664	7285
205	12.971	778.26	169.922	Unknown	[M+H]+		1	FALSE	null	null	null	null	null	null	4		FALSE	null	null	null	null	null	null	null	43.24	PosIDA-3	169.92178:1110 170.92513:101 171.92849:1731		7538	8037	8024
206	1.011	60.66	170.031	w/o MS2:.beta.-(2-Thienyl)-D-alanine	[M+H]+		1	TRUE	null	137.071	C7H9N2O				3		FALSE	null	null	95.4	null	null	null	null	7.32	PosIDA-2	170.03119:1832 171.03454:241 172.0379:332	43.01797:48 66.02094:24 69.03428:36 77.03711:12 92.04675:225 93.05724:368 95.08795:36 97.06734:100 107.07994:12 107.96261:12 119.08349:10 129.06631:12 135.11972:36 152.06136:48 153.13022:136 170.0984:311	12709	13014	12166
207	14.369	862.14	170.154	w/o MS2:Gallamine trication	[M+H]+		0.667	FALSE	null	448.095	C18H14F4N2O4S				3		FALSE	null	null	100	null	null	null	null	117.91	PosIDA-3	170.15382:30677 171.15717:6549 172.16053:927		546515	666238	699255
208	13.169	790.14	171.136	w/o MS2:trans-2-Octenoic acid, ethyl ester	[M+H]+	found in higher mz's MsMs_453	0.333	TRUE	null	269.081	C16H12O4				2		FALSE	null	null	64.2	null	null	null	null	12.02	PosIDA-1	171.13564:2408 172.13899:820 173.14235:431	41.03801:36 42.03399:48 43.01891:36 44.05059:91 45.03331:24 46.06494:89 55.05336:150 57.06824:36 58.06522:94 59.06867:48 69.07042:60 70.06816:48 72.04463:110 73.06236:36 80.05341:12 83.08672:24 89.06822:24 89.07087:48 92.05081:12 94.06512:125 95.07294:60 98.09248:48 99.10344:24 101.08731:10 108.07924:36 109.08315:24 110.09612:117 112.10938:24 122.08949:12 137.11584:24 139.1282:151 142.10986:12 14…	39733	26940	25391
209	11.263	675.78	171.138	Unknown	[M+H]+	similar chromatogram in higher mz_469; similar chromatogram in higher mz_539; similar chromatogram in higher mz_568; similar chromatogram in higher mz_662; similar chromatogram in higher mz_668; similar chromatogram in higher mz_673; similar chromatogram in higher mz_707; similar chromatogram in higher mz_758; similar chromatogram in higher mz_788; found in higher mz's MsMs_469; found in higher m…	1	TRUE	null	null	null	null	null	null	4		FALSE	null	null	null	null	null	null	null	110.84	PosIDA-1	171.13712:17219 172.14047:3670 173.14383:629	41.03972:73 42.04117:24 43.05561:36 44.05143:72 45.05675:12 46.06579:48 55.05012:12 55.05532:159 57.06812:84 59.07286:48 72.04448:169 73.02624:36 83.08398:24 89.06803:36 89.07333:48 94.05812:36 95.07684:24 98.0645:24 101.0589:24 109.08439:24 112.11062:12 139.12791:24 139.13452:60 142.12294:24 171.13855:123 171.15506:71	163192	126571	140353
210	8.916	534.96	171.149	w/o MS2:N8-Acetylspermidine	[M+H]+		1	TRUE	null	829.68	C46H91N2O6P	Phosphosphingolipids	PENYJGUXTJATDH-FKOSZORSSA-N	CCCCCCCCCCCCCCCCCCCCCCC(O)=N[C@H](COP([O-])(=O)OCC[N+](C)(C)C)[C@@H](O)\C=C\CC\C=C\CCCCCCCCC	3		FALSE	null	null	99.2	null	null	null	null	18.06	PosIDA-1	171.14795:4940 172.1513:583 173.15466:136	42.03573:8 43.01699:12 43.05471:8 44.04959:46 45.053:8 46.06486:198 55.05223:97 58.06619:16 59.06426:8 69.06914:81 70.97839:12 72.04332:316 77.03454:4 83.0853:64 89.0694:123 93.05305:12 93.05982:16 94.06089:12 98.0951:8 99.10048:8 105.0693:12 107.08125:8 110.09447:8 125.10447:8 139.12798:16 142.11966:8 153.1248:16 154.13121:27 156.0961:8 171.15697:94	48368	54756	61067
211	9.621	577.26	173.08	w/o MS2:Malathion	[M+H]+		1	TRUE	null	91.0542	C7H9N				3		FALSE	null	null	99.5	null	null	null	null	26.77	PosIDA-1	173.07982:6051 174.08317:912 175.08653:318	43.0179:12 55.05325:38 57.04059:6 73.0634:12 80.05701:6 82.07214:24 83.0482:18 86.09425:6 90.89848:6 95.06318:6 101.0575:6 111.03965:6 111.05:18 115.05188:12 130.06216:6 131.08614:12 131.96588:6 155.07625:12 158.0822:6 173.0869:18 173.10904:12	72471	66808	62295
212	8.27	496.2	173.082	w/o MS2:Suberic acid	[M+H]+	found in higher mz's MsMs_294	0.667	FALSE	null	123.092	C7H10N2				3		FALSE	null	null	99.9	null	null	null	null	7.29	PosIDA-2	173.08226:3171 174.08561:1065056 175.08897:124525		54434	57973	37673
213	8.269	496.14	173.558	Unknown	[M+H]+		1	TRUE	null	null	null	null	null	null	4		FALSE	null	null	null	null	null	null	null	583.77	PosIDA-1	173.5582:2483 174.56155:570 175.56491:169	43.01712:48 57.03548:12 65.03568:24 75.02818:10 77.03722:100 78.04613:112 84.0573:12 89.03393:12 89.03922:120 90.04243:60 91.05395:396 102.04566:48 103.05538:613 104.04861:337 104.06149:218 105.05811:351 106.04214:24 108.05751:48 114.05113:36 115.05376:1479 116.0502:205 116.05927:187 117.05853:261 117.07067:272 118.06664:60 126.04302:24 128.04889:118 129.05696:48 130.06419:6981 130.67746:36 131.0…	17900	19572	20032
214	8.269	496.14	174.09	5-Methoxytryptamine	[M+H]+	found in higher mz's MsMs_835; found in higher mz's MsMs_612; found in higher mz's MsMs_580; found in higher mz's MsMs_411; found in higher mz's MsMs_400; found in higher mz's MsMs_357; found in higher mz's MsMs_320; found in higher mz's MsMs_319; found in higher mz's MsMs_294; found in higher mz's MsMs_251; found in higher mz's MsMs_293	1	TRUE	null	346.274	C22H37NO3				2		FALSE	null	null	94.3	null	90.7	91.6	94.4	3586.52	PosIDA-1	174.09065:563785 175.094:113770 176.09736:8129	41.03977:24 43.01794:102 51.02193:24 56.05045:24 65.03667:60 70.06106:12 75.02072:10 77.03952:314 78.0472:291 84.07898:60 89.0377:452 90.04756:179 91.05241:646 101.03506:12 102.04403:130 103.05373:1463 104.05125:512 104.06126:554 105.05644:1091 106.06358:36 107.0494:115 108.05582:36 113.03922:36 114.04639:48 115.05502:2088 116.04995:457 116.06204:510 117.05827:787 117.07041:457 118.06487:165 119.…	4094350	4553818	4540160
215	13.446	806.76	174.148	w/o MS2:Butyrylcholine cation	[M+H]+		1	TRUE	null	151.075	C9H10O2				3		FALSE	null	null	99.4	null	null	null	null	14.3	PosIDA-1	174.14784:3746 175.15119:680 176.15455:283	42.03307:36 43.0189:48 44.04966:48 70.0658:522 84.08032:170 99.0783:24 142.12657:60 156.13138:12 156.14189:48 174.13861:36	88593	86888	105793
216	12.673	760.38	174.148	Unknown	[M+H]+		1	TRUE	null	null	null	null	null	null	4		FALSE	null	null	null	null	null	null	null	10.19	PosIDA-1	174.14777:2648 175.15112:492 176.15448:285	41.03793:82 42.03299:94 43.0179:60 44.05143:48 55.05221:12 56.04934:60 58.06937:24 70.06215:335 79.05386:12 84.08017:214 98.09367:12 131.06848:24 142.12296:48 156.13985:48	38832	41798	22751
217	11.248	674.88	174.991	Unknown	[M+H]+		1	FALSE	null	null	null	null	null	null	4		FALSE	null	null	null	null	null	null	null	65.58	PosIDA-1	174.99086:8317 175.99421:425 176.99757:4609		103957	104334	82725
218	1.604	96.24	175	w/o MS2:Aminopterin	[M+H]+		1	TRUE	null	776.617	C42H84NO7P	1-alkyl,2-acylglycero-3-phosphocholines	ITFYCOXGRQISEW-HYOGKJQXNA-N	CCCCCCCCCCCCCCCC(=O)OC(COCCC\C=C/CCCCCCCCCCCCC)COP([O-])(=O)OCC[N+](C)(C)C	3		FALSE	null	null	99.9	null	null	null	null	22.58	PosIDA-3	175.00049:3088 176.00384:255 177.0072:632	41.03804:12 43.31562:10 60.05033:12 69.00288:12 70.06468:36 80.97078:10 86.006:36 101.06059:10 105.02498:12 120.95175:10 134.92592:10 160.05113:12 175.11906:36	29805	30688	29165
219	3.425	205.5	175.084	w/o MS2:3,6-Dimethylchromone	[M+H]+		1	TRUE	null	471.275	C28H40O6	5,10-cycloaromadendrane sesquiterpenoids	IBLPTYJTKWQCDX-UHFFFAOYNA-N	CC(C)CC(C1=C(O)C(C=O)=C(O)C(C=O)=C1O)C1(C)CCC2C1C1C(CCC2(C)O)C1(C)C	2		FALSE	null	null	60.6	null	null	null	null	17.28	PosIDA-2	175.08414:2026 176.08749:711 177.09085:10454	44.05066:24 59.04827:12 68.99478:36 70.06591:12 73.04567:24 83.08682:10 91.05262:24 99.52704:10 103.05254:24 118.06513:60 129.05537:24 130.06419:131 133.05437:24 146.05739:92 147.05905:36 155.06279:24 156.07028:36 157.07578:72 158.08624:36 175.08582:299 175.11179:24	17090	17144	16445
220	0.995	59.7	175.117	DL-Arginine	[M+H]+	adduct linked to 260_[M+Na]+	1	TRUE	null	250.119	C12H15N3O3				2	2	FALSE	null	null	96.7	null	94.2	95.7	100	295.35	PosIDA-1	175.11743:46874 176.12078:6814 177.12414:722	41.03894:60 43.02814:483 43.05206:163 44.04597:24 48.37373:10 59.8755:24 60.05468:2785 68.04633:48 69.85356:60 70.06469:13786 71.05183:264 72.07921:417 73.0648:36 86.00472:36 88.07317:36 95.05933:12 98.06062:83 112.08719:417 114.102:48 115.0868:60 116.06979:1851 130.09612:1179 133.09311:24 139.00923:12 141.06705:36 157.10556:60 158.08969:339 175.11911:984	418902	432890	428891
221	0.964	57.84	176.028	w/o MS2:N-(4-Ethoxyphenyl)-3-(3-(nitrophenyl)acrylamide	[M+H]+		1	FALSE	null	231	C21H30O2				3		FALSE	null	null	80.6	null	null	null	null	35.23	PosIDA-2	176.02763:1374 177.03098:6512 178.03434:711		8979	9270	8911
222	3.433	205.98	176.069	w/o MS2:3-Indoleacetic acid	[M+H]+	found in higher mz's MsMs_276	1	TRUE	null	446.224	C30H29N3O				2		FALSE	null	null	65.3	null	null	null	null	16.18	PosIDA-3	176.06877:1382 177.07212:238 178.07548:1234	55.01698:10 71.08256:10 97.06465:10 103.05531:24 114.9875:10 117.0554:12 120.0896:24 122.94794:12 129.04729:12 130.06409:48 131.04793:12 142.06647:24 146.05386:36 146.05725:48 147.07082:24 158.05966:36 160.06886:24 176.07051:36	11401	12852	13128
223	11.248	674.88	176.987	Unknown	[M+H]+	similar chromatogram in higher mz_559; similar chromatogram in higher mz_550; similar chromatogram in higher mz_360; similar chromatogram in higher mz_568; similar chromatogram in higher mz_662; similar chromatogram in higher mz_668; similar chromatogram in higher mz_788	1	FALSE	null	null	null	null	null	null	4		FALSE	null	null	null	null	null	null	null	18.78	PosIDA-1	176.98695:2740 177.9903:125 178.99366:34		26374	31389	25609
224	0.964	57.84	177.023	w/o MS2:7,8-Dihydroxycoumarin	[M+Na]+	adduct linked to 169_[M+H]+	1	TRUE	null	361.092	C18H16O8	Coumaric acids and derivatives	DOUMFZQKYFQNTF-WUTVXBCWSA-N	OC(=O)[C@@H](CC1=CC(O)=C(O)C=C1)OC(=O)\C=C\C1=CC(O)=C(O)C=C1	3		FALSE	null	null	94.1	null	null	null	null	11.72	PosIDA-2	177.02278:2355 178.02613:1006 179.02949:337	43.01802:36 45.0437:60 62.98138:24 70.06703:48 88.02052:10 98.05922:10 117.07059:12 146.05051:10 149.02631:60 159.01143:36 159.99971:97 177.02458:60	14244	14975	15097
225	10.753	645.18	177.053	w/o MS2:6-Hydroxy-4-methylcoumarin	[M+H]+		1	TRUE	null	152.035	C7H7NO3				2		FALSE	null	null	79.4	null	null	null	null	29.47	PosIDA-2	177.05257:6689 178.05592:1182 179.05928:407	43.01983:12 65.03334:18 65.03786:421 80.02457:12 91.05384:24 93.03429:426 101.06054:6 105.07092:6 115.0431:6 121.02728:614 131.07838:12 149.02451:1508 159.08031:12 161.35062:5 177.05247:12	52080	54612	46682
226	4.288	257.28	177.101	Unknown	[M+H]+		1	TRUE	null	null	null	null	null	null	4		FALSE	null	null	null	null	null	null	76.5	9.22	PosIDA-2	177.10107:1919 178.10442:458 179.10778:301	59.05463:5 65.04122:24 71.01511:5 77.03463:12 84.04816:5 90.04627:18 91.05379:44 93.03423:24 95.08657:6 103.04809:6 104.05273:39 105.06799:12 107.06541:6 113.04226:12 115.05507:168 116.05:30 117.05377:100 118.06339:45 121.02259:12 130.05916:12 130.06715:79 132.04181:199 132.08049:181 133.05412:12 140.04604:37 142.06467:171 145.04707:6 149.021:78 159.06784:12 160.07405:366 177.10463:30	24850	24464	27297
227	3.425	205.5	177.101	Serotonin	[M+H]+	similar chromatogram in higher mz_250; similar chromatogram in higher mz_615	1	TRUE	null	353.127	C35H38Cl2N8O4				2	2	FALSE	null	null	98	null	95.8	98.5	100	43.05	PosIDA-1	177.10094:8034 178.10429:1746 179.10765:541	65.03669:48 67.04008:60 72.28404:10 77.03708:135 79.05521:119 89.03111:12 89.03773:219 90.04493:151 91.05377:115 93.03287:48 94.04195:48 103.05235:202 104.04699:83 105.05647:59 105.06941:602 107.05234:48 115.05354:2279 116.04999:213 117.05679:1444 121.09972:36 130.06554:372 131.04939:197 131.07347:158 132.04341:48 132.08047:1284 133.05087:176 133.06543:360 140.04602:36 141.05519:60 142.06465:512 …	70858	69763	71861
228	1.011	60.66	178.058	w/o MS2:Luminol	[M+H]+		1	TRUE	null	402.022	C17H13N3O5S2				3		FALSE	null	null	95.1	null	null	null	null	7.26	PosIDA-1	178.05794:1536 179.06129:431 180.06465:440	43.01713:12 72.04594:10 88.01402:12 93.03172:12 107.07724:10 133.03499:10 150.01932:12 178.05807:12	12602	11900	11610
229	7.695	461.7	178.086	w/o MS2:N-Hydroxy-3,4-methylenedioxyamphetamine	[M+H]+		0.333	TRUE	null	238.145	C13H21NO3				3		FALSE	null	null	99.9	null	null	null	null	5.88	PosIDA-2	178.08595:1348 179.0893:224 180.09266:61	44.01988:5 62.93126:5 67.04586:6 67.0539:6 81.07297:5 88.02309:30 91.04981:6 93.06132:6 97.96613:12 102.04411:6 103.05524:5 111.01326:5 120.06955:6 132.08215:6 135.06596:12 136.07178:18 143.04591:5 148.07074:6 148.07245:6 150.02937:6 160.07233:12 176.05553:6 176.07042:12 178.15697:18	14234	13195	13440
230	11.925	715.5	179.152	Unknown	[M+H]+		1	FALSE	null	null	null	null	null	null	4		FALSE	null	null	null	null	null	null	null	29.87	PosIDA-2	179.1523:2630 180.15565:1368 181.15901:613		35182	32665	44503
231	2.318	139.08	180.065	w/o MS2:L-Tyrosine	[M+H]+		1	TRUE	null	439.209	C24H31F3O5				2		FALSE	null	null	70.1	null	null	null	null	133.33	PosIDA-3	180.06526:13309 181.06861:2220 182.07197:259	42.033:276 43.01791:18 44.05051:166 45.03135:18 51.02589:18 53.03782:43 55.0158:18 55.0543:24 58.02771:40 63.02908:6 65.03547:24 67.05378:30 77.03574:12 78.03473:6 80.04698:24 81.03115:300 81.05514:30 82.02769:18 83.0482:192 84.04675:18 93.03274:30 94.06493:58 95.04813:113 96.07768:59 106.06779:66 107.0754:80 109.02875:176 110.05911:18 111.04408:24 116.05133:12 121.02856:30 123.04562:18 124.076:5…	132377	133249	133281
232	1.057	63.42	180.085	w/o MS2:Galactosamine	[M+H]+		1	FALSE	null	120.044	C11H16N2O				3		FALSE	null	null	98.3	null	null	null	null	17.48	PosIDA-2	180.08472:1674 181.08807:422 182.09143:130		17075	17448	17329
233	5.477	328.62	180.52	Unknown	[M+H]+		0.667	TRUE	null	null	null	null	null	null	4		FALSE	null	null	null	null	null	null	null	227.28	PosIDA-1	180.51741:1007 181.52076:80 182.52412:48	41.0263:7 41.90857:16 42.03395:2962 42.288:5 44.04963:7 45.03704:5 52.01643:7 52.01845:10 54.0208:33 54.03316:36 55.02939:55 56.04836:12 57.04596:10 66.03571:12 67.02974:64 68.03582:53 68.04739:5 68.83979:14 69.04472:2152 70.02702:7 79.03027:10 80.01572:13 81.04261:104 82.01762:12 82.05065:7 83.02274:141 83.05853:46 84.05456:7 93.04502:218 94.03921:531 95.02228:96 95.04688:32 95.06055:7 95.76602:…	6694	7810	6234
234	0.988	59.28	181.063	w/o MS2:Nicotinuric acid	[M+H]+	adduct linked to 271_[M+Na]+	1	FALSE	8.73	721.366	C33H56O14	Glycosylmonoacylglycerols	MPSGDHOYFIUPSO-UHFFFAOYNA-N	O=C(OCC(O)COC2OC(COC1OC(CO)C(O)C(O)C1(O))C(O)C(O)C2(O))CCCCCCCC=CCC=CCC=CCC	3		FALSE	null	null	98.4	null	null	null	null	42.61	PosIDA-3	181.06259:2805 182.06594:304 183.0693:929		24397	24448	25083
235	5.474	328.44	181.072	Theophylline	[M+H]+	adduct linked to 272_[M+Na]+	1	TRUE	null	263.237	C18H32O2				2	2	FALSE	null	null	94	null	87.4	91.7	100	6186.58	PosIDA-2	181.07199:235922 182.07534:33427 183.0787:3422	40.01856:70 41.02551:111 41.9105:69 42.03407:13334 42.49721:24 45.04375:36 49.44376:10 52.0196:48 54.03228:99 55.0285:134 56.05061:48 57.04399:48 66.03247:48 67.02647:138 68.03484:75 68.83765:60 69.04491:7733 70.02838:24 79.02673:36 80.01091:24 81.04282:466 82.0153:60 83.02296:469 83.06002:190 93.04391:585 94.03946:2145 95.0239:278 95.04713:106 95.7649:74 96.05606:12445 96.63833:24 97.03992:569 1…	1565938	1672247	1463774
236	1.535	92.1	182.08	L-Tyrosine	[M+H]+	adduct linked to 275_[M+Na]+; found in higher mz's MsMs_652	1	TRUE	null	82	C5H6N2O3				2	2	FALSE	null	null	97.8	null	96.2	96.1	100	228.62	PosIDA-1	182.08058:23777 183.08393:4960 184.08729:2374	43.04273:36 51.02087:36 53.04087:36 59.04699:12 63.75483:10 65.03886:387 67.05721:24 75.01942:12 77.0382:1167 79.05386:36 81.07028:48 91.04695:120 91.05364:10122 91.45286:24 93.05708:24 93.07061:48 94.04317:48 95.0495:2858 102.04533:12 102.04675:24 103.05219:158 107.04637:578 108.08193:63 109.06389:182 116.04831:12 117.05511:36 118.06168:285 118.6903:24 119.04961:4384 121.06251:60 123.04405:3853 …	176358	177244	177032
237	8.322	499.32	182.189	Unknown	[M+H]+		1	TRUE	null	null	null	null	null	null	4		FALSE	null	null	null	null	null	null	null	18.4	PosIDA-1	182.18883:1837 183.19218:525 184.19554:549	41.03806:20 43.01804:8 44.05064:16 53.04002:12 55.02845:12 55.05447:113 56.9402:12 57.06937:12 58.06742:16 68.04868:8 69.06817:12 70.0659:20 72.07567:4 72.08043:49 73.05045:4 79.05411:12 81.06676:8 83.08425:37 84.07915:16 86.09582:57 91.05662:12 94.06387:8 96.07936:8 97.07578:12 97.96764:16 98.09538:44 100.11549:40 108.07791:12 111.08877:8 112.10802:8 123.09268:8 125.10326:8 126.12804:16 128.955:…	18090	20041	19853
238	13.23	793.8	183.1	w/o MS2:9,11-Methane-epoxyprostaglandin F1.alpha.	[M+H]+		1	TRUE	null	450.02	C12H21NO11S3	Monosaccharides	URMYQRGDHJRORU-IPQUCONDSA-N	CS(=O)\C=C\CC(C(O)=NOS(O)(=O)=O)[C@@]1(S)O[C@H](CO)[C@@H](O)[C@H](O)[C@H]1O	3		FALSE	null	null	100	null	null	null	null	25.08	PosIDA-2	183.10007:2935 184.10342:651 185.10678:373	42.033:36 43.05655:24 45.037:12 56.05671:24 58.06405:24 67.05608:12 69.05049:12 73.0898:24 77.03822:24 81.06905:36 83.061:12 86.09296:12 95.0714:12 97.07964:24 98.08259:12 101.11534:12 105.02761:12 110.0106:24 112.09878:12 121.07798:12 126.10877:24 137.07291:12 140.10561:12 151.12013:12 154.13641:12 167.07013:24 182.07889:12 183.17618:36	29965	29712	28374
239	1.057	63.42	184.073	Phosphocholine	[M+H]+		1	TRUE	2.694	301.06	C10H12N4O5S	Indoles and derivatives	OZCACMPSTYQSMM-SDQBBNPINA-N	CN1C(CC2=C\C(=N\NC(O)=N)C(=O)C=C12)S(O)(=O)=O	2	2	FALSE	null	null	93.4	null	86.8	90.4	100	16.56	PosIDA-3	184.07262:8103 185.07597:407 186.07933:149	43.04182:12 45.03228:178 56.04724:12 56.05144:60 60.07842:48 60.07951:60 70.06567:12 71.07172:216 80.97434:48 86.09683:682 87.05982:10 98.97901:48 98.98599:483 104.10548:48 124.99933:947 166.06555:48 184.07304:390	146882	167309	149721
240	1.835	110.1	184.096	w/o MS2:(-)-Epinephrine	[M+H]+	found in higher mz's MsMs_302; found in higher mz's MsMs_268	1	TRUE	null	617.114	C28H24O16	Flavonoid-3-O-glycosides	PXGWEUQZDRUMRE-UHFFFAOYNA-N	OCC1OC(OC2=C(OC3=CC(O)=CC(O)=C3C2=O)C2=CC(O)=C(O)C=C2)C(OC(=O)C2=CC(O)=C(O)C(O)=C2)C(O)C1O	2	1	FALSE	null	null	72.3	null	null	null	null	11.67	PosIDA-1	184.09593:5865 185.09928:931 186.10264:134	45.03331:24 58.06735:12 81.06665:12 84.96089:24 95.04147:12 95.04694:36 98.982:24 105.03352:24 106.04055:24 124.05594:12 124.07468:139 125.01057:24 149.0433:24 166.0894:36 184.07344:36 184.10008:24	45586	42716	43259
241	5.662	339.72	184.169	Unknown	[M+H]+	similar chromatogram in higher mz_504; found in higher mz's MsMs_504	1	TRUE	null	null	null	null	null	null	4		FALSE	null	null	null	null	null	null	null	5.94	PosIDA-1	184.16792:1946 185.17127:437 186.17463:24	44.19583:10 56.95695:12 72.08021:12 95.08369:10 101.98161:10 106.03893:12 128.10878:10 149.04475:12 155.0815:10 184.07501:12	13810	15474	14102
242	1.31	78.6	188.008	w/o MS2:Nithiamide	[M+H]+	found in higher mz's MsMs_586	1	FALSE	null	253.159	C18H22O2				3		FALSE	null	null	89	null	null	null	null	41.21	PosIDA-1	188.00757:1282 189.01092:121 190.01428:129		12781	11887	11347
243	3.097	185.82	188.067	w/o MS2:1-(2-Hydroxyethyl)-2-hydroxymethyl-5-nitroimidazole	[M+Na]+	adduct linked to 197_[M+H]+	1	TRUE	null	348.142	C16H23NO6				3		FALSE	null	null	99.9	null	null	null	null	9.36	PosIDA-1	188.067:2112 189.07035:362 190.07371:53	52.5387:10 57.06935:12 73.06841:10 81.06673:12 85.10452:10 88.02054:24 109.10082:10 115.07477:12 170.90247:10	15186	15638	15725
244	4.48	268.8	188.069	L-Tryptophan	[M+H]+		1	TRUE	null	429.264	C26H38O6				2		FALSE	null	null	94.1	null	87.5	93.4	100	130.84	PosIDA-2	188.06935:9144 189.0727:1960 190.07606:112	43.0162:6 65.03568:12 68.9808:6 77.04215:6 86.99602:6 89.0379:18 91.05395:420 95.04708:6 98.094:18 115.05376:254 116.04568:24 117.05701:120 118.06512:879 122.11598:5 127.05583:38 135.07918:5 140.04462:12 142.06659:110 143.07294:243 144.07948:216 146.05907:523 170.05844:80 188.03902:6 188.06787:51	66993	65122	65595
245	8.276	496.56	188.162	Unknown	[M+H]+		1	FALSE	null	null	null	null	null	null	4		FALSE	null	null	null	null	null	null	null	5.67	PosIDA-2	188.16158:1711 189.16493:486 190.16829:81		20339	17711	20005
246	12.673	760.38	188.163	Unknown	[M+H]+		1	FALSE	null	null	null	null	null	null	4		FALSE	null	null	null	null	null	null	null	6.48	PosIDA-1	188.16286:2375 189.16621:512 190.16957:231		38579	40896	25845
247	13.454	807.24	188.163	Unknown	[M+H]+		1	FALSE	null	null	null	null	null	null	4		FALSE	null	null	null	null	null	null	null	9.07	PosIDA-1	188.16292:3288 189.16627:542 190.16963:242		80737	66317	97496
248	1.647	98.82	190.996	w/o MS2:1,3-Dihydro-1,3-dioxo-5-isobenzofurancarboxylic acid	[M+H]+	similar chromatogram in higher mz_855; similar chromatogram in higher mz_1038	0.333	TRUE	null	834.559	C44H75N5O10	Cyclic depsipeptides	LRWWIPZJXHBJSP-UHFFFAOYNA-N	CCC=C(C)C1OC(=O)C(C)N(C)C(=O)C(NC(=O)CN(C)C(=O)C(C(C)CC)N(C)C(=O)C(NC(=O)C(OC(=O)C(C)=CCC(O)C1C)C(C)CC)C(C)C)C(C)C	3		FALSE	null	null	95.6	null	null	null	null	11.32	PosIDA-1	190.99561:1143 191.99896:174 193.00232:246	42.03122:18 57.03007:6 59.05354:6 64.93719:24 71.04581:6 71.04817:6 91.05108:6 105.96252:48 112.08701:5 121.07346:5 135.07727:6 138.01874:12 149.95369:6 149.95885:12 163.04539:6 176.06471:5 191.10674:12	9354	8870	9146
249	0.964	57.84	191.038	6-Hydroxy-7-methoxycoumarin	[M+H]+		1	TRUE	null	293.07	C12H12N4O3S	Benzenesulfonamides	NJIZUWGMNCUKGU-UHFFFAOYSA-N	CC(O)=NC1=CC=C(C=C1)S(=O)(=O)NC1=NC=CC=N1	2		FALSE	null	null	81.3	null	80.1	79.3	50	22.41	PosIDA-1	191.03841:1631 192.04176:477 193.04512:184	80.97456:10 188.98042:10 191.0372:144	11081	11457	11802
250	3.433	205.98	191.081	w/o MS2:5-Methyl-5-phenylhydantoin	[M+H]+		1	TRUE	null	259.06	C14H10O5	Coumarins and derivatives	CEBXXEKPIIDJHL-UHFFFAOYSA-N	CC1=CC(O)=CC2=C1C1=C(C(=O)O2)C(O)=CC(O)=C1	3		FALSE	null	null	100	null	null	null	null	38.57	PosIDA-2	191.08127:2958 192.08462:1264 193.08798:357	64.93394:12 67.05974:10 89.03791:36 91.04726:12 91.05396:83 106.06382:72 111.59635:10 116.05626:24 118.06665:116 134.06081:232 137.02243:10 146.06247:188 155.05057:12 155.05406:24 162.05521:698 173.06718:60 174.0556:84 177.91771:10	24915	23916	25032
251	8.269	496.14	191.117	w/o MS2:Cytisine	[M+H]+		1	TRUE	null	86	C9H14N4O4				3		FALSE	null	null	99.9	null	null	null	null	134.67	PosIDA-3	191.11749:10645 192.12084:2392 193.1242:202	42.03303:24 69.03304:10 91.05372:36 105.96391:24 115.05045:12 117.07037:24 130.06384:189 131.07178:152 138.01537:10 142.06454:24 143.06921:90 150.9444:10 159.06593:154 174.08289:36 174.09213:403	71786	75105	77421
252	2.843	170.58	192.063	L-Kynurenine	[M+H]+	found in higher mz's MsMs_287	1	TRUE	null	293.151	C18H22O2				2		FALSE	null	null	88.4	null	74.2	92.7	88.9	7.33	PosIDA-2	192.06467:1431 193.06802:181 194.07138:24	43.01886:6 46.06395:5 59.04706:2 65.03893:4 67.01825:5 68.99928:12 71.01507:4 77.04075:14 90.04889:2 91.05508:32 92.04937:5 94.06231:19 95.00859:2 99.00703:8 101.04069:2 104.04838:25 105.96249:2 111.01021:12 117.05827:6 118.06333:12 119.04821:13 120.04025:6 122.06458:4 128.05177:21 132.04497:48 138.02036:23 139.00569:8 146.06044:153 148.02112:2 149.02777:2 150.05844:12 156.02263:4 160.04735:2 163…	10918	10867	12463
253	8.671	520.26	193.137	w/o MS2:10-Chloro-1-decanol	[M+H]+	similar chromatogram in higher mz_338; found in higher mz's MsMs_338; similar chromatogram in higher mz_860	1	FALSE	null	301.5	C21H34O4				3		FALSE	null	null	98.4	null	null	null	null	25.21	PosIDA-2	193.13721:2330 194.14056:111 195.14392:273		17385	18082	18748
254	12.422	745.32	193.168	Unknown	[M+H]+		1	TRUE	null	null	null	null	null	null	4		FALSE	null	null	null	null	null	null	null	23.12	PosIDA-1	193.16841:2985 194.17176:2331 195.17512:549	41.04068:12 43.05384:8 53.03789:8 55.05542:32 56.04837:8 59.04817:22 59.06218:8 69.04475:12 70.06696:20 79.05148:4 80.04459:8 81.05779:12 82.06338:20 84.07901:12 85.08888:4 91.04977:8 93.07346:8 94.06508:8 95.0852:8 96.08058:85 97.08666:12 98.09521:12 104.05415:3 107.08282:8 108.08211:16 109.07724:8 110.0946:16 111.10485:27 112.11229:8 117.06287:3 119.05592:8 122.08942:12 124.10744:12 132.0676:4 …	62341	59216	52807
255	6.466	387.96	194.49	Unknown	[M+H]+		0.333	FALSE	null	null	null	null	null	null	4		FALSE	null	null	null	null	null	null	null	253.76	PosIDA-2	194.49019:1049 195.49354:80 196.4969:74		5478	6241	5338
256	6.468	388.08	195.087	Caffeine	[M+H]+		1	TRUE	null	328.142	C36H38N4O8				2	2	FALSE	null	null	94.1	null	87.6	92.4	100	2493.3	PosIDA-2	195.08711:243427 196.09046:37746 197.09382:3439	40.01929:33 41.02625:87 41.03973:10 41.91125:55 41.91851:12 42.0339:16285 42.26881:7 42.29069:7 42.34269:7 42.37281:7 42.46049:7 42.52539:5 42.6114:7 42.65169:7 42.72957:5 42.78643:7 43.0179:48 43.04182:22 44.04865:33 45.03323:53 52.0194:12 53.01228:199 53.87241:5 54.02279:85 54.0331:321 55.02932:10 55.04181:225 55.88253:10 56.04934:2237 57.04377:197 58.02878:10 59.06101:14 66.03336:53 66.82889:7…	1390361	1477456	1344922
257	12.893	773.58	195.12	w/o MS2:Tetraethylene glycol	[M+H]+	found in higher mz's MsMs_619	1	TRUE	null	319.227	C20H32O4				3		FALSE	null	null	97.2	null	null	null	null	15.82	PosIDA-2	195.12033:1762 196.12368:300 197.12704:274	45.03235:48 60.01767:10 81.03128:12 84.05587:12 86.09568:12 91.05112:12 98.098:12 99.102:24 107.07412:12 109.10654:24 113.42727:10 123.08626:12 134.05894:12 149.02956:10 152.05788:24 152.10976:12 166.13814:12 179.12407:10 195.19574:24	24544	24566	28273
258	4.836	290.16	195.12	Tetraethylene glycol	[M+H]+		0.667	TRUE	null	335.222	C20H30O4				2		FALSE	null	null	88.6	null	77.1	86.9	100	17.98	PosIDA-1	195.12044:1993 196.12379:242 197.12715:257	42.0367:12 44.90352:5 45.0333:722 51.01195:2 57.06929:5 68.93177:10 77.04079:7 81.0679:5 84.95571:5 89.05893:181 93.06806:7 95.05103:5 107.06978:5 109.95781:12 111.04575:2 121.06272:5 121.10439:7 133.08327:32 136.05212:5 151.09966:5 160.03326:2 165.06619:7 167.08487:7 176.06479:5 177.07292:5 177.16438:5 180.09953:5 195.0802:7 195.11349:7	12673	14353	11185
259	9.125	547.5	196.133	w/o MS2:N-Heptanoyl-L-homoserine lactone	[M+H]+	similar chromatogram in higher mz_853	1	TRUE	null	148.06	C5H9NO4				2		FALSE	null	null	65.2	null	null	null	null	141.56	PosIDA-2	196.13278:14366 197.13613:3749 198.13949:452	45.03527:127 63.02262:12 65.04023:36 69.0449:24 77.03233:12 84.07919:36 86.09325:36 91.04863:80 91.05398:671 92.06038:85 93.07095:120 95.0854:36 98.09403:48 100.10852:24 104.05151:36 105.07253:75 106.06673:136 107.07434:146 108.0765:48 110.09483:12 115.0538:92 117.06009:138 117.06919:126 118.06364:505 119.07301:492 119.71812:60 120.08052:4737 130.06264:60 132.07915:654 133.08676:677 134.09496:203…	93775	99325	97123
260	0.988	59.28	197.1	w/o MS2:Amastatin	[M+Na]+	adduct linked to 220_[M+H]+	1	FALSE	null	848.581	C47H80NO8P	Phosphatidylcholines	ZOGZAROTKOYYRM-OOCWWCMUNA-N	CCCCCCCCCCCC\C=C/CCC(=O)OCC(COP([O-])(=O)OCC[N+](C)(C)C)OC(=O)CC\C=C/C\C=C/C\C=C/C\C=C/C\C=C/C\C=C/CC	3		FALSE	null	null	100	null	null	null	null	25.4	PosIDA-3	197.10007:1649 198.10342:749 199.10678:207		12644	12294	12878
261	10.848	650.88	197.162	Unknown	[M+H]+		1	TRUE	null	null	null	null	null	null	4		FALSE	null	null	null	null	null	null	null	39.24	PosIDA-1	197.16243:2939 198.16578:2121 199.16914:8250	41.03612:18 41.03791:211 42.03389:12 43.01789:6 55.05428:12 57.07023:6 57.07235:12 61.01904:5 67.0526:12 69.0691:366 71.06462:12 72.08614:12 84.08143:24 86.09552:12 95.08366:12 98.09921:12 101.11388:5 112.07645:944 113.10617:18 126.11185:12 136.08458:6 153.06744:12 182.11285:12 197.16747:102	29326	25471	22682
262	8.269	496.14	198.091	Unknown	[M+H]+	found in higher mz's MsMs_294	1	TRUE	null	null	null	null	null	null	4		FALSE	null	null	null	null	null	null	null	33.03	PosIDA-3	198.09108:1695 199.09443:653 200.09779:86	45.03611:10 69.06688:12 72.07911:12 80.0496:10 95.08518:24 98.09936:12 109.0655:10 111.09151:24 125.10145:12 136.10931:10 152.09933:10 154.06172:36 166.12363:12 168.08147:24 183.0663:48 197.07916:12 198.09238:60 198.16147:24	10623	12218	12532
263	1.057	63.42	198.098	w/o MS2:D-Fructose	[M+H]+		1	FALSE	null	834.601	C48H84NO8P				3		FALSE	null	null	99.9	null	null	null	null	29.33	PosIDA-2	198.09763:1450 199.10098:334 200.10434:62		12606	13456	12632
264	3.194	191.64	199.036	w/o MS2:2,3-Naphthalenedicarboxylic acid	[M+H]+		1	FALSE	null	410	C39H64N7O17P3S				3		FALSE	null	null	94.5	null	null	null	null	29.61	PosIDA-3	199.03564:1544 200.03899:77 201.04235:20		11375	11535	11933
265	4.388	263.28	199.089	w/o MS2:Harmol	[M+H]+	similar chromatogram in higher mz_313; similar chromatogram in higher mz_457; similar chromatogram in higher mz_433; similar chromatogram in higher mz_926; similar chromatogram in higher mz_316; similar chromatogram in higher mz_936; similar chromatogram in higher mz_342; similar chromatogram in higher mz_579; similar chromatogram in higher mz_450	1	FALSE	null	625.214	C28H36O13	Lignan glycosides	WEKCEGQSIIQPAQ-UHFFFAOYNA-N	COC1=CC(=CC(OC)=C1O)C1OCC2C1COC2C1=CC(OC)=C(OC2OC(CO)C(O)C(O)C2O)C(OC)=C1	3		FALSE	null	null	97.3	null	null	null	null	23.66	PosIDA-3	199.08891:1318 200.09226:248 201.09562:146		11253	11162	11131
266	13.104	786.24	199.168	w/o MS2:cis-5-Dodecenoic acid	[M+H]+	similar chromatogram in higher mz_496	1	FALSE	null	101.06	C5H8O2				3		FALSE	null	null	99.6	null	null	null	null	38.28	PosIDA-1	199.16846:19903 200.17181:5648 201.17517:748		330127	318124	300333
267	0.964	57.84	199.989	Unknown	[M+H]+	found in higher mz's MsMs_498	1	FALSE	null	null	null	null	null	null	4		FALSE	null	null	null	null	null	null	null	51.9	PosIDA-2	199.98877:1696 200.99212:307 201.99548:159		10598	10765	10835
268	1.835	110.1	202.106	w/o MS2:Asn-Asn-Arg	[M+H]+	found in higher mz's MsMs_302	1	TRUE	null	311.124	C14H18N2O6				3		FALSE	null	null	100	null	null	null	null	84.77	PosIDA-1	202.10617:11396 203.10952:2258 204.11288:361	43.01805:60 55.0139:12 59.05259:12 67.05515:36 70.0307:36 72.03997:12 73.0265:12 86.09584:10 95.04573:12 95.0553:12 96.08763:12 98.02319:197 102.09244:24 113.05589:12 116.02908:12 121.10614:10 124.07331:77 132.10008:12 142.07664:12 142.08833:60 160.09387:12 167.07611:12 184.09276:24 202.10788:48	85577	81712	83368
269	13.457	807.42	202.178	Unknown	[M+H]+		0.333	FALSE	null	null	null	null	null	null	4		FALSE	null	null	null	null	null	null	null	8.36	PosIDA-1	202.17764:1951 203.18099:601 204.18435:204		43156	30036	25991
270	2.487	149.22	202.18	Unknown	[M+H]+		1	TRUE	null	null	null	null	null	null	4		FALSE	null	null	null	null	null	null	null	817.31	PosIDA-1	202.18022:104367 203.18357:16750 204.18693:1586	41.03889:458 42.03306:332 43.01797:107 43.0428:10 43.05477:152 43.91851:20 44.04871:2641 45.03329:469 53.0379:28 55.05438:211 56.04838:49 57.03221:45 57.06928:1030 57.89434:12 58.0652:514 59.04817:200 60.04483:39 61.8755:24 62.05986:4572 62.36293:5 65.03783:26 67.05388:284 68.04857:22 69.05757:32 69.07156:30 70.06461:24 71.07066:5 72.0446:72 77.03833:7 79.05399:95 80.82565:5 81.06915:715 82.06593…	1149184	1126263	1181482
271	0.988	59.28	203.05	w/o MS2:D-(-)-Tagatose	[M+Na]+	adduct linked to 234_[M+H]+	1	TRUE	null	148.004	C2H7NO3S				2		FALSE	null	null	69.9	null	null	null	null	181.48	PosIDA-3	203.05045:11180 204.0538:1527 205.05716:503	43.053:10 86.01515:10 91.0566:24 103.05394:12 105.07246:36 119.08517:24 121.10455:10 129.06807:12 133.10286:24 146.07259:24 157.0845:12 161.09969:36 202.07388:12 203.05589:91	72440	75789	78658
272	5.474	328.44	203.052	Unknown	[M+Na]+	adduct linked to 235_[M+H]+; found in higher mz's MsMs_685	1	TRUE	null	null	null	null	null	null	4		FALSE	null	null	null	null	null	null	null	64.89	PosIDA-1	203.05214:9346 204.05549:1248 205.05885:144	55.05437:24 99.07825:10 109.10067:10 133.09456:12 145.1028:24 160.08469:12 161.09766:60 203.05159:104 203.14153:24	65217	68410	60353
273	1.103	66.18	203.15	w/o MS2:L-Homoarginine, methyl ester	[M+H]+		1	FALSE	null	584.287	C33H37N5O5				3		FALSE	null	null	100	null	null	null	null	495.74	PosIDA-2	203.15013:74869 204.15348:2688 205.15684:1885		781507	836996	802895
274	3.097	185.82	204.04	Unknown	[M+H]+		1	TRUE	null	null	null	null	null	null	4		FALSE	null	null	null	null	null	null	null	18.1	PosIDA-2	204.04051:1465 205.04386:193 206.04722:276	46.06688:10 114.11697:10 120.08655:12 131.91951:10 147.07085:12 158.03677:10 162.09259:12 186.138:10 204.07225:12	9592	11406	11873
275	1.535	92.1	204.062	w/o MS2:3-Acetamidocoumarin	[M+Na]+	adduct linked to 236_[M+H]+	1	TRUE	null	583.088	C30H18O10	Biflavonoids and polyflavonoids	LADPNODMUXOPRG-UHFFFAOYSA-N	OC1=CC=C(C=C1)C1=CC(=O)C2=C(O1)C(=C(O)C=C2O)C1=C(O)C=C(O)C2=C1OC(=CC2=O)C1=CC=C(O)C=C1	3		FALSE	null	null	94.2	null	null	null	null	30.08	PosIDA-3	204.06206:2473 205.06541:482 206.06877:177	44.04868:5 46.06964:12 57.0311:6 57.03322:18 60.07738:18 60.07956:18 73.06345:6 84.9595:12 85.02802:239 95.08648:12 98.09651:12 98.98188:12 140.9868:6 145.04524:12 204.11789:30	17082	17127	17590
276	3.433	205.98	204.065	w/o MS2:Indole-3-pyruvic acid	[M+H]+		1	TRUE	null	293.3	C24H35N7				2		FALSE	null	null	70.8	null	null	null	null	20.39	PosIDA-2	204.06494:1703 205.06829:679 206.07165:454	57.03125:12 67.054:12 77.04092:24 85.02567:12 103.04827:12 122.06176:10 128.05206:12 130.0658:107 148.07777:10 158.06332:36 167.97093:10 176.05951:12 176.06694:48 204.06038:12 204.14252:24	13037	13405	13634
277	2.325	139.5	204.066	5-Hydroxy-L-tryptophan	[M+H]+	found in higher mz's MsMs_303	1	TRUE	null	343.227	C22H32O4				2		FALSE	null	null	96.8	null	93.3	95.9	100	179.36	PosIDA-3	204.06621:14423 205.06956:3337 206.07292:720	46.06389:7 67.04113:10 77.03819:29 78.04339:5 79.05385:38 84.96072:14 89.03891:12 90.04745:5 91.05497:7 103.0536:92 104.04682:10 105.07068:44 106.06344:153 107.05071:69 115.05185:89 116.04678:160 117.05963:52 128.04843:10 130.06212:90 131.04918:82 131.07166:10 132.07864:29 133.05064:27 134.0587:649 138.98897:2 140.04744:10 142.0594:12 143.07076:12 144.04868:7 148.07895:7 157.0506:7 158.05922:178 …	124015	124267	125281
278	8.269	496.14	204.102	w/o MS2:7-Dimethylamino-4-methylcoumarin	[M+H]+		1	FALSE	null	289.121	C15H17ClN4	Chlorobenzenes	HZJKXKUJVSEEFU-UHFFFAOYNA-N	CCCCC(CN1C=NC=N1)(C#N)C1=CC=C(Cl)C=C1	3		FALSE	null	null	99.9	null	null	null	null	27.02	PosIDA-3	204.10234:2277 205.10569:969 206.10905:731		14459	16431	16761
279	1.08	64.8	204.123	Acetyl-L-carnitine	[M+H]+	found in higher mz's MsMs_734	1	TRUE	null	646.15	C25H27N9O8S2				2	2	FALSE	null	null	94.6	null	89.3	91.6	100	3718.78	PosIDA-2	204.12292:304768 205.12627:55035 206.12963:7270	41.03898:359 42.03406:82 43.01806:5541 44.04974:1092 44.9967:118 45.05692:708 46.06502:556 47.06887:60 57.03339:4921 58.06425:1406 59.07201:721 59.9016:73 60.08082:16675 61.02805:78 64.97691:10 70.06593:541 71.06845:476 72.06261:86 75.40402:10 82.06863:12 84.08176:2437 84.77243:598 84.95717:24 84.99078:36 85.02828:243308 85.41407:48 85.4374:62 85.46462:66 85.48926:70 85.52427:69 85.55151:48 85.56…	2516621	2694551	2568121
280	12.673	760.38	205.085	4-Ethoxy-7-methylcoumarin	[M+H]+		1	TRUE	null	219.078	C11H12N2O3	Serotonins	LDCYZAJDBXYCGN-UHFFFAOYNA-N	NC(CC1=CNC2=C1C=C(O)C=C2)C(O)=O	2		FALSE	null	null	86.1	null	66.7	87.7	100	422.38	PosIDA-3	205.08534:103273 206.08869:24878 207.09205:2994	57.06609:24 57.06927:128 64.84231:12 65.03895:209 91.05511:10 93.03151:378 95.08929:24 121.01947:24 121.03027:606 149.02267:2815 177.13257:24 205.16925:24	1072183	1145216	757378
281	4.472	268.32	205.096	w/o MS2:N-Acetylprocainamide	[M+H]+		1	FALSE	5.92	495.26	C26H40O9	NA			3		FALSE	null	null	99	null	null	null	null	13.89	PosIDA-2	205.09581:5129 206.09916:1097 207.10252:225		42113	53926	66105
282	10.035	602.1	206.066	w/o MS2:DL-.alpha.-Lipoamide	[M+H]+	similar chromatogram in higher mz_871	1	TRUE	null	172.043	C7H9NO2S				3		FALSE	null	null	99.9	null	null	null	null	28.41	PosIDA-1	206.06628:2392 207.06963:701 208.07299:600	43.01791:8 59.04593:8 59.99042:355 88.0203:625 88.57376:8 116.05286:574 122.09701:8 131.0701:8 148.01929:8 149.0208:8 150.02396:12 176.13896:4 206.0659:45 206.15047:8 206.19073:8	15158	15767	14272
283	1.462	87.72	207.031	w/o MS2:Fraxetin	[M+H]+		0.333	FALSE	null	261.023	C9H13BrN2O2	Halopyrimidines	CTSLUCNDVMMDHG-UHFFFAOYNA-N	CCC(C)N1C(O)=NC(C)=C(Br)C1=O	3		FALSE	null	null	98.8	null	null	null	null	8.13	PosIDA-3	207.03148:5320 208.03483:1130 209.03819:794		26855	31399	158989
284	1.39	83.4	207.032	Unknown	[M+H]+		0.667	FALSE	null	null	null	null	null	null	4		FALSE	null	null	null	null	null	null	null	7.18	PosIDA-1	207.0316:5012 208.03495:885 209.03831:878		146739	146458	32621
285	0.918	55.08	207.032	Unknown	[M+H]+		0.333	FALSE	null	null	null	null	null	null	4		FALSE	null	null	null	null	null	null	null	5.84	PosIDA-3	207.03197:4832 208.03532:1235 209.03868:787		70034	76300	83381
286	10.947	656.82	207.032	Unknown	[M+H]+	found in higher mz's MsMs_306; similar chromatogram in higher mz_306	1	TRUE	null	null	null	null	null	null	4		FALSE	null	null	null	null	null	null	null	11.79	PosIDA-1	207.03183:3493 208.03518:1160 209.03854:738	45.03045:12 55.05227:12 67.05154:12 82.0608:12 86.09434:12 93.07342:12 107.07116:12 109.09917:12 118.99773:36 133.01039:12 147.06721:12 149.09283:24 151.12715:24 162.13519:24 164.98323:24 191.00011:36 192.08893:24 207.01535:12 207.03554:60 207.17882:36	43835	37365	52353
287	2.837	170.22	209.091	L-Kynurenine	[M+H]+		0.667	TRUE	null	324.207	C20H25N3O				2	2	FALSE	null	null	93.1	null	88.3	96.3	81.8	11.15	PosIDA-1	209.09299:1096 210.09634:185 211.0997:136	46.03161:24 69.03426:10 71.01511:24 74.02322:206 77.03709:48 91.04844:48 91.05246:227 92.04539:71 94.06509:555 97.33556:10 99.0057:36 104.04844:36 109.10654:12 117.0553:48 118.0634:479 120.0434:357 121.10283:24 125.06385:10 128.04709:60 129.37875:10 132.04826:169 136.07501:206 146.05713:641 150.05338:48 157.01926:10 164.06953:60 174.05161:169 192.06377:60 192.9861:24 209.13139:24	8649	8370	9396
288	1.034	62.04	210.086	w/o MS2:L-Carnosine	[M+H]+		1	TRUE	null	183.1	C18H34O3				3		FALSE	null	null	99.4	null	null	null	null	13.03	PosIDA-1	210.08623:1156 211.08958:347 212.09294:73	44.04973:10 55.01807:12 57.03232:24 85.03085:10 105.06964:10 110.07128:24 111.0164:24 129.01239:12 137.05367:10 139.00273:86 147.03017:10 164.08423:24 175.02463:12 194.08876:36 194.09657:120 210.12469:36	9427	8924	8632
289	12.476	748.56	211.107	w/o MS2:Aprobarbital	[M+H]+		1	TRUE	null	369.16	C18H34OSn				3		FALSE	null	null	100	null	null	null	null	32.47	PosIDA-2	211.10748:2329 212.11083:321 213.11419:236	43.05295:24 55.05025:12 68.97955:12 70.06348:12 82.0647:12 84.08678:36 96.08751:12 98.09944:24 105.0278:12 106.06369:10 110.01375:24 111.09753:24 113.11241:24 124.11377:10 135.09859:12 136.11272:24 151.13075:10 155.08182:24 157.15468:10 169.10313:24 181.10411:10 195.10378:12 196.11781:12 211.18279:60	15013	17826	16443
290	10.52	631.2	211.178	Unknown	[M+H]+		1	FALSE	null	null	null	null	null	null	4		FALSE	null	null	null	null	null	null	null	32.31	PosIDA-1	211.17821:2788 212.18156:2026 213.18492:489		18183	22142	22552
291	1.003	60.18	213.015	w/o MS2:Chromone-3-carboxylic acid	[M+H]+		1	TRUE	null	659.138	C29H34O15	Isoflavonoid O-glycosides	NGUSMSQYMDPBGF-UHFFFAOYNA-N	COC1=CC=C(C=C1)C1=COC2=C(C1=O)C(OC1OC(CO)C(O)C(O)C1OC1OCC(O)C(O)C1O)=CC(OC)=C2OC	2		FALSE	null	null	66.4	null	null	null	null	41.15	PosIDA-3	213.01494:2675 214.01829:1359 215.02165:941	43.05208:10 83.08936:10 88.07977:24 95.08808:12 97.02879:24 111.04885:10 129.06967:10 139.03572:12 154.06024:12 157.05112:12 169.09781:12 197.05981:10 213.14392:24	27103	26922	27366
292	14.828	889.68	215.015	w/o MS2:D-Saccharic acid 1,4-lactone	[M+H]+		1	TRUE	null	618.487	C34H70NO6P				3		FALSE	null	null	99.4	null	null	null	null	38.37	PosIDA-2	215.01512:3779 216.01847:289 217.02183:73	43.01615:12 57.00047:10 78.03613:12 87.08619:10 107.04515:10 123.04742:12 169.08853:10 180.06383:12 186.82539:10 198.0728:24 198.0807:12	56994	52503	51548
293	8.269	496.14	215.116	w/o MS2:N-.alpha.-Acetyl-L-arginine	[M+H]+		1	FALSE	null	309.043	C14H12O6S				3		FALSE	null	null	99.3	null	null	null	null	14.4	PosIDA-2	215.11615:1463 216.1195:30867 217.12286:20591		10375	10855	10563
294	8.269	496.14	216.102	w/o MS2:Atrazine	[M+H]+		1	TRUE	null	193.051	C10H13NO4				2		FALSE	null	null	73.4	null	null	null	null	1000.7	PosIDA-3	216.10162:62325 217.10497:22242 218.10833:2309	43.01702:748 91.05372:24 103.0537:24 111.0752:12 115.04143:12 115.05347:60 117.06278:24 127.05392:36 128.06125:48 130.05905:36 130.06544:338 131.07018:185 140.04425:36 142.06454:60 143.07425:137 144.07742:48 145.09085:24 147.08246:24 153.06932:24 154.06685:150 155.07111:197 156.08212:36 158.06114:217 159.0677:768 160.07922:24 167.07021:36 170.09456:36 172.07742:36 173.08331:251 174.09029:1268 180…	403541	444259	446946
295	11.148	668.88	216.137	w/o MS2:Lys-Ser	[M+H]+	similar chromatogram in higher mz_915	1	TRUE	null	402.268	C21H41NO4S				3		FALSE	null	null	97.1	null	null	null	null	21.82	PosIDA-3	216.13673:1425 217.14008:604 218.14344:148	43.01988:24 55.05551:36 58.06636:24 67.05283:24 70.0659:24 89.03259:10 93.05466:24 95.08808:48 98.09537:12 112.10949:60 124.0842:12 126.1296:60 158.06328:12 158.09677:24 172.076:60 181.06464:10 184.17259:36 186.08833:12 187.09785:24 216.14153:121	9604	9038	9529
296	5.128	307.68	216.195	Unknown	[M+H]+		1	TRUE	null	null	null	null	null	null	4		FALSE	null	null	null	null	null	null	null	182.66	PosIDA-1	216.19453:4748 217.19788:1056 218.20124:80	41.03889:36 42.03306:14 43.01889:22 43.05384:10 44.04964:363 45.03329:33 46.06397:5 55.05438:27 57.06928:84 58.06413:13 59.04817:68 65.03557:4 67.05388:16 69.06806:4 70.06461:4 72.04341:5 74.05942:5 76.07634:286 77.03956:5 79.05648:6 81.07168:48 82.06339:2 83.04833:21 83.0854:14 84.0803:210 85.06302:106 89.05759:4 91.05513:4 93.06805:4 95.08657:9 99.08385:2 101.05907:5 102.09367:10 105.06943:4 11…	31659	28831	31085
297	14.721	883.26	217.107	w/o MS2:3-Oxo-1,8-octanedicarboxylic acid	[M+H]+		0.333	FALSE	null	218.951	C7H6ClNO4S				3		FALSE	null	null	100	null	null	null	null	5.21	PosIDA-2	217.10709:7302 218.11044:803 219.1138:203		148585	192527	161855
298	9.164	549.84	218.21	w/o MS2:Dodecanoic acid	[M+H]+	similar chromatogram in higher mz_607; similar chromatogram in higher mz_799	0.667	TRUE	null	313.191	C19H24N2O2				3		FALSE	null	null	98.2	null	null	null	null	85.95	PosIDA-1	218.20961:1161 219.21296:235 220.21632:41	43.05384:18 45.03517:18 55.02004:6 57.06927:24 70.06695:24 83.04832:24 85.10311:5 88.07436:24 102.09365:18 111.03981:6 112.04696:24 136.91714:12 156.0735:24 174.08118:12 174.18666:12 200.20007:12 218.21405:160	10718	9539	10724
299	5.474	328.44	219.027	w/o MS2:O-(Carbomethoxy)salicylic acid	[M+H]+		1	TRUE	null	115.123	C6H17N3				3		FALSE	null	null	100	null	null	null	null	58.43	PosIDA-1	219.02652:3170 220.02987:338 221.03323:305	81.06662:12 91.0511:12 93.07075:12 101.97324:12 116.92786:10 119.08498:48 130.07994:12 133.10103:79 141.07019:12 145.1028:24 161.09587:24 170.11116:24 182.38579:10 203.13353:24 203.14752:85 219.17426:186	23371	23322	22265
300	0.972	58.32	219.083	w/o MS2:Pro-Cys	[M+H]+		1	FALSE	null	341.203	C22H29OP				3		FALSE	null	null	96.3	null	null	null	null	7.04	PosIDA-3	219.08255:1243 220.0859:155 221.08926:1891		7896	8152	8697
301	1.535	92.1	220.034	w/o MS2:Chlorazanil	[M+H]+		1	TRUE	null	444.132	C22H22ClN3O5				3		FALSE	null	null	85.8	null	null	null	null	14.36	PosIDA-1	220.03397:1289 221.03732:212 222.04068:200	57.0713:12 91.05364:18 103.05219:6 105.06926:24 115.05488:18 119.08481:6 121.06251:12 122.10318:18 129.07086:12 130.07974:18 132.99406:12 135.11784:18 145.0992:24 149.0276:12 149.09439:12 162.10464:12 174.02911:12 177.1174:12 177.1286:58 189.12262:12 204.14383:30 205.15695:286 220.11543:18 220.18201:99	9101	9568	9121
302	1.835	110.1	220.118	Pantothenic acid	[M+H]+	adduct linked to 329_[M+Na]+	1	TRUE	null	142.1	C8H11ClN2O4S2				2	2	FALSE	null	null	96.9	null	94.1	96.4	97	1043.77	PosIDA-1	220.11752:93439 221.12087:16399 222.12423:2472	41.03896:1283 42.03495:241 43.01805:3131 45.03337:805 47.01115:60 55.01702:501 55.05448:240 56.01279:196 57.06939:1395 59.04828:972 61.02913:48 65.03795:137 67.054:989 68.04985:36 69.07052:545 70.02718:1408 72.04354:3425 73.02769:443 74.02456:140 77.03355:12 79.05289:70 81.05415:60 81.06931:207 83.04848:188 84.08046:36 85.06447:1437 86.09584:254 87.07845:207 89.78049:60 90.05443:13102 94.06254:48…	708345	700116	703604
303	2.325	139.5	221.09	5-Hydroxy-L-tryptophan	[M+H]+	adduct linked to 333_[M+Na]+	1	TRUE	null	349.238	C21H34O4				2	2	FALSE	null	null	94.6	null	90	94.6	100	24.17	PosIDA-3	221.08977:5338 222.09312:1006 223.09648:549	41.03883:18 55.05326:24 57.06919:24 59.05132:18 73.04663:73 74.0219:30 77.03698:18 79.05262:46 81.06776:24 89.03364:12 89.03761:24 91.04964:18 91.05365:51 93.06791:51 99.95247:6 103.05505:147 104.04684:12 105.06207:24 105.0707:69 106.0649:369 107.04928:157 107.08266:24 109.10344:18 111.07216:6 115.05489:279 116.04982:316 117.05511:176 118.06778:12 120.07854:30 123.0845:24 130.06535:223 131.04921:…	70660	69439	69390
304	3.434	206.04	221.09	w/o MS2:5-Hydroxy-L-tryptophan	[M+H]+		0.333	TRUE	null	303.232	C20H32O3				2		FALSE	null	null	62.4	null	null	null	null	5.92	PosIDA-2	221.0905:2552 222.09385:554 223.09721:433	43.05669:24 55.0524:12 59.04935:24 71.04715:10 73.04807:72 91.05128:12 100.97186:10 103.05682:60 105.06674:36 107.08737:36 109.10234:48 115.05227:24 117.06612:24 118.06818:12 121.06138:36 128.0473:24 130.0674:468 132.08395:24 133.10291:36 137.09796:36 147.06755:24 158.0598:301 161.09262:60 164.06802:24 176.0688:348 191.08:12 192.06604:36 204.06638:98 206.16321:24 221.0743:24	27789	29744	28245
305	12.237	734.22	221.115	w/o MS2:His-Glu-Arg	[M+H]+	found in higher mz's MsMs_468	1	TRUE	null	363.177	C16H22N6O4				3		FALSE	null	null	99.6	null	null	null	null	9.01	PosIDA-1	221.11478:2021 222.11813:642 223.12149:265	43.05565:24 70.05046:10 79.05267:10 93.06527:12 101.02657:10 110.09304:12 117.05975:10 133.09932:24 138.13237:24 146.07227:12 157.07185:10 161.10109:36 162.12799:10 164.14664:24 175.12617:12 179.0864:12 191.064:12 191.09308:12 192.17828:36 195.86232:10 206.1828:24 217.38191:24 218.91881:12 219.54173:24 221.07788:48 221.10081:24 221.203:24	24429	22483	15624
306	10.94	656.4	223.063	Cyclotrisiloxane, hexamethyl-	[M+H]+		1	TRUE	null	216.032	C8H9NO4S	Benzoic acid esters	VSOOBQALJVLTBH-UHFFFAOYSA-N	COC(=O)C1=CC=CC=C1S(N)(=O)=O	2		FALSE	null	null	83.9	null	82.2	74.5	60	24.63	PosIDA-2	223.06293:9412 224.06628:4289 225.06964:2783	42.03492:24 45.01546:24 60.48253:10 72.08039:12 73.04681:89 77.04087:10 81.06798:24 84.07911:24 93.02757:12 93.03162:36 96.08344:10 110.09472:24 119.00097:48 121.02735:88 133.0106:48 148.99548:12 149.02458:398 162.96863:94 164.98349:60 175.97565:48 177.06003:36 189.01128:36 190.99846:747 194.17064:60 195.11955:24 207.02576:898 207.03181:2338 209.00995:24 223.04897:12 223.06361:48	101242	103676	106476
307	0.918	55.08	223.063	Unknown	[M+H]+		0.333	FALSE	null	null	null	null	null	null	4		FALSE	null	null	null	null	null	null	null	8.66	PosIDA-3	223.0627:11266 224.06605:2819 225.06941:1433		69029	70557	178157
308	1.403	84.18	223.063	w/o MS2:Cyclotrisiloxane, hexamethyl-	[M+H]+		1	FALSE	null	258.037	C11H6F3NO3				3		FALSE	null	null	99.7	null	null	null	null	14.78	PosIDA-3	223.06284:12138 224.06619:2792 225.06955:1688		400852	335537	401565
309	12.095	725.7	223.063	Unknown	[M+H]+		1	TRUE	null	null	null	null	null	null	4		FALSE	null	null	null	null	null	null	null	14.51	PosIDA-1	223.063:6264 224.06635:2429 225.06971:1449	65.03562:12 70.05997:12 73.0468:36 84.08038:24 87.94815:10 98.09391:24 107.09017:24 110.09911:36 112.10793:24 118.99177:12 121.02578:122 126.12794:24 133.01057:24 149.02626:327 151.1308:24 155.08186:24 162.9686:24 164.98344:48 175.9812:24 189.02089:36 191.0023:506 194.16278:36 207.02975:950 209.00787:24 211.31126:10 223.06358:60	73539	66193	61275
310	0.941	56.46	225.015	Unknown	[M+H]+		1	TRUE	null	null	null	null	null	null	4		FALSE	null	null	null	null	null	null	null	25.97	PosIDA-1	225.01494:4068 226.01829:566 227.02165:292	43.01706:313 51.02298:36 53.03893:60 55.01902:48 69.03429:87 73.04317:36 77.03712:12 77.04081:36 80.97198:24 81.0313:121 83.01385:24 91.05248:24 97.02729:36 98.9848:118 99.04062:60 105.03353:180 109.02164:12 109.02749:312 120.97481:12 124.12312:10 127.03826:607 137.02716:12 147.04523:60 150.03108:24 155.08702:48 165.06804:36 169.10127:24 177.97731:24 183.11766:24 190.99638:76 192.00552:36 192.997…	32244	32819	34019
311	10.978	658.68	225.196	w/o MS2:1,3-Dicyclohexylurea	[M+H]+		1	FALSE	null	465.103	C21H20O12	Flavonoid-3-O-glycosides	DCYOADKBABEMIQ-UHFFFAOYNA-N	CC1OC(OC2=C(OC3=CC(O)=CC(O)=C3C2=O)C2=CC(O)=C(O)C(O)=C2)C(O)C(O)C1O	3		FALSE	null	null	99.9	null	null	null	null	8.76	PosIDA-1	225.19565:1841 226.199:1802 227.20236:302		21857	22846	16668
312	9.522	571.32	226.18	Unknown	[M+H]+		1	TRUE	null	null	null	null	null	null	4		FALSE	null	null	null	null	null	null	null	11.31	PosIDA-1	226.1799:1991 227.18325:920 228.18661:384	42.03311:28 43.05389:8 45.03334:35 55.01699:4 55.05548:39 56.04949:12 58.06205:16 65.03903:4 67.05625:8 69.06931:16 70.06469:16 72.07921:12 73.0672:8 79.04909:4 82.0622:16 84.07911:16 85.0657:26 88.0758:12 89.0577:8 93.05463:8 94.06519:12 96.07794:16 96.08344:16 97.09784:16 98.09811:20 99.07838:20 100.10843:12 102.09095:8 105.03074:8 106.03776:4 108.0764:8 109.10081:8 110.09473:16 113.09309:12 11…	18043	18014	29239
313	4.388	263.28	227.085	w/o MS2:Genipin	[M+H]+	found in higher mz's MsMs_344; found in higher mz's MsMs_869; found in higher mz's MsMs_936; found in higher mz's MsMs_457; found in higher mz's MsMs_579; found in higher mz's MsMs_450	1	TRUE	null	188.104	C7H15N3O3				2		FALSE	null	null	65.9	null	null	null	null	1408.72	PosIDA-3	227.08481:215391 228.08816:40952 229.09152:18744	42.03207:24 44.97864:83 55.05427:105 56.05141:60 57.99137:12 58.99526:48 61.01136:48 61.04094:105 67.05604:173 69.07025:36 74.00738:36 76.02115:118 77.0394:36 79.04758:12 79.05382:258 81.06646:99 82.02637:126 83.04944:48 85.00852:163 86.01354:12 89.04285:12 91.05093:120 93.06786:60 95.08637:60 97.01186:456 97.03949:2104 98.0964:80 99.02642:118 99.05852:68 100.02112:160 101.99995:98 103.05357:48 1…	1623333	1577400	1676669
314	1.034	62.04	227.113	L-Carnosine	[M+H]+	adduct linked to 353_[M+Na]+	1	TRUE	null	677.4	C42H78N2O14				2	2	FALSE	null	null	97.3	null	94.9	95.9	100	34.62	PosIDA-1	227.11313:5078 228.11648:1000 229.11984:127	83.05861:174 93.04511:396 95.05518:60 95.06065:329 110.07113:3362 111.05762:36 122.06471:48 122.07091:489 136.08163:36 142.00291:10 146.07246:48 152.06834:12 152.077:107 156.07536:846 164.0804:251 180.07515:48 181.106:216 185.37148:10 192.07555:60 210.09187:244 227.11363:60	40288	41784	41157
315	14.744	884.64	229.032	Unknown	[M+H]+		0.333	FALSE	null	null	null	null	null	null	4		FALSE	null	null	null	null	null	null	null	30.41	PosIDA-2	229.03156:1293 230.03491:119 231.03827:27		16779	17638	16166
316	4.388	263.28	229.08	w/o MS2:Uridine, 2'-deoxy-	[M+H]+		1	FALSE	null	287.055	C15H10O6				3		FALSE	null	null	97.8	null	null	null	null	144.83	PosIDA-3	229.07977:10501 230.08312:1708 231.08648:265		78031	77089	80570
317	10.392	623.52	231.076	w/o MS2:Phenobarbital	[M+H]+		0.667	TRUE	null	147.117	C11H17N				3		FALSE	null	null	98.3	null	null	null	null	14.4	PosIDA-3	231.07562:1266 232.07897:190 233.08233:12	43.05759:10 77.03228:12 77.03844:445 95.04568:12 95.04842:36 97.10201:24 98.9863:36 128.95816:24 135.08076:12 140.99712:36 157.00365:60 171.10788:24 175.01894:961 203.05386:24 215.08307:12	14098	15794	15421
318	11.171	670.26	232.17	w/o MS2:Alprenolol	[M+H]+		1	TRUE	null	384.076	C18H19Cl2NO4				3		FALSE	null	null	99.9	null	null	null	null	36.91	PosIDA-1	232.1701:2342 233.17345:915 234.17681:175	57.06927:18 77.03462:12 78.04103:12 91.0511:18 92.06689:6 106.06361:24 117.05679:58 118.06338:138 119.08957:12 130.06395:30 132.08047:381 134.09302:12 144.08426:76 145.08589:66 146.09608:12 157.08426:12 158.09653:57 159.10497:55 173.60043:12 174.12558:1346 176.10568:12 217.15674:5 232.16908:87	17622	18970	16802
319	8.269	496.14	232.414	Unknown	[M+H]+		1	TRUE	null	null	null	null	null	null	4		FALSE	null	null	null	null	null	null	null	766.74	PosIDA-1	232.41161:2424 233.41496:198 234.41832:99	43.018:407 44.05061:48 60.04379:12 69.07044:12 77.03716:30 78.04482:30 81.05659:18 86.05932:316 89.03914:50 90.04501:18 91.0552:338 101.03801:12 102.04699:24 103.05386:202 104.04995:93 104.06283:118 105.05657:320 107.04663:99 108.05741:91 114.04803:24 115.05366:1514 116.04556:126 117.05691:379 117.06753:819 118.05891:30 118.06501:163 119.08662:48 120.04195:12 121.06281:47 127.05413:292 128.05194:…	17589	19235	18187
320	8.269	496.14	233.129	w/o MS2:Melatonin	[M+H]+	found in higher mz's MsMs_580; found in higher mz's MsMs_411; found in higher mz's MsMs_835	1	TRUE	null	834.529	C46H78NO10P				2	1	FALSE	null	null	71.8	null	null	null	null	9861.46	PosIDA-2	233.12881:676491 234.13216:163470 235.13552:16444	41.03896:36 42.03313:36 43.01804:1660 44.04878:312 47.85333:24 51.02505:48 53.039:36 56.04952:134 60.04166:60 64.03191:12 77.03844:289 78.04612:267 79.0404:36 79.05536:48 81.05666:213 86.05939:1727 86.43317:24 88.02846:36 89.04053:850 90.04509:186 91.05393:3385 91.88549:24 93.05602:24 94.02987:24 101.03667:75 102.03149:48 102.04848:162 102.74241:24 103.05395:2614 104.04717:1050 104.06004:949 105.…	4553751	4896426	4763704
321	12.26	735.6	235.169	w/o MS2:2,6-Di-tert-butyl-4-methoxyphenol	[M+H]+		1	TRUE	null	269.117	C17H16O3				3		FALSE	null	null	98.7	null	null	null	null	10	PosIDA-1	235.16881:2777 236.17216:695 237.17552:549	55.05641:12 57.07135:204 86.093:10 101.05617:36 105.06934:12 109.09473:12 150.1254:12 155.06937:12 179.10892:154 194.19373:24 206.19489:24 218.10619:24 219.13881:24 235.1787:367 235.21741:24	31139	31678	22931
322	11.956	717.36	237.112	w/o MS2:L-Homoserine	[M+H]+	similar chromatogram in higher mz_727; found in higher mz's MsMs_727	1	TRUE	null	133.065	C9H10O2				3		FALSE	null	null	95.8	null	null	null	null	68.61	PosIDA-3	237.11214:5376 238.11549:1557 239.11885:305	56.04834:12 71.07061:10 73.04788:36 84.08281:24 91.05104:24 91.05506:218 93.06663:12 98.09514:24 109.10059:24 111.09441:24 117.06582:12 119.04817:193 124.11359:24 126.12773:24 147.06546:36 161.13669:12 165.13811:24 169.10106:12 181.10762:24 208.17709:36 221.09038:24 222.11957:12 237.20027:36	39477	41182	42117
323	7.68	460.8	237.124	w/o MS2:Carbetamide	[M+H]+		1	TRUE	null	367.3	C20H38N6O4				3		FALSE	null	null	100	null	null	null	null	45.84	PosIDA-2	237.12357:3349 238.12692:739 239.13028:203	41.03981:4 43.05478:8 46.06684:8 55.0159:12 57.06824:20 59.04496:4 72.04462:30 73.04556:44 86.06058:4 88.08099:3 91.05516:8 93.06403:8 98.0897:4 103.05097:4 105.06947:8 108.05737:8 112.10788:4 114.05397:63 117.05685:8 121.03189:8 124.07313:12 125.05918:20 129.05678:4 132.04185:8 135.0415:4 136.07343:123 139.10834:4 139.12488:8 143.05093:3 145.05219:8 147.06393:24 152.91859:4 155.08876:16 159.1121…	21001	23397	24272
324	12.561	753.66	239.069	w/o MS2:4,2'-Dihydroxychalcone	[M+H]+	similar chromatogram in higher mz_614	1	TRUE	null	241.1	C27H46O3				2		FALSE	null	null	65.6	null	null	null	null	45.36	PosIDA-2	239.06863:3231 240.07198:901 241.07534:215	43.05567:10 59.06108:12 72.08148:12 84.08027:24 91.05108:24 95.0838:24 99.04055:10 112.10631:12 115.05352:10 119.08036:12 122.09868:10 133.06702:10 136.11095:12 139.13802:10 149.06032:12 154.07738:24 160.08997:10 167.07755:12 169.10297:36 175.07986:10 178.15121:12 179.93198:12 183.10614:12 193.01718:12 197.12837:12 210.13841:12 224.07819:10 239.10703:24	22528	24269	20250
325	5.662	339.72	239.147	w/o MS2:N.omega.-Propyl-L-arginine	[M+H]+		1	TRUE	null	106.086	C4H11NO2				3		FALSE	null	null	99.9	null	null	null	null	94.15	PosIDA-2	239.14729:6475 240.15064:965 241.154:194	45.03433:637 73.0481:36 80.75018:10 89.05779:220 107.06709:12 129.07454:10 133.08191:90 153.05937:10 177.11247:12 183.12556:24 203.91623:10 239.17702:24	67123	65314	58512
326	11.719	703.14	240.23	w/o MS2:D-erythro-Sphingosine C-15	[M+H]+		1	FALSE	null	265.1	C23H36O7				3		FALSE	null	null	97.7	null	null	null	null	18.88	PosIDA-3	240.23003:1235 241.23338:657 242.23674:437		8306	9579	9178
327	1.08	64.8	241.129	w/o MS2:.beta.-Ala-3-methyl-His	[M+H]+	similar chromatogram in higher mz_642; similar chromatogram in higher mz_684; similar chromatogram in higher mz_734; similar chromatogram in higher mz_769	1	TRUE	null	104.035	C3H7NO3				3		FALSE	null	null	99.9	null	null	null	null	329.42	PosIDA-2	241.12898:26969 242.13233:8891 243.13569:1066	41.03988:48 42.03679:48 54.03536:36 58.06532:24 67.03909:24 68.04871:318 70.06476:12 72.04475:100 81.04281:36 83.06257:108 89.06705:24 95.06079:729 96.06841:1238 97.0772:654 99.05335:24 107.06419:83 109.07601:5019 110.06982:48 111.05335:48 112.0383:48 115.0854:48 121.07685:36 124.08584:381 125.07352:135 126.10291:1347 133.08191:24 135.05968:126 135.07109:12 138.09981:36 143.08809:12 150.10007:250…	194760	211143	201487
328	13.446	806.76	241.181	w/o MS2:Tetradecanedioic acid	[M+H]+		1	TRUE	null	108.081	C7H9N				3		FALSE	null	null	99.6	null	null	null	null	440.24	PosIDA-2	241.18063:36470 242.18398:10581 243.18734:1706	44.04878:12 58.06421:24 60.04383:10 81.05538:12 85.06702:24 89.07361:12 97.08128:12 100.07759:24 106.06378:10 111.08875:12 122.09426:12 130.12173:10 135.08241:12 137.10284:12 140.12259:24 143.08968:24 148.10844:10 159.09637:12 171.11523:10 185.11969:12 195.08829:10 196.96141:12 199.16:10 208.04001:36 209.15805:12 213.99034:12 241.18504:24	444975	439419	414215
329	1.835	110.1	242.099	w/o MS2:Pantothenic acid	[M+Na]+	adduct linked to 302_[M+H]+; found in higher mz's MsMs_832	1	TRUE	null	131.071	C6H12O3				2		FALSE	null	null	60	null	null	null	null	421.3	PosIDA-1	242.09865:15124 243.102:2959 244.10536:572	91.05664:12 109.0672:12 112.04124:60 121.06602:36 137.09633:10 149.09148:24 153.04892:36 186.09032:10 209.02634:12 211.02005:12 224.09128:60 242.10292:765	108907	104183	107174
330	10.533	631.98	242.175	w/o MS2:N-Nonanoyl-L-homoserine lactone	[M+H]+		0.667	TRUE	null	323.029	C9H13N2O9P				2		FALSE	null	null	68.7	null	null	null	null	30.44	PosIDA-1	242.17242:1105 243.17577:409 244.17913:93	42.03572:5 46.0658:7 55.0543:5 57.03424:7 59.05671:7 67.05608:5 69.07146:5 70.06686:7 72.07902:7 73.06461:5 77.03944:5 79.05761:5 82.06453:5 83.04182:5 87.07948:5 91.05232:19 93.06657:7 95.08233:12 96.08456:7 98.09647:10 105.03334:5 107.04784:7 109.07269:5 110.09297:5 112.07947:2 119.08789:5 121.06099:15 121.06561:21 138.12569:60 139.1147:5 142.12297:5 149.09612:18 152.14932:5 156.13461:7 192.995…	6677	7444	8436
331	11.727	703.62	242.19	w/o MS2:Lys-Leu	[M+H]+	similar chromatogram in higher mz_746; similar chromatogram in higher mz_829; similar chromatogram in higher mz_848; similar chromatogram in higher mz_783; similar chromatogram in higher mz_967; similar chromatogram in higher mz_866; similar chromatogram in higher mz_447; found in higher mz's MsMs_447; similar chromatogram in higher mz_986; similar chromatogram in higher mz_826; similar chromatog…	1	TRUE	null	404.283	C21H41NO4S				3		FALSE	null	null	92.8	null	null	null	null	104.29	PosIDA-2	242.19017:3759 243.19352:2199 244.19688:283	45.03326:12 57.0703:12 61.03335:10 82.06841:10 95.0824:24 107.04647:10 109.06252:12 121.0657:12 130.94339:10 143.07594:12 158.11053:24 170.10374:12 184.1075:12 196.95901:12 209.02376:12 210.19119:24 214.16017:24 229.01088:10 242.19394:48 242.28123:48	26640	26083	33094
332	0.941	56.46	243.025	D-Mannose 6-phosphate	[M+H]+		1	TRUE	null	254.059	C10H11N3O3S	Aminobenzenesulfonamides	JLKIGFTWXXRPMT-UHFFFAOYSA-N	CC1=CC(NS(=O)(=O)C2=CC=C(N)C=C2)=NO1	2		FALSE	null	null	86.6	null	85.2	82.3	63.6	42.48	PosIDA-2	243.02469:6320 244.02804:754 245.0314:140	43.01614:36 45.03424:12 53.03893:60 62.96574:10 69.03311:48 73.02398:12 80.97449:48 81.03255:231 85.02682:60 98.98199:647 99.042:24 109.02894:782 119.08656:24 122.98984:10 127.03667:174	49727	50570	52535
333	2.325	139.5	243.073	w/o MS2:2-Amino-5-nitrobenzophenone	[M+Na]+	adduct linked to 303_[M+H]+	1	TRUE	null	648.292	C30H47N3O9S				2		FALSE	null	null	60.2	null	null	null	null	11.37	PosIDA-2	243.07285:1926 244.0762:334 245.07956:112	43.05756:12 57.0672:12 92.78423:5 103.71405:5 105.06663:6 113.09304:5 119.08508:6 133.0979:5 135.04645:6 141.0753:5 143.08621:12 149.88861:5 170.0546:5 173.08914:6 179.17863:5 186.07097:5 189.97644:5 207.02972:6 210.03091:12 213.1581:5 226.04762:6 243.0746:30	21199	20312	18472
334	8.58	514.8	243.086	w/o MS2:3,5-Dimethoxy-4-hydroxycinnamic acid	[M+H]+	adduct linked to 384_[M+Na]+	1	TRUE	null	113.999	C4H3FN2O2				3		FALSE	null	null	99.9	null	null	null	null	59.38	PosIDA-1	243.08597:5916 244.08932:1496 245.09268:388	45.03238:4 58.06737:12 62.05658:4 67.05737:3 77.03961:8 81.0629:4 81.07047:16 84.07779:12 90.0317:8 91.05251:28 102.0909:64 103.05386:58 112.11237:8 116.0516:49 117.05537:8 118.06348:64 123.11746:20 128.05034:12 130.06406:88 140.02788:8 143.05769:8 145.07588:167 153.04181:12 157.06682:41 170.07106:192 172.08691:594 173.11496:8 179.10542:4 182.07358:12 196.16104:4 197.4595:8 198.06496:702 199.0925…	42387	39596	37453
335	4.227	253.62	243.097	Thymidine	[M+H]+	adduct linked to 385_[M+Na]+	1	TRUE	null	567.297	C34H38N4O4				2	2	FALSE	null	null	92.6	null	86.8	86.9	100	96.33	PosIDA-3	243.09705:13929 244.1004:3756 245.10376:803	41.03896:191 43.05576:359 45.03337:529 53.03798:166 54.03327:81 56.05056:105 57.0323:73 69.0332:598 71.05067:184 73.01808:12 73.02887:521 81.03266:383 82.03047:156 84.04314:427 99.04352:1150 105.08395:10 109.03932:876 110.02267:1990 117.05394:1021 126.65459:12 127.04946:17266	88138	85878	80787
336	8.193	491.58	243.182	Unknown	[M+H]+	similar chromatogram in higher mz_489; similar chromatogram in higher mz_859	1	TRUE	null	null	null	null	null	null	4		FALSE	null	null	null	null	null	null	null	158.19	PosIDA-1	243.1819:24982 244.18525:1673 245.18861:374	41.03891:86 42.03308:113 43.05387:89 44.04966:424 45.03332:133 45.05214:5 53.03792:12 55.01799:10 55.05441:38 56.04736:7 57.06931:105 58.06522:147 60.04594:28 62.06099:400 63.06038:5 65.03674:7 67.05391:80 68.04745:5 69.0646:7 70.06347:5 72.04464:14 73.03239:7 77.03713:12 79.05402:90 80.82568:7 81.0692:665 82.07232:42 84.08035:531 85.06565:53 85.08505:22 85.37247:5 91.04983:7 91.05384:10 93.06269…	222863	211768	200428
337	9.117	547.02	243.182	Unknown	[M+H]+	similar chromatogram in higher mz_861; similar chromatogram in higher mz_346; similar chromatogram in higher mz_850; similar chromatogram in higher mz_573	1	TRUE	null	null	null	null	null	null	4		FALSE	null	null	null	null	null	null	null	22.9	PosIDA-3	243.18205:3862 244.1854:403 245.18876:324	41.03801:37 43.01799:51 44.04966:42 55.0544:12 57.06613:18 57.06931:144 58.06415:12 59.04712:12 64.55583:12 67.0562:24 72.04343:12 78.55729:18 81.06792:53 84.08162:61 85.06305:88 86.06969:12 91.05784:6 92.5493:18 95.09071:12 98.05775:12 99.0448:68 102.08661:18 102.08803:52 112.09896:12 114.56675:71 115.06714:24 123.07696:6 123.11897:65 126.05386:55 143.09286:145 144.05907:18 145.05049:91 165.1040…	29774	32720	33861
338	8.671	520.26	243.182	Unknown	[M+H]+		1	TRUE	null	null	null	null	null	null	4		FALSE	null	null	null	null	null	null	null	137.7	PosIDA-2	243.18199:20938 244.18534:2069 245.1887:290	41.03889:139 43.05385:60 44.04964:302 55.01797:24 57.07034:357 58.06519:116 62.05654:12 62.06096:283 67.05618:126 72.0446:36 79.05399:24 81.07042:552 84.07902:395 85.06689:257 95.08794:60 99.04337:222 101.02524:48 102.09083:2110 103.09365:98 123.10804:12 123.11893:556 124.12151:48 128.10103:12 128.11057:150 145.05214:558 146.05374:48 159.11383:10 162.07634:94 164.60886:36 184.16852:36 193.14977:3…	168984	167138	177058
339	1.558	93.48	244.092	Cytidine	[M+H]+	adduct linked to 388_[M+Na]+; found in higher mz's MsMs_865	1	TRUE	null	337.237	C20H34O5				2	2	FALSE	null	null	92.1	null	85.3	87	100	32.5	PosIDA-1	244.09216:8542 245.09551:1553 246.09887:274	42.03573:10 57.03425:36 67.03542:12 69.04466:36 71.01029:24 83.08913:10 85.02929:24 91.05234:10 94.04185:88 95.02493:545 105.07073:10 112.0498:5884 119.03282:36 131.03:12 136.06012:24 139.51697:10 173.05928:24 184.0313:10 227.08362:48 244.10942:80	63737	58088	60304
340	7.043	422.58	244.189	Unknown	[M+H]+		1	TRUE	null	null	null	null	null	null	4		FALSE	null	null	null	null	null	null	null	7.59	PosIDA-1	244.18898:1219 245.19233:689 246.19569:125	81.07162:10 87.04289:24 105.07222:10 144.09596:24 163.07219:10 227.07317:10 244.19279:60	8307	7511	7232
341	12.316	738.96	244.226	w/o MS2:2,4,7,9-Tetramethyl-5-decyne-4,7-diol	[M+H]+		1	TRUE	null	182.081	C9H11NO3				3		FALSE	null	null	99.4	null	null	null	null	22.58	PosIDA-1	244.226:2096 245.22935:593 246.23271:188	44.0496:60 57.07029:36 62.06091:92 71.08597:12 85.36716:10 98.02153:10 111.07815:10 140.07246:12 144.49687:10 188.07507:10 209.15959:10	13176	12505	12370
342	4.388	263.28	244.344	Unknown	[M+H]+		1	FALSE	null	null	null	null	null	null	4		FALSE	null	null	null	null	null	null	null	503.01	PosIDA-1	244.34422:1943 245.34757:20 246.35093:209		15285	13593	14602
343	1.812	108.72	245.075	Uridine	[M+H]+	adduct linked to 389_[M+Na]+	1	TRUE	null	339.253	C20H36O5				2	2	FALSE	null	null	93.1	null	87.6	89.3	100	27.43	PosIDA-2	245.07529:4797 246.07864:964 247.082:172	43.01801:269 45.0324:81 55.01386:36 55.01906:360 57.03226:320 59.04715:24 61.02798:48 69.02967:12 69.03433:149 70.0283:724 71.01282:104 73.02763:169 85.02948:197 95.02377:137 96.00784:1175 97.02736:161 112.69225:64 113.03492:11946 115.03864:167 133.04132:12 133.04779:117	31415	33419	32195
344	4.388	263.28	245.094	Biotin	[M+H]+	adduct linked to 390_[M+Na]+; found in higher mz's MsMs_936; found in higher mz's MsMs_869; found in higher mz's MsMs_457; found in higher mz's MsMs_450	1	TRUE	null	316.121	C17H18ClN3O				2	2	FALSE	null	null	97.1	null	94.3	96.2	100	2868.08	PosIDA-1	245.09447:484045 246.09782:91881 247.10118:43754	41.03883:319 42.03391:208 43.01698:60 44.05144:132 44.98148:126 46.99561:155 53.03986:60 54.03311:167 55.01685:48 55.05326:1309 56.04935:351 57.07026:48 58.99852:419 59.04916:60 61.01249:271 61.04097:729 65.03661:60 67.04344:59 67.05493:1506 68.04731:155 69.04698:97 69.07146:234 70.02812:84 70.99492:48 71.05164:241 73.00948:127 74.00622:474 76.02119:978 77.03822:325 79.05387:1907 80.0495:202 81.0…	3798969	3721085	3853688
345	4.795	287.7	245.095	w/o MS2:Biotin	[M+H]+		1	FALSE	null	138.066	C6H7N3O				3		FALSE	null	null	99.8	null	null	null	null	52.3	PosIDA-2	245.09471:10026 246.09806:1655 247.10142:740		94315	97865	109281
346	9.125	547.5	245.126	Unknown	[M+H]+	found in higher mz's MsMs_573	1	TRUE	null	null	null	null	null	null	4		FALSE	null	null	null	null	null	null	null	14.13	PosIDA-2	245.12605:2587 246.1294:742 247.13276:247	69.06821:10 97.07582:12 116.06233:12 117.06161:24 128.95506:12 142.06163:12 142.06497:96 143.07132:170 147.11691:10 153.01773:12 154.07253:36 161.08199:12 170.05849:24 186.04636:12 186.09036:193 203.10999:12 203.12398:24	16960	18625	18436
347	10.161	609.66	245.128	Unknown	[M+H]+	found in higher mz's MsMs_564	1	TRUE	null	null	null	null	null	null	4		FALSE	null	null	null	null	null	null	null	8.86	PosIDA-1	245.12715:1438 246.1305:387 247.13386:213	45.04636:4 83.08775:4 85.02789:3 91.0509:8 95.04532:3 97.10164:8 101.02218:3 115.05028:4 121.09019:4 126.96522:3 131.07158:3 139.91132:3 142.06601:12 143.07236:71 152.0627:4 153.00143:12 154.0614:16 156.0784:12 167.02464:3 170.06322:8 182.9483:4 183.01469:12 186.09526:104 189.07426:8 197.03151:4 203.11906:8 215.08844:4 227.04109:4 229.0954:4 245.10049:8 245.13342:12	12224	12662	12804
348	10.659	639.54	246.242	Unknown	[M+H]+		1	TRUE	null	null	null	null	null	null	4		FALSE	null	null	null	null	null	null	null	32.04	PosIDA-1	246.24419:2183 247.24754:572 248.2509:84	41.03886:10 43.01702:5 43.05474:12 44.04869:7 55.0533:10 57.06924:17 59.04706:5 62.06092:2 69.04471:2 70.06222:7 72.08146:5 81.07037:5 83.04956:5 85.02805:5 88.07564:46 98.09794:7 101.05479:5 102.09077:7 106.08812:16 109.09915:7 111.04124:12 124.08395:5 129.05348:7 143.02565:2 148.12521:5 153.1006:5 184.0143:5 217.09467:2 228.23485:19 245.48311:5 246.24394:257	24723	23462	24256
349	7.68	460.8	247.106	w/o MS2:5-Ethyl-5-p-tolylbarbituric acid	[M+H]+		1	TRUE	null	702.442	C36H60O12	Triterpene saponins	RCCBGOMNZWYBTJ-UHFFFAOYNA-N	CC(CC(O)C(O)C(C)(C)O)C1CCC2(C)C3CCC4C5(CC35CCC12C)C(O)CC(O)C4(C)C(=O)OC1OC(CO)C(O)C(O)C1O	3		FALSE	null	null	98.2	null	null	null	null	7.91	PosIDA-3	247.10577:1243 248.10912:437 249.11248:142	43.01344:6 71.04712:5 91.05124:6 99.93594:5 105.03507:6 105.05951:6 115.04921:6 117.05849:12 119.08669:6 121.10145:12 123.11443:6 138.93651:5 145.05064:12 145.103:6 147.05388:12 152.91875:6 158.05972:6 160.07957:12 164.98172:5 182.95276:5 188.07547:24 219.11642:5 229.15355:6 247.14967:18	7433	8399	9166
350	12.846	770.76	247.227	Unknown	[M+H]+		1	TRUE	null	null	null	null	null	null	4		FALSE	null	null	null	null	null	null	null	16.66	PosIDA-2	247.22673:1861 248.23008:426 249.23344:706	43.05387:12 45.03614:70 57.06507:12 57.07143:36 67.05736:10 85.10058:24 89.0603:36 105.06661:12 121.09981:10 143.08116:12 159.1033:12 164.46144:10 191.08559:10 216.35994:12 219.13702:24 219.60229:24 220.83221:24 223.31282:12 229.20859:12	21169	25994	23822
351	8.28	496.8	248.114	w/o MS2:N-.alpha.-(tert-Butoxycarbonyl)-L-Glutamic acid	[M+H]+		0.333	FALSE	null	155.049	C11H8O2				3		FALSE	null	null	99	null	null	null	null	19.33	PosIDA-2	248.11435:1168 249.1177:1049 250.12106:122		8896	9550	8159
352	7.488	449.28	248.222	Unknown	[M+H]+		1	TRUE	null	null	null	null	null	null	4		FALSE	null	null	null	null	null	null	null	30.98	PosIDA-1	248.22197:1538 249.22532:469 250.22868:152	41.03799:10 43.01981:4 44.05151:8 46.06302:5 57.0714:58 59.0471:4 69.06573:2 69.06923:15 70.06461:31 83.08285:4 84.96088:2 88.07439:72 106.0853:288 107.08574:4 111.07825:2 118.93508:2 121.05346:2 139.11327:2 141.06689:2 169.99965:2 185.08891:2 190.08459:5 231.1105:2 248.07401:4 248.22423:26	10230	10286	12179
353	1.019	61.14	249.096	w/o MS2:L-Carnosine	[M+Na]+	adduct linked to 314_[M+H]+	1	TRUE	null	120.044	C7H7NO2				3		FALSE	null	null	100	null	null	null	null	12.65	PosIDA-1	249.09573:1685 250.09908:425 251.10244:69	41.04077:10 56.96774:10 79.05415:12 90.04646:10 93.06283:12 101.05646:10 112.03086:12 115.05831:12 118.08192:24 124.95747:12 135.08574:12 148.01468:10 217.15515:10 232.06703:12 234.37572:10 249.09821:36	12264	11952	11743
354	7.096	425.76	249.122	Unknown	[M+H]+		1	TRUE	null	null	null	null	null	null	4		FALSE	null	null	null	null	null	null	null	20.72	PosIDA-1	249.12196:2244 250.12531:405 251.12867:153	116.04388:12 118.05873:24 119.0742:24 129.05823:12 130.06386:24 137.67621:10 146.08244:24 147.03487:36 154.8564:10 160.0757:36 162.05122:60 162.08871:48 172.06642:12 172.0701:24 175.05939:36 178.06319:10 189.10156:193 190.08636:237 196.01347:10 207.11217:36 231.10391:12 231.11031:36 249.12407:36	25214	23527	24696
355	7.392	443.52	249.122	Unknown	[M+H]+		1	TRUE	null	null	null	null	null	null	4		FALSE	null	null	null	null	null	null	null	44.54	PosIDA-3	249.12184:4543 250.12519:1152 251.12855:146	43.01613:4 57.06928:2 59.04817:4 79.05398:2 89.03773:2 91.04977:5 103.05235:5 104.04699:5 106.06072:4 109.0992:2 115.05505:12 116.0515:28 117.06286:5 117.06893:6 118.06033:4 119.03448:11 119.07426:4 121.09972:4 127.05242:4 128.95477:4 129.05672:4 130.06874:15 131.07507:12 132.04501:12 133.06381:5 137.05992:2 140.05099:4 142.06464:6 144.04385:6 145.06224:7 146.04523:4 146.08421:4 147.03325:15 147.…	28606	32463	27591
356	3.98	238.8	250.072	w/o MS2:N-(1,1-Dimethyl-2-hydroxyethyl)-3-amino-2-hydroxypropanesulfonic acid	[M+H]+		1	TRUE	null	347.222	C21H30O4				3		FALSE	null	null	100	null	null	null	null	22.86	PosIDA-2	250.07225:3300 251.0756:762 252.07896:321	43.0216:10 69.07031:12 94.05001:10 101.05895:24 133.07338:10 143.99155:10 156.0891:10 173.12202:12	20891	21761	20103
357	8.261	495.66	250.155	w/o MS2:Aminoglutethimide	[M+H]+		1	TRUE	null	189.017	C8H5F3O2				3		FALSE	null	null	99.9	null	null	null	null	53.43	PosIDA-1	250.15456:2032 251.15791:756 252.16127:339	86.05419:24 90.04243:24 94.06933:24 103.05254:36 104.05005:36 105.05524:24 115.04774:24 115.05376:332 117.05853:60 118.06512:60 127.05109:24 130.06578:612 131.04803:24 131.07211:1239 132.05333:48 133.05435:24 142.05991:60 142.06325:99 143.07294:825 144.0778:186 146.09467:36 147.08115:81 148.07777:36 153.06972:12 155.94066:10 158.06508:126 159.06635:2601 159.7374:24 173.08009:36 173.55272:36 174.0…	13942	12347	12013
358	10.342	620.52	250.19	Unknown	[M+H]+	similar chromatogram in higher mz_884	1	TRUE	null	null	null	null	null	null	4		FALSE	null	null	null	null	null	null	null	49.96	PosIDA-1	250.19014:1808 251.19349:1224 252.19685:368	42.03488:8 43.05385:8 44.04872:30 45.03518:12 52.09335:3 59.0471:16 62.05655:4 64.97678:3 67.05389:16 77.03587:12 79.05275:8 81.06917:31 84.07645:8 84.08031:49 85.08372:16 93.06942:8 95.08385:12 96.08197:8 98.10079:8 100.10832:4 101.06332:12 102.09226:133 103.08939:8 109.09484:8 112.10934:12 114.12286:4 116.11046:84 122.0941:12 123.11584:53 124.1106:27 126.12943:8 138.12921:12 142.12154:4 149.056…	14614	14380	16030
359	11.003	660.18	250.191	Unknown	[M+H]+		1	TRUE	null	null	null	null	null	null	4		FALSE	null	null	null	null	null	null	null	15.99	PosIDA-1	250.18988:1190 251.19323:1301 252.19659:407	41.03976:10 43.01702:5 44.04962:49 46.0668:10 51.02193:2 57.03323:5 57.06819:24 59.04921:7 66.04482:2 70.06692:7 76.07507:7 81.06911:25 84.08154:36 85.06297:13 93.0707:14 94.06639:12 95.07558:10 95.08652:12 98.98331:21 100.11246:10 101.05619:7 107.08857:10 110.09601:34 111.10331:2 116.0998:5 116.10735:148 117.10986:10 121.03024:5 122.09711:10 123.11887:34 124.1105:83 126.12776:10 136.11092:10 138…	12674	11912	14103
360	11.248	674.88	251	w/o MS2:Leukotriene F4	[M+H]+		1	TRUE	2.39	326.126	C12H23NO7S	NA			3		FALSE	null	null	100	null	null	null	null	129.51	PosIDA-1	251.00006:14338 252.00341:1732 253.00677:16006	42.03483:10 59.0481:36 77.03824:36 84.07892:36 98.98744:460 110.10036:12 117.06578:12 135.11792:10 140.13718:12 147.00931:12 149.01912:24 152.0629:48 154.15561:24 175.01109:24 195.10345:12 219.1595:12 223.97726:36 235.13992:12 251.04674:48	134682	121186	146003
361	8.534	512.04	251.045	Unknown	[M+H]+		1	TRUE	null	null	null	null	null	null	4		FALSE	null	null	null	null	null	null	null	16.55	PosIDA-1	251.04506:2664 252.04841:461 253.05177:42	51.02201:6 51.02502:12 57.06828:12 59.04931:105 77.03349:12 77.03841:52 93.0668:5 95.04702:18 98.09671:18 98.98487:30 117.09335:18 121.02889:12 124.11227:12 149.02116:30 152.05977:24 153.07657:35 157.00888:12 168.05443:12 175.02075:18 195.17441:5 196.96133:57 205.00287:12 210.36037:5 215.0275:30 223.97356:56 233.03773:18 251.0473:154 251.17397:12	47553	47831	50749
362	11.407	684.42	251.047	w/o MS2:PTH-aspartic acid	[M+H]+	found in higher mz's MsMs_412; found in higher mz's MsMs_541	1	TRUE	null	253.159	C18H22O2				3		FALSE	null	null	99.4	null	null	null	null	285.28	PosIDA-2	251.04738:48922 252.05073:10115 253.05409:1308	51.02104:12 59.04503:12 59.05149:48 72.04471:12 77.03722:386 95.04433:48 98.98492:36 124.11233:24 146.09633:10 149.02122:48 151.05505:60 152.05984:154 153.07143:169 157.0072:36 168.0545:24 175.00784:12 175.01526:60 195.1118:24 215.0132:12 215.02348:68 222.19536:36 233.04211:48 251.02963:36 251.04518:406 251.21185:24	499590	487627	433589
[truncated: 740 more rows]

## Sheet: XCMS_METLIN-positive
featureidx	MSMS	mzmed	mzmin	mzmax	rtmed	rtmin	rtmax	maxint	isotopes	adducts	peakgroup	METLIN	name	METLIN_MSMS	in the mixture	ISF
[truncated: 4,853 more rows]
