# Supplementary material for: MetaboKit: a comprehensive data extraction tool for untargeted metabolomics
Source: Royal Society of Chemistry journal article supplement (doi:10.1039/d0mo00030b), 2020-06-10
Supplement: d0mo00030b4.xlsx [file d0mo00030b4.xlsx]

## Sheet: Legend
Supplementary Table 3
DDA analysis of mouse liver samples by MetaboKit and MS-DIAL
MetaboKit-Neg-Aqu	Aqueous fraction in negative ionization mode scans analyzed by MetaboKit
MetaboKit-Neg-Org	Organic fraction in negative ionization mode scans analyzed by MetaboKit
MetaboKit-Pos-Aqu	Aqueous fraction in positive ionization mode scans analyzed by MetaboKit
MetaboKit-Pos-Org	Organic fraction in positive ionization mode scans analyzed by MetaboKit
MSDIAL-Neg-Aqu	Aqueous fraction in negative ionization mode scans analyzed by MSDIAL
MSDIAL-Neg-Org	Organic fraction in negative ionization mode scans analyzed by MSDIAL
MSDIAL-Pos-Aqu	Aqueous fraction in positive ionization mode scans analyzed by MSDIAL
MSDIAL-Pos-Org	Organic fraction in positive ionization mode scans analyzed by MSDIAL
group	Parent ion and ISF group
ISF	Indicating whether a peak is an ISF
name	Compound name
adduct	adduct associated with the precursor peak
feature_m/z	mass-to-charge ratio
KOx	CDK1 knockout mouse x
WTx	Wild type mouse x
RT_x	Retention time of compound identification in sample x
score_x	Spectral library matching score in sample x

## Sheet: MetaboKit-Neg-Aqu
group	ISF	name	adduct	feature_m/z	KO1	KO2	KO3	KO4	KO5	WT1	WT2	WT3	WT4	WT5	RT_KO1	RT_KO2	RT_KO3	RT_KO4	RT_KO5	RT_WT1	RT_WT2	RT_WT3	RT_WT4	RT_WT5	score_KO1	score_KO2	score_KO3	score_KO4	score_KO5	score_WT1	score_WT2	score_WT3	score_WT4	score_WT5
1		(R)-3-Hydroxybutyric acid C4H8O3 MoNA 440114---2-Hydroxyisobutyric acid C4H8O3	M-H 1-	103.04	26.4	35.5	35.4	26.8	465.4	29.9	32		30.1		2.67	2.78	2.77	2.68	0.99	2.68	2.69		2.72		0.75	0.73	0.72	0.69	0.73	0.72	0.7		0.75
2		Fumaric acid C4H4O4	M-H 1-	115.004								116.1										0.94										0.99
3		Erythronolactone C4H6O4---Succinic acid; LC-ESI-QTOF; MS2; CE C4H6O4	M-H 1-	117.019	84.9	85.7									0.93	0.93									0.94	0.95
4		Taurine [2M-H]- C2H7NO3S NIST 1173837---Taurine [2M-H]- C2H7NO3S NIST 1173838---Taurine [M-H]- C2H7NO3S NIST 1173845	M-H 1-	124.008	2690.9	2552.4	3229.2	3472.3	4154.5	1596.1	1696.1	5464.8	3403	1527.5	0.98	0.97	0.99	0.99	0.97	0.99	0.99	0.99	0.97	0.97	1	1	0.99	1	0.99	0.99	0.99	0.99	1	0.99
5		DL-Malic acid [2M-H]- C4H6O5 NIST 1061976---Malic acid C4H6O5	M-H 1-	133.014	242.8	163.4	169.9	259.8	193.1	235	176.8	343.6	402.3	247.9	0.93	0.93	0.94	0.94	0.93	0.95	0.94	0.94	0.93	0.93	0.78	0.78	0.69	0.74	0.7	0.93	0.87	0.82	0.91	0.9
6		Adenine C5H5N5 MoNA 440100---Adenine; LC-ESI-QTOF; MS2; CE C5H5N5	M-H 1-	134.047	84.3	210.4	21.9	21.2	28.6	58.1	53.2	19.4	35	22.5	2.6	2.6	2.61	2.57	2.58	2.59	2.6	2.61	2.58	2.59	0.94	0.96	0.95	0.94	0.95	0.94	0.94	0.94	0.94	0.93
7		Hypoxanthine C5H4N4O	M-H 1-	135.03	80.9	47.2		51.8	50.4	20.7			62.4	55.2	1.6	1.59		1.6	1.6	3.04			1.6	1.6	0.94	0.97		0.96	0.89	0.82			0.91	0.91
8		Glutamine C5H10N2O3---Glutamine; LC-ESI-ITFT; MS2; CE 75.0 eV; [M-H]- C5H10N2O3---Glutamine; LC-ESI-ITFT; MS2; CE 80.0 eV; [M-H]- C5H10N2O3---L-Glutamine [M-H]- C5H10N2O3 NIST 1187710---L-Glutamine [M-H]- C5H10N2O3 NIST 1187711	M-H 1-	145.062	388.3	358.5	385.4	529.7	446.8	259.9	221.3	398.4	651.4	419	1	1	0.99	0.99	0.99	0.99	0.99	0.99	1	0.99	0.83	0.86	0.84	0.97	0.9	0.95	0.83	0.95	0.9	0.96
9		Unknown (carbon number 5); PlaSMA ID-102 C5H4N4O2---XANTHINE C5H4N4O2---Xanthine C5H4N4O2 MoNA 440035	M-H 1-	151.026	35.1	140.1	44.7	24.8	94.5	41.2	31.8	19.5	99.9	75	1.6	1.62	1.6	1.61	1.6	1.61	1.6	1.6	1.6	1.6	0.73	0.89	0.86	0.8	0.92	0.94	0.81	0.8	0.89	0.85
10		P-Anisic acid C8H8O3	M-H 1-	151.04	18.4	15.3	14.8	15.1	14.8	14.6	17.8	16.9	15.2	11.1	8.72	8.73	8.75	8.73	8.74	8.73	8.73	8.73	8.73	8.72	0.91	0.84	0.9	0.91	0.9	0.81	0.85	0.89	0.89	0.81
11		D-Fructose [M-H]- C6H12O6 NIST 1076648---Psicose C6H12O6---Tagatose C6H12O6	M-H2O-H 1-	161.045	207.1		277.3	192.4	265						1.05		1.04	1.04	1.04						0.95		0.71	0.71	0.7
12		DL-Phenylalanine [M-H-NH3]- C9H11NO2 NIST 1189950---DL-Phenylalanine [M-H-NH3]- C9H11NO2 NIST 1189951---L-(-)-Phenylalanine C9H11NO2---L-(-)-Phenylalanine; LC-ESI-QTOF; MS2; CE C9H11NO2---L-Phenylalanine C9H11NO2 MassBank 3219---L-Phenylalanine C9H11NO2 MoNA 439021---Phenylalanine C9H11NO2	M-H 1-	164.071	56.5	27.6	75.6	50	78.2	23.4	23.9	33.6	73.4	32.7	3.22	3.22	3.22	3.21	3.21	3.19	3.19	3.23	3.21	3.21	0.92	0.97	0.91	0.94	0.91	0.99	0.94	0.93	0.92	0.97
13		URATE C5H4N4O3	M-H 1-	167.021	400	282.3		352.1	410.4						1.07	1.09		1.08	1.09						0.54	0.57		0.59	0.52
14		Glycerol-2-phosphate; LC-ESI-QTOF; MS2; CE C3H9O6P	M-H 1-	171.006							387.6	350.7		896.6							0.94	0.94		0.95							0.99	0.99		0.99
15		Ascorbic acid C6H8O6	M-H 1-	175.024									371.1	139									0.95	0.95									0.9	0.81
16	*	.beta.-D-Allose [2M-H]- C6H12O6 NIST 1076740---D-Fructose [M-H]- C6H12O6 NIST 1076647---D-Fructose [M-H]- C6H12O6 NIST 1076648---Mannose C6H12O6	M-H 1-	179.056	848.2	898.1	984.3	802.7	1120.2	239.4		212.4	499.2	406.3	1.03	1.02	1.01	1.01	1.02	1.01		1.01	1.02	1.02	0.93	0.92	0.93	0.93	0.93	0.87		0.9	0.91	0.93
16	*	Glyceraldehyde C3H6O3	2M-H 1-	179.056							378.9										1.01										0.93
16	*	ISF of Glyceraldehyde C3H6O3	-	89.0244							179.8										0.99										0.65
17		3-Hydroxyphenylalanine C9H11NO3---L-Tyrosine C9H11NO3 MassBank 3190---L-Tyrosine C9H11NO3 MoNA 439023---L-Tyrosine [M-H-NH3]- C9H11NO3 NIST 1187834---L-Tyrosine [M-H-NH3]- C9H11NO3 NIST 1187835---M-Tyrosine C9H11NO3---Tyr C9H11NO3	M-H 1-	180.066	44.7	27.2	53.4	40.4	64.7	25.7	27.9	60.8	76	39.5	1.52	1.51	1.53	1.51	1.51	1.52	1.52	1.51	1.51	1.51	0.97	0.87	0.97	0.93	0.91	0.99	0.93	0.95	0.87	0.95
18	*	ISF of N-Acetyl-L-glutamic acid [M-H]- C7H11NO5 NIST 1180261---N-Acetyl-L-glutamic acid [M-H]- C7H11NO5 NIST 1180270---N-ACETYL-DL-GLUTAMIC ACID C7H11NO5---N-Acetyl-L-glutamic acid [M-H]- C7H11NO5 NIST 1180268---N-Acetyl-L-glutamic acid [M-H]- C7H11NO5 NIST 1180269	-	146.046										155.6										0.95										0.98
18	*	N-ACETYL-DL-GLUTAMIC ACID C7H11NO5---N-Acetyl-L-glutamic acid [M-H]- C7H11NO5 NIST 1180261---N-Acetyl-L-glutamic acid [M-H]- C7H11NO5 NIST 1180268---N-Acetyl-L-glutamic acid [M-H]- C7H11NO5 NIST 1180269---N-Acetyl-L-glutamic acid [M-H]- C7H11NO5 NIST 1180270	M-H 1-	188.056	82.9	125.1	147	156.9		100.4	120.1		174.1	114.1	0.93	0.95	0.94	0.94		0.95	0.94		0.95	0.95	0.9	0.97	0.91	0.94		0.93	0.94		0.96	0.94
19		CITRATE C6H8O7---Citric acid (Not validated, isomer of 228); PlaSMA ID-227 C6H8O7	M-H 1-	191.02	1057.7	990.2	932	961.2	585.2,916.7	983.6	994.9	1103.2	904.2	951.4	0.93	0.95	0.94	0.94	2.22,0.95	0.95	0.94	0.94	0.93	0.95	0.96	0.94	0.92	0.93	0.96,0.96	0.94	0.93	0.95	0.93	0.91
20		D-GLUCURONIC ACID C6H10O7	M-H 1-	193.035	119.2										0.96										0.83
21		Galactonic acid [M-H]- C6H12O7 NIST 1113917---Galactonic acid [M-H]- C6H12O7 NIST 1113920---Gluconate C6H12O7---Gluconic acid C6H12O7	M-H 1-	195.051	439.9	219.1	440.3	597.3	669.3	145.9	153.2		380.8	239.5	0.96	0.95	0.94	0.94	0.95	0.95	0.94		0.95	0.95	0.85	0.84	0.77	0.8	0.77	0.87	0.93		0.81	0.83
22		D-Erythrose-4-phosphate; LC-ESI-QTOF; MS2; CE C4H9O7P	M-H 1-	199.001								72.2		83.3								0.94		0.93								0.83		0.9
23		O,O-Diethyl phosphate [M-H]- C4H11O4P NIST 1192363	M+HCOO 1-	199.036		66.1										1.15										0.89
24		L-Tryptophan C11H12N2O2 MoNA 437028---L-Tryptophan C11H12N2O2 MoNA 437029---L-Tryptophan [2M-H]- C11H12N2O2 NIST 1188388---L-Tryptophan [M-H]- C11H12N2O2 NIST 1188418---L-Tryptophan [M-H]- C11H12N2O2 NIST 1188419---Tryptophan; LC-ESI-ITFT; MS2; HCD; CE 90.0 eV; [M-H]- C11H12N2O2---Tryptophan; LC-ESI-ITFT; MS2; HCD; CE 95.0 eV; [M-H]- C11H12N2O2	M-H 1-	203.082	30.8	10	41.9	32.4	56.1	13	16.4	23.8	52.3	23	4.71	4.7	4.71	4.71	4.72	4.69	4.72	4.71	4.71	4.71	0.92	0.94	0.98	0.96	0.98	0.94	0.97	0.94	0.97	0.97
25		2-Naphthalenesulfonic acid; LC-ESI-ITFT; MS2; CE C10H8O3S	M-H 1-	207.012	152.5	171.9	122.1	323.7,29.5	107.1	161.9	137.6	145.3	144.1	163.5	7.46	7.45	7.46	7.46,7.12	7.45	7.46	7.45	7.46	7.46	7.45	0.99	0.98	0.98	0.98,1.00	0.99	0.98	0.97	0.99	0.98	0.99
26		trans-4,5-Epoxy-2(E)-decenal [M+H]+ C10H16O2 NIST 1205103	M+HCOO 1-	213.113			60.7		69				54.5				7.67		7.67				7.66				0.52		0.61				0.56
27		2-Benzothiazolesulfonic acid C7H5NO3S2	M-H 1-	213.963	10.4	55	41.8	22.1	28.5						6.47	6.45	6.45	6.46	6.45						0.96	0.95	0.95	0.96	0.97
28	*	5-Methoxypsoralen C12H8O4	M-H 1-	215.032	371.3			289.3	318						0.98			0.97	0.97						0.55			0.75	0.61
28	*	ISF of 5-Methoxypsoralen C12H8O4	-	119.035										217.1										0.99										0.96
28	*	ISF of 5-Methoxypsoralen C12H8O4	-	89.0245				396.3	473.7									0.99	0.99									0.96	0.95
29		D-(+)-Pantothenic acid; LC-ESI-QTOF; MS2; CE C9H17NO5---D-PANTOTHENIC ACID C9H17NO5---Pantothenate C9H17NO5---Pantothenic acid C9H17NO5	M-H 1-	218.103	22.8	20	29.4	30.2	39.8	6.9	10.8	37.7	30		1.88	1.92	1.92	1.91	1.91	1.91	1.91	1.91	1.92		0.97	0.97	0.92	0.94	0.95	0.71	0.96	0.96	0.97
30		Glucose C6H12O6---Mannose C6H12O6	M+HCOO 1-	225.061	154.1	139.7	176.9	156	233.7	37.6			142.9	74.5	1	1.02	1.01	1.01	1.02	1.01			1	1.02	0.97	0.97	0.97	0.96	0.98	0.92			0.98	0.97
31	*	ISF of L-Carnosine; LC-ESI-QTOF; MS2; CE C9H14N4O3	-	154.062								81.6										1.08										0.8
31	*	L-Carnosine; LC-ESI-QTOF; MS2; CE C9H14N4O3	M-H 1-	225.099								70.4										1.08										0.84
32		Acamprosate; LC-ESI-ITFT; MS2; CE C5H11NO4S	M+HCOO 1-	226.038			15.4		22.6			38.7	71.3	27			3.3		3.35			3.33	3.33	3.33			0.81		0.82			0.76	0.79	0.81
33		D-Ribose 5-phosphate [2M-H]- C5H11O8P NIST 1159911---D-Ribose 5-phosphate [M-H]- C5H11O8P NIST 1068441---D-Ribose 5-phosphate [M-H]- C5H11O8P NIST 1068442	M-H 1-	229.014				105.6	289.2	61.8			188.9					0.93	0.95	0.99			0.95					0.9	0.92	0.98			0.92
34		Diuron; LC-ESI-ITFT; MS2; CE C9H10Cl2N2O	M-H 1-	231.009	19.2	10.6	14.8		16.8	36.3	18.7	23.7	11.6	12.3	10.7	10.74	10.72		10.72	10.71	10.7	10.7	10.72	10.71	0.91	0.72	0.84		0.79	0.95	0.84	0.74	0.78	0.71
35		L-Anserine; LC-ESI-QTOF; MS2; CE C10H16N4O3	M-H 1-	239.114								207.1										1.19										0.9
36		URIDINE C9H12N2O6---Uridine C9H12N2O6---Uridine C9H12N2O6 MassBank 3945	M-H 1-	243.062	432.3	434.5	500.5	479.7	688.3	54.4	53.7	37.3	142.3	128.2	1.99	2	1.99	2	2	2	1.98	2	2	2	0.86	0.9	0.83	0.82	0.9	0.84	0.61	0.72	0.82	0.88
37		Taurine [M-H]- C2H7NO3S NIST 1173842	2M-H 1-	249.021								73.8										0.96										0.99
38		1-Deoxy-D-xylulose 5-phosphate [M-H]- C5H11O7P NIST 1114345	M+HCOO 1-	259.022		256.9										0.93										0.98
38		.alpha.-D-Galactose 1-phosphate [2M-H]- C6H13O9P NIST 1159669---.alpha.-D-Galactose 1-phosphate [M-H]- C6H13O9P NIST 1159738---.alpha.-D-Mannose 1-phosphate [M-H]- C6H13O9P NIST 1159815---D-Glucose 6-phosphate [2M-H]- C6H13O9P NIST 1178368---D-Mannose 6-phosphate [2M-H]- C6H13O9P NIST 1159962---D-Mannose 6-phosphate [M-H]- C6H13O9P NIST 1068451---D-Mannose 6-phosphate [M-H]- C6H13O9P NIST 1068452…	M-H 1-	259.021	338.6		338.1	410.2	510.4	189.7	234.5	1259.6	422.6	308.1	0.93		0.94	0.92	0.93	0.95	0.94	0.94	0.93	0.93	0.93		0.98	1	0.98	1	0.96	0.99	1	1
39		Dodecyl sulfate; PlaSMA ID-444 C12H26O4S	M-H 1-	265.147	120.7	138.4	119.7	274.9	264.5	214.3	310.3	127.1	285.5	125.9	12.34	12.33	12.35	12.32	12.34	12.33	12.32	12.33	12.34	12.34	0.75	0.76	0.76	0.76	0.76	0.76	0.76	0.77	0.77	0.76
40	*	Adenosine C10H13N5O4---Adenosine C10H13N5O4 MassBank 2676---Adenosine C10H13N5O4 MoNA 436595---Adenosine; LC-ESI-QTOF; MS2; CE C10H13N5O4	M-H 1-	266.089	29.9	8.4	30.1	31.4	41.8	10.7	6.7	23.7	31.2	12.2	4.86	4.86	4.87	4.86	4.86	4.86	4.85	4.87	4.86	4.85	0.99	0.97	0.97	0.99	0.99	0.97	0.91	0.99	0.99	1
40	*	ISF of Adenosine C10H13N5O4---Adenosine; LC-ESI-QTOF; MS2; CE C10H13N5O4---Adenosine C10H13N5O4 MoNA 436595---Adenosine C10H13N5O4 MassBank 2676	-	134.047	38.5		40.4	43.8	58.2			35.5	43.6		4.86		4.87	4.86	4.86			4.87	4.86		0.91		0.96	0.93	0.96			0.95	0.87
41	*	ISF of Inosine C10H12N4O5 MoNA 439079---Inosine; LC-ESI-QTOF; MS2; CE C10H12N4O5	-	135.031		39										3.08										0.69
41	*	Inosine C10H12N4O5---Inosine C10H12N4O5 MoNA 439079---Inosine; LC-ESI-QTOF; MS2; CE C10H12N4O5	M-H 1-	267.073	1196.9	992.3	1369.3	1017.8	1681.5	345.1	215.7	386.8	691.2	749.3	3.08	3.08	3.06	3.07	3.08	3.05	3.08	3.08	3.08	3.06	0.97	0.97	0.97	0.98	0.97	0.98	0.98	0.98	0.97	0.98
42		C14-SAS (TENTATIVE) C14H30O3S	M-H 1-	277.184		41.5	38.3					86.9		49		12.55	12.56					12.57		12.64		0.82	0.72					0.82		0.61
43		Guanosine C10H13N5O5---Guanosine; LC-ESI-QTOF; MS2; CE C10H13N5O5	M-H 1-	282.083	53.6	33.9	67.6	51	78	12.1		4.9	44.6	24.1	3.27	3.29	3.27	3.27	3.28	3.28		3.29	3.28	3.3	0.97	0.89	0.97	0.99	0.99	0.98		1	0.96	0.99
44		Xanthosine (Not validated); PlaSMA ID-511 C10H12N4O6---Xanthosine C10H12N4O6---Xanthosine C10H12N4O6 MoNA 439175---Xanthosine; LC-ESI-QTOF; MS2; CE C10H12N4O6	M-H 1-	283.067	138.9	163.4	155.1	132.3	255		14.4		70.7	72.3	1.43	1.42	1.44	1.44	1.42		1.43		1.42	1.42	1	0.99	0.99	0.99	0.98		0.97		0.99	0.99
45		OPHTHALMIC ACID C11H19N3O6	M-H 1-	288.119	112.1	56			162.3	89.6	114.5	32.2	273.8	139.1	1.16	1.15			1.15	1.17	1.17	1.17	1.16	1.15	0.66	0.61			0.81	0.67	0.74	0.65	0.91	0.61
46		Uridine C9H12N2O6 MoNA 438629	M+HCOO 1-	289.067	21.6	21.7	26.1	24.5	37.1						2.03	2.04	1.99	2	2						0.89	0.92	0.83	0.92	0.94
47		C10-LAS (STANDARD MIX) C16H26O3S	M-H 1-	297.152	539.2	761.8	473	1018.9	786.3	884.3	991	451.4	994.1	531.7	12.45	12.44	12.45	12.44	12.45	12.45	12.44	12.46	12.44	12.44	0.76	0.74	0.78	0.76	0.75	0.76	0.76	0.76	0.77	0.7
48		D-(-)-Ribose [M-H]- C5H10O5 NIST 1076658---D-Lyxose [M-H]- C5H10O5 NIST 1076627	2M-H 1-	299.097	111.1		114.2	78.7	130.6						1.12		1.1	1.11	1.11						0.59		0.67	0.58	0.51
49		N-Acetyl-D-glucosamine 6-phosphate [2M-H]- C8H16NO9P NIST 1173395---N-Acetyl-D-glucosamine 6-phosphate [2M-H]- C8H16NO9P NIST 1173396	M-H 1-	300.047	68.4	76.5	99.3	73.8							0.93	0.95	0.94	0.94							0.97	0.99	0.97	0.99
50		Epigallocatechin C15H14O7	M-H 1-	305.068	365.6	274.3	298.3	481.8	588.5	139.6	162.9				0.96	0.97	0.96	0.97	0.97	0.97	0.97				0.87	0.78	0.84	0.87	0.89	0.67	0.77
51	*	GLUTATHIONE C10H17N3O6S---Glutathione (reduced) C10H17N3O6S---Glutathione C10H17N3O6S MassBank 2955	M-H 1-	306.076	281.4		259.9		718.9	3800.8	3784.2	1297.2	19480.4	7800.4	1		1.01		1.04	1.08	1.08	1.08	1.07	1.09	0.99		0.77		0.8	0.92	0.93	0.89	0.95	0.94
51	*	ISF of Glutathione C10H17N3O6S MassBank 2955---GLUTATHIONE C10H17N3O6S---Glutathione (reduced) C10H17N3O6S	-	272.088									1101.3	443.8									1.07	1.09									0.96	0.89
52		C12-AE1S (TENTATIVE) C14H30O5S	M-H 1-	309.173	42.4			80.5	76.7		89.8	41	81.7		12.71			12.72	12.7		12.71	12.72	12.7		0.84			0.9	0.89		0.88	0.88	0.82
53		9(S)-HpOTrE [M-H]- C18H30O4 NIST 1134338---9(S)-HpOTrE [M-H]- C18H30O4 NIST 1134340---9(S)-HpOTrE [M-H]- C18H30O4 NIST 1134346---trans-EKODE-(E)-Ib [M-H]- C18H30O4 NIST 1138690---trans-EKODE-(E)-Ib [M-H]- C18H30O4 NIST 1138691---trans-EKODE-(E)-Ib [M-H]- C18H30O4 NIST 1138693	M-H 1-	309.206	19.4	17	18	15.1	25.2	16	22.6	18.1			12.13	12.08	12.13	12.06	12.16	12.09	12.13	12.14			0.62	0.6	0.61	0.61	0.62	0.51	0.51	0.5
54		C11-LAS (STANDARD MIX) C17H28O3S	M-H 1-	311.168	1606.6	2060.2	1430.6	2066.6	1746.5	2441.9	2667.1	1408.2	2104.9	1628.9	12.8	12.79	12.79	12.8	12.8	12.79	12.79	12.81	12.78	12.8	0.75	0.75	0.76	0.74	0.73	0.75	0.75	0.75	0.75	0.76
55		Adenosine C10H13N5O4---Adenosine C10H13N5O4 MoNA 436594---Adenosine C10H13N5O4 MoNA 436595	M+HCOO 1-	312.094	54.2	16.7	51.7	53.8	73.4	21	12.2	42.7	55.7	23.6	4.86	4.86	4.87	4.86	4.86	4.87	4.86	4.87	4.86	4.86	0.99	0.99	0.99	0.99	0.99	0.99	1	0.99	0.98	1
56		URIDINE-5-MONOPHOSPHATE C9H13N2O9P---Uridine 5'-monophosphate C9H13N2O9P MassBank 3927---Uridine 5'-monophosphate [2M-H]- C9H13N2O9P NIST 1173759---Uridine 5'-monophosphate [2M-H]- C9H13N2O9P NIST 1173760---Uridine 5'-monophosphate [M-H]- C9H13N2O9P NIST 1173793	M-H 1-	323.028	578.8	585.3	726.6	796.9	1000.8	597	531.9		1427.1	922	1	1	1.01	0.99	0.99	0.99	0.99		1	0.99	0.95	0.94	0.94	0.95	0.96	0.91	0.94		0.96	0.98
57		4-Dodecylbenzenesulfonic Acid C18H30O3S MoNA 440645	M-H 1-	325.183	179.8	357.6	1693.8	256.2	203.2	2412.3	471.9	1572.2	1928.9	1781	12.84	12.88	13.1	12.87	12.85	13.1	12.88	13.1	13.09	13.11	0.93	0.88	0.88	0.95	0.92	0.92	0.95	0.93	0.9	0.89
58		Dodecylbenzenesulfonic acid C18H30O3S	M-H 1-	325.183	1747.5	2109.6		2027	1724.5		2518				13.1	13.11		13.11	13.1		13.09				0.92	0.91		0.88	0.93		0.92
59		FA 18:1+3O; PlaSMA ID-735 C18H34O5---FA 18:1+3O; PlaSMA ID-738 C18H34O5	M-H 1-	329.232		521.9	134.2		207.7							10.34	10.35		10.33							0.76	0.57		0.64
60		15-Ketoiloprost [M-H-H2O]- C22H30O4 NIST 1206812	M-H2O-H 1-	339.199	1244.7	1478.1	1213.3	1346.4	1203	1543.9	1543.2	1171.5	1251.6	1215.6	13.37	13.37	13.37	13.37	13.38	13.36	13.36	13.37	13.36	13.38	0.73	0.76	0.66	0.73	0.71	0.74	0.72	0.73	0.71	0.72
61		2,2'-Methylene-bis(6-tert-butyl-4 methylphenol) [M-H]- C23H32O2 NIST 1202717	M-H 1-	339.231	76.4	73.2	66.5	72.3	75.4	66.1	78.5	70.2	73.2	90.3	13.9	13.88	13.88	13.9	13.89	13.89	13.88	13.88	13.88	13.89	0.87	0.81	0.75	0.78	0.88	0.87	0.8	0.81	0.89	0.82
62		Beta-Glycerophosphoric acid C3H9O6P MoNA 439210	2M-H 1-	343.019									239.9	115.7									0.93	0.93									0.83	0.85
63	*	2'-DEOXYGUANOSINE 5'-MONOPHOSPHATE C10H14N5O7P---Adenosine 5'-monophosphate C10H14N5O7P---Adenosine 5'-monophosphate [M-H]- C10H14N5O7P NIST 1161751	M-H 1-	346.055	5059.3	4368	8049.9	8510.4	10792.9	4874.2	3525.9	2745.6	14593.5	7820	1.32	1.31	1.33	1.31	1.31	1.32	1.3	1.32	1.31	1.31	0.97	0.97	0.96	0.96	0.96	0.98	0.98	0.98	0.97	0.96
63	*	ISF of Adenosine 5'-monophosphate [M-H]- C10H14N5O7P NIST 1161751---Adenosine 5'-monophosphate C10H14N5O7P---2'-DEOXYGUANOSINE 5'-MONOPHOSPHATE C10H14N5O7P	-	134.047		44.8					47.6			59		1.33					1.32			1.33		0.95					0.74			0.76
64		INOSINE 5'-PHOSPHATE C10H13N4O8P---Inosine 5'-monophosphate [M-H]- C10H13N4O8P NIST 1178901---Inosine-5'-monophosphate; LC-ESI-QTOF; MS2; CE C10H13N4O8P---Inosine-5-monophosphate C10H13N4O8P---Inosinic acid C10H13N4O8P MoNA 439080	M-H 1-	347.038	570.1	435.1	448.4	481.8	1009.5	334.2	180.1	7007.1	681.4	531.9	1.1	1.09	1.1	1.11	1.09	1.1	1.1	1.1	1.09	1.09	0.94	0.96	0.96	0.93	0.96	0.96	0.95	0.96	0.97	0.95
65		Ascorbic acid C6H8O6	2M-H 1-	351.055				78.2	92.5									0.94	0.93									0.54	0.51
66		Guanosine 5'-monophosphate C10H14N5O8P---Guanosine 5'-monophosphate; LC-ESI-QTOF; MS2; CE C10H14N5O8P---Guanosine monophosphate C10H14N5O8P MassBank 5252---Guanosine monophosphate C10H14N5O8P MoNA 439075	M-H 1-	362.049	632	482.3	975.1	1032.8	1342.5	485	470.9	150.5	1799.6	869.8	1.07	1.09	1.08	1.08	1.09	1.08	1.08	1.08	1.09	1.09	0.98	0.98	0.98	0.97	0.98	0.97	0.98	0.93	0.96	0.97
67		S-(5'-ADENOSYL)-L-HOMOCYSTEINE C14H20N6O5S---S-Adenosyl-homocysteine C14H20N6O5S---S-Adenosylhomocysteine C14H20N6O5S MassBank 6264	M-H 1-	383.113	118.9	78.3	107	93.5	170.9	36.3	45.1	13.1	167.4	81.4	4.3	4.3	4.3	4.3	4.3	4.31	4.3	4.3	4.31	4.29	0.96	0.96	0.96	0.95	0.96	0.93	0.95	0.86	0.95	0.93
68		6.alpha.-Mannobiose [M-H]- C12H22O11 NIST 1068413---6.alpha.-Mannobiose [M-H]- C12H22O11 NIST 1068416---6.alpha.-Mannobiose [M-H]- C12H22O11 NIST 1068417---D-(+)-Trehalose; LC-ESI-QTOF; MS2; CE C12H22O11---Palatinose C12H22O11---Sucrose C12H22O11---Sucrose; LC-ESI-QTOF; MS2; CE C12H22O11	M+HCOO 1-	387.113	346.5	758.8	482.7	560.4	582.5	170.1	233.5	144.5			1.07	1.09	1.08	1.11	1.09	1.1	1.08	1.03			0.93	0.97	0.92	0.92	0.9	0.83	0.93	0.84
69		Adenosine 5'-diphosphate [2M-H]- C10H15N5O10P2 NIST 1161639---Adenosine 5'-diphosphate [M-H]- C10H15N5O10P2 NIST 1161684---Adenosine 5'-diphosphate [M-H]- C10H15N5O10P2 NIST 1161685	M-H 1-	426.02	34.3		127.6	216.6	359.9			196.9	1820.3		1.19		1.26	1.26	1.22			1.26	1.16		0.73		0.81	0.92	0.95			0.96	0.96
70		Riboflavin-5'-monophosphate; LC-ESI-QTOF; MS2; CE C17H21N4O9P	M-H 1-	455.094		10.1		11.4	16.9				33	12		6.58		6.59	6.56				6.58	6.57		0.59		0.56	0.62				0.65	0.6
71		D-Ribose 5-phosphate [M-H]- C5H11O8P NIST 1159949	2M-H 1-	459.028								25.1										0.92										0.66
72		lysoPE 18:2; [M-H]-; PE(18:2(2E,4E)/0:0) C23H44NO7P---lysoPE 18:2; [M-H]-; PE(18:2(6Z,9Z)/0:0) C23H44NO7P---lysoPE 18:2; [M-H]-; PE(18:2(9E,10E)/0:0) C23H44NO7P---lysoPE 18:2; [M-H]-; PE(18:2(9E,12E)/0:0) C23H44NO7P---lysoPE 18:2; [M-H]-; PE(18:2(9Z,11Z)/0:0) C23H44NO7P---lysoPE 18:2; [M-H]-; PE(18:2(9Z,12Z)/0:0) C23H44NO7P	M-H 1-	476.276		39.1			48.2							13.33			13.31							0.89			0.95
73		1-Stearoyl-2-hydroxy-sn-glycero-3-phosphoethanolamine [M-H]- C23H48NO7P NIST 1151471---1-Stearoyl-2-hydroxy-sn-glycero-3-phosphoethanolamine [M-H]- C23H48NO7P NIST 1151472---1-Stearoyl-2-hydroxy-sn-glycero-3-phosphoethanolamine [M-H]- C23H48NO7P NIST 1151481---lysoPE 18:0; [M-H]-; PE(18:0/0:0) C23H48NO7P	M-H 1-	480.307	36.6	35		31.4	36.5	36	38.3		38.1	38.2	14.22	14.23		14.22	14.23	14.24	14.22		14.22	14.23	0.98	0.96		0.97	0.98	0.97	0.98		0.99	0.98
74		lysoPE 20:4; [M-H]-; PE(20:4(5E,8E,11E,14E)/0:0) C25H44NO7P---lysoPE 20:4; [M-H]-; PE(20:4(5Z,8Z,11Z,14Z)/0:0) C25H44NO7P---lysoPE 20:4; [M-H]-; PE(20:4(7E,10E,13E,16E)/0:0) C25H44NO7P	M-H 1-	500.275		62.2	22.5		86.2							13.31	13.31		13.31							0.96	0.84		0.94
75	*	ISF of Maltotriose C18H32O16 MassBank 5167---D-(+)-Raffinose; LC-ESI-QTOF; MS2; CE C18H32O16---Maltotriose C18H32O16	-	341.108				1050.2										1.11										0.69
75	*	D-(+)-Raffinose; LC-ESI-QTOF; MS2; CE C18H32O16---Maltotriose C18H32O16---Maltotriose C18H32O16 MassBank 5167	M-H 1-	503.159	130.6	194.4	273.5	217.2	194	148.4	87.6	164.7	257	258.2	1.12	1.18	1.13	1.13	1.11	1.13	1.12	1.12	1.11	1.11	0.86	0.65	0.71	0.82	0.74	0.7	0.59	0.65	0.66	0.82
76		Adenosine 5'-triphosphate [M-H]- C10H16N5O13P3 NIST 1162433	M-H 1-	505.985									239.7										1.14										0.86
77		Taurocholic acid [M-H]- C26H45NO7S NIST 1076865	M-H 1-	514.281	1480.1										10.91										0.72
78		LPS 18:0; [M-H]- C24H48NO9P	M-H 1-	524.296	55.9	56	54.7	52.9	57.4	53.9		56.1		60.2	13.85	13.85	13.86	13.85	13.84	13.86		13.84		13.85	0.81	0.8	0.84	0.72	0.82	0.79		0.8		0.68
79		LPC 16:1; [M+FA-H]- C24H48NO7P	M+HCOO 1-	538.313	13.9	60.7	17.8		25.6						13.21	13.11	13.22		13.08						0.99	0.96	0.94		0.93
80		LPC 16:0; [M+FA-H]- C24H50NO7P	M+HCOO 1-	540.328	119.4	99.3	90.3	94.6	106.4	91.8	105.5	77	89	93.4	13.67	13.67	13.65	13.66	13.66	13.66	13.66	13.66	13.65	13.67	0.97	0.97	0.97	0.97	0.98	0.97	0.98	0.97	0.98	0.99
81		Maltotriose C18H32O16---Maltotriose; LC-ESI-QTOF; MS2; CE C18H32O16---Unknown (carbon number 25); PlaSMA ID-1397 C25H28O11	M+HCOO 1-	549.165	266.6	233.5	529.4	432.4	405	281.2	156.8	331	526	513.4	1.12	1.13	1.13	1.13	1.11	1.13	1.12	1.12	1.11	1.11	0.75	0.73	0.75	0.75	0.76	0.73	0.75	0.74	0.74	0.74
82		Adenosine 5'-diphosphoribose [M-H]- C15H23N5O14P2 NIST 1068483---Adenosine 5'-diphosphoribose [M-H]- C15H23N5O14P2 NIST 1068484	M-H 1-	558.062	65.2	143.7	212.2	209.8	773.3	116.7	97.2	143.1		397.9	1.21	1.2	1.23	1.22	1.07	1.22	1.21	1.21		1.19	0.89	0.88	0.94	0.91	0.93	0.93	0.95	0.94		0.91
83		Adenosine 5'-diphosphoribose [M-H]- C15H23N5O14P2 NIST 1068491	M-H 1-	558.061										506.8										0.95										0.5
84		LPC 18:3; [M+FA-H]- C26H48NO7P	M+HCOO 1-	562.312		37.3	9.7		30.6							13	13.01		13							0.93	0.86		0.94
85		LPC 18:2; [M+FA-H]- C26H50NO7P	M+HCOO 1-	564.328	137.3	551.7	124.1	67.6	631.6	16.3	17.7		14.8	12.6	13.28	13.28	13.28	13.28	13.29	13.31	13.31		13.31	13.3	0.97	0.96	0.95	0.96	0.97	0.95	0.93		0.95	0.93
86		Uridine 5'-diphosphogalactose [M-H]- C15H24N2O17P2 NIST 1174031---Uridine 5'-diphosphogalactose [M-H]- C15H24N2O17P2 NIST 1174032	M-H 1-	565.045				501.9	749.8				1497.5	333.5				0.94	0.95				0.95	0.95				0.91	0.9				0.91	0.9
87		LPC 18:1; [M+FA-H]- C26H52NO7P	M+HCOO 1-	566.344	18.7	38.8			28.8		14.5				13.68	13.67			13.68		13.8				0.88	0.94			0.94		0.64
88		LPC 18:0; [M+FA-H]- C26H54NO7P	M+HCOO 1-	568.36	65.3	59.4	58.5	56	58.4	60.7	62.3	59.3	59.5	59.7	14.22	14.21	14.22	14.2	14.2	14.21	14.2	14.19	14.22	14.21	0.97	0.96	0.95	0.96	0.98	0.96	0.95	0.95	0.99	0.93
89		LPC 20:4; [M+FA-H]- C28H50NO7P	M+HCOO 1-	588.328	65.2	191.9	62.4	45.3	274.8						13.28	13.26	13.28	13.28	13.27						0.94	0.95	0.96	0.93	0.95
90		LPI 18:0; [M-H]- C27H53O12P	M-H 1-	599.317	69.9	65.5	64.6	62.8	60.7	66.2	71.1	61.2	63	70.5	13.76	13.76	13.77	13.77	13.75	13.78	13.77	13.77	13.76	13.76	0.89	0.89	0.73	0.79	0.82	0.9	0.72	0.78	0.85	0.69
91		Uridine-5-diphosphoacetylgalactosamine C17H27N3O17P2---Uridine-5-diphosphoacetylglucosamine C17H27N3O17P2	M-H 1-	606.071	394.6		786.8	799.5	1450.6				1881.8	512.7	0.98		0.96	0.97	0.97				0.97	0.97	0.62		0.76	0.78	0.78				0.78	0.74
92		Glutathione (oxidized) C20H32N6O12S2---Oxidized glutathione C20H32N6O12S2	M-H 1-	611.142	5239.5	4351.4	4223.7	7130.5	7735.2	2544.4	2723.3	1352.8	4705.1	2763.6	0.96	0.97	0.96	0.97	0.95	0.97	0.97	0.96	0.95	0.97	0.89	0.89	0.89	0.87	0.89	0.89	0.89	0.9	0.9	0.89
93		LPC 22:6; [M+FA-H]- C30H50NO7P	M+HCOO 1-	612.328	15.4	45.5	13.9	9.9	63						13.21	13.22	13.23	13.25	13.22						0.83	0.88	0.83	0.78	0.84
94		LPI 20:4; [M-H]- C29H49O12P	M-H 1-	619.286		12.9		8.7	72.7				49.4			12.9		12.9	12.87				12.88			0.67		0.76	0.77				0.78
95	*	.beta.-Nicotinamide adenine dinucleotide [M-H]- C21H27N7O14P2 NIST 1179489	M-H 1-	662.099	1038.4	189.7	1638.1	1310.4	2182.7	379.9	933.7	27.8,1604.6	60.3,2484.0	1016.3	2.24	2.24	2.21	2.21	2.22	2.2	2.21	1.56,2.23	1.58,2.23	2.21	0.96	0.96	0.96	0.96	0.96	0.97	0.96	0.95,0.96	0.93,0.96	0.96
95	*	ISF of .beta.-Nicotinamide adenine dinucleotide [M-H]- C21H27N7O14P2 NIST 1179489	-	540.051	646.5	116.8	1054.1	850.4	1403.1	227.1	610.5	1030.1	1511.6	638.6	2.24	2.24	2.21	2.21	2.22	2.2	2.21	2.23	2.23	2.21	0.89	0.95	0.94	0.94	0.93	0.92	0.94	0.94	0.94	0.94
96		.beta.-Nicotinamide adenine dinucleotide, reduced [M-H]- C21H29N7O14P2 NIST 1161866	M-H 1-	664.115				17.4	19.2,96.8			33	100.3,595.6	34.7				3.68	4.12,3.70			3.73	4.14,3.71	3.68				0.9	0.92,0.93			0.91	0.94,0.94	0.94
97		Tetrasaccharides (Hex-Hex-Hex-Hex); PlaSMA ID-1820 C24H42O21---Tetrasaccharides (Hex-Hex-Hex-Hex); PlaSMA ID-1917 C24H42O21	M-H 1-	665.212	99.4	46	233.3		212			337.3	589.5	516	1.21	1.22	1.22		1.2			1.21	1.2	1.2	0.51	0.54	0.57		0.53			0.55	0.51	0.51
98		3'-Dephosphocoenzyme A; LC-ESI-QTOF; MS2; CE C21H35N7O13P2S	M-H 1-	686.139									43.2										5.19										0.92
99		2'-Deoxyguanosine 5'-monophosphate [M-H]- C10H14N5O7P NIST 1178796	2M-H 1-	693.116	118.5	95.7	237.4	282	389.9	120.8	67.2	35.7	600.3	270.7	1.3	1.31	1.3	1.31	1.31	1.3	1.3	1.3	1.29	1.31	0.98	0.97	0.99	0.98	0.98	0.99	0.98	0.99	0.98	0.99
100		Inosine 5'-monophosphate [M-H]- C10H13N4O8P NIST 1178897	2M-H 1-	695.084								153.4										1.1										0.94
101		1-Octadecanoyl-2-(9Z,12Z-octadecadienoyl)-sn-glycero-3-phosphate [M-H]- C39H73O8P NIST 1149816	M-H 1-	699.489							285.6										13.9										0.65
102		PA 36:1; PA 18:0-18:1; [M-H]- C39H75O8P	M-H 1-	701.51					558.7		261	413.4	56.3						13.93		14.1	13.9	13.58						0.85		0.68	0.81	0.8
103		Tetrasaccharides (Hex-Hex-Hex-Hex); PlaSMA ID-1820 C24H42O21	M+HCOO 1-	711.218		40	221	267.5	197.4	253.3						1.2	1.19	1.17	1.18	1.19						0.58	0.54	0.57	0.54	0.51
104		PE 34:1; [M-H]-; GPEtn(16:0/18:1(11E)) C39H76NO8P---PE 34:1; [M-H]-; GPEtn(16:0/18:1(11Z)) C39H76NO8P---PE 34:1; [M-H]-; GPEtn(16:0/18:1(13Z)) C39H76NO8P---PE 34:1; [M-H]-; GPEtn(16:0/18:1(17Z)) C39H76NO8P---PE 34:1; [M-H]-; GPEtn(16:0/18:1(4E)) C39H76NO8P---PE 34:1; [M-H]-; GPEtn(16:0/18:1(6Z)) C39H76NO8P---PE 34:1; [M-H]-; GPEtn(16:0/18:1(7Z)) C39H76NO8P---PE 34:1; [M-H]-; GPEtn(16:0/18:1(9E)) …	M-H 1-	716.521										1520.5										13.96										0.93
105		.beta.-Nicotinamide adenine dinucleotide phosphate [M-H]- C21H28N7O17P3 NIST 1180408	M-H 1-	742.066			138	153.9	302.6				480.1				1.1	1.11	1.09				1.09				0.92	0.93	0.93				0.93
106		PE 36:2; PE 18:0-18:2; [M-H]- C41H78NO8P---PE 36:2; [M-H]-; GPEtn(18:0/18:2(2E,4E)) C41H78NO8P---PE 36:2; [M-H]-; GPEtn(18:0/18:2(6Z,9Z)) C41H78NO8P---PE 36:2; [M-H]-; GPEtn(18:0/18:2(9E,10E)) C41H78NO8P---PE 36:2; [M-H]-; GPEtn(18:0/18:2(9E,12E)) C41H78NO8P---PE 36:2; [M-H]-; GPEtn(18:0/18:2(9Z,11Z)) C41H78NO8P---PE 36:2; [M-H]-; GPEtn(18:0/18:2(9Z,12Z)) C41H78NO8P---PE 36:2; [M-H]-; GPEtn(18:2(…	M-H 1-	742.537					27.1		5607.7			2345.7					13.98		14.49			13.67					0.62		0.94			0.87
107		PE 36:1; [M-H]-; GPEtn(18:0/18:1(11E)) C41H80NO8P---PE 36:1; [M-H]-; GPEtn(18:0/18:1(11Z)) C41H80NO8P---PE 36:1; [M-H]-; GPEtn(18:0/18:1(13Z)) C41H80NO8P---PE 36:1; [M-H]-; GPEtn(18:0/18:1(17Z)) C41H80NO8P---PE 36:1; [M-H]-; GPEtn(18:0/18:1(4E)) C41H80NO8P---PE 36:1; [M-H]-; GPEtn(18:0/18:1(6Z)) C41H80NO8P---PE 36:1; [M-H]-; GPEtn(18:0/18:1(7Z)) C41H80NO8P---PE 36:1; [M-H]-; GPEtn(18:0/18:1(9E)) …	M-H 1-	744.552	124.5	368.4									13.75	13.65									0.73	0.83
108		PE 38:5e; PE 16:1e/22:4; [M-H]- C43H78NO7P---plasmenyl-PE 38:4; [M-H]-; PE(P-16:0/22:4(7Z,10Z,13Z,16Z)) C43H78NO7P	M-H 1-	750.541							191.2		29.2	394.2							13.76		13.29	14.5							0.98		0.84	0.94
109		plasmenyl-PE 38:4; [M-H]-; PE(P-18:0/20:4(5E,8E,11E,14E)) C43H78NO7P---plasmenyl-PE 38:4; [M-H]-; PE(P-18:0/20:4(5Z,8Z,11Z,14Z)) C43H78NO7P---plasmenyl-PE 38:4; [M-H]-; PE(P-18:0/20:4(7E,10E,13E,16E)) C43H78NO7P	M-H 1-	750.541					794.3		1190.6		604.9						14.25		14.58		14.14						0.98		0.72		0.95
110		PC 32:0e; PC 16:0e/16:0; [M+FA-H]- C40H82NO7P	M+HCOO 1-	764.579							46.6		228.5	124.7							13.84		13.92	14.54							0.71		0.78	0.8
111		Coenzyme A [M-H]- C21H36N7O16P3S NIST 1162190	M-H 1-	766.106									42.2										4.42										0.91
112		PE 38:4; PE 18:0-20:4; [M-H]- C43H78NO8P---PE 38:4; [M-H]-; GPEtn(18:0/20:4(5E,8E,11E,14E)) C43H78NO8P---PE 38:4; [M-H]-; GPEtn(18:0/20:4(5Z,8Z,11Z,14Z)) C43H78NO8P---PE 38:4; [M-H]-; GPEtn(18:0/20:4(7E,10E,13E,16E)) C43H78NO8P---PE 38:4; [M-H]-; GPEtn(20:4(5E,8E,11E,14E)/18:0) C43H78NO8P---PE 38:4; [M-H]-; GPEtn(20:4(5Z,8Z,11Z,14Z)/18:0) C43H78NO8P---PE 38:4; [M-H]-; GPEtn(20:4(7E,10E,13E,16E)/1…	M-H 1-	766.537							2902.7			38468.7							13.7			14.52							0.83			0.93
113		PE 38:3; [M-H]-; GPEtn(18:0/20:3(5Z,8Z,11Z)) C43H80NO8P---PE 38:3; [M-H]-; GPEtn(18:0/20:3(8Z,11Z,14Z)) C43H80NO8P---PE 38:3; [M-H]-; GPEtn(20:3(5Z,8Z,11Z)/18:0) C43H80NO8P---PE 38:3; [M-H]-; GPEtn(20:3(8Z,11Z,14Z)/18:0) C43H80NO8P	M-H 1-	768.552					1485.1			87	65.2						14.38			13.92	13.49						0.93			0.89	0.62
114		PE 38:3; PE 18:0-20:3; [M-H]- C43H80NO8P	M-H 1-	768.551					64		804.5		769.8						13.22		14.58		14.14						0.85		0.79		0.77
115		PE 38:2; [M-H]-; GPEtn(18:2(2E,4E)/20:0) C43H82NO8P---PE 38:2; [M-H]-; GPEtn(18:2(6Z,9Z)/20:0) C43H82NO8P---PE 38:2; [M-H]-; GPEtn(18:2(9E,10E)/20:0) C43H82NO8P---PE 38:2; [M-H]-; GPEtn(18:2(9E,12E)/20:0) C43H82NO8P---PE 38:2; [M-H]-; GPEtn(18:2(9Z,11Z)/20:0) C43H82NO8P---PE 38:2; [M-H]-; GPEtn(18:2(9Z,12Z)/20:0) C43H82NO8P---PE 38:2; [M-H]-; GPEtn(20:0/18:2(2E,4E)) C43H82NO8P---PE 38:2; [M-H]-; …	M-H 1-	770.564										715										14.14										0.57
116		plasmenyl-PE 40:6; [M-H]-; PE(P-18:0/22:6(4Z,7Z,10Z,13Z,16Z,19Z)) C45H78NO7P	M-H 1-	774.541							282.4										14.56										0.91
117		PE 40:7e; PE 18:1e/22:6; [M-H]- C45H78NO7P	M-H 1-	774.542							108.3			193.4							13.82			13.8							0.64			0.79
118		PE 40:6e; PE 18:1e/22:5; [M-H]- C45H80NO7P---PE 40:6e; PE 18:2e/22:4; [M-H]- C45H80NO7P	M-H 1-	776.556					226.2			55.3	79.8	50.7					14.14			13.83	13.91	14.68					0.79			0.8	0.76	0.85
119		PE 39:4; PE 19:0-20:4; [M-H]- C44H80NO8P---PE 39:4; [M-H]-; GPEtn(19:0/20:4(5E,8E,11E,14E)) C44H80NO8P---PE 39:4; [M-H]-; GPEtn(19:0/20:4(5Z,8Z,11Z,14Z)) C44H80NO8P---PE 39:4; [M-H]-; GPEtn(19:0/20:4(7E,10E,13E,16E)) C44H80NO8P---PE 39:4; [M-H]-; GPEtn(20:4(5E,8E,11E,14E)/19:0) C44H80NO8P---PE 39:4; [M-H]-; GPEtn(20:4(5Z,8Z,11Z,14Z)/19:0) C44H80NO8P---PE 39:4; [M-H]-; GPEtn(20:4(7E,10E,13E,16E)/1…	M-H 1-	780.552							150.9	45.1	327.8								14.05	13.56	14.64								0.84	0.81	0.84
120		FAD C27H33N9O15P2 MassBank 5112	M-H 1-	784.147	27.1	30	68.2	96.2	204.7	9	15.7	33.9	621.1	46.1	6.14	6.14	6.15	6.14	6.15	6.16	6.13	6.14	6.14	6.14	0.89	0.93	0.95	0.94	0.93	0.79	0.9	0.92	0.93	0.92
121		1-Octadecanoyl-2-(9Z-octadecenoyl)-sn-glycero-3-phosphoserine [M-H]- C42H80NO10P NIST 1197087	M-H 1-	788.541										357.6										13.78										0.88
122		PE 40:6; PE 18:0-22:6; [M-H]- C45H78NO8P	M-H 1-	790.537										211.9										13.76										0.64
123		PE 40:5; [M-H]-; GPEtn(18:0/22:5(4Z,7Z,10Z,13Z,16Z)) C45H80NO8P---PE 40:5; [M-H]-; GPEtn(18:0/22:5(7Z,10Z,13Z,16Z,19Z)) C45H80NO8P---PE 40:5; [M-H]-; GPEtn(22:5(4Z,7Z,10Z,13Z,16Z)/18:0) C45H80NO8P---PE 40:5; [M-H]-; GPEtn(22:5(7Z,10Z,13Z,16Z,19Z)/18:0) C45H80NO8P	M-H 1-	792.551					384.5		1486		174.4						13.93		13.86		14.4						0.8		0.69		0.78
124		PE 40:5; PE 18:0-22:5; [M-H]- C45H80NO8P	M-H 1-	792.552									247.7	1023									13.88	14.52									0.62	0.57
125		PE 40:4; PE 18:0-22:4; [M-H]- C45H82NO8P	M-H 1-	794.565					116.9										14.73										0.65
126		PE 40:4; PE 20:0-20:4; [M-H]- C45H82NO8P	M-H 1-	794.569		75.2				355						13.8				13.93						0.8				0.87
127		PE 40:4; [M-H]-; GPEtn(18:0/22:4(7Z,10Z,13Z,16Z)) C45H82NO8P---PE 40:4; [M-H]-; GPEtn(20:0/20:4(5E,8E,11E,14E)) C45H82NO8P---PE 40:4; [M-H]-; GPEtn(20:0/20:4(5Z,8Z,11Z,14Z)) C45H82NO8P---PE 40:4; [M-H]-; GPEtn(20:0/20:4(7E,10E,13E,16E)) C45H82NO8P---PE 40:4; [M-H]-; GPEtn(20:4(5E,8E,11E,14E)/20:0) C45H82NO8P---PE 40:4; [M-H]-; GPEtn(20:4(5Z,8Z,11Z,14Z)/20:0) C45H82NO8P---PE 40:4; [M-H]-; GPEtn(20…	M-H 1-	794.568		300.3						136.3				14.18						14.57				0.82						0.79
128		SM d38:1; SM d14:0/24:1; [M+FA-H]- C43H87N2O6P	M+HCOO 1-	803.625								548.6	65									13.86	14.72									0.91	0.89
129		PC 34:0; PC 16:0-18:0; [M+FA-H]- C42H84NO8P	M+HCOO 1-	806.588					507.1			558							13.95			14.08							0.84			0.86
130		PC 35:1; PC 17:0-18:1; [M+FA-H]- C43H84NO8P	M+HCOO 1-	818.588							264.8		158.5	56.4							13.88		13.85	14.19							0.74		0.77	0.67
131		PC 36:2; PC 18:1-18:1; [M+FA-H]- C44H84NO8P	M+HCOO 1-	830.588										1808.8										13.35										0.83
132		PC 36:2; PC 18:0-18:2; [M+FA-H]- C44H84NO8P	M+HCOO 1-	830.589									376.1	40171.9									13.81	14.54									0.84	0.88
133		PC 36:1; PC 18:0-18:1; [M+FA-H]- C44H86NO8P	M+HCOO 1-	832.604	1362.7,2930.4							1378.5			13.12,13.87							14.15			0.86,0.87							0.86
134		PC 36:1; PC 16:0-20:1; [M+FA-H]- C44H86NO8P	M+HCOO 1-	832.604					220.8										14.68										0.77
135		PC 37:2; PC 19:0-18:2; [M+FA-H]- C45H86NO8P	M+HCOO 1-	844.604							63.5	133	450								14.12	13.77	14.44								0.68	0.79	0.84
136		PC 38:3; PC 18:0-20:3; [M+FA-H]- C46H86NO8P	M+HCOO 1-	856.604					337.6		1770.6	273.3	1570.9	1152.8					13.38		14.72	14.13	13.62	14.7					0.84		0.87	0.83	0.87	0.81
137		PC 38:2; PC 18:1-20:1; [M+FA-H]- C46H88NO8P	M+HCOO 1-	858.619	768.1										14.54										0.73
138		PC 38:2; PC 18:0-20:2; [M+FA-H]- C46H88NO8P---PC 38:2; PC 20:0-18:2; [M+FA-H]- C46H88NO8P	M+HCOO 1-	858.62	61.9	29.3				547					13.62	13.19				14.07					0.74	0.73				0.85
139		PC 39:4; PC 19:0-20:4; [M+FA-H]- C47H86NO8P	M+HCOO 1-	868.604							292.7		76.3								14.12		14.07								0.79		0.82
140		Pentasaccharides (Hex-Hex-Hex-Hex-Hex); PlaSMA ID-2086 C30H52O26	M+HCOO 1-	873.27									52.3										1.29										0.51
141		PC 40:5; PC 18:0-22:5; [M+FA-H]- C48H86NO8P	M+HCOO 1-	880.604							294.2		407.6	1169.7							14.6		13.97	14							0.81		0.81	0.77
142		PC 40:4; PC 20:0-20:4; [M+FA-H]- C48H88NO8P	M+HCOO 1-	882.619	326.8										13.97										0.84
143		1-Octadecanoyl-2-(5Z,8Z,11Z,14Z-eicosatetraenoyl)-sn-glycero-3-phospho-(1'-myo-inositol) [M-H]- C47H83O13P NIST 1148659---1-Octadecanoyl-2-(5Z,8Z,11Z,14Z-eicosatetraenoyl)-sn-glycero-3-phospho-(1'-myo-inositol) [M-H]- C47H83O13P NIST 1148666	M-H 1-	885.548	127.6								42.8		14.73								14.74		0.59								0.52

## Sheet: MetaboKit-Neg-Org
group	ISF	name	adduct	feature_m/z	KO1	KO2	KO3	KO4	KO5	WT1	WT2	WT3	WT4	WT5	RT_KO1	RT_KO2	RT_KO3	RT_KO4	RT_KO5	RT_WT1	RT_WT2	RT_WT3	RT_WT4	RT_WT5	score_KO1	score_KO2	score_KO3	score_KO4	score_KO5	score_WT1	score_WT2	score_WT3	score_WT4	score_WT5
1		3-carboxy-2,3-dihydroxypropanoate C4H6O6 MoNA 440050	M-H 1-	149.009			915.2			886.9		428		870.1			10.07			10.05		9.91		10.07			0.87			0.61		0.63		0.62
2		Terephthalic acid [M-H]- C8H6O4 NIST 1186095	M-H 1-	165.022	75.8										9.78										0.64
3		2(3H)-Benzothiazolethione C7H5NS2 MoNA 436441	M-H 1-	165.979		38.9										0.37										0.96
4		CITRATE C6H8O7	M-H 1-	191.02	1914.8	6749.7	6743.6	5191.2	3674.6	9666.5	5028.3	5012.4	14919.6	5570.7	0.48	9.99	10.01	9.91	1.17	10.35	0.62	9.92	10.14	9.95	0.79	0.77	0.76	0.78	0.77	0.6	0.72	0.8	0.84	0.8
5		Citric acid (Not validated, isomer of 228); PlaSMA ID-227 C6H8O7	M-H 1-	191.019										4973.6										0.58										0.53
6		2-Naphthalenesulfonic acid; LC-ESI-ITFT; MS2; CE C10H8O3S	M-H 1-	207.012						22.3				18.9						0.3				0.32						0.67				0.99
7		Diuron; LC-ESI-ITFT; MS2; CE C9H10Cl2N2O	M-H 1-	231.009	47.2					190	81.4			39.7	0.45					0.45	0.45			0.45	0.84					0.95	0.94			0.85
8		Dodecyl sulfate; PlaSMA ID-444 C12H26O4S	M-H 1-	265.148	158.7	50.7	53.8	78	36	104.6	144.1	113.7	44.8	164.1	0.79	0.77	0.77	0.77	0.79	0.79	0.78	0.79	0.78	0.78	0.74	0.74	0.73	0.74	0.73	0.75	0.73	0.73	0.73	0.74
9		C14-SAS (TENTATIVE) C14H30O3S	M-H 1-	277.184	333.2				566.3				185.1		0.83				0.85				0.85		0.98				0.98				0.99
10		9(10)-EpOME [M-H-H2O]- C18H32O3 NIST 1138290	M-H2O-H 1-	277.217	2993.9				6233.3						1.96				1.97						0.58				0.73
11		13-Hydroperoxy-9Z,11E-octadecadienoic acid [M-H-H2O]- C18H32O4 NIST 1134465	M-H2O-H 1-	293.212			2193.3										1.08										0.74
11		13-Keto-9Z,11E-octadecadienoic acid [M-H]- C18H30O3 NIST 1137228---13-Keto-9Z,11E-octadecadienoic acid [M-H]- C18H30O3 NIST 1137229	M-H 1-	293.212				2041.9	6107.7									1.07	1.08									0.67	0.64
12		12(13)-Epoxy-9Z-octadecenoic acid [M-H]- C18H32O3 NIST 1138353---12(13)-Epoxy-9Z-octadecenoic acid [M-H]- C18H32O3 NIST 1138354---13-HODE [M-H]- C18H32O3 NIST 1129343	M-H 1-	295.227		1030.6		409.8	1386.4							1.02		1.03	1.04							0.82		0.7	0.83
12		9,10-Dihydroxy-12Z-octadecenoic acid [M-H-H2O]- C18H34O4 NIST 1142687---Unknown (carbon number 18); PlaSMA ID-572 C18H34O4	M-H2O-H 1-	295.227	228.4		641.6								1.03		1.04								0.54		0.86
13		C10-LAS (STANDARD MIX) C16H26O3S	M-H 1-	297.152	325.4	205.4	114.6	294.2	146.8	475.7	379.2	384.6	154	412.4	0.83	0.83	0.84	0.83	0.83	0.83	0.85	0.84	0.83	0.85	0.87	0.87	0.84	0.84	0.86	0.88	0.87	0.9	0.87	0.87
14		14,15-EE-(5Z)-E [M-H]- C20H36O3 NIST 1138753	M-H2O-H 1-	305.248				6477	6981.8									2.44	2.41									0.86	0.84
15		C12-AE1S (TENTATIVE) C14H30O5S	M-H 1-	309.173							97.8	76.6	29.7								1.03	1.03	1.03								0.83	0.87	0.85
16		FA 18:2+3O; PlaSMA ID-717 C18H32O5	M-H2O-H 1-	309.206		414.5										0.64										0.6
16		trans-EKODE-(E)-Ib [M-H]- C18H30O4 NIST 1138699	M-H 1-	309.206			613.1										0.62										0.51
17		C11-LAS (STANDARD MIX) C17H28O3S	M-H 1-	311.168	1971.3	1359.3	912.8	751.3,2241.0	1253.7,1011.4	2977.5	2354.3	2394.2	1020.3	2521.6	1.1	1.09	1.08	2.53,1.09	1.10,2.52	1.1	1.11	1.11	1.09	1.11	0.86	0.84	0.86	0.80,0.81	0.82,0.86	0.88	0.87	0.85	0.85	0.86
18		FA 18:1+3O; PlaSMA ID-735 C18H34O5	M-H2O-H 1-	311.222					1301.4										0.56										0.58
19		FAHFA 18:0; FAHFA 16:0/2:0; [M-H]- C18H34O4	M-H 1-	313.238	513.5	1077	2221.9	890.9	1647.7	83.3	130.9		168.1	184.1	1.71	1.71	1.71	1.7	1.71	1.71	1.72		1.72	1.73	0.77	0.8	0.79	0.87	0.81	0.66	0.79		0.68	0.59
20		17,18-DiHETE [M-H]- C20H32O4 NIST 1138857	M-H2O-H 1-	317.212					1008.4										1.21										0.77
21		4-Dodecylbenzenesulfonic Acid C18H30O3S MoNA 440645---Dodecylbenzenesulfonic acid C18H30O3S	M-H 1-	325.184	2187.3	1576.3	1142.4	2287.2,846.1	1245	3268.5	2639.8,233.8	2737.4	1316.6	2724.4	1.35	1.36	1.35	1.37,2.53	1.35	1.35	1.38,2.87	1.37	1.36	1.37	0.91	0.9	0.88	0.89,0.92	0.91	0.83	0.88,0.93	0.87	0.88	0.88
22		2,3-Dinor 11.beta.-prostaglandin F2.alpha. [M-H]- C18H30O5 NIST 1134960	M-H 1-	325.2	6.3		132.1		269.6						0.33		0.33		0.35						0.57		0.57		0.57
23		Linoleic acid C18H32O2 MoNA 436606	M+HCOO 1-	325.237				33.4										2.25										0.86
24		Heneicosanoic acid C21H42O2	M-H 1-	325.31	11.4	42.5	30.4	27.7	40.9				29.9	26.6	3.04	3.05	3.04	3.02	3.04				3.05	3.05	0.74	0.75	0.52	0.85	0.78				0.79	0.76
25		cis-4,7,10,13,16,19-Docosahexaenoic acid [M-H]- C22H32O2 NIST 1133565---cis-4,7,10,13,16,19-Docosahexaenoic acid [M-H]- C22H32O2 NIST 1133566---cis-4,7,10,13,16,19-Docosahexaenoic acid [M-H]- C22H32O2 NIST 1133567	M-H 1-	327.233	17734.4		8994.9	11337.7	26048.8						2.11		2.09	2.1	2.09						0.85		0.76	0.73	0.78
26		Elaidic acid C18H34O2 MoNA 440469---Oleic acid C18H34O2 MoNA 440469---Trans-Vaccenic acid C18H34O2	M+HCOO 1-	327.253	77.7	51.9	106.1		157.6						2.55	2.56	2.56		2.56						0.94	0.92	0.91		0.92
27		FA 18:1+3O; PlaSMA ID-735 C18H34O5---FA 18:1+3O; PlaSMA ID-738 C18H34O5	M-H 1-	329.233	202.6	1621	612.4	339.6	1060.2	31.2					0.36	0.35	0.35	0.35	0.35	0.34					0.68	0.78	0.64	0.63	0.77	0.56
28		Carbocyclic thromboxane A2 [M-H]- C22H36O3 NIST 1207545	M-H2O-H 1-	329.248					7011.3										2.33										0.56
29		Stearic acid C18H36O2 Bruker-Sumner MetaboBASE Plant Library 373951---Stearic acid C18H36O2 MoNA 440441---Stearic acid C18H36O2 MoNA 440442	M+HCOO 1-	329.269	55.7			68.8	67.9	57.2	57.5	55.9	43.9	57.1	2.87			2.87	2.87	2.86	2.87	2.88	2.86	2.87	0.92			0.92	0.91	0.91	0.92	0.94	0.91	0.92
30		Docosatetraenoic acid C22H36O2---cis-4,10,13,16-Docosatetraenoic acid [M-H]- C22H36O2 NIST 1133742	M-H 1-	331.264				2848.6	4099.6									2.55	2.56									0.86	0.63
31		15(S)-HpETE [M-H-H2O]- C20H32O4 NIST 1137376	M-H 1-	335.222					146.7										1.19										0.5
32		15-Ketoiloprost [M-H-H2O]- C22H30O4 NIST 1206812	M-H2O-H 1-	339.199	614.8,1579.6	265.9,703.8,1192.2	936.6	668.5,1673.6	802.6,936.2	446.8,2145.2	1827.4	2013.7	1082.5	256.6,2080.4	2.53,1.60	2.88,0.96,1.61	1.61	1.20,1.62	2.52,1.61	1.21,1.61	1.61	1.62	1.62	2.87,1.62	0.72,0.78	0.72,0.75,0.77	0.79	0.72,0.80	0.67,0.76	0.73,0.77	0.76	0.8	0.77	0.74,0.77
33		2,2'-Methylene-bis(6-tert-butyl-4 methylphenol) [M-H]- C23H32O2 NIST 1202717---2,2'-Methylene-bis(6-tert-butyl-4 methylphenol) [M-H]- C23H32O2 NIST 1202718	M-H 1-	339.232	291	262.2	238.6		220.8	199.5	161.2		164.3	170.7	2.31	2.32	2.32		2.33	2.39	2.37		2.37	2.36	0.5	0.65	0.67		0.62	0.61	0.6		0.64	0.58
34		Trehalose C12H22O11	M-H 1-	341.108				35.4		34.9			38.7					9.71		9.71			9.72					0.82		0.82			0.82
35		FAHFA 20:0; FAHFA 18:0/2:0; [M-H]- C20H38O4	M-H 1-	341.269		87.6	226.4		183.3		19.4					2.18	2.15		2.18		2.19					0.6	0.78		0.72		0.68
36		11-Dehydrothromboxane B2 [M-H]- C20H32O6 NIST 1207613	M-H2O-H 1-	349.201					338.3										0.41										0.74
37		19(R)-Hydroxyprostaglandin F2.alpha. [M-H]- C20H34O6 NIST 1132371	M-H2O-H 1-	351.217					285.2										0.41										0.54
38		5-iPF2.alpha.-VI [M-H-H2O]- C20H34O5 NIST 1134919	M-H 1-	353.232		205.8										0.39										0.69
39		15(R),19(R)-Hydroxyprostaglandin E2 [M-H-H2O]- C20H32O6 NIST 1142205	M-H 1-	367.211			115.2										0.35										0.61
40		Maltose C12H22O11---SUCROSE C12H22O11	M+HCOO 1-	387.113	98.4	93.4	89	265.0,96.6	208.3,89.4	87.5	87.6	88.1	95.4		9.72	9.71	9.71	6.55,9.71	6.52,9.72	9.71	9.71	9.72	9.72		0.81	0.87	0.8	0.87,0.91	0.74,0.75	0.78	0.81	0.76	0.81
41		Trehalose C12H22O11	M+HCOO 1-	387.114							10.7			206							0.3			6.46							0.74			0.82
42		PG 38:5; PG 16:0-22:5; [M-H]- C44H77O10P	M-2H 2-	397.258					164.4										2.26										0.52
43		lysoPE 16:1; [M-H]-; PE(16:1(7Z)/0:0) C21H42NO7P---lysoPE 16:1; [M-H]-; PE(16:1(9Z)/0:0) C21H42NO7P	M-H 1-	450.261			63.7		129.4								1.44		1.44								0.92		0.95
44		1-Palmitoyl-2-hydroxy-sn-glycero-3-phosphoethanolamine [M-H]- C21H44NO7P NIST 1151422---1-Palmitoyl-2-hydroxy-sn-glycero-3-phosphoethanolamine [M-H]- C21H44NO7P NIST 1151423---1-Palmitoyl-2-hydroxy-sn-glycero-3-phosphoethanolamine [M-H]- C21H44NO7P NIST 1151424	M-H 1-	452.277	511	463	459.4	554.4	958.2	106.1	79.5		227.6	231.3	1.83	1.82	1.84	1.83	1.84	1.84	1.82		1.83	1.83	0.99	0.99	0.99	0.99	0.99	0.99	0.99		0.98	0.98
45		.alpha.-Muricholic acid [2M-H]- C24H40O5 NIST 1165432	M+HCOO 1-	453.284								34.8		27								0.37		0.35								0.98		0.97
46		Cholesterol 3-sulfate [M-H]- C27H46O4S NIST 1062158---Cholesterol 3-sulfate [M-H]- C27H46O4S NIST 1062162	M-H 1-	465.303	179.1		169.2			117.6	100				2.53		2.54			2.53	2.54				0.98		0.73			0.97	0.97
47		lysoPE 18:2; [M-H]-; PE(18:2(2E,4E)/0:0) C23H44NO7P---lysoPE 18:2; [M-H]-; PE(18:2(6Z,9Z)/0:0) C23H44NO7P---lysoPE 18:2; [M-H]-; PE(18:2(9E,10E)/0:0) C23H44NO7P---lysoPE 18:2; [M-H]-; PE(18:2(9E,12E)/0:0) C23H44NO7P---lysoPE 18:2; [M-H]-; PE(18:2(9Z,11Z)/0:0) C23H44NO7P---lysoPE 18:2; [M-H]-; PE(18:2(9Z,12Z)/0:0) C23H44NO7P	M-H 1-	476.277	386.3	1072.9		163.6	1178.8	23.6		94.9		27.7	1.54	1.53		1.53	1.52	1.54		1.54		1.52	0.96	0.98		0.98	0.97	0.96		0.96		0.99
48		1-(9Z-Octadecenoyl)-sn-glycero-3-phosphoethanolamine [M-H]- C23H46NO7P NIST 1149948---1-(9Z-Octadecenoyl)-sn-glycero-3-phosphoethanolamine [M-H]- C23H46NO7P NIST 1149949---1-(9Z-Octadecenoyl)-sn-glycero-3-phosphoethanolamine [M-H]- C23H46NO7P NIST 1149951---1-(9Z-Octadecenoyl)-sn-glycero-3-phosphoethanolamine [M-H]- C23H46NO7P NIST 1149952	M-H 1-	478.293	738.5	546.7	530.6	636.1	1139	66.9	50.2	253.3	144.9	134.1	1.94	1.94	1.94	1.93	1.94	1.94	1.93	1.9	1.93	1.94	0.99	0.99	0.99	0.99	0.99	0.98	0.98	0.96	0.99	0.99
49		1-Stearoyl-2-hydroxy-sn-glycero-3-phosphoethanolamine [M-H]- C23H48NO7P NIST 1151473---1-Stearoyl-2-hydroxy-sn-glycero-3-phosphoethanolamine [M-H]- C23H48NO7P NIST 1151474---1-Stearoyl-2-hydroxy-sn-glycero-3-phosphoethanolamine [M-H]- C23H48NO7P NIST 1151476	M-H 1-	480.309	619.6	431.9	501.4	581.2	1076.7	114.1	72.6	278.1	218.3	216	2.27	2.28	2.28	2.29	2.28	2.28	2.28	2.28	2.29	2.3	0.99	0.99	0.99	0.99	0.99	0.98	0.98	0.97	0.98	0.93
50		FAHFA 30:0; FAHFA 16:0/14:0; [M-H]- C30H58O4	M-H 1-	481.424	22.1										3.87										0.97
51		LPE 20:4; [M-H]- C25H44NO7P---lysoPE 20:4; [M-H]-; PE(20:4(5E,8E,11E,14E)/0:0) C25H44NO7P---lysoPE 20:4; [M-H]-; PE(20:4(5Z,8Z,11Z,14Z)/0:0) C25H44NO7P---lysoPE 20:4; [M-H]-; PE(20:4(7E,10E,13E,16E)/0:0) C25H44NO7P	M-H 1-	500.277	826.8	2332.7	960	547.5	2369.1	72.3	45.3	85.7	177.1	244.3	1.52	1.53	1.52	1.51	1.52	1.52	1.5	1.52	1.51	1.52	0.88	0.86	0.88	0.89	0.87	0.87	0.91	0.84	0.86	0.89
52		lysoPE 20:3; [M-H]-; PE(20:3(5Z,8Z,11Z)/0:0) C25H46NO7P---lysoPE 20:3; [M-H]-; PE(20:3(8Z,11Z,14Z)/0:0) C25H46NO7P	M-H 1-	502.29		172			296							1.71			1.58							0.93			0.95
53		Palmitelaidic acid C16H30O2 MoNA 440480---cis-7-Hexadecenoic acid [M-H]- C16H30O2 NIST 1208139	2M-H 1-	507.441	117	41.3	167	362.5	251.3						2.11	2.11	2.11	2.1	2.11						0.99	0.99	0.95	0.98	0.99
54		LPE 20:0; [M-H]- C25H52NO7P	M-H 1-	508.346					33										2.67										0.8
55		FAHFA 32:0; FAHFA 16:0/16:0; [M-H]- C32H62O4	M-H 1-	509.457					33.4										4.2										0.93
56		Palmitic acid C16H32O2 Bruker-Sumner MetaboBASE Plant Library 373612---Palmitic acid C16H32O2 Bruker-Sumner MetaboBASE Plant Library 373613	2M-H 1-	511.472	184	405.2	252.8	183.2	281.3	202.6	178.8	186.2	150.8		2.46	2.47	2.48	2.46	2.45	2.47	2.46	2.47	2.45		0.93	0.93	0.93	0.95	0.93	0.95	0.94	0.93	0.94
57		LPE 22:6; [M-H]- C27H44NO7P	M-H 1-	524.277	424.1	1217.6	399.9	189.3	1111.1		20.2	178.8	58	69.7	1.48	1.48	1.48	1.47	1.48		1.48	1.48	1.47	1.48	0.58	0.64	0.6	0.52	0.71		0.62	0.55	0.77	0.75
58		LPE 22:5; [M-H]- C27H46NO7P---lysoPE 22:5; [M-H]-; PE(22:5(4Z,7Z,10Z,13Z,16Z)/0:0) C27H46NO7P---lysoPE 22:5; [M-H]-; PE(22:5(7Z,10Z,13Z,16Z,19Z)/0:0) C27H46NO7P	M-H 1-	526.29	78.8	220.9	74.3								1.6	1.59	1.63								0.93	0.85	0.98
59		lysoPE 22:4; [M-H]-; PE(22:4(7Z,10Z,13Z,16Z)/0:0) C27H48NO7P	M-H 1-	528.309						10.5			34.3							1.92			1.89							0.87			0.89
60		FAHFA 34:0; FAHFA 16:0/18:0; [M-H]- C34H66O4	M-H 1-	537.488	33.7	31.7			37.5					22.6	2.55	2.53			2.54					4.54	0.67	0.69			0.65					0.91
61		LPC 16:1; [M+FA-H]- C24H48NO7P	M+HCOO 1-	538.314	153.5	400	215.7	155.5		30	24.7	14.1	65.9	37.7	1.35	1.3	1.33	1.35		1.39	1.4	1.38	1.36	1.37	0.94	0.88	0.87	0.82		0.81	0.72	0.86	0.8	0.84
62		LPC 16:0; [M+FA-H]- C24H50NO7P	M+HCOO 1-	540.33	2571.6	2454.3	3203.9	3183.1	4231.4	1204.1	990.9	869.8	2922.5	2182.3	1.77	1.78	1.77	1.76	1.77	1.78	1.76	1.77	1.76	1.77	0.93	0.93	0.92	0.92	0.92	0.92	0.92	0.92	0.92	0.92
63		LPC 17:0; [M+FA-H]- C25H52NO7P	M+HCOO 1-	554.345	53.4		56.1		92.6	28.7	21.8	22.5	78.6	40	2		2.01		2.01	1.98	2.01	2.01	1.99	2	0.83		0.99		0.91	0.81	0.95	0.94	0.92	0.84
64		Pinolenic acid [M-H]- C18H30O2 NIST 1208097	2M-H 1-	555.441	39.5		19.5		88.1						1.96		1.96		1.97						0.99		0.95		0.98
65		Linoleic acid C18H32O2 MoNA 436606	2M-H 1-	559.472	963.8	294.8	868.9	722	2044.4						2.25	2.26	2.26	2.25	2.24						0.99	0.99	1	0.99	1
66		1-(9Z,12Z,15Z-Octadecatrienoyl)-2-hydroxy-sn-glycero-3-phosphocholine (NMR) C26H48NO7P---LPC 18:3; [M+FA-H]- C26H48NO7P	M+HCOO 1-	562.314		299.2	95.7	43	270							1.21	1.21	1.2	1.21							0.88	0.83	0.76	0.86
67		Elaidic acid C18H34O2 MoNA 440469---Oleic acid C18H34O2 MoNA 440469---Trans-Vaccenic acid C18H34O2	2M-H 1-	563.504	967.8		1054.1	1277.4	1888.3						2.55		2.56	2.55	2.59						0.94		0.92	0.92	0.94
68		1-(9Z,12Z-Octadecadienoyl-2-hydroxy-sn-glycero-3-phosphocholine (NMR) C26H50NO7P---1-Hydroxy-2-(9Z,12Z,15Z-octadecatrienoyl)-sn-glycero-2-phosphocholine (NMR) C26H50NO7P---LPC 18:2; [M+FA-H]- C26H50NO7P	M+HCOO 1-	564.331	3296.8	14786.3	4168.8	1832.4	12924.2	368.9	325.8		884.2	366.5	1.46	1.46	1.46	1.45	1.46	1.48	1.48		1.49	1.48	0.89	0.9	0.91	0.89	0.91	0.87	0.91		0.89	0.86
69		LPC 18:1; [M+FA-H]- C26H52NO7P	M+HCOO 1-	566.346	1026	2473.9	1402.6	1183.2	2438.9	315.9	260.9	160.6	667	366.5	1.83	1.8	1.82	1.83	1.82	1.86	1.84	1.85	1.85	1.85	0.86	0.88	0.88	0.88	0.88	0.94	0.93	0.86	0.9	0.93
70		Stearic acid C18H36O2 Bruker-Sumner MetaboBASE Plant Library 373949---Stearic acid C18H36O2 MoNA 440441	2M-H 1-	567.535	378.6	408.5	374.7	390.7	340.1	382.2	416.8	273.8	277.1	329	2.87	2.86	2.86	2.87	2.87	2.86	2.87	2.86	2.86	2.85	0.92	0.92	0.92	0.92	0.92	0.93	0.92	0.94	0.93	0.92
71		LPC 18:0; [M+FA-H]- C26H54NO7P	M+HCOO 1-	568.362	1770.9	1332	2183.9	2266.3	2785.2	773.2	647	675.3	1854.6	1421.9	2.23	2.22	2.22	2.23	2.22	2.22	2.22	2.24	2.22	2.23	0.93	0.95	0.94	0.94	0.94	0.94	0.94	0.94	0.94	0.94
72	*	FAHFA 38:6; FAHFA 18:2/20:4; [M-H]- C38H62O4	M-H 1-	581.455	236.5	100	208.8	168.8	348.9						2.25	2.26	2.26	2.25	2.24						0.91	0.92	0.92	0.92	0.91
72	*	ISF of FAHFA 38:6; FAHFA 18:2/20:4; [M-H]- C38H62O4	-	279.235			26802.7		59699.2								2.26		2.26								0.98		0.99
73		LPC 19:0; [M+FA-H]- C27H56NO7P	M+HCOO 1-	582.377	47		57.2	42.1	74.3		22.6		71.9		2.42		2.41	2.42	2.41		2.43		2.41		0.92		0.87	0.87	0.88		0.89		0.58
74		Cer-NS d34:1; Cer-NS d18:1/16:0; [M-H]- C34H67NO3	M+HCOO 1-	582.509	366.5	239.5	433.7	520	448.6	272.3	198.8	174.7	499.2	318.7	4.21	4.2	4.19	4.19	4.2	4.19	4.2	4.2	4.19	4.19	0.93	0.86	0.87	0.89	0.93	0.87	0.89	0.92	0.94	0.9
75	*	FAHFA 38:5; FAHFA 20:4/18:1; [M-H]- C38H64O4	M-H 1-	583.471	48.9			49.7							2.23			2.23							0.79			0.82
75	*	ISF of FAHFA 38:5; FAHFA 20:4/18:1; [M-H]- C38H64O4	-	279.233	31637.6										2.25										0.96
76	*	FAHFA 38:4; FAHFA 18:1/20:3; [M-H]- C38H66O4	M-H 1-	585.485	198.5		246.3		369.7						2.55		2.56		2.54						0.92		0.92		0.91
76	*	ISF of FAHFA 38:4; FAHFA 18:1/20:3; [M-H]- C38H66O4	-	281.251			30194.7		49054.1								2.56		2.56								1		0.99
77		LPC 20:5; [M+FA-H]- C28H48NO7P	M+HCOO 1-	586.314	58.9	235.6	46.8		201.7						1.14	1.15	1.15		1.15						0.76	0.8	0.74		0.75
78		LPC 20:4; [M+FA-H]- C28H50NO7P	M+HCOO 1-	588.33	2166.8	6988.1	2674.5	1333.6	7146.5	173.6	124.9		338.8	119.9	1.46	1.44	1.46	1.45	1.46	1.46	1.46		1.47	1.45	0.83	0.86	0.84	0.84	0.85	0.84	0.86		0.83	0.8
79		LPC 20:3; [M+FA-H]- C28H52NO7P	M+HCOO 1-	590.346	405.5	2061.8	516.5	418	1486.9		23.7		71.8	35.9	1.64	1.65	1.65	1.66	1.65		1.65		1.66	1.66	0.87	0.88	0.88	0.88	0.89		0.84		0.86	0.77
80		9(10)-EpOME [M+H]+ C18H32O3 NIST 1138256	2M-H 1-	591.461					60.4										2.8										0.5
81		LPC 20:2; [M+FA-H]- C28H54NO7P	M+HCOO 1-	592.361	39.5	118.5									1.92	1.92									0.82	0.85
82		FAHFA 38:0; FAHFA 18:0/20:0; [M-H]- C38H74O4	M-H 1-	593.55	25.9	25.4	32	29.5	50.2						2.91	2.9	2.91	2.91	2.91						0.69	0.7	0.71	0.7	0.68
83		PS 22:0; PS 4:0-18:0; [M-H]- C28H54NO10P	M-H 1-	594.34				38.3										2.02										0.62
84		LPC 20:1; [M+FA-H]- C28H56NO7P	M+HCOO 1-	594.377		57		45.1	69.5	18.2			43.5	26.3		2.26		2.27	2.26	2.3			2.29	2.27		0.78		0.95	0.91	0.92			0.92	0.95
85		LPC 20:0; [M+FA-H]- C28H58NO7P	M+HCOO 1-	596.392	53.7	61.4		46.4		20.5	18.1		59.9	47.9	2.59	2.6		2.59		2.6	2.63		2.6	2.59	0.94	0.97		0.95		0.94	0.91		0.95	0.99
86		Cer-ADS d34:1; Cer-ADS d14:0/20:1; [M-H]- C34H67NO4---Cer-AS d34:1; Cer-AS d18:1/16:0; [M-H]- C34H67NO4---Cer-NP t34:1; Cer-NP t18:1/16:0; [M-H]- C34H67NO4	M+HCOO 1-	598.504	18.8			15.7	14.1		19.8	17.5		15.7	4.02			4.03	4.04		4	4.03		4.04	0.76			0.83	0.71		0.62	0.73		0.58
87		LPI 18:0; [M-H]- C27H53O12P	M-H 1-	599.322			39.3	37.2									1.9	1.89									0.94	0.67
88		PS 24:0; PS 6:0-18:0; [M-H]- C30H58NO10P	M-H2O-H 1-	604.361										39.8										2.4										0.57
89		8,11-Eicosadiynoic acid [M-H]- C20H32O2 NIST 1204920---8,11-Eicosadiynoic acid [M-H]- C20H32O2 NIST 1204921	2M-H 1-	607.473	168.1	27.8	108	203.6	245.6						2.19	2.2	2.2	2.21	2.2						0.93	0.91	0.93	0.93	0.93
90		Cer-NS d36:2; Cer-NS d18:2/18:0; [M-H]- C36H69NO3	M+HCOO 1-	608.524								68										4.28										0.67
91		FAHFA 40:6; FAHFA 18:2/22:4; [M-H]- C40H66O4---FAHFA 40:6; FAHFA 22:5/18:1; [M-H]- C40H66O4	M-H 1-	609.491	15.9				57.3						2.29				2.2						0.79				0.76
92		Cer-NS d36:1; Cer-NS d18:1/18:0; [M-H]- C36H71NO3---N-(octadecanoyl)-sphing-4-enine; [M-H]-; Cer(d18:1(4E)/18:0) C36H71NO3	M+HCOO 1-	610.541	66.6			95.4	54.6			718.8	44.7		4.55			4.56	4.57			4.56	4.55		0.73			0.72	0.69			0.97	0.59
93		LPC 22:6; [M+FA-H]- C30H50NO7P	M+HCOO 1-	612.33	976.6	3633.1	925.3	408.2	2687.6	60.9	44.8	46.2	109.2		1.41	1.42	1.42	1.43	1.42	1.42	1.42	1.41	1.42		0.7	0.72	0.7	0.67	0.7	0.62	0.53	0.66	0.74
94		LPC 22:5; [M+FA-H]- C30H52NO7P	M+HCOO 1-	614.342		759.5	203		601.9							1.53	1.54		1.52							0.85	0.83		0.87
95		LPC 22:4; [M+FA-H]- C30H54NO7P	M+HCOO 1-	616.361	27.3	98.6									1.83	1.84									0.88	0.87
96		Cer-NS d40:1; Cer-NS d18:1/22:0; [M-H]- C40H79NO3	M-H 1-	620.597	33.4	29	29.3	50.4	71.3				18.5	29	5.2	5.21	5.21	5.21	5.2				5.2	5.2	0.82	0.76	0.65	0.84	0.8				0.79	0.71
97		Ginsenoside compound K C36H62O8	M-H 1-	621.437							42.7										3.18										0.61
98		13-Hydroperoxy-9Z,11E-octadecadienoic acid [M-H-H2O]- C18H32O4 NIST 1134460	2M-H 1-	623.452					52.2										1.08										0.57
99		Cer-NS d37:1; Cer-NS d18:1/19:0; [M-H]- C37H73NO3	M+HCOO 1-	624.556								71.4										4.71										0.7
100		FAHFA 18:0; FAHFA 16:0/2:0; [M-H]- C18H34O4	2M-H 1-	627.484			19.6		14.3								1.69		1.71								0.95		0.95
101		Cer-NS d38:2; Cer-NS d18:2/20:0; [M-H]- C38H73NO3	M+HCOO 1-	636.556	42.3			67.3	49.1						4.64			4.62	4.63						0.71			0.78	0.73
102		Cer-NS d38:1; Cer-NS d18:1/20:0; [M-H]- C38H75NO3	M+HCOO 1-	638.572	197.5	93.2	179.8	437.6	342.8	48.8	38.7	66.5	116.7	132.2	4.9	4.89	4.88	4.88	4.9	4.9	4.9	4.88	4.9	4.88	0.9	0.76	0.94	0.87	0.91	0.71	0.65	0.69	0.77	0.93
103		Cer-NS d39:2; Cer-NS d17:1/22:1; [M-H]- C39H75NO3	M+HCOO 1-	650.571	18.2		15.7	28.9					25.2	17	4.75		4.76	4.75					4.74	4.76	0.64		0.66	0.6					0.54	0.51
104		Cer-NS d39:1; Cer-NS d17:1/22:0; [M-H]- C39H77NO3---Cer-NS d39:1; Cer-NS d18:1/21:0; [M-H]- C39H77NO3	M+HCOO 1-	652.588	102.2	81.5	95.3	145.2	197.6				83.8	71.7	5.05	5.06	5.06	5.06	5.05				5.05	5.05	0.74	0.74	0.7	0.8	0.73				0.77	0.78
105		Docosahexanoic acid C22H32O2	2M-H 1-	655.474	265.1	24.3	85.4	134.9	347.6						2.11	2.09	2.09	2.1	2.09						0.83	0.81	0.75	0.76	0.87
106		Cer-NS d40:3; Cer-NS d18:1/22:2; [M-H]- C40H75NO3---Cer-NS d40:3; Cer-NS d18:2/22:1; [M-H]- C40H75NO3	M+HCOO 1-	662.572		35.3	46.9	95.8	84.4	26.5			66.3	51.8		4.65	4.64	4.64	4.65	4.66			4.66	4.64		0.69	0.65	0.83	0.71	0.58			0.61	0.71
107		Cer-NS d40:2; Cer-NS d18:1/22:1; [M-H]- C40H77NO3---Cer-NS d40:2; Cer-NS d18:2/22:0; [M-H]- C40H77NO3	M+HCOO 1-	664.588	549.8	422.8	529.4	1176.8	1045.3	176.2	170.8	76	484.8	529.6	4.94	4.93	4.93	4.93	4.94	4.92	4.92	4.95	4.92	4.93	0.87	0.9	0.91	0.97	0.93	0.86	0.78	0.79	0.92	0.97
108		Cer-NS d40:1; Cer-NS d18:1/22:0; [M-H]- C40H79NO3	M+HCOO 1-	666.604	1665.6	1402.5	1455.1	2448.2	3467.4	439.8	348.2	271.6	1064.1	1387.8	5.2	5.21	5.21	5.21	5.2	5.19	5.21	5.21	5.2	5.2	0.93	0.92	0.97	0.93	0.97	0.93	0.93	0.94	0.88	0.98
109		Cer-NDS d40:0; Cer-NDS d18:0/22:0; [M-H]- C40H81NO3	M+HCOO 1-	668.618	60.3				103.3						5.3				5.31						0.74				0.74
110		PEtOH 32:1; PEtOH 16:0-16:1; [M-H]- C37H71O8P	M-H 1-	673.48		29.3										3.61										0.96
111		plasmenyl-PE 32:0; [M-H]-; PE(P-16:0/16:0) C37H74NO7P	M-H 1-	674.511								53										4.3										0.93
112		Cer-NS d41:3; Cer-NS d17:1/24:2; [M-H]- C41H77NO3	M+HCOO 1-	676.588									26.7										4.81										0.68
113		Cer-NS d41:2; Cer-NS d17:1/24:1; [M-H]- C41H79NO3	M+HCOO 1-	678.604	190.4	155	202.9	221.1	283.4	120.2	93.7		306.7	156.4	5.07	5.08	5.08	5.08	5.07	5.07	5.07		5.07	5.08	0.67	0.72	0.87	0.91	0.8	0.68	0.75		0.86	0.77
114		Cer-NS d41:1; Cer-NS d18:1/23:0; [M-H]- C41H81NO3	M+HCOO 1-	680.619	526	404.6	463.5	528.1	875.6	310.5	217.8	249.2	735.2	439.8	5.35	5.34	5.34	5.34	5.35	5.35	5.35	5.34	5.35	5.33	0.92	0.81	0.85	0.87	0.85	0.91	0.93	0.81	0.86	0.86
115		Cer-NP t40:0; Cer-NP t18:0/22:0; [M-H]- C40H81NO4	M+HCOO 1-	684.613	39.4		32.9		67	22.9	21.4		38.1	35.6	5.05		5.03		5.05	5.05	5.05		5.05	5.05	0.88		0.85		0.96	0.68	0.69		0.82	0.72
116		PMeOH 34:2; PMeOH 16:0-18:2; [M-H]- C38H71O8P	M-H 1-	685.479			100.3										3.6										0.95
117		1,2-Dipalmitoleoyl-sn-glycero-3-phosphoethanolamine [M-H]- C37H70NO8P NIST 1150482---PE 32:2; PE 16:1-16:1; [M-H]- C37H70NO8P---PE 32:2; [M-H]-; GPEtn(16:1(7Z)/16:1(7Z)) C37H70NO8P---PE 32:2; [M-H]-; GPEtn(16:1(7Z)/16:1(9Z)) C37H70NO8P---PE 32:2; [M-H]-; GPEtn(16:1(9Z)/16:1(7Z)) C37H70NO8P---PE 32:2; [M-H]-; GPEtn(16:1(9Z)/16:1(9Z)) C37H70NO8P	M-H 1-	686.477		39.8	114.6			37.9			77.5			3.56	3.55			3.58			3.58			0.78	0.79			0.8			0.69
118		PE 32:1; PE 16:0-16:1; [M-H]- C37H72NO8P---PE 32:1; [M-H]-; GPEtn(16:0/16:1(7Z)) C37H72NO8P---PE 32:1; [M-H]-; GPEtn(16:0/16:1(9Z)) C37H72NO8P---PE 32:1; [M-H]-; GPEtn(16:1(7Z)/16:0) C37H72NO8P---PE 32:1; [M-H]-; GPEtn(16:1(9Z)/16:0) C37H72NO8P	M-H 1-	688.492	115.1	170.7	109.5	160.2	143	122.9	142.1	52	185.7	119.8	3.83	3.84	3.83	3.83	3.84	3.83	3.84	3.83	3.84	3.83	0.92	0.92	0.94	0.94	0.94	0.87	0.93	0.88	0.94	0.92
119		Cer-NS d42:4; Cer-NS d18:2/24:2; [M-H]- C42H77NO3	M+HCOO 1-	688.587	39.6			30.1	49.5						4.72			4.73	4.72						0.59			0.67	0.57
120		PE 32:0; PE 16:0-16:0; [M-H]- C37H74NO8P---PE 32:0; [M-H]-; GPEtn(16:0/16:0) C37H74NO8P	M-H 1-	690.507		31.7			37		31.4					4.12			4.12		4.11					0.95			0.95		0.93
121		Cer-NS d42:3; Cer-NS d18:2/24:1; [M-H]- C42H79NO3	M+HCOO 1-	690.604	462.3	341.3	442	533.7	608.4	276.5	232.7	137	743.5	377.2	4.96	4.97	4.97	4.97	4.96	4.96	4.96	4.97	4.96	4.97	0.78	0.77	0.83	0.83	0.83	0.81	0.82	0.78	0.82	0.87
122		Cer-NDS d42:2; Cer-NDS d18:0/24:2; [M-H]- C42H81NO3---Cer-NS d42:2; Cer-NS d18:1/24:1; [M-H]- C42H81NO3	M+HCOO 1-	692.62	2079.9	1866.2	2451.3	2638.3	3283.2	1358.6	1066.9	596.2	3386.9	1981	5.2	5.21	5.21	5.21	5.2	5.19	5.21	5.21	5.2	5.2	0.91	0.92	0.96	0.91	0.91	0.92	0.92	0.88	0.91	0.92
123		PMeOH 36:3; PMeOH 18:1-18:2; [M-H]- C40H73O8P	M-H2O-H 1-	693.494					572.6										3.34										0.62
124		Cer-NDS d42:1; Cer-NDS d18:0/24:1; [M-H]- C42H83NO3---Cer-NS d42:1; Cer-NS d18:1/24:0; [M-H]- C42H83NO3	M+HCOO 1-	694.636	1256.5	1442.1	1183.7	1477.7	2460.5	980.6	556.5	355.4	3323	1094.4	5.48	5.49	5.47	5.49	5.49	5.49	5.48	5.49	5.49	5.48	0.91	0.92	0.91	0.92	0.93	0.91	0.91	0.96	0.93	0.91
125		Cer-NDS d42:0; Cer-NDS d14:0/28:0; [M-H]- C42H85NO3---Cer-NDS d42:0; Cer-NDS d18:0/24:0; [M-H]- C42H85NO3	M+HCOO 1-	696.644	198.6		201.9			156.8					5.5		5.5			5.6					0.66		0.53			0.57
126		PEtOH 34:3; PEtOH 16:1-18:2; [M-H]- C39H71O8P	M-H 1-	697.481		145.2										3.46										0.97
127		plasmenyl-PE 34:2; [M-H]-; PE(P-16:0/18:2(2E,4E)) C39H74NO7P---plasmenyl-PE 34:2; [M-H]-; PE(P-16:0/18:2(6Z,9Z)) C39H74NO7P---plasmenyl-PE 34:2; [M-H]-; PE(P-16:0/18:2(9E,10E)) C39H74NO7P---plasmenyl-PE 34:2; [M-H]-; PE(P-16:0/18:2(9E,12E)) C39H74NO7P---plasmenyl-PE 34:2; [M-H]-; PE(P-16:0/18:2(9Z,11Z)) C39H74NO7P---plasmenyl-PE 34:2; [M-H]-; PE(P-16:0/18:2(9Z,12Z)) C39H74NO7P	M-H 1-	698.513	103.7	55.3	83.7	66.1	94.5	116.7	73.4	237.8	192.5	67	4.1	4.12	4.11	4.11	4.12	4.11	4.11	4.11	4.11	4.11	0.92	0.95	0.91	0.93	0.92	0.96	0.9	0.83	0.95	0.94
128		Cer-NP t41:0; Cer-NP t18:0/23:0; [M-H]- C41H83NO4	M+HCOO 1-	698.629	31.7	25.7				29		15.8	52.8	25.3	5.2	5.19				5.22		5.19	5.2	5.18	0.66	0.73				0.6		0.57	0.67	0.78
129		PEtOH 34:2; PEtOH 16:0-18:2; [M-H]- C39H73O8P	M-H 1-	699.496	49.9	809.5		75							3.7	3.69		3.69							0.98	0.97		0.93
130		PE 33:2; PE 15:0-18:2; [M-H]- C38H72NO8P	M-H 1-	700.492						30.7			47.1							3.78			3.75							0.88			0.71
131		PE 34:2e; PE 16:1e/18:1; [M-H]- C39H76NO7P---plasmenyl-PE 34:1; [M-H]-; PE(P-16:0/18:1(11E)) C39H76NO7P---plasmenyl-PE 34:1; [M-H]-; PE(P-16:0/18:1(11Z)) C39H76NO7P---plasmenyl-PE 34:1; [M-H]-; PE(P-16:0/18:1(13Z)) C39H76NO7P---plasmenyl-PE 34:1; [M-H]-; PE(P-16:0/18:1(17Z)) C39H76NO7P---plasmenyl-PE 34:1; [M-H]-; PE(P-16:0/18:1(4E)) C39H76NO7P---plasmenyl-PE 34:1; [M-H]-; PE(P-16:0/18:1(6Z)) C39…	M-H 1-	700.528	240.5	64.4	118.3	122.6	103.6	78.5	68.2	531	178.8	90.7	4.36	4.35	4.36	4.36	4.35	4.36	4.34	4.37	4.36	4.36	0.92	0.8	0.86	0.84	0.77	0.82	0.87	0.72	0.82	0.83
132		PEtOH 34:1; PEtOH 16:0-18:1; [M-H]- C39H75O8P	M-H 1-	701.51	11	87.6									3.94	3.92									0.96	0.96
133		PE 33:1; PE 16:0-17:1; [M-H]- C38H74NO8P	M-H 1-	702.508					31.8				37.9						3.99				4						0.76				0.67
134		1-Hexadecyl-2-(9Z-octadecenoyl)-sn-glycero-3-phosphoethanolamine [M-H]- C39H78NO7P NIST 1148471---PE 34:1e; PE 16:0e/18:1; [M-H]- C39H78NO7P---PE 34:1e; PE 18:1e/16:0; [M-H]- C39H78NO7P---plasmenyl-PE 34:0; [M-H]-; PE(P-18:0/16:0) C39H78NO7P	M-H 1-	702.541	62.4		45.5					106	67	42.1	4.38		4.38					4.65	4.38	4.39	0.74		0.68					0.93	0.73	0.69
135		Cer-NS d43:2; Cer-NS d14:1/29:1; [M-H]- C43H83NO3---Cer-NS d43:2; Cer-NS d18:1/25:1; [M-H]- C43H83NO3---Cer-NS d43:2; Cer-NS d20:2/23:0; [M-H]- C43H83NO3	M+HCOO 1-	706.635			23.5	23.9					55.9				5.34	5.34					5.35				0.57	0.63					0.68
136		Cer-NS d43:1; Cer-NS d18:1/25:0; [M-H]- C43H85NO3	M+HCOO 1-	708.651	67.4	72.9	51.3	58.6	92.8	54.4	38.2	33.2	113.8	59	5.6	5.59	5.61	5.62	5.6	5.61	5.62	5.62	5.6	5.59	0.64	0.81	0.82	0.7	0.91	0.71	0.7	0.72	0.91	0.52
137		PA 37:4; PA 18:2-19:2; [M-H]- C40H71O8P	M-H 1-	709.482				157.8										3.02										0.53
138		Cer-NP t42:1; Cer-NP t18:0/24:1; [M-H]- C42H83NO4	M+HCOO 1-	710.628	62.2	53	58.5		78.8	50.7	41.9		86.5	47.3	5.05	5.06	5.06		5.07	5.05	5.05		5.05	5.05	0.8	0.86	0.85		0.68	0.68	0.8		0.85	0.63
139		PE 34:3; PE 16:0-18:3; [M-H]- C39H72NO8P---PE 34:3; PE 16:1-18:2; [M-H]- C39H72NO8P	M-H 1-	712.493	648.9	678.7	687.5		1124.3	654.6	594.2	129.2	1501.8	551.8	3.66	3.67	3.66		3.67	3.66	3.67	3.64	3.67	3.67	0.9	0.93	0.92		0.91	0.94	0.8	0.87	0.94	0.94
139		PE(16:0/9-HODE) C39H74NO9P	M-H2O-H 1-	712.494				654.8										3.64										0.58
140		Cer-NP t42:0; Cer-NP t18:0/24:0; [M-H]- C42H85NO4	M+HCOO 1-	712.644	76.4		60.3	59.9	72.6		51.5		90.8	57	5.35		5.34	5.34	5.35		5.35		5.35	5.36	0.9		0.88	0.85	0.9		0.74		0.92	0.87
141		PE 34:1; PE 16:0-18:1; [M-H]- C39H76NO8P	M-H 1-	716.523	1194.1	1419.6	902.1	1467.2	1393.1	1641.3	1696	508.9	2815.7	1081.2	4.17	4.16	4.17	4.17	4.16	4.17	4.17	4.17	4.17	4.17	0.92	0.91	0.91	0.9	0.93	0.92	0.93	0.94	0.93	0.92
142		PC 31:0; PC 15:0-16:0; [M+FA-H]- C39H78NO8P---PE 34:0; [M-H]-; GPEtn(16:0/18:0) C39H78NO8P---PE 34:0; [M-H]-; GPEtn(18:0/16:0) C39H78NO8P	M-H 1-	718.538	45			49.9	42.2			62	55.4		4			4	3.99			4	4		0.64			0.51	0.52			0.69	0.69
143		PE 34:0; PE 16:0-18:0; [M-H]- C39H78NO8P	M-H 1-	718.539		31.7	39.3	38.1	52.8	23.2	18.5	83.1	42.8	36.7		4.46	4.45	4.45	4.46	4.45	4.45	4.45	4.45	4.45		0.86	0.91	0.93	0.92	0.93	0.9	0.9	0.94	0.87
144		SM d32:1; SM d14:0/18:1; [M+FA-H]- C37H75N2O6P	M+HCOO 1-	719.534	14.1	13.1	28.9			19.8	13.1	15.6	42.3	17.5	3.3	3.32	3.29			3.28	3.32	3.31	3.3	3.3	0.93	0.87	0.95			0.97	0.94	0.86	0.99	0.97
145		PE 36:6e; PE 16:1e/20:5; [M-H]- C41H72NO7P	M-H 1-	720.496									29.4										3.86										0.88
146		Cer-AS d43:3; Cer-AS d19:3/24:0; [M-H]- C43H81NO4	M+HCOO 1-	720.614			51.1										5.21										0.65
147		PEtOH 36:5; PEtOH 16:1-20:4; [M-H]- C41H71O8P	M-H 1-	721.481		78.3										3.39										0.74
148		1,2-Dipalmitoyl-sn-glycero-3-phospho-(1'-rac-glycerol) [M-H]- C38H75O10P NIST 1149513---PG 32:0; PG 16:0-16:0; [M-H]- C38H75O10P	M-H 1-	721.499								37.6	26.5									3.64	3.67									0.93	0.61
149		plasmenyl-PE 36:4; [M-H]-; PE(P-16:0/20:4(5E,8E,11E,14E)) C41H74NO7P---plasmenyl-PE 36:4; [M-H]-; PE(P-16:0/20:4(5Z,8Z,11Z,14Z)) C41H74NO7P---plasmenyl-PE 36:4; [M-H]-; PE(P-16:0/20:4(7E,10E,13E,16E)) C41H74NO7P	M-H 1-	722.513	2433.2	967.7	1231.6	1361.3	1294.7	1282.9	901.9	578.8	2554.7	1116	4.08	4.07	4.09	4.07	4.07	4.07	4.07	4.07	4.07	4.07	0.94	0.94	0.94	0.94	0.94	0.94	0.93	0.94	0.93	0.94
150		Cer-NS d44:1; Cer-NS d18:1/26:0; [M-H]- C44H87NO3---Cer-NS d44:1; Cer-NS d20:1/24:0; [M-H]- C44H87NO3---N-(hexacosanoyl)-sphing-4-enine; [M-H]-; Cer(d18:1(4E)/26:0) C44H87NO3	M+HCOO 1-	722.666	29.9		22.1		20.7		20.6		26		5.74		5.77		5.75		5.74		5.77		0.6		0.56		0.57		0.57		0.56
151		1',3'-Bis-[1,2-di-(9Z,12Z-octadecadienoyl)-sn-glycero-3-phospho]-sn-glycerol [M-2H]2- C81H142O17P2 NIST 1035186	M-2H 2-	723.482	24	29.7	22.5		42.2	9.9		32.7	96.4	14.6	5.67	5.71	5.69		5.7	5.68		5.7	5.7	5.72	0.85	0.77	0.77		0.84	0.77		0.78	0.93	0.81
152		PEtOH 36:4; PEtOH 16:0-20:4; [M-H]- C41H73O8P---PEtOH 36:4; PEtOH 18:2-18:2; [M-H]- C41H73O8P	M-H 1-	723.497	57.3	422.5		87.6	95.3					27.9	3.66	3.67		3.66	3.67					3.67	0.82	0.94		0.84	0.89					0.83
153		CL 72:7; [M-2H](2-); CL(18:2/18:1/18:2/18:2) C81H144O17P2	M-2H 2-	724.488				36.1				25.6	93					5.82				5.83	5.79					0.68				0.62	0.72
154		PE 36:4e; PE 16:0e/20:4; [M-H]- C41H76NO7P---PE 36:4e; PE 18:2e/18:2; [M-H]- C41H76NO7P---plasmenyl-PE 36:3; [M-H]-; PE(P-16:0/20:3(5Z,8Z,11Z)) C41H76NO7P---plasmenyl-PE 36:3; [M-H]-; PE(P-16:0/20:3(8Z,11Z,14Z)) C41H76NO7P	M-H 1-	724.523	469.4	195.7	202.7			157.4	211	324.9	520.4	229.3	4.1	4.09	4.11			4.11	4.11	4.15	4.09	4.09	0.63	0.72	0.73			0.81	0.68	0.75	0.7	0.58
155		PEtOH 36:3; PEtOH 18:1-18:2; [M-H]- C41H75O8P	M-H 1-	725.51		390.6		49	56.1							3.74		3.73	3.73							0.88		0.96	0.86
156		PE 35:3; PE 17:1-18:2; [M-H]- C40H74NO8P	M-H 1-	726.508	62.4			32.1			45.3		93.4		3.81			3.82			3.81		3.81		0.89			0.9			0.88		0.86
157		PE 36:3e; PE 18:2e/18:1; [M-H]- C41H78NO7P---plasmenyl-PE 36:2; [M-H]-; PE(P-18:0/18:2(2E,4E)) C41H78NO7P---plasmenyl-PE 36:2; [M-H]-; PE(P-18:0/18:2(6Z,9Z)) C41H78NO7P---plasmenyl-PE 36:2; [M-H]-; PE(P-18:0/18:2(9E,10E)) C41H78NO7P---plasmenyl-PE 36:2; [M-H]-; PE(P-18:0/18:2(9E,12E)) C41H78NO7P---plasmenyl-PE 36:2; [M-H]-; PE(P-18:0/18:2(9Z,11Z)) C41H78NO7P---plasmenyl-PE 36:2; [M-H]-; PE(P-18:0…	M-H 1-	726.543	201.2	111.2	158.7	113.5	197.3	132.6	114.8	713.4	275.2	122.2	4.44	4.46	4.45	4.43	4.44	4.45	4.45	4.43	4.45	4.45	0.93	0.96	0.94	0.9	0.94	0.94	0.92	0.94	0.94	0.96
158		Cer-AP t42:1; Cer-AP t18:0/24:1; [M-H]- C42H83NO5---Cer-AP t42:1; Cer-AP t18:1/24:0; [M-H]- C42H83NO5---Cer-EODS d42:0; Cer-EODS d14:0/12:0-O-16:0; [M-H]- C42H83NO5	M+HCOO 1-	726.624		26.8		64.4		43.8	34.8	30.5	49.2	39		4.87		4.88		4.87	4.88	4.88	4.88	4.88		0.63		0.72		0.75	0.67	0.59	0.84	0.66
159		Cer-ADS d43:0; Cer-ADS d28:0/15:0; [M-H]- C43H87NO4---Cer-NP t43:0; Cer-NP t17:0/26:0; [M-H]- C43H87NO4	M+HCOO 1-	726.652						47.5	30.5									5.59	5.62									0.56	0.58
160		PEtOH 36:2; PEtOH 18:0-18:2; [M-H]- C41H77O8P	M-H 1-	727.529		229.8		34.4								4.03		4.02								0.97		0.86
161		OxPE 34:2+2O; OxPE 16:0-18:2+2O ; [M-H]- C39H74NO10P	M-H2O-H 1-	728.492				253.1										3.19										0.85
162		PE 35:2; PE 17:0-18:2; [M-H]- C40H76NO8P---PE 35:2; [M-H]-; GPEtn(17:0/18:2(2E,4E)) C40H76NO8P---PE 35:2; [M-H]-; GPEtn(17:0/18:2(6Z,9Z)) C40H76NO8P---PE 35:2; [M-H]-; GPEtn(17:0/18:2(9E,10E)) C40H76NO8P---PE 35:2; [M-H]-; GPEtn(17:0/18:2(9E,12E)) C40H76NO8P---PE 35:2; [M-H]-; GPEtn(17:0/18:2(9Z,11Z)) C40H76NO8P---PE 35:2; [M-H]-; GPEtn(17:0/18:2(9Z,12Z)) C40H76NO8P---PE 35:2; [M-H]-; GPEtn(18:2(…	M-H 1-	728.524	211.1	302.4	120.5	103.1	302.9	161.2	119.7	69.1	278.5	134.1	4.08	4.07	4.09	4.07	4.09	4.09	4.09	4.09	4.09	4.09	0.89	0.85	0.77	0.77	0.89	0.81	0.8	0.89	0.78	0.84
163		PE 36:2e; PE 18:0e/18:2; [M-H]- C41H80NO7P---plasmenyl-PE 36:1; [M-H]-; PE(P-18:0/18:1(11E)) C41H80NO7P---plasmenyl-PE 36:1; [M-H]-; PE(P-18:0/18:1(11Z)) C41H80NO7P---plasmenyl-PE 36:1; [M-H]-; PE(P-18:0/18:1(13Z)) C41H80NO7P---plasmenyl-PE 36:1; [M-H]-; PE(P-18:0/18:1(17Z)) C41H80NO7P---plasmenyl-PE 36:1; [M-H]-; PE(P-18:0/18:1(4E)) C41H80NO7P---plasmenyl-PE 36:1; [M-H]-; PE(P-18:0/18:1(6Z)) C41…	M-H 1-	728.558	147.5	106.7	179.8		209.9	105.1	84.4	465.3	228.7	112.8	4.68	4.52	4.54		4.54	4.51	4.52	4.69	4.53	4.51	0.93	0.95	0.92		0.92	0.89	0.97	0.96	0.87	0.97
164		Cer-AP t42:0; Cer-AP t18:0/24:0; [M-H]- C42H85NO5	M+HCOO 1-	728.635						59	81.6									5.22	5.21									0.86	0.82
165		PE(16:0/9-HODE) C39H74NO9P	M-H 1-	730.502	29.5	42.8			206			27.5		32.8	3.05	3.05			3.04			2.93		3.04	0.89	0.69			0.83			0.96		0.91
166		PE 35:1; PE 16:0-19:1; [M-H]- C40H78NO8P---PE 35:1; PE 17:0-18:1; [M-H]- C40H78NO8P---PE 35:1; [M-H]-; GPEtn(17:0/18:1(11E)) C40H78NO8P---PE 35:1; [M-H]-; GPEtn(17:0/18:1(11Z)) C40H78NO8P---PE 35:1; [M-H]-; GPEtn(17:0/18:1(13Z)) C40H78NO8P---PE 35:1; [M-H]-; GPEtn(17:0/18:1(17Z)) C40H78NO8P---PE 35:1; [M-H]-; GPEtn(17:0/18:1(4E)) C40H78NO8P---PE 35:1; [M-H]-; GPEtn(17:0/18:1(6Z)) C40H78NO8P---PE …	M-H 1-	730.539	58.3	63.5	41.3		70.3	60.6	55		129		4.33	4.33	4.34		4.33	4.32	4.32		4.32		0.63	0.6	0.66		0.69	0.65	0.58		0.62
167		PE 36:1e; PE 18:0e/18:1; [M-H]- C41H82NO7P	M-H 1-	730.573			41.7							30.5			4.71							4.71			0.82							0.85
168		SM d33:1; SM d14:0/19:1; [M+FA-H]- C38H77N2O6P---SM d33:1; SM d17:1/16:0; [M+FA-H]- C38H77N2O6P	M+HCOO 1-	733.549	108.1	58.6	152.8	102.3	144.8	82.9	59	58.8	191	76.6	3.47	3.46	3.47	3.47	3.47	3.45	3.45	3.47	3.45	3.47	0.98	0.96	0.97	0.99	0.98	0.99	0.96	0.97	0.98	0.98
169		CL 74:11; [M-2H](2-); CL(18:2/18:3/18:2/20:4) C83H140O17P2	M-2H 2-	734.478									109										3.47										0.53
169		PE 36:6; PE 14:0-22:6; [M-H]- C41H70NO8P	M-H 1-	734.479	53.1										3.49										0.53
169		PE(16:1/8-HETE) C41H72NO9P	M-H2O-H 1-	734.482					139.9										3.43										0.6
170		PE 36:5; PE 16:1-20:4; [M-H]- C41H72NO8P---PE 36:5; PE 18:2-18:3; [M-H]- C41H72NO8P	M-H 1-	736.492	1075.1	959.1	1013	893.8	1455.6	1017	839.1	107.2	2282.5	935.1	3.64	3.65	3.64	3.64	3.65	3.62	3.62	3.6	3.62	3.62	0.92	0.9	0.93	0.91	0.92	0.93	0.94	0.93	0.92	0.94
171		PE(16:1e/18-HETE) C41H74NO8P	M-H 1-	738.505					172.8										3.23										0.68
172		PE 36:4; PE 16:0-20:4; [M-H]- C41H74NO8P---PE 36:4; PE 18:2-18:2; [M-H]- C41H74NO8P---PE 36:4; [M-H]-; GPEtn(18:2(2E,4E)/18:2(2E,4E)) C41H74NO8P---PE 36:4; [M-H]-; GPEtn(18:2(2E,4E)/18:2(6Z,9Z)) C41H74NO8P---PE 36:4; [M-H]-; GPEtn(18:2(2E,4E)/18:2(9E,10E)) C41H74NO8P---PE 36:4; [M-H]-; GPEtn(18:2(2E,4E)/18:2(9E,12E)) C41H74NO8P---PE 36:4; [M-H]-; GPEtn(18:2(2E,4E)/18:2(9Z,11Z)) C41H74NO8P---PE 36…	M-H 1-	738.509	9389.2	8652.2	9347.8	10813.8	11212.5	2363.0,7447.4	2005.5,6815.7	1054.9	11826	9200	3.89	3.9	3.9	3.9	3.9	3.58,3.90	3.58,3.90	3.9	3.9	3.9	0.92	0.92	0.93	0.93	0.93	0.88,0.93	0.93,0.93	0.92	0.93	0.92
173		Cer-ADS d44:1; Cer-ADS d26:0/18:1; [M-H]- C44H87NO4---Cer-ADS d44:1; Cer-ADS d28:0/16:1; [M-H]- C44H87NO4	M+HCOO 1-	738.661							69.5		82.3								5.48		5.33								0.5		0.57
174		CL 74:5; [M-2H](2-); CL(18:2/22:0/18:2/16:1) C83H152O17P2	M-2H 2-	740.516			1061.6	89.4					3357.6				3.66	3.64					3.52				0.56	0.56					0.56
174		PE 36:3; [M-H]-; GPEtn(18:1(11E)/18:2(2E,4E)) C41H76NO8P---PE 36:3; [M-H]-; GPEtn(18:1(11E)/18:2(6Z,9Z)) C41H76NO8P---PE 36:3; [M-H]-; GPEtn(18:1(11E)/18:2(9E,10E)) C41H76NO8P---PE 36:3; [M-H]-; GPEtn(18:1(11E)/18:2(9E,12E)) C41H76NO8P---PE 36:3; [M-H]-; GPEtn(18:1(11E)/18:2(9Z,11Z)) C41H76NO8P---PE 36:3; [M-H]-; GPEtn(18:1(11E)/18:2(9Z,12Z)) C41H76NO8P---PE 36:3; [M-H]-; GPEtn(18:1(11Z)/18:2(2E,…	M-H 1-	740.519	1382.1				1223						3.53				3.52						0.59				0.6
175		PE(18:2e/13-HODE) C41H76NO8P	M-H 1-	740.521								565.8										3.71										0.73
176		PE 36:3; PE 18:1-18:2; [M-H]- C41H76NO8P	M-H 1-	740.522	5909.6	3880.1	4784.1	4382.6	6411.9	5637.3	4329.4	1437.1	9616.4	4850.7	3.97	3.97	3.98	3.96	3.97	3.98	3.98	3.98	3.98	3.96	0.95	0.91	0.95	0.93	0.91	0.94	0.94	0.95	0.94	0.93
177		Cer-AP t43:1; Cer-AP t17:1/26:0; [M-H]- C43H85NO5---Cer-AP t43:1; Cer-AP t18:1/25:0; [M-H]- C43H85NO5	M+HCOO 1-	740.64			19.6	25.2		23.1	24.7			21.3			5.05	5.05		5.02	5.04			5.03			0.67	0.67		0.67	0.72			0.72
178		Cer-ADS d44:0; Cer-ADS d27:0/17:0; [M-H]- C44H89NO4---Cer-ADS d44:0; Cer-ADS d29:0/15:0; [M-H]- C44H89NO4---Cer-NP t44:0; Cer-NP t18:0/26:0; [M-H]- C44H89NO4---Cer-NP t44:0; Cer-NP t20:0/24:0; [M-H]- C44H89NO4	M+HCOO 1-	740.675	49.3	33.1	30.9	49.9	38.2	48	36.7	35.7	45.5	37.3	5.6	5.63	5.62	5.62	5.63	5.61	5.62	5.62	5.61	5.62	0.7	0.68	0.72	0.68	0.69	0.69	0.74	0.52	0.64	0.68
179		PE 36:2; [M-H]-; GPEtn(18:0/18:2(2E,4E)) C41H78NO8P---PE 36:2; [M-H]-; GPEtn(18:0/18:2(6Z,9Z)) C41H78NO8P---PE 36:2; [M-H]-; GPEtn(18:0/18:2(9E,10E)) C41H78NO8P---PE 36:2; [M-H]-; GPEtn(18:0/18:2(9E,12E)) C41H78NO8P---PE 36:2; [M-H]-; GPEtn(18:0/18:2(9Z,11Z)) C41H78NO8P---PE 36:2; [M-H]-; GPEtn(18:0/18:2(9Z,12Z)) C41H78NO8P---PE 36:2; [M-H]-; GPEtn(18:2(2E,4E)/18:0) C41H78NO8P---PE 36:2; [M-H]-; …	M-H 1-	742.539		226	302.9	249.1		221	184.7			281.9		3.82	3.81	3.81		3.81	3.81			3.81		0.6	0.6	0.59		0.58	0.59			0.59
180		1-Stearoyl-2-linoleoyl-sn-glycero-3-phosphoethanolamine [M-H]- C41H78NO8P NIST 1150615---PE 36:2; PE 18:0-18:2; [M-H]- C41H78NO8P	M-H 1-	742.54	4788.9	4034.4	3262.2	3348.2	6119.2	2930.8	2597.6	2633.5	5252.6	3506.6	4.27	4.26	4.28	4.28	4.28	4.26	4.26	4.26	4.26	4.28	0.94	0.93	0.93	0.93	0.94	0.87	0.92	0.94	0.87	0.93
181		PE 36:1; [M-H]-; GPEtn(18:0/18:1(11E)) C41H80NO8P---PE 36:1; [M-H]-; GPEtn(18:0/18:1(11Z)) C41H80NO8P---PE 36:1; [M-H]-; GPEtn(18:0/18:1(13Z)) C41H80NO8P---PE 36:1; [M-H]-; GPEtn(18:0/18:1(17Z)) C41H80NO8P---PE 36:1; [M-H]-; GPEtn(18:0/18:1(4E)) C41H80NO8P---PE 36:1; [M-H]-; GPEtn(18:0/18:1(6Z)) C41H80NO8P---PE 36:1; [M-H]-; GPEtn(18:0/18:1(7Z)) C41H80NO8P---PE 36:1; [M-H]-; GPEtn(18:0/18:1(9E)) …	M-H 1-	744.554	248.1						144		246.5		4.06						4.07		4.07		0.6						0.59		0.58
182		PE 36:1; PE 18:0-18:1; [M-H]- C41H80NO8P	M-H 1-	744.555	895.3	592.3	573.1	666.3	836.8	507.1	444.2	487.7	1042.8	542.4	4.51	4.5	4.49	4.49	4.5	4.49	4.49	4.5	4.51	4.49	0.9	0.86	0.9	0.9	0.88	0.9	0.93	0.91	0.88	0.87
183		HexCer-NDS d34:1; HexCer-NDS d14:0/20:1; [M-H]- C40H77NO8---HexCer-NS d34:1; HexCer-NS d18:1/16:0; [M-H]- C40H77NO8	M+HCOO 1-	744.561			150.5	150.3		66.6							3.83	3.84		3.81							0.64	0.74		0.71
184		PEtOH 34:2; PEtOH 16:1-18:1; [M-H]- C39H73O8P	M+HCOO 1-	745.497							26.9			39.4							3.26			3.28							0.7			0.83
185		PEtOH 34:2; PEtOH 16:0-18:2; [M-H]- C39H73O8P	M+HCOO 1-	745.502		125.3					98					3.48					3.49					0.86					0.82
185		PG 34:2; PG 16:0-18:2; [M-H]- C40H75O10P	M-H 1-	745.502	181.4		198.5	206.9	222.4	115.5		210.3	162	111.9	3.49		3.49	3.49	3.47	3.47		3.49	3.5	3.49	0.89		0.88	0.85	0.88	0.89		0.9	0.88	0.88
186		SM d34:2; SM d14:0/20:2; [M+FA-H]- C39H77N2O6P---SM d34:2; SM d18:2/16:0; [M+FA-H]- C39H77N2O6P	M+HCOO 1-	745.549	96	54.5	101.7	76.5	94	51.7	43.9	118.4	114.4	77	3.38	3.37	3.38	3.36	3.36	3.37	3.37	3.37	3.37	3.37	0.99	0.96	0.95	0.98	0.96	0.98	0.97	0.98	0.96	0.97
187		OxPE 34:1+3O; OxPE 16:0-18:1+3O ; [M-H]- C39H76NO11P	M-H2O-H 1-	746.494	71.1	90.4	59.5					71.8		77.7	2.85	2.82	2.78					2.77		2.77	0.84	0.83	0.77					0.89		0.85
188		OxPE 34:2+2O; OxPE 16:0-18:2+2O ; [M-H]- C39H74NO10P	M-H 1-	746.496			167		495			97.4		122.6			3.02		3.02			3.03		3.02			0.85		0.93			0.87		0.83
189		PE 38:7e; PE 18:3e/20:4; [M-H]- C43H74NO7P---plasmenyl-PE 38:6; [M-H]-; PE(P-16:0/22:6(4Z,7Z,10Z,13Z,16Z,19Z)) C43H74NO7P	M-H 1-	746.513	791.1	374.5	465.3	458.9	449.3	351.2	272.2	2046.6	644.7	396.5	4	4.01	4	4	4.01	4	4	4	4	4	0.81	0.76	0.82	0.84	0.77	0.76	0.84	0.82	0.83	0.76
190		1-Hexadecanoyl-2-(9Z-octadecenoyl)-sn-glycero-3-phospho-(1'-rac-glycerol) [M-H]- C40H77O10P NIST 1035732---1-Hexadecanoyl-2-(9Z-octadecenoyl)-sn-glycero-3-phospho-(1'-rac-glycerol) [M-H]- C40H77O10P NIST 1035738---1-Hexadecanoyl-2-(9Z-octadecenoyl)-sn-glycero-3-phospho-(1'-rac-glycerol) [M-H]- C40H77O10P NIST 1035744	M-H 1-	747.519	450.9	381.2		830.1	419.5	503.5	384.4	849.1	928.3	533.2	3.7	3.69		3.69	3.69	3.71	3.71	3.71	3.69	3.71	0.86	0.91		0.93	0.9	0.91	0.92	0.92	0.93	0.91
191		SM d34:1; SM d18:1/16:0; [M+FA-H]- C39H79N2O6P	M+HCOO 1-	747.566	2972.9	1893	2919.8	2782.5	2885.1	1895.4	1504.6	2427.7	3705.2	2276.1	3.64	3.63	3.64	3.62	3.63	3.62	3.62	3.64	3.62	3.62	0.99	0.98	0.98	0.99	0.98	0.99	0.98	0.98	0.98	0.98
192		PC 30:1; PC 14:0-16:1; [M+FA-H]- C38H74NO8P	M+HCOO 1-	748.512	38.1	26	62.1	79.7	56.7		33.5	56.3	89.3	54.1	3.41	3.37	3.38	3.41	3.41		3.39	3.42	3.4	3.4	0.73	0.9	0.88	0.84	0.86		0.84	0.9	0.89	0.92
193		PE 38:6e; PE 18:2e/20:4; [M-H]- C43H76NO7P---plasmenyl-PE 38:5; [M-H]-; PE(P-16:0/22:5(4Z,7Z,10Z,13Z,16Z)) C43H76NO7P---plasmenyl-PE 38:5; [M-H]-; PE(P-16:0/22:5(7Z,10Z,13Z,16Z,19Z)) C43H76NO7P	M-H 1-	748.529	1013.6	488.2	620.6	676.5	616.6	745.6	533.5	1021.2	1240.2	468.9	4.1	4.12	4.11	4.11	4.12	4.11	4.11	4.07	4.11	4.11	0.78	0.76	0.77	0.69	0.77	0.85	0.84	0.81	0.85	0.72
194		SM d34:0; SM d14:0/20:0; [M+FA-H]- C39H81N2O6P---SM d34:0; SM d18:0/16:0; [M+FA-H]- C39H81N2O6P	M+HCOO 1-	749.581	173.9	79.1	90	89.7	417.9	252.9	210.8	164	87.8	74.8	3.77	3.78	3.77	3.77	3.77	3.76	3.76	3.77	3.76	3.78	0.98	0.94	0.96	0.98	0.97	0.94	0.98	0.98	0.95	0.97
195		PE 37:5; PE 17:1-20:4; [M-H]- C42H74NO8P---PE 37:5; [M-H]-; GPEtn(17:1(9Z)/20:4(5E,8E,11E,14E)) C42H74NO8P---PE 37:5; [M-H]-; GPEtn(17:1(9Z)/20:4(5Z,8Z,11Z,14Z)) C42H74NO8P---PE 37:5; [M-H]-; GPEtn(17:1(9Z)/20:4(7E,10E,13E,16E)) C42H74NO8P---PE 37:5; [M-H]-; GPEtn(20:4(5E,8E,11E,14E)/17:1(9Z)) C42H74NO8P---PE 37:5; [M-H]-; GPEtn(20:4(5Z,8Z,11Z,14Z)/17:1(9Z)) C42H74NO8P---PE 37:5; [M-H]-; GPEtn(20…	M-H 1-	750.508	82		67.1		75.7	100.4	67.2		161.3		3.79		3.77		3.78	3.77	3.77		3.77		0.66		0.65		0.6	0.79	0.78		0.77
196		PC 30:0; PC 14:0-16:0; [M+FA-H]- C38H76NO8P	M+HCOO 1-	750.527	169.4		213.6	201.2	206.8	141.5	118.8	380.4	288	172.4	3.66		3.66	3.66	3.67	3.71	3.71	3.66	3.69	3.67	0.85		0.81	0.73	0.78	0.81	0.87	0.86	0.8	0.82
197		plasmenyl-PE 38:4; [M-H]-; PE(P-16:0/22:4(7Z,10Z,13Z,16Z)) C43H78NO7P---plasmenyl-PE 38:4; [M-H]-; PE(P-18:0/20:4(5E,8E,11E,14E)) C43H78NO7P---plasmenyl-PE 38:4; [M-H]-; PE(P-18:0/20:4(5Z,8Z,11Z,14Z)) C43H78NO7P---plasmenyl-PE 38:4; [M-H]-; PE(P-18:0/20:4(7E,10E,13E,16E)) C43H78NO7P	M-H 1-	750.544	1993.4	867.1	1174.1	1090	1256.5	1108.4	831.3	729.9	2311.9	1077.7	4.4	4.39	4.38	4.38	4.39	4.38	4.39	4.39	4.38	4.39	0.95	0.95	0.94	0.96	0.94	0.95	0.93	0.94	0.95	0.94
198		PEtOH 38:4; PEtOH 18:0-20:4; [M-H]- C43H77O8P	M-H 1-	751.529		155.6										3.99										0.91
199		OxPE 36:4+2O; OxPE 16:0-20:4+2O ; [M-H]- C41H74NO10P	M-H2O-H 1-	752.489		154.5	215.7									3.05	3.06									0.83	0.78
199		PE(16:0/8,9-EpETE) C41H72NO9P	M-H 1-	752.488					359.9				30.4	191.9					3.11				3.1	3.05					0.78				0.95	0.76
200		PE 37:4; PE 17:0-20:4; [M-H]- C42H76NO8P	M-H 1-	752.523	606.3	495.4	403.6	361	761	424.4	329.3	96.5	849.7	483.2	4.06	4.07	4.07	4.07	4.07	4.07	4.07	4.07	4.07	4.07	0.93	0.93	0.93	0.91	0.95	0.93	0.92	0.93	0.93	0.92
201		PE 38:4e; PE 16:0e/22:4; [M-H]- C43H80NO7P---PE 38:4e; PE 18:0e/20:4; [M-H]- C43H80NO7P	M-H 1-	752.556				348.8	369.1									4.41	4.41									0.8	0.81
202		OxPE 36:3+2O; OxPE 18:1-18:2+2O ; [M-H]- C41H76NO10P	M-H2O-H 1-	754.502								229										3.13										0.67
202		PE(16:0/14,15-EET) C41H74NO9P---PE(16:0/20-HETE) C41H74NO9P	M-H 1-	754.502	178	306.3	464.7	496.8	644.2		34.6		172.1	395	3.21	3.14	3.14	3.24	3.28		3.09		3.16	3.19	0.75	0.79	0.73	0.91	0.83		0.8		0.81	0.71
203		PE 37:3; PE 19:1-18:2; [M-H]- C42H78NO8P	M-H 1-	754.535						131.6										4.11										0.65
204		Cer-AP t44:1; Cer-AP t18:1/26:0; [M-H]- C44H87NO5---Cer-AP t44:1; Cer-AP t20:1/24:0; [M-H]- C44H87NO5---Cer-EODS d44:0; Cer-EODS d14:0/14:0-O-16:0; [M-H]- C44H87NO5	M+HCOO 1-	754.656	36.6	32	30.1	36.9		44.6	38.7		30.6		5.18	5.18	5.19	5.17		5.17	5.17		5.18		0.67	0.76	0.56	0.89		0.7	0.79		0.78
205		PE(18:1/13-HODE) C41H76NO9P---PE(18:1/9-HODE) C41H76NO9P	M-H 1-	756.516		219.2			418.4			268.6	72.3			3.16			3.21			3.22	3.07			0.95			0.92			0.8	0.93
206		PE 37:2; PE 19:0-18:2; [M-H]- C42H80NO8P	M-H 1-	756.554	143.4	139.5	117.2	67.5	227.9	108.1	77	89.7	204.5	107.8	4.42	4.41	4.45	4.41	4.44	4.41	4.41	4.43	4.4	4.41	0.85	0.77	0.86	0.78	0.92	0.66	0.67	0.89	0.79	0.8
207		plasmenyl-PE 38:1; [M-H]-; PE(P-20:0/18:1(11E)) C43H84NO7P---plasmenyl-PE 38:1; [M-H]-; PE(P-20:0/18:1(11Z)) C43H84NO7P---plasmenyl-PE 38:1; [M-H]-; PE(P-20:0/18:1(13Z)) C43H84NO7P---plasmenyl-PE 38:1; [M-H]-; PE(P-20:0/18:1(17Z)) C43H84NO7P---plasmenyl-PE 38:1; [M-H]-; PE(P-20:0/18:1(4E)) C43H84NO7P---plasmenyl-PE 38:1; [M-H]-; PE(P-20:0/18:1(6Z)) C43H84NO7P---plasmenyl-PE 38:1; [M-H]-; PE(P-20:…	M-H 1-	756.591								34.6										4.99										0.63
208		Cer-AP t44:0; Cer-AP t18:0/26:0; [M-H]- C44H89NO5---Cer-AP t44:0; Cer-AP t20:0/24:0; [M-H]- C44H89NO5	M+HCOO 1-	756.665	63.3					86.3	41.8	72.2		27.9	5.48					5.49	5.48	5.49		5.5	0.77					0.66	0.77	0.7		0.75
209		PE 34:3; [M-H]-; GPEtn(16:0/18:3(6Z,9Z,12Z)) C39H72NO8P---PE 34:3; [M-H]-; GPEtn(16:0/18:3(9Z,12Z,15Z)) C39H72NO8P---PE 34:3; [M-H]-; GPEtn(18:3(6Z,9Z,12Z)/16:0) C39H72NO8P---PE 34:3; [M-H]-; GPEtn(18:3(9Z,12Z,15Z)/16:0) C39H72NO8P	M+HCOO 1-	758.5			50.8										3.4										0.53
209		PS 34:2; PS 16:0-18:2; [M-H]- C40H74NO10P	M-H 1-	758.497		10.9				60.4	47.9					3.45				3.43	3.45					0.67				0.85	0.8
210		PE(18:0/9-HODE) C41H78NO9P	M-H 1-	758.531	27.9	46.1		40.6	154.8			142.4			3.33	3.34		3.33	3.47			3.28			0.88	0.9		0.82	0.91			0.98
211		PE 38:7; PE 16:1-22:6; [M-H]- C43H72NO8P---PE 38:7; [M-H]-; GPEtn(16:1(7Z)/22:6(4Z,7Z,10Z,13Z,16Z,19Z)) C43H72NO8P---PE 38:7; [M-H]-; GPEtn(16:1(9Z)/22:6(4Z,7Z,10Z,13Z,16Z,19Z)) C43H72NO8P---PE 38:7; [M-H]-; GPEtn(22:6(4Z,7Z,10Z,13Z,16Z,19Z)/16:1(7Z)) C43H72NO8P---PE 38:7; [M-H]-; GPEtn(22:6(4Z,7Z,10Z,13Z,16Z,19Z)/16:1(9Z)) C43H72NO8P	M-H 1-	760.493	768.2	574.6	671.2	539.7	821.3	762.2	643.3	104.1	1535	595.2	3.57	3.56	3.55	3.58	3.56	3.56	3.56	3.56	3.56	3.56	0.85	0.8	0.84	0.84	0.85	0.86	0.86	0.62	0.84	0.86
212		SM d35:1; SM d14:0/21:1; [M+FA-H]- C40H81N2O6P	M+HCOO 1-	761.58								56.6										3.81										0.98
213		PE 38:6; PE 16:0-22:6; [M-H]- C43H74NO8P---PE 38:6; PE 18:2-20:4; [M-H]- C43H74NO8P	M-H 1-	762.509	19630.9	15642.2	14161.7	16448.4	20737.3	12547.7	10719.2	4220.7	18706.2	15592.2	3.83	3.84	3.83	3.83	3.84	3.83	3.84	3.83	3.84	3.83	0.85	0.85	0.85	0.86	0.86	0.85	0.86	0.85	0.85	0.86
214		PC 31:1; PC 15:0-16:1; [M+FA-H]- C39H76NO8P	M+HCOO 1-	762.52								47.5										3.6										0.7
215		PC 32:1e; PC 16:1e/16:0; [M+FA-H]- C40H80NO7P	M+HCOO 1-	762.564	42.1	36.4	38.6		33.6			150.8		31.8	4.19	4.18	4.19		4.18			4.17		4.19	0.82	0.82	0.86		0.88			0.94		0.89
216		PE 38:5; PE 18:1-20:4; [M-H]- C43H76NO8P	M-H 1-	764.522	12558.1	6252.7	9706.1	9286.3	10088.8	10972.5	8296.9	2310.2	17877.6	9748.7	3.95	3.92	3.96	3.96	3.95	3.96	3.96	3.92	3.96	3.94	0.87	0.86	0.9	0.89	0.89	0.91	0.89	0.91	0.91	0.9
217		PC 32:0e; PC 16:0e/16:0; [M+FA-H]- C40H82NO7P	M+HCOO 1-	764.58	88.3	101.7	165.6	134.7	111.7	116.1	76.2	132.6	186.5	135.2	4.21	4.22	4.21	4.21	4.22	4.21	4.22	4.22	4.21	4.22	0.93	0.93	0.94	0.94	0.93	0.91	0.9	0.91	0.93	0.93
218		GlcADG 34:3; GlcADG 16:1-18:2; [M-H]- C43H74O11	M-H 1-	765.516	36.6	132.8		59.4		19.2			46.4	35.9	3.26	3.24		3.32		3.27			3.24	3.3	0.55	0.81		0.78		0.87			0.59	0.59
219		PE 38:4; PE 18:1-20:3; [M-H]- C43H78NO8P	M-H 1-	766.537	3716.3		4086.5		21994.3	11883.5					4		4		4.1	4.09					0.91		0.9		0.85	0.89
220		PE 38:4; PE 18:0-20:4; [M-H]- C43H78NO8P	M-H 1-	766.54	23134.2	19161.9	21339.9	22895.4	26819.4	14685.6	12093.1	4929.3	24971	21783.1	4.25	4.24	4.23	4.24	4.24	4.24	4.24	4.24	4.23	4.24	0.93	0.92	0.93	0.93	0.93	0.92	0.93	0.93	0.93	0.92
221		GlcADG 34:2; GlcADG 16:0-18:2; [M-H]- C43H76O11	M-H 1-	767.528	78.3	71.7		122.1	137.5	41.2			101.6	90.7	3.49	3.5		3.49	3.5	3.49			3.5	3.49	0.91	0.89		0.8	0.81	0.9			0.74	0.75
222		1,2-Di-(9Z-octadecenoyl)-sn-glycero-3-phosphoserine [M-H-NH3]- C42H78NO10P NIST 1149484	M-H2O-H 1-	768.522									168.8										3.52										0.81
223		PE 38:3; PE 18:0-20:3; [M-H]- C43H80NO8P	M-H 1-	768.549	4484.2		3006.5	3316.8		2638.8	2390	1147.5	5247.5	4198	4.27		4.39	4.39		4.26	4.26	4.28	4.28	4.28	0.94		0.92	0.94		0.94	0.92	0.84	0.94	0.92
224		PE 38:3; [M-H]-; GPEtn(18:2(2E,4E)/20:1(11E)) C43H80NO8P---PE 38:3; [M-H]-; GPEtn(18:2(2E,4E)/20:1(11Z)) C43H80NO8P---PE 38:3; [M-H]-; GPEtn(18:2(2E,4E)/20:1(13E)) C43H80NO8P---PE 38:3; [M-H]-; GPEtn(18:2(2E,4E)/20:1(13Z)) C43H80NO8P---PE 38:3; [M-H]-; GPEtn(18:2(6Z,9Z)/20:1(11E)) C43H80NO8P---PE 38:3; [M-H]-; GPEtn(18:2(6Z,9Z)/20:1(11Z)) C43H80NO8P---PE 38:3; [M-H]-; GPEtn(18:2(6Z,9Z)/20:1(13E))…	M-H 1-	768.556							108.3		175.2								3.88		3.89								0.52		0.54
225		Cer-ADS d46:0; Cer-ADS d26:0/20:0; [M-H]- C46H93NO4---Cer-ADS d46:0; Cer-ADS d27:0/19:0; [M-H]- C46H93NO4---Cer-ADS d46:0; Cer-ADS d28:0/18:0; [M-H]- C46H93NO4---Cer-ADS d46:0; Cer-ADS d29:0/17:0; [M-H]- C46H93NO4---Cer-NP t46:0; Cer-NP t20:0/26:0; [M-H]- C46H93NO4---Cer-NP t46:0; Cer-NP t22:0/24:0; [M-H]- C46H93NO4	M+HCOO 1-	768.707	36.1		31.8	40.6	33.7	46.2		42.5	33.1	29.7	5.86		5.85	5.85	5.86	5.86		5.86	5.86	5.85	0.71		0.61	0.64	0.66	0.7		0.63	0.68	0.61
226		1,2-Dilinoleoyl-sn-glycero-3-phospho-(1'-rac-glycerol) [M-H]- C42H75O10P NIST 1149601---1,2-Dilinoleoyl-sn-glycero-3-phospho-(1'-rac-glycerol) [M-H]- C42H75O10P NIST 1149605	M-H 1-	769.502	97.1	94	212.3		296	79.4		89.3		80.8	3.16	3.16	3.29		3.26	3.16		3.15		3.15	0.91	0.89	0.83		0.89	0.92		0.92		0.8
226		PEtOH 36:4; PEtOH 16:0-20:4; [M-H]- C41H73O8P	M+HCOO 1-	769.496				226.7										3.17										0.82
227		PG 36:4; PG 16:0-20:4; [M-H]- C42H75O10P	M-H 1-	769.503	48.1										3.47										0.87
228		OxPE 36:3+2O(1Cyc); OxPE 16:0-20:3+2O(1Cyc); [M-H]- C41H74NO10P---OxPE 36:4+2O; OxPE 16:0-20:4+2O ; [M-H]- C41H74NO10P	M-H 1-	770.498		108.8	806.1	760.2	1519.5			169.9		739.8		3.09	3.19	3.09	3.19			3.08		3.09		0.94	0.8	0.79	0.79			0.65		0.81
229		PE 40:9e; PE 18:3e/22:6; [M-H]- C45H74NO7P	M-H 1-	770.52								73.6										3.79										0.51
230		PE 38:2; PE 18:0-20:2; [M-H]- C43H82NO8P---PE 38:2; PE 18:1-20:1; [M-H]- C43H82NO8P---PE 38:2; [M-H]-; GPEtn(18:0/20:2(11Z,14Z)) C43H82NO8P---PE 38:2; [M-H]-; GPEtn(18:0/20:2(5Z,8Z)) C43H82NO8P---PE 38:2; [M-H]-; GPEtn(20:2(11Z,14Z)/18:0) C43H82NO8P---PE 38:2; [M-H]-; GPEtn(20:2(5Z,8Z)/18:0) C43H82NO8P	M-H 1-	770.569	513.8	495.8	400.2	382		544.8	469.4	174.9	614.7	417.6	4.57	4.56	4.56	4.56		4.43	4.41	4.56	4.55	4.56	0.73	0.68	0.7	0.73		0.77	0.76	0.63	0.82	0.78
231		PE 38:2; PE 20:0-18:2; [M-H]- C43H82NO8P---PE 38:2; [M-H]-; GPEtn(18:2(2E,4E)/20:0) C43H82NO8P---PE 38:2; [M-H]-; GPEtn(18:2(6Z,9Z)/20:0) C43H82NO8P---PE 38:2; [M-H]-; GPEtn(18:2(9E,10E)/20:0) C43H82NO8P---PE 38:2; [M-H]-; GPEtn(18:2(9E,12E)/20:0) C43H82NO8P---PE 38:2; [M-H]-; GPEtn(18:2(9Z,11Z)/20:0) C43H82NO8P---PE 38:2; [M-H]-; GPEtn(18:2(9Z,12Z)/20:0) C43H82NO8P---PE 38:2; [M-H]-; GPEtn(20:0/…	M-H 1-	770.569	180.4	145.6	204.8	313.4	222.5,773.5			121.6	273.2	154.8	4.17	4.16	4.17	4.19	4.16,4.59			4.24	4.19	4.15	0.6	0.59	0.57	0.56	0.62,0.72			0.56	0.56	0.61
232		OxPG 36:2+1O; OxPG 18:1-18:1+1O; [M-H]- C42H79O11P	M-H2O-H 1-	771.516	147.2	133.7	280.1	259.8		161.6	109.4		232.4	188.2	3.36	3.37	3.36	3.34		3.35	3.37		3.35	3.34	0.94	0.95	0.91	0.93		0.95	0.92		0.93	0.93
232		PG 36:3; PG 18:1-18:2; [M-H]- C42H77O10P	M-H 1-	771.516								47.5,98.7										3.54,3.34										0.86,0.87
233		OxPE 36:3+2O; OxPE 18:1-18:2+2O ; [M-H]- C41H76NO10P	M-H 1-	772.511	85.1			279.2				323.2			2.87			3.06				3.07			0.63			0.89				0.89
234		OxPE 36:2+3O; OxPE 18:1-18:1+3O ; [M-H]- C41H78NO11P	M-H2O-H 1-	772.511								129.7		152.1								2.82		2.81								0.69		0.82
235		PS 35:2; PS 17:0-18:2; [M-H]- C41H76NO10P	M-H 1-	772.514					287.3										3.54										0.51
236		PC 32:3; PC 14:0-18:3; [M+FA-H]- C40H74NO8P	M+HCOO 1-	772.52							53.7										3.35										0.8
237		PE 40:8e; PE 18:2e/22:6; [M-H]- C45H76NO7P	M-H 1-	772.529	229.5	88.5	123.7	107.3	125.8	155.9	115.3	406.8	288.6	78.6	4.04	4.05	4.04	4.05	4.05	4.05	4.05	4.05	4.05	4.05	0.81	0.73	0.74	0.73	0.74	0.77	0.77	0.83	0.76	0.81
238		PE 38:1; PE 18:0-20:1; [M-H]- C43H84NO8P	M-H 1-	772.586	176.7	177.4	133	143.9	265.8	62.1	51.5	87.8	139.6	160.2	4.79	4.8	4.8	4.8	4.81	4.81	4.79	4.8	4.79	4.8	0.82	0.86	0.88	0.91	0.85	0.73	0.64	0.89	0.84	0.9
239		HexCer-NDS d36:1; HexCer-NDS d14:0/22:1; [M-H]- C42H81NO8	M+HCOO 1-	772.592								54.8										4.15										0.65
240		PEtOH 40:7; PEtOH 18:1-22:6; [M-H]- C45H75O8P	M-H 1-	773.514		121.2										3.65										0.81
241		OxPG 36:1+1O; OxPG 18:1-18:0+1O; [M-H]- C42H81O11P	M-H2O-H 1-	773.532			290	262.8		185.1	122.6			192.1			3.57	3.56		3.56	3.56			3.56			0.92	0.92		0.93	0.92			0.91
241		PEtOH 36:2; PEtOH 18:0-18:2; [M-H]- C41H77O8P	M+HCOO 1-	773.531	421.3										3.64										0.86
241		1-Linoleoyl-2-stearoyl-sn-glycero-3-phospho-(1'-sn-glycerol) [M-H]- C42H79O10P NIST 1035747---PG 36:2; PG 16:0-20:2; [M-H]- C42H79O10P---PG 36:2; PG 18:0-18:2; [M-H]- C42H79O10P	M-H 1-	773.533		224.8	155.7	166.7	360.1	119.5	80.4	212.5				3.65	3.8	3.8	3.6	3.78	3.8	3.79				0.65	0.89	0.86	0.8	0.76	0.82	0.72
242		SM d36:2; SM d14:0/22:2; [M+FA-H]- C41H81N2O6P	M+HCOO 1-	773.58								76.1										3.73										0.88
243		PE 35:2; [M-H]-; GPEtn(17:1(9Z)/18:1(11E)) C40H76NO8P---PE 35:2; [M-H]-; GPEtn(17:1(9Z)/18:1(11Z)) C40H76NO8P---PE 35:2; [M-H]-; GPEtn(17:1(9Z)/18:1(13Z)) C40H76NO8P---PE 35:2; [M-H]-; GPEtn(17:1(9Z)/18:1(17Z)) C40H76NO8P---PE 35:2; [M-H]-; GPEtn(17:1(9Z)/18:1(4E)) C40H76NO8P---PE 35:2; [M-H]-; GPEtn(17:1(9Z)/18:1(6Z)) C40H76NO8P---PE 35:2; [M-H]-; GPEtn(17:1(9Z)/18:1(7Z)) C40H76NO8P---PE 35:2; […	M+HCOO 1-	774.519									189.5										3.73										0.7
243		PE 39:7; [M-H]-; GPEtn(17:1(9Z)/22:6(4Z,7Z,10Z,13Z,16Z,19Z)) C44H74NO8P---PE 39:7; [M-H]-; GPEtn(22:6(4Z,7Z,10Z,13Z,16Z,19Z)/17:1(9Z)) C44H74NO8P	M-H 1-	774.515	74.9					91.7					3.72					3.73					0.61					0.58
244		OxPE 36:1+3O; OxPE 18:0-18:1+3O ; [M-H]- C41H80NO11P	M-H2O-H 1-	774.526		43.5						162				2.99						3.03				0.72						0.72
245		OxPE 36:2+2O; OxPE 18:0-18:2+2O ; [M-H]- C41H78NO10P	M-H 1-	774.528			455.2	420.3	208.3			327.9					3.3	3.31	3.04			3.31					0.85	0.88	0.65			0.89
246		PC 32:2; PC 14:0-18:2; [M+FA-H]- C40H76NO8P	M+HCOO 1-	774.529	522.2	392.9	766.1	574.4	668.6	670.8	612.4	517.2	1566.4	759.3	3.47	3.48	3.47	3.47	3.47	3.47	3.47	3.49	3.47	3.47	0.85	0.83	0.81	0.83	0.87	0.88	0.84	0.9	0.86	0.86
247		plasmenyl-PE 40:6; [M-H]-; PE(P-18:0/22:6(4Z,7Z,10Z,13Z,16Z,19Z)) C45H78NO7P	M-H 1-	774.544	464.5	288.3	343.3	218.6	400	252.6	201.6	1352.4	488	316.9	4.33	4.35	4.34	4.34	4.35	4.34	4.34	4.35	4.34	4.34	0.8	0.84	0.8	0.79	0.79	0.8	0.83	0.83	0.83	0.84
248		PEtOH 40:6; PEtOH 18:0-22:6; [M-H]- C45H77O8P	M-H 1-	775.529		48.6										3.92										0.77
249		SM d36:1; SM d14:0/22:1; [M+FA-H]- C41H83N2O6P---SM d36:1; SM d18:1/18:0; [M+FA-H]- C41H83N2O6P	M+HCOO 1-	775.597	944.2	262	433.6	411.5	393.3	206.5	189.5	2287.4	383.8	296.3	4	3.99	3.98	3.98	3.99	3.98	3.98	3.98	3.98	3.98	0.97	0.94	0.96	0.97	0.96	0.95	0.96	0.98	0.98	0.96
250		PE 39:6; PE 17:0-22:6; [M-H]- C44H76NO8P---PE 39:6; [M-H]-; GPEtn(17:0/22:6(4Z,7Z,10Z,13Z,16Z,19Z)) C44H76NO8P---PE 39:6; [M-H]-; GPEtn(22:6(4Z,7Z,10Z,13Z,16Z,19Z)/17:0) C44H76NO8P	M-H 1-	776.526		237.4			299.3							3.99			3.99							0.56			0.55
251		PC 32:1; PC 16:0-16:1; [M+FA-H]- C40H78NO8P	M+HCOO 1-	776.545	1243.4	1545.2	1821.9	2140.2	1584.5	1289.6	1390.9	1562.3	2175.9	1555.5	3.74	3.74	3.73	3.73	3.73	3.73	3.73	3.75	3.73	3.73	0.94	0.94	0.93	0.92	0.93	0.92	0.94	0.93	0.92	0.94
252		PE 40:6e; PE 18:2e/22:4; [M-H]- C45H80NO7P---plasmenyl-PE 40:5; [M-H]-; PE(P-18:0/22:5(4Z,7Z,10Z,13Z,16Z)) C45H80NO7P---plasmenyl-PE 40:5; [M-H]-; PE(P-18:0/22:5(7Z,10Z,13Z,16Z,19Z)) C45H80NO7P	M-H 1-	776.558	491.6	258.4	378.7	309.4	381.9	304	236.6	727.8	592.4		4.4	4.39	4.41	4.41	4.41	4.38	4.39	4.41	4.38		0.75	0.72	0.81	0.83	0.77	0.93	0.84	0.86	0.89
253		SM d36:0; SM d14:0/22:0; [M+FA-H]- C41H85N2O6P	M+HCOO 1-	777.611	32.9							47.7			4.12							4.13			0.96							0.95
254		OxPE 38:5+1O(1Cyc); OxPE 16:0-22:5+1O(1Cyc); [M-H]- C43H74NO9P---PE(18:1/14,15-EpETE) C43H74NO9P---PE(18:1/5-HEPE) C43H74NO9P	M-H 1-	778.502		450.1	632.8		844.8			481.8		566.3		3.16	3.17		3.17			3.15		3.11		0.76	0.72		0.77			0.55		0.88
254		OxPE 38:5+2O; OxPE 16:0-22:5+2O ; [M-H]- C43H76NO10P	M-H2O-H 1-	778.502				628.5		36			293.3					3.09		3			3.11					0.79		0.91			0.69
255		PE 39:5; PE 19:1-20:4; [M-H]- C44H78NO8P	M-H 1-	778.546									220.3										4.11										0.67
256		PC 32:0; PC 16:0-16:0; [M+FA-H]- C40H80NO8P	M+HCOO 1-	778.561	4533.5	3657.1	5627.8	4933.4	4427.7	3188	2530.1	5943.2	5608.7	4582.8	4	4.01	4	4	3.99	4	4	4	4	4	0.93	0.93	0.93	0.93	0.93	0.92	0.92	0.93	0.94	0.93
257		HexCer-AP t34:0; HexCer-AP t18:0/16:0; [M-H]- C40H79NO10	M+HCOO 1-	778.567		11.7			22	13.4						3.59			3.58	3.59						0.71			0.59	0.76
258		plasmenyl-PE 40:4; [M-H]-; PE(P-18:0/22:4(7Z,10Z,13Z,16Z)) C45H82NO7P	M-H 1-	778.574	592.2	413.7	407.6	334	465.4	338.2	240.9	419	701.8	370.9	4.68	4.69	4.67	4.67	4.7	4.68	4.69	4.63	4.68	4.69	0.95	0.98	0.95	0.94	0.98	0.96	0.99	0.96	0.97	0.96
259		PE(18:1/18-HETE) C43H76NO9P---PE(18:1/20-HETE) C43H76NO9P---PE(18:1/5-HETE) C43H76NO9P---PE(18:1/8,9-EET) C43H76NO9P	M-H 1-	780.517	383.5	535.4	771.9	767.2	297.8	49.5	140.6	384.6	346.8	844.6	3.23	3.26	3.38	3.3	3.15	3.32	3.22	3.13	3.05	3.28	0.9	0.86	0.77	0.85	0.79	0.71	0.84	0.67	0.74	0.91
260		OxPE 38:4+2O; OxPE 18:0-20:4+2O ; [M-H]- C43H78NO10P	M-H2O-H 1-	780.518					195.5			77.2							3.69			3.68							0.79			0.74
261		PE 39:4; PE 19:0-20:4; [M-H]- C44H80NO8P---PE 39:4; [M-H]-; GPEtn(19:0/20:4(5E,8E,11E,14E)) C44H80NO8P---PE 39:4; [M-H]-; GPEtn(19:0/20:4(5Z,8Z,11Z,14Z)) C44H80NO8P---PE 39:4; [M-H]-; GPEtn(19:0/20:4(7E,10E,13E,16E)) C44H80NO8P---PE 39:4; [M-H]-; GPEtn(20:4(5E,8E,11E,14E)/19:0) C44H80NO8P---PE 39:4; [M-H]-; GPEtn(20:4(5Z,8Z,11Z,14Z)/19:0) C44H80NO8P---PE 39:4; [M-H]-; GPEtn(20:4(7E,10E,13E,16E)/1…	M-H 1-	780.555	638.6	585.2	533.2	427.2	954.4	521.3	420.2	183.1	1022.2	632.3	4.4	4.39	4.38	4.38	4.39	4.38	4.39	4.39	4.38	4.39	0.9	0.93	0.9	0.91	0.93	0.96	0.94	0.9	0.92	0.94
262		PE 40:4e; PE 18:0e/22:4; [M-H]- C45H84NO7P	M-H 1-	780.586	213.2		153.9		195.5	140.5			316.5	164.8	4.72		4.73		4.72	4.75			4.75	4.75	0.89		0.84		0.91	0.92			0.87	0.86
263	*	ISF of PS 36:4; PS 18:2-18:2; [M-H]- C42H74NO10P	-	714.508	5170.1	5352.3	3568.8	3468.7	7481.4		3049.9	1135.6	4834.8	3399.2	3.93	3.92	3.92	3.92	3.92		3.92	3.92	3.92	3.92	0.97	0.97	0.95	0.93	0.96		0.96	0.93	0.97	0.96
263	*	PS 36:4; PS 18:2-18:2; [M-H]- C42H74NO10P	M-H 1-	782.495					204.5		147.1			127.7					3.92		3.92			3.94					0.53		0.61			0.56
264		1-Hexadecanoyl-2-(5Z,8Z,11Z,14Z-eicosatetraenoyl)-sn-glycero-3-phosphoserine [M-H]- C42H74NO10P NIST 1148690---PS 36:4; PS 16:0-20:4; [M-H]- C42H74NO10P	M-H 1-	782.499	356.4	323.6	473.5	451.5	261	558.5	389.8		532.9	391.7	3.42	3.41	3.42	3.41	3.41	3.41	3.43		3.43	3.43	0.87	0.83	0.84	0.86	0.79	0.9	0.89		0.87	0.84
265		OxPE 38:3+2O; OxPE 18:0-20:3+2O ; [M-H]- C43H80NO10P---PS 37:2; PS 16:0-21:2; [M-H]- C43H80NO10P	M-H2O-H 1-	782.532	259.9	427.3									3.64	3.58									0.92	0.51
265		PE(18:0/20-HETE) C43H78NO9P---PE(18:0/8,9-EET) C43H78NO9P	M-H 1-	782.532			606.4	687.5	844.7		70.2	360.9	293	623.7			3.64	3.56	3.58		3.67	3.56	3.64	3.6			0.79	0.82	0.85		0.75	0.81	0.75	0.87
266		HexCer-NS d40:1; HexCer-NS d18:1/22:0; [M-H]- C46H89NO8	M-H 1-	782.652				37.2										4.84										0.52
267		Cer-ADS d47:0; Cer-ADS d28:0/19:0; [M-H]- C47H95NO4---Cer-ADS d47:0; Cer-ADS d29:0/18:0; [M-H]- C47H95NO4---Cer-NP t47:0; Cer-NP t21:0/26:0; [M-H]- C47H95NO4---Cer-NP t47:0; Cer-NP t22:0/25:0; [M-H]- C47H95NO4	M+HCOO 1-	782.724	21.2	17.8		22.8	17.9	28	30.7	25.5	17.1	22.3	5.96	5.98		5.97	5.94	5.97	5.98	5.97	5.95	5.96	0.57	0.77		0.66	0.65	0.66	0.66	0.65	0.73	0.66
268		PE 40:9; PE 18:3-22:6; [M-H]- C45H72NO8P	M-H 1-	784.498								34.5										3.43										0.61
269		OxPS 36:2+1O; OxPS 18:1-18:1+1O; [M-H]- C42H78NO11P	M-H2O-H 1-	784.511		61.3					86.8					4.16					4.17					0.56					0.54
270		OxPE 38:3+1O; OxPE 18:0-20:3+1O ; [M-H]- C43H80NO9P	M-H 1-	784.542		87.4										3.69										0.52
271		Cer-AP t46:0; Cer-AP t20:0/26:0; [M-H]- C46H93NO5---Cer-AP t46:0; Cer-AP t22:0/24:0; [M-H]- C46H93NO5	M+HCOO 1-	784.701	33.4			41.4	37.1	63.4	61.6	43.9	28.2	38.2	5.73			5.73	5.74	5.73	5.72	5.7	5.73	5.73	0.77			0.73	0.7	0.78	0.8	0.78	0.78	0.76
272		OxPE 36:4+3O(2Cyc); OxPE 16:0-20:4+3O(2Cyc); [M-H]- C41H74NO11P	M-H 1-	786.494				483.1										2.7										0.57
273		PE 40:8; PE 18:2-22:6; [M-H]- C45H74NO8P---PE 40:8; [M-H]-; GPEtn(18:2(2E,4E)/22:6(4Z,7Z,10Z,13Z,16Z,19Z)) C45H74NO8P---PE 40:8; [M-H]-; GPEtn(18:2(6Z,9Z)/22:6(4Z,7Z,10Z,13Z,16Z,19Z)) C45H74NO8P---PE 40:8; [M-H]-; GPEtn(18:2(9E,10E)/22:6(4Z,7Z,10Z,13Z,16Z,19Z)) C45H74NO8P---PE 40:8; [M-H]-; GPEtn(18:2(9E,12E)/22:6(4Z,7Z,10Z,13Z,16Z,19Z)) C45H74NO8P---PE 40:8; [M-H]-; GPEtn(18:2(9Z,11Z)/22:6(4Z,7Z…	M-H 1-	786.508	387.5	261.9	326.6	165.3	422.6	418.9	294.8	571.6	924	221.9	3.64	3.67	3.64	3.69	3.65	3.69	3.67	3.64	3.64	3.64	0.78	0.75	0.75	0.64	0.7	0.83	0.66	0.89	0.8	0.8
274		PS 36:2; PS 18:0-18:2; [M-H]- C42H78NO10P	M-H 1-	786.527	145	87.1	106.2		108	208.1	146.6	168.9		81.3	3.74	3.76	3.75		3.78	3.77	3.77	3.77		3.77	0.88	0.92	0.84		0.81	0.91	0.85	0.88		0.83
275		PC 34:3e; PC 16:1e/18:2; [M+FA-H]- C42H80NO7P	M+HCOO 1-	786.565								191.9										3.98										0.87
276		PE 40:7; PE 18:1-22:6; [M-H]- C45H76NO8P---PE 40:7; PE 20:3-20:4; [M-H]- C45H76NO8P	M-H 1-	788.524	3956.3	1922.3	2590.8	2317.2	3000.5	3800.7	2970	1935.4	5309.3	2452.9	3.89	3.88	3.87	3.88	3.88	3.88	3.88	3.88	3.88	3.88	0.85	0.88	0.87	0.87	0.86	0.86	0.85	0.85	0.87	0.87
277		PS 36:1; PS 18:0-18:1; [M-H]- C42H80NO10P	M-H 1-	788.541		134.9						563.5				4.02						4				0.59						0.77
278		PC 33:2; PC 15:0-18:2; [M+FA-H]- C41H78NO8P	M+HCOO 1-	788.543	321.6	265.1	322.2	177.9	459.6				602.4	321.7	3.64	3.65	3.64	3.64	3.65				3.64	3.64	0.85	0.82	0.82	0.86	0.89				0.9	0.9
279		PC 34:2e; PC 16:0e/18:2; [M+FA-H]- C42H82NO7P---PC 34:2e; PC 16:2e/18:0; [M+FA-H]- C42H82NO7P	M+HCOO 1-	788.579			48.1	33.2	43.9	42.9	26.9		78.5	48.8			4.04	4.02	4.03	4.02	4.05		4.02	4.03			0.6	0.55	0.61	0.63	0.54		0.63	0.57
280		PC 34:2e; PC 18:2e/16:0; [M+FA-H]- C42H82NO7P	M+HCOO 1-	788.579								64.6										4.24										0.61
281		SM d37:1; SM d14:0/23:1; [M+FA-H]- C42H85N2O6P	M+HCOO 1-	789.61								148										4.15										0.89
282		PS 38:5; PS 18:1-20:4; [M-H]- C44H76NO10P	M-H2O-H 1-	790.501	37.2										4.06										0.52
283		1-Octadecanoyl-2-(4Z,7Z,10Z,13Z,16Z,19Z-docosahexaenoyl)-sn-glycero-3-phosphoethanolamine [M-H]- C45H78NO8P NIST 1148425---PE 40:6; PE 20:2-20:4; [M-H]- C45H78NO8P---PE 40:6; [M-H]-; GPEtn(20:2(11Z,14Z)/20:4(5E,8E,11E,14E)) C45H78NO8P---PE 40:6; [M-H]-; GPEtn(20:2(11Z,14Z)/20:4(5Z,8Z,11Z,14Z)) C45H78NO8P---PE 40:6; [M-H]-; GPEtn(20:2(11Z,14Z)/20:4(7E,10E,13E,16E)) C45H78NO8P---PE 40:6; [M-H]-; GP…	M-H 1-	790.54	1594.6	1259.1	1201.6	1321.3		2967.6			4788	978.7	3.91	3.92	3.92	3.92		4.04			4.03	3.9	0.75	0.64	0.69	0.54		0.75			0.8	0.69
284		PE 40:6; PE 18:0-22:6; [M-H]- C45H78NO8P---PE 40:6; [M-H]-; GPEtn(18:1(11E)/22:5(4Z,7Z,10Z,13Z,16Z)) C45H78NO8P---PE 40:6; [M-H]-; GPEtn(18:1(11E)/22:5(7Z,10Z,13Z,16Z,19Z)) C45H78NO8P---PE 40:6; [M-H]-; GPEtn(18:1(11Z)/22:5(4Z,7Z,10Z,13Z,16Z)) C45H78NO8P---PE 40:6; [M-H]-; GPEtn(18:1(11Z)/22:5(7Z,10Z,13Z,16Z,19Z)) C45H78NO8P---PE 40:6; [M-H]-; GPEtn(18:1(13Z)/22:5(4Z,7Z,10Z,13Z,16Z)) C45H78NO8P--…	M-H 1-	790.54	6565.4	5552.2	3945.2	6113	8118.6	2437.2	1996.3	11829.3	3999.5	3825.4	4.17	4.18	4.17	4.17	4.18	4.17	4.17	4.17	4.17	4.17	0.88	0.88	0.87	0.94	0.93	0.88	0.87	0.94	0.79	0.88
285		PC 34:1e; PC 16:1e/18:0; [M+FA-H]- C42H84NO7P	M+HCOO 1-	790.595			78.7					38.9					4.54					4.52					0.68					0.64
286		PC 34:1e; PC 18:1e/16:0; [M+FA-H]- C42H84NO7P	M+HCOO 1-	790.596	126.5	131.4	295.4	216.5	147.6	178.1	132	133.6	316.8	228	4.27	4.26	4.28	4.28	4.28	4.28	4.28	4.28	4.28	4.28	0.77	0.8	0.88	0.87	0.83	0.91	0.88	0.69	0.9	0.86
287		OxPE 38:6+3O(2Cyc); OxPE 18:1-20:5+3O(2Cyc); [M-H]- C43H74NO11P	M-H2O-H 1-	792.485				274.9										2.87										0.54
288		PE 40:5; PE 18:0-22:5; [M-H]- C45H80NO8P---PE 40:5; PE 20:1-20:4; [M-H]- C45H80NO8P	M-H 1-	792.551	2233	1713.1		2168.9	2416.9	1323	1208.7	3900.9	2441.7	1447.7	4.23	4.22		4.24	4.22	4.26	4.26	4.26	4.26	4.24	0.72	0.76		0.72	0.76	0.79	0.75	0.84	0.78	0.67
289		PC 34:0e; PC 18:0e/16:0; [M+FA-H]- C42H86NO7P	M+HCOO 1-	792.608	43.8	39.3	75.8	75.6		36	28.8	46.1	83.8	60.1	4.55	4.54	4.56	4.54		4.55	4.56	4.56	4.55	4.56	0.87	0.9	0.85	0.91		0.78	0.79	0.95	0.88	0.93
290		PEtOH 38:6; PEtOH 18:2-20:4; [M-H]- C43H73O8P	M+HCOO 1-	793.503						61										3.14										0.77
290		PG 38:6; PG 18:2-20:4; [M-H]- C44H75O10P	M-H 1-	793.502	65.3	62.9					47.7		88.2		3.14	3.14					3.14		3.13		0.8	0.77					0.81		0.81
291		1-Palmitoyl-2-docosahexaenoyl-sn-glycero-3-phospho-(1'-rac-glycerol) [M-H]- C44H75O10P NIST 1149747	M-H 1-	793.507	42.6										3.4										0.75
292	*	ISF of OxPE 38:6+2O; OxPE 16:0-22:6+2O ; [M-H]- C43H74NO10P	-	776.486										261										3										0.8
292	*	OxPE 38:6+2O; OxPE 16:0-22:6+2O ; [M-H]- C43H74NO10P	M-H 1-	794.499			948.8	243.1	1611.8,371.3			85.5		915.2			3.08	3.36	3.06,3.36			3.37		3			0.59	0.66	0.67,0.73			0.69		0.52
293		PC 40:9e; PC 20:5e/20:4; [M+FA-H]- C48H80NO7P	M-H2O-H 1-	794.559				457.9										4.11										0.59
293		PE 40:4; [M-H]-; GPEtn(20:0/20:4(5E,8E,11E,14E)) C45H82NO8P---PE 40:4; [M-H]-; GPEtn(20:0/20:4(5Z,8Z,11Z,14Z)) C45H82NO8P---PE 40:4; [M-H]-; GPEtn(20:0/20:4(7E,10E,13E,16E)) C45H82NO8P---PE 40:4; [M-H]-; GPEtn(20:4(5E,8E,11E,14E)/20:0) C45H82NO8P---PE 40:4; [M-H]-; GPEtn(20:4(5Z,8Z,11Z,14Z)/20:0) C45H82NO8P---PE 40:4; [M-H]-; GPEtn(20:4(7E,10E,13E,16E)/20:0) C45H82NO8P	M-H 1-	794.563		589.4	259.8		867.5							4.14	4.14		4.16							0.52	0.52		0.52
294		PE 40:4; PE 18:0-22:4; [M-H]- C45H82NO8P---PE 40:4; PE 20:0-20:4; [M-H]- C45H82NO8P	M-H 1-	794.569	1239.3	1026.2	894.2	1052	1462.1	618.8	545.6		1260.6		4.53	4.54	4.51	4.51	4.54	4.51	4.52		4.51		0.9	0.93	0.93	0.92	0.93	0.87	0.93		0.91
295		OxPG 38:4+1O; OxPG 18:1-20:3+1O; [M-H]- C44H79O11P	M-H2O-H 1-	795.516	119.4	82.4					64.4		141.8		3.34	3.33					3.33		3.32		0.77	0.93					0.85		0.83
296		OxPE 38:4+3O(2Cyc); OxPE 18:0-20:4+3O(2Cyc); [M-H]- C43H78NO11P	M-H2O-H 1-	796.511								447.1										2.73										0.57
297		OxPE 38:4+3O; OxPE 18:1-20:3+3O ; [M-H]- C43H78NO11P	M-H2O-H 1-	796.513		305										3.01										0.61
297		OxPE 38:4+2O(1Cyc); OxPE 18:1-20:3+2O(1Cyc); [M-H]- C43H76NO10P---OxPE 38:5+2O; OxPE 18:1-20:4+2O ; [M-H]- C43H76NO10P	M-H 1-	796.513			787.3	826.5	2076.5					1161.2			3.1	3.09	3.13					3.07			0.71	0.79	0.73					0.53
298		PS 37:4; PS 17:0-20:4; [M-H]- C43H76NO10P	M-H 1-	796.514	182.8										3.53										0.6
299		PE 40:3; [M-H]-; GPEtn(20:0/20:3(5Z,8Z,11Z)) C45H84NO8P---PE 40:3; [M-H]-; GPEtn(20:0/20:3(8Z,11Z,14Z)) C45H84NO8P---PE 40:3; [M-H]-; GPEtn(20:3(5Z,8Z,11Z)/20:0) C45H84NO8P---PE 40:3; [M-H]-; GPEtn(20:3(8Z,11Z,14Z)/20:0) C45H84NO8P	M-H 1-	796.585			31.7										4.28										0.6
300		Cer-ADS d48:0; Cer-ADS d29:0/19:0; [M-H]- C48H97NO4---Cer-NP t48:0; Cer-NP t20:0/28:0; [M-H]- C48H97NO4---Cer-NP t48:0; Cer-NP t22:0/26:0; [M-H]- C48H97NO4	M+HCOO 1-	796.74	28.1	26.2	27.1	34	24.9	30.3	32.8	28.3	25.3	29.7	6.07	6.08	6.06	6.07	6.08	6.06	6.07	6.06	6.05	6.08	0.75	0.76	0.7	0.75	0.66	0.74	0.61	0.76	0.76	0.67
301		1-Octadecanoyl-2-(5Z,8Z,11Z,14Z-eicosatetraenoyl)-sn-glycero-3-phospho-(1'-sn-glycerol) [M-H]- C44H79O10P NIST 1148600	M-H 1-	797.537	82.7										3.76										0.9
302		OxPE 38:3+2O(1Cyc); OxPE 18:0-20:3+2O(1Cyc); [M-H]- C43H78NO10P	M-H 1-	798.528				1872.8	3064.3			855						3.45	3.45			3.45						0.7	0.7			0.63
302		PC 34:4; PC 14:0-20:4; [M+FA-H]- C42H76NO8P---PC 34:4; PC 16:1-18:3; [M+FA-H]- C42H76NO8P	M+HCOO 1-	798.529	485.8	479.8	1809.5			411.1	338.9			1705.9	3.42	3.46	3.45			3.43	3.41			3.43	0.81	0.75	0.81			0.84	0.86			0.63
303		PE 40:2; PE 18:1-22:1; [M-H]- C45H86NO8P---PE 40:2; [M-H]-; GPEtn(18:1(11E)/22:1(13Z)) C45H86NO8P---PE 40:2; [M-H]-; GPEtn(18:1(11Z)/22:1(13Z)) C45H86NO8P---PE 40:2; [M-H]-; GPEtn(18:1(13Z)/22:1(13Z)) C45H86NO8P---PE 40:2; [M-H]-; GPEtn(18:1(17Z)/22:1(13Z)) C45H86NO8P---PE 40:2; [M-H]-; GPEtn(18:1(4E)/22:1(13Z)) C45H86NO8P---PE 40:2; [M-H]-; GPEtn(18:1(6Z)/22:1(13Z)) C45H86NO8P---PE 40:2; [M-H]-;…	M-H 1-	798.601	76.3	94.5			133.6			26.3		75.2	4.85	4.85			4.85			4.85		4.84	0.63	0.67			0.65			0.87		0.72
304		PC 34:3; PC 16:1-18:2; [M+FA-H]- C42H78NO8P	M+HCOO 1-	800.545	4475.8	3422.6	5921.8	3856.4	5943.7	4709.4	3948.1	1625.1	9298	4493.6	3.57	3.56	3.57	3.58	3.56	3.56	3.56	3.56	3.56	3.56	0.94	0.95	0.94	0.9	0.95	0.95	0.93	0.85	0.95	0.92
305		PE 40:1; PE 18:0-22:1; [M-H]- C45H88NO8P	M-H 1-	800.616	35.2	29.5	25.8		50.4					30.8	5.09	5.08	5.09		5.09					5.08	0.59	0.7	0.64		0.63					0.75
306		HexCer-NDS d38:1; HexCer-NDS d14:0/24:1; [M-H]- C44H85NO8---HexCer-NS d38:1; HexCer-NS d18:1/20:0; [M-H]- C44H85NO8---HexCer-NS d38:1; HexCer-NS d22:1/16:0; [M-H]- C44H85NO8	M+HCOO 1-	800.625	72.3	50.3	122.3	108.9	90.6	48.1	32.5	57.5	104.7	90.8	4.51	4.52	4.51	4.51	4.52	4.51	4.52	4.52	4.51	4.51	0.65	0.81	0.75	0.73	0.71	0.8	0.81	0.71	0.74	0.81
307		SM d38:2; SM d14:0/24:2; [M+FA-H]- C43H85N2O6P	M+HCOO 1-	801.611	60.4				29.5			41.1			4.06				4.07			4.07			0.92				0.84			0.9
308		OxPE 36:4+4O(2Cyc); OxPE 16:0-20:4+4O(2Cyc); [M-H]- C41H74NO12P	M-H 1-	802.489			645.2	912.5	1380.2					629.6			2.69	2.7	2.69					2.66			0.69	0.67	0.82					0.69
309		OxPE 40:7+2O; OxPE 18:1-22:6+2O ; [M-H]- C45H76NO10P	M-H2O-H 1-	802.507										18.2										3.45										0.64
310		PC 34:2; PC 16:0-18:2; [M+FA-H]- C42H80NO8P	M+HCOO 1-	802.561	31863	25190.2	31785.5	29673.6	43982	24923.4	21504	17486.5	39593.2	30145.6	3.83	3.82	3.81	3.81	3.82	3.81	3.81	3.81	3.81	3.81	0.96	0.95	0.94	0.94	0.95	0.95	0.95	0.95	0.95	0.95
311		plasmenyl-PE 42:6; [M-H]-; PE(P-20:0/22:6(4Z,7Z,10Z,13Z,16Z,19Z)) C47H82NO7P	M-H 1-	802.573	153.8	116.9	104.9		236.1	81.8	69.2	93.4	181.7	131.4	4.68	4.67	4.69		4.68	4.68	4.64	4.67	4.68	4.67	0.79	0.71	0.63		0.8	0.7	0.68	0.54	0.71	0.56
312		OxPC 36:1+1O; OxPC 18:0-18:1+1O; [M+FA-H]- C44H86NO9P	M-H 1-	802.597	136.1	30.8	86.7	79.5	192.9						2.23	2.24	2.24	2.25	2.24						0.55	0.52	0.55	0.55	0.54
313		SM d38:1; SM d14:0/24:1; [M+FA-H]- C43H87N2O6P---SM d38:1; SM d18:1/20:0; [M+FA-H]- C43H87N2O6P	M+HCOO 1-	803.628	771.2	388.3	595.2	577.4	710.8	271.8	240.1	499.7	582.7	560.5	4.33	4.35	4.34	4.34	4.35	4.34	4.34	4.35	4.34	4.34	0.96	0.96	0.97	0.96	0.96	0.96	0.96	0.97	0.96	0.96
314		OxPE 40:6+1O(1Cyc); OxPE 18:1-22:5+1O(1Cyc); [M-H]- C45H76NO9P	M-H 1-	804.518	78.6	168.5	214.1							264.6	3.07	3.39	3.08							3.39	0.79	0.65	0.6							0.58
314		OxPE 40:6+2O; OxPE 18:1-22:5+2O ; [M-H]- C45H78NO10P	M-H2O-H 1-	804.518					166.9										3.08										0.7
315		OxPE 40:7+1O; OxPE 18:1-22:6+1O ; [M-H]- C45H76NO9P	M-H 1-	804.517								520.8										3.26										0.66
316		OxPE 40:6+2O; OxPE 18:0-22:6+2O ; [M-H]- C45H78NO10P	M-H2O-H 1-	804.519								106.3										3.73										0.61
317		PC 34:1; PC 16:0-18:1; [M+FA-H]- C42H82NO8P	M+HCOO 1-	804.577	18261.2	17222.7	20615.8	26377.4	21504.1	14823.2	14293.3	11750.6	25894.9	17998.4	4.06	4.05	4.07	4.07	4.05	4.07	4.05	4.05	4.07	4.05	0.95	0.95	0.96	0.94	0.95	0.96	0.95	0.97	0.95	0.95
318		PC(16:0e/13-HODE) C42H82NO8P	M+HCOO 1-	804.584										128.5										4.71										0.53
319		PS 38:6; PS 16:0-22:6; [M-H]- C44H74NO10P	M-H 1-	806.498	413.9	453.9	366.7	339	474.7	563.3	408	24.6	572.9	353	3.36	3.37	3.36	3.36	3.36	3.37	3.37	3.38	3.37	3.37	0.84	0.87	0.83	0.81	0.8	0.82	0.82	0.57	0.81	0.79
320		OxPE 40:5+1O(1Cyc); OxPE 18:0-22:5+1O(1Cyc); [M-H]- C45H78NO9P	M-H 1-	806.532								851		138.3								3.64		3.62								0.82		0.54
321		PC 34:0; PC 16:0-18:0; [M+FA-H]- C42H84NO8P	M+HCOO 1-	806.592	644.1	517.6	907.2	619.6	723.2	432.7	368.4	1132.2	922.9	712.6	4.33	4.35	4.34	4.34	4.35	4.34	4.34	4.35	4.34	4.34	0.93	0.96	0.94	0.97	0.94	0.96	0.92	0.95	0.96	0.96
322		PS 38:5; PS 18:1-20:4; [M-H]- C44H76NO10P	M-H 1-	808.512			261	252.4		433.4	289		410				3.47	3.45		3.45	3.47		3.47				0.81	0.8		0.82	0.87		0.86
322		PS(18:0/20-HETE) C44H78NO11P	M-H2O-H 1-	808.511	224.4	233.6						19.3			3.47	3.46						3.49			0.86	0.77						0.69
323		PE 38:6; [M-H]-; GPEtn(18:2(2E,4E)/20:4(5E,8E,11E,14E)) C43H74NO8P---PE 38:6; [M-H]-; GPEtn(18:2(2E,4E)/20:4(5Z,8Z,11Z,14Z)) C43H74NO8P---PE 38:6; [M-H]-; GPEtn(18:2(2E,4E)/20:4(7E,10E,13E,16E)) C43H74NO8P---PE 38:6; [M-H]-; GPEtn(18:2(6Z,9Z)/20:4(5E,8E,11E,14E)) C43H74NO8P---PE 38:6; [M-H]-; GPEtn(18:2(6Z,9Z)/20:4(5Z,8Z,11Z,14Z)) C43H74NO8P---PE 38:6; [M-H]-; GPEtn(18:2(6Z,9Z)/20:4(7E,10E,13E,16…	M+HCOO 1-	808.51	245.6		193.7	185.7				82.1	267.2		3.97		3.98	3.98				3.98	3.98		0.57		0.53	0.51				0.55	0.57
324		PE 42:10; PE 20:4-22:6; [M-H]- C47H74NO8P---PE 42:10; [M-H]-; GPEtn(20:4(5E,8E,11E,14E)/22:6(4Z,7Z,10Z,13Z,16Z,19Z)) C47H74NO8P---PE 42:10; [M-H]-; GPEtn(20:4(5Z,8Z,11Z,14Z)/22:6(4Z,7Z,10Z,13Z,16Z,19Z)) C47H74NO8P---PE 42:10; [M-H]-; GPEtn(20:4(7E,10E,13E,16E)/22:6(4Z,7Z,10Z,13Z,16Z,19Z)) C47H74NO8P---PE 42:10; [M-H]-; GPEtn(22:6(4Z,7Z,10Z,13Z,16Z,19Z)/20:4(5E,8E,11E,14E)) C47H74NO8P---PE 42:10; …	M-H 1-	810.513	59.4				80.2	63.8			134.1		3.59				3.58	3.58			3.6		0.66				0.64	0.51			0.65
325		1-Octadecanoyl-2-(5Z,8Z,11Z,14Z-eicosatetraenoyl)-sn-glycero-3-phosphoserine [M-H]- C44H78NO10P NIST 1196937	M-H 1-	810.523				373.9				48.1						4.28				3.61						0.52				0.54
326		1-Octadecanoyl-2-(5Z,8Z,11Z,14Z-eicosatetraenoyl)-sn-glycero-3-phosphoserine [M-H]- C44H78NO10P NIST 1196935---1-Octadecanoyl-2-(5Z,8Z,11Z,14Z-eicosatetraenoyl)-sn-glycero-3-phosphoserine [M-H]- C44H78NO10P NIST 1196945---PS 38:4; PS 18:0-20:4; [M-H]- C44H78NO10P	M-H 1-	810.529		29.7	33		32.1	31.3			33.7			9.73	9.75		9.74	9.73			9.74			0.91	0.83		0.72	0.85			0.81
327		1-Octadecanoyl-2-(5Z,8Z,11Z,14Z-eicosatetraenoyl)-sn-glycero-3-phosphoserine [M-H]- C44H78NO10P NIST 1196936	M-H 1-	810.529	1506.2	1287.1	1647.9	39.5,1636.2	1398.7	1679.9	1006.3	351.4	1459.1	32.1,1098.4	3.74	3.74	3.73	9.75,3.73	3.73	3.75	3.75	3.75	3.73	9.75,3.75	0.94	0.93	0.93	0.86,0.94	0.94	0.94	0.94	0.91	0.94	0.91,0.93
328		PC 36:5e; PC 16:1e/20:4; [M+FA-H]- C44H80NO7P---PC 36:5e; PC 18:5e/18:0; [M+FA-H]- C44H80NO7P	M+HCOO 1-	810.563	119.8		70.4	41.2	68.8	35.6		137.5	95.6	36.9	3.95		3.96	3.94	3.95	3.94		3.94	3.94	3.94	0.73		0.59	0.57	0.56	0.57		0.8	0.64	0.51
329		PC 35:4; PC 15:0-20:4; [M+FA-H]- C43H78NO8P	M+HCOO 1-	812.54	451.9	333.8			502.8	694.7		252.5	626.9	518.2	3.76	3.76			3.71	3.75		3.77	3.69	3.73	0.89	0.8			0.87	0.94		0.76	0.91	0.88
330		PE 38:4; [M-H]-; GPEtn(18:1(11E)/20:3(5Z,8Z,11Z)) C43H78NO8P---PE 38:4; [M-H]-; GPEtn(18:1(11E)/20:3(8Z,11Z,14Z)) C43H78NO8P---PE 38:4; [M-H]-; GPEtn(18:1(11Z)/20:3(5Z,8Z,11Z)) C43H78NO8P---PE 38:4; [M-H]-; GPEtn(18:1(11Z)/20:3(8Z,11Z,14Z)) C43H78NO8P---PE 38:4; [M-H]-; GPEtn(18:1(13Z)/20:3(5Z,8Z,11Z)) C43H78NO8P---PE 38:4; [M-H]-; GPEtn(18:1(13Z)/20:3(8Z,11Z,14Z)) C43H78NO8P---PE 38:4; [M-H]-; G…	M+HCOO 1-	812.541	131.2										4.51										0.51
331		PC 36:4e; PC 16:0e/20:4; [M+FA-H]- C44H82NO7P	M+HCOO 1-	812.581	134.3	112.2	176.3	150.3	130.1	170	106.4		247.3	168.7	4	4.01	4	4	4.01	4	4		4	4	0.73	0.79	0.67	0.9	0.85	0.65	0.83		0.69	0.91
332		PC(14:0/11,12-EET) C42H76NO9P---PC(14:0/14,15-EET) C42H76NO9P	M+HCOO 1-	814.522		390		880.3						827.7		2.84		2.85						2.85		0.51		0.51						0.6
333		PE 42:8; PE 20:2-22:6; [M-H]- C47H78NO8P---PE 42:8; [M-H]-; GPEtn(20:2(11Z,14Z)/22:6(4Z,7Z,10Z,13Z,16Z,19Z)) C47H78NO8P---PE 42:8; [M-H]-; GPEtn(20:2(5Z,8Z)/22:6(4Z,7Z,10Z,13Z,16Z,19Z)) C47H78NO8P---PE 42:8; [M-H]-; GPEtn(22:6(4Z,7Z,10Z,13Z,16Z,19Z)/20:2(11Z,14Z)) C47H78NO8P---PE 42:8; [M-H]-; GPEtn(22:6(4Z,7Z,10Z,13Z,16Z,19Z)/20:2(5Z,8Z)) C47H78NO8P	M-H 1-	814.542	69.4					70.4	73.1		112.2	35	3.95					3.94	3.94		3.96	3.96	0.65					0.69	0.67		0.79	0.54
334		PC 35:3; PC 17:1-18:2; [M+FA-H]- C43H80NO8P	M+HCOO 1-	814.559	171.6	152.1	208.9	131.6	268.2	241.8	175.5	125.9	406.7	189.3	3.72	3.71	3.71	3.71	3.71	3.71	3.71	3.73	3.71	3.71	0.89	0.87	0.86	0.85	0.85	0.88	0.93	0.9	0.91	0.91
335		PC 36:3e; PC 18:1e/18:2; [M+FA-H]- C44H84NO7P	M+HCOO 1-	814.592		37				33.9			68.2			4.1				4.07			4.07			0.69				0.78			0.8
336		HexCer-NDS d39:1; HexCer-NDS d14:0/25:1; [M-H]- C45H87NO8---HexCer-NS d39:1; HexCer-NS d17:1/22:0; [M-H]- C45H87NO8---HexCer-NS d39:1; HexCer-NS d18:1/21:0; [M-H]- C45H87NO8	M+HCOO 1-	814.64	42.4	32.2	59.1	50.6	71.8				61.1	43.6	4.68	4.69	4.69	4.69	4.68				4.68	4.69	0.73	0.7	0.75	0.74	0.75				0.68	0.61
337		GlcADG 38:6; GlcADG 16:0-22:6; [M-H]- C47H76O11	M-H 1-	815.524		58.5		194.8	709.7	48.9				138.3		3.46		3.43	2.87	3.47				3.45		0.68		0.56	0.78	0.57				0.69
338		SM d39:2; SM d14:1/25:1; [M+FA-H]- C44H87N2O6P	M+HCOO 1-	815.627									25.8										4.19										0.93
339		OxPC 34:3+1O; OxPC 16:0-18:3+1O; [M+FA-H]- C42H78NO9P---PC(16:1/9-HODE) C42H78NO9P	M+HCOO 1-	816.538	286.6	484.1	838	718.7	1044.6	28	75.6	688.4	206.6	758.9	3.02	3.01	2.97	3	3	3	2.96	3.03	3.01	3	0.69	0.68	0.68	0.7	0.75	0.79	0.79	0.75	0.78	0.72
340		PE 42:7; PE 20:1-22:6; [M-H]- C47H80NO8P---PE 42:7; [M-H]-; GPEtn(20:1(11E)/22:6(4Z,7Z,10Z,13Z,16Z,19Z)) C47H80NO8P---PE 42:7; [M-H]-; GPEtn(20:1(11Z)/22:6(4Z,7Z,10Z,13Z,16Z,19Z)) C47H80NO8P---PE 42:7; [M-H]-; GPEtn(20:1(13E)/22:6(4Z,7Z,10Z,13Z,16Z,19Z)) C47H80NO8P---PE 42:7; [M-H]-; GPEtn(20:1(13Z)/22:6(4Z,7Z,10Z,13Z,16Z,19Z)) C47H80NO8P---PE 42:7; [M-H]-; GPEtn(22:6(4Z,7Z,10Z,13Z,16Z,19Z)/20:1(…	M-H 1-	816.555		112.3	110.7	111.2	143.1	155.2	118.1	81.7	267.1	99.3		4.2	4.19	4.19	4.2	4.19	4.2	4.2	4.19	4.19		0.7	0.66	0.74	0.78	0.8	0.77	0.56	0.84	0.76
341		PC 35:2; PC 17:0-18:2; [M+FA-H]- C43H82NO8P	M+HCOO 1-	816.576	846.8	570.9	769.7	563.3	1117.6	745.7	536.4	498.5	1256.4	751.5	3.97	3.99	3.98	3.98	3.99	3.98	3.98	3.98	3.98	3.98	0.89	0.91	0.88	0.89	0.95	0.91	0.8	0.88	0.85	0.84
342		PC 36:2e; PC 18:0e/18:2; [M+FA-H]- C44H86NO7P---PC 36:2e; PC 18:1e/18:1; [M+FA-H]- C44H86NO7P	M+HCOO 1-	816.612		61.4	199.4		183.1	52.6	34.9		187.5	158.4		4.37	4.41		4.41	4.36	4.55		4.4	4.41		0.83	0.82		0.89	0.69	0.8		0.88	0.8
343		PG 40:8; PG 18:2-22:6; [M-H]- C46H75O10P	M-H 1-	817.503	155.7	103.8	106.3	51.5	152.8	130.2	91		178.9	53	3.1	3.09	3.1	3.11	3.11	3.09	3.09		3.09	3.09	0.73	0.61	0.58	0.55	0.65	0.77	0.76		0.76	0.64
344		GlcADG 38:5; GlcADG 18:2-20:3; [M-H]- C47H78O11	M-H 1-	817.537									358.8										3.56										0.61
345		SM d39:1; SM d14:0/25:1; [M+FA-H]- C44H89N2O6P---SM d39:1; SM d17:1/22:0; [M+FA-H]- C44H89N2O6P---SM d39:1; SM d18:1/21:0; [M+FA-H]- C44H89N2O6P	M+HCOO 1-	817.642	398.4	330.2	383.6	348.1	617.4	194.4	128.6	165.6	436.4	331.6	4.51	4.52	4.51	4.51	4.52	4.51	4.52	4.52	4.51	4.51	0.96	0.96	0.95	0.95	0.96	0.97	0.96	0.96	0.96	0.96
346		PS 40:5; PS 18:1-22:4; [M-H]- C46H80NO10P	M-H2O-H 1-	818.535		67.6										4.39										0.55
347		OxPC 34:1+1O(1Cyc); OxPC 16:0-18:1+1O(1Cyc); [M+FA-H]- C42H80NO9P---PC(16:0/13-HODE) C42H80NO9P	M+HCOO 1-	818.554	389	670.4	956.6	936.2	1104.9	109.7	179.3	1022	332.5	879.5	2.97	2.97	2.97	2.94	2.97	2.99	3.02	3	2.96	2.98	0.9	0.97	0.89	0.96	0.9	0.92	0.89	0.89	0.92	0.92
348		PC 35:1; PC 17:0-18:1; [M+FA-H]- C43H84NO8P	M+HCOO 1-	818.591	232.9	224.2	229.3	212.6	253.2	250.3	194.1	260.7	387.7	231.1	4.21	4.22	4.21	4.21	4.22	4.21	4.22	4.22	4.21	4.22	0.83	0.81	0.8	0.8	0.82	0.81	0.73	0.81	0.83	0.72
349		PC 36:1e; PC 18:0e/18:1; [M+FA-H]- C44H88NO7P	M+HCOO 1-	818.628						21.7	20.3	31.6	52.5							4.58	4.6	4.63	4.6							0.84	0.74	0.73	0.79
350		PG 40:7; PG 18:1-22:6; [M-H]- C46H77O10P	M-H 1-	819.518	141.7	106.2	145.7	97.4	119.6	181	130		247.4		3.27	3.29	3.27	3.28	3.28	3.28	3.28		3.28		0.76	0.73	0.79	0.63	0.74	0.79	0.79		0.73
351		1-Linoleoyl-2-stearoyl-sn-glycero-3-phospho-(1'-sn-glycerol) [M-H]- C42H79O10P NIST 1035747---1-Stearoyl-2-linoleoyl-sn-glycero-3-phospho-(1'-rac-glycerol) [M-H]- C42H79O10P NIST 1149780	M+HCOO 1-	819.547				233.1			214.5							3.81			3.84							0.63			0.53
352		OxPE 40:7+2O; OxPE 18:1-22:6+2O ; [M-H]- C45H76NO10P	M-H 1-	820.515			428.5	392.4	548								3.06	2.76	3.08								0.54	0.64	0.66
353		PE 42:5; PE 22:1-20:4; [M-H]- C47H84NO8P---PE 42:5; [M-H]-; GPEtn(20:4(5E,8E,11E,14E)/22:1(13Z)) C47H84NO8P---PE 42:5; [M-H]-; GPEtn(20:4(5Z,8Z,11Z,14Z)/22:1(13Z)) C47H84NO8P---PE 42:5; [M-H]-; GPEtn(20:4(7E,10E,13E,16E)/22:1(13Z)) C47H84NO8P---PE 42:5; [M-H]-; GPEtn(22:1(13Z)/20:4(5E,8E,11E,14E)) C47H84NO8P---PE 42:5; [M-H]-; GPEtn(22:1(13Z)/20:4(5Z,8Z,11Z,14Z)) C47H84NO8P---PE 42:5; [M-H]-; GPE…	M-H 1-	820.59		128.2	145.3			77.6			153.4	131.7		4.56	4.58			4.55			4.55	4.56		0.51	0.51			0.52			0.65	0.65
354		PEtOH 40:6; PEtOH 18:2-22:4; [M-H]- C45H77O8P	M+HCOO 1-	821.529						167.1										3.43										0.67
354		PG 40:6; PG 18:1-22:5; [M-H]- C46H79O10P	M-H 1-	821.529							132.2										3.45										0.78
355		1-Octadecanoyl-2-(9Z-octadecenoyl)-sn-glycero-3-phospho-(1'-sn-glycerol) [M-H]- C42H81O10P NIST 1149764	M+HCOO 1-	821.566				318.2			263.1							4.09			4.09							0.52			0.51
356		PC 36:6; PC 14:0-22:6; [M+FA-H]- C44H76NO8P---PC 36:6; PC 16:1-20:5; [M+FA-H]- C44H76NO8P	M+HCOO 1-	822.529	400.1			736	1309.9	294.2	237.6			668.8	3.44			3.45	3.45	3.39	3.39			3.47	0.81			0.67	0.61	0.74	0.8			0.74
356		OxPE 40:6+2O; OxPE 18:0-22:6+2O ; [M-H]- C45H78NO10P---PS 39:5; PS 19:1-20:4; [M-H]- C45H78NO10P	M-H 1-	822.528			329.4					572					3.59					3.64					0.61					0.71
357	*	ISF of PE 42:4; PE 22:0-20:4; [M-H]- C47H86NO8P	-	754.575									82.1										4.77										0.79
357	*	PE 42:4; PE 22:0-20:4; [M-H]- C47H86NO8P	M-H 1-	822.599	71.9				51.4						4.9				4.92						0.93				0.84
358		PS 39:4; PS 19:0-20:4; [M-H]- C45H80NO10P	M-H 1-	824.545	382.4		541			1032.6					3.83		3.83			3.85					0.57		0.54			0.72
359		PC 36:5; PC 16:1-20:4; [M+FA-H]- C44H78NO8P---PC 36:5; PC 18:2-18:3; [M+FA-H]- C44H78NO8P	M+HCOO 1-	824.545	2525.1	1731.3	2788.9	2418.1	3362	2709.9	2370.4	1086.5	5621.3	2174	3.55	3.56	3.53	3.56	3.56	3.54	3.54	3.54	3.54	3.56	0.88	0.92	0.93	0.92	0.95	0.89	0.93	0.9	0.94	0.92
360		OxPE 38:6+4O; OxPE 16:0-22:6+4O ; [M-H]- C43H74NO12P	M-H 1-	826.488		251.8		1276.8	78.0,2223.2					971.7		2.54		2.65	3.17,2.67					2.64		0.68		0.5	0.59,0.65					0.59
361		PC 36:4; PC 16:0-20:4; [M+FA-H]- C44H80NO8P---PC 36:4; PC 18:2-18:2; [M+FA-H]- C44H80NO8P	M+HCOO 1-	826.561	16317.4	12666.5	20191.1	20350.5	20842.5	16763.4	14526	6413.5	26885	20957.2	3.79	3.8	3.79	3.79	3.78	3.79	3.79	3.79	3.79	3.79	0.94	0.94	0.94	0.94	0.94	0.94	0.93	0.94	0.94	0.94
362	*	ISF of OxPC 38:3+1O; OxPC 18:0-20:3+1O; [M+FA-H]- C46H86NO9P	-	303.233			10659.4		21932.6								2.2		2.2								0.64		0.67
362	*	OxPC 38:3+1O; OxPC 18:0-20:3+1O; [M+FA-H]- C46H86NO9P	M-H 1-	826.598	59.3		44.3	63.3	103.8						2.21		2.22	2.21	2.22						0.58		0.52	0.55	0.51
363		HexCer-NDS d40:2; HexCer-NDS d14:0/26:2; [M-H]- C46H87NO8---HexCer-NS d40:2; HexCer-NS d18:1/22:1; [M-H]- C46H87NO8---HexCer-NS d40:2; HexCer-NS d20:2/20:0; [M-H]- C46H87NO8	M+HCOO 1-	826.64	74.6	55.1	131.1	129.1	94	51.3	41.2		111.9	109.9	4.55	4.54	4.54	4.54	4.54	4.53	4.54		4.53	4.54	0.67	0.65	0.76	0.8	0.61	0.73	0.74		0.69	0.79
364		SM d40:3; SM d14:1/26:2; [M+FA-H]- C45H87N2O6P	M+HCOO 1-	827.628	51.1	28.9	46	39.5	54.8	36.2	35.2		62.6	54.7	4.1	4.09	4.11	4.09	4.09	4.11	4.09		4.09	4.09	0.84	0.85	0.81	0.91	0.84	0.87	0.83		0.81	0.88
365	*	ISF of OxPE 38:5+4O(1Cyc); OxPE 18:1-20:4+4O(1Cyc); [M-H]- C43H76NO12P---OxPE 38:5+4O(2Cyc); OxPE 18:1-20:4+4O(2Cyc); [M-H]- C43H76NO12P	-	810.493										661.5										2.74										0.87
365	*	OxPE 38:5+4O(1Cyc); OxPE 18:1-20:4+4O(1Cyc); [M-H]- C43H76NO12P---OxPE 38:5+4O(2Cyc); OxPE 18:1-20:4+4O(2Cyc); [M-H]- C43H76NO12P	M-H 1-	828.503			1076.7	1527.6						1294.6			2.71	2.72						2.74			0.67	0.63						0.63
366		PC 36:3; PC 16:0-20:3; [M+FA-H]- C44H82NO8P---PC 36:3; PC 18:1-18:2; [M+FA-H]- C44H82NO8P	M+HCOO 1-	828.575	12398.4	8838.2	15343.2	16448.2	15195.1	15514.7	13286.2	7711.3	24986.3	16633.1	3.89	3.88	3.87	3.9	3.88	3.88	3.88	3.88	3.88	3.88	0.9	0.95	0.89	0.92	0.96	0.91	0.96	0.94	0.97	0.96
367		PE 42:1; PE 24:0-18:1; [M-H]- C47H92NO8P	M-H 1-	828.648	23.1							31.2			5.39							5.4			0.83							0.89
368		HexCer-NS d40:1; HexCer-NS d18:1/22:0; [M-H]- C46H89NO8	M+HCOO 1-	828.657	547	492.5	886.2	889.1	993.2	285.8	213.7	133.2	636.3	696.7	4.83	4.85	4.84	4.84	4.85	4.83	4.84	4.84	4.83	4.84	0.83	0.78	0.82	0.82	0.8	0.79	0.78	0.74	0.82	0.78
369		SM d40:2; SM d14:0/26:2; [M+FA-H]- C45H89N2O6P---SM d40:2; SM d18:1/22:1; [M+FA-H]- C45H89N2O6P	M+HCOO 1-	829.644	801.5	810.9	881.3	945.9	1216.9	550.7	508.5	301.3	1134.1	1164.8	4.38	4.37	4.36	4.36	4.37	4.36	4.37	4.39	4.36	4.36	0.96	0.94	0.96	0.96	0.95	0.96	0.96	0.94	0.96	0.96
370	*	ISF of OxPE 38:4+4O(2Cyc); OxPE 18:0-20:4+4O(2Cyc); [M-H]- C43H78NO12P	-	812.508										1060.2										2.87										0.79
370	*	OxPE 38:4+4O(2Cyc); OxPE 18:0-20:4+4O(2Cyc); [M-H]- C43H78NO12P	M-H 1-	830.518			1687.3	2073				1331.4		1644.3			2.89	2.89				2.86		2.9			0.56	0.69				0.72		0.64
371		PC 36:2; PC 18:0-18:2; [M+FA-H]- C44H84NO8P	M+HCOO 1-	830.593	18743.9	15495	21267.4	21098.5	25673.5	13918.2	11993.3	8205.9	22152.5	17699.4	4.17	4.16	4.15	4.15	4.16	4.15	4.15	4.15	4.15	4.15	0.95	0.96	0.95	0.95	0.96	0.95	0.8	0.94	0.95	0.95
372		SM d40:1; SM d18:1/22:0; [M+FA-H]- C45H91N2O6P	M+HCOO 1-	831.66	4798.1	4709.9	4006.8	4283.2	8260.8	1901.3	1493.8	1405.6	3773.5	4749.6	4.68	4.67	4.69	4.69	4.68	4.68	4.67	4.67	4.68	4.67	0.96	0.96	0.96	0.96	0.96	0.97	0.97	0.96	0.96	0.96
373		PE 40:8; [M-H]-; GPEtn(20:4(5E,8E,11E,14E)/20:4(5E,8E,11E,14E)) C45H74NO8P---PE 40:8; [M-H]-; GPEtn(20:4(5E,8E,11E,14E)/20:4(5Z,8Z,11Z,14Z)) C45H74NO8P---PE 40:8; [M-H]-; GPEtn(20:4(5E,8E,11E,14E)/20:4(7E,10E,13E,16E)) C45H74NO8P---PE 40:8; [M-H]-; GPEtn(20:4(5Z,8Z,11Z,14Z)/20:4(5E,8E,11E,14E)) C45H74NO8P---PE 40:8; [M-H]-; GPEtn(20:4(5Z,8Z,11Z,14Z)/20:4(5Z,8Z,11Z,14Z)) C45H74NO8P---PE 40:8; [M-H…	M+HCOO 1-	832.511		273	321.4			376.1						3.97	3.96			3.96						0.56	0.59			0.6
374		PS 40:7; PS 18:1-22:6; [M-H]- C46H76NO10P	M-H 1-	832.514	89.1					203.9	168.1				3.44					3.41	3.41				0.78					0.85	0.78
375		PC 36:1; PC 18:0-18:1; [M+FA-H]- C44H86NO8P	M+HCOO 1-	832.608	3385.2	2734.7	4112.6	5896.9	4085.4	1912.5	1918.4	2949.1	3796.2	3493.7	4.4	4.39	4.41	4.41	4.39	4.38	4.39	4.39	4.38	4.39	0.94	0.93	0.94	0.95	0.93	0.93	0.93	0.94	0.93	0.94
376		PI 34:2; PI 16:0-18:2; [M-H]- C43H79O13P	M-H 1-	833.518	236.7	225	241.5	249.8	348.8			121.6		160.4	3.38	3.39	3.38	3.38	3.39			3.41		3.41	0.7	0.74	0.64	0.75	0.73			0.58		0.76
377		OxPE 40:7+4O; OxPE 18:1-22:6+4O ; [M-H]- C45H76NO12P	M-H2O-H 1-	834.489								555										2.51										0.53
378		1-Octadecanoyl-2-(4Z,7Z,10Z,13Z,16Z,19Z-docosahexaenoyl)-sn-glycero-3-phospho-L-serine [M-H]- C46H78NO10P NIST 1196955	M-H 1-	834.529	1223.8	1088	882.6	924.8	1068.2	1180.4	815.1	825.3	1120.2	738.4	3.68	3.67	3.68	3.66	3.67	3.66	3.69	3.68	3.69	3.69	0.92	0.92	0.89	0.91	0.93	0.89	0.93	0.92	0.92	0.92
379		OxPC 34:2+2O; OxPC 16:0-18:2+2O; [M+FA-H]- C42H80NO10P	M+HCOO 1-	834.549	497.9	384.6,168.0	2096.0,371.8	1816.2,706.9	3657.5,752.7	38.2	57.3	1844.7	271.5	1853.0,854.4	2.78	2.71,2.97	2.95,2.80	2.96,2.70	2.95,2.80	2.69	2.7	2.94	2.71	2.96,2.70	0.73	0.75,0.76	0.75,0.79	0.78,0.80	0.79,0.80	0.77	0.69	0.77	0.76	0.76,0.76
380		PC 38:7e; PC 16:1e/22:6; [M+FA-H]- C46H80NO7P	M+HCOO 1-	834.564								469.2										3.88										0.84
381		OxPE 40:6+4O; OxPE 18:0-22:6+4O ; [M-H]- C45H78NO12P	M-H2O-H 1-	836.507								1340.9										2.83										0.67
382		OxPS 36:1+3O; OxPS 18:0-18:1+3O; [M-H]- C42H80NO13P	M-H 1-	836.53		39.6										3.99										0.63
383	*	ISF of PS 40:5; PS 18:0-22:5; [M-H]- C46H80NO10P	-	749.512		352.1										3.69										0.8
383	*	PC 37:6; PC 15:0-22:6; [M+FA-H]- C45H78NO8P	M+HCOO 1-	836.541	549.1				650.9	590.9	534.3	503	740.8	426.2	3.7				3.69	3.71	3.75	3.71	3.69	3.69	0.76				0.86	0.85	0.84	0.8	0.87	0.85
383	*	PS 40:5; PS 18:0-22:5; [M-H]- C46H80NO10P	M-H 1-	836.54		470.2										3.69										0.57
384		PC 38:6e; PC 16:0e/22:6; [M+FA-H]- C46H82NO7P---PC 38:6e; PC 16:1e/22:5; [M+FA-H]- C46H82NO7P	M+HCOO 1-	836.576	43.2		53.1					273.5	45.8	38.9	3.95		3.96					3.96	3.96	3.96	0.55		0.62					0.79	0.51	0.52
385		PI 34:0; PI 16:0-18:0; [M-H]- C43H83O13P	M-H 1-	837.548								127.3										3.88										0.52
386	*	ISF of OxPE 40:6+3O; OxPE 18:0-22:6+3O ; [M-H]- C45H78NO11P	-	820.522					124.3										2.84										0.61
386	*	OxPE 40:6+3O; OxPE 18:0-22:6+3O ; [M-H]- C45H78NO11P	M-H 1-	838.523			317.6		450.1			1308.1					2.86		2.84			2.86					0.6		0.57			0.7
387		PC(16:1/8,9-EpETE) C44H76NO9P	M+HCOO 1-	838.523					87.7				75.4						3.43				3.45						0.57				0.55
388		PC 37:5; PC 17:1-20:4; [M+FA-H]- C45H80NO8P	M+HCOO 1-	838.558	157.1		337.4		353.5	185.5	264.3	306.6	336.9	241.9	3.68		3.79		3.78	3.69	3.77	3.85	3.69	3.75	0.77		0.79		0.83	0.86	0.82	0.52	0.88	0.84
389		PS 40:4; PS 18:0-22:4; [M-H]- C46H82NO10P	M-H 1-	838.559	173.1	286.8		292.3		123.1			95.5		3.97	3.84		3.77		3.97			3.96		0.87	0.81		0.88		0.82			0.67
390		PC 38:5e; PC 16:1e/22:4; [M+FA-H]- C46H84NO7P---PC 38:5e; PC 18:1e/20:4; [M+FA-H]- C46H84NO7P	M+HCOO 1-	838.596	103	22.2	128.9	111.7	96.9	187	125.1	99.4	283.3	134.6	4.04	4.31	4.04	4.05	4.03	4.05	4.05	4.09	4.05	4.05	0.67	0.84	0.87	0.81	0.81	0.88	0.86	0.75	0.92	0.91
391		OxPE 38:6+2O; OxPE 16:0-22:6+2O ; [M-H]- C43H74NO10P	M+HCOO 1-	840.512								95.7										2.66										0.53
392		OxPC 36:4+1O(1Cyc); OxPC 16:0-20:4+1O(1Cyc); [M+FA-H]- C44H78NO9P---OxPC 36:5+1O; OxPC 16:0-20:5+1O; [M+FA-H]- C44H78NO9P---PC(16:0/5-HEPE) C44H78NO9P---PC(16:0/8-HEPE) C44H78NO9P---PC(16:1/8-HETE) C44H78NO9P	M+HCOO 1-	840.537	199.7	315.8	494.5	470.9	532.6			739	204.5	540.5	2.97	2.94	2.95	2.94	2.95			2.92	2.92	2.9	0.74	0.71	0.75	0.72	0.53			0.64	0.86	0.65
393		PC 37:4; PC 17:0-20:4; [M+FA-H]- C45H82NO8P	M+HCOO 1-	840.576	537.6	319.3	479.3	380.8	637.3	452.4	330.2	235.4	783	501.7	3.95	3.97	3.96	3.96	3.97	3.96	3.96	3.96	3.96	3.96	0.91	0.9	0.94	0.91	0.92	0.94	0.93	0.9	0.91	0.9
394		PC 38:4e; PC 16:0e/22:4; [M+FA-H]- C46H86NO7P---PC 38:4e; PC 18:0e/20:4; [M+FA-H]- C46H86NO7P	M+HCOO 1-	840.611	73.9		130.2	91.1	112.9	97			177.1	121	4.33		4.34	4.34	4.35	4.34			4.34	4.34	0.93		0.77	0.81	0.6	0.85			0.9	0.89
395		HexCer-NDS d41:2; HexCer-NDS d15:0/26:2; [M-H]- C47H89NO8	M+HCOO 1-	840.655			40.4			21.8		17	53.7	24.2			4.69			4.72		4.76	4.68	4.69			0.76			0.74		0.55	0.7	0.69
396		PG 42:10; PG 20:4-22:6; [M-H]- C48H75O10P	M-H 1-	841.503	42.2					48.7	31		60.1		3.06					3.07	3.06		3.07		0.65					0.6	0.72		0.7
397		OxPS 38:4+2O; OxPS 18:1-20:3+2O; [M-H]- C44H78NO12P	M-H 1-	842.52							43.9										3.47										0.54
398		OxPC 36:3+1O(1Cyc); OxPC 16:0-20:3+1O(1Cyc); [M+FA-H]- C44H80NO9P---OxPC 36:4+1O; OxPC 16:0-20:4+1O; [M+FA-H]- C44H80NO9P---OxPC 36:4+1O; OxPC 18:1-18:3+1O; [M+FA-H]- C44H80NO9P	M+HCOO 1-	842.554	501.7	719.2	1199.7	1179.6	1254.9	151.8	208.9	1088.8	685.7	1397.4	3.08	3.05	3.08	3.11	3.13	3.16	3.09	3	3.11	3.11	0.79	0.78	0.8	0.8	0.8	0.87	0.75	0.69	0.81	0.85
399		PC 37:3; PC 17:0-20:3; [M+FA-H]- C45H84NO8P---PC 37:3; PC 19:1-18:2; [M+FA-H]- C45H84NO8P	M+HCOO 1-	842.588	236.7	168.3	237	207.3			188.8		425.1		4.02	4.03	4.02	4.02			4.03		4.02		0.77	0.77	0.78	0.79			0.8		0.84
400		HexCer-NDS d41:1; HexCer-NDS d14:0/27:1; [M-H]- C47H91NO8---HexCer-NS d41:1; HexCer-NS d18:1/23:0; [M-H]- C47H91NO8	M+HCOO 1-	842.673	161.7	137.2	228.4	206.8	220.8	160.5	90.7	108.6	370.5	197.2	4.98	5	4.99	4.99	4.98	4.98	4.99	4.99	4.98	4.99	0.8	0.79	0.8	0.83	0.79	0.75	0.8	0.75	0.78	0.82
401		1-Octadecanoyl-2-(5Z,8Z,11Z,14Z-eicosatetraenoyl)-sn-glycero-3-phospho-(1'-sn-glycerol) [M-H]- C44H79O10P NIST 1148589	M+HCOO 1-	843.547			242.8										3.73										0.53
402		SM d41:2; SM d14:1/27:1; [M+FA-H]- C46H91N2O6P---SM d41:2; SM d17:1/24:1; [M+FA-H]- C46H91N2O6P	M+HCOO 1-	843.658	445.2	363.8	516.9	359.5	553.3	417.7	309	261.1	916.5	447	4.53	4.54	4.54	4.54	4.54	4.53	4.54	4.56	4.53	4.54	0.94	0.94	0.94	0.94	0.96	0.95	0.93	0.95	0.96	0.95
403		OxPC 36:2+1O(1Cyc); OxPC 18:1-18:1+1O(1Cyc); [M+FA-H]- C44H82NO9P---OxPC 36:3+1O; OxPC 16:0-20:3+1O; [M+FA-H]- C44H82NO9P---OxPC 36:3+1O; OxPC 18:0-18:3+1O; [M+FA-H]- C44H82NO9P---PC(18:1/9-HODE) C44H82NO9P	M+HCOO 1-	844.567		502.3	840.9	857.1	908.4	45.5	140.8	783.9		917.4		3.16	3.17	3.17	3.08	3.01	3.04	3.15		3.13		0.89	0.75	0.84	0.71	0.87	0.75	0.71		0.86
404		PC 37:2; PC 19:0-18:2; [M+FA-H]- C45H86NO8P	M+HCOO 1-	844.607	510.6	413	479.4	319.5	770.2	455.9	334.3	291.2	885.5	495	4.31	4.33	4.32	4.32	4.33	4.32	4.32	4.32	4.32	4.32	0.91	0.92	0.88	0.89	0.93	0.87	0.9	0.87	0.92	0.9
405		PEtOH 42:8; PEtOH 20:4-22:4; [M-H]- C47H77O8P	M+HCOO 1-	845.542									47.1										3.35										0.53
406		SM d41:1; SM d14:0/27:1; [M+FA-H]- C46H93N2O6P---SM d41:1; SM d18:1/23:0; [M+FA-H]- C46H93N2O6P	M+HCOO 1-	845.673	2011.2	1803.9	2122.1	1985.7	3120.8	1362.5	1027	1007.9	3072.4	1908.3	4.83	4.82	4.84	4.84	4.83	4.83	4.84	4.84	4.83	4.84	0.95	0.95	0.94	0.94	0.95	0.95	0.96	0.95	0.95	0.94
407		OxPC 36:1+1O(1Cyc); OxPC 18:0-18:1+1O(1Cyc); [M+FA-H]- C44H84NO9P---OxPC 36:2+1O; OxPC 18:0-18:2+1O; [M+FA-H]- C44H84NO9P	M+HCOO 1-	846.584	176.1	250.9	476.3	505.3	535.5	25.9		424.5	143.4	376.9	3.25	3.26	3.25	3.26	3.26	3.23		3.2	3.2	3.26	0.9	0.89	0.83	0.84	0.86	0.82		0.87	0.74	0.83
408		PC 37:1; PC 19:0-18:1; [M+FA-H]- C45H88NO8P	M+HCOO 1-	846.621	187	72.5	94.7	151.6	126.1	27.1	111.8	157.6	318.5	179.2	4.42	4.56	4.54	4.51	4.58	4.34	4.37	4.5	4.43	4.43	0.77	0.82	0.81	0.74	0.79	0.55	0.75	0.87	0.79	0.75
409		SM d41:0; SM d14:0/27:0; [M+FA-H]- C46H95N2O6P	M+HCOO 1-	847.688								31.7		77.7								4.95		4.97								0.85		0.88
410		PC 38:7; PC 16:1-22:6; [M+FA-H]- C46H78NO8P---PC 38:7; PC 18:3-20:4; [M+FA-H]- C46H78NO8P	M+HCOO 1-	848.545	900.8	541.1	999.4	608.1	1021.7	972	842.7	326.8	2091.3	697.2	3.47	3.46	3.47	3.47	3.45	3.45	3.45	3.47	3.45	3.47	0.91	0.75	0.91	0.86	0.88	0.9	0.92	0.84	0.88	0.91
411		PS 41:6; PS 19:0-22:6; [M-H]- C47H80NO10P	M-H 1-	848.545									578.5										3.73										0.67
412		PC 38:6; PC 16:0-22:6; [M+FA-H]- C46H80NO8P---PC 38:6; PC 18:2-20:4; [M+FA-H]- C46H80NO8P	M+HCOO 1-	850.561	13766.7	11566	13364.2	12930.2	17141.5	10492.6	9476.2	9919.8,579.5	15954.5	13251.6	3.72	3.74	3.73	3.73	3.73	3.73	3.73	3.73,3.58	3.73	3.73	0.91	0.9	0.91	0.9	0.91	0.9	0.91	0.90,0.94	0.91	0.9
413		OxPE 40:7+4O; OxPE 18:1-22:6+4O ; [M-H]- C45H76NO12P	M-H 1-	852.505			354.7										2.8										0.51
414		OxPC 34:1+3O; OxPC 16:0-18:1+3O; [M+FA-H]- C42H82NO11P	M+HCOO 1-	852.56	32	44.7	76.3	99.4	101.5			40.2	27.3	96.2	2.34	2.35	2.34	2.33	2.35			2.34	2.35	2.34	0.75	0.73	0.73	0.72	0.74			0.64	0.77	0.75
415		PC 38:5; PC 18:1-20:4; [M+FA-H]- C46H82NO8P	M+HCOO 1-	852.573	6538.7	4512.5	6312.2	6678	6834.8	8221.4	7143.5		12152.4	6668.3	3.81	3.8	3.81	3.81	3.8	3.83	3.84		3.84	3.81	0.86	0.85	0.93	0.86	0.88	0.93	0.91		0.91	0.9
416		HexCer-NS d42:3; HexCer-NS d14:1/28:2; [M-H]- C48H89NO8---HexCer-NS d42:3; HexCer-NS d18:1/24:2; [M-H]- C48H89NO8---HexCer-NS d42:3; HexCer-NS d18:2/24:1; [M-H]- C48H89NO8---HexCer-NS d42:3; HexCer-NS d20:2/22:1; [M-H]- C48H89NO8	M+HCOO 1-	852.656	46.4	30.6	63.1	61.2	52.9	44.5	31.9	65.9	102.7	48.4	4.61	4.59	4.6	4.6	4.61	4.6	4.6	4.58	4.6	4.6	0.6	0.65	0.75	0.81	0.61	0.69	0.66	0.77	0.77	0.7
417		PC 38:4; PC 18:0-20:4; [M+FA-H]- C46H84NO8P---PC 38:4; PC 18:1-20:3; [M+FA-H]- C46H84NO8P	M+HCOO 1-	854.593	13075.6	8599.2	13459.5	14972.4	1324.7,15438.2	8653.6	7323.1	4713.4	13253.6	12615.2	4.12	4.14	4.13	4.13	3.84,4.14	4.13	4.13	4.13	4.13	4.13	0.94	0.94	0.95	0.94	0.91,0.94	0.95	0.94	0.94	0.94	0.94
418		HexCer-NS d42:2; HexCer-NS d18:1/24:1; [M-H]- C48H91NO8---HexCer-NS d42:2; HexCer-NS d20:2/22:0; [M-H]- C48H91NO8	M+HCOO 1-	854.673	325	311.4	624.8	556.1	451.2	318.7	249.9	257.2	732.4	457.9	4.83	4.85	4.84	4.84	4.85	4.83	4.84	4.84	4.83	4.84	0.8	0.79	0.79	0.83	0.78	0.78	0.78	0.82	0.83	0.84
419		SM d42:3; SM d14:1/28:2; [M+FA-H]- C47H91N2O6P---SM d42:3; SM d18:1/24:2; [M+FA-H]- C47H91N2O6P	M+HCOO 1-	855.659	766.5	537.3	714	547.2	773	774	630.2	668.5	1529.9	796.2	4.42	4.41	4.43	4.43	4.41	4.43	4.43	4.43	4.43	4.43	0.95	0.95	0.95	0.95	0.95	0.96	0.96	0.96	0.96	0.95
420		OxPC 36:5+2O; OxPC 16:0-20:5+2O; [M+FA-H]- C44H78NO10P	M+HCOO 1-	856.532		224							130.1			2.73							2.77			0.52							0.56
421		PC 38:3; PC 18:0-20:3; [M+FA-H]- C46H86NO8P---PC 38:3; PC 20:1-18:2; [M+FA-H]- C46H86NO8P	M+HCOO 1-	856.604	5305.4		5604.1			3583.4	3458.8		6427.9	5630.6	4.21		4.21			4.19	4.2		4.21	4.22	0.95		0.95			0.95	0.93		0.88	0.95
422		HexCer-NDS d42:1; HexCer-NDS d14:0/28:1; [M-H]- C48H93NO8---HexCer-NS d42:1; HexCer-NS d18:1/24:0; [M-H]- C48H93NO8	M+HCOO 1-	856.689	289.6	318.4	441	431.7	407.8	260.3	179	394.6	604.9	372	5.13	5.15	5.14	5.14	5.13	5.13	5.14	5.12	5.13	5.14	0.82	0.86	0.83	0.82	0.81	0.79	0.83	0.78	0.8	0.83
423		PI 36:4; PI 16:0-20:4; [M-H]- C45H79O13P---PI 36:4; PI 18:2-18:2; [M-H]- C45H79O13P	M-H 1-	857.519	548.1	444.9	573.8	969.6	665.2	428.1	377.2	121.9	739.6	382.1	3.38	3.37	3.38	3.36	3.39	3.37	3.37	3.37	3.37	3.39	0.84	0.77	0.78	0.77	0.77	0.7	0.71	0.76	0.82	0.72
424		SM d42:2; SM d14:0/28:2; [M+FA-H]- C47H93N2O6P---SM d42:2; SM d18:1/24:1; [M+FA-H]- C47H93N2O6P	M+HCOO 1-	857.676	4943.8	4460.9	5363	4277.7	6063.6	4554.3	3665.2	2761.1	9140.5	5220.6	4.68	4.67	4.69	4.69	4.68	4.68	4.67	4.67	4.68	4.67	0.96	0.96	0.96	0.96	0.95	0.96	0.96	0.96	0.96	0.96
425		OxPC 36:3+2O(1Cyc); OxPC 16:0-20:3+2O(1Cyc); [M+FA-H]- C44H80NO10P	M+HCOO 1-	858.549	338.2	414.2	1119.4	2389.2			38.5	879.1	417	2116.8	2.85	2.84	3.02	3.11			2.79	3.02	2.84	3.02	0.7	0.7	0.81	0.82			0.85	0.78	0.69	0.86
426		OxPC 36:4+2O; OxPC 16:0-20:4+2O; [M+FA-H]- C44H80NO10P	M+HCOO 1-	858.55			649.3		3168.2			484.6					3.27		3.06			3.28					0.8		0.77			0.78
427		PC 38:2; PC 18:0-20:2; [M+FA-H]- C46H88NO8P---PC 38:2; PC 20:0-18:2; [M+FA-H]- C46H88NO8P	M+HCOO 1-	858.623	1300	1304.3	1251.2	1353.4	2229.1	797.8	730.9	491.1	1652.8	1309	4.49	4.48	4.47	4.47	4.48	4.47	4.47	4.45	4.47	4.47	0.92	0.87	0.8	0.83	0.92	0.78	0.83	0.83	0.78	0.85
428		PI 36:3; PI 16:0-20:3; [M-H]- C45H81O13P---PI 36:3; PI 18:1-18:2; [M-H]- C45H81O13P	M-H 1-	859.532		277.5	405.7	370.6			314.5	202.8	672.2	324.5		3.46	3.45	3.45			3.45	3.45	3.45	3.45		0.73	0.55	0.61			0.55	0.72	0.59	0.64
429		SM d42:1; SM d14:0/28:1; [M+FA-H]- C47H95N2O6P---SM d42:1; SM d18:1/24:0; [M+FA-H]- C47H95N2O6P	M+HCOO 1-	859.692	3465.8	3654.7	2929.7	2884.4	4953.5	2031.8		1351.4	4548.2	3285.1	4.98	5	4.99	4.99	4.98	4.98		4.99	4.98	4.99	0.96	0.96	0.96	0.95	0.95	0.95		0.95	0.96	0.95
430		OxPC 36:3+2O; OxPC 18:1-18:2+2O; [M+FA-H]- C44H82NO10P	M+HCOO 1-	860.564	321.3		1150	1219.6	1563.4			1370.6	365.8	1259.4	2.93		3.02	3.02	3.02			3	2.81	3	0.79		0.84	0.81	0.81			0.81	0.78	0.8
431		PC 40:8e; PC 18:2e/22:6; [M+FA-H]- C48H82NO7P	M+HCOO 1-	860.574								76.6										3.96										0.81
432		PC 38:1; PC 18:0-20:1; [M+FA-H]- C46H90NO8P---PC 38:1; PC 20:0-18:1; [M+FA-H]- C46H90NO8P	M+HCOO 1-	860.634	275.1	278.3	215	270.6	587.9	186.7		258.3	163.9	239.2	4.55	4.56	4.54	4.71	4.59	4.53		4.71	4.71	4.56	0.63	0.58	0.65	0.66	0.67	0.56		0.71	0.57	0.65
433		1,2-Di-(9Z-octadecenoyl)-sn-glycero-3-phospho-(1'-myo-inositol) [M-H]- C45H83O13P NIST 1149971	M-H 1-	861.538								767.8										3.64										0.68
434		PI 36:2; PI 18:0-18:2; [M-H]- C45H83O13P	M-H 1-	861.55	410.4	304	354.8		482.2	366.3	289.3	661.9	697.3	208.3	3.7	3.71	3.71		3.71	3.71	3.71	3.71	3.71	3.71	0.66	0.66	0.68		0.69	0.77	0.67	0.76	0.73	0.69
435		PC 39:7; PC 17:1-22:6; [M+FA-H]- C47H80NO8P	M+HCOO 1-	862.556						279.8			535.7							3.69			3.69							0.75			0.81
436		OxPC 36:2+2O; OxPC 18:0-18:2+2O; [M+FA-H]- C44H84NO10P	M+HCOO 1-	862.581	85	73.3	1003.6	928.4	1656.8			658.9	41.6	700.2	3.23	3.23	3.23	3.24	3.23			3.24	3.22	3.24	0.78	0.81	0.77	0.74	0.76			0.77	0.73	0.75
437		PC 40:7e; PC 18:1e/22:6; [M+FA-H]- C48H84NO7P	M+HCOO 1-	862.597		28			78			66		25.9		4.22			4.2			4.22		4.23		0.74			0.62			0.83		0.73
438		PC(18:2/14,15-EpETE) C46H78NO9P	M+HCOO 1-	864.534			131.2					203.9					3.45					2.83					0.53					0.57
439		PC 39:6; PC 17:0-22:6; [M+FA-H]- C47H82NO8P	M+HCOO 1-	864.576	231.2	185.9	199.4	141.6	298	160	132.5	321.5	259.6	187.1	3.89	3.9	3.9	3.9	3.88	3.9	3.88	3.9	3.9	3.88	0.84	0.77	0.85	0.8	0.88	0.86	0.82	0.92	0.86	0.84
440		PC 40:6e; PC 18:0e/22:6; [M+FA-H]- C48H86NO7P---PC 40:6e; PC 18:1e/22:5; [M+FA-H]- C48H86NO7P	M+HCOO 1-	864.612		30.1	67.8				22.4	63.5	63.7			4.3	4.28				4.3	4.26	4.28			0.63	0.64				0.6	0.72	0.69
441		PG 44:12; PG 22:6-22:6; [M-H]- C50H75O10P	M-H 1-	865.503	112.2					130.1	74.6				3.04					3.03	3.02				0.77					0.73	0.84
442		PC(16:0/7-HDoHE) C46H80NO9P	M+HCOO 1-	866.552										167.5										2.77										0.62
443		OxPC 38:5+1O(1Cyc); OxPC 16:0-22:5+1O(1Cyc); [M+FA-H]- C46H80NO9P---OxPC 38:6+1O; OxPC 16:0-22:6+1O; [M+FA-H]- C46H80NO9P---PC(18:1/8,9-EpETE) C46H80NO9P	M+HCOO 1-	866.554	235	573.7	896.5	727.1	899.2		212.4	901.3	538.9	474.7	2.93	3.09	3.17	3.15	3.11		3.11	3.13	3.09	3.06	0.73	0.84	0.84	0.79	0.83		0.83	0.84	0.8	0.76
444		PC 39:5; PC 17:0-22:5; [M+FA-H]- C47H84NO8P---PC 39:5; PC 19:1-20:4; [M+FA-H]- C47H84NO8P	M+HCOO 1-	866.589			75		130.4	115			190.2				3.98		3.97	3.98			4				0.77		0.79	0.88			0.83
445		PG 44:11; PG 22:5-22:6; [M-H]- C50H77O10P	M-H 1-	867.519						67.4	46.9		84.9							3.18	3.2		3.2							0.74	0.63		0.65
446		OxPC 38:4+1O(1Cyc); OxPC 18:1-20:3+1O(1Cyc); [M+FA-H]- C46H82NO9P---PC(18:0/8,9-EpETE) C46H82NO9P	M+HCOO 1-	868.568	234	325	540.1	513.8	536.9	54.6	136	462		661.6	3.16	3.14	3.1	3.19	3.17	3.22	3.13	3.2		3.15	0.76	0.82	0.83	0.8	0.76	0.76	0.82	0.79		0.89
447		PC 39:4; PC 19:0-20:4; [M+FA-H]- C47H86NO8P	M+HCOO 1-	868.607	287.5	202.7	262.3	196.9	369.1	235.6	176.2	140.7	438	262.8	4.29	4.31	4.3	4.3	4.31	4.3	4.3	4.3	4.3	4.3	0.92	0.91	0.88	0.88	0.92	0.85	0.79	0.92	0.88	0.86
448		OxPC 38:3+1O(1Cyc); OxPC 18:0-20:3+1O(1Cyc); [M+FA-H]- C46H84NO9P---OxPC 38:4+1O; OxPC 18:0-20:4+1O; [M+FA-H]- C46H84NO9P	M+HCOO 1-	870.585	276.2	169.6	587.4	349.3	544.6			339.5		596.9	3.32	3.41	3.42	3.49	3.47			3.41		3.32	0.9	0.91	0.83	0.89	0.88			0.84		0.8
449		PC 39:3; PC 19:0-20:3; [M+FA-H]- C47H88NO8P	M+HCOO 1-	870.618	122	117.8	103.6		194.8		60.2				4.36	4.39	4.36		4.37		4.41				0.79	0.88	0.72		0.92		0.85
450		HexCer-NDS d43:1; HexCer-NDS d14:0/29:1; [M-H]- C49H95NO8---HexCer-NS d43:1; HexCer-NS d18:1/25:0; [M-H]- C49H95NO8	M+HCOO 1-	870.704	13.3	16.2	22		19.1				37		5.3	5.3	5.27		5.26				5.26		0.65	0.64	0.75		0.77				0.75
451		PI 37:4; PI 17:0-20:4; [M-H]- C46H81O13P---PI 37:4; [M-H]-; GPIns(17:0/20:4(5E,8E,11E,14E)) C46H81O13P---PI 37:4; [M-H]-; GPIns(17:0/20:4(5Z,8Z,11Z,14Z)) C46H81O13P---PI 37:4; [M-H]-; GPIns(17:0/20:4(7E,10E,13E,16E)) C46H81O13P---PI 37:4; [M-H]-; GPIns(20:4(5E,8E,11E,14E)/17:0) C46H81O13P---PI 37:4; [M-H]-; GPIns(20:4(5Z,8Z,11Z,14Z)/17:0) C46H81O13P---PI 37:4; [M-H]-; GPIns(20:4(7E,10E,13E,16E)/1…	M-H 1-	871.537	60.8				65.7	58.1	40.1		112.6		3.53				3.55	3.52	3.54		3.54		0.51				0.52	0.68	0.65		0.61
452		OxPC 36:5+3O(2Cyc); OxPC 16:0-20:5+3O(2Cyc); [M+FA-H]- C44H78NO11P---OxPC 36:5+3O; OxPC 16:0-20:5+3O; [M+FA-H]- C44H78NO11P---PS(18:0/20-HETE) C44H78NO11P	M+HCOO 1-	872.529		387.5	790.9	927.2	1025.6			1475.5	168.4	812.6		2.58	2.56	2.57	2.52			2.56	2.67	2.59		0.66	0.78	0.7	0.73			0.67	0.8	0.76
453		PC 40:9; PC 18:3-22:6; [M+FA-H]- C48H78NO8P---PC 40:9; PC 20:4-20:5; [M+FA-H]- C48H78NO8P	M+HCOO 1-	872.544	41.9	29.7			47.6	71.3	40.8	84.5	182.2		3.34	3.35			3.36	3.37	3.35	3.3	3.39		0.6	0.53			0.59	0.75	0.7	0.62	0.78
454		OxPC 38:3+1O; OxPC 18:0-20:3+1O; [M+FA-H]- C46H86NO9P	M+HCOO 1-	872.596										194.6										3.43										0.73
455		SM d43:1; SM d14:0/29:1; [M+FA-H]- C48H97N2O6P	M+HCOO 1-	873.699	199.4		39.2		85.1	60.7			219.6	61.7	5.13		5.08		5.07	5.13			5.13	5.08	0.92		0.91		0.92	0.92			0.93	0.92
456		OxPC 36:4+3O(2Cyc); OxPC 16:0-20:4+3O(2Cyc); [M+FA-H]- C44H80NO11P	M+HCOO 1-	874.544		406.1	1000.8	1149.5				1235.2	270.6	1212.4		2.6	2.65	2.61				2.58	2.62	2.64		0.82	0.76	0.81				0.76	0.82	0.82
457		PC 40:8; PC 18:2-22:6; [M+FA-H]- C48H80NO8P---PC 40:8; PC 20:4-20:4; [M+FA-H]- C48H80NO8P	M+HCOO 1-	874.56	830.4	542.8	726.1	380.8	825.7	940.6	729.3	878.7	1796.4		3.53	3.54	3.53	3.53	3.54	3.54	3.54	3.54	3.54		0.83	0.78	0.79	0.83	0.79	0.86	0.8	0.89	0.86
458		OxPC 36:3+3O; OxPC 16:0-20:3+3O; [M+FA-H]- C44H82NO11P	M+HCOO 1-	876.555	159.1		483.4	583.2	529.7			331.6		659.9	2.7		2.73	2.65	2.67			2.71		2.7	0.67		0.63	0.68	0.61			0.53		0.7
459		PC 40:7; PC 18:1-22:6; [M+FA-H]- C48H82NO8P---PC 40:7; PC 20:3-20:4; [M+FA-H]- C48H82NO8P	M+HCOO 1-	876.576	1376.3	749.9	1269.3	1000.8	1172.1	2170.2	1919.1	647.6	3269.2	1161.6	3.76	3.78	3.77	3.77	3.78	3.77	3.77	3.77	3.77	3.77	0.9	0.89	0.89	0.89	0.9	0.91	0.91	0.89	0.91	0.91
460		OxPC 36:2+3O; OxPC 18:1-18:1+3O; [M+FA-H]- C44H84NO11P	M+HCOO 1-	878.573		25.9								66.1		2.38								2.38		0.69								0.55
461		PC 40:6; PC 18:1-22:5; [M+FA-H]- C48H84NO8P---PC 40:6; PC 20:2-20:4; [M+FA-H]- C48H84NO8P	M+HCOO 1-	878.591	3891.8	1109.3	2899.4	1299.5	1768.7		1242.4	4390.6	3273.7	1155.7	3.93	3.9	3.93	3.89	3.9		3.89	3.91	3.93	3.89	0.77	0.77	0.79	0.79	0.86		0.82	0.69	0.83	0.84
462		PC 40:6; PC 18:0-22:6; [M+FA-H]- C48H84NO8P	M+HCOO 1-	878.592	4657.8	3112	3454.5	4024.5	5122.6	1911.8	1782.3	8325	2957.8	3399.6	4.06	4.07	4.07	4.07	4.07	4.07	4.07	4.07	4.07	4.07	0.92	0.92	0.92	0.92	0.93	0.92	0.92	0.96	0.92	0.9
463		OxPC 36:1+3O; OxPC 18:0-18:1+3O; [M+FA-H]- C44H86NO11P	M+HCOO 1-	880.589		17.7						14.5				2.62						2.65				0.72						0.56
464		PC 40:5; PC 18:0-22:5; [M+FA-H]- C48H86NO8P---PC 40:5; PC 20:1-20:4; [M+FA-H]- C48H86NO8P	M+HCOO 1-	880.604	587.7		505	1487		1104.8	1013.5	3025.7	1786.1	1298	4.31		4.31	4.11		4.13	4.13	4.15	4.13	4.11	0.83		0.85	0.82		0.85	0.84	0.9	0.88	0.79
465		PI 38:6; PI 16:0-22:6; [M-H]- C47H79O13P	M-H 1-	881.519						54.8			109.9							3.3			3.28							0.57			0.59
466		OxPC 38:6+2O; OxPC 16:0-22:6+2O; [M+FA-H]- C46H80NO10P	M+HCOO 1-	882.549	177.6	261	1206.4	1268.9	2118.4			1716.8	222.6	1388.7	2.85	2.86	2.97	3.02	3.02			2.98	2.86	2.96	0.91	0.59	0.71	0.67	0.71			0.72	0.68	0.61
467		PC 40:4; PC 18:0-22:4; [M+FA-H]- C48H88NO8P---PC 40:4; PC 20:0-20:4; [M+FA-H]- C48H88NO8P---PC 40:4; PC 20:1-20:3; [M+FA-H]- C48H88NO8P	M+HCOO 1-	882.621	789.3	548.8	681.7	817	946.1	476.9	466.7	613.5	946	757.8	4.44	4.46	4.43	4.43	4.46	4.34	4.34	4.35	4.38	4.41	0.87	0.94	0.86	0.89	0.93	0.84	0.79	0.9	0.85	0.85
468		PI 38:5; PI 18:1-20:4; [M-H]- C47H81O13P---PI 38:5; [M-H]-; GPIns(18:1(11E)/20:4(5E,8E,11E,14E)) C47H81O13P---PI 38:5; [M-H]-; GPIns(18:1(11E)/20:4(5Z,8Z,11Z,14Z)) C47H81O13P---PI 38:5; [M-H]-; GPIns(18:1(11E)/20:4(7E,10E,13E,16E)) C47H81O13P---PI 38:5; [M-H]-; GPIns(18:1(11Z)/20:4(5E,8E,11E,14E)) C47H81O13P---PI 38:5; [M-H]-; GPIns(18:1(11Z)/20:4(5Z,8Z,11Z,14Z)) C47H81O13P---PI 38:5; [M-H]-; GPI…	M-H 1-	883.535	314.1	198.7	367.3	428.4	328.5	573.9	414.4	154.7	1036.9	238.9	3.42	3.43	3.42	3.43	3.43	3.41	3.43	3.43	3.43	3.43	0.76	0.69	0.75	0.73	0.64	0.82	0.73	0.75	0.77	0.73
469		OxPC 38:4+2O(1Cyc); OxPC 18:1-20:3+2O(1Cyc); [M+FA-H]- C46H82NO10P---OxPC 38:5+2O; OxPC 16:0-22:5+2O; [M+FA-H]- C46H82NO10P---OxPC 38:5+2O; OxPC 18:1-20:4+2O; [M+FA-H]- C46H82NO10P	M+HCOO 1-	884.563				1052.2	1253.6			1064.5	215	1186.6				3.04	3.06			3.09	2.94	3.07				0.76	0.69			0.69	0.69	0.75
470		PC 40:3; PC 20:0-20:3; [M+FA-H]- C48H90NO8P---PC 40:3; PC 22:1-18:2; [M+FA-H]- C48H90NO8P	M+HCOO 1-	884.634		290.8		353.9	467.2	140.6			329.4	319.7		4.52		4.51	4.52	4.51			4.51	4.51		0.91		0.88	0.89	0.85			0.87	0.76
471		1-Octadecanoyl-2-(5Z,8Z,11Z,14Z-eicosatetraenoyl)-sn-glycero-3-phospho-(1'-myo-inositol) [M-H]- C47H83O13P NIST 1148659---1-Octadecanoyl-2-(5Z,8Z,11Z,14Z-eicosatetraenoyl)-sn-glycero-3-phospho-(1'-myo-inositol) [M-H]- C47H83O13P NIST 1148666	M-H 1-	885.551	6404.8	3737.7	6078.3	9076.6	7488.2	4713.9	2716	2370.4	10809.8	4143	3.68	3.69	3.68	3.69	3.69	3.69	3.69	3.68	3.69	3.69	0.83	0.82	0.83	0.83	0.83	0.83	0.83	0.82	0.83	0.83
472		SM d44:2; SM d14:0/30:2; [M+FA-H]- C49H97N2O6P	M+HCOO 1-	885.704	38.8	20.8						27.2		23.7	4.98	4.99						4.97		4.99	0.91	0.84						0.94		0.95
473		OxPC 38:3+2O(1Cyc); OxPC 18:0-20:3+2O(1Cyc); [M+FA-H]- C46H84NO10P	M+HCOO 1-	886.579	152.4	94.9	1198.9	808.2	1744.5			597.7	143	1364.5	3.08	3.09	3.36	3.3	3.39			2.88	3.09	3.22	0.69	0.79	0.84	0.87	0.84			0.83	0.64	0.81
474		PC 40:2; PC 16:0-24:2; [M+FA-H]- C48H92NO8P---PC 40:2; PC 18:1-22:1; [M+FA-H]- C48H92NO8P---PC 40:2; PC 20:0-20:2; [M+FA-H]- C48H92NO8P---PC 40:2; PC 22:0-18:2; [M+FA-H]- C48H92NO8P	M+HCOO 1-	886.65	108.8	121.4	109.1	99.2	192.8	62	51	59.7	119.7	101.7	4.7	4.78	4.71	4.71	4.79	4.7	4.73	4.75	4.75	4.71	0.73	0.91	0.79	0.7	0.76	0.77	0.79	0.72	0.83	0.76
475		PI 38:3; PI 18:0-20:3; [M-H]- C47H85O13P	M-H 1-	887.565			1274.1	2065.3	1454.7	1092.6	840	940.8	508.2	985.9			3.82	3.83	3.83	3.83	3.73	3.77	3.83	3.83			0.69	0.79	0.7	0.74	0.68	0.69	0.84	0.64
476		SM d44:1; SM d14:0/30:1; [M+FA-H]- C49H99N2O6P	M+HCOO 1-	887.718	47.4	18.2		29	32.7	23.2	17.7		43.7		5.24	5.28		5.27	5.29	5.3	5.3		5.28		0.95	0.89		0.91	0.89	0.92	0.91		0.91
477		OxPC 36:5+4O(2Cyc); OxPC 16:0-20:5+4O(2Cyc); [M+FA-H]- C44H78NO12P	M+HCOO 1-	888.523	42		466.9	493.6				67.3		547.5	2.35		2.43	2.44				2		2.49	0.7		0.55	0.52				0.5		0.71
478		OxPC 38:3+2O; OxPC 18:0-20:3+2O; [M+FA-H]- C46H86NO10P	M+HCOO 1-	888.592										440.1										3.3										0.58
479		PC 40:1; PC 16:0-24:1; [M+FA-H]- C48H94NO8P---PC 40:1; PC 22:0-18:1; [M+FA-H]- C48H94NO8P	M+HCOO 1-	888.67	43.4			45.7	140.4						5			4.97	4.83						0.8			0.69	0.65
480		OxPC 36:4+4O(2Cyc); OxPC 16:0-20:4+4O(2Cyc); [M+FA-H]- C44H80NO12P	M+HCOO 1-	890.54	169.7		1724.5	2030.6	2402					2223.2	2.55		2.71	2.72	2.67					2.74	0.73		0.66	0.61	0.55					0.54
481		PC 41:7; PC 19:1-22:6; [M+FA-H]- C49H84NO8P	M+HCOO 1-	890.583									54.6										3.92										0.69
482		PC 42:7e; PC 20:3e/22:4; [M+FA-H]- C50H88NO7P	M+HCOO 1-	890.638								111.1										4.48										0.6
483		HexCer-AP t42:0; HexCer-AP t18:0/24:0; [M-H]- C48H95NO10	M+HCOO 1-	890.695	40.2										4.92										0.58
484		OxPC 36:3+4O(1Cyc); OxPC 16:0-20:3+4O(1Cyc); [M+FA-H]- C44H82NO12P	M+HCOO 1-	892.551				796.1	718.9			329.7						2.51	2.58			2.15						0.74	0.8			0.7
485		OxPC 40:6+1O(1Cyc); OxPC 18:1-22:5+1O(1Cyc); [M+FA-H]- C48H82NO9P---PC(18:1/19,20-EpDPE) C48H82NO9P	M+HCOO 1-	892.57	92.9		174.1					141.3	146		3.21		3.19					3.24	3.11		0.73		0.74					0.69	0.92
486		PC 41:6; PC 19:0-22:6; [M+FA-H]- C49H86NO8P	M+HCOO 1-	892.607	83				111.4			258		56.4	4.23				4.22			4.24		4.22	0.82				0.79			0.84		0.63
487		OxPC 40:6+1O; OxPC 18:0-22:6+1O; [M+FA-H]- C48H84NO9P	M+HCOO 1-	894.583				210.7										3.43										0.79
488		OxPC 40:5+1O(1Cyc); OxPC 18:0-22:5+1O(1Cyc); [M+FA-H]- C48H84NO9P	M+HCOO 1-	894.583		57.7			139.6			483.2				3.24			2.91			3.45				0.8			0.84			0.86
489		OxPC 38:6+3O; OxPC 16:0-22:6+3O; [M+FA-H]- C46H80NO11P	M+HCOO 1-	898.543					774.1			1267.1	172.1	696.2					2.61			2.62	2.65	2.57					0.66			0.68	0.68	0.64
490		PC 42:10; PC 20:4-22:6; [M+FA-H]- C50H80NO8P	M+HCOO 1-	898.56	184.2	129	138.5	84.4	176.3	183.2	143.9		373.3	100.5	3.49	3.5	3.49	3.49	3.5	3.49	3.49		3.5	3.49	0.84	0.9	0.86	0.89	0.85	0.89	0.9		0.89	0.91
491		PI 39:4; PI 19:0-20:4; [M-H]- C48H85O13P	M-H 1-	899.567						79.1										3.85										0.54
492		OxPC 38:5+3O(2Cyc); OxPC 18:0-20:5+3O(2Cyc); [M+FA-H]- C46H82NO11P---OxPC 38:5+3O(2Cyc); OxPC 18:1-20:4+3O(2Cyc); [M+FA-H]- C46H82NO11P	M+HCOO 1-	900.559	215.6	332	777.2	919	871			1082.9	208	854.7	2.85	2.77	2.78	2.78	2.8			2.77	2.75	2.79	0.77	0.77	0.7	0.83	0.73			0.72	0.69	0.71
493		PC 42:9; PC 20:3-22:6; [M+FA-H]- C50H82NO8P---PC 42:9; PC 20:4-22:5; [M+FA-H]- C50H82NO8P	M+HCOO 1-	900.57						135.6			220.2							3.66			3.62							0.52			0.84
494		OxPC 38:4+3O(2Cyc); OxPC 18:0-20:4+3O(2Cyc); [M+FA-H]- C46H84NO11P---OxPC 38:4+3O; OxPC 18:1-20:3+3O; [M+FA-H]- C46H84NO11P	M+HCOO 1-	902.572	165.1			645.5	640.8					643.3	2.87			2.78	2.87					2.81	0.83			0.76	0.76					0.73
495		PC 42:8; PC 20:2-22:6; [M+FA-H]- C50H84NO8P	M+HCOO 1-	902.587	67.1		78.6		61.8	91.3		31.4	132.6		3.83		3.85		3.84	3.83		3.83	3.84		0.74		0.66		0.65	0.78		0.54	0.81
496		Cer-EOS d58:1; Cer-EOS d25:1/15:0-O-18:0; [M-H]- C58H113NO5	M-H 1-	902.853				40.5	34.7									4.91	4.92									0.74	0.8
497		PC 42:7; PC 20:1-22:6; [M+FA-H]- C50H86NO8P---PC 42:7; PC 20:2-22:5; [M+FA-H]- C50H86NO8P	M+HCOO 1-	904.603	149.7	96.9	137.5	114.1		186.7	178.1	98.5	283.3	133.9	4.1	4.09	4.11	4.11		4.09	4.09	4.11	4.09	4.11	0.7	0.54	0.54	0.61		0.63	0.74	0.69	0.59	0.58
498		PC 42:6; PC 20:0-22:6; [M+FA-H]- C50H88NO8P---PC 42:6; PC 20:1-22:5; [M+FA-H]- C50H88NO8P	M+HCOO 1-	906.623	172.7	187.7	114	154	275.3	106.5	110.6	216.9	248.5	146.1	4.4	4.39	4.41	4.41	4.41	4.28	4.28	4.37	4.28	4.41	0.85	0.91	0.81	0.81	0.87	0.83	0.85	0.79	0.78	0.86
499		OxPC 40:7+2O; OxPC 18:1-22:6+2O; [M+FA-H]- C48H82NO10P	M+HCOO 1-	908.563					395.8			459.2		372.1					3.13			3.05		3					0.62			0.63		0.79
500		PC 42:5; PC 22:1-20:4; [M+FA-H]- C50H90NO8P	M+HCOO 1-	908.635			88	118.1		73.4	74.2		163.9	124.8			4.45	4.49		4.45	4.45		4.45	4.47			0.74	0.79		0.86	0.62		0.81	0.82
501		PI 40:6; PI 18:0-22:6; [M-H]- C49H83O13P---PI 40:6; [M-H]-; GPIns(18:0/22:6(4Z,7Z,10Z,13Z,16Z,19Z)) C49H83O13P---PI 40:6; [M-H]-; GPIns(22:6(4Z,7Z,10Z,13Z,16Z,19Z)/18:0) C49H83O13P	M-H 1-	909.549	105.7	82.8	93.9	103.9	103.7		56.9	201.2	147.9	56.9	3.64	3.63	3.64	3.62	3.63		3.64	3.64	3.64	3.64	0.62	0.69	0.66	0.56	0.61		0.5	0.74	0.63	0.55
502		OxPC 40:6+2O; OxPC 18:0-22:6+2O; [M+FA-H]- C48H84NO10P---OxPC 40:6+2O; OxPC 18:1-22:5+2O; [M+FA-H]- C48H84NO10P	M+HCOO 1-	910.577			251.5	385	554.2			995.4					3.27	3.21	3.3			3.28					0.66	0.53	0.63			0.7
503		PC 42:4; PC 18:0-24:4; [M+FA-H]- C50H92NO8P---PC 42:4; PC 22:0-20:4; [M+FA-H]- C50H92NO8P	M+HCOO 1-	910.654	129.6	105.8	125	152.4					136.7	68.6	4.77	4.69	4.8	4.8					4.64	4.81	0.86	0.73	0.89	0.8					0.66	0.87
504		PC 42:3; PC 24:1-18:2; [M+FA-H]- C50H94NO8P	M+HCOO 1-	912.669						24.9	32.2									4.83	4.81									0.86	0.85
505		PI 40:4; PI 18:0-22:4; [M-H]- C49H87O13P---PI 40:4; PI 20:0-20:4; [M-H]- C49H87O13P---PI 40:4; [M-H]-; GPIns(20:0/20:4(5E,8E,11E,14E)) C49H87O13P---PI 40:4; [M-H]-; GPIns(20:0/20:4(5Z,8Z,11Z,14Z)) C49H87O13P---PI 40:4; [M-H]-; GPIns(20:0/20:4(7E,10E,13E,16E)) C49H87O13P---PI 40:4; [M-H]-; GPIns(20:4(5E,8E,11E,14E)/20:0) C49H87O13P---PI 40:4; [M-H]-; GPIns(20:4(5Z,8Z,11Z,14Z)/20:0) C49H87O13P---PI…	M-H 1-	913.58					92.1				113	37.8					3.97				3.98	4					0.58				0.61	0.68
506		OxPC 38:6+4O; OxPC 16:0-22:6+4O; [M+FA-H]- C46H80NO12P	M+HCOO 1-	914.539		175.1			1733.7			2040.1		1183.5		2.52			2.63			2.56		2.62		0.72			0.55			0.7		0.59
507		PC 42:2; PC 18:1-24:1; [M+FA-H]- C50H96NO8P---PC 42:2; PC 24:0-18:2; [M+FA-H]- C50H96NO8P	M+HCOO 1-	914.684		71.2				22.8			57.1	45.7		5.1				5.15			5.09	5.12		0.87				0.89			0.84	0.91
508		OxPC 38:5+4O(2Cyc); OxPC 18:1-20:4+4O(2Cyc); [M+FA-H]- C46H82NO12P	M+HCOO 1-	916.554			773.9					1484.4		1097.3			2.67					2.62		2.68			0.56					0.64		0.61
509		OxPC 38:5+4O(2Cyc); OxPC 18:0-20:5+4O(2Cyc); [M+FA-H]- C46H82NO12P	M+HCOO 1-	916.554		116.8										2.45										0.66
510		PC 42:1; PC 24:0-18:1; [M+FA-H]- C50H98NO8P	M+HCOO 1-	916.701								63.3	17.6									5.32	5.32									0.94	0.84
511		OxPC 38:4+4O(2Cyc); OxPC 18:0-20:4+4O(2Cyc); [M+FA-H]- C46H84NO12P	M+HCOO 1-	918.57			1202.6	1558.1	1694.8			1322.9		1246.2			2.86	2.89	2.89			2.86		2.85			0.59	0.76	0.65			0.72		0.61
512		PC 44:12; PC 22:6-22:6; [M+FA-H]- C52H80NO8P	M+HCOO 1-	922.558	23.2	21.6									3.42	3.45									0.74	0.69
513		OxPC 40:7+3O; OxPC 18:1-22:6+3O; [M+FA-H]- C48H82NO11P	M+HCOO 1-	924.558					202.5										2.78										0.66
514		OxPC 40:6+3O; OxPC 18:0-22:6+3O; [M+FA-H]- C48H84NO11P	M+HCOO 1-	926.572								672.1										2.86										0.65
515	*	Cer-EOS d60:1; Cer-EOS d27:1/15:0-O-18:0; [M-H]- C60H117NO5	M-H 1-	930.885		21.5	33.9	43.1	54.4							5.21	5.21	5.21	5.2							0.73	0.68	0.76	0.73
515	*	ISF of Cer-EOS d60:1; Cer-EOS d27:1/15:0-O-18:0; [M-H]- C60H117NO5	-	646.613		29			62.7							5.21			5.2							0.54			0.67
516	*	Cer-EODS d60:0; Cer-EODS d27:0/15:0-O-18:0; [M-H]- C60H119NO5	M-H 1-	932.901						25.7			84.3							5.49			5.49							0.71			0.73
516	*	ISF of Cer-EODS d60:0; Cer-EODS d27:0/15:0-O-18:0; [M-H]- C60H119NO5	-	648.629						18.1			52.2							5.49			5.49							0.58			0.64
517		PC 44:5; PC 24:1-20:4; [M+FA-H]- C52H94NO8P	M+HCOO 1-	936.667	130.8					20.7			36.1		4.79					4.83			4.79		0.82					0.6			0.84
518		HBMP 48:2; HBMP 14:1-16:0-18:1; [M-H]- C54H101O11P	M-H2O-H 1-	937.687					597.6										5										0.6
519		PC 44:4; PC 24:0-20:4; [M+FA-H]- C52H96NO8P	M+HCOO 1-	938.686			121.7			15.6	19.3		32.4				5.19			5.11	5.11		5.09				0.86			0.87	0.84		0.92
520		HBMP 48:1; HBMP 12:0-18:0-18:1; [M-H]- C54H103O11P---HBMP 48:1; HBMP 14:0-16:0-18:1; [M-H]- C54H103O11P	M-H2O-H 1-	939.705			198.9	65.6	312.2			101.5					5.23	6.38	5.31			5.36					0.56	0.78	0.66			0.64
521		OxPC 40:7+4O; OxPC 18:1-22:6+4O; [M+FA-H]- C48H82NO12P	M+HCOO 1-	940.553					314.3			711.7,378.9							2.73			2.62,2.26							0.56			0.63,0.64
522		HBMP 48:0; HBMP 14:0-16:0-18:0; [M-H]- C54H105O11P	M-H2O-H 1-	941.732					25.9										6.46										0.75
523		OxPC 40:6+4O; OxPC 18:0-22:6+4O; [M+FA-H]- C48H84NO12P	M+HCOO 1-	942.569								1067.7										2.79										0.73
524		Cer-EOS d58:2; Cer-EOS d25:1/15:0-O-18:1; [M-H]- C58H111NO5	M+HCOO 1-	946.835				42.3	56.5									6.55	6.52									0.54	0.58
525		PI 40:3; PI 18:0-22:3; [M-H]- C49H89O13P	M+HCOO 1-	961.604			21.9					21.3					3.22					3.2					0.59					0.65
526		HBMP 50:4; HBMP 16:0-16:4-18:0; [M-H]- C56H101O11P	M-H2O-H 1-	961.696				121.8	322.8									4.34	4.12									0.61	0.71
527		HBMP 50:2; HBMP 16:0-16:0-18:2; [M-H]- C56H105O11P---HBMP 50:2; HBMP 16:0-16:2-18:0; [M-H]- C56H105O11P	M-H2O-H 1-	965.721					909.8					187.7					4.68					4.73					0.52					0.57
528		HBMP 50:2; HBMP 16:0-16:1-18:1; [M-H]- C56H105O11P	M-H2O-H 1-	965.723				459.6										5.36										0.61
529		HBMP 50:3; HBMP 16:0-16:2-18:1; [M-H]- C56H103O11P	M-H 1-	981.731				567.7										5.49										0.62
530		HBMP 52:3; HBMP 16:0-18:1-18:2; [M-H]- C58H107O11P	M-H2O-H 1-	991.737					599.2										4.94										0.74
531		LPE 20:4; [M-H]- C25H44NO7P	2M-H 1-	1001.57		28.5			33.1							1.5			1.5							0.79			0.84
532		HBMP 52:5; HBMP 16:0-18:2-18:3; [M-H]- C58H103O11P	M-H 1-	1005.73										141.3										5.42										0.67
533		HBMP 54:6; HBMP 16:0-18:1-20:5; [M-H]- C60H105O11P	M-H2O-H 1-	1013.71				559.9										4.69										0.64
534		HBMP 54:5; HBMP 16:0-18:1-20:4; [M-H]- C60H107O11P	M-H2O-H 1-	1015.74				509.8										4.71										0.63
535		Pentaerythritol tetrakis(3,5-di-tert-butyl-4-hydroxyhydrocinnamate) [M-H]- C73H108O12 NIST 1202835	M-H 1-	1175.77						41.5		83.7								4.19		4.22								0.83		0.86

## Sheet: MetaboKit-Pos-Aqu
group	ISF	name	adduct	feature_m/z	KO1	KO2	KO3	KO4	KO5	WT1	WT2	WT3	WT4	WT5	RT_KO1	RT_KO2	RT_KO3	RT_KO4	RT_KO5	RT_WT1	RT_WT2	RT_WT3	RT_WT4	RT_WT5	score_KO1	score_KO2	score_KO3	score_KO4	score_KO5	score_WT1	score_WT2	score_WT3	score_WT4	score_WT5
1		Diethanolamine [M+H]+ C4H11NO2 NIST 1067774	M-H2O+H 1+	88.0751	234.9	273.8	297.2			293	248.2	241.4	256		1.14	1.14	1.15			1.16	1.14	1.15	1.14		0.86	0.87	0.82			0.88	0.9	0.85	0.85
2		Betaine aldehyde cation [Cat]+ C5H12NO NIST 1075549	M 1+	102.091		68.8	94.7	43.4					69.2			6.74	6.75	2.97					6.74			0.53	0.53	0.69					0.55
3		Betaine aldehyde cation [Cat+H2O]+ C5H12NO NIST 1075569---Betaine aldehyde cation [Cat]+ C5H12NO NIST 1075552---Betaine aldehyde cation [Cat]+ C5H12NO NIST 1075553	M 1+	102.091	89.6	46.7				45.9	72.7	165.4	90.5	58.4	2.96	2.96				2.96	2.96	2.98	2.96	2.99	0.64	0.65				0.65	0.68	0.76	0.64	0.61
4	*	Betaine aldehyde cation [Cat+H2O]+ C5H12NO NIST 1075570---Betaine aldehyde cation [Cat+H2O]+ C5H12NO NIST 1075571	M 1+	102.091	207.6	355.5	207	253	225.2						1.05	1.06	1.05	1.05	1.05						0.94	0.9	0.93	0.89	0.95
4	*	ISF of Betaine aldehyde cation [Cat+H2O]+ C5H12NO NIST 1075570---Betaine aldehyde cation [Cat+H2O]+ C5H12NO NIST 1075571	-	58.0648	134.6		283.8	222.4							1.03		1.03	1.03							0.76		0.87	0.63
5	*	Choline cation [Cat]+ C5H14NO NIST 1067855---Choline cation [Cat]+ C5H14NO NIST 1067856---Choline cation [Cat]+ C5H14NO NIST 1067857---Choline cation [Cat]+ C5H14NO NIST 1067859---Choline cation [Cat]+ C5H14NO NIST 1067860---Choline cation [Cat]+ C5H14NO NIST 1067861	M 1+	104.107	5646.2	4756.9	7087.2	5107.2	7384.5	527.6	339.6	590.5	784.4	1210.1	1.07	1.08	1.07	1.07	1.07	1.08	1.08	1.09	1.07	1.08	0.98	0.98	0.98	0.98	0.98	0.98	0.97	0.99	0.99	0.99
5	*	ISF of Choline cation [Cat]+ C5H14NO NIST 1067859---Choline cation [Cat]+ C5H14NO NIST 1067857---Choline cation [Cat]+ C5H14NO NIST 1067856---Choline cation [Cat]+ C5H14NO NIST 1067861---Choline cation [Cat]+ C5H14NO NIST 1067860---Choline cation [Cat]+ C5H14NO NIST 1067855	-	60.0805	85.6	77.3	110.2	84.5	120.7						1.07	1.08	1.07	1.07	1.07						0.64	0.81	0.81	0.7	0.64
6		Creatinine C4H7N3O---Creatinine [M+H]+ C4H7N3O NIST 1061056---Creatinine [M+H]+ C4H7N3O NIST 1061058	M+H 1+	114.065	71.4	101.1	77.2	78.4	93.1	90	95.6	1477.7	121.7	62	1.28	1.26	1.28	1.28	1.28	1.28	1.27	1.27	1.28	1.27	0.95	0.97	0.95	0.96	0.96	0.98	0.98	0.99	0.98	0.93
7		6-Aminocaproic acid [M+H]+ C6H13NO2 NIST 1065077	M-H2O+H 1+	114.091	114										6.43										0.74
8		6-Aminocaproic acid [M+H]+ C6H13NO2 NIST 1065076---6-Aminocaproic acid [M+H]+ C6H13NO2 NIST 1065078	M-H2O+H 1+	114.091		2317.3	2236.2	1971	1699	1579.6	1904.8	2529.4	2336.5	972.6		5.78	5.78	5.78	5.77	5.76	5.77	5.78	5.77	5.77		0.7	0.69	0.7	0.7	0.7	0.69	0.7	0.69	0.7
9	*	Betaine C5H11NO2	M+H 1+	118.086	3371.7	8456.5	10235.7	8140.7	8813.8	13452.3	11473.5	3046.7	27079	7591.8	1.01	1.02	1.01	1.01	1.01	1.01	1.02	1.02	1.01	1.02	0.98	0.98	0.98	0.98	0.98	0.98	0.98	0.98	0.98	0.98
9	*	ISF of Betaine C5H11NO2	-	58.0648	134.6	233.9	283.8	222.4	261.4	266.1	240.8	76.6		178.7	1.03	1.02	1.03	1.03	1.03	1.01	1.02	1.02		1.02	0.79	0.82	0.82	0.62	0.7	0.55	0.62	0.83		0.67
10		1H-Benzotriazole; LC-ESI-ITFT; MS2; CE C6H5N3	M+H 1+	120.055	13.3	10.1	11.1	11.2	10.4	14.6	19.4	13.1	14.7	8.6	6.83	6.34	6.87	6.86	6.83	6.85	6.85	6.83	6.87	6.85	0.68	0.52	0.66	0.61	0.57	0.7	0.73	0.63	0.67	0.57
11		(R)-(-)-2-Phenylglycinol [M+H-NH3]+ C8H11NO NIST 1212228	M-H2O+H 1+	120.08							18.9										9.43										0.53
12		Benzoic acid, 4-hydroxy- [M+H]+ C7H6O3 NIST 1056518---Benzoic acid, 4-hydroxy- [M+H]+ C7H6O3 NIST 1056521---Salicylic acid [M+H-H2O]+ C7H6O3 NIST 1148076---Salicylic acid [M+H-H2O]+ C7H6O3 NIST 1148080---Salicylic acid [M+H-H2O]+ C7H6O3 NIST 1148081	M-H2O+H 1+	121.028	118.6		112.8	108.3	116.5	116.6	109.2	113.7	110	106.1	13		13	12.99	13.01	13.01	12.99	13	13	12.99	0.55		0.58	0.67	0.71	0.67	0.63	0.64	0.55	0.69
13		6-Hydroxynicotinic acid C6H5NO3	M-H2O+H 1+	122.023	21				469						4.06				2.67						0.5				0.69
14		Niacinamide [2M+H]+ C6H6N2O NIST 1061095---Niacinamide; LC-ESI-QTOF; MS2; CE C6H6N2O	M+H 1+	123.055			112.5	89.9	147.3		63.1	103.6	143.7	71.4			2.23	2.22	2.24		2.21	2.22	2.23	2.24			0.78	0.82	0.78		0.84	0.84	0.88	0.82
15	*	ISF of Niacinamide [2M+H]+ C6H6N2O NIST 1061094	-	80.049	107.3	131	126.5	107.4	128.2	109.7			129.2	101.8	2.94	2.94	2.95	2.95	2.95	2.96			2.94	2.97	1	0.87	0.94	0.9	0.9	0.96			0.9	0.87
15	*	Niacinamide [2M+H]+ C6H6N2O NIST 1061094	M+H 1+	123.055	1932.4	3379.6	2879.6	2541.6	3395.5	1586.2	814	817	2834.7	1770.3	2.94	2.94	2.95	2.95	2.95	2.93	2.93	2.96	2.94	2.97	0.99	0.99	0.99	0.99	0.99	0.99	0.99	0.99	0.99	0.99
16		Taurine [M+H]+ C2H7NO3S NIST 1055596---Taurine [M+H]+ C2H7NO3S NIST 1055597---Taurine [M+H]+ C2H7NO3S NIST 1055598	M+H 1+	126.021	912.8	974.1	1048.9	1116.6	1344.8	600.6	684.6	1974.9	1265.3	586	0.97	0.97	0.97	0.97	0.96	0.97	0.98	0.98	0.97	0.98	0.83	0.84	0.83	0.84	0.87	0.83	0.84	0.85	0.83	0.84
17		DL-Norleucine methyl ester [2M+H]+ C7H15NO2 NIST 1073234---DL-Norleucine methyl ester [M+H]+ C7H15NO2 NIST 1073211---DL-Norleucine methyl ester [M+H]+ C7H15NO2 NIST 1073213	M-H2O+H 1+	128.106	29.2	26.8	22.1					23.4	21.3		7.41	7.4	7.41					7.41	7.41		0.81	0.85	0.79					0.83	0.87
18		.beta.-Homoproline [M+H]+ C6H11NO2 NIST 1062978	M+H 1+	130.085	23.7	22.2	29	20	25.2	16.2		13.8	26	18.6	2.4	2.41	2.42	2.41	2.42	2.43		2.44	2.42	2.43	0.96	0.98	0.96	0.97	0.96	0.95		0.94	0.96	0.96
19	*	Creatine [2M+H]+ C4H9N3O2 NIST 1063425---Creatine [M+H]+ C4H9N3O2 NIST 1063404---Creatine [M+H]+ C4H9N3O2 NIST 1063405	M+H 1+	132.076	279.3	206.9	335.3	272.4	256.2	452.2	412.5	11146.1	624.2	366.9	1.05	1.06	1.07	1.07	1.07	1.06	1.06	1.07	1.07	1.06	0.97	0.96	0.98	0.95	0.97	0.97	0.98	0.98	0.97	0.98
19	*	ISF of Creatine [M+H]+ C4H9N3O2 NIST 1063405---Creatine [M+H]+ C4H9N3O2 NIST 1063404---Creatine [2M+H]+ C4H9N3O2 NIST 1063425	-	90.0545								696.3										1.07										0.94
20	*	ISF of L-Leucine [M+H]+ C6H13NO2 NIST 1075770---L-Leucine [M+H]+ C6H13NO2 NIST 1075771	-	86.0958	556.1								490.4		1.67								1.66		0.86								0.82
20	*	L-Leucine [M+H]+ C6H13NO2 NIST 1075770---L-Leucine [M+H]+ C6H13NO2 NIST 1075771	M+H 1+	132.101	55.1		78.7		74.2	16.5			53.2		1.67		1.63		1.63	1.67			1.66		0.95		0.94		0.95	0.84			0.95
21		Adenine [2M+H]+ C5H5N5 NIST 1057271---Adenine [2M+H]+ C5H5N5 NIST 1057273	M+H 1+	136.061	582.2	1325.8	136.1	138.9	171.1	389.4	408.6	138.3	240.3	154.6	2.59	2.58	2.61	2.6	2.61	2.59	2.58	2.61	2.58	2.61	0.97	0.99	0.86	0.87	0.88	0.95	0.97	0.9	0.93	0.92
22		Hypoxanthine [M+H]+ C5H4N4O NIST 1072314---Hypoxanthine [M+H]+ C5H4N4O NIST 1072315	M+H 1+	137.045	520	478.2	482.4	604.4	570.5	410.1		460.4	763.6	618.1	1.61	1.6	1.61	1.61	1.61	1.6		1.59	1.6	1.6	0.87	0.85	0.87	0.88	0.88	0.86		0.89	0.89	0.89
23		Terpineol [M+H-H2O]+ C10H18O NIST 1056335---Terpineol [M+H]+ C10H18O NIST 1056324	M-H2O+H 1+	137.132	316.2	293.4		331.4	439.5	273.8		283.9	301		3.34	3.24		3.36	3.41	3.2		3.22	3.26		0.98	0.95		0.97	0.96	0.95		0.96	0.96
24		Trigonelline; LC-ESI-QTOF; MS2; CE C7H7NO2	M+H 1+	138.054						74.3	104.5									1.06	1.06									0.86	0.85
25		Butylphosphonic acid [M+H-H2O]+ C4H11O3P NIST 1189690	M+H 1+	139.049			42.8										1.65										0.54
26	*	ISF of Nicotinamide N-oxide [2M+H]+ C6H6N2O2 NIST 1066403	-	122.023	952.7	731.6	1000.1	785.5	1499						2.48	2.47	2.48	2.49	2.48						0.92	0.91	0.92	0.93	0.92
26	*	ISF of Nicotinamide N-oxide [2M+H]+ C6H6N2O2 NIST 1066403	-	94.028					63.4										2.48										0.86
26	*	Nicotinamide N-oxide [2M+H]+ C6H6N2O2 NIST 1066403	M+H 1+	139.05	339.6	251.8	351	278.5	528.5						2.48	2.47	2.48	2.49	2.48						0.6	0.61	0.6	0.61	0.6
27	*	ISF of Nicotinic acid N-oxide [M+H]+ C6H5NO3 NIST 1184624	-	122.023	952.7	731.6	1000.1	785.5	1499						2.48	2.47	2.48	2.49	2.48						0.9	0.89	0.91	0.9	0.94
27	*	ISF of Nicotinic acid N-oxide [M+H]+ C6H5NO3 NIST 1184624	-	94.028					63.4										2.48										0.81
27	*	Nicotinic acid N-oxide [M+H]+ C6H5NO3 NIST 1184624	M+H 1+	140.034	94.5	69	104.9	80.8	151.1						2.48	2.47	2.48	2.47	2.48						0.82	0.83	0.83	0.82	0.82
28		N-Ethylmaleimide [M+H+H2O]+ C6H7NO2 NIST 1062288	M+NH4 1+	143.081									43										1.87										0.53
29		4-Guanidinobutyric acid C5H11N3O2	M+H 1+	146.092	106	102.2	158	155.6	203	66.8	135.6		210	90.7	1.09	1.1	1.11	1.11	1.11	1.1	1.1		1.09	1.1	0.87	0.96	0.91	0.91	0.92	0.81	0.92		0.92	0.91
30		(3-Carboxypropyl)trimethylammonium cation [Cat]+ C7H16NO2 NIST 1055988---Acetylcholine cation [Cat]+ C7H16NO2 NIST 1065232---Acetylcholine cation [Cat]+ C7H16NO2 NIST 1065239	M 1+	146.117						82.5	98.2	87.2	204.2							1.01	1.02	1	1.01							0.76	0.77	0.83	0.79
31		Spermidine C7H19N3 MoNA 445245	M+H 1+	146.164		32.7	32.7	31.8								14.87	14.88	14.89								0.88	0.91	0.91
32	*	D-Pyroglutamic acid [M+H]+ C5H7NO3 NIST 1059571	M+NH4 1+	147.076								276.9										0.96										0.92
32	*	ISF of L-Glutamine [M+H]+ C5H10N2O3 NIST 1075740---L-Glutamine [M+H]+ C5H10N2O3 NIST 1075739	-	130.05	673.2	667.6	679.4	892.3	712	527.2	444.9	823.1		608.9	0.95	0.95	0.94	0.95	0.94	0.95	0.96	0.96		0.95	0.97	0.94	0.96	0.95	0.94	0.95	0.96	0.97		0.97
32	*	ISF of L-Glutamine [M+H]+ C5H10N2O3 NIST 1075740---L-Glutamine [M+H]+ C5H10N2O3 NIST 1075739	-	84.0438		128.1		164.4		110.8	90.5	173.9		115.7		0.95		0.95		0.95	0.96	0.96		0.95		0.88		0.9		0.94	0.89	0.97		0.96
32	*	L-Glutamine [M+H]+ C5H10N2O3 NIST 1075739---L-Glutamine [M+H]+ C5H10N2O3 NIST 1075740	M+H 1+	147.076	259.6	214.9	242.8	322.4	239	175.2	143.1			216.7	0.97	0.95	0.97	0.97	0.96	0.95	0.96			0.95	0.96	0.92	0.97	0.98	0.96	0.92	0.98			0.98
33	*	ISF of L-Glutamic acid [M+H]+ C5H9NO4 NIST 1075972---L-Glutamic acid [M+H]+ C5H9NO4 NIST 1075973	-	102.054									62.9										0.95										0.73
33	*	ISF of L-Glutamic acid [M+H]+ C5H9NO4 NIST 1075972---L-Glutamic acid [M+H]+ C5H9NO4 NIST 1075973	-	130.049		667.6					444.9		1034.2			0.95					0.96		0.95			0.99					0.97		0.97
33	*	ISF of L-Glutamic acid [M+H]+ C5H9NO4 NIST 1075972---L-Glutamic acid [M+H]+ C5H9NO4 NIST 1075973	-	84.0438		128.1		164.4		110.8	90.5	173.9	202.5	115.7		0.95		0.95		0.95	0.96	0.96	0.95	0.95		0.93		0.93		0.95	0.9	0.97	0.92	0.97
33	*	L-Glutamic acid [M+H]+ C5H9NO4 NIST 1075972---L-Glutamic acid [M+H]+ C5H9NO4 NIST 1075973	M+H 1+	148.06	259.2	262.8	286.9	286.5	358.7	227	155.7	383.7	472	196.5	0.93	0.93	0.92	0.92	0.94	0.93	0.94	0.94	0.93	0.93	0.97	0.97	0.98	0.98	0.98	0.98	0.97	0.96	0.97	0.97
34		3-Phenoxypropionic acid [M-H]- C9H10O3 NIST 1198429	M-H2O+H 1+	149.059					31.9										12.24										0.56
35		Triethanolamine [M+H-H2O]+ C6H15NO3 NIST 1108926---Triethanolamine [M+H]+ C6H15NO3 NIST 1108908---Triethanolamine [M+H]+ C6H15NO3 NIST 1108910---Triethanolamine [M+H]+ C6H15NO3 NIST 1108911	M+H 1+	150.112	27.1	36.5		36.7	28.8	38.2	38.5	43.7	29.1	21.8	1.36	1.37		1.36	1.38	1.37	1.37	1.38	1.36	1.37	0.8	0.91		0.92	0.87	0.92	0.98	0.98	0.91	0.93
36		Guanine [M+H]+ C5H5N5O NIST 1071442---Guanine [M+H]+ C5H5N5O NIST 1071443	M+H 1+	152.056	100.8	278.1	39.4	78.5		343.5	100.8	75			1.61	1.6	1.59	1.59		1.6	1.6	1.59			0.98	0.98	0.94	0.97		0.99	0.95	0.99
37	*	Histidine C6H9N3O2---L-Histidine [M+H]+ C6H9N3O2 NIST 1189281	M+H 1+	156.076	155.4	189.1	264.5	220.5	278.7	156.9	163	67.8	553.9	206.3	1.09	1.1	1.09	1.09	1.09	1.1	1.08	1.11	1.09	1.08	0.99	0.98	0.99	0.99	0.99	0.98	0.99	0.98	0.99	0.98
37	*	ISF of Histidine C6H9N3O2---L-Histidine [M+H]+ C6H9N3O2 NIST 1189281	-	110.071	116.8	131.2	179.5	161.9	195.8	110.7	110.7		410	138	1.09	1.1	1.09	1.09	1.09	1.1	1.08		1.09	1.08	0.95	0.9	0.91	0.89	0.91	0.84	0.85		0.9	0.89
38		Vitamin C [M+H]+ C6H8O6 NIST 1070719---Vitamin C [M+H]+ C6H8O6 NIST 1070720---Vitamin C [M+H]+ C6H8O6 NIST 1070722---l-ascorbic acid C6H8O6	M-H2O+H 1+	159.028	53.8		53.8	58.6	171.3						4.37		4.36	4.37	4.37						0.72		0.84	0.78	0.81
39		2-Propyl-2-pentenoic acid [M+H]+ C8H14O2 NIST 1168071---2-Propyl-2-pentenoic acid [M+H]+ C8H14O2 NIST 1168072---2-Propyl-2-pentenoic acid [M+H]+ C8H14O2 NIST 1168073	M+NH4 1+	160.133	319.1			258			216.2				1.05			1.05			1.06				0.51			0.5			0.52
40		Carnitine C7H15NO3	M+H 1+	162.112	3045.2	3555.8	3963.3	3552.6	5009	2379.1	2516.6	5282.8	4793.4	2339	1.01	1.02	1.01	1.01	1.01	1.01	1	1	1.01	1	0.97	0.97	0.97	0.97	0.97	0.97	0.97	0.97	0.97	0.97
41		Pterine [M+H]+ C6H5N5O NIST 1063638	M+H 1+	164.056	6.2				12.8	14.1	19.6		37.6	20.1	2.25				2.26	2.27	2.23		2.25	2.25	0.87				0.9	0.84	0.87		0.84	0.9
42	*	ISF of Phenylalanine C9H11NO2---DL-Phenylalanine [2M+H]+ C9H11NO2 NIST 1057640	-	120.081	102.8	40.7	175.3	94	174.6			59.7	173.6	56.5	3.21	3.21	3.2	3.22	3.22			3.22	3.21	3.23	0.92	0.87	0.9	0.87	0.9			0.87	0.89	0.91
42	*	DL-Phenylalanine [2M+H]+ C9H11NO2 NIST 1057640---Phenylalanine C9H11NO2	M+H 1+	166.086	48.8	31.8	77.5	50.4	82.1	22.3	27.4	35.5	67.2	32.5	3.21	3.21	3.2	3.22	3.22	3.21	3.21	3.22	3.21	3.21	0.99	0.99	0.99	0.99	0.99	0.99	0.99	0.98	0.99	0.99
43	*	1,2-Benzenedicarboxylic acid [M+H]+ C8H6O4 NIST 1109154---1,2-Benzenedicarboxylic acid [M+H]+ C8H6O4 NIST 1109155---1,2-Benzenedicarboxylic acid [M+H]+ C8H6O4 NIST 1109156---1,2-Benzenedicarboxylic acid [M+H]+ C8H6O4 NIST 1109157---1,2-Benzenedicarboxylic acid [M+H]+ C8H6O4 NIST 1109158---Phthalic acid C8H6O4	M+H 1+	167.033	753	703		717.6	746	749.7	661.2	695.1	731	688.8	13.67	13.67		13.66	13.68	13.68	13.66	13.67	13.67	13.66	0.71	0.91		0.71	0.82	0.67	0.8	0.9	0.89	0.7
43	*	ISF of 1,2-Benzenedicarboxylic acid [M+H]+ C8H6O4 NIST 1109155---Phthalic acid C8H6O4---1,2-Benzenedicarboxylic acid [M+H]+ C8H6O4 NIST 1109158---1,2-Benzenedicarboxylic acid [M+H]+ C8H6O4 NIST 1109156---1,2-Benzenedicarboxylic acid [M+H]+ C8H6O4 NIST 1109154---1,2-Benzenedicarboxylic acid [M+H]+ C8H6O4 NIST 1109157	-	149.023	4352.6	4463.2		4438.7	4310.6	4344	4173.8	4311	4246	4275.1	13.67	13.67		13.66	13.68	13.68	13.66	13.67	13.67	13.66	0.84	0.94		0.74	0.97	0.73	0.73	0.98	0.87	0.98
44		3,5,5-Trimethyl-1-hexanol [M+Na]+ C9H20O NIST 1110639	M+Na 1+	167.143						25.7										12.33										0.64
45		alpha-Methylhistidine C7H11N3O2	M+H 1+	170.095					166.1										1.38										0.53
46		L-Histidine, 3-methyl- [2M+H]+ C7H11N3O2 NIST 1057248	M+H 1+	170.095							253.6										1.16										0.52
47		3-Hydroxycapric acid [M+H]+ C10H20O3 NIST 1060940	M-H2O+H 1+	171.138					92.6				135.7						13.49				11.57						0.52				0.59
48		3-Hydroxycapric acid [M+H-H2O]+ C10H20O3 NIST 1061376---Butyl 2-butoxyacetate [M+H]+ C10H20O3 NIST 1065900	M-H2O+H 1+	171.138	220	156.9	132.5								11.57	11.56	11.57								0.55	0.52	0.56
49	*	ISF of Vitamin C [M+H]+ C6H8O6 NIST 1070719---Vitamin C [M+H]+ C6H8O6 NIST 1070720	-	141.018	128.7		127.4	131.4	384.2						4.37		4.36	4.37	4.37						0.79		0.85	0.77	0.88
49	*	Vitamin C [M+H]+ C6H8O6 NIST 1070719---Vitamin C [M+H]+ C6H8O6 NIST 1070720	M+H 1+	177.039	153.5		157.1	158.5	445.4						4.37		4.36	4.37	4.37						0.63		0.58	0.62	0.74
50		Cotinine C10H12N2O	M+H 1+	177.103			26.1		16.9	20.7	35	25.9		24.4			6.85		6.39	6.39	6.83	6.84		6.84			0.61		0.79	0.85	0.64	0.57		0.65
51		Serotonin C10H12N2O	M+H 1+	177.102	25.6	22.1		25.6		37.6			24.7		6.83	6.86		6.83		6.84			6.83		0.66	0.67		0.61		0.67			0.69
52		Phenmetrazine C11H15NO	M+H 1+	178.122						42.5										9.43										0.7
53		Phenyltriethylammonium cation [Cat]+ C12H20N NIST 1187289---Phenyltriethylammonium cation [Cat]+ C12H20N NIST 1187292	M 1+	178.159	31.8		21.9		22.4	21.9		24.9			12.34		12.31		12.36	12.36		12.34			0.5		0.5		0.55	0.57		0.52
54		.beta.-D-Glucopyranose, 1,6-anhydro- [M+H]+ C6H10O5 NIST 1070757---.beta.-D-Glucopyranose, 1,6-anhydro- [M+H]+ C6H10O5 NIST 1070758---.beta.-D-Glucopyranose, 1,6-anhydro- [M+H]+ C6H10O5 NIST 1070759---.beta.-D-Glucopyranose, 1,6-anhydro- [M+H]+ C6H10O5 NIST 1070761	M+NH4 1+	180.086	202.9	202.8		194.1	256.4		82.1			95.6	1.01	1.02		1.01	1.01		1			1.02	0.81	0.89		0.91	0.9		0.76			0.79
55		C10H13NO2; PlaSMA ID-493 C10H13NO2	M+H 1+	180.101	24									5.7	2.27									2.29	0.64									0.55
56		Tributylamine [M+H]+ C12H27N NIST 1147457---Tributylamine [M+H]+ C12H27N NIST 1147458---Tributylamine [M+H]+ C12H27N NIST 1147459	M+H 1+	186.221	129.2	124.1	107.2	120.9	109.1	124.7	129.6	123.9	100.5	102.8	9.44	9.44	9.43	9.43	9.44	9.43	9.45	9.44	9.45	9.43	0.87	0.89	0.85	0.88	0.89	0.89	0.88	0.86	0.84	0.85
57		DL-Indole-3-lactic acid [M+H-H2O]+ C11H11NO3 NIST 1071872---DL-Indole-3-lactic acid [M+H-H2O]+ C11H11NO3 NIST 1071887---DL-Indole-3-lactic acid [M+H-H2O]+ C11H11NO3 NIST 1071888	M-H2O+H 1+	188.071	57	40.8	110.7	93	119.7	19.4	29.7	34.7	83.5	35.2	4.69	4.69	4.7	4.69	4.7	4.69	4.71	4.7	4.7	4.7	0.92	0.88	0.94	0.94	0.95	0.89	0.9	0.95	0.93	0.94
58	*	ISF of N-Acetyl-L-glutamic acid [M+H]+ C7H11NO5 NIST 1180207---N-Acetyl-L-glutamic acid [M+H]+ C7H11NO5 NIST 1071989---N-Acetyl-L-glutamic acid [M+H]+ C7H11NO5 NIST 1071984	-	130.049		667.6		892.3		527.2	444.9		1034.2	608.9		0.95		0.95		0.95	0.96		0.95	0.95		0.74		0.83		0.8	0.81		0.79	0.85
58	*	ISF of N-Acetyl-L-glutamic acid [M+H]+ C7H11NO5 NIST 1180207---N-Acetyl-L-glutamic acid [M+H]+ C7H11NO5 NIST 1071989---N-Acetyl-L-glutamic acid [M+H]+ C7H11NO5 NIST 1071984	-	84.0438		128.1		164.4		110.8	90.5		202.5	115.7		0.95		0.95		0.95	0.96		0.95	0.95		0.71		0.78		0.81	0.73		0.74	0.91
58	*	ISF of N-Acetyl-L-glutamic acid [M+H]+ C7H11NO5 NIST 1180207---N-Acetyl-L-glutamic acid [M+H]+ C7H11NO5 NIST 1071989---N-Acetyl-L-glutamic acid [M+H]+ C7H11NO5 NIST 1071984	-	102.054									62.9										0.95										0.61
58	*	N-Acetyl-L-glutamic acid [M+H]+ C7H11NO5 NIST 1071984---N-Acetyl-L-glutamic acid [M+H]+ C7H11NO5 NIST 1071989---N-Acetyl-L-glutamic acid [M+H]+ C7H11NO5 NIST 1180207	M+H 1+	190.07		31		42.6		23.2	28.7		65	39.9		0.93		0.92		0.93	0.94		0.93	0.93		0.97		0.98		0.82	0.79		0.75	0.68
59		Tetraethylene glycol [M+H]+ C8H18O5 NIST 1065722---Tetraethylene glycol [M+H]+ C8H18O5 NIST 1065723---Tetraethylene glycol [M+H]+ C8H18O5 NIST 1065725	M+H 1+	195.122	84	71	77.4	81.6	68.2	81.3	80.3	87.6	85.9	69.3	5.1	5.1	5.11	5.11	5.11	5.11	5.1	5.1	5.11	5.11	0.96	0.95	0.96	0.97	0.95	0.96	0.96	0.99	0.95	0.95
60		D-(+)-Mannose [2M+H]+ C6H12O6 NIST 1070812---D-(+)-Mannose [M+H-H2O]+ C6H12O6 NIST 1069068---D-Psicose [M+H-H2O]+ C6H12O6 NIST 1070742	M+NH4 1+	198.096	344.2	334.2	391.3	318	418.7		132			163.2	1.01	1.02	1.01	1.01	1.01		1			1.02	0.87	0.94	0.9	0.92	0.94		0.94			0.86
61	*	Acetyl-L-carnitine [2M+H]+ C9H17NO4 NIST 1057145---Acetyl-L-carnitine [M+H]+ C9H17NO4 NIST 1057124	M+H 1+	204.123	675.8	424.9	1220.2	1275.8	867.3	3927.7	4744.3	7525.6	13533.3	4450.5	1.18	1.16	1.18	1.18	1.17	1.18	1.16	1.17	1.18	1.16	0.98	0.97	0.98	0.98	0.98	0.97	0.98	0.97	0.97	0.98
61	*	ISF of Acetyl-L-carnitine [M+H]+ C9H17NO4 NIST 1057124---Acetyl-L-carnitine [2M+H]+ C9H17NO4 NIST 1057145	-	145.049									304.9										1.18										0.86
62		Diethyl phthalic acid C12H14O4 MoNA 444674	M-H2O+H 1+	205.086	4106	4008.8	4044.9	4051	3813.4	3884.1	3709	3942	3707.4	3590.8	13	13	13	12.99	12.99	12.99	12.99	13	13	12.99	0.96	0.95	0.95	0.95	0.95	0.95	0.95	0.96	0.94	0.96
63		Dexpanthenol [M+H]+ C9H19NO4 NIST 1198971---Dexpanthenol [M+H]+ C9H19NO4 NIST 1198974---Dexpanthenol [M+H]+ C9H19NO4 NIST 1198978---Panthenol C9H19NO4	M+H 1+	206.138	22.6	16.8	27	65.6	36.5	39.3	38.9	28.1	80.1	20.3	5.02	5.04	5.04	5.04	5.05	5.04	5.04	5.04	5.05	5.02	0.86	0.83	0.83	0.94	0.93	0.86	0.77	0.94	0.93	0.89
64		Propionylcarnitine C10H19NO4	M+H 1+	218.138	100.3	161.1	304.6	158.4	146.9	83.5	131.2	318.7	209	120	1.76	1.77	1.77	1.77	1.77	1.76	1.77	1.77	1.76	1.77	0.97	0.97	0.97	0.98	0.97	0.95	0.97	0.97	0.98	0.98
65		Pantothenate C9H17NO5---Pantothenic acid C9H17NO5---Pantothenic acid C9H17NO5 MoNA 448179---Pantothenic acid [M+H]+ C9H17NO5 NIST 1055164	M+H 1+	220.117	132	110.9	173.2	162.5	224.8	46.7	64	199.5	157.5	63.6	1.93	1.93	1.92	1.93	1.92	1.93	1.93	1.91	1.91	1.91	0.87	0.83	0.89	0.84	0.91	0.76	0.77	0.85	0.84	0.73
66		1,3-Dicyclohexylurea [M+H]+ C13H24N2O NIST 1147490	M+H 1+	225.195	65.7	50.5	46.1	63.9	44.6	82	87.5	66.4	50.8	68	11.27	11.27	11.27	11.28	11.29	11.28	11.28	11.27	11.28	11.28	0.68	0.69	0.59	0.65	0.67	0.79	0.79	0.74	0.66	0.76
67	*	Ergothioneine C9H15N3O2S---Ergothioneine [2M+H]+ C9H15N3O2S NIST 1114337	M+H 1+	230.095	324.2	118.2	112.9	384.7	368	541	534	117.4	1940.8	716.4	1.11	1.12	1.11	1.11	1.11	1.12	1.1	1.11	1.12	1.1	0.95	0.94	0.94	0.95	0.94	0.95	0.94	0.92	0.94	0.94
67	*	ISF of Ergothioneine C9H15N3O2S---Ergothioneine [2M+H]+ C9H15N3O2S NIST 1114337	-	186.105	109.3			130.2	111.7	151.2	173.6	27.3	594.6	228.5	1.11			1.11	1.11	1.12	1.1	1.11	1.12	1.1	0.89			0.96	0.93	0.96	0.94	0.69	0.96	0.95
67	*	ISF of Ergothioneine C9H15N3O2S---Ergothioneine [2M+H]+ C9H15N3O2S NIST 1114337	-	127.032									94.7										1.12										0.85
68		N,N-Dimethyldodecylamine N-oxide C14H31NO	M+H 1+	230.247		46.6										12.49										0.88
69		Butyryl carnitine (isomer of 920); PlaSMA ID-919 C11H21NO4	M+H 1+	232.154	113.5	466.2	294.1	289	322.7	86.2	338	122	648.9	198.7	3.73	3.74	3.74	3.76	3.76	3.74	3.74	3.74	3.74	3.76	0.72	0.72	0.75	0.75	0.72	0.74	0.75	0.7	0.75	0.71
70		Diuron; LC-ESI-ITFT; MS2; CE C9H10Cl2N2O	M+H 1+	233.024	39.9		30.4	30.7	31	76.1	37	46.3	23	22.5	10.72		10.72	10.71	10.71	10.71	10.72	10.71	10.72	10.71	0.84		0.83	0.86	0.81	0.85	0.82	0.81	0.82	0.7
71		Betaine [2M+H]+ C5H11NO2 NIST 1058977	2M+H 1+	235.165						171.2			388.5							1.01			1.01							0.98			0.99
72		6-Biopterin [M+H]+ C9H11N5O3 NIST 1071179---6-Biopterin [M+H]+ C9H11N5O3 NIST 1071180---6-Biopterin [M+H]+ C9H11N5O3 NIST 1071181	M+H 1+	238.093	14.3	15	18	20.1	29.2		6		17.1	9.4	2.3	2.32	2.35	2.33	2.34		2.31		2.31	2.33	0.83	0.82	0.81	0.83	0.83		0.71		0.81	0.55
73		Anserine C10H16N4O3 MoNA 448174	M+H 1+	241.129								740.8										1.19										0.97
74		1-Hexadecylamine [M+H]+ C16H35N NIST 1188261---1-Hexadecylamine [M+H]+ C16H35N NIST 1188263	M+H 1+	242.284	128.4	117.9	111.3	114.8		127.3		114.3	104.5	109.3	12.16	12.15	12.15	12.15		12.15		12.16	12.16	12.15	0.58	0.63	0.62	0.61		0.55		0.61	0.52	0.59
75		1-Hexadecylamine [M+H]+ C16H35N NIST 1188264	M+H 1+	242.284			36.5		106.9								13.58		12.16								0.65		0.51
76		D-Glucose 6-phosphate [2M+H]+ C6H13O9P NIST 1178339---D-Glucose 6-phosphate [M+H-H2O]+ C6H13O9P NIST 1178383---D-Mannose 6-phosphate [M+H-H2O]+ C6H13O9P NIST 1159985---D-Mannose-6-phosphate; LC-ESI-QTOF; MS2; CE C6H13O9P	M-H2O+H 1+	243.026	45.8			54.1	56.4			319.1		63.9	0.93			0.92	0.92			0.94		0.93	0.82			0.76	0.73			0.93		0.87
77	*	ISF of Uridine C9H12N2O6---Uridine [M+H]+ C9H12N2O6 NIST 1070924	-	113.034	121.8	124.8	141.3	137.5	195.9						1.99	1.99	2	2	2.01						0.79	0.78	0.85	0.84	0.81
77	*	Uridine C9H12N2O6---Uridine [M+H]+ C9H12N2O6 NIST 1070924	M+H 1+	245.076	29.6	30	53.8	32	53.3						2.01	2.01	2.02	2	2.01						0.97	0.97	0.98	0.98	0.97
78		Atractylenolide III C15H20O3	M+H 1+	249.148		16.7										11.81										0.56
79		Tri(propylene glycol) butyl ether [M+H]+ C13H28O4 NIST 1110758---Tri(propylene glycol) butyl ether [M+H]+ C13H28O4 NIST 1110759---Tri(propylene glycol) butyl ether [M+H]+ C13H28O4 NIST 1110762	M+H 1+	249.206	28.6	27.7	21.4	29.2	23.8	31.7	18.6	20.6	19.8	22.7	11.48	11.49	11.5	11.49	11.52	11.49	11.49	11.48	11.5	11.51	0.85	0.76	0.81	0.74	0.83	0.89	0.81	0.74	0.78	0.7
80		Adenosine; LC-ESI-QTOF; MS2; CE C10H13N5O4	M-H2O+H 1+	250.093			33.7	49.5	218.4				260.2	49.7			5.72	5.73	5.73				5.73	5.73			0.9	0.91	0.91				0.93	0.93
81		Taurine [M+H]+ C2H7NO3S NIST 1173806	2M+H 1+	251.036								121.4										0.96										0.97
82		Inosine [2M+H]+ C10H12N4O5 NIST 1070317	M-H2O+H 1+	251.077					30.7										4.72										0.93
83		Daidzein C15H10O4	M+H 1+	255.065									26.2										9.35										0.81
84		Palmitamide [M+H]+ C16H33NO NIST 1192369---Palmitamide [M+H]+ C16H33NO NIST 1192371---Palmitamide [M+H]+ C16H33NO NIST 1192372	M+H 1+	256.263	329.9	333		292.6	328			338.2	334.1		14.06	14.06		14.07	14.06			14.06	14.06		0.61	0.68		0.67	0.58			0.67	0.66
85	*	ISF of sn-Glycero-3-phosphocholine; LC-ESI-QTOF; MS2; CE C8H21NO6P	-	184.073	625.4	631.8	1784	1406.9	1543.7	248.9		69.1	302.4	1644.8	0.97	0.97	0.97	0.97	0.99	0.97		0.96	0.95	1	0.74	0.76	0.74	0.74	0.75	0.74		0.75	0.73	0.72
85	*	sn-Glycero-3-phosphocholine; LC-ESI-QTOF; MS2; CE C8H21NO6P	M 1+	258.11	7975.4	9536.7	7577.4	6094.6	9130.4	2715.3	2509.4	2518.1	5527.1	6208.6	0.97	0.97	0.97	0.97	0.96	0.97	0.98	0.98	0.97	0.98	0.95	0.95	0.95	0.95	0.95	0.95	0.95	0.95	0.95	0.95
86		D-Glucose 6-phosphate [2M+H]+ C6H13O9P NIST 1178338---D-Glucose 6-phosphate [2M+H]+ C6H13O9P NIST 1178339---D-Glucose 6-phosphate [2M+H]+ C6H13O9P NIST 1178340---D-myo-Inositol-4-phosphate [M+H]+ C6H13O9P NIST 1130899---D-myo-Inositol-4-phosphate [M+H]+ C6H13O9P NIST 1130909	M+H 1+	261.037	159.6		165.2	176.3	230			194.5	73.2	55.7	0.9		0.91	0.91	0.89			0.94	0.93	0.92	0.96		0.92	0.88	0.95			0.87	0.62	0.62
87		gamma-Glutamylleucine C11H20N2O5	M+H 1+	261.146	38.6			45.7	46.5				36.7		2.27			2.27	2.28				2.27		0.54			0.77	0.76				0.61
88		Dibutyl phthalate C16H22O4 MoNA 444664	M-H2O+H 1+	261.148									1256.3										13.67										0.81
89		Creatine [2M+H]+ C4H9N3O2 NIST 1063416	2M+H 1+	263.146								298										1.07										0.99
90		Sulfamerazine C11H12N4O2S GNPS-LIBRARY 374974---Sulfamerazine [M+H]+ C11H12N4O2S NIST 1066138---Sulfamerazine [M+H]+ C11H12N4O2S NIST 1066139	M+H 1+	265.075			20.1			40.7	88.8						6.33			6.34	6.34						0.65			0.97	0.98
91	*	ISF of Thiamine cation [Cat]+ C12H17N4OS NIST 1058457---Thiamine cation [Cat]+ C12H17N4OS NIST 1058458---Thiamine cation [Cat]+ C12H17N4OS NIST 1058460---Thiamine cation [Cat]+ C12H17N4OS NIST 1058456	-	144.047		62.5	67.6	85.6								3.59	3.61	3.61								0.53	0.55	0.52
91	*	ISF of Thiamine cation [Cat]+ C12H17N4OS NIST 1058457---Thiamine cation [Cat]+ C12H17N4OS NIST 1058458---Thiamine cation [Cat]+ C12H17N4OS NIST 1058460---Thiamine cation [Cat]+ C12H17N4OS NIST 1058456	-	122.071	86	101.3	110.1	134.5	174.6						3.59	3.59	3.61	3.61	3.63						0.6	0.64	0.79	0.7	0.71
91	*	Thiamine cation [Cat]+ C12H17N4OS NIST 1058456---Thiamine cation [Cat]+ C12H17N4OS NIST 1058457---Thiamine cation [Cat]+ C12H17N4OS NIST 1058458---Thiamine cation [Cat]+ C12H17N4OS NIST 1058460	M 1+	265.111	255.5	267.9	308.7	370.3	468.2	30.6	33.5	16.3	88.6	62.6	3.59	3.59	3.61	3.61	3.63	3.61	3.59	3.64	3.6	3.63	0.98	0.97	0.98	0.98	0.98	0.97	0.96	0.92	0.97	0.97
92		Tri-isobutylphosphate C12H27O4P---Tributyl phosphate [2M+H]+ C12H27O4P NIST 1147677---Tributyl phosphate [M+H]+ C12H27O4P NIST 1147659---Tributyl phosphate [M+H]+ C12H27O4P NIST 1147661	M+H 1+	267.172	55.8	52.1	48.8	54.7	48.6	72.7	102.6	60.9	62.3	68.4	12.84	12.83	12.83	12.85	12.82	12.84	12.84	12.84	12.83	12.82	0.91	0.92	0.92	0.93	0.91	0.97	0.95	0.91	0.94	0.98
93	*	Adenosine C10H13N5O4---Adenosine; LC-ESI-QTOF; MS2; CE C10H13N5O4	M+H 1+	268.104	2496.8	884.7	2305.8	2347.5	2902.5	1069	689.6	1951.2	2383.4	1071.8	4.86	4.86	4.86	4.87	4.86	4.86	4.85	4.85	4.86	4.87	0.99	0.99	0.99	0.99	0.99	0.99	0.99	0.99	0.99	0.98
93	*	ISF of Adenosine C10H13N5O4---Adenosine; LC-ESI-QTOF; MS2; CE C10H13N5O4	-	136.061	171.9	66.5	162.6	174.4	206.7	76.9		146.6	163.6	74.7	4.86	4.86	4.86	4.87	4.86	4.86		4.85	4.86	4.87	0.92	0.87	0.91	0.88	0.89	0.89		0.83	0.97	0.88
94	*	ISF of Inosine C10H12N4O5---Inosine [2M+H]+ C10H12N4O5 NIST 1070317---Inosine [M+H]+ C10H12N4O5 NIST 1070306	-	137.045	2811.9	2642	3228.6	2731.9	3499.5	1151.7	809.1	1340	1932.5	2164.8	3.06	3.05	3.07	3.07	3.07	3.06	3.06	3.08	3.06	3.09	0.91	0.9	0.9	0.93	0.91	0.93	0.92	0.91	0.92	0.91
94	*	Inosine C10H12N4O5---Inosine [2M+H]+ C10H12N4O5 NIST 1070317---Inosine [M+H]+ C10H12N4O5 NIST 1070306	M+H 1+	269.088	1353.9	1286.9	1540.8	1318.6	1691.8	568.1	404.3	682	924.7	1052	3.06	3.05	3.07	3.07	3.07	3.06	3.06	3.08	3.06	3.09	0.99	0.99	0.99	0.99	0.99	0.99	0.99	0.99	0.99	0.99
95	*	Dibutyl phthalate C16H22O4 MoNA 449139	M+H 1+	279.159	3243.4	3352.5,4505.5	3298.6,4558.8	3299.8		3294	3187.9,4402.9	2767.8,4665.9	3237.6	3184.7,4293.0	13.67	13.67,13.00	13.67,13.00	13.66		13.68	13.66,12.99	13.67,13.00	13.67	13.66,12.99	0.93	0.93,0.97	0.94,0.96	0.93		0.94	0.93,0.97	0.95,0.97	0.92	0.92,0.96
95	*	ISF of Dibutyl phthalate C16H22O4 MoNA 449139	-	149.023	4352.6	4463.2	4417.4	4438.7	4310.6	4344	4173.8	4311	4246	4275.1	13.67	13.67	13.67	13.66	13.68	13.68	13.66	13.67	13.67	13.66	0.89	0.87	0.81	0.88	0.78	0.79	0.85	0.84	0.86	0.88
96	*	Dibutyl phthalate C16H22O4 MoNA 444665	M+H 1+	279.159	4668.3			4428.4	3308.0,4394.7	4668			4266.3		13			12.99	13.68,12.99	13.01			13		0.97			0.97	0.94,0.97	0.97			0.96
96	*	ISF of Dibutyl phthalate C16H22O4 MoNA 444665	-	149.023	6759.6	6884.2	6905.5	6809.5	5829.4	6607.8	6501.1	7023.4	6296.4	6244.7	13	13	13	12.99	12.99	12.99	12.99	13	13	12.99	0.81	0.81	0.8	0.8	0.81	0.8	0.81	0.8	0.82	0.81
97		9-Octadecenamide, (Z)- [2M+H]+ C18H35NO NIST 1192062---9-Octadecenamide, (Z)- [M+H-NH3]+ C18H35NO NIST 1192066---9-Octadecenamide, (Z)- [M+H-NH3]+ C18H35NO NIST 1192067---9-Octadecenamide, (Z)- [M+H]+ C18H35NO NIST 1192035---9-Octadecenamide, (Z)- [M+H]+ C18H35NO NIST 1192037---9-Octadecenamide, (Z)- [M+H]+ C18H35NO NIST 1192047	M+H 1+	282.279	273.4				266.5	271.8	267	275.9	278.9	252.3	14.21				14.22	14.21	14.22	14.21	14.21	14.22	0.61				0.59	0.6	0.5	0.55	0.62	0.55
98		Hexaethylene glycol [M+H]+ C12H26O7 NIST 1186834---Hexaethylene glycol [M+H]+ C12H26O7 NIST 1186835	M+H 1+	283.175				208.1	188.7		181.8	187.9		157.7				6.62	6.62		6.63	6.62		6.62				0.52	0.52		0.55	0.53		0.56
99	*	Guanosine [M+H]+ C10H13N5O5 NIST 1070281	M+H 1+	284.098	99.7	67.9	125.3	99.7	147.2	25.9			80.3	45.1	3.27	3.26	3.27	3.27	3.28	3.26			3.27	3.28	0.99	0.98	0.99	0.99	0.99	0.97			0.99	0.98
99	*	ISF of Guanosine [M+H]+ C10H13N5O5 NIST 1070281	-	152.056	137	98.6	176.8	134.6	208.9	39.2			115.9	67.4	3.27	3.26	3.27	3.27	3.28	3.26			3.27	3.28	0.92	0.89	0.9	0.85	0.91	0.86			0.88	0.9
100		Xanthosine [M+H]+ C10H12N4O6 NIST 1075476---Xanthosine [M+H]+ C10H12N4O6 NIST 1075478---Xanthosine [M+H]+ C10H12N4O6 NIST 1075483	M+H 1+	285.083	167.1	208.6	178.5	157.6	238.5	19.3	25.7		64.8	93.7	1.45	1.45	1.44	1.44	1.44	1.45	1.46		1.45	1.45	0.88	0.89	0.86	0.8	0.86	0.68	0.75		0.75	0.85
101		Piperine C17H19NO3---Piperine [M+H]+ C17H19NO3 NIST 1228808	M+H 1+	286.143			203.2	139.3	148.1	39.7							11.7	11.69	11.69	11.69							0.96	0.96	0.95	0.93
102		Lauroyl diethanolamide C16H33NO3 MoNA 452429---Lauryl diethanolamide C16H33NO3	M+H 1+	288.253	37.2	44	30.1	43.9	36.6	41.4	41.9	38.9	41.7	384.1	12.58	12.58	12.57	12.58	12.58	12.58	12.57	12.58	12.57	12.58	0.77	0.81	0.81	0.84	0.74	0.75	0.82	0.76	0.86	0.97
103		C17-Sphinganine C17H37NO2	M+H 1+	288.289	507.2	404	305.1	274.8	169	837.1	1218.8	313.9		402.2	12.74	12.75	12.73	12.74	12.72	12.75	12.74	12.73		12.74	0.63	0.56	0.69	0.71	0.7	0.76	0.8	0.57		0.7
104	*	Adenosine, 5'-S-methyl-5'-thio- [M+H]+ C11H15N5O3S NIST 1061258	M+H 1+	298.094									758.2										7.03										0.7
104	*	ISF of Adenosine, 5'-S-methyl-5'-thio- [M+H]+ C11H15N5O3S NIST 1061258	-	136.061									24.6										7.03										0.9
105		Hexaethylene glycol [M+H]+ C12H26O7 NIST 1186832---Hexaethylene glycol [M+H]+ C12H26O7 NIST 1186833	M+NH4 1+	300.201	52.8	68.4	51.7	64.4	57.1	52.9	55.7	55.1	49.1	48.1	6.62	6.63	6.62	6.62	6.62	6.63	6.63	6.62	6.63	6.62	0.68	0.7	0.66	0.7	0.66	0.72	0.7	0.73	0.7	0.69
106	*	Epigallocatechin C15H14O7	M+H 1+	307.083	1367.7	1136.3			1950		789.7	324.9		734.3	0.97	0.97			1.06		0.96	0.96		0.98	0.93	0.86			0.86		0.9	0.89		0.86
106	*	Glutathione, oxidized [M+2H]2+ C20H32N6O12S2 NIST 1063350---Glutathione, oxidized [M+2H]2+ C20H32N6O12S2 NIST 1063351	M+2H 2+	307.083			1028.7	1697.5		675.2							1.01	1.06		0.97							0.91	0.92		0.91
106	*	ISF of Glutathione, oxidized [M+2H]2+ C20H32N6O12S2 NIST 1063350---Glutathione, oxidized [M+2H]2+ C20H32N6O12S2 NIST 1063351	-	130.049	673.2	667.6				527.2	444.9	823.1		608.9	0.95	0.95				0.95	0.96	0.96		0.95	0.89	0.8				0.83	0.86	0.94		0.9
107	*	Glutathione (reduced) C10H17N3O6S	M+H 1+	308.091					687.9	2751.4	2747.2	865.9	13150.8	5597.9					1.01	1.08	1.08	1.09	1.07	1.08					0.97	0.98	0.98	0.99	0.98	0.98
107	*	ISF of Glutathione (reduced) C10H17N3O6S	-	179.048									1207.7	513.2									1.07	1.08									0.71	0.52
108		Phytol,mixture of isomers; LC-ESI-QTOF; MS2; CE C20H40O	M+NH4 1+	314.341	53	49.7	56.8	52	57	53.2	50.4	53.2	50	53.9	14.04	14.03	14.05	14.04	14.04	14.04	14.05	14.03	14.03	14.05	0.9	0.87	0.88	0.86	0.89	0.89	0.89	0.89	0.87	0.88
109		D-myo-Inositol-1,2-diphosphate [M+H]+ C6H14O12P2 NIST 1131072---D-myo-Inositol-1,4-diphosphate [M+H]+ C6H14O12P2 NIST 1130975	M-H2O+H 1+	322.992								41.6	42									0.9	0.91									0.55	0.54
110		Uridine 5'-monophosphate [M+H]+ C9H13N2O9P NIST 1173721	M+H 1+	325.043						135.1										0.99										0.95
111		.beta.-D-Glucopyranose, 1,6-anhydro- [M+H]+ C6H10O5 NIST 1070756	2M+H 1+	325.113							364.5										1.08										0.54
111		.beta.-Gentiobiose [M+H-H2O]+ C12H22O11 NIST 1076385---D-Turanose [M+H-H2O]+ C12H22O11 NIST 1076204---D-Turanose [M+H-H2O]+ C12H22O11 NIST 1076207---Lactulose [M+H-H2O]+ C12H22O11 NIST 1076109---Maltose [M+H-H2O]+ C12H22O11 NIST 1070568---Sucrose [M+H-H2O]+ C12H22O11 NIST 1069673	M-H2O+H 1+	325.112		1245	807.1	610.8	712.9			213	234.4	360.5		1.08	1.07	1.09	1.07			1.09	1.09	1.08		0.83	0.57	0.64	0.62			0.69	0.77	0.61
112		N-Glycolylneuraminic acid [M+H]+ C11H19NO10 NIST 1060159---N-Glycolylneuraminic acid [M+H]+ C11H19NO10 NIST 1060161	M+H 1+	326.108									89.9	57.3									0.95	0.93									0.75	0.71
113		Tris(1-chloro-2-propyl)phosphate C9H18Cl3O4P	M+H 1+	327.008	294.8	280.4	259	270.6	281.5	284.2	278.3	282.2		271.9	11.57	11.56	11.55	11.56	11.55	11.55	11.55	11.55		11.56	0.94	0.94	0.95	0.94	0.94	0.95	0.95	0.96		0.95
114	*	1-Hexadecanoyl-sn-glycerol [M+H]+ C19H38O4 NIST 1060661---1-Hexadecanoyl-sn-glycerol [M+H]+ C19H38O4 NIST 1060662---1-Hexadecanoyl-sn-glycerol [M+H]+ C19H38O4 NIST 1060664---1-Hexadecanoyl-sn-glycerol [M+H]+ C19H38O4 NIST 1060665---2-Palmitoylglycerol C19H38O4	M+H 1+	331.284	233.3		221.1	213.1	209.1	206.8	191.4	229.6	205.3	201.9	14.26		14.25	14.26	14.26	14.26	14.26	14.25	14.25	14.25	0.81		0.84	0.77	0.78	0.71	0.82	0.89	0.85	0.75
114	*	ISF of 1-Hexadecanoyl-sn-glycerol [M+H]+ C19H38O4 NIST 1060665---1-Hexadecanoyl-sn-glycerol [M+H]+ C19H38O4 NIST 1060661---1-Hexadecanoyl-sn-glycerol [M+H]+ C19H38O4 NIST 1060662---1-Hexadecanoyl-sn-glycerol [M+H]+ C19H38O4 NIST 1060664---2-Palmitoylglycerol C19H38O4	-	313.273	287.5		277.3	372.9	274.2	245.3	268.6	279.9	260.3	241.6	14.26		14.25	14.24	14.26	14.26	14.26	14.25	14.25	14.25	0.62		0.68	0.62	0.75	0.6	0.8	0.73	0.72	0.71
115		13-Docosenamide, (Z)- [M+H]+ C22H43NO NIST 1152868---13-Docosenamide, (Z)- [M+H]+ C22H43NO NIST 1152869---Erucamide C22H43NO	M+H 1+	338.341	1254.8	848.5	967	819.6	774.3	901.5	814.1	738.7	1060.2	776.3	14.43	14.43	14.42	14.43	14.43	14.43	14.44	14.43	14.43	14.42	0.81	0.73	0.89	0.73	0.7	0.77	0.82	0.8	0.8	0.74
116		Monoelaidin [M+H-H2O]+ C21H40O4 NIST 1193260---Monoelaidin [M+H-H2O]+ C21H40O4 NIST 1193262	M-H2O+H 1+	339.289					494.5					251.7					14.43					14.36					0.59					0.6
117		Galabiose C12H22O11 unknown 1218239	M+H 1+	343.123							49.5										1.1										0.52
118		Lauroyl L-carnitine [2M+H]+ C19H37NO4 NIST 1152334	M+H 1+	344.283			52.7										12.06										0.6
119		THIAMINE MONOPHOSPHATE C12H17N4O4PS---Thiamine monophosphate [M+H]+ C12H17N4O4PS NIST 1056000	M+H 1+	345.077	27.8		30.1	49.3	91.9				69.9		2.23		2.17	2.22	2.24				2.21		0.78		0.89	0.88	0.92				0.86
120	*	Adenosine-3-monophosphate C10H14N5O7P	M+H 1+	348.07	4368.9	3725.7	7022.7	7160.5	9795	4287.7	3112.4	2276.5	13037.8	7330.4	1.32	1.33	1.32	1.32	1.32	1.32	1.33	1.33	1.32	1.33	0.99	0.99	1	1	1	0.99	1	1	1	0.99
120	*	ISF of Adenosine-3-monophosphate C10H14N5O7P	-	136.061	137.1	117.7	210.5	230	294.2	136.4	100.6		366.5	203.8	1.34	1.33	1.32	1.32	1.32	1.32	1.33		1.32	1.33	0.84	0.83	0.81	0.79	0.85	0.83	0.79		0.83	0.72
121	*	ISF of Inosine 5'-monophosphate [M+H]+ C10H13N4O8P NIST 1178848---Inosine-5'-monophosphate; LC-ESI-QTOF; MS2; CE C10H13N4O8P---Inosine 5'-monophosphate [M+H]+ C10H13N4O8P NIST 1062677---Inosine 5'-monophosphate [M+H]+ C10H13N4O8P NIST 1178843	-	137.045	102.7							1176.6			1.09							1.11			0.82							0.89
121	*	Inosine 5'-monophosphate [M+H]+ C10H13N4O8P NIST 1062677---Inosine 5'-monophosphate [M+H]+ C10H13N4O8P NIST 1178843---Inosine 5'-monophosphate [M+H]+ C10H13N4O8P NIST 1178848---Inosine-5'-monophosphate; LC-ESI-QTOF; MS2; CE C10H13N4O8P	M+H 1+	349.054	138.8		113.4		261.6	78.5		1519.6		125.5	1.09		1.09		1.09	1.1		1.11		1.1	0.98		0.96		0.98	0.98		0.99		0.98
122		Monoelaidin [M+H-H2O]+ C21H40O4 NIST 1193257---Monoelaidin [M+H]+ C21H40O4 NIST 1193236---Monoelaidin [M+H]+ C21H40O4 NIST 1193237---Monoelaidin [M+H]+ C21H40O4 NIST 1193238	M+H 1+	357.299	269.6				207.7	221.2			236.4	180.1	14.39				14.37	14.37			14.36	14.36	0.56				0.58	0.63			0.66	0.58
123	*	Glycerol 1-stearate [M+H]+ C21H42O4 NIST 1060650---Hexadecylacetylglycerol [M+H-H2O]+ C21H42O4 NIST 1219303	M+H 1+	359.315		281.7	285.8	289.3	263.3				280.5	271.7		12.92	12.92	12.91	12.9				12.92	12.91		0.66	0.59	0.5	0.51				0.56	0.57
123	*	ISF of Hexadecylacetylglycerol [M+H-H2O]+ C21H42O4 NIST 1219303---Glycerol 1-stearate [M+H]+ C21H42O4 NIST 1060650	-	341.305				208.8						200.3				12.93						12.93				0.75						0.58
124		.beta.-Gentiobiose [2M+H]+ C12H22O11 NIST 1076381---.beta.-Gentiobiose [M+H-H2O]+ C12H22O11 NIST 1076370---Maltose [M+H-H2O]+ C12H22O11 NIST 1070569	M+NH4 1+	360.15	554	1383.6	684.6	523.1	627.8		392				1.07	1.08	1.07	1.07	1.07		1.08				0.98	0.98	0.99	0.97	0.98		0.97
125	*	ISF of Octocrylene C24H27NO2	-	250.086							41.6										13.76										0.9
125	*	Octocrylene C24H27NO2	M+H 1+	362.211							26.5										13.76										0.59
126	*	Guanosine 5'-monophosphate [M+H]+ C10H14N5O8P NIST 1055921---Guanosine monophosphate C10H14N5O8P MassBank 5251	M+H 1+	364.065	364.9	275.7	586	647.1	826.2	281	259.1		973.3	486	1.09	1.1	1.09	1.09	1.09	1.08	1.08		1.09	1.08	0.96	0.96	0.97	0.98	0.98	0.95	0.96		0.96	0.97
126	*	ISF of Guanosine monophosphate C10H14N5O8P MassBank 5251---Guanosine 5'-monophosphate [M+H]+ C10H14N5O8P NIST 1055921	-	152.056			112.3	133	165.6				199.2	98			1.09	1.09	1.09				1.09	1.08			0.9	0.81	0.9				0.89	0.78
127		Sucrose [M+Na]+ C12H22O11 NIST 1069681---Sucrose [M+Na]+ C12H22O11 NIST 1069693---Sucrose [M+Na]+ C12H22O11 NIST 1069694	M+Na 1+	365.105			389.1	372.5	323	102.4							1.07	1.09	1.09	1.1							0.66	0.73	0.83	0.83
128		Octocrylene C24H27NO2	M+NH4 1+	379.238						30.2			27.9							13.76			13.76							0.93			0.92
129		S-(5'-Adenosyl)-L-homocysteine [M+H]+ C14H20N6O5S NIST 1069087---S-(5'-Adenosyl)-L-homocysteine [M+H]+ C14H20N6O5S NIST 1069098---S-(5'-Adenosyl)-L-homocysteine [M+H]+ C14H20N6O5S NIST 1069100---S-Adenosyl-homocysteine C14H20N6O5S	M+H 1+	385.128	187.2	124.8	182.5	151.8	272.6	61.4	76.7	20.6	245.3	116.3	4.29	4.29	4.3	4.29	4.29	4.29	4.29	4.3	4.28	4.29	0.99	0.98	0.98	0.99	0.98	0.97	0.98	0.96	0.98	0.98
130		Hexanedioic acid, bis(2-ethylhexyl) ester [M+H]+ C22H42O4 NIST 1152990	M+NH4 1+	388.341	84	98.6	99.1	79.4			103.2	84.4		98	14.76	14.75	14.75	14.74			14.74	14.75		14.75	0.8	0.86	0.84	0.86			0.85	0.81		0.81
131		Hexanedioic acid, bis(2-ethylhexyl) ester [M+H]+ C22H42O4 NIST 1152989---Hexanedioic acid, bis(2-ethylhexyl) ester [M+H]+ C22H42O4 NIST 1152991	M+NH4 1+	388.341						97.7			96.4							14.74			14.75							0.86			0.75
132	*	Dioctyl Phthalate C24H38O4	M+H 1+	391.284	22705.5	23159.6	22791.5	23386.6	22650	22812.7	21941.7	22437.6	22452.7	22653.1	13.67	13.67	13.67	13.68	13.68	13.68	13.68	13.67	13.67	13.66	0.97	0.97	0.97	0.97	0.97	0.97	0.97	0.97	0.97	0.97
132	*	ISF of Dioctyl Phthalate C24H38O4	-	149.023	4352.6	4463.2	4417.4	4438.7	4310.6	4344	4173.8	4311	4246	4275.1	13.67	13.67	13.67	13.66	13.68	13.68	13.66	13.67	13.67	13.66	0.81	0.8	0.8	0.8	0.8	0.81	0.8	0.78	0.79	0.8
133	*	ISF of S-Adenosyl-methionine C15H22N6O5S---S-Adenosyl-L-methionine C15H22N6O5S	-	250.093					47.3										1.52										0.8
133	*	S-(5'-Adenosyl)-L-methionine cation [Cat]+ C15H23N6O5S NIST 1065180---S-(5'-Adenosyl)-L-methionine cation [Cat]+ C15H23N6O5S NIST 1065182	M 1+	399.144	156.8	127.2			376.7	107.3	120.1	49.8	435.9	227.7	1.52	1.52			1.52	1.53	1.54	1.52	1.52	1.53	0.96	0.94			0.97	0.96	0.96	0.95	0.97	0.96
133	*	S-Adenosyl-L-methionine C15H22N6O5S---S-Adenosyl-methionine C15H22N6O5S	M+H 1+	399.144			282.1	251.9									1.53	1.53									0.97	0.97
134		Tris(2-butoxyethyl) phosphate [M+H]+ C18H39O7P NIST 1147565---Tris(2-butoxyethyl) phosphate [M+H]+ C18H39O7P NIST 1147578	M+H 1+	399.25	138.5	573.9	137.6	132.7	134.8	142.2	141.3	121.6	127.7	131.3	13.15	13.12	13.14	13.14	13.15	13.15	13.15	13.15	13.14	13.14	0.55	0.81	0.52	0.7	0.6	0.63	0.54	0.62	0.64	0.63
135		5.alpha.-Hydroxy-6-ketocholesterol [M+H]+ C27H46O3 NIST 1216304---5.alpha.-Hydroxy-6-ketocholesterol [M+H]+ C27H46O3 NIST 1216316	M-H2O+H 1+	401.342		81			72.2					72.1		14.01			14.02					14.01		0.57			0.66					0.54
136		Azoxystrobin C22H17N3O5---Pesticide4_Azoxystrobin_C22H17N3O5_Methyl (2E)-2-(2-{[6-(2-cyanophenoxy)pyrimidin-4-yl]oxy}phenyl)-3-methoxyprop-2-enoate C22H17N3O5	M+H 1+	404.123			207.6	141.3	255.2	129.6							11.43	11.43	11.42	11.43							0.94	0.9	0.95	0.9
137		Uridine 5_-(trihydrogen diphosphate) C9H14N2O12P2	M+H 1+	405.009									328.8										0.95										0.92
138		Acetyl-DL-carnitine [2M+H]+ C9H17NO4 NIST 1064380	2M+H 1+	407.238							8.5	28.3	103.8								1.18	1.17	1.16								0.9	0.99	0.98
139		Dioctyl phthalate [M+H]+ C24H38O4 NIST 1153066	M+NH4 1+	408.311				38.5										13.66										0.9
140		Diisooctyl phthalate [M+Na]+ C24H38O4 NIST 1152934---Dioctyl phthalate [M+Na]+ C24H38O4 NIST 1153083---Dioctyl phthalate [M+Na]+ C24H38O4 NIST 1153084---Dioctyl phthalate [M+Na]+ C24H38O4 NIST 1153089	M+Na 1+	413.266	2800.4		2944.4	2981.7	2672.2	2904	2448.8		2620.2	2499.2	13.67		13.67	13.66	13.68	13.68	13.68		13.67	13.66	0.88		0.94	0.91	0.91	0.88	0.89		0.92	0.91
141		NCGC00347704-02_C24H32O7_2H-Oxireno[1,10a]phenanthro[3,2-b]furan-10(11bH)-one, 5,7-bis(acetyloxy)-3,3a,4,5,6,7,7a,7b,8,8a-decahydro-4,4,7a,11-tetramethyl-, (1aS,3aR,5S,7S,7aR,7bS,8aR,11bR)- C24H32O7	M-H2O+H 1+	415.211	423.4	442.1	434.6	448.8	375.2	406.2	384	419.6	424.1	372.9	12.05	12.06	12.06	12.06	12.04	12.05	12.05	12.05	12.06	12.06	0.93	0.89	0.9	0.93	0.87	0.91	0.93	0.94	0.88	0.86
142		Decanedioic acid, bis(2-ethylhexyl) ester [M+H]+ C26H50O4 NIST 1152966---Decanedioic acid, bis(2-ethylhexyl) ester [M+H]+ C26H50O4 NIST 1152967---Dioctyl sebacate [M+H]+ C26H50O4 NIST 1186612	M+H 1+	427.378	274.7	286.7	269.6	274.9	287.3	312.9	306.6	272.7	314.3	279.1	13.69	13.71	13.71	13.7	13.72	13.72	13.72	13.71	13.71	13.7	0.8	0.9	0.78	0.84	0.78	0.82	0.82	0.79	0.89	0.85
143		Adenosine 5'-diphosphate [M+H]+ C10H15N5O10P2 NIST 1161608	M+H 1+	428.036									1359.2										1.16										0.98
144		NCGC00169629-02_C27H28N2O4_Benzenepropanamide, N-[2-(acetyloxy)-1-(phenylmethyl)ethyl]-alpha-(benzoylamino)- C27H28N2O4	M+H 1+	445.211			71.9	43.7	91.4								11.81	11.81	11.82								0.69	0.55	0.71
145		Diisodecyl phthalate [M+H]+ C28H46O4 NIST 1153102---Diisodecyl phthalate [M+H]+ C28H46O4 NIST 1153103---Diisodecyl phthalate [M+H]+ C28H46O4 NIST 1153107	M+H 1+	447.346		329.3	324.4	380.7	382.3	325	327.1	331.7	326.7	321.9		13.84	13.84	13.85	13.85	13.82	13.83	13.84	13.84	13.83		0.57	0.63	0.64	0.59	0.59	0.51	0.59	0.68	0.56
146		Flavine mononucleotide [M+H-H2O]+ C17H21N4O9P NIST 1171370---Flavine mononucleotide [M+H]+ C17H21N4O9P NIST 1171350---Flavine mononucleotide [M+H]+ C17H21N4O9P NIST 1171351	M+H 1+	457.11		12.8	13	14.9	21.7				47.4	14.3		6.59	6.59	6.59	6.6				6.58	6.6		0.88	0.87	0.88	0.86				0.89	0.9
147		NCGC00386050-01!(2S,3S,4S,5R,6S)-3,4,5-trihydroxy-6-[5-hydroxy-6-methoxy-2-(4-methoxyphenyl)-4-oxochromen-7-yl]oxyoxane-2-carboxylic acid C23H22O12	M-H2O+H 1+	473.102	146.7	143	152.6	133.6	139.2	150.9	136.3	147.4	137.5	126.1	14.65	14.64	14.64	14.63	14.65	14.65	14.63	14.64	14.64	14.64	0.68	0.86	0.62	0.76	0.9	0.71	0.82	0.74	0.78	0.74
148		NCGC00380283-01!4-[5-[[4-[5-[acetyl(hydroxy)amino]pentylamino]-4-oxobutanoyl]-hydroxyamino]pentylamino]-4-oxobutanoic acid C20H36N4O8	M+NH4 1+	478.292		28.2			35.9							13.33			13.32							0.53			0.73
149		1-Octadecanoyl-sn-glycero-3-phosphoethanolamine [M+H]+ C23H48NO7P NIST 1035449---1-Stearoyl-2-hydroxy-sn-glycero-3-phosphoethanolamine [M+H]+ C23H48NO7P NIST 1151439	M+H 1+	482.327				74.1	63.7		62.1							14.2	14.24		14.22							0.78	0.62		0.78
150		1-Hexadecyl-sn-glycero-3-phosphocholine [M+H]+ C24H52NO6P NIST 1105204---1-Hexadecyl-sn-glycero-3-phosphocholine [M+H]+ C24H52NO6P NIST 1105205---1-Hexadecyl-sn-glycero-3-phosphocholine [M+H]+ C24H52NO6P NIST 1105208	M+H 1+	482.36			70.6				58.8	63.2	53	63			13.94				13.94	13.95	13.95	13.94			0.61				0.69	0.69	0.62	0.68
151		3.alpha.,6.alpha.-Mannotriose [M+H]+ C18H32O16 NIST 1061270---Maltotriose [M+H-H2O]+ C18H32O16 NIST 1076122	M-H2O+H 1+	487.165			177.6	168.8	152.3	102.7							1.11	1.11	1.11	1.12							0.79	0.88	0.65	0.74
152		LPC 16:1; [M+H]+ C24H48NO7P---lysoPC 16:1; [M+H]+; PC(16:1(7Z)/0:0) C24H48NO7P---lysoPC 16:1; [M+H]+; PC(16:1(9Z)/0:0) C24H48NO7P	M+H 1+	494.323	99.8	245.4	97.6	86.9	216.5	19.5	22.9		15.7	21.9	13.19	13.08	13.1	13.2	13.13	13.22	13.22		13.24	13.25	0.9	0.92	0.69	0.92	0.92	0.83	0.7		0.77	0.79
153		1-Hexadecanoyl-sn-glycero-3-phosphocholine [M+H]+ C24H50NO7P NIST 1035306---Lyso-PC(16:0) [M+H]+ C24H50NO7P NIST 1115234---Lyso-PC(16:0) [M+H]+ C24H50NO7P NIST 1115238---Lyso-PC(16:0) [M+H]+ C24H50NO7P NIST 1115239---Lyso-PC(16:0) [M+H]+ C24H50NO7P NIST 1115242---LysoPhosphatidylcholine_16_0 C24H50NO7P	M+H 1+	496.339	503.2	457.7	413.3	420.9	478.2			378.7	382.1	396.3	13.67	13.67	13.67	13.66	13.68			13.67	13.67	13.66	0.95	0.96	0.95	0.92	0.96			0.97	0.94	0.96
154		Tauroursodeoxycholic acid [M+H]+ C26H45NO6S NIST 1074743	M+H 1+	500.302			12.1						18.1	23.6			11.72						10.52	11.69			0.6						0.7	0.83
155	*	ISF of Tauroursodeoxycholic acid [M+H]+ C26H45NO6S NIST 1074742	-	464.282									21										11.7										0.9
155	*	Tauroursodeoxycholic acid [M+H]+ C26H45NO6S NIST 1074742	M+H 1+	500.303		17.9							62.7			11.7							11.7			0.84							0.94
156	*	ISF of Taurocholate; LC-ESI-QTOF; MS2; CE C26H45NO7S---Taurocholic acid [M+H]+ C26H45NO7S NIST 1076875---Taurocholic acid [M+H]+ C26H45NO7S NIST 1076873	-	462.266	123		26.8	55.7	54.6			137.1	95.7	51	10.9		10.88	10.91	10.91			10.91	10.89	10.91	0.86		0.9	0.91	0.9			0.96	0.93	0.87
156	*	ISF of Taurocholate; LC-ESI-QTOF; MS2; CE C26H45NO7S---Taurocholic acid [M+H]+ C26H45NO7S NIST 1076875---Taurocholic acid [M+H]+ C26H45NO7S NIST 1076873	-	498.288	148.9									64.4	10.92									10.91	0.96									0.91
156	*	ISF of Taurocholate; LC-ESI-QTOF; MS2; CE C26H45NO7S---Taurocholic acid [M+H]+ C26H45NO7S NIST 1076875---Taurocholic acid [M+H]+ C26H45NO7S NIST 1076873	-	480.277	133.3	24.1		59.9	65.7			150	102.1		10.92	10.9		10.91	10.91			10.91	10.91		0.94	0.89		0.93	0.9			0.98	0.94
156	*	Taurocholate; LC-ESI-QTOF; MS2; CE C26H45NO7S---Taurocholic acid [M+H]+ C26H45NO7S NIST 1076873---Taurocholic acid [M+H]+ C26H45NO7S NIST 1076875	M+H 1+	516.298	216.6	120.1,39.2	63.8	102.6	101.6	26.3	27.7	263.5,31.5	171.2	92.7	10.92	9.86,10.90	10.91	10.91	10.91	10.91	10.9	10.91,9.64	10.91	10.91	0.95	0.87,0.90	0.93	0.96	0.92	0.8	0.86	0.95,0.97	0.93	0.92
157	*	ISF of Taurocholic acid [M+H]+ C26H45NO7S NIST 1076874	-	480.277	458.5	88.3	169.4	185.2		39	36.1	382.7	243.6	155	9.87	9.88	9.89	9.88		9.88	9.89	9.87	9.88	9.88	0.98	0.96	0.95	0.93		0.95	0.94	0.94	0.92	0.94
157	*	ISF of Taurocholic acid [M+H]+ C26H45NO7S NIST 1076874	-	498.287			81.4	84.5					125.9				9.89	9.88					9.9				0.9	0.91					0.91
157	*	ISF of Taurocholic acid [M+H]+ C26H45NO7S NIST 1076874	-	462.266	75										9.87										0.74
157	*	Taurocholic acid [M+H]+ C26H45NO7S NIST 1076874	M+H 1+	516.298	620.9		233.6	241		47.6	49.5	501	304.6	228.8	9.87		9.89	9.86		9.88	9.89	9.87	9.88	9.88	0.76		0.83	0.88		0.78	0.77	0.82	0.81	0.79
158		Tauroursodeoxycholic acid [M+H]+ C26H45NO6S NIST 1074742---Tauroursodeoxycholic acid [M+H]+ C26H45NO6S NIST 1074743	M+NH4 1+	517.33					18.4			16.1	29.4	7.1					11.55			10.54	11.53	10.06					0.91			0.94	0.96	0.91
159		LPC 18:3; [M+H]+ C26H48NO7P	M+H 1+	518.323		196.7	45.6		154							13	12.98		12.99							0.92	0.91		0.93
160		LPC 18:3; PlaSMA ID-2742 C26H48NO7P---Unknown (carbon number 26); PlaSMA ID-2741 C26H48NO7P	M+H 1+	518.324	20.2	492.3		24.1	149.4						11.95	11.98		11.96	11.94						0.6	0.88		0.6	0.87
161		LPC 18:2; PlaSMA ID-2753 C26H50NO7P---LPC 18:2; PlaSMA ID-2754 C26H50NO7P---LPC 18:2; [M+H]+ C26H50NO7P---PC 18:2e; PC 16:2e/2:0; [M+H]+ C26H50NO7P---Unknown (carbon number 26); PlaSMA ID-2755 C26H50NO7P	M+H 1+	520.338	569.6	2228.9	448.1	325.8	2621.3	141.4	139.3	112.2	95.8	116.9	13.29	13.29	13.29	13.28	13.3	13.32	13.32	13.33	13.31	13.32	0.91	0.95	0.96	0.92	0.95	0.9	0.72	0.88	0.88	0.87
162		3.alpha.,6.alpha.-Mannotriose [M+H]+ C18H32O16 NIST 1061267---D-(+)-Raffinose [M+H-H2O]+ C18H32O16 NIST 1076224	M+NH4 1+	522.201		274					52.1					1.16					1.3					0.91					0.54
163		Maltotriose [M+H-H2O]+ C18H32O16 NIST 1070355---Maltotriose [M+H]+ C18H32O16 NIST 1076112---Maltotriose [M+H]+ C18H32O16 NIST 1076113	M+NH4 1+	522.202	190.5		392.1	344.3	299.4	192.9	118.9	238	350.5	371.6	1.11		1.11	1.11	1.11	1.12	1.12	1.11	1.12	1.12	0.91		0.95	0.96	0.95	0.93	0.87	0.95	0.95	0.97
164		1-(9Z-Octadecenoyl)-sn-glycero-3-phosphocholine [M+H]+ C26H52NO7P NIST 1149843---1-(9Z-Octadecenoyl)-sn-glycero-3-phosphocholine [M+H]+ C26H52NO7P NIST 1149847---1-(9Z-Octadecenoyl)-sn-glycero-3-phosphocholine [M+H]+ C26H52NO7P NIST 1149848---LPC 18:1; [M+H]+ C26H52NO7P---lysoPC 18:1; [M+H]+; PC(18:1(11E)/0:0) C26H52NO7P---lysoPC 18:1; [M+H]+; PC(18:1(11Z)/0:0) C26H52NO7P---lysoPC 18:1; [M+H]+; P…	M+H 1+	522.355			98	103.3	149.4	89.1		77		84.9			13.75	13.76	13.74	13.78		13.77		13.77			0.88	0.79	0.79	0.85		0.82		0.8
165		1-Stearoyl-2-hydroxy-sn-glycero-3-phosphocholine [M+H]+ C26H54NO7P NIST 1151093---1-Stearoyl-2-hydroxy-sn-glycero-3-phosphocholine [M+H]+ C26H54NO7P NIST 1151095---lysoPC 18:0; [M+H]+; PC(18:0/0:0) C26H54NO7P	M+H 1+	524.37	324.9	297.3	301.8	303	291	294.7	291.1	298.2	276.8	287	14.21	14.21	14.21	14.22	14.22	14.21	14.22	14.21	14.21	14.2	0.96	0.96	0.96	0.94	0.92	0.96	0.94	0.96	0.84	0.97
166		Taurocholic acid [M+H]+ C26H45NO7S NIST 1076874	M+NH4 1+	533.324	854.9	172.8		359.2	347.6,419.8		82.5,132.9	38.3	791.5		9.89	9.88		9.88	9.89,10.91		9.89,10.90	9.66	10.89		0.89	0.89		0.9	0.89,0.98		0.89,0.97	0.94	0.98
167		Taurocholic acid [M+H]+ C26H45NO7S NIST 1076873	M+NH4 1+	533.324	889.5	150.9	279.2	436.7		85.8,118.8		743.1,1152.9		335.7,422.4	10.9	10.9	10.91	10.91		9.90,10.91		9.89,10.91		9.90,10.91	0.97	0.98	0.97	0.96		0.88,0.95		0.88,0.98		0.89,0.97
168		Taurocholic acid [M+Na]+ C26H45NO7S NIST 1076888---Taurocholic acid [M+Na]+ C26H45NO7S NIST 1076891	M+Na 1+	538.279	70.2							87.2	56.3		10.9							10.91	10.89		0.62							0.68	0.55
169		lysoPC 20:5; [M+H]+; PC(20:5(5Z,8Z,11Z,14Z,17Z)/0:0) C28H48NO7P	M+H 1+	542.323		135										12.15										0.5
170		LPC 20:5; [M+H]+ C28H48NO7P	M+H 1+	542.323	22	81.3			83.5						12.93	12.94			12.92						0.77	0.87			0.9
171		LPC 20:4; [M+H]+ C28H50NO7P---lysoPC 20:4; [M+H]+; PC(20:4(5E,8E,11E,14E)/0:0) C28H50NO7P---lysoPC 20:4; [M+H]+; PC(20:4(5Z,8Z,11Z,14Z)/0:0) C28H50NO7P---lysoPC 20:4; [M+H]+; PC(20:4(7E,10E,13E,16E)/0:0) C28H50NO7P	M+H 1+	544.339	221.6	737.1	207.2	182	1079.7	33.7		31.2			13.27	13.27	13.27	13.26	13.28	13.27		13.27			0.92	0.92	0.93	0.91	0.91	0.91		0.88
172		2-Thio PAF [M+H]+ C26H54NO6PS NIST 1112224	M+Li 1+	546.354					69.9										13.51										0.86
172		LPC 20:3; [M+H]+ C28H52NO7P	M+H 1+	546.354		66.7										13.5										0.89
173		PC 18:1; [M+Na]+; GPCho(16:1(7Z)/2:0) C26H50NO8P---PC 18:1; [M+Na]+; GPCho(16:1(9Z)/2:0) C26H50NO8P---PC 18:1; [M+Na]+; GPCho(2:0/16:1(7Z)) C26H50NO8P---PC 18:1; [M+Na]+; GPCho(2:0/16:1(9Z)) C26H50NO8P	M+Na 1+	558.316		212.7			38.4							11.98			11.94							0.81			0.7
174		Nonapropylene glycol [M+H]+ C27H56O10 NIST 1110836	M+NH4 1+	558.429			186.9										14.42										0.71
175	*	Adenosine 5'-diphosphoribose [M+H]+ C15H23N5O14P2 NIST 1068203---Adenosine 5'-diphosphoribose [M+H]+ C15H23N5O14P2 NIST 1068204---Adenosine 5'-diphosphoribose [M+H]+ C15H23N5O14P2 NIST 1068205---Adenosine 5'-diphosphoribose [M+H]+ C15H23N5O14P2 NIST 1161394	M+H 1+	560.078	57.1	121.6	157.9	192.6	312.2	91.1	90	131.4	1155.4	297.1	1.2	1.2	1.22	1.22	1.22	1.2	1.21	1.21	1.2	1.2	0.97	0.97	0.96	0.98	0.96	0.97	0.94	0.95	0.98	0.98
175	*	ISF of Adenosine 5'-diphosphoribose [M+H]+ C15H23N5O14P2 NIST 1068203---Adenosine 5'-diphosphoribose [M+H]+ C15H23N5O14P2 NIST 1068205---Adenosine 5'-diphosphoribose [M+H]+ C15H23N5O14P2 NIST 1068204---Adenosine 5'-diphosphoribose [M+H]+ C15H23N5O14P2 NIST 1161394	-	428.036					288										1.22										0.95
176		Adenosine 5'-diphosphoribose [M+H]+ C15H23N5O14P2 NIST 1161392	M+H 1+	560.078			387.8	95.8	325.5	145.6	195.3		1354.8	435.4			0.94	0.95	0.94	0.95	0.96		0.95	0.95			0.55	0.56	0.5	0.57	0.51		0.55	0.56
177		LPC 22:6; [M+H]+ C30H50NO7P	M+H 1+	568.339	59.7	206	44.6	34.2	243						13.23	13.23	13.23	13.22	13.21						0.9	0.93	0.88	0.94	0.92
178		Uridine-5-diphosphoacetylgalactosamine C17H27N3O17P2	M+H 1+	608.088					502.5				622.2						0.99				0.97						0.95				0.95
179		1-Palmitoyl-2-oleoyl-sn-glycerol [M+H]+ C37H70O5 NIST 1149340	M+NH4 1+	612.555			337.8			244.8	437.2		448.2	190.6			13.88			14.19	13.83		13.88	14.11			0.69			0.52	0.72		0.68	0.77
180	*	Glutathione (oxidized) C20H32N6O12S2	M+H 1+	613.159	3364.6	2768.4	2530.1	4153.4	5090.9	1516.9	1647.1	852.9	3049.4	1699.6	0.97	0.97	0.97	0.97	0.96	0.97	0.96	0.96	0.95	0.95	0.87	0.87	0.87	0.86	0.85	0.86	0.87	0.86	0.86	0.85
180	*	ISF of Glutathione (oxidized) C20H32N6O12S2	-	484.116	279			333.8	275.7		162.5		188.1		0.97			0.97	0.94		0.98		0.95		0.96			0.98	0.92		0.98		0.94
181		NCGC00385199-01!2-[3,4-bis[[(2S,3R,4S,5S,6R)-3,4,5-trihydroxy-6-(hydroxymethyl)oxan-2-yl]oxy]phenyl]-5,7-dihydroxychromen-4-one C27H30O16	M+NH4 1+	628.194		31.7	39.1	41.9		37.4	33.6	31	27.5	30.2		14.53	14.53	14.52		14.52	14.52	14.54	14.53	14.54		0.51	0.57	0.56		0.55	0.62	0.53	0.51	0.54
182		DAG 36:3; DAG 18:1-18:2; [M+NH4]+ C39H70O5	M+NH4 1+	636.555	321.9	767.7	239.2	250	750.1		1062.3	364.6	141.4	742.3	13.36	13.75	13.41	13.49	13.78		13.78	13.23	13.39	14.72	0.52	0.54	0.57	0.63	0.51		0.52	0.65	0.59	0.55
183		1-Stearoyl-2-linoleoyl-sn-glycerol [M+H]+ C39H72O5 NIST 1149397	M+NH4 1+	638.571	403	581.1	287.2		1321.6	650.9	4719.5			192.1	13.6	13.78	13.25		13.76	13.79	14.02			13.28	0.55	0.51	0.5		0.58	0.53	0.53			0.57
184		DAG 36:1; DAG 18:0-18:1; [M+NH4]+ C39H74O5	M+NH4 1+	640.585	186.2	918.6		578.8	49	401.3		452.8		3046.4,450.6	13.38	13.6		14.03	13.15	13.82		13.37		14.51,13.43	0.69	0.54		0.57	0.56	0.54		0.66		0.50,0.54
185		Maltotetraose [M+H-H2O]+ C24H42O21 NIST 1076171---Maltotetraose [M+H]+ C24H42O21 NIST 1070619---Maltotetraose [M+H]+ C24H42O21 NIST 1076164	M-H2O+H 1+	649.218								34.1	67.8	61.2								1.21	1.2	1.18								0.65	0.89	0.87
186	*	.beta.-Nicotinamide adenine dinucleotide [M+H]+ C21H27N7O14P2 NIST 1066928	M+H 1+	664.116	1332.2	260.2	2270.8	1748.9	3140.9	531	1232.6	2152.4	3372.5	1400	2.21	2.2	2.23	2.22	2.24	2.21	2.21	2.22	2.21	2.24	0.95	0.95	0.95	0.94	0.94	0.95	0.95	0.95	0.95	0.95
186	*	ISF of .beta.-Nicotinamide adenine dinucleotide [M+H]+ C21H27N7O14P2 NIST 1066928	-	524.057	78.6		142.7	107.8	197.6	30.2	71.6	126.2	200.6	84.3	2.21		2.23	2.22	2.24	2.21	2.21	2.22	2.21	2.24	0.94		0.92	0.85	0.94	0.68	0.94	0.81	0.95	0.92
186	*	ISF of .beta.-Nicotinamide adenine dinucleotide [M+H]+ C21H27N7O14P2 NIST 1066928	-	542.067	117.7		218.6	160	305	47.6	110.4	193.1	304.7	132.9	2.21		2.23	2.22	2.24	2.21	2.21	2.22	2.23	2.24	0.92		0.93	0.93	0.95	0.87	0.94	0.95	0.95	0.94
186	*	ISF of .beta.-Nicotinamide adenine dinucleotide [M+H]+ C21H27N7O14P2 NIST 1066928	-	428.036				71.3	130.6		47.9	87.5	170					2.22	2.24		2.21	2.22	2.21					0.94	0.81		0.96	0.85	0.88
187		.beta.-Nicotinamide adenine dinucleotide, reduced [M+H]+ C21H29N7O14P2 NIST 1161765	M+H 1+	666.131					68.1			22.5	70.4,424.9	21					3.72			3.71	4.14,3.68	3.73					0.87			0.83	0.85,0.88	0.88
188		Maltotetraose [M+H-H2O]+ C24H42O21 NIST 1070613---Maltotetraose [M+H]+ C24H42O21 NIST 1070609	M+H 1+	667.228				146.5	93.9	110.1	67.6		252.7	229.5				1.2	1.19	1.2	1.21		1.2	1.2				0.55	0.62	0.94	0.9		0.72	0.93
189		Maltotetraose [M+H]+ C24H42O21 NIST 1070607---Maltotetraose [M+H]+ C24H42O21 NIST 1070608---Maltotetraose [M+H]+ C24H42O21 NIST 1076165---Maltotetraose [M+H]+ C24H42O21 NIST 1076176	M+NH4 1+	684.254	74.9		204.4	285.1	191.3	205.8	128.4	287.7	457.4	394.1	1.2		1.2	1.2	1.19	1.2	1.19	1.19	1.2	1.18	0.74		0.83	0.88	0.83	0.87	0.81	0.89	0.95	0.9
190		3'-Dephospho coenzyme A [M+H]+ C21H35N7O13P2S NIST 1058275	M+H 1+	688.155									34.9										5.19										0.96
191		AMP; LC-ESI-QTOF; MS2; CE C10H14N5O7P---Adenosine 5'-monophosphate [M+H]+ C10H14N5O7P NIST 1161698	2M+H 1+	695.132	70	49.2	129.4	132.1	172	77.2	39.3		241.8	139.4	1.32	1.31	1.32	1.32	1.32	1.32	1.31		1.3	1.31	1	1	1	1	0.99	1	0.99		0.99	1
192		Inosine 5'-monophosphate [2M+H]+ C10H13N4O8P NIST 1062681	2M+H 1+	697.101								164.6										1.11										0.96
193		Coenzyme A [M+H]+ C21H36N7O16P3S NIST 1162122	M+H 1+	768.122									47										4.4										0.89
194	*	Flavin??adenine??dinucleotide C27H33N9O15P2	M+H 1+	786.164	19.2	23.7	56.9	75.4	165.1			25.9	496.4	35.8	6.16	6.14	6.15	6.13	6.14			6.13	6.14	6.13	0.97	0.97	0.98	0.98	0.98			0.98	0.98	0.98
194	*	ISF of Flavin??adenine??dinucleotide C27H33N9O15P2	-	439.101					38.6				117.8						6.14				6.14						0.75				0.86
194	*	ISF of Flavin??adenine??dinucleotide C27H33N9O15P2	-	348.07									100.5										6.14										0.62
195		acetyl CoA C23H38N7O17P3S	M+H 1+	810.132									57.3										5.11										0.85
196		Maltopentaose [M+H]+ C30H52O26 NIST 1076608---Maltopentaose [M+H]+ C30H52O26 NIST 1076609	M+H 1+	829.281				31.3		21.3			79.9	44.6				1.28		1.3			1.28	1.29				0.86		0.64			0.77	0.81
197		Maltopentaose [M+H]+ C30H52O26 NIST 1076608	M+NH4 1+	846.308				68.9	48.6	38.9		29.7	149.9	80.8				1.3	1.3	1.28		1.29	1.28	1.29				0.82	0.81	0.87		0.87	0.94	0.92
198		1-Octadecanoyl-2-(5Z,8Z,11Z,14Z-eicosatetraenoyl)-sn-glycero-3-phospho-(1'-myo-inositol) [M+H]+ C47H83O13P NIST 1148644	M+NH4 1+	904.589	53.1										14.73										0.74

## Sheet: MetaboKit-Pos-Org
group	ISF	name	adduct	feature_m/z	KO1	KO2	KO3	KO4	KO5	WT1	WT2	WT3	WT4	WT5	RT_KO1	RT_KO2	RT_KO3	RT_KO4	RT_KO5	RT_WT1	RT_WT2	RT_WT3	RT_WT4	RT_WT5	score_KO1	score_KO2	score_KO3	score_KO4	score_KO5	score_WT1	score_WT2	score_WT3	score_WT4	score_WT5
1		5-Aminovaleric acid [M+H]+ C5H11NO2 NIST 1059363	M-H2O+H 1+	100.075						34										0.29										0.5
2		Choline cation [Cat]+ C5H14NO NIST 1067856---Choline cation [Cat]+ C5H14NO NIST 1067857	M 1+	104.107	248.9	797.1	1025.2	661	1208.9	78	94.7	599.4	120.1	284.9	0.3	0.29	0.29	0.29	0.29	0.29	0.28	0.28	0.29	0.3	0.98	0.98	0.98	0.97	0.98	0.97	0.95	0.98	0.99	0.98
3		6-Aminocaproic acid [M+H]+ C6H13NO2 NIST 1065078	M-H2O+H 1+	114.091			147.1	161				146.2	109.2				0.32	0.32				0.32	0.32				0.64	0.69				0.69	0.63
4		Betaine [M+H]+ C5H11NO2 NIST 1058967	M+H 1+	118.086									305.5										0.29										0.97
5		Niacinamide [2M+H]+ C6H6N2O NIST 1061094---Niacinamide [2M+H]+ C6H6N2O NIST 1061095	M+H 1+	123.055		246.2	185.3	171.5	234.7			61.9	202	145.1		0.29	0.29	0.29	0.29			0.3	0.29	0.3		0.97	0.94	0.96	0.95			0.98	0.98	0.99
6		trans,cis-3,6-Nonadien-1-ol [M+H-H2O]+ C9H16O NIST 1110360---trans,cis-3,6-Nonadien-1-ol [M+H-H2O]+ C9H16O NIST 1110363---trans,cis-3,6-Nonadien-1-ol [M+H-H2O]+ C9H16O NIST 1110365---trans,cis-3,6-Nonadien-1-ol [M+H-H2O]+ C9H16O NIST 1110366---trans,cis-3,6-Nonadien-1-ol [M+H-H2O]+ C9H16O NIST 1110367	M-H2O+H 1+	123.116	85.8	113.6	224.4	114	178.5				106.8	92.9	0.66	0.67	0.66	0.66	0.66				0.62	0.68	0.69	0.59	0.73	0.72	0.72				0.69	0.55
7	*	Bicyclo[2.2.1]heptane-2-methanol [M+H-H2O]+ C8H14O NIST 1064039---Bicyclo[2.2.1]heptane-2-methanol [M+H-H2O]+ C8H14O NIST 1064040	M+H 1+	127.111							41.6		100	92.7							0.34		0.36	0.34							0.69		0.56	0.6
7	*	ISF of Valproic Acid [M+H]+ C8H16O2 NIST 1055053	-	109.1			318.9						307.2	276.1			0.34						0.34	0.34			0.68						0.78	0.7
7	*	Valproic Acid [M+H]+ C8H16O2 NIST 1055053	M-H2O+H 1+	127.111			92.5										0.34										0.59
8		2-Phenylpropionaldehyde [M+H]+ C9H10O NIST 1219938	M+H 1+	135.08			263.8			191.9							2.95			2.93							0.79			0.59
8		3-Phenoxy-1-propanol [M+H-H2O]+ C9H12O2 NIST 1110182---3-Phenoxy-1-propanol [M+H-H2O]+ C9H12O2 NIST 1110184	M-H2O+H 1+	135.08							314.7		438								2.94		2.94								0.56		0.51
9		2-Phenylpropionaldehyde [M+H]+ C9H10O NIST 1219939---2-Phenylpropionaldehyde [M+H]+ C9H10O NIST 1219941	M+H 1+	135.08	92.7	187.1	256.8		300.7	100.5			303.7,17.6	432	2.65	2.66	2.63		2.94	2.64			2.67,2.03	2.93	0.66	0.66	0.63		0.55	0.53			0.55,0.57	0.67
9		3-Phenoxy-1-propanol [M+H-H2O]+ C9H12O2 NIST 1110181---3-Phenoxy-1-propanol [M+H-H2O]+ C9H12O2 NIST 1110185---3-Phenoxy-1-propanol [M+H-H2O]+ C9H12O2 NIST 1110186	M-H2O+H 1+	135.08					276.2		114			207.2					2.64		2.73			2.66					0.62		0.7			0.52
10		(-)-Myrtenol [M+H-H2O]+ C10H16O NIST 1056468	M-H2O+H 1+	135.116									555.6										5.51										0.71
11		2-Hexanol, 2-methyl- [M+H-H2O]+ C7H16O NIST 1063893	M+Na 1+	139.111			267.2							118.4			0.49							0.43			0.53							0.51
12		9-Decen-1-ol [M+H]+ C10H20O NIST 1072974	M-H2O+H 1+	139.147				39.3										2.34										0.66
13		1-(p-Tolyl)butan-1-one [M+H-H2O]+ C11H14O NIST 1145143---1-(p-Tolyl)butan-1-one [M+H-H2O]+ C11H14O NIST 1145144	M-H2O+H 1+	145.101	77.6						268.1		174.9,1699.5	106.4	5.52						5.52		4.80,5.51	5.52	0.75						0.87		0.87,0.90	0.82
14		1-(p-Tolyl)butan-1-one [M+H-H2O]+ C11H14O NIST 1145142	M-H2O+H 1+	145.101						780.2	62.2		120.1	77.9						5.53	4.8		5.8	4.81						0.94	0.72		0.75	0.68
15		Phenyltetrazole C7H6N4	M+H 1+	147.065	306.8										2.91										0.53
16	*	D-Pyroglutamic acid [2M+H]+ C5H7NO3 NIST 1059593	M+NH4 1+	147.076										61.2										9.88										0.9
16	*	Glutamine C5H10N2O3---L-Glutamine [M+H-NH3]+ C5H10N2O3 NIST 1075754---L-Glutamine [M+H-NH3]+ C5H10N2O3 NIST 1075756---L-Glutamine [M+H]+ C5H10N2O3 NIST 1075743	M+H 1+	147.075	54	50.8	62.2	58.7	57.6	56.2	61.5	56	69		9.83	9.85	9.88	9.88	9.88	9.85	9.88	9.9	9.89		0.93	0.9	0.89	0.9	0.91	0.89	0.86	0.89	0.89
16	*	ISF of Glutamine C5H10N2O3---L-Glutamine [M+H]+ C5H10N2O3 NIST 1075743---L-Glutamine [M+H-NH3]+ C5H10N2O3 NIST 1075754---L-Glutamine [M+H-NH3]+ C5H10N2O3 NIST 1075756	-	130.049					84.5			79.3							9.9			9.9							0.51			0.53
17		(2S,3S)-(-)-3-Phenylglycidol [M+H]+ C9H10O2 NIST 1110377---(2S,3S)-(-)-3-Phenylglycidol [M+H]+ C9H10O2 NIST 1110381---(2S,3S)-(-)-3-Phenylglycidol [M+H]+ C9H10O2 NIST 1110383---1-(4-Methoxyphenyl)ethanone [M+H]+ C9H10O2 NIST 1144902---3-Methylphenylacetic acid [M+H]+ C9H10O2 NIST 1198160	M+H 1+	151.075		212.2	369.7			94.9	67.2			240.7		2.79	2.69			2.81	2.81			2.78		0.65	0.5			0.58	0.51			0.53
18		Coniferyl alcohol [M+H-H2O]+ C10H12O3 NIST 1068945	M-H2O+H 1+	163.075							53.2										0.43										0.54
19		1-(p-Tolyl)butan-1-one [M+H-H2O]+ C11H14O NIST 1145145	M+H 1+	163.11			265.7										0.42										0.55
20	*	1,2-Benzenedicarboxylic acid [M+H]+ C8H6O4 NIST 1109158---1,2-Benzenedicarboxylic acid [M+H]+ C8H6O4 NIST 1109159---1,2-Benzenedicarboxylic acid [M+H]+ C8H6O4 NIST 1109160	M+H 1+	167.033		1665.1	1594.6	1814.3	1821.6	1925.7	1727.1	1631.9	1707.7	1853.9		2.87	2.86	2.88	2.88	2.87	2.88	2.86	2.88	2.87		0.79	0.91	0.84	0.73	0.86	0.74	0.82	0.87	0.81
20	*	ISF of 1,2-Benzenedicarboxylic acid [M+H]+ C8H6O4 NIST 1109159---1,2-Benzenedicarboxylic acid [M+H]+ C8H6O4 NIST 1109158---1,2-Benzenedicarboxylic acid [M+H]+ C8H6O4 NIST 1109160	-	149.023	13437.9	16817.6		18201	16291.8	15879.6	17550.1	22599.5	7835.8	14501.4	2.86	2.87		2.88	2.88	2.87	2.88	2.84	2.86	2.87	0.77	0.87		0.94	0.82	0.97	0.88	0.91	0.96	0.96
21		1,2-Benzenedicarboxylic acid [M+H]+ C8H6O4 NIST 1109155	M+H 1+	167.033	1602.9			448							2.86			6.98							0.65			0.59
22		2-Mercaptobenzothiazole C7H5NS2	M+H 1+	167.993		62.0,37.5										0.99,1.79										0.60,0.69
23		Azelaic acid [M+H]+ C9H16O4 NIST 1055448	M-H2O+H 1+	171.1					179.5										0.55										0.51
24		(R)-(+)-Citronellic acid [M+H]+ C10H18O2 NIST 1054968	M+H 1+	171.139									135.7										1.78										0.52
24		3-Hydroxycapric acid [M+H-H2O]+ C10H20O3 NIST 1061379---3-Hydroxycapric acid [M+H]+ C10H20O3 NIST 1060944---Butyl 2-butoxyacetate [M+H]+ C10H20O3 NIST 1065902	M-H2O+H 1+	171.138	150.6	165.4				119.7					1.77	1.77				1.77					0.57	0.59				0.52
25		3-Hydroxycapric acid [M+H-H2O]+ C10H20O3 NIST 1061381	M-H2O+H 1+	171.14	124.2									146.4	2.2									1.78	0.51									0.52
26		Cotinine C10H12N2O---Serotonin C10H12N2O	M+H 1+	177.101		175.6	173	147.9		205.3	162.6	146.8	180.4	163.5		0.29	0.32	0.32		0.29	0.3	0.3	0.29	0.3		0.61	0.66	0.8		0.74	0.78	0.73	0.74	0.79
27		2-Butanone, 4-(2,6,6-trimethyl-2-cyclohexen-1-yl)- [M+H-H2O]+ C13H22O NIST 1066844	M-H2O+H 1+	177.163						652.6										5.53										0.61
28		2-Butanone, 4-(2,6,6-trimethyl-2-cyclohexen-1-yl)- [M+H]+ C13H22O NIST 1066833	M-H2O+H 1+	177.163							118.5										7.37										0.53
29		2-Butanone, 4-(2,6,6-trimethyl-2-cyclohexen-1-yl)- [M+H-H2O]+ C13H22O NIST 1066841---2-Butanone, 4-(2,6,6-trimethyl-2-cyclohexen-1-yl)- [M+H-H2O]+ C13H22O NIST 1066842---2-Butanone, 4-(2,6,6-trimethyl-2-cyclohexen-1-yl)- [M+H]+ C13H22O NIST 1066825	M-H2O+H 1+	177.163			211.5	109.2	328.5	129.9		124.8	304.9	309.4			1.21	1.21	1.13	1.2		1.21	1.21	1.21			0.76	0.75	0.6	0.75		0.66	0.77	0.81
30		2-Butanone, 4-(2,6,6-trimethyl-2-cyclohexen-1-yl)- [M+H-H2O]+ C13H22O NIST 1066839	M-H2O+H 1+	177.163					271.7				62						1.22				0.85						0.7				0.61
31	*	2-Propenoic acid, 3-(4-methoxyphenyl)- [M+H]+ C10H10O3 NIST 1055280---3-Methoxycinnamic acid C10H10O3---3-Methoxycinnamic acid; LC-ESI-QTOF; MS2; CE C10H10O3---4-Methoxycinnamic acid C10H10O3---4-Methoxycinnamic acid C10H10O3 MoNA 451197---4-Methoxycinnamic acid C10H10O3 MoNA 452304	M+H 1+	179.069	104.7	103.8	121.3	91.4		96.5	76.2		92	101.6	2.11	2.11	2.1	2.12		2.1	2.11		2.12	2.12	0.66	0.87	0.56	0.69		0.63	0.77		0.56	0.63
31	*	ISF of 3-Methoxycinnamic acid C10H10O3---3-Methoxycinnamic acid; LC-ESI-QTOF; MS2; CE C10H10O3---2-Propenoic acid, 3-(4-methoxyphenyl)- [M+H]+ C10H10O3 NIST 1055280---4-Methoxycinnamic acid C10H10O3 MoNA 452304---4-Methoxycinnamic acid C10H10O3 MoNA 451197---4-Methoxycinnamic acid C10H10O3	-	161.059										103.3										2.12										0.61
32		Iloprost [M+H-H2O]+ C22H32O4 NIST 1206247	M+2H 2+	181.122	892.4	1188.8	2568.2	1471		162.5			751.8	483.2	0.44	0.45	0.45	0.45		0.44			0.44	0.45	0.53	0.52	0.53	0.53		0.61			0.53	0.58
33		Pyridoxamine [M+H-H2O]+ C8H12N2O2 NIST 1064354---Pyridoxamine [M+H-H2O]+ C8H12N2O2 NIST 1162111	M+Na 1+	191.081								98.5	121.9	114.1								0.41	0.4	0.4								0.51	0.54	0.53
34		trans-Aconitic acid [M+H-H2O]+ C6H6O6 NIST 1059070---trans-Aconitic acid [M+H-H2O]+ C6H6O6 NIST 1059071---trans-Aconitic acid [M+H]+ C6H6O6 NIST 1055023---trans-Aconitic acid [M+H]+ C6H6O6 NIST 1055024	M+NH4 1+	192.051	127.1	74.9	127	69.8	120.4	121.2	122.2	72.6	130.2	127.7	9.95	9.98	10	10.01	9.94	9.93	9.94	9.94	9.97	9.96	0.71	0.84	0.83	0.87	0.81	0.72	0.76	0.8	0.73	0.79
35		Citric acid [M+H]+ C6H8O7 NIST 1058881---Citric acid [M+H]+ C6H8O7 NIST 1058882---Citric acid [M+H]+ C6H8O7 NIST 1058883---Citric acid [M+H]+ C6H8O7 NIST 1058884---Citric acid [M+H]+ C6H8O7 NIST 1058885---Citric acid [M+H]+ C6H8O7 NIST 1058886---Citric acid [M+H]+ C6H8O7 NIST 1058887---Citric acid [M+H]+ C6H8O7 NIST 1058890	M+H 1+	193.034	54.1	64.9	61.2	67.8	59.7	62.2	68.3	69.9	66.9	57.7	9.9	10	9.97	10.02	9.92	9.96	10.15	10.01	9.96	9.93	0.66	0.8	0.68	0.75	0.74	0.66	0.74	0.88	0.89	0.82
36		Tripropylene glycol [M+H]+ C9H20O4 NIST 1110092---Tripropylene glycol [M+H]+ C9H20O4 NIST 1110094	M+H 1+	193.143						51	36.2									0.32	0.32									0.8	0.7
37		Metaproterenol [M+H-H2O]+ C11H17NO3 NIST 1182753	M-H2O+H 1+	194.117	420.8				85.1						10.02				9.73						0.58				0.59
38		(2R,3R)-(-)-2-Benzyloxy-1,3,4-butanetriol [M+H]+ C11H16O4 NIST 1059720	M-H2O+H 1+	195.1			296										0.32										0.51
39		NCGC00168824-02!(E)-undec-2-enedioic acid C11H18O4	M-H2O+H 1+	197.117	216.4			290.2							0.36			0.34							0.61			0.52
40		3-Hydroxydodecanoic acid [M+H-H2O]+ C12H24O3 NIST 1061442	M-H2O+H 1+	199.168				2011.4										6.96										0.72
41		Unknown (carbon number 15); PlaSMA ID-660 C15H20	M+H 1+	201.163									130										5.26										0.54
42		2,5-Di-tert-butyl-1,4-benzoquinone [M+H]+ C14H20O2 NIST 1190492	M-H2O+H 1+	203.141										131.5										0.58										0.57
43		Spermine C10H26N4 MoNA 445249---Spermine; LC-ESI-QTOF; MS2; CE C10H26N4	M+H 1+	203.223					27.5					36.5					9.75					9.74					0.93					0.9
44		Acetyl-DL-carnitine [M+H]+ C9H17NO4 NIST 1064372	M+H 1+	204.123									90.8										0.29										0.84
45		Diethyl phthalic acid C12H14O4 MoNA 444674	M-H2O+H 1+	205.086				10087.9			10135.5			7485.4				6.86			1.08			1.38				0.92			0.93			0.94
46		Diethyl phthalic acid C12H14O4 MoNA 444675	M-H2O+H 1+	205.086	8455.4	8553.8	9004.2	13974.8	6587.1	7042		7647.8	22027.3		6.74	1.35	1.4	1.4	1.39	1.38		1.4	1.49		0.91	0.93	0.92	0.91	0.92	0.92		0.92	0.92
47		Methyl jasmonate [M+H-H2O]+ C13H20O3 NIST 1199372	M-H2O+H 1+	207.138			541.9										0.4										0.61
48		Tri(propylene glycol) methyl ether [M+H]+ C10H22O4 NIST 1110491	M+H 1+	207.159	39.8										0.34										0.66
49		Citric acid [M+H]+ C6H8O7 NIST 1058881---Citric acid [M+H]+ C6H8O7 NIST 1058882	M+NH4 1+	210.06	56.5	48.9	46.7	56.8	55.7	50.2	49.1	57.6	55.7	37.5	10.06	9.96	9.95	10.02	9.99	9.96	9.95	10.01	9.98	9.89	0.92	0.88	0.91	0.86	0.77	0.93	0.75	0.87	0.9	0.85
50	*	ISF of NCGC00180743-02!9-methoxycarbonyldec-9-enoic acid C12H20O4	-	179.107										240.8										0.34										0.6
50	*	ISF of NCGC00180743-02!9-methoxycarbonyldec-9-enoic acid C12H20O4	-	109.1					317										0.34										0.63
50	*	Jasmonic acid [M+H]+ C12H18O3 NIST 1114973	M+H 1+	211.134				202.3										0.34										0.54
50	*	NCGC00180743-02!9-methoxycarbonyldec-9-enoic acid C12H20O4	M-H2O+H 1+	211.132									317.6										0.36										0.57
51		2,6-Di-tert-butyl-4-hydroxymethylphenol [M+H-H2O]+ C15H24O2 NIST 1186367---2,6-Di-tert-butyl-4-hydroxymethylphenol [M+H-H2O]+ C15H24O2 NIST 1186372---Curcumol [M+H-H2O]+ C15H24O2 NIST 1164735	M-H2O+H 1+	219.174				209.2		88.5			132.3,92.9					1.13		0.38			1.19,1.59					0.71		0.65			0.58,0.61
52		2,6-Di-tert-butyl-4-hydroxymethylphenol [M+H-H2O]+ C15H24O2 NIST 1186371	M-H2O+H 1+	219.174					167.9										0.79										0.51
53		NCGC00381144-01_C15H24O2_(4S,4aR)-4-(Hydroxymethyl)-3,4a,8,8-tetramethyl-4a,5,6,7,8,8a-hexahydro-1(4H)-naphthalenone C15H24O2	M-H2O+H 1+	219.174					94.6					102					1.6					1.59					0.61					0.55
54	*	Diethyl phthalate [M+H]+ C12H14O4 NIST 1153022---Diethyl phthalic acid C12H14O4 MoNA 444674---Diethyl phthalic acid C12H14O4 MoNA 444675	M+H 1+	223.096	62.9	61.7	55.9	75.1		65.9	62.4	65.9	68.7	75.8	1.37	1.37	1.36	1.36		1.37	1.37	1.37	1.36	1.36	0.6	0.57	0.57	0.66		0.64	0.62	0.58	0.54	0.64
54	*	ISF of Diethyl phthalic acid C12H14O4 MoNA 444674---Diethyl phthalic acid C12H14O4 MoNA 444675---Diethyl phthalate [M+H]+ C12H14O4 NIST 1153022	-	121.028				702										1.38										0.83
55		2-Hydroxychalcone [M+H]+ C15H12O2 NIST 1227492---2-Hydroxychalcone [M+H]+ C15H12O2 NIST 1227493	M+H 1+	225.093		97.8	39.6			63.7	154.1			161.7		0.73	0.7			0.72	0.74			0.74		0.58	0.55			0.56	0.56			0.58
56		Methyl jasmonate [M+H-H2O]+ C13H20O3 NIST 1199372	M+H 1+	225.15					190.9										0.36										0.51
57		N,N-Dimethyldodecylamine N-oxide C14H31NO	M+H 1+	230.248		528.3										0.88										0.91
58		3-(2,3-Dichlorophenyl)-1,1-dimethylurea [M+H]+ C9H10Cl2N2O NIST 1176098---Diuron; LC-ESI-ITFT; MS2; CE C9H10Cl2N2O	M+H 1+	233.024	197.2	123.3	331.3	300.9	160.4	935.1	391.8	476.3	179.7	178	0.44	0.45	0.45	0.45	0.44	0.44	0.45	0.45	0.44	0.45	0.88	0.79	0.83	0.87	0.83	0.83	0.84	0.87	0.84	0.83
59		2,6-Di-tert-butyl-4-hydroxymethylphenol [M+H-H2O]+ C15H24O2 NIST 1186371---Curcumol [M+H-H2O]+ C15H24O2 NIST 1164739---Curcumol [M+H]+ C15H24O2 NIST 1164718---Curcumol [M+H]+ C15H24O2 NIST 1164720---NCGC00381144-01_C15H24O2_(4S,4aR)-4-(Hydroxymethyl)-3,4a,8,8-tetramethyl-4a,5,6,7,8,8a-hexahydro-1(4H)-naphthalenone C15H24O2	M+H 1+	237.184	96.3		227.2	161.1	287.1			130.7			1.18		1.19	1.19	1.19			1.21			0.53		0.55	0.61	0.62			0.8
59		Maslinic acid [M+H]+ C30H48O4 NIST 1216722---Sumaresinolic acid [M+H-H2O]+ C30H48O4 NIST 1156629---Sumaresinolic acid [M+H]+ C30H48O4 NIST 1156610	M+2H 2+	237.184						125	171.3		307.3	295.3						1.2	1.21		1.19	1.21						0.56	0.69		0.78	0.78
60		Unknown (carbon number 18); PlaSMA ID-1009 C18H26	M+H 1+	243.21		178.9										2.09										0.56
61		NCGC00385962-01_C16H24O3_ C16H24O3	M-H2O+H 1+	247.166	114.4	115.7	192	103.2		110.1		136.6	222.9		9.73	9.71	9.75	9.69		9.73		9.73	9.77		0.84	0.83	0.82	0.87		0.89		0.82	0.87
62		Tri(propylene glycol) butyl ether [M+H]+ C13H28O4 NIST 1110759---Tri(propylene glycol) butyl ether [M+H]+ C13H28O4 NIST 1110761---Tri(propylene glycol) butyl ether [M+H]+ C13H28O4 NIST 1110762---Tri(propylene glycol) butyl ether [M+H]+ C13H28O4 NIST 1110765	M+H 1+	249.206						76	63.4	65.8	62	63.6						0.59	0.57	0.58	0.59	0.58						0.91	0.56	0.83	0.86	0.73
63		2,4,6-Triallyloxy-1,3,5-triazine [M+H]+ C12H15N3O3 NIST 1202662---2,4,6-Triallyloxy-1,3,5-triazine [M+H]+ C12H15N3O3 NIST 1202664	M+H 1+	250.118								18.3		29.1								0.65		0.64								0.55		0.6
64		Diphenylphosphate C12H11O4P	M+H 1+	251.046									97.5										1.97										0.62
65		Bicyclo[2.2.1]heptane-2-methanol [M+H-H2O]+ C8H14O NIST 1064040	2M+H 1+	253.216	222.9										0.97										0.54
66		Palmitamide [M+H]+ C16H33NO NIST 1192369---Palmitamide [M+H]+ C16H33NO NIST 1192371---Palmitamide [M+H]+ C16H33NO NIST 1192372---Palmitamide [M+H]+ C16H33NO NIST 1192375	M+H 1+	256.263			1124.7	913.8	1496.7	607.6		652.7	649.6	755.9			2.28	2.27	2.27	2.27		2.28	2.27	2.27			0.72	0.54	0.76	0.72		0.68	0.66	0.68
67		Tetradonium cation [Cat]+ C17H38N NIST 1189166	M 1+	256.299								54.3										1.18										0.7
68		1,2-Dimyristoyl-sn-glycerol [M+H-H2O]+ C31H60O5 NIST 1149322	M+2H 2+	257.226									99.8										4.89										0.65
69		Dibutyl adipate [M+H]+ C14H26O4 NIST 1186310---Dibutyl adipate [M+H]+ C14H26O4 NIST 1186311	M+H 1+	259.19	1339.8	1547.3			424.9					271.8	2.91	2.92			2.9					2.91	0.91	0.6			0.84					0.62
70		19-Norandrosterone [M+H-H2O]+ C18H28O2 NIST 1146666	M-H2O+H 1+	259.203					229.5										1.11										0.59
71		19-Norandrosterone [M+H-H2O]+ C18H28O2 NIST 1146664---19-Norandrosterone [M+H-H2O]+ C18H28O2 NIST 1146665---9,12-Octadecadiynoic Acid [M+H-H2O]+ C18H28O2 NIST 1139987---Stearidonic acid [M+H-H2O]+ C18H28O2 NIST 1204953	M-H2O+H 1+	259.205	219.1	488.4	374.8	182.1	433.1	146.1			712.4	678	2.03	2.03	2.02	2.04	2.03	2.04			2.03	2.03	0.69	0.58	0.67	0.63	0.66	0.72			0.73	0.64
72		NCGC00169439-02!8-(2,3-dihydroxy-3-methylbutyl)-7-methoxychromen-2-one C15H18O5	M-H2O+H 1+	261.109								37.5										0.41										0.52
73		Dibutyl phthalate C16H22O4 MoNA 444665---Dibutyl phthalate C16H22O4 MoNA 444666---Dibutyl phthalate C16H22O4 MoNA 449139---Dibutyl phthalate C16H22O4 MoNA 449140	M-H2O+H 1+	261.148		2586.2		2850.7	2741.3		2712.7					2.87		2.88	2.88		2.88					0.74		0.85	0.91		0.84
74		Pinolenic acid [M+H-H2O]+ C18H30O2 NIST 1212944	M-H2O+H 1+	261.221		349.3										2.09										0.58
75		Conjugated linoleic Acid (10E,12Z) [M+H-H2O]+ C18H32O2 NIST 1212841	M-H2O+H 1+	263.237	152.1										4.65										0.53
76		Tributyl phosphate [2M+H]+ C12H27O4P NIST 1147669---Tributyl phosphate [M+H]+ C12H27O4P NIST 1147661	M+H 1+	267.172	57.3	63.7	54.3	62.9	52.5	76.2	58.6	58.7	70.3	62.6	1.29	1.28	1.28	1.28	1.28	1.28	1.29	1.27	1.28	1.27	0.96	0.95	0.97	0.96	0.94	0.97	0.94	0.96	0.96	0.96
77		Retinol [M+H-H2O]+ C20H30O NIST 1066889---Retinol [M+H-H2O]+ C20H30O NIST 1066890	M-H2O+H 1+	269.226		93.9			878.2		150.4		11082.7			5.27			5.51		6.37		5.8			0.53			0.72		0.54		0.74
78		Retinol [M+H-H2O]+ C20H30O NIST 1066895	M-H2O+H 1+	269.226			146.6										7.16										0.56
79		Retinol [M+H-H2O]+ C20H30O NIST 1066892	M-H2O+H 1+	269.226	220.5		220.1								2.86		5.51								0.57		0.56
80		Retinol [M+H-H2O]+ C20H30O NIST 1066891	M-H2O+H 1+	269.226	7036.9	519		427.2		3720.0,4031.4	1251.9		193733	10329.6	5.52	5.51		5.52		5.81,5.28	5.81		5.51	5.52	0.71	0.68		0.62		0.74,0.75	0.75		0.74	0.74
81		19-Nor-4-androstene-3,17-dione [M+H]+ C18H24O2 NIST 1111331---Galaxolidone; LC-ESI-ITFT; MS2; CE C18H24O2	M+H 1+	273.185	52.2	265.1					55.2	152		146.2	1.42	1.39					1.39	1.39		0.68	0.8	0.77					0.77	0.74		0.55
82		9-OxoOTrE [M+H-H2O]+ C18H28O3 NIST 1139417	M-H2O+H 1+	275.2		346.3										0.47										0.53
83		9-OxoOTrE [M+H-H2O]+ C18H28O3 NIST 1139415---9-OxoOTrE [M+H-H2O]+ C18H28O3 NIST 1139418	M-H2O+H 1+	275.2			426.1		806.3								0.68		0.68								0.69		0.59
84	*	ISF of Amitriptyline C20H23N MoNA 443015	-	235.169							154.2										1.16										0.82
85		9-Oxo-10E,12Z-octadecadienoic acid [M+H]+ C18H30O3 NIST 1137131---FA 18:3+1O; PlaSMA ID-1318 C18H30O3	M-H2O+H 1+	277.216			1405.2	428.6									0.6	0.58									0.59	0.76
86	*	Dibutyl phthalate C16H22O4 MoNA 444665	M+H 1+	279.159	7689.6	7930.8,6832.1	8830.3,9856.8	9789	8922.7,5344.9	8318.7	8321.7	7706.4	8073.8,8533.7	8530.5	2.86	2.87,1.01	2.86,1.47	2.88	2.88,1.39	2.87	2.88	2.86	2.88,1.38	2.87	0.97	0.97,0.97	0.96,0.97	0.96	0.96,0.97	0.97	0.97	0.97	0.97,0.97	0.96
86	*	ISF of Dibutyl phthalate C16H22O4 MoNA 444665	-	149.023	13437.9	16817.6		18201	16291.8	15879.6	17550.1	22599.5	7835.8	14501.4	2.86	2.87		2.88	2.88	2.87	2.88	2.84	2.86	2.87	0.69	0.64		0.71	0.68	0.67	0.67	0.68	0.69	0.67
87		9-Octadecenamide, (Z)- [M+H-NH3]+ C18H35NO NIST 1192069---9-Octadecenamide, (Z)- [M+H-NH3]+ C18H35NO NIST 1192070---9-Octadecenamide, (Z)- [M+H-NH3]+ C18H35NO NIST 1192071---9-Octadecenamide, (Z)- [M+H]+ C18H35NO NIST 1192042	M+H 1+	282.279			882.6	912.7	1614.7		703.1	508.4	507.6	627.7			2.37	2.36	2.38		2.38	2.39	2.37	2.38			0.72	0.78	0.73		0.57	0.52	0.56	0.7
88		Isopimaric acid [M+H]+ C20H30O2 NIST 1171787	M-H2O+H 1+	285.221									125.5										5.88										0.54
89		5-HETE lactone [M+H]+ C20H30O2 NIST 1136278---Eicosanoids_EPA_C20H30O2 C20H30O2---Isopimaric acid [M+H-H2O]+ C20H30O2 NIST 1171810---Isopimaric acid [M+H-H2O]+ C20H30O2 NIST 1171811---cis-5,8,11,14,17-Eicosapentaenoic acid [M+H]+ C20H30O2 NIST 1135560	M-H2O+H 1+	285.221	196.7	783.8	185.7,663.3	554.4,92.1	211.7	493.7	1884.7,158.3		1528.9	513.6	2.31	4.83	4.43,4.82	4.83,4.43	2.31	4.44	4.80,5.15		4.43	4.43	0.54	0.55	0.63,0.64	0.58,0.66	0.69	0.79	0.58,0.61		0.81	0.75
89		Lutein [M+H]+ C40H56O2 NIST 1178233	M+2H 2+	285.221							400.5										4.43										0.74
89		Retinal, 9-cis- [M+H]+ C20H28O NIST 1067261	M+H 1+	285.221					285.4										4.43										0.72
90		Isopimaric acid [M+H]+ C20H30O2 NIST 1171786	M-H2O+H 1+	285.221									317.4										7.05										0.56
91	*	ISF of cis-5,8,11,14,17-Eicosapentaenoic acid [M+H]+ C20H30O2 NIST 1135568	-	161.096									81.6										2.33										0.55
91	*	Retinal, 9-cis- [M+H]+ C20H28O NIST 1067257	M+H 1+	285.221									231.8										2.33										0.79
91	*	cis-5,8,11,14,17-Eicosapentaenoic acid [M+H]+ C20H30O2 NIST 1135568	M-H2O+H 1+	285.221										160.2										2.29										0.54
92		5-HETE lactone [M+H]+ C20H30O2 NIST 1136276	M-H2O+H 1+	285.221	102										1.99										0.67
93		Lutein [M+H]+ C40H56O2 NIST 1178232	M+2H 2+	285.221	1423				1166.2	238.2			6953.1	246.4,2535.1	4.81				4.81	3.97			4.8	5.15,4.81	0.56				0.56	0.73			0.63	0.61,0.63
94		5-HETE lactone [M+H]+ C20H30O2 NIST 1136279	M-H2O+H 1+	285.221	103.6										5.14										0.57
95		3-Nonen-1-ol, (Z)- [M+H]+ C9H18O NIST 1056260	2M+H 1+	285.279		101.9										3.34										0.5
96		Heptadecasphing-4-enine [M+H]+ C17H35NO2 NIST 1216381	M+H 1+	286.274	36										1.88										0.8
97		Heptadecasphing-4-enine [M+H-H2O]+ C17H35NO2 NIST 1216397	M+H 1+	286.274						25.1										2.27										0.53
98		Lauroyl diethanolamide C16H33NO3 MoNA 452429---Lauryl diethanolamide C16H33NO3	M+H 1+	288.253							54.8	35.1	41.3	37.2							1.06	1.04	1.06	1.04							0.77	0.75	0.78	0.8
99		C17-Sphinganine C17H37NO2	M+H 1+	288.289	196.6			146.8		538.8	336.6	251.3	259.8	164.8	1.18			1.21		1.22	1.19	1.18	1.19	1.21	0.64			0.51		0.77	0.58	0.6	0.57	0.55
100		Valproic Acid [M+H-H2O]+ C8H16O2 NIST 1055056	2M+H 1+	289.237	122.8										1.77										0.59
101		.gamma.-Linolenic acid ethyl ester [M+H]+ C20H34O2 NIST 1220638---Linolenic acid ethyl ester [M+H]+ C20H34O2 NIST 1220716---cis-8,11,14-Eicosatrienoic acid [M+H-H2O]+ C20H34O2 NIST 1220241---cis-8,11,14-Eicosatrienoic acid [M+H-H2O]+ C20H34O2 NIST 1220242	M-H2O+H 1+	289.253				76.4		124.3		72.8	106.3	74.6				2		2.01		2	1.99	2				0.69		0.72		0.63	0.58	0.55
102		trans-EKODE-(E)-Ib [M+H-H2O]+ C18H30O4 NIST 1138660---trans-EKODE-(E)-Ib [M+H-H2O]+ C18H30O4 NIST 1138666	M-H2O+H 1+	293.21			1524.9		2452.2								0.68		0.68								0.56		0.57
103		13(S)-HODE methyl ester [M+H-H2O]+ C19H34O3 NIST 1131342	M-H2O+H 1+	293.247					110										1.89										0.69
103		9Z,11E,13E-Octadecatrienoic acid methyl ester [M+H]+ C19H32O2 NIST 1134103	M+H 1+	293.247			102.5										1.89										0.63
104		13-Keto-9Z,11E-octadecadienoic acid [M+H-H2O]+ C18H30O3 NIST 1137193	M+H 1+	295.225					100										5.66										0.53
105		4-Androsten-3.alpha.-ol-17-one [M+H-H2O]+ C19H28O2 NIST 1111470	M+Li 1+	295.226	255.7										0.57										0.53
105		13-Keto-9Z,11E-octadecadienoic acid [M+H-H2O]+ C18H30O3 NIST 1137192---13-Keto-9Z,11E-octadecadienoic acid [M+H]+ C18H30O3 NIST 1137177---13-Keto-9Z,11E-octadecadienoic acid [M+H]+ C18H30O3 NIST 1137178---Unknown (carbon number 17); PlaSMA ID-1523 C17H30N2O2	M+H 1+	295.226		932.3	638.5	481.8	1172.9							0.49	0.58	0.58	0.58							0.56	0.62	0.51	0.63
106		13-Keto-9Z,11E-octadecadienoic acid [M+H-H2O]+ C18H30O3 NIST 1137194	M+H 1+	295.226	714.1										1.1										0.6
107	*	13-Keto-9Z,11E-octadecadienoic acid [M+H]+ C18H30O3 NIST 1137174---13S-Hydroxy-9Z,11E,15Z-octadecatrienoic acid [M+H-H2O]+ C18H30O3 NIST 1129450---9-Oxo-10E,12Z-octadecadienoic acid [M+H-H2O]+ C18H30O3 NIST 1137153---9S-Hydroxy-10E,12Z,15Z-octadecatrienoic acid [M+H-H2O]+ C18H30O3 NIST 1129390	M+H 1+	295.227		1788.9	2119.1	1734.7	4052.3							1.09	1.11	1.11	1.11							0.7	0.83	0.73	0.78
107	*	ISF of 13S-Hydroxy-9Z,11E,15Z-octadecatrienoic acid [M+H-H2O]+ C18H30O3 NIST 1129450---9S-Hydroxy-10E,12Z,15Z-octadecatrienoic acid [M+H-H2O]+ C18H30O3 NIST 1129390---13-Keto-9Z,11E-octadecadienoic acid [M+H]+ C18H30O3 NIST 1137174---9-Oxo-10E,12Z-octadecadienoic acid [M+H-H2O]+ C18H30O3 NIST 1137153	-	277.216		2266.3		1893.2	4663.6							1.09		1.11	1.11							0.76		0.67	0.84
108		Phytanic acid [M+H]+ C20H40O2 NIST 1162622---Phytanic acid [M+H]+ C20H40O2 NIST 1162625---Phytanic acid [M+H]+ C20H40O2 NIST 1162626---Stearic acid ethyl ester [M+H]+ C20H40O2 NIST 1220592	M-H2O+H 1+	295.299	252.5	214.2		308.3	275.9				204.5	240.6	2.35	2.35		2.34	2.35				2.35	2.35	0.53	0.5		0.57	0.6				0.53	0.53
109		Dibutyl phthalate C16H22O4 MoNA 444664---Dibutyl phthalate C16H22O4 MoNA 449139---Dibutyl phthalate C16H22O4 MoNA 449140	M+NH4 1+	296.188	299	240.9	267.6	265.7	265.5	242.8	272	260.1	295.6	304.2	9.81	9.79	9.8	9.8	9.79	9.79	9.78	9.79	9.81	9.8	0.76	0.81	0.79	0.86	0.86	0.87	0.82	0.86	0.81	0.84
110		Phytol,mixture of isomers; LC-ESI-QTOF; MS2; CE C20H40O	M+H 1+	297.315	107.7	73.3	99.6	114.5	113.7	64.1	54.8	78.4	61.3	67.9	2.33	2.33	2.32	2.34	2.33	2.33	2.33	2.32	2.33	2.33	0.92	0.93	0.9	0.94	0.92	0.91	0.91	0.92	0.93	0.95
111	*	D-erythro-C18-Sphingosine [M+H-H2O]+ C18H37NO2 NIST 1220822---D-erythro-C18-Sphingosine [M+H]+ C18H37NO2 NIST 1072844	M+H 1+	300.289					39.5				66.5						1.62				1.63						0.54				0.54
111	*	ISF of D-erythro-C18-Sphingosine [M+H-H2O]+ C18H37NO2 NIST 1220822---D-erythro-C18-Sphingosine [M+H]+ C18H37NO2 NIST 1072844	-	282.279									83.9										1.63										0.56
112		Perillaldehyde [M+H-H2O]+ C10H14O NIST 1153533	2M+H 1+	301.215		215.7										0.49										0.61
113		11(12)-EpETE [M+H]+ C20H30O3 NIST 1133115	M-H2O+H 1+	301.216					172.2										1.68										0.57
114		Perillaldehyde [M+H]+ C10H14O NIST 1153496	2M+H 1+	301.216						204.8										4.7										0.56
114		Pinolenic acid [M+H]+ C18H30O2 NIST 1212917	M+Na 1+	301.216										100.5										4.7										0.56
115		5-HETE lactone [M+H-H2O]+ C20H30O2 NIST 1136309	M+H 1+	303.232					765.4										1.24										0.6
116		(-)-Myrtenol [M+H-H2O]+ C10H16O NIST 1056464	2M+H 1+	305.248		1236.8										1.81										0.51
117		9Z,11E,13E-Octadecatrienoic acid ethyl ester [M+H]+ C20H34O2 NIST 1140956---9Z,11E,13E-Octadecatrienoic acid ethyl ester [M+H]+ C20H34O2 NIST 1140957	M+H 1+	307.263		4480.5			429.7							2.09			2.11							0.9			0.88
118		Isopimaric acid [M+H]+ C20H30O2 NIST 1171788---cis-5,8,11,14,17-Eicosapentaenoic acid [M+H]+ C20H30O2 NIST 1135562	M+Li 1+	309.239			157.5		170.8								1.92		1.92								0.67		0.6
119	*	ISF of cis-11,14-Eicosadienoic acid [M+H-H2O]+ C20H36O2 NIST 1220462	-	263.236		390.1										2.24										0.55
119	*	cis-11,14-Eicosadienoic acid [M+H-H2O]+ C20H36O2 NIST 1220462	M+H 1+	309.278		614.1										2.26										0.73
120		Linoleic acid ethyl ester [M+H]+ C20H36O2 NIST 1220689	M+H 1+	309.278		96.9										2.59										0.54
121		Linoleic acid ethyl ester [M+H]+ C20H36O2 NIST 1220690---Linoleic acid ethyl ester [M+H]+ C20H36O2 NIST 1220693	M+H 1+	309.278		801			162.7							3.08			3.09							0.67			0.53
122		Avobenzone [M+H]+ C20H22O3 NIST 1174370	M+H 1+	311.165	26.9		25.2			52.8	50.6			55.7	1.27		1.29			2.08	2.06			2.08	0.68		0.81			0.81	0.9			0.79
123		Avobenzone [M+H]+ C20H22O3 NIST 1174371	M+H 1+	311.164	68.1									22.2	2.09									1.28	0.82									0.77
124		trans-EKODE-(E)-Ib [M+H-H2O]+ C18H30O4 NIST 1138666---trans-EKODE-(E)-Ib [M+H]+ C18H30O4 NIST 1138634	M+H 1+	311.222			475	279.8	686.3								0.64	0.64	0.62								0.78	0.86	0.84
125		Avocadene 2-acetate C19H36O4 MoNA 452031---Monopalmitolein (9c) [M+H-H2O]+ C19H36O4 NIST 1185813---Monopalmitolein (9c) [M+H-H2O]+ C19H36O4 NIST 1185814---Monopalmitolein (9c) [M+H]+ C19H36O4 NIST 1185798---NCGC00385126-01!1,2-dihydroxyheptadec-16-en-4-yl acetate C19H36O4	M-H2O+H 1+	311.258	368.6		275.9	1219.7	266.3						4.6		4.59	4.6	4.35						0.82		0.5	0.85	0.54
125		.omega.-3 Arachidonic acid [M+H]+ C20H32O2 NIST 1216093---cis-5,8,11,14-Eicosatetraenoic acid [M+H]+ C20H32O2 NIST 1133491	M+Li 1+	311.257				689.7	517.2									4.33	4.6									0.54	0.67
126		Oleic acid ethyl ester [M+H]+ C20H38O2 NIST 1220745	M+H 1+	311.294		876.3										3.38										0.61
127		9-Oxo-10E,12Z-octadecadienoic acid [M+H]+ C18H30O3 NIST 1137131---9-Oxo-10E,12Z-octadecadienoic acid [M+H]+ C18H30O3 NIST 1137132---FA 18:3+1O; PlaSMA ID-1515 C18H30O3	M+NH4 1+	312.253	26			71.7	156.2						1.1			1.11	1.11						0.53			0.54	0.61
128		cis-8,11,14-Eicosatrienoic acid [M+H-H2O]+ C20H34O2 NIST 1220251	M+Li 1+	313.273							525.8,440.0										4.70,2.40										0.53,0.55
129		Phytol,mixture of isomers; LC-ESI-QTOF; MS2; CE C20H40O	M+NH4 1+	314.343	99.8					73.1	75.3		61.4	82.7	2.2					2.19	2.19		2.21	2.18	0.94					0.91	0.92		0.94	0.94
130		Bicyclo-prostaglandin E2 [M+H-H2O]+ C20H30O4 NIST 1215422	M-H2O+H 1+	317.21					556.1										0.51										0.53
131		Prostaglandin B1 [M+H]+ C20H32O4 NIST 1210712	M-H2O+H 1+	319.225					987.9										1.15										0.55
131		Tibolone [M+H]+ C21H28O2 NIST 1115009---Tibolone [M+H]+ C21H28O2 NIST 1115010	M+Li 1+	319.225		415.6	449.6									1.06	1.11									0.68	0.58
132		Prostaglandin B1 [M+H]+ C20H32O4 NIST 1106749	M-H2O+H 1+	319.225				583.4										1.25										0.71
133		.DELTA.9-Tetrahydrocannabinol [M+H]+ C21H30O2 NIST 1186681	M+Li 1+	321.242		351.9										1.28										0.51
133		20-Hydroxy-(5Z,8Z,11Z,14Z)-eicosatetraenoic acid [M+H]+ C20H32O3 NIST 1133366---NCGC00180720-03_C20H32O3_1-Naphthalenepentanoic acid, 1,4,4a,5,6,7,8,8a-octahydro-beta,2,5,5,8a-pentamethyl-4-oxo-, (betaS,1S,8aR)- C20H32O3	M+H 1+	321.241				367.7	469.5									1.44	1.39									0.56	0.58
134		.omega.-3 Arachidonic acid [M+H]+ C20H32O2 NIST 1216095	M+NH4 1+	322.274				148.5										2.23										0.56
135	*	5S-Hydroxy-6E,8Z,11Z-eicosatrienoic acid [M+H-H2O]+ C20H34O3 NIST 1142545---5S-Hydroxy-6E,8Z,11Z-eicosatrienoic acid [M+H-H2O]+ C20H34O3 NIST 1142546	M+H 1+	323.258		3669.6			417.2							2.14			2.11							0.57			0.72
135	*	ISF of 5S-Hydroxy-6E,8Z,11Z-eicosatrienoic acid [M+H-H2O]+ C20H34O3 NIST 1142545---5S-Hydroxy-6E,8Z,11Z-eicosatrienoic acid [M+H-H2O]+ C20H34O3 NIST 1142546	-	277.216		1172.1			266.1							2.14			2.11							0.82			0.63
136		Linoleic acid ethyl ester [M+H]+ C20H36O2 NIST 1220690---Linoleic acid ethyl ester [M+H]+ C20H36O2 NIST 1220692	M+NH4 1+	326.305		227.7		17.6								3.08		3.09								0.86		0.55
137		Triphenylphosphate C18H15O4P	M+H 1+	327.078						198.9										1.03										0.66
138		trans-EKODE-(E)-Ib [M+H-H2O]+ C18H30O4 NIST 1138658	M+NH4 1+	328.246					143.7										0.47										0.82
139		Oleic acid ethyl ester [M+H]+ C20H38O2 NIST 1220743	M+NH4 1+	328.321		118.8										3.4										0.77
140		Bis(2-ethylhexyl)phosphate C16H35O4P	M+Li 1+	329.244									66.3										1.99										0.89
141		Monopalmitolein (9c) [M+H]+ C19H36O4 NIST 1185796	M+H 1+	329.268				511.4	356.1									2.08	2.07									0.55	0.57
142	*	1-Hexadecanoyl-sn-glycerol [M+H]+ C19H38O4 NIST 1060664---1-Hexadecanoyl-sn-glycerol [M+H]+ C19H38O4 NIST 1060666---1-Hexadecanoyl-sn-glycerol [M+H]+ C19H38O4 NIST 1060667---2-Palmitoylglycerol C19H38O4	M+H 1+	331.284	470.3	448	537.9	501.7	644			319.3	271.8		2.39	2.39	2.41	2.4	2.4			2.41	2.41		0.72	0.75	0.61	0.65	0.61			0.55	0.66
142	*	ISF of 2-Palmitoylglycerol C19H38O4---1-Hexadecanoyl-sn-glycerol [M+H]+ C19H38O4 NIST 1060666---1-Hexadecanoyl-sn-glycerol [M+H]+ C19H38O4 NIST 1060667---1-Hexadecanoyl-sn-glycerol [M+H]+ C19H38O4 NIST 1060664	-	313.273	621.3	603	689		826.6			451.7	415		2.39	2.37	2.39		2.4			2.41	2.39		0.53	0.63	0.73		0.52			0.64	0.58
143		Arachidonic acid ethyl ester [M+H]+ C22H36O2 NIST 1220768	M+H 1+	333.278		721.1										3.02										0.58
144		Arachidonic acid ethyl ester [M+H]+ C22H36O2 NIST 1220772	M+H 1+	333.279		365.2										2.26										0.61
145		.DELTA.12-Prostaglandin D2 [M+H-H2O]+ C20H32O5 NIST 1219464---15-Ketoprostaglandin E1 [M+H-H2O]+ C20H32O5 NIST 1218407	M-H2O+H 1+	335.22				576	1174									0.53	0.53									0.52	0.56
146		Dihomo-.gamma.-linolenic acid ethyl ester [M+H]+ C22H38O2 NIST 1212867	M+H 1+	335.294		154.6,248.4										3.21,2.44										0.62,0.68
147		1-Linoleoylglycerol [M+H]+ C21H38O4 NIST 1219315---1-Linoleoylglycerol [M+H]+ C21H38O4 NIST 1219319	M-H2O+H 1+	337.273	155.9	87.1	161.4	827.4,155.9	256.9				367.6		4.98	4.98	4.97	4.37,4.98	4.98				4.66		0.56	0.54	0.61	0.65,0.69	0.59				0.79
148	*	Erucamide C22H43NO	M+H 1+	338.342	54150.4	45612.1	28350.2	40997.7	47201.3	52847.8	47505.5	26672.4	27910.8	28434.2	3.05	3.06	3.05	3.07	3.05	3.06	3.06	3.05	3.07	3.06	0.91	0.91	0.9	0.91	0.91	0.91	0.91	0.91	0.81	0.9
148	*	ISF of Erucamide C22H43NO	-	321.315	1286.3	1175.1	678.6	1021.6	1137.1	1195.1	1103.1	651.5		694.5	3.05	3.06	3.05	3.07	3.05	3.06	3.06	3.05		3.06	0.88	0.78	0.93	0.93	0.88	0.77	0.84	0.79		0.75
148	*	ISF of Erucamide C22H43NO	-	303.304	314.4	298		264.9	287.2	327.8	284.4	172	175.7	177.7	3.05	3.06		3.07	3.05	3.06	3.06	3.05	3.07	3.06	0.82	0.77		0.73	0.66	0.68	0.54	0.8	0.62	0.66
149		9S,11R,15S-Trihydroxy-13E-prostaenoic acid [M-H-H2O]- C20H36O5 NIST 1203362	M-H2O+H 1+	339.253		791.2										1.73										0.51
150		Monoelaidin [M+H]+ C21H40O4 NIST 1193240	M-H2O+H 1+	339.288						33.8			538.6							3.33			4.91							0.52			0.77
151		Monoelaidin [M+H]+ C21H40O4 NIST 1193241	M-H2O+H 1+	339.289				181.1										5.21										0.55
152		Glycerol 1-stearate [M+H]+ C21H42O4 NIST 1060656	M-H2O+H 1+	341.304			439.3			451.7							4.95			2.85							0.59			0.83
153		Glycerol 1-stearate [M+H]+ C21H42O4 NIST 1060651---Glycerol 1-stearate [M+H]+ C21H42O4 NIST 1060653---Glycerol 1-stearate [M+H]+ C21H42O4 NIST 1060654---Glycerol 1-stearate [M+H]+ C21H42O4 NIST 1060655	M-H2O+H 1+	341.305		577.6	1031.7	538.1	1063.3		286.2		584.3	759.3		2.89	2.89	2.88	2.88		2.88		2.88	2.77		0.86	0.82	0.8	0.83		0.7		0.88	0.54
154		Unknown (carbon number 21); PlaSMA ID-1886 C21H43NO2	M+H 1+	342.336	32.1										1.81										0.84
155		(.+/-.)-13-Hydroxy-4Z,7Z,10Z,14E,16Z,19Z-docosahexaenoic acid [M+H-H2O]+ C22H32O3 NIST 1142508---17-Keto-(7Z,10Z,13Z,15E,19Z)-docosapentaenoic acid [M+H]+ C22H32O3 NIST 1134358	M+H 1+	345.242				131	166.9									1.34	1.34									0.73	0.56
155		15-OxoEDE [M+H-H2O]+ C20H34O3 NIST 1140220	M+Na 1+	345.24		224.3										1.37										0.57
156		cis-4,7,10,13,16,19-Docosahexaenoic acid [M+H]+ C22H32O2 NIST 1133542	M+NH4 1+	346.275					834.2										2.11										0.51
156		oxy-Arachidonoyl ethanolamide [M+Na]+ C22H37NO3 NIST 1213810	M-H2O+H 1+	346.275				422.2										2.12										0.53
157		Monopalmitolein (9c) [M+H-H2O]+ C19H36O4 NIST 1185818	M+NH4 1+	346.294					19.2										2.07										0.68
158		Arachidonic acid ethyl ester [M+H]+ C22H36O2 NIST 1220771	M+NH4 1+	350.305		166.8										3.02										0.75
159		Dihomo-.gamma.-linolenic acid ethyl ester [M+H]+ C22H38O2 NIST 1212865	M+NH4 1+	352.321		70.8			364.6		218					3.21			2.09		2.09					0.52			0.55		0.52
160		C21H36O4; PlaSMA ID-1954 C21H36O4---Monolinolenin (9c,12c,15c) [M+H]+ C21H36O4 NIST 1185830---Monolinolenin (9c,12c,15c) [M+H]+ C21H36O4 NIST 1185831	M+H 1+	353.268			180.6	256.4	467.8								1.15	1.17	1.17								0.65	0.56	0.83
161		Monolinolenin (9c,12c,15c) [M+H]+ C21H36O4 NIST 1185828---Monolinolenin (9c,12c,15c) [M+H]+ C21H36O4 NIST 1185829	M+H 1+	353.268				150.9	253.3									1.95	1.94									0.51	0.62
162	*	1-Linoleoylglycerol [M+H]+ C21H38O4 NIST 1219313---1-Linoleoylglycerol [M+H]+ C21H38O4 NIST 1219314	M+H 1+	355.284	2968.3		1531.9	2625.9	5017.5						2.2		2.19	2.19	2.18						0.78		0.73	0.64	0.69
162	*	ISF of 1-Linoleoylglycerol [M+H]+ C21H38O4 NIST 1219314---1-Linoleoylglycerol [M+H]+ C21H38O4 NIST 1219313	-	263.237	1651.4		918.2	1433.1	2934.2						2.2		2.19	2.19	2.18						0.79		0.74	0.85	0.76
162	*	ISF of 1-Linoleoylglycerol [M+H]+ C21H38O4 NIST 1219314---1-Linoleoylglycerol [M+H]+ C21H38O4 NIST 1219313	-	337.273	1230		635.1	1119.8	2060.2						2.18		2.17	2.19	2.18						0.73		0.75	0.75	0.8
162	*	ISF of 1-Linoleoylglycerol [M+H]+ C21H38O4 NIST 1219314---1-Linoleoylglycerol [M+H]+ C21H38O4 NIST 1219313	-	245.226	523.6			479.6	951						2.2			2.19	2.18						0.72			0.6	0.79
163		Erucamide C22H43NO	M+NH4 1+	355.368						24.3	18.9									3.09	3.06									0.93	0.85
164	*	ISF of Monoelaidin [M+H]+ C21H40O4 NIST 1193238---Monoelaidin [M+H]+ C21H40O4 NIST 1193237	-	265.253			811.8	1239									2.47	2.47									0.7	0.64
164	*	ISF of Monoelaidin [M+H]+ C21H40O4 NIST 1193238---Monoelaidin [M+H]+ C21H40O4 NIST 1193237	-	339.289	1889.9		1807.1	2776.4	3476.5						2.48		2.47	2.47	2.46						0.61		0.77	0.82	0.81
164	*	ISF of Monoelaidin [M+H]+ C21H40O4 NIST 1193238---Monoelaidin [M+H]+ C21H40O4 NIST 1193237	-	247.242	168.6			271							2.48			2.47							0.6			0.71
164	*	Monoelaidin [M+H]+ C21H40O4 NIST 1193237---Monoelaidin [M+H]+ C21H40O4 NIST 1193238	M+H 1+	357.3	5839.7	932	5345	9009.3	11678.6						2.48	2.48	2.47	2.47	2.46						0.85	0.65	0.84	0.86	0.85
165		1-Monostearin C21H42O4---Glycerol 1-stearate [M+H]+ C21H42O4 NIST 1060650---Glycerol 1-stearate [M+H]+ C21H42O4 NIST 1060651---Glycerol 1-stearate [M+H]+ C21H42O4 NIST 1060654---Glycerol 1-stearate [M+H]+ C21H42O4 NIST 1060655	M+H 1+	359.315	414.6		383.7	377.7	477.5	388.8	344.6	382.2	350.2	352.4	2.76		2.76	2.77	2.77	2.77	2.77	2.78	2.77	2.76	0.6		0.73	0.76	0.75	0.53	0.51	0.71	0.68	0.76
166		.beta.-Gentiobiose [M+H-H2O]+ C12H22O11 NIST 1076372---.beta.-Gentiobiose [M+H-H2O]+ C12H22O11 NIST 1076373---D-(+)-Cellobiose [M+H-H2O]+ C12H22O11 NIST 1074505---Lactulose [M+H-H2O]+ C12H22O11 NIST 1070337---Maltose [M+H-H2O]+ C12H22O11 NIST 1070570---Sucrose [M+H-H2O]+ C12H22O11 NIST 1069670	M+NH4 1+	360.15	242.5	241.3	237.9	251.1	232.4	246.4	243.7	234.7	234	247.4	9.73	9.72	9.73	9.74	9.73	9.73	9.73	9.73	9.72	9.74	0.92	0.94	0.96	0.97	0.96	0.94	0.76	0.97	0.91	0.92
167		Octocrylene C24H27NO2	M+H 1+	362.211							61.1		63.9								2.09		2.08								0.56		0.7
168		(.+/-.)-10-Hydroxy-4Z,7Z,11E,13Z,16Z,19Z-docosahexaenoic acid [M+H-H2O]+ C22H32O3 NIST 1135972	M+NH4 1+	362.269					59.1										1.7										0.52
169		Sucrose [M+Na]+ C12H22O11 NIST 1069694---Trehalose; LC-ESI-ITFT; MS2; CE 20 eV; [M+Na]+ C12H22O11	M+Na 1+	365.105	348.6		317.8	347.6	302.7	309.9	325.8	318			9.73		9.71	9.72	9.71	9.71	9.71	9.71			0.87		0.92	0.92	0.94	0.92	0.88	0.87
170		Monoarachidin [M+H-H2O]+ C23H46O4 NIST 1185734---Monoarachidin [M+H-H2O]+ C23H46O4 NIST 1185735	M-H2O+H 1+	369.336		86.1	114.8		102							3.23	3.25		3.25							0.55	0.59		0.58
171		Cholestan-3-one, (5.alpha.)- [M+H]+ C27H46O NIST 1060017	M-H2O+H 1+	369.351								1766.9		125.8								6.62		5.9								0.57		0.51
172		Cholestan-3-one, (5.alpha.)- [M+H]+ C27H46O NIST 1060016---Cholesterol C27H46O	M-H2O+H 1+	369.351	6839.4	2600.5,4887.9	7297.3		942.6	5878.8	2851.7		9929.6,2429.4	5259.0,394.5	6.75	3.72,6.67	6.74		5.57	6.6	6.74		6.73,3.72	6.74,4.02	0.65	0.52,0.52	0.51		0.59	0.67	0.66		0.61,0.61	0.50,0.58
173		Cholestan-3-one, (5.alpha.)- [M+H]+ C27H46O NIST 1060018	M-H2O+H 1+	369.351	2683.5		2429.7	2694.0,9875.9	12210.8,2526.3	2808.2,3953.8	2328.5	2399		2737	3.72		3.71	3.72,6.73	6.67,3.72	3.72,6.74	3.71	3.71		3.72	0.63		0.71	0.61,0.71	0.61,0.64	0.60,0.62	0.6	0.6		0.6
174		Monolinolenin (9c,12c,15c) [M+H]+ C21H36O4 NIST 1185830	M+NH4 1+	370.293					210.2										1.94										0.56
175		Hexanedioic acid, bis(2-ethylhexyl) ester [M+H]+ C22H42O4 NIST 1152993---Hexanedioic acid, bis(2-ethylhexyl) ester [M+H]+ C22H42O4 NIST 1152994	M+H 1+	371.315	12604.9	14983.3	4129.5	3560.7	3366.3	2261.1	1972.4	2009.2	2749.7	2299	2.91	2.92	2.91	2.9	2.9	2.91	2.9	2.9	2.9	2.91	0.98	0.98	0.97	0.97	0.97	0.99	0.96	0.92	0.97	0.95
176		1-Linoleoylglycerol [M+H]+ C21H38O4 NIST 1219314	M+NH4 1+	372.312	1503.8		837.2		2266.2						2.2		2.19		2.2						0.73		0.71		0.71
177		Docosahexaenoic acid ethyl ester [M+H]+ C24H36O2 NIST 1220665	M+NH4 1+	374.307		532.3		71.7								2.94		2.94								0.84		0.65
178		Monoelaidin [M+H]+ C21H40O4 NIST 1193238	M+NH4 1+	374.326	1343.8	232.9	1235.1	1938.2	2586.3						2.48	2.48	2.47	2.47	2.49						0.87	0.86	0.87	0.87	0.87
179		Lithocholic acid [M+H-H2O]+ C24H40O3 NIST 1127640	M 1+	376.297					418.9										3.07										0.61
180		Glycerol 1-stearate [M+H]+ C21H42O4 NIST 1060650	M+NH4 1+	376.342						60.9	60.7									2.77	2.77									0.86	0.79
181		Octocrylene C24H27NO2	M+NH4 1+	379.238			135.3			94.3			74.4				2.08			2.08			2.08				0.84			0.88			0.92
182		Cholesterol, 7-oxo- [M+H]+ C27H44O2 NIST 1060023---Cholesterol, 7-oxo- [M+H]+ C27H44O2 NIST 1060031	M-H2O+H 1+	383.33		145.9		201.8								5.76		5.77								0.53		0.62
183		Cholesta-4,6-dien-3-one [M+H]+ C27H42O NIST 1168107	M+H 1+	383.333					185.9			79.8							5.58			3.46							0.56			0.73
184		5S,12R-Dihydroxy-6Z,8E,10E,14Z-eicosatetraene-1,20-dioic acid [M+H-H2O]+ C20H30O6 NIST 1135302	M+NH4 1+	384.238					348.3										0.44										0.52
185		Cholesta-5,8(9)-dien-3.beta.-ol [M+H-H2O]+ C27H44O NIST 1149171	M+H 1+	385.343			206.7					550.6					3.03					2.93					0.72					0.71
186		4-Cholesten-3-one C27H44O---Desmosterol C27H44O	M+H 1+	385.343	100.6					65.6		168.2		137.2	3.58					3.6		3.56		3.59	0.67					0.58		0.7		0.64
186		Cholest-5-ene-3.beta.,4.beta.-diol [M+H-H2O]+ C27H46O2 NIST 1148309---Cholest-5-ene-3.beta.,4.beta.-diol [M+H-H2O]+ C27H46O2 NIST 1148310---Cholest-5-ene-3.beta.,4.beta.-diol [M+H-H2O]+ C27H46O2 NIST 1148314	M-H2O+H 1+	385.345		148.2	136.2	204.3	178							3.57	3.56	3.57	3.57							0.7	0.71	0.73	0.73
187		9-Oxo-11R,15S,19R-trihydroxy-5Z,13E-prostadienoic acid [M+H-H2O]+ C20H32O6 NIST 1219183---9-Oxo-11R,15S,19R-trihydroxy-5Z,13E-prostadienoic acid [M+H-H2O]+ C20H32O6 NIST 1219185---9-Oxo-11R,15S,19R-trihydroxy-5Z,13E-prostadienoic acid [M+H-H2O]+ C20H32O6 NIST 1219186	M+NH4 1+	386.253			378.2	464.9	813.6								0.47	0.53	0.53								0.52	0.58	0.51
188		Hexanedioic acid, bis(2-ethylhexyl) ester [M+H]+ C22H42O4 NIST 1152992	M+NH4 1+	388.341	764.9	843.2		216.9	224.5	149	114	133.8	184.2	143.5	2.91	2.92		2.9	2.9	2.91	2.9	2.9	2.9	2.91	0.98	0.98		0.98	0.97	0.97	0.98	0.97	0.98	0.98
189		Cys-Leu-Arg [M+H]+ C15H30N6O4S NIST 1091781	M+H 1+	391.209				324.8	569.1									0.42	0.42									0.74	0.74
190	*	Dioctyl phthalate [M+H]+ C24H38O4 NIST 1153070	M+H 1+	391.284	31281.3	33099.1	30638	35646.6	34607.5	39328.4	34507.3	31936.5	34747	35517.9	2.86	2.87	2.86	2.88	2.88	2.87	2.88	2.86	2.88	2.87	0.96	0.96	0.96	0.96	0.96	0.96	0.96	0.97	0.96	0.96
190	*	ISF of Dioctyl phthalate [M+H]+ C24H38O4 NIST 1153070	-	149.023	13437.9	16817.6		18201	16291.8	15879.6	17550.1	22599.5	7835.8	14501.4	2.86	2.87		2.88	2.88	2.87	2.88	2.84	2.86	2.87	0.7	0.68		0.7	0.7	0.7	0.7	0.69	0.69	0.69
191		Lys-Thr-Lys [M+H]+ C16H33N5O5 NIST 1093949	M+NH4 1+	393.287			5885.2						3354	6720			0.6						0.59	0.6			0.5						0.51	0.5
192		15(S)-15-Methylprostaglandin F2.alpha. ethyl amide [M+H-H2O]+ C23H41NO4 NIST 1141186	M+H 1+	396.31					184.3										2.16										0.55
193		Tris(2-butoxyethyl) phosphate [M+H]+ C18H39O7P NIST 1147567	M+H 1+	399.248						266	329.3									1.49	1.5									0.58	0.51
194		Palmitoyl-L-carnitine cation [Cat]+ C23H46NO4 NIST 1058285	M 1+	400.343		394.4	649.8	567					419.4	330.1		1.69	1.68	1.68					1.7	1.69		0.94	0.91	0.88					0.85	0.9
194		Palmitoylcarnitine [2M+H]+ C23H45NO4 NIST 1152368---Palmitoylcarnitine [M+H]+ C23H45NO4 NIST 1152361	M+H 1+	400.343	461.3				496.9	198.5		347.2			1.69				1.68	1.68		1.69			0.91				0.91	0.82		0.87
195		5.alpha.-Hydroxy-6-ketocholesterol [M+H]+ C27H46O3 NIST 1216304	M-H2O+H 1+	401.341	363.6	800.2	778.4	545.3	713.1		224	1001.5		630.1	2.78	2.76	2.78	2.77	2.77		2.77	2.78		2.76	0.64	0.89	0.89	0.82	0.85		0.77	0.94		0.76
195		Cholesterol, 7-oxo- [M+H]+ C27H44O2 NIST 1060026---MLS001333092-01!5-Cholesten-3beta-ol-7-one566-28-9 C27H44O2	M+H 1+	401.341						209			351.8							2.77			2.77							0.7			0.87
196		AMP-Deoxynojirimycin [M+H]+ C22H39NO5 NIST 1206953	M+Li 1+	404.299			37.2										1.19										0.53
197		Cholestan-3-one, (5.alpha.)- [M+H]+ C27H46O NIST 1060018---Cholesterol C27H46O	M+NH4 1+	404.388	140.6	155.7	127	159.6	139.8	214.8	133.5	107.6	152.8	140.2	3.7	3.72	3.71	3.72	3.72	3.72	3.71	3.71	3.7	3.69	0.76	0.66	0.7	0.64	0.74	0.55	0.7	0.72	0.67	0.69
198		Dioctyl Phthalate C24H38O4---Dioctyl phthalate [M+H]+ C24H38O4 NIST 1153067	M+NH4 1+	408.311								335.1	354.2									2.86	2.86									0.96	0.92
199		Dioctyl phthalate [M+H]+ C24H38O4 NIST 1153064	M+NH4 1+	408.311		69.4										3.42										0.92
200		16-Phenoxy tetranor prostaglandin F2.alpha. methyl amide [M+H]+ C23H33NO5 NIST 1141568	M+Li 1+	410.254					957.2										0.53										0.64
201		CAY10408 [M+H-H2O]+ C23H36O5 NIST 1221612	M+NH4 1+	410.288				102										0.47										0.56
202		Dioctyl phthalate [M+Na]+ C24H38O4 NIST 1153085	M+Na 1+	413.266				1223.5,2928.2	2235.7	1768.5	1218.7	1088.8	1518.1					4.43,5.12	3.09	6.85	4.33	6.75	4.55					0.80,0.87	0.85	0.87	0.89	0.82	0.86
203		Diisooctyl phthalate [M+Na]+ C24H38O4 NIST 1152935	M+Na 1+	413.266	6008.3				1094.7	3879.7		1570.5			5.12				6.87	4.33		6.85			0.86				0.83	0.9		0.8
204		Dioctyl phthalate [M+Na]+ C24H38O4 NIST 1153089	M+Na 1+	413.266		4652.8	831.8	1277.5	813		1471.1	4195.2	2982.8	1124.3		6.96	4.35	7.01	4.81		4.58	4.29	7.05	6.87		0.79	0.83	0.92	0.78		0.88	0.84	0.88	0.88
205		Dioctyl phthalate [M+Na]+ C24H38O4 NIST 1153083	M+Na 1+	413.266	4842	5711	4885.5	5095.5		7534.7	7086.8	5237.4	6666.2	5240.8	7.12	2.87	2.89	2.88		2.87	2.88	2.88	2.88	2.87	0.78	0.93	0.93	0.92		0.91	0.9	0.85	0.89	0.87
206		Dioctyl phthalate [M+Na]+ C24H38O4 NIST 1153084	M+Na 1+	413.266	5822.7			1629.1	4370.8					1059.7	2.86			7.15	2.88					4.44	0.89			0.82	0.89					0.92
207		Diisooctyl phthalate [M+Na]+ C24H38O4 NIST 1152934	M+Na 1+	413.266	330.1				551.1		1303.2			615	3.97				6.72		4.39			6.75	0.55				0.63		0.87			0.76
208		Diisooctyl phthalate [M+Na]+ C24H38O4 NIST 1152936	M+Na 1+	413.266	642.5	3607.3	1310.8							1013.8	4.34	4.29	6.85							4.56	0.88	0.91	0.68							0.8
209		NCGC00347704-02_C24H32O7_2H-Oxireno[1,10a]phenanthro[3,2-b]furan-10(11bH)-one, 5,7-bis(acetyloxy)-3,3a,4,5,6,7,7a,7b,8,8a-decahydro-4,4,7a,11-tetramethyl-, (1aS,3aR,5S,7S,7aR,7bS,8aR,11bR)- C24H32O7---NCGC00385811-01!6-[3-[(3,4-dimethoxyphenyl)methyl]-4-methoxy-2-(methoxymethyl)butyl]-4-methoxy-1,3-benzodioxole C24H32O7	M-H2O+H 1+	415.211	6405.4	209.1	487.1	344.6		5132.6	5928.1	8885.2	1450.3	1748.1	0.72	0.7	0.4	0.68		0.72	0.72	0.71	0.72	0.72	0.94	0.87	0.81	0.84		0.94	0.93	0.95	0.91	0.93
210		NCGC00381199-01_C25H38O4_(3aR,5E,7S,10E,14E,16aS)-2,7-Dihydroxy-3-[(2S)-1-hydroxy-2-propanyl]-6,10,14,16a-tetramethyl-4,7,8,9,12,13,16,16a-octahydrocyclopenta[15]annulen-1(3aH)-one C25H38O4	M+NH4 1+	420.311				361										2.12										0.61
211		Palmitoylcarnitine [M+H]+ C23H45NO4 NIST 1152363	M+Na 1+	422.326	88.5	169.9	310.3		218.8						1.18	1.18	1.19		1.19						0.79	0.54	0.77		0.57
212		Oleoyl L-carnitine [2M+H]+ C25H47NO4 NIST 1152401---Oleoyl L-carnitine [M+H]+ C25H47NO4 NIST 1152384---Oleoyl L-carnitine [M+H]+ C25H47NO4 NIST 1152385	M+H 1+	426.358	1134.9	1998.1	4288.3	2732.9	2757.7	411.3	243.9	554.3	914.7	694	1.79	1.81	1.81	1.8	1.81	1.81	1.81	1.8	1.8	1.8	0.89	0.95	0.95	0.98	0.97	0.85	0.7	0.83	0.91	0.85
213		Decanedioic acid, bis(2-ethylhexyl) ester [M+H]+ C26H50O4 NIST 1152966---Dioctyl sebacate [M+H]+ C26H50O4 NIST 1186613	M+H 1+	427.378	427.6			415.9							3.99			3.7							0.62			0.75
214		Decanedioic acid, bis(2-ethylhexyl) ester [M+H]+ C26H50O4 NIST 1152967---Decanedioic acid, bis(2-ethylhexyl) ester [M+H]+ C26H50O4 NIST 1152968	M+H 1+	427.377	1173.2	1095	1072.9	1042.2	1119.5	1154.1	1027.9	1029.2	1038.3	1066.8	3.51	3.51	3.5	3.51	3.5	3.51	3.5	3.5	3.51	3.5	0.8	0.89	0.85	0.83	0.85	0.84	0.9	0.89	0.88	0.86
215		Monoerucin [M+H-H2O]+ C25H48O4 NIST 1193279	M+NH4 1+	430.388					121.9										2.92										0.79
216		1-Octadecyl lysophosphatidic acid [M+H]+ C21H45O6P NIST 1216838	M+Li 1+	431.313					194.1	85.1									2.73	2.71									0.54	0.66
217		Heptapropylene glycol [M+H]+ C21H44O8 NIST 1110804	M+NH4 1+	442.337							329.1										4.08										0.69
218		Decanedioic acid, bis(2-ethylhexyl) ester [M+H]+ C26H50O4 NIST 1152966---Decanedioic acid, bis(2-ethylhexyl) ester [M+H]+ C26H50O4 NIST 1152967	M+NH4 1+	444.404	233.6	217	201.8	212	229.1	237	151.4	210.6	168.8	223.8	3.51	3.51	3.5	3.51	3.5	3.51	3.5	3.5	3.49	3.5	0.88	0.91	0.9	0.95	0.9	0.91	0.93	0.93	0.9	0.91
219		NCGC00169629-02_C27H28N2O4_Benzenepropanamide, N-[2-(acetyloxy)-1-(phenylmethyl)ethyl]-alpha-(benzoylamino)- C27H28N2O4	M+H 1+	445.211						11.3				50.2						0.65				0.64						0.57				0.7
220		Diisodecyl phthalate [M+H]+ C28H46O4 NIST 1153101---Diisodecyl phthalate [M+H]+ C28H46O4 NIST 1153102	M+H 1+	447.346	706.7	854.2	687.7,729.6	745.2	684.3	796.7	837.1	798.2	603.6	833.4	3.49	3.48	7.26,3.50	3.51	3.5	3.51	3.52	3.52	3.51	3.5	0.81	0.83	0.74,0.78	0.74	0.79	0.77	0.76	0.71	0.73	0.69
221		Oleoyl L-carnitine [2M+H]+ C25H47NO4 NIST 1152405---Oleoyl L-carnitine [M+H]+ C25H47NO4 NIST 1152387	M+Na 1+	448.342	197	211.5	326.1	203.4	408.9	144.9			192.7		1.48	1.48	1.49	1.49	1.49	1.47			1.49		0.61	0.52	0.71	0.57	0.67	0.56			0.58
222		lysoPE 16:1; [M+H]+; PE(16:1(7Z)/0:0) C21H42NO7P---lysoPE 16:1; [M+H]+; PE(16:1(9Z)/0:0) C21H42NO7P	M+H 1+	452.276				61.4										1.44										0.64
223		1-Hexadecanoyl-sn-glycero-3-phosphoethanolamine [M+H]+ C21H44NO7P NIST 1035364---1-Hexadecanoyl-sn-glycero-3-phosphoethanolamine [M+H]+ C21H44NO7P NIST 1035365---1-Hexadecanoyl-sn-glycero-3-phosphoethanolamine [M+H]+ C21H44NO7P NIST 1035366---1-Palmitoyl-2-hydroxy-sn-glycero-3-phosphoethanolamine [M+H]+ C21H44NO7P NIST 1151362---1-Palmitoyl-2-hydroxy-sn-glycero-3-phosphoethanolamine [M+H]+ C21H44…	M+H 1+	454.293	540.5	527.6	460.4	602	967.9	126.1	119.1	195.1	250.3	254.1	1.84	1.83	1.85	1.85	1.85	1.85	1.86	1.82	1.84	1.84	0.9	0.87	0.88	0.92	0.9	0.86	0.75	0.77	0.88	0.81
224		1-Myristoyl-sn-glycero-3-phosphocholine [M+H]+ C22H46NO7P NIST 1058237---1-Myristoyl-sn-glycero-3-phosphocholine [M+H]+ C22H46NO7P NIST 1058238---1-Myristoyl-sn-glycero-3-phosphocholine [M+H]+ C22H46NO7P NIST 1058242---1-Myristoyl-sn-glycero-3-phosphocholine [M+H]+ C22H46NO7P NIST 1058243---1-Myristoyl-sn-glycero-3-phosphocholine [M+H]+ C22H46NO7P NIST 1178440---1-Myristoyl-sn-glycero-3-phosphoch…	M+H 1+	468.309	58.8	76.7	75.3	51.5	66.2	31	27.9	35	66.9	40.4	1.24	1.22	1.23	1.23	1.24	1.24	1.25	1.25	1.23	1.23	0.83	0.93	0.9	0.88	0.85	0.91	0.79	0.84	0.95	0.92
225		NCGC00386050-01!(2S,3S,4S,5R,6S)-3,4,5-trihydroxy-6-[5-hydroxy-6-methoxy-2-(4-methoxyphenyl)-4-oxochromen-7-yl]oxyoxane-2-carboxylic acid C23H22O12	M-H2O+H 1+	473.102	142	45.9		28.2							2.7	2.7		2.69							0.76	0.8		0.78
226		.alpha.-Tocopheryl acetate [M+H]+ C31H52O3 NIST 1059730	M+H 1+	473.398			146.6	129.3			142.4			153.6			4.3	4.31			4.3			4.31			0.71	0.71			0.67			0.64
227		1-Hexadecanoyl-sn-glycero-3-phosphoethanolamine [M+Na]+ C21H44NO7P NIST 1035375---1-Hexadecanoyl-sn-glycero-3-phosphoethanolamine [M+Na]+ C21H44NO7P NIST 1035376---1-Hexadecanoyl-sn-glycero-3-phosphoethanolamine [M+Na]+ C21H44NO7P NIST 1035377---1-Palmitoyl-2-hydroxy-sn-glycero-3-phosphoethanolamine [M+Na]+ C21H44NO7P NIST 1151390---1-Palmitoyl-2-hydroxy-sn-glycero-3-phosphoethanolamine [M+Na]+ C…	M+Na 1+	476.274		47.6	32.2	48.8	63.2				20.1			1.83	1.85	1.85	1.85				1.85			0.82	0.7	0.8	0.85				0.7
228		NCGC00380283-01!4-[5-[[4-[5-[acetyl(hydroxy)amino]pentylamino]-4-oxobutanoyl]-hydroxyamino]pentylamino]-4-oxobutanoic acid C20H36N4O8	M+NH4 1+	478.293	430.6	1170	384.8	209.6	1404.1	42.4		110.5	67.9		1.56	1.54	1.55	1.55	1.55	1.54		1.54	1.55		0.89	0.89	0.81	0.76	0.89	0.56		0.71	0.6
229		1-(9Z-Octadecenoyl)-sn-glycero-3-phosphoethanolamine [M+H]+ C23H46NO7P NIST 1149910---1-(9Z-Octadecenoyl)-sn-glycero-3-phosphoethanolamine [M+H]+ C23H46NO7P NIST 1149911---LPE 18:1; PlaSMA ID-2600 C23H46NO7P	M+H 1+	480.308	869.2	705.3	649.6	743.5	1259.2	105.1	66.3	266.5		177.9	1.94	1.94	1.95	1.95	1.96	1.96	1.96	1.91		1.95	0.87	0.81	0.78	0.82	0.86	0.72	0.63	0.79		0.67
230		1-Octadecanoyl-sn-glycero-3-phosphoethanolamine [M+H]+ C23H48NO7P NIST 1035457---1-Stearoyl-2-hydroxy-sn-glycero-3-phosphoethanolamine [M+H]+ C23H48NO7P NIST 1151438---1-Stearoyl-2-hydroxy-sn-glycero-3-phosphoethanolamine [M+H]+ C23H48NO7P NIST 1151439	M+H 1+	482.324	669.7	490	531.9	641.1	1222.3	136.7	86	234.2	235.2	246.3	2.29	2.31	2.3	2.3	2.29	2.31	2.29	2.3	2.31	2.29	0.91	0.86	0.9	0.93	0.94	0.87	0.72	0.85	0.83	0.89
231		1-Pentadecanoyl-sn-glycero-3-phosphocholine [M+H]+ C23H48NO7P NIST 1150945---1-Pentadecanoyl-sn-glycero-3-phosphocholine [M+H]+ C23H48NO7P NIST 1150946---1-Pentadecanoyl-sn-glycero-3-phosphocholine [M+H]+ C23H48NO7P NIST 1150947---lysoPC 15:0; [M+H]+; PC(15:0/0:0) C23H48NO7P	M+H 1+	482.326		70.7	91.1	45.9	118.8	44.7			77	57.3		1.54	1.51	1.53	1.53	1.51			1.53	1.52		0.85	0.88	0.86	0.85	0.65			0.86	0.81
232		1-Hexadecyl-sn-glycero-3-phosphocholine [M+H]+ C24H52NO6P NIST 1105204---1-Hexadecyl-sn-glycero-3-phosphocholine [M+H]+ C24H52NO6P NIST 1105205---1-Hexadecyl-sn-glycero-3-phosphocholine [M+H]+ C24H52NO6P NIST 1105207---1-Hexadecyl-sn-glycero-3-phosphocholine [M+H]+ C24H52NO6P NIST 1105208	M+H 1+	482.36	68.4	74.2	111.1	105.6	135.6	47	39.5	42.1	115.4	79.4	1.99	1.99	1.98	1.97	1.98	1.98	1.98	1.97	1.97	1.97	0.72	0.73	0.85	0.72	0.86	0.57	0.55	0.66	0.89	0.61
233		NCGC00347703-02_C30H44O5_Lup-20(29)-ene-27,28-dioic acid, 3-oxo-, (5xi,9xi,18xi)- C30H44O5	M+H 1+	485.326									116.9										0.38										0.55
234		.alpha.-Tocopheryl acetate [M+H]+ C31H52O3 NIST 1059730	M+NH4 1+	490.425		215.3	217.8	223.5	239.9	228.4	230.7	228.1	227.2	232		4.31	4.3	4.31	4.31	4.31	4.3	4.31	4.3	4.31		0.67	0.69	0.77	0.72	0.74	0.69	0.72	0.72	0.69
235		PC 16:1e; PC 14:1e/2:0; [M+H]+ C24H48NO7P---lysoPC 16:1; [M+H]+; PC(16:1(7Z)/0:0) C24H48NO7P---lysoPC 16:1; [M+H]+; PC(16:1(9Z)/0:0) C24H48NO7P	M+H 1+	494.324	878.1	2231.9	1146.7	886.1	2022.7	198.2	163.1	108.6	393.4	279.7	1.37	1.31	1.36	1.36	1.34	1.39	1.39	1.39	1.38	1.4	0.92	0.93	0.92	0.93	0.93	0.92	0.75	0.65	0.94	0.93
236	*	ISF of PC 16:0e; PC 14:0e/2:0; [M+H]+ C24H50NO7P---Lyso-PC(16:0) [M+H]+ C24H50NO7P NIST 1115241---LPC 16:0; [M+H]+ C24H50NO7P---Unknown (carbon number 24); PlaSMA ID-2661 C24H50NO7P---LysoPhosphatidylcholine_16_0 C24H50NO7P	-	478.328	83.6	82.3			165.9					85.9	1.79	1.79			1.79					1.78	0.61	0.68			0.6					0.67
236	*	LPC 16:0; [M+H]+ C24H50NO7P---Lyso-PC(16:0) [M+H]+ C24H50NO7P NIST 1115241---LysoPhosphatidylcholine_16_0 C24H50NO7P---PC 16:0e; PC 14:0e/2:0; [M+H]+ C24H50NO7P---Unknown (carbon number 24); PlaSMA ID-2661 C24H50NO7P	M+H 1+	496.34	15827.9	17064.7	22168.9	22375.1	33884.4	6558.7	5197.6	5494.3	18769.3	15091	1.79	1.79	1.78	1.78	1.79	1.79	1.79	1.78	1.78	1.78	0.97	0.97	0.97	0.97	0.98	0.97	0.97	0.98	0.97	0.97
237		1-Pentadecanoyl-sn-glycero-3-phosphocholine [M+H]+ C23H48NO7P NIST 1150947	M+NH4 1+	499.352						82.8										1.81										0.56
238		1-(9Z-Octadecenoyl)-sn-glycero-3-phosphoethanolamine [M+Na]+ C23H46NO7P NIST 1149932---1-(9Z-Octadecenoyl)-sn-glycero-3-phosphoethanolamine [M+Na]+ C23H46NO7P NIST 1149933---1-(9Z-Octadecenoyl)-sn-glycero-3-phosphoethanolamine [M+Na]+ C23H46NO7P NIST 1149941	M+Na 1+	502.291	70.8	62.8	53.9	64.2	113.9						1.94	1.98	1.95	1.95	1.96						0.82	0.64	0.79	0.75	0.81
239		LPC 17:1; [M+H]+ C25H50NO7P---lysoPC 17:1; [M+H]+; PC(17:1(9Z)/0:0) C25H50NO7P	M+H 1+	508.338	109.3	237.9		97.7		36.9			70.4		1.62	1.58		1.65		1.66			1.65		0.99	0.89		0.62		0.74			0.92
240		1-(1Z-Octadecenyl)-sn-glycero-3-phosphocholine [M+H]+ C26H54NO6P NIST 1150779---1-(1Z-Octadecenyl)-sn-glycero-3-phosphocholine [M+H]+ C26H54NO6P NIST 1150781---lysoPC 18:0; [M+H]+; PC(P-18:0/0:0) C26H54NO6P	M+H 1+	508.375	72	67.7	123.2	135.3	112.6	34.6			48	38.6	2.07	2.07	2.06	2.08	2.07	2.06			2.06	2.08	0.79	0.53	0.66	0.73	0.83	0.74			0.76	0.78
241		1-Heptadecanoyl-sn-glycero-3-phosphocholine [M+H]+ C25H52NO7P NIST 1151006---1-Heptadecanoyl-sn-glycero-3-phosphocholine [M+H]+ C25H52NO7P NIST 1151007---1-Heptadecanoyl-sn-glycero-3-phosphocholine [M+H]+ C25H52NO7P NIST 1151008---1-Heptadecanoyl-sn-glycero-3-phosphocholine [M+H]+ C25H52NO7P NIST 1151009---lysoPC 17:0; [M+H]+; PC(17:0/0:0) C25H52NO7P	M+H 1+	510.355	288.9		319.2	247.7	576	146.9		128.7	362.7	241.1	2.01		2	2	2	2.02		2.02	2.01	2.01	0.94		0.8	0.87	0.92	0.86		0.83	0.87	0.86
242		Lyso-PAF C-18 [M+H]+ C26H56NO6P NIST 1105249---Lyso-PAF C-18 [M+H]+ C26H56NO6P NIST 1105253---Lyso-PAF C-18 [M+H]+ C26H56NO6P NIST 1105255	M+H 1+	510.392			69			29.2			54.3				2.41			2.41			2.41				0.8			0.56			0.73
243		1-Hexadecanoyl-sn-glycero-3-phosphocholine [M+Na]+ C24H50NO7P NIST 1035312---1-Hexadecanoyl-sn-glycero-3-phosphocholine [M+Na]+ C24H50NO7P NIST 1035313---1-Hexadecanoyl-sn-glycero-3-phosphocholine [M+Na]+ C24H50NO7P NIST 1035314	M+Na 1+	518.322	584.4	685.5	1020.4	898.7	1580.7	215.1	171.5	277.1	675	605.9	1.79	1.79	1.78	1.78	1.79	1.79	1.79	1.78	1.78	1.78	0.93	0.93	0.94	0.93	0.94	0.94	0.89	0.89	0.93	0.94
244		LPC 18:3; PlaSMA ID-2742 C26H48NO7P	M+H 1+	518.324		729.9	177.4		461.8					43.7		1.7	0.56		0.58					1.28		0.69	0.69		0.9					0.73
245		Unknown (carbon number 26); PlaSMA ID-2741 C26H48NO7P	M+H 1+	518.324		514.2										0.56										0.86
246		LPC 18:3; [M+H]+ C26H48NO7P---lysoPC 18:3; [M+H]+; PC(18:3(6Z,9Z,12Z)/0:0) C26H48NO7P---lysoPC 18:3; [M+H]+; PC(18:3(9Z,12Z,15Z)/0:0) C26H48NO7P	M+H 1+	518.324	451.9	1605.7	563.5	243.8	1583.6		39.7			40.9	1.22	1.22	1.21	1.21	1.22		1.24			1.23	0.88	0.89	0.9	0.9	0.9		0.97			0.93
246		Lyso-PC(16:0) [M+H]+ C24H50NO7P NIST 1115244	M+Na 1+	518.323						50.6										1.24										0.83
247		LPC 18:2; PlaSMA ID-2753 C26H50NO7P---PC 18:2e; PC 16:2e/2:0; [M+H]+ C26H50NO7P	M+H 1+	520.34	25678.4	118526	30322.4	12160.7	112858	2005.9	1668.4	1383.8	4540.7	2134	1.48	1.48	1.47	1.47	1.47	1.49	1.5	1.52	1.51	1.5	0.93	0.94	0.93	0.93	0.94	0.93	0.94	0.94	0.93	0.94
248		LPC 18:1; PlaSMA ID-2759 C26H52NO7P---LPC 18:1; [M+H]+ C26H52NO7P---PC 18:1e; PC 14:1e/4:0; [M+H]+ C26H52NO7P---PC 18:1e; PC 16:1e/2:0; [M+H]+ C26H52NO7P	M+H 1+	522.356	5260.9	15818.5	7827.8	6560	16421.5	1421.4	1236.7	906.6	3358.3	2097.2	1.84	1.81	1.83	1.85	1.83	1.87	1.86	1.87	1.87	1.86	0.93	0.93	0.93	0.93	0.94	0.9	0.9	0.91	0.96	0.94
249		PAF C-16 [M+H]+ C26H54NO7P NIST 1105165	M 1+	523.359		130.1										2.5										0.61
250		lysoPE 20:4; [M+Na]+; PE(20:4(5E,8E,11E,14E)/0:0) C25H44NO7P---lysoPE 20:4; [M+Na]+; PE(20:4(5Z,8Z,11Z,14Z)/0:0) C25H44NO7P---lysoPE 20:4; [M+Na]+; PE(20:4(7E,10E,13E,16E)/0:0) C25H44NO7P	M+Na 1+	524.274	63.2	128.8									1.54	1.54									0.52	0.66
251	*	1-Stearoyl-2-hydroxy-sn-glycero-3-phosphocholine [M+H]+ C26H54NO7P NIST 1151095---1-Stearoyl-2-hydroxy-sn-glycero-3-phosphocholine [M+H]+ C26H54NO7P NIST 1151096---PAF C-16 [M+H]+ C26H54NO7P NIST 1105165	M+H 1+	524.371	14489.3	8536.2	17303.1	19045.2	27683.2	3343.6	2816.9	3763.5	9331.5	8108	2.24	2.24	2.24	2.23	2.25	2.25	2.23	2.24	2.25	2.25	0.96	0.96	0.96	0.96	0.96	0.96	0.96	0.96	0.96	0.96
251	*	ISF of 1-Stearoyl-2-hydroxy-sn-glycero-3-phosphocholine [M+H]+ C26H54NO7P NIST 1151096---1-Stearoyl-2-hydroxy-sn-glycero-3-phosphocholine [M+H]+ C26H54NO7P NIST 1151095---PAF C-16 [M+H]+ C26H54NO7P NIST 1105165	-	506.361	63			77	99.1						2.24			2.23	2.25						0.64			0.57	0.61
252		1-Heptadecanoyl-sn-glycero-3-phosphocholine [M+H]+ C25H52NO7P NIST 1151009	M+NH4 1+	527.379				160.8										2.25										0.56
253		lysoPC 17:1; [M+H]+; PC(17:1(9Z)/0:0) C25H50NO7P	M+Na 1+	530.318					54.6										1.55										0.55
254		lysoPC 19:0; [M+H]+; PC(19:0/0:0) C27H56NO7P	M+H 1+	538.386		219.6	292.7		452.9	149.9			359.3			2.44	2.43		2.42	2.43			2.43			0.67	0.6		0.77	0.6			0.59
255	*	Cer-NS d34:1; Cer-NS d18:1/16:0; [M+H]+ C34H67NO3	M+H 1+	538.518	722.1	270.5	471	593.5	473.1	317.5	245.7	209.2	558.9	377.2	4.35	4.23	4.22	4.23	4.22	4.23	4.22	4.22	4.22	4.22	0.93	0.95	0.94	0.95	0.95	0.94	0.96	0.95	0.95	0.96
255	*	ISF of Cer-NS d34:1; Cer-NS d18:1/16:0; [M+H]+ C34H67NO3	-	520.508			439.3	581.5	525.3	279.5	231.3	214.6	645.6	379.2			4.22	4.23	4.22	4.23	4.22	4.22	4.22	4.22			0.98	0.99	0.98	0.96	0.94	0.94	0.98	0.97
256		LPC 20:5; [M+H]+ C28H48NO7P	M+H 1+	542.324		1354	280		1233.3							1.18	1.17		1.17							0.91	0.88		0.91
256		Unknown (carbon number 26); PlaSMA ID-2755 C26H50NO7P	M+Na 1+	542.324	320.5		157	192.7			19.3				1.16		0.62	1.17			1.18				0.73		0.65	0.75			0.59
257		lysoPC 20:5; [M+H]+; PC(20:5(5Z,8Z,11Z,14Z,17Z)/0:0) C28H48NO7P	M+H 1+	542.325		364				26.2						0.62				1.17						0.66				0.62
258		plasmenyl-PC 18:0; [M+Na]+; PC(P-16:0/2:0) C26H52NO7P	M+Na 1+	544.338	313.8	801.1	469.1	365	1156.8						1.84	1.81	1.83	1.85	1.83						0.68	0.77	0.78	0.8	0.78
259		1-(9Z-Octadecenoyl)-sn-glycero-3-phosphocholine [M+H]+ C26H52NO7P NIST 1149848	M+Na 1+	544.339								255.3										1.48										0.79
259		LPC 20:4; [M+H]+ C28H50NO7P---lysoPC 20:4; [M+H]+; PC(20:4(5E,8E,11E,14E)/0:0) C28H50NO7P---lysoPC 20:4; [M+H]+; PC(20:4(5Z,8Z,11Z,14Z)/0:0) C28H50NO7P---lysoPC 20:4; [M+H]+; PC(20:4(7E,10E,13E,16E)/0:0) C28H50NO7P	M+H 1+	544.34	16553.9	59106	17824.9	7814	57917.6	884.5	624.9		1540.8	687.2	1.48	1.48	1.47	1.47	1.47	1.47	1.48		1.46	1.46	0.89	0.89	0.9	0.89	0.9	0.91	0.92		0.9	0.89
260		1-Octadecanoyl-sn-glycero-3-phosphocholine [M+Na]+ C26H54NO7P NIST 1035332---1-Octadecanoyl-sn-glycero-3-phosphocholine [M+Na]+ C26H54NO7P NIST 1035333---PAF C-16 [M+Na]+ C26H54NO7P NIST 1105173	M+Na 1+	546.353	4189.6	1223.2	3698.4	4225.3	9006.5	142.8	123.9	280.1	453.5	502.9	2.26	2.26	2.26	2.25	2.25	2.25	2.23	2.24	2.25	2.25	0.94	0.94	0.94	0.93	0.94	0.93	0.91	0.91	0.93	0.93
261		LPC 20:3; [M+H]+ C28H52NO7P	M+H 1+	546.356									246.5										1.65										0.74
261		PAF C-16 [M+H]+ C26H54NO7P NIST 1105162---PAF C-16 [M+H]+ C26H54NO7P NIST 1105163	M+Na 1+	546.356	1790.4	12018.6	2932.7	2457.2	8198.3						1.67	1.66	1.68	1.68	1.66						0.97	0.97	0.97	0.96	0.97
262		2-O-Methyl PAF C-18 [M+H]+ C27H58NO6P NIST 1220955	M+Na 1+	546.396	492.3		140.6	193.6	35.6						1.79		1.95	1.78	1.42						0.59		0.77	0.7	0.59
263		Tri-2-ethylhexyl trimellitate [M+H]+ C33H54O6 NIST 1193696	M+H 1+	547.399	60.6						85.9				4.09						4.1				0.92						0.9
264		Dipalmitolein (9c) [M+H-H2O]+ C35H64O5 NIST 1185907	M-H2O+H 1+	547.472					202.4										6.31										0.59
265		1,2-Didecanoyl PC [M+H]+ C28H56NO8P NIST 1213948---1,2-Didecanoyl PC [M+H]+ C28H56NO8P NIST 1213949---1,2-Didecanoyl PC [M+H]+ C28H56NO8P NIST 1213950	M-H2O+H 1+	548.37		605.6	303.7	234.5	1146.2	90.7	73.3					1.94	1.95	1.95	1.79	2	1.98					0.94	0.9	0.94	0.94	0.72	0.77
265		LPC 20:2; [M+H]+ C28H54NO7P---PC 20:2e; PC 16:2e/4:0; [M+H]+ C28H54NO7P---PC 20:2e; PC 18:2e/2:0; [M+H]+ C28H54NO7P	M+H 1+	548.372	243.4									120.6	1.96									1.99	0.9									0.79
266		lysoPC 22:6; [M+H]+; PC(22:6(4Z,7Z,10Z,13Z,16Z,19Z)/0:0) C30H50NO7P	M-H2O+H 1+	550.329					65.7										1.43										0.57
267		1-O-Hexadecyl-2-O-(2E-butenoyl)-sn-glyceryl-3-phosphocholine [M+H]+ C28H56NO7P NIST 1216026---1-O-Hexadecyl-2-O-(2E-butenoyl)-sn-glyceryl-3-phosphocholine [M+H]+ C28H56NO7P NIST 1216027---lysoPC 20:1; [M+H]+; PC(20:1(11E)/0:0) C28H56NO7P---lysoPC 20:1; [M+H]+; PC(20:1(11Z)/0:0) C28H56NO7P---lysoPC 20:1; [M+H]+; PC(20:1(13E)/0:0) C28H56NO7P---lysoPC 20:1; [M+H]+; PC(20:1(13Z)/0:0) C28H56NO7P	M+H 1+	550.386	348.9	340			660.7	94.9	58.6		216.8	163.9	2.29	2.26			2.29	2.29	2.29		2.29	2.29	0.87	0.87			0.91	0.76	0.65		0.89	0.82
268		lysoPC 22:5; [M+H]+; PC(22:5(4Z,7Z,10Z,13Z,16Z)/0:0) C30H52NO7P---lysoPC 22:5; [M+H]+; PC(22:5(7Z,10Z,13Z,16Z,19Z)/0:0) C30H52NO7P	M-H2O+H 1+	552.337				899.9										0.45										0.82
269		lysoPC 20:3; [M+H]+; PC(20:3(5Z,8Z,11Z)/0:0) C28H52NO7P---lysoPC 20:3; [M+H]+; PC(20:3(8Z,11Z,14Z)/0:0) C28H52NO7P	M+Li 1+	552.366								161.6										2.11										0.63
270		1-Arachidoyl-2-hydroxy-sn-glycero-3-phosphocholine [M+H]+ C28H58NO7P NIST 1151167---1-Arachidoyl-2-hydroxy-sn-glycero-3-phosphocholine [M+H]+ C28H58NO7P NIST 1151168---1-Arachidoyl-2-hydroxy-sn-glycero-3-phosphocholine [M+H]+ C28H58NO7P NIST 1151169---1-Octadecyl-2-acetyl-sn-glycero-3-phosphocholine [M+H]+ C28H58NO7P NIST 1105227---lysoPC 20:0; [M+H]+; PC(20:0/0:0) C28H58NO7P	M+H 1+	552.401	356.8	371	465.6	362	744.6		85.3	119.8	241.5	248.2	2.61	2.61	2.61	2.6	2.6		2.61	2.6	2.6	2.61	0.96	0.93	0.94	0.94	0.93		0.92	0.85	0.91	0.96
271		DAG 30:2; DAG 12:0-18:2; [M+NH4]+ C33H60O5	M+NH4 1+	554.477	134										3.97										0.51
272		DAG 30:1; DAG 14:0-16:1; [M+NH4]+ C33H62O5	M+NH4 1+	556.492	618.8	266.4	488	908.3	735.6		238.8				4.23	4.22	4.22	4.21	4.22		4.24				0.56	0.57	0.62	0.67	0.63		0.56
273		DAG 30:0; DAG 14:0-16:0; [M+NH4]+ C33H64O5	M+NH4 1+	558.507				296.3			124.7	141.6						4.5			4.49	4.48						0.65			0.53	0.51
274		lysoPC 20:4; [M+H]+; PC(20:4(5E,8E,11E,14E)/0:0) C28H50NO7P---lysoPC 20:4; [M+H]+; PC(20:4(5Z,8Z,11Z,14Z)/0:0) C28H50NO7P---lysoPC 20:4; [M+H]+; PC(20:4(7E,10E,13E,16E)/0:0) C28H50NO7P	M+NH4 1+	561.363							27.6										1.77										0.61
275	*	DAG 32:2; DAG 14:0-18:2; [M+NH4]+ C35H64O5---Dipalmitolein (9c) [M+H]+ C35H64O5 NIST 1185893	M+H 1+	565.482			164.2	519.7	368.1								4.28	4.29	4.29								0.7	0.7	0.63
275	*	ISF of DAG 32:2; DAG 14:0-18:2; [M+NH4]+ C35H64O5---Dipalmitolein (9c) [M+H]+ C35H64O5 NIST 1185893	-	547.471			415.6	1078.3	771								4.3	4.29	4.29								0.58	0.78	0.76
276		lysoPC 20:4; [M+H]+; PC(20:4(5E,8E,11E,14E)/0:0) C28H50NO7P---lysoPC 20:4; [M+H]+; PC(20:4(5Z,8Z,11Z,14Z)/0:0) C28H50NO7P---lysoPC 20:4; [M+H]+; PC(20:4(7E,10E,13E,16E)/0:0) C28H50NO7P	M+Na 1+	566.324		73.0,205.8	28.7									1.20,0.60	1.21									0.64,0.68	0.58
277		1,2-Didecanoyl PC [M+H]+ C28H56NO8P NIST 1213948---1,2-Didecanoyl PC [M+H]+ C28H56NO8P NIST 1213949---1,2-Didecanoyl PC [M+H]+ C28H56NO8P NIST 1213950	M+H 1+	566.381			150	143.7	169.3		30	110.8		86.1			2.26	2.25	2.25		2.25	2.24		2.25			0.81	0.83	0.88		0.69	0.57		0.92
278	*	Cer-NS d36:1; Cer-NS d18:1/18:0; [M+H]+ C36H71NO3	M+H 1+	566.551	118.6							619.2			4.58							4.58			0.87							0.93
278	*	ISF of Cer-NS d36:1; Cer-NS d18:1/18:0; [M+H]+ C36H71NO3	-	548.539								478.7										4.58										0.99
279		LPC 22:6; [M+H]+ C30H50NO7P---lysoPC 22:6; [M+H]+; PC(22:6(4Z,7Z,10Z,13Z,16Z,19Z)/0:0) C30H50NO7P	M+H 1+	568.34	6402.3	26698.4	5422.5	2347.3	20627	323.6	212	239.8	559.7	221.9	1.43	1.43	1.45	1.44	1.45	1.45	1.44	1.44	1.44	1.44	0.9	0.9	0.91	0.91	0.91	0.9	0.89	0.9	0.9	0.69
280		LPC 22:5; [M+H]+ C30H52NO7P---lysoPC 22:5; [M+H]+; PC(22:5(4Z,7Z,10Z,13Z,16Z)/0:0) C30H52NO7P---lysoPC 22:5; [M+H]+; PC(22:5(7Z,10Z,13Z,16Z,19Z)/0:0) C30H52NO7P	M+H 1+	570.352	878.8	4296.6	974.8	446.9	3532.1						1.54	1.54	1.55	1.57	1.53						0.79	0.9	0.67	0.8	0.9
281		DAG 31:1; DAG 15:0-16:1; [M+NH4]+ C34H64O5	M+NH4 1+	570.506		174.1					166.2					4.39					4.43					0.52					0.51
282		1-O-Hexadecyl-2-O-(2E-butenoyl)-sn-glyceryl-3-phosphocholine [M+H]+ C28H56NO7P NIST 1216027	M+Na 1+	572.371	138.8	480.1		143.8							1.86	1.86		1.87							0.89	0.9		0.88
282		PC 22:4e; PC 18:4e/4:0; [M+H]+ C30H54NO7P---PC 22:4e; PC 20:4e/2:0; [M+H]+ C30H54NO7P	M+H 1+	572.371					410.1										1.85										0.94
283		DAG 31:0; DAG 15:0-16:0; [M+NH4]+ C34H66O5	M+NH4 1+	572.523							82.1										4.64										0.52
284		Retinol [M+H-H2O]+ C20H30O NIST 1066888	2M+H 1+	573.463						229.4	117.9		502							5.55	5.54		5.55							0.73	0.67		0.78
285		1-Palmitoyl-2-oleoyl-sn-glycerol [M+H-H2O]+ C37H70O5 NIST 1149347---1-Palmitoyl-2-oleoyl-sn-glycerol [M+Na]+ C37H70O5 NIST 1149375	M-H2O+H 1+	577.518		5155	8362.9		13779.4	853.0,311.0	1195.2,260.8	2300.5	2661.5	11114.6		6.59	6.58		6.59	6.64,3.74	6.64,3.75	6.64	6.59	6.6		0.72	0.82		0.82	0.62,0.66	0.71,0.72	0.83	0.67	0.82
286		lysoPC 22:1; [M+H]+; PC(22:1(13Z)/0:0) C30H60NO7P	M+H 1+	578.419	41.6								55.2		2.63								2.65		0.61								0.92
287		1-Behenoyl-2-hydroxy-sn-glycero-3-phosphocholine [M+H]+ C30H62NO7P NIST 1151237---1-Behenoyl-2-hydroxy-sn-glycero-3-phosphocholine [M+H]+ C30H62NO7P NIST 1151239---1-Behenoyl-2-hydroxy-sn-glycero-3-phosphocholine [M+H]+ C30H62NO7P NIST 1151241---lysoPC 22:0; [M+H]+; PC(22:0/0:0) C30H62NO7P	M+H 1+	580.434			141	85.4	167.6	65.4			123.2	109.1			2.93	2.92	2.92	2.93			2.92	2.93			0.83	0.66	0.78	0.55			0.78	0.62
288		DAG 32:3; DAG 14:0-18:3; [M+NH4]+ C35H62O5	M+NH4 1+	580.493	211.9			235.9	135.8						4.05			4.04	4.04						0.58			0.6	0.6
289		DAG 33:1; DAG 15:0-18:1; [M+NH4]+ C36H68O5	M+H 1+	581.512					114.8										4.73										0.52
290		DAG 32:2; DAG 14:0-18:2; [M+NH4]+ C35H64O5---Dipalmitolein (9c) [M+H]+ C35H64O5 NIST 1185901	M+NH4 1+	582.508	4794.3	694.6	3398.3	8299.9	6588.1	561.2	506.4	331.9	1346.2	1119.7	4.29	4.29	4.28	4.29	4.29	4.29	4.3	4.31	4.28	4.29	0.65	0.68	0.69	0.61	0.66	0.61	0.6	0.62	0.61	0.67
291		DAG 32:1; DAG 14:0-18:1; [M+NH4]+ C35H66O5---DAG 32:1; DAG 16:0-16:1; [M+NH4]+ C35H66O5	M+NH4 1+	584.525	3387.9	1961	3966.9,34.0	10926.8	6735.8	648.7	678.6	450.7	1509.1	1724.3	4.56	4.56	4.55,5.03	4.56	4.56	4.56	4.57	4.58	4.55	4.56	0.53	0.55	0.50,0.56	0.57	0.52	0.54	0.6	0.6	0.57	0.6
292		DAG 32:2; DAG 14:0-18:2; [M+NH4]+ C35H64O5	M+Na 1+	587.463					645.8										4.31										0.72
292		DAG 34:5; DAG 14:0-20:5; [M+NH4]+ C37H62O5	M+H 1+	587.464	721.9			948.3							4.31			4.31							0.58			0.57
293		DAG 34:4; DAG 16:1-18:3; [M+NH4]+ C37H64O5	M+H 1+	589.478				474										3.51										0.52
294		DAG 32:1; DAG 16:0-16:1; [M+NH4]+ C35H66O5	M+Na 1+	589.479					1426.2										4.56										0.52
294		DAG 34:4; DAG 14:0-20:4; [M+NH4]+ C37H64O5---DAG 34:4; DAG 16:0-18:4; [M+NH4]+ C37H64O5	M+H 1+	589.48		802.7	1220.9	2189.5								4.56	4.55	4.56								0.64	0.64	0.57
295		DAG 34:3; DAG 16:0-18:3; [M+NH4]+ C37H66O5	M+H 1+	591.495	466.7			752	287.2,557.8					319.3	4.83			4.83	4.83,3.59					4.83	0.82			0.73	0.67,0.70					0.77
296		1-Palmitoyl-2-glutaryl phosphatidylcholine [M+H]+ C29H56NO10P NIST 1217845	M-H2O+H 1+	592.362										120.8										1.78										0.82
297	*	DAG 34:2; DAG 16:0-18:2; [M+NH4]+ C37H68O5	M+H 1+	593.513	1676.1	385.1	1155.8	3805.5	2992.2	188.1	158.1		472.9	553.2	4.65	4.64	4.64	4.64	4.64	4.64	4.64		4.64	4.64	0.61	0.79	0.59	0.55	0.67	0.65	0.52		0.59	0.67
297	*	ISF of DAG 34:2; DAG 16:0-18:2; [M+NH4]+ C37H68O5	-	575.503	4377.2	1009	2886.9	8856.3	7365.2	528.4			1238.3	1554	4.65	4.64	4.64	4.64	4.64	4.66			4.66	4.64	0.82	0.76	0.81	0.82	0.78	0.71			0.79	0.74
297	*	ISF of DAG 34:2; DAG 16:0-18:2; [M+NH4]+ C37H68O5	-	337.273	1549.6	300.4		2157	2507.5						4.67	4.64		4.66	4.66						0.64	0.68		0.58	0.59
297	*	ISF of DAG 34:2; DAG 16:0-18:2; [M+NH4]+ C37H68O5	-	313.274	1348				2567.7						4.65				4.64						0.87				0.87
298		DAG 33:3; DAG 15:0-18:3; [M+NH4]+ C36H64O5	M+NH4 1+	594.508					133.7										4.27										0.59
299	*	Cer-NS d38:1; Cer-NS d18:1/20:0; [M+H]+ C38H75NO3	M+H 1+	594.58	188.2	142.7	164.3		292.8		84.6	113.6	125.5	283.2	4.92	4.91	4.91		4.92		4.9	4.9	4.91	5.08	0.86	0.83	0.89		0.85		0.8	0.71	0.87	0.85
299	*	ISF of Cer-NS d38:1; Cer-NS d18:1/20:0; [M+H]+ C38H75NO3	-	576.57		60.2	100.5		188.5			45.5	73.4			4.91	4.91		4.92			4.9	4.91			0.87	0.91		0.95			0.62	0.9
300	*	1-Palmitoyl-2-oleoyl-sn-glycerol [M+H]+ C37H70O5 NIST 1149340	M+H 1+	595.529	1160.4	699	1308.3	6234.9	2432.7	251.9	234.6		548.6	820.4	4.9	4.89	4.89	4.89	4.9	4.89	4.88		4.89	4.89	0.7	0.73	0.8	0.92	0.84	0.8	0.86		0.72	0.72
300	*	ISF of 1-Palmitoyl-2-oleoyl-sn-glycerol [M+H]+ C37H70O5 NIST 1149340	-	339.289				6653.9	3243.3					616.1				4.91	4.92					4.89				0.64	0.69					0.68
300	*	ISF of 1-Palmitoyl-2-oleoyl-sn-glycerol [M+H]+ C37H70O5 NIST 1149340	-	577.519	2691.7	1472	2940.4	14379.7	5220.3		507.4		1247.4	1834.4	4.9	4.89	4.91	4.89	4.9		4.9		4.89	4.89	0.8	0.85	0.92	0.96	0.94		0.93		0.87	0.8
300	*	ISF of 1-Palmitoyl-2-oleoyl-sn-glycerol [M+H]+ C37H70O5 NIST 1149340	-	313.274				3322.3						498				4.87						4.87				0.87						0.63
301		DAG 33:2; DAG 15:0-18:2; [M+NH4]+ C36H66O5---DAG 33:2; DAG 16:1-17:1; [M+NH4]+ C36H66O5	M+NH4 1+	596.524	655.2		416.4	598.3	1409.4						4.46		4.47	4.45	4.47						0.65		0.68	0.62	0.7
302		DAG 33:1; DAG 15:0-18:1; [M+NH4]+ C36H68O5---DAG 33:1; DAG 16:0-17:1; [M+NH4]+ C36H68O5	M+NH4 1+	598.54	590.1	360	492.6		1101.3	127.3	137.4				4.71	4.72	4.72		4.73	4.72	4.72				0.51	0.55	0.53		0.56	0.5	0.52
303		1-Stearoyl-2-linoleoyl-sn-glycerol [M+H-H2O]+ C39H72O5 NIST 1149402	M-H2O+H 1+	603.533	380.2				782.3			235.5		360.8	3.76				4.29			4.29		4.29	0.62				0.56			0.65		0.67
304		1-Stearoyl-2-linoleoyl-sn-glycerol [M+H-H2O]+ C39H72O5 NIST 1149403	M-H2O+H 1+	603.533						294.3	186.6	660.2								3.76	4.26	3.77								0.61	0.55	0.66
305		SM d26:3; SM d14:2/12:1; [M+H]+ C31H59N2O6P---SM d26:3; SM d14:3/12:0; [M+H]+ C31H59N2O6P	M+NH4 1+	604.437	93.1										1.86										0.56
306		DAG 34:4; DAG 16:1-18:3; [M+NH4]+ C37H64O5---DAG 34:4; DAG 16:2-18:2; [M+NH4]+ C37H64O5	M+NH4 1+	606.508	1031.2			1442				32.2			4.15			4.19				4.15			0.51			0.59				0.5
307		1-Lignoceroyl-2-hydroxy-sn-glycero-3-phosphocholine [M+H]+ C32H66NO7P NIST 1151325---1-Lignoceroyl-2-hydroxy-sn-glycero-3-phosphocholine [M+H]+ C32H66NO7P NIST 1151326---lysoPC 24:0; [M+H]+; PC(24:0/0:0) C32H66NO7P	M+H 1+	608.466						69.5		66.4	132.5	99						3.27		3.27	3.28	3.27						0.75		0.87	0.89	0.75
308		DAG 34:3; DAG 16:0-18:3; [M+NH4]+ C37H66O5---DAG 34:3; DAG 16:1-18:2; [M+NH4]+ C37H66O5	M+NH4 1+	608.525	12646.1	814	3363.9	22498	13140.9	1093.3	793.1	359.6	2571.9	2235.2	4.38	4.39	4.38	4.37	4.37	4.37	4.37	4.37	4.37	4.37	0.69	0.7	0.57	0.69	0.69	0.69	0.7	0.68	0.69	0.71
309	*	Cer-NS d39:1; Cer-NS d17:1/22:0; [M+H]+ C39H77NO3	M+H 1+	608.595	114.3	88.9	217.9	134.4	195.3		40.1	59.9		119	5.08	5.08	4.95	5.08	5.07		5.07	5.1		5.06	0.82	0.8	0.76	0.83	0.82		0.66	0.59		0.82
309	*	ISF of Cer-NS d39:1; Cer-NS d17:1/22:0; [M+H]+ C39H77NO3	-	590.587	54.5	44.9			116.6					40.9	5.08	5.08			5.07					5.08	0.73	0.7			0.92					0.83
310		DAG 34:2; DAG 16:0-18:2; [M+NH4]+ C37H68O5	M+NH4 1+	610.541	46891.9	11801	33416.6	100074	89739	4539	3843.1	1759.2	12139.9	14095.4	4.65	4.64	4.64	4.64	4.64	4.64	4.64	4.64	4.64	4.64	0.65	0.7	0.64	0.57	0.67	0.67	0.67	0.65	0.67	0.67
311		1-Palmitoyl-2-oleoyl-sn-glycerol [M+H]+ C37H70O5 NIST 1149340	M+NH4 1+	612.556	13972.3	8499.1	16387.6	86697.7	30769.6	2891.2	2572.4	1572.9	6862.6	10157	4.87	4.89	4.89	4.89	4.88	4.89	4.88	4.9	4.89	4.89	0.94	0.94	0.94	0.94	0.94	0.95	0.94	0.94	0.94	0.95
312		DAG 34:3; DAG 16:1-18:2; [M+NH4]+ C37H66O5	M+Na 1+	613.48				4100.4										4.37										0.6
312		DAG 36:6; DAG 16:1-20:5; [M+NH4]+ C39H64O5	M+H 1+	613.48	2968.8				2224.8						4.38				4.37						0.55				0.52
313		DAG 34:0; DAG 16:0-18:0; [M+NH4]+ C37H72O5	M+NH4 1+	614.571	371.6	208.7	267.9	502.4	309.1	169.2	190.6	254.7	205.5	266.9	5.17	5.16	5.16	5.17	5.15	5.18	5.17	5.17	5.16	5.17	0.54	0.55	0.59	0.56	0.62	0.59	0.57	0.56	0.55	0.55
314		DAG 36:5; DAG 16:0-20:5; [M+NH4]+ C39H66O5	M+H 1+	615.496	7687.1	3714.2	6383.1	10659.6	9008.7	1756.9	1611.2	775.7	2735.3	3749.7	4.63	4.64	4.64	4.64	4.64	4.64	4.64	4.64	4.64	4.64	0.65	0.63	0.64	0.61	0.65	0.63	0.66	0.74	0.6	0.66
315		1-Palmitoyl-2-oleoyl-sn-glycerol [M+Na]+ C37H70O5 NIST 1149371---1-Palmitoyl-2-oleoyl-sn-glycerol [M+Na]+ C37H70O5 NIST 1149377	M+Na 1+	617.511	3410.7	3176.6	3657.4	9427.5	4450.8	1415.9	1357		2511.7	3296.4	4.87	4.89	4.89	4.89	4.88	4.89	4.88		4.89	4.89	0.89	0.95	0.94	0.97	0.93	0.88	0.72		0.91	0.96
316		DG 36:4; [M+NH4]+; DG(18:1/18:3/0:0) C39H68O5---DG 36:4; [M+NH4]+; DG(18:3/18:1/0:0) C39H68O5	M+H 1+	617.523			281.2										4.36										0.6
317		Cer-NS d40:3; Cer-NS d18:2/22:1; [M+H]+ C40H75NO3	M+H 1+	618.58			63.9										4.68										0.63
318	*	Cer-NS d40:2; Cer-NS d18:1/22:1; [M+H]+ C40H77NO3---Cer-NS d40:2; Cer-NS d18:2/22:0; [M+H]+ C40H77NO3	M+H 1+	620.596	539.6		517.3	995.2		191.8	191.3		455.2	504.4	4.96		4.95	4.94		4.95	4.95		4.93	4.94	0.91		0.87	0.83		0.85	0.89		0.88	0.87
318	*	ISF of Cer-NS d40:2; Cer-NS d18:2/22:0; [M+H]+ C40H77NO3---Cer-NS d40:2; Cer-NS d18:1/22:1; [M+H]+ C40H77NO3	-	602.585				607.5		109.6	95.1			296.4				4.94		4.95	4.95			4.94				0.97		0.88	0.81			0.95
319		lysoPC 24:4; [M+H]+; PC(24:4(5Z,8Z,11Z,14Z)/0:0) C32H58NO7P	M+Na 1+	622.379					376.1										1.96										0.65
320		DAG 35:3; DAG 17:1-18:2; [M+NH4]+ C38H68O5	M+NH4 1+	622.54	658.3		194.3	775.1	825.9		83.3			103.7	4.54		4.53	4.54	4.54		4.53			4.54	0.68		0.6	0.61	0.65		0.89			0.65
321	*	Cer-NS d40:1; Cer-NS d18:1/22:0; [M+H]+ C40H79NO3	M+H 1+	622.612	1330.1	1183.9	1104.8	1779.6	2800.4	334.5	280.2	244.2	788	1105.6	5.23	5.22	5.22	5.23	5.22	5.22	5.21	5.23	5.22	5.23	0.92	0.92	0.92	0.94	0.92	0.92	0.87	0.87	0.91	0.92
321	*	ISF of Cer-NS d40:1; Cer-NS d18:1/22:0; [M+H]+ C40H79NO3	-	604.602	851.1	742.2	675.6	1147.2	1761.6	194.7	169.3	137.2	489.1	682.5	5.23	5.22	5.22	5.23	5.22	5.22	5.21	5.23	5.22	5.23	0.99	0.99	1	0.99	0.99	0.94	0.92	0.97	0.98	0.98
322		DAG 35:2; DAG 17:0-18:2; [M+NH4]+ C38H70O5---DAG 35:2; DAG 17:1-18:1; [M+NH4]+ C38H70O5	M+NH4 1+	624.556	1126.7	496.3	712.1	1256.1	1951.1					202.2	4.79	4.85	4.78	4.79	4.79					4.79	0.57	0.63	0.5	0.61	0.54					0.56
323		Cer-NDS d40:0; Cer-NDS d18:0/22:0; [M+H]+ C40H81NO3	M+H 1+	624.63					220.6										5.41										0.62
324		DAG 35:1; DAG 17:0-18:1; [M+NH4]+ C38H72O5	M+NH4 1+	626.571	404.4	244.9	290.3		595.7				117.5		4.94	5.04	5.03		5.02				5.03		0.57	0.51	0.51		0.62				0.52
325		NCGC00385199-01!2-[3,4-bis[[(2S,3R,4S,5S,6R)-3,4,5-trihydroxy-6-(hydroxymethyl)oxan-2-yl]oxy]phenyl]-5,7-dihydroxychromen-4-one C27H30O16	M+NH4 1+	628.194	219.9	374.7	376.1	211.8	235.8	96.4	126.2	142.4	243.4	235.3	2.72	2.72	2.71	2.71	2.71	2.71	2.71	2.71	2.71	2.72	0.57	0.56	0.58	0.57	0.56	0.55	0.56	0.53	0.56	0.56
326		Cer-NS d39:2; Cer-NS d18:1/21:1; [M+H]+ C39H75NO3	M+Na 1+	628.561						773										4.89										0.54
327		DAG 36:6; DAG 14:0-22:6; [M+NH4]+ C39H64O5---DAG 36:6; DAG 18:2-18:4; [M+NH4]+ C39H64O5	M+NH4 1+	630.508	261.2			266.4	194.9					88.2	4.01			4.09	4					4.18	0.59			0.63	0.62					0.62
328		DAG 36:5; DAG 16:1-20:4; [M+NH4]+ C39H66O5---DAG 36:5; DAG 18:2-18:3; [M+NH4]+ C39H66O5	M+NH4 1+	632.524	4270.6	195.7	704.7	3366.8	3680.7	525.5	357.6	117	1180.2	672.6	4.23	4.27	4.26	4.25	4.24	4.27	4.28	4.25	4.26	4.29	0.69	0.64	0.68	0.64	0.67	0.66	0.69	0.62	0.62	0.54
329		Cer-NS d41:3; Cer-NS d17:1/24:2; [M+H]+ C41H77NO3	M+H 1+	632.592									38.6										4.83										0.7
330		DAG 36:4; DAG 16:0-20:4; [M+NH4]+ C39H68O5	M+NH4 1+	634.54			6724.2	9095.1	8257.5		1095.3	306	6207.4	3096.5			4.53	4.64	4.64		4.61	4.63	4.53	4.6			0.67	0.65	0.66		0.7	0.66	0.68	0.7
331	*	Cer-NS d41:2; Cer-NS d17:1/24:1; [M+H]+ C41H79NO3	M+H 1+	634.611	203.3	181.6	216.3	205	289.8	123.9	123.7	201.4	314.7	184.3	5.1	5.1	5.1	5.1	5.09	5.09	5.11	5.08	5.1	5.1	0.63	0.73	0.78	0.82	0.69	0.73	0.72	0.65	0.84	0.77
331	*	ISF of Cer-NS d41:2; Cer-NS d17:1/24:1; [M+H]+ C41H79NO3	-	616.599		99.7	125.6		168.2				183.8			5.1	5.1		5.09				5.1			0.74	0.65		0.7				0.83
332		DAG 36:3; DAG 18:1-18:2; [M+NH4]+ C39H70O5	M+NH4 1+	636.556	56833.1	2068.4	18518.7	73671.3	69435.8	3373.3	2025	1246.1	7663.5	5135.1	4.69	4.7	4.7	4.68	4.68	4.68	4.7	4.69	4.7	4.68	0.68	0.63	0.67	0.69	0.69	0.66	0.68	0.69	0.66	0.69
333	*	Cer-NS d41:1; Cer-NS d18:1/23:0; [M+H]+ C41H81NO3	M+H 1+	636.628	435.1	398.3	407.5	441.1	734.4	275.1	217.8	239.9	636.1	407	5.37	5.37	5.37	5.37	5.36	5.36	5.36	5.38	5.37	5.36	0.85	0.84	0.88	0.86	0.86	0.86	0.83	0.88	0.87	0.86
333	*	ISF of Cer-NS d41:1; Cer-NS d18:1/23:0; [M+H]+ C41H81NO3	-	618.617	253.5	214.7	211	247.6	445.7	165.9	109.3	122.8	352.3	221	5.37	5.37	5.37	5.37	5.36	5.36	5.36	5.36	5.37	5.36	0.93	0.97	0.97	0.96	0.97	0.94	0.95	0.9	0.96	0.97
334		1-Stearoyl-2-linoleoyl-sn-glycerol [M+H-H2O]+ C39H72O5 NIST 1149402---1-Stearoyl-2-linoleoyl-sn-glycerol [M+H]+ C39H72O5 NIST 1149397	M+NH4 1+	638.572	32858.2,1671.6	5298.8			57589.8	2600.1	2118.7	1409.3	5366.6	4521.3	4.94,7.04	4.95			4.94	4.93	4.95	4.94	4.93	4.94	0.56,0.58	0.73			0.57	0.52	0.53	0.56	0.52	0.54
335		DAG 36:4; DAG 16:0-20:4; [M+NH4]+ C39H68O5	M+Na 1+	639.495						576.3										4.6										0.53
335		DAG 38:7; DAG 18:2-20:5; [M+NH4]+ C41H66O5	M+H 1+	639.496	3699.1		1880.3	2389.4	3059	815.2			1265	1045.9	4.44		4.53	4.43	4.43	4.45			4.44	4.44	0.79		0.7	0.79	0.78	0.69			0.74	0.65
336		DAG 36:1; DAG 18:0-18:1; [M+NH4]+ C39H74O5	M+NH4 1+	640.587	1767.2	1403.9	2080.6	3013.2	3242.9	307.6	311.5	321.4	536.9	598	5.21	5.2	5.2	5.21	5.19	5.2	5.19	5.21	5.2	5.19	0.57	0.6	0.6	0.56	0.61	0.61	0.63	0.6	0.58	0.56
337		CE 16:1; [M+NH4]+ C43H74O2	M+NH4 1+	640.599		111.8	236.6	226.4		189				119.6		6.55	6.56	6.55		6.55				6.56		0.7	0.72	0.87		0.71				0.63
338		DAG 36:3; DAG 18:1-18:2; [M+NH4]+ C39H70O5	M+Na 1+	641.512			3572.3			1284.5				1385.3			4.7			4.7				4.7			0.63			0.62				0.61
338		DAG 38:6; DAG 18:1-20:5; [M+NH4]+ C41H68O5---DAG 38:6; DAG 18:2-20:4; [M+NH4]+ C41H68O5---DG 38:6; [M+NH4]+; DG(16:0/22:6/0:0) C41H68O5---DG 38:6; [M+NH4]+; DG(22:6/16:0/0:0) C41H68O5	M+H 1+	641.512	7721.9			8423.9	6319.3		941.3	499.9	1307.9		4.69			4.7	4.71		4.7	4.71	4.57		0.64			0.67	0.62		0.72	0.6	0.6
339		CE 16:0; [M+NH4]+ C43H76O2	M+NH4 1+	642.615							50.3										6.74										0.67
340		DAG 38:5; DAG 18:1-20:4; [M+NH4]+ C41H70O5	M+H 1+	643.527	6970.5		6113	9108.6	7143.8	1319.5	1073.5		2089.4	1650.2	4.94		4.95	4.94	4.94	4.95	4.95		4.93	4.94	0.67		0.68	0.73	0.67	0.75	0.69		0.7	0.64
341		Cer-NS d40:1; Cer-NS d18:1/22:0; [M+H]+ C40H79NO3	M+Na 1+	644.592					51.2										4.75										0.62
342		DAG 38:4; DAG 18:0-20:4; [M+NH4]+ C41H72O5---DAG 38:4; DAG 18:1-20:3; [M+NH4]+ C41H72O5	M+H 1+	645.542		622.4	771.1	1752.8	878.3							5.2	5.21	4.79	5.19							0.87	0.74	0.53	0.64
343	*	Cer-NS d42:3; Cer-NS d18:1/24:2; [M+H]+ C42H79NO3---Cer-NS d42:3; Cer-NS d18:2/24:1; [M+H]+ C42H79NO3	M+H 1+	646.612	422.9	321.3	484.4	463.6	623.9	274.4	234.5	124.8	677.7	340.8	4.98	5	4.99	4.98	4.98	4.99	4.99	4.98	4.99	4.98	0.74	0.76	0.78	0.77	0.73	0.68	0.73	0.74	0.7	0.73
343	*	ISF of Cer-NS d42:3; Cer-NS d18:2/24:1; [M+H]+ C42H79NO3---Cer-NS d42:3; Cer-NS d18:1/24:2; [M+H]+ C42H79NO3	-	628.601	200.1	137	208.2	231.6	272.7			54.9		160.6	4.98	4.98	4.97	4.98	4.98			4.98		4.98	0.97	0.94	0.96	0.94	0.96			0.95		0.93
344		DAG 37:4; DAG 17:0-20:4; [M+NH4]+ C40H70O5---DAG 37:4; DAG 18:2-19:2; [M+NH4]+ C40H70O5	M+NH4 1+	648.557	310			300.8	425.4						4.71			4.68	4.73						0.54			0.56	0.66
345	*	Cer-NS d42:2; Cer-NS d18:1/24:1; [M+H]+ C42H81NO3---N-Tetracosenoyl-4-sphingenine [M+H]+ C42H81NO3 NIST 1197335	M+H 1+	648.628	1838.3	1655.9	1921.8	2059.4	2796.6	1042.2	891.1	530.7	2587.4	1664	5.23	5.22	5.22	5.23	5.22	5.22	5.21	5.23	5.22	5.23	0.9	0.9	0.9	0.9	0.88	0.91	0.88	0.89	0.91	0.89
345	*	ISF of Cer-NS d42:2; Cer-NS d18:1/24:1; [M+H]+ C42H81NO3---N-Tetracosenoyl-4-sphingenine [M+H]+ C42H81NO3 NIST 1197335	-	630.618	955	878.3	979.5	1100.4	1486.5	520.7	449.4	256.7	1375.7	886.1	5.23	5.22	5.22	5.23	5.22	5.22	5.21	5.23	5.22	5.23	0.99	1	0.99	1	0.99	0.98	0.98	0.99	0.99	0.99
346		DAG 37:3; DAG 19:1-18:2; [M+NH4]+ C40H72O5	M+NH4 1+	650.571	290.2		163.4	356.3	410.4	52					4.85		4.86	4.87	4.85	4.87					0.6		0.55	0.58	0.6	0.58
347	*	Cer-NS d42:1; Cer-NS d18:1/24:0; [M+H]+ C42H83NO3---N-Nervonoyl-D-erythro-sphinganine [M+H]+ C42H83NO3 NIST 1197352	M+H 1+	650.644	1011.5	1154.7	947.9	1045.9	1856.1	593.3		298.7		813.4	5.5	5.49	5.51	5.5	5.51	5.51		5.5		5.5	0.91	0.9	0.91	0.91	0.92	0.91		0.91		0.9
347	*	ISF of Cer-NS d42:1; Cer-NS d18:1/24:0; [M+H]+ C42H83NO3---N-Nervonoyl-D-erythro-sphinganine [M+H]+ C42H83NO3 NIST 1197352	-	632.633	586.7	614.5	563	599.2	1071	325		155.1		449.7	5.5	5.49	5.51	5.5	5.51	5.51		5.5		5.5	0.98	0.99	0.99	0.99	0.99	0.99		0.98		1
348		1-Stearoyl-2-docosahexaenoyl-sn-glycerol [M+H-H2O]+ C43H72O5 NIST 1149438---1-Stearoyl-2-docosahexaenoyl-sn-glycerol [M+H-H2O]+ C43H72O5 NIST 1149440---1-Stearoyl-2-docosahexaenoyl-sn-glycerol [M+H-H2O]+ C43H72O5 NIST 1149441	M-H2O+H 1+	651.534	411.9	249.1						634.4			4.19	4.18						4.2			0.61	0.51						0.72
349		DAG 37:2; DAG 18:1-19:1; [M+NH4]+ C40H74O5---DAG 37:2; DAG 19:0-18:2; [M+NH4]+ C40H74O5	M+NH4 1+	652.587	339.9	177.2	322.8	283.8							5.1	5.16	5.1	5.08							0.53	0.6	0.52	0.6
350		DAG 37:1; DAG 19:0-18:1; [M+NH4]+ C40H76O5	M+NH4 1+	654.602					125.2										5.32										0.58
351		DAG 38:7; DAG 16:1-22:6; [M+NH4]+ C41H66O5	M+NH4 1+	656.525	676.6			826.2		240.4	212.5		549	352.9	4.23			4.23		4.25	4.24		4.24	4.24	0.66			0.71		0.71	0.72		0.74	0.7
352		DAG 38:6; DAG 16:0-22:6; [M+NH4]+ C41H68O5---DAG 38:6; DAG 18:2-20:4; [M+NH4]+ C41H68O5	M+NH4 1+	658.54	5644.5	832.1	2500.3	5681.3	5011.4	807.2	786.1	219.5	2118.7	2569.9	4.48	4.54	4.53	4.54	4.54	4.54	4.53	4.54	4.53	4.54	0.71	0.73	0.72	0.72	0.72	0.72	0.72	0.76	0.71	0.73
353		DAG 38:5; DAG 18:1-20:4; [M+NH4]+ C41H70O5---DAG 38:5; DAG 18:2-20:3; [M+NH4]+ C41H70O5	M+NH4 1+	660.557	5777.9		1778.4	9879.1	7776.5	632.5	502		1811.1	1430.6	4.6		4.64	4.62	4.62	4.64	4.64		4.64	4.64	0.62		0.59	0.58	0.57	0.62	0.6		0.62	0.58
354		TAG 38:3; TAG 12:0-12:0-14:3; [M+NH4]+ C41H72O6	M+H 1+	661.537	201.3	183.1		106.4					170.3	136.5	5.33	5.33		5.31					5.33	5.33	0.65	0.83		0.55					0.68	0.71
355		DAG 38:4; DAG 18:0-20:4; [M+NH4]+ C41H72O5---DAG 38:4; DAG 18:1-20:3; [M+NH4]+ C41H72O5	M+NH4 1+	662.571	8008	2278.3	6369.4	9547.5	11109.8	973.4	741.8	427.6	2322.5	1634	4.94	4.93	4.93	4.94	4.94	4.93	4.93	4.94	4.93	4.94	0.68	0.68	0.68	0.67	0.67	0.74	0.68	0.65	0.67	0.67
356		Cer-NS d43:2; Cer-NS d18:1/25:1; [M+H]+ C43H83NO3	M+H 1+	662.639									82.5										5.37										0.77
357		DAG 38:3; DAG 20:1-18:2; [M+NH4]+ C41H74O5	M+NH4 1+	664.586	4868.8			6727	7739.8	573.2				768.2	5			5	5	4.99				5	0.6			0.53	0.6	0.53				0.57
358		CE 18:3; [M+NH4]+ C45H74O2	M+NH4 1+	664.602					386	285.6	207.5		601.3						6.43	6.43	6.43		6.42						0.81	0.72	0.83		0.78
359	*	Cer-NS d43:1; Cer-NS d18:1/25:0; [M+H]+ C43H85NO3	M+H 1+	664.654		109.2		93.2		98	101.9		132.7	153.5		5.6		5.62		5.63	5.61		5.63	5.61		0.62		0.6		0.56	0.61		0.72	0.58
359	*	ISF of Cer-NS d43:1; Cer-NS d18:1/25:0; [M+H]+ C43H85NO3	-	646.649	36.1			26.3							5.62			5.62							0.67			0.74
360		DAG 38:2; DAG 18:1-20:1; [M+NH4]+ C41H76O5	M+NH4 1+	666.603	2420	1188.3	2544	3866.8	4872.1	263.6	186.2		535.8	436.3	5.23	5.25	5.22	5.23	5.24	5.24	5.24		5.22	5.23	0.62	0.55	0.66	0.63	0.66	0.56	0.54		0.62	0.55
361		CE 18:2; [M+NH4]+ C45H76O2	M+NH4 1+	666.618	2014	1175.5	2608.7	1878.2	2982.1	1702.7	1542.6	533.7	4571.6	1582.2	6.59	6.59	6.58	6.57	6.59	6.57	6.58	6.58	6.59	6.58	0.89	0.9	0.88	0.88	0.87	0.87	0.88	0.83	0.87	0.89
362		DAG 38:1; DAG 20:0-18:1; [M+NH4]+ C41H78O5	M+NH4 1+	668.618		329.6	286.6	475.9	583.9	53				145.6		5.47	5.49	5.48	5.49	5.48				5.48		0.58	0.57	0.58	0.58	0.57				0.54
363		CE 18:1; [M+NH4]+ C45H78O2	M+NH4 1+	668.634	992.2	530.8	1434.5	1821.1	1049.1	948.6	781.1	136.2	2161.9	876.5	6.75	6.75	6.74	6.73	6.73	6.74	6.74	6.74	6.75	6.74	0.87	0.78	0.88	0.88	0.88	0.88	0.84	0.78	0.87	0.88
364		DAG 40:6; DAG 18:2-22:4; [M+NH4]+ C43H72O5---DAG 40:6; DAG 20:2-20:4; [M+NH4]+ C43H72O5	M+H 1+	669.542	1788			1874.7							5			5.02							0.69			0.58
365		DAG 38:2; DAG 18:1-20:1; [M+NH4]+ C41H76O5	M+Na 1+	671.558				1025.9										5.23										0.57
365		DAG 40:5; DAG 18:1-22:4; [M+NH4]+ C43H74O5	M+H 1+	671.559					1200										5.24										0.51
366		Azelaoyl PAF [M+H]+ C33H66NO9P NIST 1206378---Azelaoyl PAF [M+H]+ C33H66NO9P NIST 1206379	M+Na 1+	674.441			507.5	490	613.8			727.9		365.1			2.43	2.42	2.42			2.41		2.42			0.84	0.94	0.91			0.91		0.91
367		13-Docosenamide, (Z)- [M+H]+ C22H43NO NIST 1152867	2M+H 1+	675.676	40.4,13033.4	9003.1	4798.4	8109	11009.9	12927	10542.3	4735.7	4391	5094.9,62.0	3.14,3.05	3.06	3.05	3.05	3.05	3.06	3.06	3.05	3.05	3.06,3.13	0.90,0.92	0.92	0.92	0.92	0.92	0.92	0.92	0.91	0.92	0.92,0.93
368		PE 32:1e; PE 16:0e/16:1; [M+H]+ C37H74NO7P---PE 32:1e; PE 16:1e/16:0; [M+H]+ C37H74NO7P	M+H 1+	676.526								104										4.33										0.74
369		DAG 39:4; DAG 19:0-20:4; [M+NH4]+ C42H74O5	M+NH4 1+	676.588	175.8	55.3	149.2						65.4		5.04	5.1	5.05						5.11		0.62	0.66	0.75						0.72
370		Cer-NS d44:1; Cer-NS d18:1/26:0; [M+H]+ C44H87NO3	M+H 1+	678.674						54.8										5.75										0.56
371		DAG 40:8; DAG 18:2-22:6; [M+NH4]+ C43H68O5	M+NH4 1+	682.54	2935.9		249.9	1332.8	2321.7	277.1			554	283.7	4.31		4.32	4.31	4.31	4.31			4.3	4.31	0.71		0.71	0.72	0.71	0.71			0.71	0.73
372		DAG 39:1; DAG 21:0-18:1; [M+NH4]+ C42H80O5	M+NH4 1+	682.633					51.9										5.6										0.54
373		DAG 40:7; DAG 18:1-22:6; [M+NH4]+ C43H70O5---DAG 40:7; DAG 18:2-22:5; [M+NH4]+ C43H70O5	M+NH4 1+	684.556	1962.3		421.7	2163.7	2071.6	375.6	248.2		932.2	488.3	4.56		4.57	4.58	4.58	4.56	4.57		4.57	4.58	0.72		0.69	0.7	0.71	0.67	0.59		0.72	0.68
374		TAG 38:0; TAG 12:0-12:0-14:0; [M+NH4]+ C41H78O6	M+NH4 1+	684.613	639.1	465.1	442.4	443	450.6	445.7	502.3	605.7	570	527.6	5.6	5.6	5.59	5.58	5.6	5.59	5.61	5.61	5.59	5.61	0.76	0.9	0.89	0.84	0.85	0.89	0.89	0.73	0.91	0.89
375		1-Stearoyl-2-docosahexaenoyl-sn-glycerol [M+H]+ C43H72O5 NIST 1149431---DAG 40:6; DAG 18:0-22:6; [M+NH4]+ C43H72O5---DAG 40:6; DAG 18:1-22:5; [M+NH4]+ C43H72O5---DG 40:6; [M+NH4]+; DG(18:0/22:6/0:0) C43H72O5---DG 40:6; [M+NH4]+; DG(22:6/18:0/0:0) C43H72O5	M+NH4 1+	686.571	2789	397.8	666.2	3749.2	3458.5			203.2	1016.5	434.6	4.73	4.87	4.86	4.73	4.75			4.85	4.72	4.87	0.64	0.7	0.79	0.59	0.61			0.84	0.57	0.76
376		PE 32:2; [M+H]+; GPEtn(16:1(7Z)/16:1(7Z)) C37H70NO8P---PE 32:2; [M+H]+; GPEtn(16:1(7Z)/16:1(9Z)) C37H70NO8P---PE 32:2; [M+H]+; GPEtn(16:1(9Z)/16:1(7Z)) C37H70NO8P---PE 32:2; [M+H]+; GPEtn(16:1(9Z)/16:1(9Z)) C37H70NO8P	M+H 1+	688.492									197.3										3.59										0.95
377		DAG 40:5; DAG 18:1-22:4; [M+NH4]+ C43H74O5---DG 40:5; [M+NH4]+; DG(18:1/22:4/0:0) C43H74O5---DG 40:5; [M+NH4]+; DG(22:4/18:1/0:0) C43H74O5	M+NH4 1+	688.586				1650.6	1194.5		109.8							4.89	4.9		4.9							0.63	0.54		0.52
378		DAG 40:5; DAG 18:0-22:5; [M+NH4]+ C43H74O5	M+NH4 1+	688.598			98.5										5.05										0.51
379		SM d33:1; SM d14:0/19:1; [M+H]+ C38H77N2O6P---SM d33:1; SM d14:1/19:0; [M+H]+ C38H77N2O6P---SM d33:1; SM d15:0/18:1; [M+H]+ C38H77N2O6P---SM d33:1; SM d15:1/18:0; [M+H]+ C38H77N2O6P---SM d33:1; SM d16:1/17:0; [M+H]+ C38H77N2O6P---SM d33:1; SM d17:0/16:1; [M+H]+ C38H77N2O6P---SM d33:1; SM d17:1/16:0; [M+H]+ C38H77N2O6P---SM d33:1; SM d18:0/15:1; [M+H]+ C38H77N2O6P---SM d33:1; SM d18:1/15:0; [M+H]+…	M+H 1+	689.558	264.9		457.2		427.4		153.9	151.3	746.1	242.6	3.47		3.48		3.48		3.48	3.48	3.49	3.48	0.97		0.96		0.97		0.95	0.97	0.97	0.94
380		TAG 38:0; TAG 12:0-12:0-14:0; [M+Na]+ C41H78O6	M+Na 1+	689.569		115								108.2		5.6								5.59		0.75								0.76
380		TAG 40:3; TAG 12:0-12:0-16:3; [M+NH4]+ C43H76O6---TAG 40:3; TAG 12:0-14:0-14:3; [M+NH4]+ C43H76O6	M+H 1+	689.57	154.9		101.6					99.9	147.4		5.6		5.59					5.61	5.59		0.63		0.63					0.54	0.74
381		PE 32:1; PE 16:0-16:1; [M+H]+ C37H72NO8P---PE 32:1; [M+H]+; GPEtn(16:0/16:1(7Z)) C37H72NO8P---PE 32:1; [M+H]+; GPEtn(16:0/16:1(9Z)) C37H72NO8P---PE 32:1; [M+H]+; GPEtn(16:1(7Z)/16:0) C37H72NO8P---PE 32:1; [M+H]+; GPEtn(16:1(9Z)/16:0) C37H72NO8P	M+H 1+	690.506	490.8	692.6	479.5	629.2	695.6	460	523.2		843.3	537.4	3.85	3.86	3.85	3.86	3.86	3.86	3.85		3.86	3.86	0.97	0.98	0.96	0.96	0.96	0.97	0.97		0.97	0.97
382		DAG 40:4; DAG 18:0-22:4; [M+NH4]+ C43H76O5	M+NH4 1+	690.602		384.1										5.06										0.65
383		CE 20:4; [M+NH4]+ C47H76O2	M+NH4 1+	690.618	464.3		431.5	429	722.9	492.5			1043.3	426.6	6.49		6.48	6.49	6.49	6.49			6.48	6.48	0.88		0.81	0.83	0.88	0.89			0.87	0.89
384		PE 32:0; PE 16:0-16:0; [M+H]+ C37H74NO8P	M+H 1+	692.521				149.4	140.3	96.3	95.3			134.9				4.13	4.12	4.13	4.14			4.12				0.99	0.96	0.9	0.92			0.93
385		DAG 40:3; DAG 22:1-18:2; [M+NH4]+ C43H78O5	M+NH4 1+	692.618	585.3	229.4	279.6	537.7	986.5				131.5		5.29	5.29	5.28	5.29	5.28				5.28		0.62	0.6	0.57	0.61	0.62				0.52
386		DAG 40:2; DAG 18:1-22:1; [M+NH4]+ C43H80O5	M+NH4 1+	694.634	477.8	390.6	399.9	547.5	921.5					152.6	5.5	5.51	5.49	5.5	5.49					5.5	0.62	0.58	0.56	0.62	0.58					0.56
387		CE 22:6; [M+NH4]+ C49H76O2	M 1+	696.592					59.3										5.41										0.66
388		DAG 40:1; DAG 22:0-18:1; [M+NH4]+ C43H82O5	M+NH4 1+	696.65		117.6	89.7	103.6	159.7					64.8		5.74	5.74	5.73	5.74					5.75		0.52	0.5	0.52	0.57					0.5
389		CE 20:1; [M+NH4]+ C47H82O2	M+NH4 1+	696.657			76.4										6.89										0.66
390		CE 22:5; [M+NH4]+ C49H78O2	M 1+	698.608					155.2										5.53										0.72
391		PE 34:3e; PE 16:0e/18:3; [M+H]+ C39H74NO7P---PE 34:3e; PE 16:1e/18:2; [M+H]+ C39H74NO7P---PE 34:3e; PE 16:2e/18:1; [M+H]+ C39H74NO7P---plasmenyl-PE 34:2; [M+H]+; PE(P-16:0/18:2(2E,4E)) C39H74NO7P---plasmenyl-PE 34:2; [M+H]+; PE(P-16:0/18:2(6Z,9Z)) C39H74NO7P---plasmenyl-PE 34:2; [M+H]+; PE(P-16:0/18:2(9E,10E)) C39H74NO7P---plasmenyl-PE 34:2; [M+H]+; PE(P-16:0/18:2(9E,12E)) C39H74NO7P---plasmenyl-…	M+H 1+	700.527	267.7	160.4	276.4	153.7	241.1	264.6	188.6	581	636.4	175.3	4.13	4.12	4.12	4.13	4.12	4.13	4.12	4.12	4.12	4.12	0.79	0.8	0.71	0.7	0.73	0.74	0.8	0.74	0.78	0.74
392		HexCer-NS d34:1; HexCer-NS d18:1/16:0; [M+H]+ C40H77NO8	M+H 1+	700.571	141.6	147.8		378.1	222.7	249.1			383.8	249.3	3.85	3.84		3.84	3.84	3.84			3.84	3.84	0.74	0.77		0.75	0.72	0.72			0.77	0.76
393		SM d34:2; SM d14:0/20:2; [M+H]+ C39H77N2O6P---SM d34:2; SM d14:1/20:1; [M+H]+ C39H77N2O6P---SM d34:2; SM d14:2/20:0; [M+H]+ C39H77N2O6P---SM d34:2; SM d15:1/19:1; [M+H]+ C39H77N2O6P---SM d34:2; SM d15:2/19:0; [M+H]+ C39H77N2O6P---SM d34:2; SM d16:0/18:2; [M+H]+ C39H77N2O6P---SM d34:2; SM d16:1/18:1; [M+H]+ C39H77N2O6P---SM d34:2; SM d16:2/18:0; [M+H]+ C39H77N2O6P---SM d34:2; SM d17:2/17:0; [M+H]+…	M+H 1+	701.558	222		298.5								3.39		3.39								0.97		0.98
394		PE 34:2e; PE 16:0e/18:2; [M+H]+ C39H76NO7P---PE 34:2e; PE 16:1e/18:1; [M+H]+ C39H76NO7P---PE 34:2e; PE 16:2e/18:0; [M+H]+ C39H76NO7P---plasmenyl-PE 34:1; [M+H]+; PE(P-16:0/18:1(11E)) C39H76NO7P---plasmenyl-PE 34:1; [M+H]+; PE(P-16:0/18:1(11Z)) C39H76NO7P---plasmenyl-PE 34:1; [M+H]+; PE(P-16:0/18:1(13Z)) C39H76NO7P---plasmenyl-PE 34:1; [M+H]+; PE(P-16:0/18:1(17Z)) C39H76NO7P---plasmenyl-PE 34:1; […	M+H 1+	702.543	606.9	121.8	258.1	323.2				998.5	441.9	188.4	4.38	4.37	4.36	4.37				4.37	4.37	4.37	0.71	0.68	0.69	0.63				0.61	0.71	0.67
395		SM d34:1; SM d14:0/20:1; [M+H]+ C39H79N2O6P---SM d34:1; SM d14:1/20:0; [M+H]+ C39H79N2O6P---SM d34:1; SM d15:0/19:1; [M+H]+ C39H79N2O6P---SM d34:1; SM d15:1/19:0; [M+H]+ C39H79N2O6P---SM d34:1; SM d16:0/18:1; [M+H]+ C39H79N2O6P---SM d34:1; SM d16:1/18:0; [M+H]+ C39H79N2O6P---SM d34:1; SM d17:1/17:0; [M+H]+ C39H79N2O6P---SM d34:1; SM d18:0/16:1; [M+H]+ C39H79N2O6P---SM d34:1; SM d18:1/16:0; [M+H]+…	M+H 1+	703.576	20069.6	10132.6	19755	18957.1	23739.4	11425.7	8314.4	14685	34420.9	16314.5	3.66	3.65	3.67	3.66	3.65	3.66	3.67	3.67	3.65	3.65	0.97	0.97	0.97	0.97	0.97	0.97	0.97	0.97	0.97	0.97
396		PC 30:1; PC 14:0-16:1; [M+H]+ C38H74NO8P	M+H 1+	704.522									400.8										3.4										0.9
397		PE 34:1e; PE 18:0e/16:1; [M+H]+ C39H78NO7P---PE 34:1e; PE 18:1e/16:0; [M+H]+ C39H78NO7P	M+H 1+	704.558								148.1										4.66										0.73
398		SM 34:0; [M]+; SM(d14:0/20:0) C39H82N2O6P---SM 34:0; [M]+; SM(d16:0/18:0) C39H82N2O6P---SM 34:0; [M]+; SM(d18:0/16:0) C39H82N2O6P	M 1+	705.585		2095.4						2920.8				3.72						3.71				0.92						0.92
398		SM d34:0; SM d14:0/20:0; [M+H]+ C39H81N2O6P---SM d34:0; SM d15:0/19:0; [M+H]+ C39H81N2O6P---SM d34:0; SM d16:0/18:0; [M+H]+ C39H81N2O6P---SM d34:0; SM d17:0/17:0; [M+H]+ C39H81N2O6P---SM d34:0; SM d18:0/16:0; [M+H]+ C39H81N2O6P---SM d34:0; SM d19:0/15:0; [M+H]+ C39H81N2O6P---SM d34:0; SM d20:0/14:0; [M+H]+ C39H81N2O6P---SM d34:0; SM d21:0/13:0; [M+H]+ C39H81N2O6P---SM d34:0; SM d22:0/12:0; [M+H]+…	M+H 1+	705.585	1453.9		2189.5			491.7				2593.7	3.7		3.69			3.78				3.69	0.97		0.96			0.98				0.97
399		1,2-Dipentadecanoyl-sn-glycero-3-phosphocholine [M+H]+ C38H76NO8P NIST 1150132---1-Myristoyl-2-palmitoyl-sn-glycero-3-phosphocholine [M+H]+ C38H76NO8P NIST 1150217---1-Palmitoyl-2-myristoyl-sn-glycero-3-phosphocholine [M+H]+ C38H76NO8P NIST 1150264	M+H 1+	706.539	1639.4	1482	2245.1	2352	2421.9	1485.3	1154.6	4069.9	3797.7	1918.3	3.68	3.67	3.67	3.68	3.67	3.68	3.69	3.69	3.68	3.67	0.98	0.99	0.99	0.98	0.99	0.98	0.98	0.98	0.99	0.98
400		TAG 40:1; TAG 12:0-12:0-16:1; [M+NH4]+ C43H80O6---TAG 40:1; TAG 12:0-14:0-14:1; [M+NH4]+ C43H80O6	M+NH4 1+	710.63		134.4				80.5				151.3		5.64				5.65				5.67		0.54				0.56				0.52
401		TAG 40:0; TAG 12:0-12:0-16:0; [M+NH4]+ C43H82O6---TAG 40:0; TAG 12:0-14:0-14:0; [M+NH4]+ C43H82O6	M+NH4 1+	712.644	485.3	357.8	369	371.3	418.1	315.4	329.8	395.3	399.7	376.3	5.85	5.85	5.84	5.85	5.85	5.83	5.83	5.86	5.84	5.83	0.73	0.77	0.77	0.78	0.77	0.83	0.82	0.78	0.8	0.81
402		PE 34:3; PE 16:1-18:2; [M+H]+ C39H72NO8P---PE 34:3; [M+H]+; GPEtn(16:0/18:3(6Z,9Z,12Z)) C39H72NO8P---PE 34:3; [M+H]+; GPEtn(16:0/18:3(9Z,12Z,15Z)) C39H72NO8P---PE 34:3; [M+H]+; GPEtn(16:1(7Z)/18:2(2E,4E)) C39H72NO8P---PE 34:3; [M+H]+; GPEtn(16:1(7Z)/18:2(6Z,9Z)) C39H72NO8P---PE 34:3; [M+H]+; GPEtn(16:1(7Z)/18:2(9E,10E)) C39H72NO8P---PE 34:3; [M+H]+; GPEtn(16:1(7Z)/18:2(9E,12E)) C39H72NO8P---PE 34…	M+H 1+	714.507	1924.8	1963.2	1663.9	1199.1	3015.6	1840.6	1678.4		4049.7	1563.1	3.7	3.69	3.69	3.7	3.7	3.7	3.69		3.68	3.69	0.97	0.97	0.97	0.97	0.97	0.97	0.98		0.97	0.97
403		CE 22:6; [M+NH4]+ C49H76O2	M+NH4 1+	714.618	873.2	314.4	573.2	1073.9	1102	349.1	317.1	92.9	788.7	720.4	6.43	6.42	6.42	6.41	6.41	6.41	6.41	6.41	6.42	6.42	0.86	0.73	0.87	0.87	0.88	0.8	0.81	0.72	0.87	0.86
404	*	2-Linoleoyl-1-palmitoyl-sn-glycero-3-phosphoethanolamine [M+H]+ C39H74NO8P NIST 1150534---2-Linoleoyl-1-palmitoyl-sn-glycero-3-phosphoethanolamine [M+H]+ C39H74NO8P NIST 1150536	M+H 1+	716.523	18923.5	20329.3	13841.7	12536.3	35420.9	10880.7	10184.4	2655	25373	14249.2	3.95	3.94	3.93	3.94	3.94	3.94	3.93	3.93	3.94	3.94	0.98	0.98	0.98	0.98	0.98	0.98	0.98	0.97	0.98	0.98
404	*	ISF of 2-Linoleoyl-1-palmitoyl-sn-glycero-3-phosphoethanolamine [M+H]+ C39H74NO8P NIST 1150536---2-Linoleoyl-1-palmitoyl-sn-glycero-3-phosphoethanolamine [M+H]+ C39H74NO8P NIST 1150534	-	575.502	514.1	628.3	417.8	332.6	1014.3	297.2	300.9	99.7	624.3	394	3.95	3.94	3.93	3.94	3.94	3.94	3.93	3.93	3.94	3.94	0.98	0.97	0.97	0.97	0.98	0.97	0.97	0.96	0.98	0.97
405		DAG 42:5; DAG 18:1-24:4; [M+NH4]+ C45H78O5---DG 42:5; [M+NH4]+; DG(20:0/22:5/0:0) C45H78O5---DG 42:5; [M+NH4]+; DG(22:5/20:0/0:0) C45H78O5	M+NH4 1+	716.619	168.8								70.9		5.12								5.18		0.58								0.58
406		SM d35:1; SM d14:0/21:1; [M+H]+ C40H81N2O6P---SM d35:1; SM d14:1/21:0; [M+H]+ C40H81N2O6P---SM d35:1; SM d15:0/20:1; [M+H]+ C40H81N2O6P---SM d35:1; SM d15:1/20:0; [M+H]+ C40H81N2O6P---SM d35:1; SM d16:0/19:1; [M+H]+ C40H81N2O6P---SM d35:1; SM d16:1/19:0; [M+H]+ C40H81N2O6P---SM d35:1; SM d17:0/18:1; [M+H]+ C40H81N2O6P---SM d35:1; SM d17:1/18:0; [M+H]+ C40H81N2O6P---SM d35:1; SM d18:1/17:0; [M+H]+…	M+H 1+	717.59						211.3		548.4	372.5							3.84		3.83	3.82							0.93		0.96	0.9
407		TAG 42:3; TAG 12:0-12:3-18:0; [M+NH4]+ C45H80O6---TAG 42:3; TAG 12:0-14:0-16:3; [M+NH4]+ C45H80O6---TAG 42:3; TAG 12:3-14:0-16:0; [M+NH4]+ C45H80O6---TAG 42:3; TAG 14:0-14:0-14:3; [M+NH4]+ C45H80O6	M+H 1+	717.601		93.5	75.1				92.9	84.2	92.6			5.85	5.84				5.85	5.86	5.84			0.5	0.59				0.69	0.6	0.55
407		TAG 40:0; TAG 12:0-14:0-14:0; [M+NH4]+ C43H82O6---TAG 40:0; TAG 12:0-14:0-14:0; [M+Na]+ C43H82O6---TG 40:0; [M+Na]+; TG(12:0/12:0/16:0) C43H82O6	M+Na 1+	717.599	92.6				82.9	88.1				85.8	5.83				5.85	5.85				5.86	0.81				0.82	0.9				0.66
408		PEtOH 34:2; PEtOH 16:0-18:2; [M+NH4]+ C39H73O8P	M+NH4 1+	718.538		998.5										3.74										0.9
409	*	1-Hexadecanoyl-2-(9Z-octadecenoyl)-sn-glycero-3-phosphoethanolamine [M+H]+ C39H76NO8P NIST 1150566---PE 34:1; [M+H]+; GPEtn(16:0/18:1(11E)) C39H76NO8P---PE 34:1; [M+H]+; GPEtn(16:0/18:1(11Z)) C39H76NO8P---PE 34:1; [M+H]+; GPEtn(16:0/18:1(13Z)) C39H76NO8P---PE 34:1; [M+H]+; GPEtn(16:0/18:1(17Z)) C39H76NO8P---PE 34:1; [M+H]+; GPEtn(16:0/18:1(4E)) C39H76NO8P---PE 34:1; [M+H]+; GPEtn(16:0/18:1(6Z)) C…	M+H 1+	718.538	5182.5	4930.8	3958.9	5359.7	6267.2	4964.2	4817.1		11999.9	4332.4	4.19	4.18	4.18	4.19	4.18	4.19	4.18		4.18	4.18	0.96	0.96	0.96	0.97	0.97	0.97	0.97		0.97	0.96
409	*	ISF of 1-Hexadecanoyl-2-(9Z-octadecenoyl)-sn-glycero-3-phosphoethanolamine [M+H]+ C39H76NO8P NIST 1150566---PE 34:1; [M+H]+; GPEtn(16:0/18:1(11E)) C39H76NO8P	-	577.518						152.7			360.4							4.19			4.18							0.94			0.96
410		PC 31:0; PC 15:0-16:0; [M+H]+ C39H78NO8P	M+H 1+	720.554								2116.8										3.83										0.87
411		PC 32:0e; PC 14:0e/18:0; [M+H]+ C40H82NO7P---PC 32:0e; PC 16:0e/16:0; [M+H]+ C40H82NO7P---PC 32:0e; PC 18:0e/14:0; [M+H]+ C40H82NO7P	M+H 1+	720.59	1963.3		2991.4	2804.1	2844.1						4.23		4.24	4.25	4.24						0.9		0.95	0.95	0.94
412		DAG 42:3; DAG 24:1-18:2; [M+NH4]+ C45H82O5	M+NH4 1+	720.647					187.8										5.55										0.6
413		DAG 42:2; DAG 18:1-24:1; [M+NH4]+ C45H84O5	M+NH4 1+	722.662		174.6			259.1							5.76			5.76							0.67			0.59
414		PE 36:5e; PE 16:0e/20:5; [M+H]+ C41H74NO7P---PE 36:5e; PE 16:1e/20:4; [M+H]+ C41H74NO7P---PE 36:5e; PE 16:2e/20:3; [M+H]+ C41H74NO7P---plasmenyl-PE 36:4; [M+H]+; PE(P-16:0/20:4(5E,8E,11E,14E)) C41H74NO7P---plasmenyl-PE 36:4; [M+H]+; PE(P-16:0/20:4(5Z,8Z,11Z,14Z)) C41H74NO7P---plasmenyl-PE 36:4; [M+H]+; PE(P-16:0/20:4(7E,10E,13E,16E)) C41H74NO7P	M+H 1+	724.527	5186.8	2685.6	3379.1	3068.6	3496.8	64.1,2845.0	1939.4	1434.1	7001.2	2999.9	4.09	4.08	4.1	4.09	4.08	4.19,4.09	4.1	4.1	4.1	4.08	0.82	0.81	0.79	0.81	0.8	0.75,0.82	0.83	0.83	0.82	0.79
415		DAG 42:1; DAG 24:0-18:1; [M+NH4]+ C45H86O5	M+NH4 1+	724.682		55.2			67							5.97			5.97							0.57			0.57
416		SM 34:1; [M+Na]+; SM(d14:1(4E)/20:0) C39H80N2O6P---SM 34:1; [M+Na]+; SM(d16:0/18:1(9Z)) C39H80N2O6P---SM 34:1; [M+Na]+; SM(d16:1(4E)/18:0) C39H80N2O6P---SM 34:1; [M+Na]+; SM(d18:1(4E)/16:0) C39H80N2O6P	M+Na 1+	725.557	1248.3	712	1165.6	1172	1199.7	846	705.2	1137.2	1444.9	1104.3	3.64	3.65	3.65	3.66	3.65	3.66	3.65	3.64	3.65	3.65	0.81	0.83	0.8	0.82	0.82	0.84	0.82	0.82	0.83	0.82
417		PE 36:4e; PE 16:0e/20:4; [M+H]+ C41H76NO7P---PE 36:4e; PE 16:1e/20:3; [M+H]+ C41H76NO7P---PE 36:4e; PE 16:2e/20:2; [M+H]+ C41H76NO7P	M+H 1+	726.538	1315.6								1658.4		4.13								4.14		0.72								0.52
418		TAG 41:0; TAG 12:0-14:0-15:0; [M+NH4]+ C44H84O6---TAG 41:0; TAG 13:0-14:0-14:0; [M+NH4]+ C44H84O6	M+NH4 1+	726.66	243.5							187.7		157	5.91							5.9		5.94	0.8							0.68		0.69
419		1-Myristoyl-2-palmitoyl-sn-glycero-3-phosphocholine [M+H]+ C38H76NO8P NIST 1150221	M+Na 1+	728.521								252.2	500.6									3.41	3.36									0.73	0.94
420		1-Palmitoyl-2-myristoyl-sn-glycero-3-phosphocholine [M+Na]+ C38H76NO8P NIST 1150290---1-Palmitoyl-2-myristoyl-sn-glycero-3-phosphocholine [M+Na]+ C38H76NO8P NIST 1150297---PC 30:0; [M+Na]+; GPCho(15:0/15:0) C38H76NO8P	M+Na 1+	728.521		378.3	221.7			204.1		193.7	391.7			3.72	3.7			3.69		3.67	3.69			0.66	0.58			0.66		0.76	0.71
420		PE 35:3; [M+H]+; GPEtn(17:1(9Z)/18:2(2E,4E)) C40H74NO8P---PE 35:3; [M+H]+; GPEtn(17:1(9Z)/18:2(6Z,9Z)) C40H74NO8P---PE 35:3; [M+H]+; GPEtn(17:1(9Z)/18:2(9E,10E)) C40H74NO8P---PE 35:3; [M+H]+; GPEtn(17:1(9Z)/18:2(9E,12E)) C40H74NO8P---PE 35:3; [M+H]+; GPEtn(17:1(9Z)/18:2(9Z,11Z)) C40H74NO8P---PE 35:3; [M+H]+; GPEtn(17:1(9Z)/18:2(9Z,12Z)) C40H74NO8P---PE 35:3; [M+H]+; GPEtn(18:2(2E,4E)/17:1(9Z)) C4…	M+H 1+	728.521						120.6										3.82										0.98
421		1-Stearoyl-2-oleoyl-sn-glycero-3-phosphoethanolamine [M+H-H2O]+ C41H80NO8P NIST 1035404	M-H2O+H 1+	728.558								1190.9										4.44										0.71
421		PE 36:3e; PE 18:0e/18:3; [M+H]+ C41H78NO7P---PE 36:3e; PE 18:1e/18:2; [M+H]+ C41H78NO7P---PE 36:3e; PE 18:2e/18:1; [M+H]+ C41H78NO7P---PE 36:3e; PE 18:3e/18:0; [M+H]+ C41H78NO7P	M+H 1+	728.558							155.9		576								4.45		4.45								0.66		0.65
422		N-Octadecanoyl-1-.beta.-galactosyl-sphing-4-enine [M+H]+ C42H81NO8 NIST 1035518	M+H 1+	728.6								157										4.18										0.86
423		N-Oleoyl-D-erythro-sphingosylphosphorylcholine [M+H]+ C41H81N2O6P NIST 1151791	M+H 1+	729.59			293.1					1119.5					3.73					3.73					0.97					0.98
424		PE 35:2; [M+H]+; GPEtn(17:0/18:2(2E,4E)) C40H76NO8P---PE 35:2; [M+H]+; GPEtn(17:0/18:2(6Z,9Z)) C40H76NO8P---PE 35:2; [M+H]+; GPEtn(17:0/18:2(9E,10E)) C40H76NO8P---PE 35:2; [M+H]+; GPEtn(17:0/18:2(9E,12E)) C40H76NO8P---PE 35:2; [M+H]+; GPEtn(17:0/18:2(9Z,11Z)) C40H76NO8P---PE 35:2; [M+H]+; GPEtn(17:0/18:2(9Z,12Z)) C40H76NO8P---PE 35:2; [M+H]+; GPEtn(17:1(9Z)/18:1(11E)) C40H76NO8P---PE 35:2; [M+H]+…	M+H 1+	730.538					1032.7	459.4			1065.8	423					4.1	4.11			4.1	4.1					0.97	0.97			0.98	0.97
425		1,2-Dipalmitoleoyl-sn-glycero-3-phosphocholine [M+H]+ C40H76NO8P NIST 1150147---1,2-Dipalmitoleoyl-sn-glycero-3-phosphocholine [M+H]+ C40H76NO8P NIST 1150148	M+H 1+	730.538	2071.8	1525	3690.9	2679.5	3105.7	3003	2408.4	2033.2	9412.2	3570	3.49	3.48	3.48	3.49	3.48	3.49	3.48	3.5	3.49	3.48	0.95	0.95	0.95	0.95	0.95	0.95	0.95	0.96	0.96	0.95
426		PE 36:2e; PE 18:0e/18:2; [M+H]+ C41H80NO7P---PE 36:2e; PE 18:1e/18:1; [M+H]+ C41H80NO7P---PE 36:2e; PE 18:2e/18:0; [M+H]+ C41H80NO7P---plasmenyl-PE 36:1; [M+H]+; PE(P-18:0/18:1(11E)) C41H80NO7P---plasmenyl-PE 36:1; [M+H]+; PE(P-18:0/18:1(11Z)) C41H80NO7P---plasmenyl-PE 36:1; [M+H]+; PE(P-18:0/18:1(13Z)) C41H80NO7P---plasmenyl-PE 36:1; [M+H]+; PE(P-18:0/18:1(17Z)) C41H80NO7P---plasmenyl-PE 36:1; […	M+H 1+	730.575	244.7			328.9				622.8			4.69			4.66				4.71			0.76			0.77				0.79
427		TAG 42:5; TAG 12:1-15:2-15:2; [M+NH4]+ C45H76O6	M+NH4 1+	730.594			241.2										5.07										0.6
428		N-Stearoyl-4-sphingenyl-1-O-phosphorylcholine [2M+H]+ C41H83N2O6P NIST 1035548---N-Stearoyl-4-sphingenyl-1-O-phosphorylcholine [M+H]+ C41H83N2O6P NIST 1035553---N-Stearoyl-4-sphingenyl-1-O-phosphorylcholine [M+H]+ C41H83N2O6P NIST 1035554---N-Stearoyl-4-sphingenyl-1-O-phosphorylcholine [M+H]+ C41H83N2O6P NIST 1035555	M+H 1+	731.606	8044.1	1914	3538	3202.4	4291.5	1591.1	1331.6	13230.5	5385.5	2637.1	4.01	4	3.99	4	4	4	3.99	4	4	4	0.99	0.98	0.99	0.99	0.99	0.99	0.99	0.99	0.99	0.99
429		PE 35:1; [M+H]+; GPEtn(17:0/18:1(11E)) C40H78NO8P---PE 35:1; [M+H]+; GPEtn(17:0/18:1(11Z)) C40H78NO8P---PE 35:1; [M+H]+; GPEtn(17:0/18:1(13Z)) C40H78NO8P---PE 35:1; [M+H]+; GPEtn(17:0/18:1(17Z)) C40H78NO8P---PE 35:1; [M+H]+; GPEtn(17:0/18:1(4E)) C40H78NO8P---PE 35:1; [M+H]+; GPEtn(17:0/18:1(6Z)) C40H78NO8P---PE 35:1; [M+H]+; GPEtn(17:0/18:1(7Z)) C40H78NO8P---PE 35:1; [M+H]+; GPEtn(17:0/18:1(9E)) …	M+H 1+	732.553									469.5										4.34										0.96
430		1-(9Z-Octadecenoyl)-2-tetradecanoyl-sn-glycero-3-phosphocholine [M+H]+ C40H78NO8P NIST 1150399	M+H 1+	732.554	22518.6	24827.9	32984.5	41611.4	30950.3	22224.3	21034.9	21925.4	44151.9	31257.3	3.74	3.74	3.73	3.74	3.74	3.74	3.73	3.75	3.74	3.74	0.96	0.96	0.96	0.96	0.96	0.96	0.96	0.96	0.96	0.96
431		PE 36:1e; PE 16:0e/20:1; [M+H]+ C41H82NO7P---PE 36:1e; PE 16:1e/20:0; [M+H]+ C41H82NO7P	M+H 1+	732.594								44.9										4.98										0.54
432		SM d36:0; SM d14:0/22:0; [M+H]+ C41H85N2O6P---SM d36:0; SM d15:0/21:0; [M+H]+ C41H85N2O6P---SM d36:0; SM d16:0/20:0; [M+H]+ C41H85N2O6P---SM d36:0; SM d17:0/19:0; [M+H]+ C41H85N2O6P---SM d36:0; SM d18:0/18:0; [M+H]+ C41H85N2O6P---SM d36:0; SM d19:0/17:0; [M+H]+ C41H85N2O6P---SM d36:0; SM d20:0/16:0; [M+H]+ C41H85N2O6P---SM d36:0; SM d21:0/15:0; [M+H]+ C41H85N2O6P---SM d36:0; SM d22:0/14:0; [M+H]+…	M+H 1+	733.621								335.3										4.14										0.97
433		PC 32:0; PC 16:0-16:0; [M+H]+ C40H80NO8P	M+H 1+	734.571	51892.2	39639.8	65820.4	52327.9	66102	33161.4	24110.4	56563.9	97530.5	57059	4.01	4.02	4.02	4	4.02	4	4.02	4.02	4.02	4.02	0.96	0.96	0.96	0.96	0.96	0.96	0.96	0.96	0.96	0.96
434		PE 34:3; [M+Na]+; GPEtn(14:0/20:3(5Z,8Z,11Z)) C39H72NO8P---PE 34:3; [M+Na]+; GPEtn(14:0/20:3(8Z,11Z,14Z)) C39H72NO8P---PE 34:3; [M+Na]+; GPEtn(20:3(5Z,8Z,11Z)/14:0) C39H72NO8P---PE 34:3; [M+Na]+; GPEtn(20:3(8Z,11Z,14Z)/14:0) C39H72NO8P	M+Na 1+	736.497						167.5										3.55										0.62
435		TAG 42:2; TAG 12:0-12:0-18:2; [M+NH4]+ C45H82O6---TAG 42:2; TAG 12:0-14:1-16:1; [M+NH4]+ C45H82O6	M+NH4 1+	736.645		131.5	121.5	155.2								5.7	5.7	5.69								0.52	0.6	0.52
436		PE 34:2; [M+Na]+; GPEtn(16:0/18:2(2E,4E)) C39H74NO8P---PE 34:2; [M+Na]+; GPEtn(16:0/18:2(6Z,9Z)) C39H74NO8P---PE 34:2; [M+Na]+; GPEtn(16:0/18:2(9E,10E)) C39H74NO8P---PE 34:2; [M+Na]+; GPEtn(16:0/18:2(9E,12E)) C39H74NO8P---PE 34:2; [M+Na]+; GPEtn(16:0/18:2(9Z,11Z)) C39H74NO8P---PE 34:2; [M+Na]+; GPEtn(16:0/18:2(9Z,12Z)) C39H74NO8P---PE 34:2; [M+Na]+; GPEtn(17:1(9Z)/17:1(9Z)) C39H74NO8P---PE 34:2; …	M+Na 1+	738.504	396.9	510.2	329.6	239.4	513.5	258.5	275			298.8	3.95	3.94	3.95	3.94	3.95	3.94	3.93			3.94	0.75	0.7	0.78	0.75	0.75	0.76	0.78			0.76
437		PE 36:5; [M+H]+; GPEtn(14:0/22:5(4Z,7Z,10Z,13Z,16Z)) C41H72NO8P---PE 36:5; [M+H]+; GPEtn(14:0/22:5(7Z,10Z,13Z,16Z,19Z)) C41H72NO8P---PE 36:5; [M+H]+; GPEtn(22:5(4Z,7Z,10Z,13Z,16Z)/14:0) C41H72NO8P---PE 36:5; [M+H]+; GPEtn(22:5(7Z,10Z,13Z,16Z,19Z)/14:0) C41H72NO8P	M+H 1+	738.506					217.2										3.09										0.52
438		PE 36:5; [M+H]+; GPEtn(16:1(7Z)/20:4(5E,8E,11E,14E)) C41H72NO8P---PE 36:5; [M+H]+; GPEtn(16:1(7Z)/20:4(5Z,8Z,11Z,14Z)) C41H72NO8P---PE 36:5; [M+H]+; GPEtn(16:1(7Z)/20:4(7E,10E,13E,16E)) C41H72NO8P---PE 36:5; [M+H]+; GPEtn(16:1(9Z)/20:4(5E,8E,11E,14E)) C41H72NO8P---PE 36:5; [M+H]+; GPEtn(16:1(9Z)/20:4(5Z,8Z,11Z,14Z)) C41H72NO8P---PE 36:5; [M+H]+; GPEtn(16:1(9Z)/20:4(7E,10E,13E,16E)) C41H72NO8P---P…	M+H 1+	738.507	2840.4	2566.2		2305.5	4054.7	2246.2	1929.6		5583	2338.7	3.68	3.67		3.68	3.67	3.66	3.67		3.65	3.67	0.89	0.92		0.9	0.91	0.9	0.9		0.9	0.9
439		DGTS 34:1; DGTS 16:0-18:1; [M+H]+ C44H83NO7	M+H 1+	738.623	810.1	848.3	889.6	851.2	766.9	926	926	889.1		870.5	4.25	4.27	4.26	4.25	4.24	4.27	4.26	4.27		4.26	0.75	0.76	0.8	0.81	0.82	0.77	0.8	0.86		0.68
440		TAG 42:1; TAG 12:0-12:0-18:1; [M+NH4]+ C45H84O6---TAG 42:1; TAG 12:0-14:1-16:0; [M+NH4]+ C45H84O6	M+NH4 1+	738.66	660.7			340.2	343.5	193.5	201.3	484.9	222.4	349.9	5.87			5.87	5.87	5.87	5.87	5.88	5.88	5.88	0.61			0.6	0.64	0.77	0.74	0.59	0.74	0.67
441		1,2-Dilinoleoyl-sn-glycero-3-phosphoethanolamine [M+H]+ C41H74NO8P NIST 1197266---PE 36:4; PE 18:2-18:2; [M+H]+ C41H74NO8P	M+H 1+	740.518		20318.1	1167.8				1416.5	2655.3		22983.2		3.77	3.65				3.65	3.76		3.76		0.97	0.98				0.98	0.97		0.98
442		PE 36:4; [M+H]+; GPEtn(16:0/20:4(5E,8E,11E,14E)) C41H74NO8P---PE 36:4; [M+H]+; GPEtn(16:0/20:4(5Z,8Z,11Z,14Z)) C41H74NO8P---PE 36:4; [M+H]+; GPEtn(16:0/20:4(7E,10E,13E,16E)) C41H74NO8P---PE 36:4; [M+H]+; GPEtn(20:4(5E,8E,11E,14E)/16:0) C41H74NO8P---PE 36:4; [M+H]+; GPEtn(20:4(5Z,8Z,11Z,14Z)/16:0) C41H74NO8P---PE 36:4; [M+H]+; GPEtn(20:4(7E,10E,13E,16E)/16:0) C41H74NO8P	M+H 1+	740.523	34114.6	32413.6	35324.4	38974.7	53734.7	24639.7	20949.7	2523.3	58306.8	36656.3	3.93	3.92	3.91	3.92	3.92	3.92	3.91	3.91	3.92	3.92	0.91	0.91	0.9	0.91	0.91	0.91	0.9	0.89	0.9	0.91
443		TAG 42:0; TAG 12:0-14:0-16:0; [M+NH4]+ C45H86O6	M+NH4 1+	740.676	809.8	384.9	348.5		421.4	340	380.3	476.8	343.6	471.9	6.06	6.07	6.07		6.06	6.06	6.06	6.06	6.07	6.06	0.87	0.88	0.9		0.86	0.92	0.89	0.9	0.9	0.9
444		KDdiA-PC [M+H]+ C36H66NO11P NIST 1141370	M+Na 1+	742.43										107										1.69										0.84
445		PE 36:3; [M+H]+; GPEtn(18:1(11E)/18:2(2E,4E)) C41H76NO8P---PE 36:3; [M+H]+; GPEtn(18:1(11E)/18:2(6Z,9Z)) C41H76NO8P---PE 36:3; [M+H]+; GPEtn(18:1(11E)/18:2(9E,10E)) C41H76NO8P---PE 36:3; [M+H]+; GPEtn(18:1(11E)/18:2(9E,12E)) C41H76NO8P---PE 36:3; [M+H]+; GPEtn(18:1(11E)/18:2(9Z,11Z)) C41H76NO8P---PE 36:3; [M+H]+; GPEtn(18:1(11E)/18:2(9Z,12Z)) C41H76NO8P---PE 36:3; [M+H]+; GPEtn(18:1(11Z)/18:2(2E,…	M+H 1+	742.537	15318.8	10909	12193.3	10747.2	21801.6	17049	13357.8	4034.7	38284.6	13490.8	3.99	3.98	3.97	3.98	3.98	3.98	3.99	4	3.98	3.98	0.98	0.98	0.97	0.98	0.97	0.98	0.97	0.88	0.98	0.98
446		TAG 44:4; TAG 12:0-12:0-20:4; [M+NH4]+ C47H82O6---TAG 44:4; TAG 14:1-14:3-16:0; [M+NH4]+ C47H82O6	M+H 1+	743.616						42.8		120.1								5.87		5.88								0.65		0.56
447		PC 33:2; PC 15:0-18:2; [M+H]+ C41H78NO8P	M+H 1+	744.554	2800				4685.8	2686.6	1963.9		7254.7		3.66				3.67	3.66	3.67		3.65		0.9				0.92	0.92	0.9		0.9
448		PE 36:2; [M+H]+; GPEtn(18:0/18:2(2E,4E)) C41H78NO8P---PE 36:2; [M+H]+; GPEtn(18:0/18:2(6Z,9Z)) C41H78NO8P---PE 36:2; [M+H]+; GPEtn(18:0/18:2(9E,10E)) C41H78NO8P---PE 36:2; [M+H]+; GPEtn(18:0/18:2(9E,12E)) C41H78NO8P---PE 36:2; [M+H]+; GPEtn(18:0/18:2(9Z,11Z)) C41H78NO8P---PE 36:2; [M+H]+; GPEtn(18:0/18:2(9Z,12Z)) C41H78NO8P---PE 36:2; [M+H]+; GPEtn(18:1(11E)/18:1(11E)) C41H78NO8P---PE 36:2; [M+H]…	M+H 1+	744.555	20353.5	14214.4	13331.9	14614	30497.7	9248.2	7596.1	6832.2	23574.1	13550.4	4.29	4.29	4.28	4.29	4.29	4.27	4.26	4.27	4.26	4.29	0.98	0.98	0.98	0.98	0.98	0.98	0.98	0.98	0.98	0.98
449		1-Hexadecanoyl-2-octadecanoyl-sn-glycero-3-phosphocholine [M+H]+ C42H84NO8P NIST 1035284	M-H2O+H 1+	744.587	469.5	287.5	754.9	497.9			323.1		1292.4	793.1	4.05	4.06	4.06	4.04			4.06		4.04	4.04	0.54	0.5	0.62	0.56			0.55		0.57	0.54
450		1-Hexadecyl-2-(9Z-octadecenoyl)-sn-glycero-3-phosphocholine [M+H]+ C42H84NO7P NIST 1152410	M 1+	745.592					407.5										4.08										0.68
451		SM d37:1; SM d14:0/23:1; [M+H]+ C42H85N2O6P---SM d37:1; SM d14:1/23:0; [M+H]+ C42H85N2O6P---SM d37:1; SM d15:0/22:1; [M+H]+ C42H85N2O6P---SM d37:1; SM d15:1/22:0; [M+H]+ C42H85N2O6P---SM d37:1; SM d16:0/21:1; [M+H]+ C42H85N2O6P---SM d37:1; SM d16:1/21:0; [M+H]+ C42H85N2O6P---SM d37:1; SM d17:0/20:1; [M+H]+ C42H85N2O6P---SM d37:1; SM d17:1/20:0; [M+H]+ C42H85N2O6P---SM d37:1; SM d18:0/19:1; [M+H]+…	M+H 1+	745.621	575.1		492.6		381.2	217	113.7	1135	541.6		4.19		4.18		4.18	4.19	4.18	4.16	4.18		0.81		0.91		0.86	0.67	0.83	0.96	0.74
452		TAG 44:3; TAG 12:0-14:0-18:3; [M+NH4]+ C47H84O6---TAG 44:3; TAG 14:0-14:0-16:3; [M+NH4]+ C47H84O6	M+H 1+	745.626	142.7								72.8		6.04								6.05		0.71								0.7
452		TAG 42:0; TAG 12:0-14:0-16:0; [M+NH4]+ C45H86O6---TG 42:0; [M+Na]+; TG(12:0/14:0/16:0) C45H86O6	M+Na 1+	745.629				42.2				97.4						6.06				6.04						0.79				0.56
453		PC 33:1; PC 15:0-18:1; [M+H]+ C41H80NO8P---PC 33:1; PC 16:0-17:1; [M+H]+ C41H80NO8P	M+H 1+	746.569	3733.2	3838.3	4453.9	3708.3		3329.1	2897.1		7918.9	4716.9	3.91	3.9	3.91	3.9		3.9	3.91		3.92	3.9	0.9	0.92	0.91	0.9		0.9	0.91		0.9	0.9
454		PE 36:1; [M+H]+; GPEtn(18:0/18:1(11E)) C41H80NO8P---PE 36:1; [M+H]+; GPEtn(18:0/18:1(11Z)) C41H80NO8P---PE 36:1; [M+H]+; GPEtn(18:0/18:1(13Z)) C41H80NO8P---PE 36:1; [M+H]+; GPEtn(18:0/18:1(17Z)) C41H80NO8P---PE 36:1; [M+H]+; GPEtn(18:0/18:1(4E)) C41H80NO8P---PE 36:1; [M+H]+; GPEtn(18:0/18:1(6Z)) C41H80NO8P---PE 36:1; [M+H]+; GPEtn(18:0/18:1(7Z)) C41H80NO8P---PE 36:1; [M+H]+; GPEtn(18:0/18:1(9E)) …	M+H 1+	746.569	1505.2	907.6	993.5		2103.7	664.6	574.5	746.5	1862.9	952.5	4.52	4.52	4.51		4.53	4.52	4.51	4.52	4.51	4.52	0.98	0.98	0.97		0.98	0.97	0.96	0.95	0.97	0.98
455		1-Hexadecyl-2-(9Z-octadecenoyl)-sn-glycero-3-phosphocholine [M+H]+ C42H84NO7P NIST 1152410	M+H 1+	746.602			6951.2	6166.7	3190.5	3344	2312.9	2570.9	9228.7	5725.9			4.28	4.29	4.29	4.27	4.28	4.29	4.28	4.29			0.75	0.73	0.53	0.74	0.69	0.7	0.75	0.76
456		PE 38:7e; PE 16:1e/22:6; [M+H]+ C43H74NO7P---PE 38:7e; PE 16:2e/22:5; [M+H]+ C43H74NO7P---plasmenyl-PE 38:6; [M+H]+; PE(P-16:0/22:6(4Z,7Z,10Z,13Z,16Z,19Z)) C43H74NO7P	M+H 1+	748.527	1927.6	931.9	1165.5	1020.6	1444.6	881.8	677.4	3897.6	2091.8	1144.5	4.03	4.02	4.02	4.02	4.02	4.02	4.02	4.02	4.02	4.02	0.76	0.81	0.79	0.8	0.81	0.79	0.78	0.8	0.81	0.81
457		PC 33:0; PC 16:0-17:0; [M+H]+ C41H82NO8P	M+H 1+	748.584	924.4			707.6	1156.2		474.9				4.17			4.17	4.16		4.18				0.93			0.91	0.89		0.9
458	*	1-Hexadecanoyl-2-(9Z-octadecenoyl)-sn-glycero-3-phospho-(1'-rac-glycerol) [M+NH4]+ C40H77O10P NIST 1035662	M+H 1+	749.528	195.6				160.1						3.77				3.74						0.92				0.92
458	*	ISF of 1-Hexadecanoyl-2-(9Z-octadecenoyl)-sn-glycero-3-phospho-(1'-rac-glycerol) [M+NH4]+ C40H77O10P NIST 1035662	-	577.517					270.6										3.74										0.98
459		PE 38:6e; PE 16:0e/22:6; [M+H]+ C43H76NO7P---PE 38:6e; PE 16:1e/22:5; [M+H]+ C43H76NO7P---PE 38:6e; PE 16:2e/22:4; [M+H]+ C43H76NO7P	M+H 1+	750.544	3365.8	1419.6	2283.3	2271.2	2315		1644.5	2745.6		1578.2	4.13	4.12	4.14	4.13	4.12		4.14	4.12		4.14	0.59	0.6	0.56	0.61	0.58		0.5	0.72		0.6
460		1,2-Dipalmitoleoyl-sn-glycero-3-phosphocholine [M+Na]+ C40H76NO8P NIST 1150174	M+Na 1+	752.521	160.1			198		213.7	155.7	147.5	601.9		3.51			3.49		3.47	3.48	3.5	3.49		0.93			0.9		0.85	0.9	0.9	0.9
461		PE 37:5; [M+H]+; GPEtn(17:1(9Z)/20:4(5E,8E,11E,14E)) C42H74NO8P---PE 37:5; [M+H]+; GPEtn(17:1(9Z)/20:4(5Z,8Z,11Z,14Z)) C42H74NO8P---PE 37:5; [M+H]+; GPEtn(17:1(9Z)/20:4(7E,10E,13E,16E)) C42H74NO8P---PE 37:5; [M+H]+; GPEtn(20:4(5E,8E,11E,14E)/17:1(9Z)) C42H74NO8P---PE 37:5; [M+H]+; GPEtn(20:4(5Z,8Z,11Z,14Z)/17:1(9Z)) C42H74NO8P---PE 37:5; [M+H]+; GPEtn(20:4(7E,10E,13E,16E)/17:1(9Z)) C42H74NO8P	M+H 1+	752.524			164.3										3.79										0.88
462		1,2-Dipalmitoleoyl-sn-glycero-3-phosphocholine [M+H]+ C40H76NO8P NIST 1150149---1,2-Dipalmitoleoyl-sn-glycero-3-phosphocholine [M+H]+ C40H76NO8P NIST 1150151	M+Na 1+	752.523						44	38.6,27.7		137.6							3.24	3.27,1.44		3.29							0.67	0.57,0.60		0.82
463		1-(1Z-Octadecenyl)-2-(5Z,8Z,11Z,14Z-eicosatetraenoyl)-sn-glycero-3-phosphoethanolamine [M+H]+ C43H78NO7P NIST 1150823---PE 38:5e; PE 16:0e/22:5; [M+H]+ C43H78NO7P---PE 38:5e; PE 16:1e/22:4; [M+H]+ C43H78NO7P---PE 38:5e; PE 16:2e/22:3; [M+H]+ C43H78NO7P---plasmenyl-PE 38:4; [M+H]+; PE(P-16:0/22:4(7Z,10Z,13Z,16Z)) C43H78NO7P	M+H 1+	752.559	15844.1	10037.2	10708.6	12869.3	12138.6	11201.8	8804.2	10479	13617.2	11511.5	4.48	4.37	4.36	4.36	4.36	4.37	4.36	4.36	4.36	4.36	0.76	0.78	0.79	0.76	0.78	0.73	0.71	0.74	0.76	0.78
464		TAG 43:1; TAG 12:0-15:0-16:1; [M+NH4]+ C46H86O6---TAG 43:1; TAG 13:0-14:0-16:1; [M+NH4]+ C46H86O6---TAG 43:1; TAG 14:0-14:1-15:0; [M+NH4]+ C46H86O6	M+NH4 1+	752.676	504.1	203.6		286.1	271.3	117.2	164.1	267.3	168	276.3	5.97	5.97		5.89	5.97	5.98	5.98	5.98	5.97	5.98	0.66	0.72		0.53	0.71	0.65	0.64	0.68	0.77	0.7
465		PC 32:1; [M+Na]+; GPCho(10:0/22:1(13Z)) C40H78NO8P---PC 32:1; [M+Na]+; GPCho(16:0/16:1(7Z)) C40H78NO8P---PC 32:1; [M+Na]+; GPCho(16:0/16:1(9Z)) C40H78NO8P---PC 32:1; [M+Na]+; GPCho(16:1(7Z)/16:0) C40H78NO8P---PC 32:1; [M+Na]+; GPCho(16:1(9Z)/16:0) C40H78NO8P---PC 32:1; [M+Na]+; GPCho(22:1(13Z)/10:0) C40H78NO8P	M+Na 1+	754.535		567.7	621.1	695.1	528.1	585	674.5	648.2	684.4	616.8		3.74	3.74	3.75	3.74	3.75	3.76	3.75	3.74	3.74		0.87	0.84	0.82	0.83	0.85	0.85	0.8	0.82	0.88
466		PE 37:4; [M+H]+; GPEtn(17:0/20:4(5E,8E,11E,14E)) C42H76NO8P---PE 37:4; [M+H]+; GPEtn(17:0/20:4(5Z,8Z,11Z,14Z)) C42H76NO8P---PE 37:4; [M+H]+; GPEtn(17:0/20:4(7E,10E,13E,16E)) C42H76NO8P---PE 37:4; [M+H]+; GPEtn(20:4(5E,8E,11E,14E)/17:0) C42H76NO8P---PE 37:4; [M+H]+; GPEtn(20:4(5Z,8Z,11Z,14Z)/17:0) C42H76NO8P---PE 37:4; [M+H]+; GPEtn(20:4(7E,10E,13E,16E)/17:0) C42H76NO8P	M+H 1+	754.538	1533.4	1386.7		922.1	2513.7		750.6		2670.4	1445.2	4.09	4.08		4.09	4.08		4.08		4.08	4.08	0.91	0.91		0.89	0.89		0.91		0.91	0.9
467		1-(9Z-Octadecenoyl)-2-tetradecanoyl-sn-glycero-3-phosphocholine [M+H]+ C40H78NO8P NIST 1150401	M+Na 1+	754.538	1057.2	762.7	1817.3		1698	1504.4	1202.4	610.5	4182.8		3.43	3.42	3.44		3.42	3.45	3.44	3.49	3.45		0.91	0.92	0.92		0.9	0.93	0.92	0.91	0.95
468		PE 38:4e; PE 18:0e/20:4; [M+H]+ C43H80NO7P---PE 38:4e; PE 18:1e/20:3; [M+H]+ C43H80NO7P---PE 38:4e; PE 18:2e/20:2; [M+H]+ C43H80NO7P---PE 38:4e; PE 18:3e/20:1; [M+H]+ C43H80NO7P---PE 38:4e; PE 18:4e/20:0; [M+H]+ C43H80NO7P	M+H 1+	754.569			1218.6	1424.6									4.47	4.45									0.77	0.76
469		TAG 43:0; TAG 13:0-14:0-16:0; [M+NH4]+ C46H88O6---TAG 43:0; TAG 14:0-14:0-15:0; [M+NH4]+ C46H88O6	M+NH4 1+	754.691	617.6	293.2		254.8	341.6	258.9	290.9	359.7	273.1	418.4	6.14	6.13		6.14	6.14	6.14	6.14	6.15	6.15	6.15	0.77	0.78		0.69	0.77	0.81	0.74	0.77	0.82	0.77
470		1-Stearoyl-2-myristoyl-sn-glycero-3-phosphocholine [M+H]+ C40H80NO8P NIST 1150367	M+Na 1+	756.547				498.6	1021.3									2.92	2.94									0.9	0.89
471		PC 32:0; [M+Na]+; GPCho(16:0/16:0) C40H80NO8P	M+Na 1+	756.552	2013	2118.7	2350.5	2095.2	2034.4	1721.3	1527.7	2288.5	2150.2	2257.1	4.01	4.03	4.02	4.03	4.02	4.02	4.03	4.02	4.02	4.02	0.82	0.81	0.78	0.81	0.81	0.81	0.82	0.86	0.8	0.81
472		1-Myristoyl-2-stearoyl-sn-glycero-3-phosphocholine [M+H]+ C40H80NO8P NIST 1150247	M+Na 1+	756.555	30903.5	20957.2	43988.2	29222.7	50303.6	31252.1	25026.5	9093.9	97251.5	33274.1	3.6	3.61	3.6	3.61	3.61	3.58	3.58	3.58	3.57	3.61	0.95	0.96	0.96	0.95	0.96	0.96	0.96	0.96	0.96	0.95
473		PE 38:3e; PE 16:0e/22:3; [M+H]+ C43H82NO7P---PE 38:3e; PE 16:1e/22:2; [M+H]+ C43H82NO7P---PE 38:3e; PE 16:2e/22:1; [M+H]+ C43H82NO7P	M+H 1+	756.59								68.7										4.77										0.51
474		HexCer-NS d38:1; HexCer-NS d18:1/20:0; [M+H]+ C44H85NO8	M+H 1+	756.632			204.5	238						362.5			4.53	4.54						4.66			0.57	0.64						0.57
475		SM d38:2; SM d14:0/24:2; [M+H]+ C43H85N2O6P---SM d38:2; SM d14:1/24:1; [M+H]+ C43H85N2O6P---SM d38:2; SM d14:2/24:0; [M+H]+ C43H85N2O6P---SM d38:2; SM d15:1/23:1; [M+H]+ C43H85N2O6P---SM d38:2; SM d15:2/23:0; [M+H]+ C43H85N2O6P---SM d38:2; SM d16:0/22:2; [M+H]+ C43H85N2O6P---SM d38:2; SM d16:1/22:1; [M+H]+ C43H85N2O6P---SM d38:2; SM d16:2/22:0; [M+H]+ C43H85N2O6P---SM d38:2; SM d17:1/21:1; [M+H]+…	M+H 1+	757.621			411	388.3	349.6								4.08	4.09	4.08								0.9	0.92	0.85
476		1-Hexadecanoyl-2-octadecadienoyl-sn-glycero-3-phosphocholine [M+H]+ C42H80NO8P NIST 1035272---1-Hexadecanoyl-2-octadecadienoyl-sn-glycero-3-phosphocholine [M+H]+ C42H80NO8P NIST 1035273---1-Palmitoyl-2-linoleoyl-sn-glycero-3-phosphocholine [M+H]+ C42H80NO8P NIST 1150350	M+H 1+	758.569	80.3				127.1				132.4		9.81				9.81				9.81		0.89				0.73				0.99
477		1-Hexadecanoyl-2-(9Z-octadecenoyl)-sn-glycero-3-phosphocholine [M+H]+ C42H82NO8P NIST 1035290	M 1+	759.577					157.1										5.83										0.71
478		SM d38:1; SM d14:0/24:1; [M+H]+ C43H87N2O6P---SM d38:1; SM d14:1/24:0; [M+H]+ C43H87N2O6P---SM d38:1; SM d15:0/23:1; [M+H]+ C43H87N2O6P---SM d38:1; SM d15:1/23:0; [M+H]+ C43H87N2O6P---SM d38:1; SM d16:0/22:1; [M+H]+ C43H87N2O6P---SM d38:1; SM d16:1/22:0; [M+H]+ C43H87N2O6P---SM d38:1; SM d17:0/21:1; [M+H]+ C43H87N2O6P---SM d38:1; SM d17:1/21:0; [M+H]+ C43H87N2O6P---SM d38:1; SM d18:0/20:1; [M+H]+…	M+H 1+	759.637	4484.4	1526.1	2681.3	3295	4617.8	951.1	686.3	2008.1	3587.2	2443.9	4.35	4.35	4.36	4.35	4.35	4.35	4.37	4.35	4.37	4.35	0.98	0.97	0.97	0.98	0.98	0.96	0.93	0.98	0.97	0.98
479		PE 36:5; [M+Na]+; GPEtn(14:0/22:5(4Z,7Z,10Z,13Z,16Z)) C41H72NO8P---PE 36:5; [M+Na]+; GPEtn(14:0/22:5(7Z,10Z,13Z,16Z,19Z)) C41H72NO8P---PE 36:5; [M+Na]+; GPEtn(22:5(4Z,7Z,10Z,13Z,16Z)/14:0) C41H72NO8P---PE 36:5; [M+Na]+; GPEtn(22:5(7Z,10Z,13Z,16Z,19Z)/14:0) C41H72NO8P	M+Na 1+	760.493	146.3			116.9		92.5			186.7		3.66			3.66		3.64			3.61		0.55			0.61		0.7			0.66
480		1-Hexadecanoyl-2-(9Z-octadecenoyl)-sn-glycero-3-phosphocholine [M+H]+ C42H82NO8P NIST 1035293---1-Hexadecanoyl-2-(9Z-octadecenoyl)-sn-glycero-3-phosphocholine [M+H]+ C42H82NO8P NIST 1035296	M+H 1+	760.584		60.5	62.8						91.8	46.8		9.83	9.8						9.83	9.82		0.95	0.87						0.9	0.94
481		TAG 44:4; TAG 14:0-15:2-15:2; [M+NH4]+ C47H82O6	M+NH4 1+	760.645			93.7										5.47										0.67
482		PE 36:4; [M+Na]+; GPEtn(16:0/20:4(5E,8E,11E,14E)) C41H74NO8P---PE 36:4; [M+Na]+; GPEtn(16:0/20:4(5Z,8Z,11Z,14Z)) C41H74NO8P---PE 36:4; [M+Na]+; GPEtn(16:0/20:4(7E,10E,13E,16E)) C41H74NO8P---PE 36:4; [M+Na]+; GPEtn(18:2(2E,4E)/18:2(2E,4E)) C41H74NO8P---PE 36:4; [M+Na]+; GPEtn(18:2(2E,4E)/18:2(6Z,9Z)) C41H74NO8P---PE 36:4; [M+Na]+; GPEtn(18:2(2E,4E)/18:2(9E,10E)) C41H74NO8P---PE 36:4; [M+Na]+; GPEt…	M+Na 1+	762.505	638.5	726.9	328.8		722.8	557.2	582.7		500.2	313.4	3.94	3.92	3.05		3.93	3.93	3.95		3.92	3.06	0.83	0.81	0.63		0.79	0.81	0.79		0.79	0.63
483		PE 38:7; [M+H]+; GPEtn(16:1(7Z)/22:6(4Z,7Z,10Z,13Z,16Z,19Z)) C43H72NO8P---PE 38:7; [M+H]+; GPEtn(16:1(9Z)/22:6(4Z,7Z,10Z,13Z,16Z,19Z)) C43H72NO8P---PE 38:7; [M+H]+; GPEtn(22:6(4Z,7Z,10Z,13Z,16Z,19Z)/16:1(7Z)) C43H72NO8P---PE 38:7; [M+H]+; GPEtn(22:6(4Z,7Z,10Z,13Z,16Z,19Z)/16:1(9Z)) C43H72NO8P	M+H 1+	762.507	1397.6	1101.1	1299.8		1703.1	1301	1055.5	639.5	3260.9	2060.9	3.6	3.59	3.58		3.59	3.58	3.58	3.71	3.57	3.69	0.97	0.97	0.97		0.97	0.96	0.97	0.93	0.97	0.96
484		1-Hexadecanoyl-2-octadecanoyl-sn-glycero-3-phosphocholine [M+H]+ C42H84NO8P NIST 1035284---PC 34:0; PC 16:0-18:0; [M+H]+ C42H84NO8P	M+H 1+	762.601	5037.7	2900.9	5934.7	4793.8	6417.1	2428.4	1753.6	6109.5	7925.4	4554.5	4.35	4.35	4.36	4.35	4.35	4.35	4.37	4.35	4.37	4.35	0.92	0.92	0.93	0.92	0.91	0.92	0.93	0.93	0.92	0.92
485		TAG 44:3; TAG 14:1-14:1-16:1; [M+NH4]+ C47H84O6	M+NH4 1+	762.66					91.9					115.3					5.78					5.77					0.55					0.66
486	*	2-Docosahexaenoyl-1-palmitoyl-sn-glycero-3-phosphoethanolamine [M+H]+ C43H74NO8P NIST 1197278---PE 38:6; [M+H]+; GPEtn(18:2(2E,4E)/20:4(5E,8E,11E,14E)) C43H74NO8P---PE 38:6; [M+H]+; GPEtn(18:2(2E,4E)/20:4(5Z,8Z,11Z,14Z)) C43H74NO8P---PE 38:6; [M+H]+; GPEtn(18:2(2E,4E)/20:4(7E,10E,13E,16E)) C43H74NO8P---PE 38:6; [M+H]+; GPEtn(18:2(6Z,9Z)/20:4(5E,8E,11E,14E)) C43H74NO8P---PE 38:6; [M+H]+; GPEtn(18:…	M+H 1+	764.523	62279	60897.2	53115.8	56016.2	78322.6	38806.1	32374.7	11822.7	69674.2	57897.4	3.85	3.86	3.85	3.84	3.86	3.84	3.85	3.85	3.86	3.86	0.98	0.98	0.98	0.98	0.98	0.98	0.98	0.98	0.98	0.98
486	*	ISF of 2-Docosahexaenoyl-1-palmitoyl-sn-glycero-3-phosphoethanolamine [M+H]+ C43H74NO8P NIST 1197278---PE 38:6; [M+H]+; GPEtn(18:2(2E,4E)/20:4(5E,8E,11E,14E)) C43H74NO8P	-	623.503	901.2	1089.6	957.6	840.5	1106.7	494.3	520.7	186.9	921.6	845.5	3.85	3.86	3.85	3.86	3.86	3.84	3.85	3.85	3.86	3.86	0.98	0.98	0.98	0.98	0.98	0.98	0.98	0.97	0.98	0.98
487		PG 34:2; PG 16:0-18:2; [M+NH4]+ C40H75O10P	M+NH4 1+	764.541				71.9										3.53										0.81
488		DGTS 36:2; DGTS 18:1-18:1; [M+H]+ C46H85NO7	M+H 1+	764.637	1876.3	1807.4	1778.2	1836	1585.6	2070.9	2041.1	1616.9	2017.9	2158.5	4.31	4.29	4.28	4.29	4.29	4.31	4.28	4.29	4.28	4.31	0.8	0.82	0.74	0.79	0.76	0.8	0.86	0.82	0.78	0.81
489		TAG 44:2; TAG 12:0-14:0-18:2; [M+NH4]+ C47H86O6---TAG 44:2; TAG 12:0-14:1-18:1; [M+NH4]+ C47H86O6---TAG 44:2; TAG 12:1-16:0-16:1; [M+NH4]+ C47H86O6---TAG 44:2; TAG 14:0-14:1-16:1; [M+NH4]+ C47H86O6	M+NH4 1+	764.675	1449.3	219.6	216.9	490.6	305.9	136.1	211.1	696.9	180.1	350.2	5.93	5.93	5.92	5.92	5.93	5.94	5.92	5.92	5.92	5.92	0.54	0.65	0.59	0.64	0.7	0.72	0.67	0.56	0.65	0.71
490		1,2-Di-(9Z-octadecenoyl)-sn-glycero-3-phosphoethanolamine [M+Na]+ C41H78NO8P NIST 1150530	M+Na 1+	766.537		749						492.2	4228.9	5834.4		4.32						4.29	3.69	3.69		0.78						0.79	0.53	0.5
490		PE 38:5; [M+H]+; GPEtn(18:1(11E)/20:4(5E,8E,11E,14E)) C43H76NO8P---PE 38:5; [M+H]+; GPEtn(18:1(11E)/20:4(5Z,8Z,11Z,14Z)) C43H76NO8P---PE 38:5; [M+H]+; GPEtn(18:1(11E)/20:4(7E,10E,13E,16E)) C43H76NO8P---PE 38:5; [M+H]+; GPEtn(18:1(11Z)/20:4(5E,8E,11E,14E)) C43H76NO8P---PE 38:5; [M+H]+; GPEtn(18:1(11Z)/20:4(5Z,8Z,11Z,14Z)) C43H76NO8P---PE 38:5; [M+H]+; GPEtn(18:1(11Z)/20:4(7E,10E,13E,16E)) C43H76NO…	M+H 1+	766.539	30999.3	22379	29657.5	28012.8	43280.3	29742.7	23873.7	4339.5	74962.9	25553.7	3.97	3.94	3.97	3.96	3.96	3.96	3.97	3.98	3.96	3.96	0.9	0.92	0.9	0.92	0.91	0.91	0.9	0.83	0.92	0.91
491		PG 34:1; PG 16:0-18:1; [M+NH4]+ C40H77O10P	M+NH4 1+	766.552							237.5										3.73										0.84
492		TAG 44:1; TAG 12:0-14:0-18:1; [M+NH4]+ C47H88O6---TAG 44:1; TAG 12:0-16:0-16:1; [M+NH4]+ C47H88O6---TAG 44:1; TAG 14:0-14:0-16:1; [M+NH4]+ C47H88O6---TAG 44:1; TAG 14:0-14:1-16:0; [M+NH4]+ C47H88O6	M+NH4 1+	766.691	2224.5	571.3	484.6	1057.7	693.8	412	531.4	1190.4	454.3	834.2	6.1	6.09	6.09	6.08	6.1	6.1	6.1	6.08	6.09	6.08	0.69	0.7	0.71	0.7	0.69	0.69	0.71	0.7	0.7	0.69
493		PC 35:4; PC 15:0-20:4; [M+H]+ C43H78NO8P	M+H 1+	768.554			1264.3						3315.9				3.65						3.63				0.89						0.92
494		1-Stearoyl-2-oleoyl-sn-glycero-3-phosphoethanolamine [M+Na]+ C41H80NO8P NIST 1035417	M+Na 1+	768.555	104658	81673.5	97529.4	109103	142004	51257.6	39706	12337	118968	98003.3	4.25	4.27	4.26	4.27	4.27	4.27	4.26	4.27	4.26	4.26	0.94	0.94	0.94	0.94	0.94	0.94	0.94	0.94	0.94	0.94
494		PE 38:4; [M+H]+; GPEtn(18:1(11E)/20:3(5Z,8Z,11Z)) C43H78NO8P---PE 38:4; [M+H]+; GPEtn(18:1(11E)/20:3(8Z,11Z,14Z)) C43H78NO8P---PE 38:4; [M+H]+; GPEtn(18:1(11Z)/20:3(5Z,8Z,11Z)) C43H78NO8P---PE 38:4; [M+H]+; GPEtn(18:1(11Z)/20:3(8Z,11Z,14Z)) C43H78NO8P---PE 38:4; [M+H]+; GPEtn(18:1(13Z)/20:3(5Z,8Z,11Z)) C43H78NO8P---PE 38:4; [M+H]+; GPEtn(18:1(13Z)/20:3(8Z,11Z,14Z)) C43H78NO8P---PE 38:4; [M+H]+; G…	M+H 1+	768.554	77216.7	54142.6	53822.2	71738		38079		8726.9	77887.2	62357.6	4.12	4.12	4.11	4.12		4.12		4.11	4.11	4.11	0.97	0.97	0.96	0.97		0.96		0.9	0.96	0.97
495		1,2-Di-(9Z-octadecenoyl)-sn-glycero-3-phosphocholine [M+H]+ C44H84NO8P NIST 1035216---1,2-Di-(9Z-octadecenoyl)-sn-glycero-3-phosphocholine [M+H]+ C44H84NO8P NIST 1035219---1,2-Di-(9Z-octadecenoyl)-sn-glycero-3-phosphocholine [M+H]+ C44H84NO8P NIST 1035223	M-H2O+H 1+	768.582	1365.4	1061.7	1551.7	1290.4		1524.1		829.4	1694.5	2344.3	4.03	4.02	4.02	4.02		4.02		4.04	4.02	4.02	0.57	0.7	0.6	0.69		0.68		0.63	0.7	0.72
496		TAG 44:0; TAG 14:0-14:0-16:0; [M+NH4]+ C47H90O6	M+NH4 1+	768.707	2274.2	714.3	603.8		630.4	577	787.3	1276.6	672.6	919.2	6.26	6.26	6.25		6.24	6.26	6.25	6.25	6.26	6.25	0.89	0.84	0.84		0.86	0.86	0.84	0.9	0.81	0.86
497	*	ISF of PC 35:3; PC 17:1-18:2; [M+H]+ C43H80NO8P	-	758.569					804868										3.84										0.97
498		TAG 46:5; TAG 14:0-16:0-16:5; [M+NH4]+ C49H84O6---TAG 46:5; TAG 14:0-16:1-16:4; [M+NH4]+ C49H84O6	M+H 1+	769.632	311.8							145.8		83.8	5.93							5.92		5.94	0.55							0.67		0.54
499		PC 35:3; PC 17:1-18:2; [M+H]+ C43H80NO8P	M+H 1+	770.569	2986.9			1874.9		3891.7			7860.9	3351.3	3.72			3.72		3.72			3.72	3.74	0.9			0.83		0.9			0.92	0.88
500		PE 38:3; [M+H]+; GPEtn(18:0/20:3(5Z,8Z,11Z)) C43H80NO8P---PE 38:3; [M+H]+; GPEtn(18:0/20:3(8Z,11Z,14Z)) C43H80NO8P---PE 38:3; [M+H]+; GPEtn(20:3(5Z,8Z,11Z)/18:0) C43H80NO8P---PE 38:3; [M+H]+; GPEtn(20:3(8Z,11Z,14Z)/18:0) C43H80NO8P	M+H 1+	770.57	12400		3536				3793.7		12307.6		4.41		4.38				4.42		4.42		0.97		0.97				0.96		0.95
501		1-Octadecanoyl-2-octadecenoyl-sn-glycero-3-phosphocholine [M+H]+ C44H86NO8P NIST 1035317---1-Octadecanoyl-2-octadecenoyl-sn-glycero-3-phosphocholine [M+Na]+ C44H86NO8P NIST 1035322	M-H2O+H 1+	770.6				374.8	505.1	565.4	253.2	322.2	945.2	666.8				4.07	4.06	4.11	4.06	4.1	4.06	4.08				0.54	0.5	0.63	0.51	0.72	0.54	0.58
502	*	ISF of PC 35:2; PC 17:1-18:1; [M+H]+ C43H82NO8P	-	760.587		216675	319222			161841				270903		4.06	4.08			4.07				4.08		0.99	0.98			0.98				0.98
502	*	PC 35:2; PC 17:1-18:1; [M+H]+ C43H82NO8P	M 1+	771.576		407.8	369.8							286.7		4.06	4.06							4.06		0.56	0.6							0.6
503		SM d39:2; SM d14:1/25:1; [M+H]+ C44H87N2O6P---SM d39:2; SM d14:2/25:0; [M+H]+ C44H87N2O6P---SM d39:2; SM d15:0/24:2; [M+H]+ C44H87N2O6P---SM d39:2; SM d15:1/24:1; [M+H]+ C44H87N2O6P---SM d39:2; SM d15:2/24:0; [M+H]+ C44H87N2O6P---SM d39:2; SM d16:1/23:1; [M+H]+ C44H87N2O6P---SM d39:2; SM d16:2/23:0; [M+H]+ C44H87N2O6P---SM d39:2; SM d17:0/22:2; [M+H]+ C44H87N2O6P---SM d39:2; SM d17:1/22:1; [M+H]+…	M+H 1+	771.635									534.9	167.6									4.22	4.2									0.65	0.84
504		TAG 44:1; TAG 14:0-14:1-16:0; [M+NH4]+ C47H88O6---TAG 44:1; TAG 14:0-14:1-16:0; [M+Na]+ C47H88O6	M+Na 1+	771.647	276.2				115.9						6.08				6.1						0.65				0.53
504		TAG 46:4; TAG 12:0-14:0-20:4; [M+NH4]+ C49H86O6	M+H 1+	771.646		126.7										6.09										0.79
505		1-Palmitoyl-2-thiopalmitoyl phosphatidylcholine [M+H]+ C40H80NO7PS NIST 1217420	M+Na 1+	772.526									88.8										4.04										0.88
506		PC 35:5; PC 17:1-18:4; [M+H]+ C43H76NO8P	M+Li 1+	772.547			3804.6										2.99										0.8
507		PE 38:2; [M+H]+; GPEtn(18:0/20:2(11Z,14Z)) C43H82NO8P---PE 38:2; [M+H]+; GPEtn(18:0/20:2(5Z,8Z)) C43H82NO8P---PE 38:2; [M+H]+; GPEtn(18:1(11E)/20:1(11E)) C43H82NO8P---PE 38:2; [M+H]+; GPEtn(18:1(11E)/20:1(11Z)) C43H82NO8P---PE 38:2; [M+H]+; GPEtn(18:1(11E)/20:1(13E)) C43H82NO8P---PE 38:2; [M+H]+; GPEtn(18:1(11E)/20:1(13Z)) C43H82NO8P---PE 38:2; [M+H]+; GPEtn(18:1(11Z)/20:1(11E)) C43H82NO8P---PE 3…	M+H 1+	772.584						423.4	370.7	267	1212.4	792.5						4.56	4.57	4.56	4.57	4.58						0.97	0.96	0.93	0.97	0.96
508		Eicosapentaenoyl PAF C-16 [M+H]+ C44H80NO7P NIST 1204801---Eicosapentaenoyl PAF C-16 [M+H]+ C44H80NO7P NIST 1204802	M+Li 1+	772.584	11629.4	7620.2	10941.9	7508.4	18668.2	9831.1		4170.3	24957.9	11040.2	3.99	4	3.99	3.98	3.98	3.98		4	3.98	3.98	0.9	0.83	0.92	0.81	0.93	0.92		0.89	0.92	0.91
508		PC 35:2; PC 17:0-18:2; [M+H]+ C43H82NO8P	M+H 1+	772.584							6457.9										3.99										0.9
509		1,2-Distearoyl-sn-glycero-3-phosphocholine [M+H]+ C44H88NO8P NIST 1197156	M-H2O+H 1+	772.62			1028.6			384.8			1368.8	no_ms1_feature			4.38			4.37			4.37	3.95			0.69			0.7			0.66	0.99
510		SM d39:1; SM d14:0/25:1; [M+H]+ C44H89N2O6P---SM d39:1; SM d14:1/25:0; [M+H]+ C44H89N2O6P---SM d39:1; SM d15:0/24:1; [M+H]+ C44H89N2O6P---SM d39:1; SM d15:1/24:0; [M+H]+ C44H89N2O6P---SM d39:1; SM d16:0/23:1; [M+H]+ C44H89N2O6P---SM d39:1; SM d16:1/23:0; [M+H]+ C44H89N2O6P---SM d39:1; SM d17:0/22:1; [M+H]+ C44H89N2O6P---SM d39:1; SM d17:1/22:0; [M+H]+ C44H89N2O6P---SM d39:1; SM d18:0/21:1; [M+H]+…	M+H 1+	773.652	1103.3		925.8	1103.6	2333.7	367.4		400.1	1135.4	776.8	4.52		4.53	4.54	4.54	4.54		4.5	4.53	4.54	0.77		0.83	0.82	0.91	0.72		0.79	0.74	0.79
511		TAG 46:3; TAG 14:0-16:0-16:3; [M+NH4]+ C49H88O6	M+H 1+	773.662								100.6										6.25										0.55
512		PC 35:1; PC 17:0-18:1; [M+H]+ C43H84NO8P	M+H 1+	774.601	3761.8		3638.8				1954.6		7148		4.23		4.24				4.24		4.24		0.92		0.9				0.91		0.91
513		PE 38:1; [M+H]+; GPEtn(18:0/20:1(11E)) C43H84NO8P---PE 38:1; [M+H]+; GPEtn(18:0/20:1(11Z)) C43H84NO8P---PE 38:1; [M+H]+; GPEtn(18:0/20:1(13E)) C43H84NO8P---PE 38:1; [M+H]+; GPEtn(18:0/20:1(13Z)) C43H84NO8P---PE 38:1; [M+H]+; GPEtn(20:1(11E)/18:0) C43H84NO8P---PE 38:1; [M+H]+; GPEtn(20:1(11Z)/18:0) C43H84NO8P---PE 38:1; [M+H]+; GPEtn(20:1(13E)/18:0) C43H84NO8P---PE 38:1; [M+H]+; GPEtn(20:1(13Z)/18…	M+H 1+	774.601		269.4		321.7			83					4.83		4.81			4.82					0.96		0.89			0.94
514		PE 39:7; [M+H]+; GPEtn(17:1(9Z)/22:6(4Z,7Z,10Z,13Z,16Z,19Z)) C44H74NO8P---PE 39:7; [M+H]+; GPEtn(22:6(4Z,7Z,10Z,13Z,16Z,19Z)/17:1(9Z)) C44H74NO8P	M+H 1+	776.524									486.3										3.74										0.93
515		PC 34:4; [M+Na]+; GPCho(14:0/20:4(5E,8E,11E,14E)) C42H76NO8P---PC 34:4; [M+Na]+; GPCho(14:0/20:4(5Z,8Z,11Z,14Z)) C42H76NO8P---PC 34:4; [M+Na]+; GPCho(14:0/20:4(7E,10E,13E,16E)) C42H76NO8P---PC 34:4; [M+Na]+; GPCho(17:2(9Z,12Z)/17:2(9Z,12Z)) C42H76NO8P---PC 34:4; [M+Na]+; GPCho(20:4(5E,8E,11E,14E)/14:0) C42H76NO8P---PC 34:4; [M+Na]+; GPCho(20:4(5Z,8Z,11Z,14Z)/14:0) C42H76NO8P---PC 34:4; [M+Na]+; G…	M+Na 1+	776.525							69.5		272								3.46		3.48								0.67		0.89
516		PE 40:7e; PE 18:1e/22:6; [M+H]+ C45H78NO7P---PE 40:7e; PE 18:2e/22:5; [M+H]+ C45H78NO7P---PE 40:7e; PE 18:3e/22:4; [M+H]+ C45H78NO7P---PE 40:7e; PE 18:4e/22:3; [M+H]+ C45H78NO7P---PE 40:7e; PE 18:5e/22:2; [M+H]+ C45H78NO7P---plasmenyl-PE 40:6; [M+H]+; PE(P-18:0/22:6(4Z,7Z,10Z,13Z,16Z,19Z)) C45H78NO7P	M+H 1+	776.559	1175.4	574.4	775	610.7	1073.7	504.7	407.3	2583.6	1310.4	657.7	4.35	4.37	4.36	4.37	4.37	4.35	4.37	4.37	4.37	4.37	0.77	0.8	0.8	0.78	0.81	0.79	0.74	0.81	0.79	0.77
517		TAG 45:3; TAG 14:1-15:1-16:1; [M+NH4]+ C48H86O6	M+NH4 1+	776.677	181.8						58.9				5.87						5.9				0.66						0.8
518		PC 34:3; [M+Na]+; GPCho(16:1(7Z)/18:2(2E,4E)) C42H78NO8P---PC 34:3; [M+Na]+; GPCho(16:1(7Z)/18:2(6Z,9Z)) C42H78NO8P---PC 34:3; [M+Na]+; GPCho(16:1(7Z)/18:2(9E,10E)) C42H78NO8P---PC 34:3; [M+Na]+; GPCho(16:1(7Z)/18:2(9E,12E)) C42H78NO8P---PC 34:3; [M+Na]+; GPCho(16:1(7Z)/18:2(9Z,11Z)) C42H78NO8P---PC 34:3; [M+Na]+; GPCho(16:1(7Z)/18:2(9Z,12Z)) C42H78NO8P---PC 34:3; [M+Na]+; GPCho(16:1(9Z)/18:2(2E,…	M+Na 1+	778.537	2039.3	1443	2564.8	2319	3270.3	2092.4	1696.7	1201.4	4184.2	2679.2	3.58	3.59	3.58	3.53	3.55	3.58	3.58	3.52	3.57	3.55	0.88	0.88	0.87	0.89	0.86	0.87	0.87	0.87	0.87	0.87
519		PE 39:6; [M+H]+; GPEtn(17:0/22:6(4Z,7Z,10Z,13Z,16Z,19Z)) C44H76NO8P---PE 39:6; [M+H]+; GPEtn(22:6(4Z,7Z,10Z,13Z,16Z,19Z)/17:0) C44H76NO8P	M+H 1+	778.539	811.8	571.3					365.4				4.01	4.02					4.02				0.93	0.92					0.9
520		PE 40:6e; PE 18:0e/22:6; [M+H]+ C45H80NO7P---PE 40:6e; PE 18:1e/22:5; [M+H]+ C45H80NO7P---PE 40:6e; PE 18:2e/22:4; [M+H]+ C45H80NO7P---PE 40:6e; PE 18:3e/22:3; [M+H]+ C45H80NO7P---PE 40:6e; PE 18:4e/22:2; [M+H]+ C45H80NO7P---PE 40:6e; PE 18:5e/22:1; [M+H]+ C45H80NO7P	M+H 1+	778.572	787.8		505.9		603.4	362.3				354.7	4.38		4.41		4.39	4.39				4.39	0.58		0.72		0.67	0.53				0.59
521		TAG 45:2; TAG 13:1-16:0-16:1; [M+NH4]+ C48H88O6---TAG 45:2; TAG 14:0-15:1-16:1; [M+NH4]+ C48H88O6---TAG 45:2; TAG 14:1-15:0-16:1; [M+NH4]+ C48H88O6	M+NH4 1+	778.69	682			201.9	276.8	149.6	203.1	282.5	184	318.4	6.04			6.02	6.04	6.04	6.04	6.02	6.03	6.02	0.71			0.67	0.79	0.68	0.72	0.72	0.77	0.75
522		PC 34:2; [M+Na]+; GPCho(16:0/18:2(2E,4E)) C42H80NO8P---PC 34:2; [M+Na]+; GPCho(16:0/18:2(6Z,9Z)) C42H80NO8P---PC 34:2; [M+Na]+; GPCho(16:0/18:2(9E,10E)) C42H80NO8P---PC 34:2; [M+Na]+; GPCho(16:0/18:2(9E,12E)) C42H80NO8P---PC 34:2; [M+Na]+; GPCho(16:0/18:2(9Z,11Z)) C42H80NO8P---PC 34:2; [M+Na]+; GPCho(16:0/18:2(9Z,12Z)) C42H80NO8P---PC 34:2; [M+Na]+; GPCho(17:1(9Z)/17:1(9Z)) C42H80NO8P---PC 34:2; …	M+Na 1+	780.552	4392	5287.7	4433.6				4165.6	4820.2		4026.1	3.84	3.85	3.85				3.83	3.83		3.84	0.86	0.87	0.86				0.87	0.87		0.86
523		PE 39:5; PE 19:1-20:4; [M+H]+ C44H78NO8P	M+H 1+	780.555									573.2										4.12										0.86
524		1-Palmitoyl-2-linoleoyl-sn-glycero-3-phosphocholine [M+H]+ C42H80NO8P NIST 1150348---1-Palmitoyl-2-linoleoyl-sn-glycero-3-phosphocholine [M+H]+ C42H80NO8P NIST 1150349---1-Palmitoyl-2-linoleoyl-sn-glycero-3-phosphocholine [M+H]+ C42H80NO8P NIST 1150350---1-Palmitoyl-2-linoleoyl-sn-glycero-3-phosphocholine [M+H]+ C42H80NO8P NIST 1150351	M+Na 1+	780.554	11546.2	8177.6	15373	12497.6	18246.7	13782.6	11081.3	2410.4	42695.1	11742.3	3.58	3.59	3.56	3.59	3.59	3.55	3.56	3.45	3.55	3.57	0.97	0.95	0.95	0.97	0.98	0.96	0.96	0.93	0.96	0.97
525		PE 40:5e; PE 18:0e/22:5; [M+H]+ C45H82NO7P---PE 40:5e; PE 18:1e/22:4; [M+H]+ C45H82NO7P---PE 40:5e; PE 18:2e/22:3; [M+H]+ C45H82NO7P---PE 40:5e; PE 18:3e/22:2; [M+H]+ C45H82NO7P---PE 40:5e; PE 18:4e/22:1; [M+H]+ C45H82NO7P---PE 40:5e; PE 18:5e/22:0; [M+H]+ C45H82NO7P---plasmenyl-PE 40:4; [M+H]+; PE(P-18:0/22:4(7Z,10Z,13Z,16Z)) C45H82NO7P	M+H 1+	780.593	1510.1	269.5	1019.8	697.6	1289.8	257.2	358.7	259.3	1410.1	568.9	4.68	4.69	4.69	4.69	4.67	4.87	4.69	4.87	4.69	4.7	0.78	0.73	0.72	0.66	0.69	0.75	0.76	0.7	0.74	0.71
526		PC 35:1; PC 19:0-16:1; [M+H]+ C43H84NO8P	M+Li 1+	780.617	0.6			54.6		27		56.4			3.51			3.47		3.47		3.48			0.81			0.81		0.81		0.8
527		TAG 45:1; TAG 14:0-15:0-16:1; [M+NH4]+ C48H90O6	M+NH4 1+	780.707	1351.6	460.5	313.5	373	519	350.8	459.8	596.9	397	760	6.18	6.2	6.19	6.18	6.18	6.18	6.18	6.19	6.19	6.19	0.79	0.8	0.76	0.72	0.8	0.78	0.8	0.79	0.8	0.8
528		1-Hexadecanoyl-2-(9Z-octadecenoyl)-sn-glycero-3-phosphocholine [M+H]+ C42H82NO8P NIST 1035297---1-Oleoyl-2-palmitoyl-sn-glycero-3-phosphocholine [M+H]+ C42H82NO8P NIST 1150424	M+Na 1+	782.569	27442.8,253329.1	188802.0,12126.0	324037	12236.6,311962.2	348290.2,45677.7	249237	199822.9,14630.7	73559	55209.9,458758.4	23351.5,343966.9	3.51,3.81	3.80,3.57	3.81	3.57,3.80	3.80,3.55	3.8	3.81,3.54	3.81	3.53,3.80	3.55,3.80	0.97,0.97	0.97,0.98	0.97	0.97,0.97	0.97,0.97	0.97	0.97,0.98	0.97	0.97,0.97	0.97,0.97
529		1,2-Dilinoleoyl-sn-glycero-3-phosphocholine [M+H]+ C44H80NO8P NIST 1150180	M+H 1+	782.565		89										3										0.65
530		PE 39:4; [M+H]+; GPEtn(19:0/20:4(5E,8E,11E,14E)) C44H80NO8P---PE 39:4; [M+H]+; GPEtn(19:0/20:4(5Z,8Z,11Z,14Z)) C44H80NO8P---PE 39:4; [M+H]+; GPEtn(19:0/20:4(7E,10E,13E,16E)) C44H80NO8P---PE 39:4; [M+H]+; GPEtn(20:4(5E,8E,11E,14E)/19:0) C44H80NO8P---PE 39:4; [M+H]+; GPEtn(20:4(5Z,8Z,11Z,14Z)/19:0) C44H80NO8P---PE 39:4; [M+H]+; GPEtn(20:4(7E,10E,13E,16E)/19:0) C44H80NO8P	M+H 1+	782.57			5868.5		3381.6			686.5	3639.1				4.38		4.41			4.46	4.41				0.9		0.89			0.88	0.9
531		PC 34:1; [M+Na]+; GPCho(10:0/24:1(15Z)) C42H82NO8P---PC 34:1; [M+Na]+; GPCho(16:0/18:1(11E)) C42H82NO8P---PC 34:1; [M+Na]+; GPCho(16:0/18:1(11Z)) C42H82NO8P---PC 34:1; [M+Na]+; GPCho(16:0/18:1(13Z)) C42H82NO8P---PC 34:1; [M+Na]+; GPCho(16:0/18:1(17Z)) C42H82NO8P---PC 34:1; [M+Na]+; GPCho(16:0/18:1(4E)) C42H82NO8P---PC 34:1; [M+Na]+; GPCho(16:0/18:1(6Z)) C42H82NO8P---PC 34:1; [M+Na]+; GPCho(16:0/1…	M+Na 1+	782.57		6623.2				6041	6662.6	3320.4				4.08				4.09	4.09	4.06				0.84				0.83	0.85	0.82
532		TAG 45:0; TAG 14:0-15:0-16:0; [M+NH4]+ C48H92O6	M+NH4 1+	782.722		669.7			503.4	576.4	769.7	858.5	604			6.34			6.33	6.35	6.35	6.33	6.34			0.94			0.95	0.94	0.93	0.95	0.94
533		TAG 45:0; TAG 13:0-15:0-17:0; [M+NH4]+ C48H92O6	M+NH4 1+	782.721	118.4										5.85										0.54
534		Eicosapentaenoyl PAF C-16 [M+H]+ C44H80NO7P NIST 1204801	M+NH4 1+	783.612								58										5.1										0.74
535		TAG 45:2; TAG 13:0-16:1-16:1; [M+Na]+ C48H88O6	M+Na 1+	783.647	160.1										6.02										0.71
536	*	1-Hexadecanoyl-2-(5Z,8Z,11Z,14Z-eicosatetraenoyl)-sn-glycero-3-phosphoserine [M+H]+ C42H74NO10P NIST 1148675	M+H 1+	784.513	325.5		489.9	423.3	500.4	550.8	326.6		765.2	324	3.49		3.5	3.49	3.48	3.51	3.52		3.51	3.5	0.94		0.93	0.89	0.92	0.97	0.94		0.96	0.91
536	*	ISF of 1-Hexadecanoyl-2-(5Z,8Z,11Z,14Z-eicosatetraenoyl)-sn-glycero-3-phosphoserine [M+H]+ C42H74NO10P NIST 1148675	-	599.502			372.2						671.2	315.5			3.48						3.53	3.53			0.96						0.97	0.97
537		PC 36:3; PC 16:0-20:3; [M+H]+ C44H82NO8P---PC 36:3; PC 18:1-18:2; [M+H]+ C44H82NO8P	M+H 1+	784.585	176907	134808	244400	255210	268655	232790	172861	79124.2	538692	259509	3.91	3.9	3.89	3.92	3.92	3.88	3.89	3.89	3.9	3.9	0.91	0.91	0.91	0.92	0.91	0.92	0.92	0.91	0.91	0.91
538		HexCer-NS d40:1; HexCer-NS d18:1/22:0; [M+H]+ C46H89NO8	M+H 1+	784.665	579	486.2	989	1299.3	1289.6	266.4	198.3	232	648.8	663.4	4.85	4.85	4.86	4.87	4.85	4.87	4.86	4.85	4.87	4.85	0.62	0.58	0.67	0.64	0.66	0.56	0.54	0.56	0.66	0.58
539		SM d40:2; SM d14:0/26:2; [M+H]+ C45H89N2O6P---SM d40:2; SM d14:1/26:1; [M+H]+ C45H89N2O6P---SM d40:2; SM d14:2/26:0; [M+H]+ C45H89N2O6P---SM d40:2; SM d15:1/25:1; [M+H]+ C45H89N2O6P---SM d40:2; SM d15:2/25:0; [M+H]+ C45H89N2O6P---SM d40:2; SM d16:0/24:2; [M+H]+ C45H89N2O6P---SM d40:2; SM d16:1/24:1; [M+H]+ C45H89N2O6P---SM d40:2; SM d16:2/24:0; [M+H]+ C45H89N2O6P---SM d40:2; SM d17:1/23:1; [M+H]+…	M+H 1+	785.653	4240.5	2986.8	3901	5248.7	7080.9	1823.3	1468.4		6517.3	4874.5	4.4	4.39	4.38	4.39	4.39	4.37	4.39		4.39	4.39	0.96	0.97	0.97	0.97	0.98	0.97	0.97		0.96	0.97
540		TAG 47:4; TAG 15:0-15:1-17:3; [M+NH4]+ C50H88O6	M+H 1+	785.663							114.6										6.18										0.64
541		GlcADG 34:2; GlcADG 16:0-18:2; [M+NH4]+ C43H76O11	M+NH4 1+	786.564										232.9										3.53										0.73
542		1,2-Di-(9Z-octadecenoyl)-sn-glycero-3-phosphocholine [M+H]+ C44H84NO8P NIST 1035223---1-Stearoyl-2-linoleoyl-sn-glycero-3-phosphocholine [M+H]+ C44H84NO8P NIST 1150385	M+H 1+	786.602	304374	198720	340124	58.4,345512.4	461341	163403	132381	105354	428479	274656	4.17	4.18	4.18	9.82,4.17	4.18	4.17	4.18	4.16	4.16	4.18	0.98	0.98	0.98	0.98,0.98	0.98	0.98	0.98	0.98	0.98	0.98
543		1-Octadecanoyl-2-octadecenoyl-sn-glycero-3-phosphocholine [M+H]+ C44H86NO8P NIST 1035317	M 1+	787.619					162.4										6.1										0.88
544		N-Docosanoyl-4-sphingenyl-1-O-phosphorylcholine [M+H]+ C45H91N2O6P NIST 1035528	M+H 1+	787.67	26724.3	17928.3	20179	26896.1	57971.7	5380.5	3655.3	3981.9	19179.7	20128.4	4.69	4.68	4.7	4.68	4.68	4.68	4.7	4.69	4.7	4.68	0.98	0.98	0.98	0.98	0.98	0.98	0.98	0.98	0.98	0.98
545	*	1-Stearoyl-2-linoleoyl-sn-glycero-3-phospho-L-serine [M+H]+ C42H78NO10P NIST 1197091	M+H 1+	788.54								703.4										3.89										0.79
545	*	ISF of 1-Stearoyl-2-linoleoyl-sn-glycero-3-phospho-L-serine [M+H]+ C42H78NO10P NIST 1197091	-	788.526							1636.8										3.83										0.5
546		Eicosapentaenoyl PAF C-16 [M+H]+ C44H80NO7P NIST 1204801	M+Na 1+	788.546						104.2										2.79										0.85
547		1-Octadecanoyl-2-octadecenoyl-sn-glycero-3-phosphocholine [M+H]+ C44H86NO8P NIST 1035317	M+H 1+	788.617	28489.3	16308.1	32356.9	51297.7	36721.4	9676.4	8956.8	19800.6	34167.9	22577	4.42	4.41	4.41	4.41	4.41	4.41	4.41	4.41	4.41	4.41	0.95	0.93	0.93	0.94	0.95	0.94	0.93	0.94	0.93	0.95
548		TAG 46:4; TAG 12:1-16:1-18:2; [M+NH4]+ C49H86O6---TAG 46:4; TAG 12:2-16:0-18:2; [M+NH4]+ C49H86O6	M+NH4 1+	788.676	417.8			125.3							5.79			5.83							0.64			0.61
549		PE 38:4; [M+Na]+; GPEtn(14:0/24:4(5Z,8Z,11Z,14Z)) C43H78NO8P---PE 38:4; [M+Na]+; GPEtn(18:0/20:4(5E,8E,11E,14E)) C43H78NO8P---PE 38:4; [M+Na]+; GPEtn(18:0/20:4(5Z,8Z,11Z,14Z)) C43H78NO8P---PE 38:4; [M+Na]+; GPEtn(18:0/20:4(7E,10E,13E,16E)) C43H78NO8P---PE 38:4; [M+Na]+; GPEtn(20:4(5E,8E,11E,14E)/18:0) C43H78NO8P---PE 38:4; [M+Na]+; GPEtn(20:4(5Z,8Z,11Z,14Z)/18:0) C43H78NO8P---PE 38:4; [M+Na]+; GP…	M+Na 1+	790.537	2162.7	2104.8	2063.3	2119.9	1944.2	1816.4	1556.8	747.3	2042.6	2069.9	4.27	4.27	4.26	4.26	4.27	4.27	4.26	4.27	4.26	4.26	0.78	0.79	0.79	0.81	0.76	0.8	0.82	0.71	0.77	0.78
550		PE 40:7; [M+H]+; GPEtn(18:1(11E)/22:6(4Z,7Z,10Z,13Z,16Z,19Z)) C45H76NO8P---PE 40:7; [M+H]+; GPEtn(18:1(11Z)/22:6(4Z,7Z,10Z,13Z,16Z,19Z)) C45H76NO8P---PE 40:7; [M+H]+; GPEtn(18:1(13Z)/22:6(4Z,7Z,10Z,13Z,16Z,19Z)) C45H76NO8P---PE 40:7; [M+H]+; GPEtn(18:1(17Z)/22:6(4Z,7Z,10Z,13Z,16Z,19Z)) C45H76NO8P---PE 40:7; [M+H]+; GPEtn(18:1(4E)/22:6(4Z,7Z,10Z,13Z,16Z,19Z)) C45H76NO8P---PE 40:7; [M+H]+; GPEtn(18…	M+H 1+	790.539	14250.5	7873.4	10011.5	9557.2	14559.6	12846.5	8984.2		26323.6	9639.4	3.91	3.9	3.89	3.9	3.9	3.9	3.89		3.9	3.9	0.97	0.97	0.97	0.97	0.97	0.97	0.97		0.97	0.97
551		1,2-Distearoyl-sn-glycero-3-phosphocholine [M+H]+ C44H88NO8P NIST 1197156	M+H 1+	790.635	187.8			428.1		165.8		243.3			4.7			4.66		4.68		4.69			0.76			0.8		0.81		0.82
552		TAG 46:3; TAG 12:0-16:1-18:2; [M+NH4]+ C49H88O6---TAG 46:3; TAG 12:1-16:0-18:2; [M+NH4]+ C49H88O6---TAG 46:3; TAG 12:1-16:1-18:1; [M+NH4]+ C49H88O6---TAG 46:3; TAG 14:1-16:1-16:1; [M+NH4]+ C49H88O6	M+NH4 1+	790.692	1768.1	158.5	156.9	645.7	302.6	105.1	215.4	730.2	176.3	405.9	5.97	5.99	5.99	5.98	5.99	6	5.96	5.96	5.99	5.98	0.64	0.74	0.75	0.68	0.71	0.76	0.7	0.72	0.72	0.67
553		PE 40:6; [M+H]+; GPEtn(18:0/22:6(4Z,7Z,10Z,13Z,16Z,19Z)) C45H78NO8P---PE 40:6; [M+H]+; GPEtn(22:6(4Z,7Z,10Z,13Z,16Z,19Z)/18:0) C45H78NO8P	M+H 1+	792.554	24213.1	16000	13869.9	20228.1	28549.8	6210.3	5855.9	38149.9	15287.3	13326.2	4.19	4.18	4.2	4.19	4.18	4.19	4.2	4.18	4.18	4.18	0.97	0.97	0.98	0.97	0.98	0.98	0.98	0.98	0.97	0.97
554		1-Octadecanoyl-2-(5Z,8Z,11Z,14Z-eicosatetraenoyl)-sn-glycero-3-phosphocholine [M+H]+ C46H84NO8P NIST 1220510	M-H2O+H 1+	792.588			375.9										3.95										0.51
555		TAG 46:2; TAG 12:0-16:0-18:2; [M+NH4]+ C49H90O6---TAG 46:2; TAG 14:0-16:1-16:1; [M+NH4]+ C49H90O6---TAG 46:2; TAG 14:1-16:0-16:1; [M+NH4]+ C49H90O6	M+NH4 1+	792.707	6840.4	709.6	854	4700.4	1333.2	444.9	821.4	3008.6	588.1	1787	6.12	6.13	6.13	6.12	6.14	6.14	6.14	6.12	6.13	6.13	0.74	0.75	0.71	0.75	0.7	0.7	0.69	0.66	0.71	0.74
556		PE 40:5; [M+H]+; GPEtn(18:0/22:5(4Z,7Z,10Z,13Z,16Z)) C45H80NO8P---PE 40:5; [M+H]+; GPEtn(18:0/22:5(7Z,10Z,13Z,16Z,19Z)) C45H80NO8P---PE 40:5; [M+H]+; GPEtn(20:1(11E)/20:4(5E,8E,11E,14E)) C45H80NO8P---PE 40:5; [M+H]+; GPEtn(20:1(11E)/20:4(5Z,8Z,11Z,14Z)) C45H80NO8P---PE 40:5; [M+H]+; GPEtn(20:1(11E)/20:4(7E,10E,13E,16E)) C45H80NO8P---PE 40:5; [M+H]+; GPEtn(20:1(11Z)/20:4(5E,8E,11E,14E)) C45H80NO8P…	M+H 1+	794.567	5952.5					2644.1		10464.3			4.25					4.27		4.41			0.93					0.9		0.98
557		PC 37:5; PC 17:1-20:4; [M+H]+ C45H80NO8P	M+H 1+	794.569						1848.2	1298.5		4378.8	1574.8						3.7	3.71		3.7	3.72						0.9	0.89		0.9	0.88
558		1-(1Z-Octadecenyl)-2-(5Z,8Z,11Z,14Z-eicosatetraenoyl)-sn-glycero-3-phosphocholine [M+H]+ C46H84NO7P NIST 1197292	M+H 1+	794.605	1363.4	977.9	1934.3	1600.9	1576.3	2146.4			4528.4	1741.9	4.07	4.06	4.06	4.07	4.06	4.07			4.06	4.06	0.89	0.9	0.94	0.92	0.91	0.91			0.94	0.91
558		PG 36:1; PG 18:0-18:1; [M+NH4]+ C42H81O10P	M+NH4 1+	794.596								499.4										4.04										0.59
559		TAG 46:1; TAG 14:0-16:0-16:1; [M+NH4]+ C49H92O6	M+NH4 1+	794.723	9609.9	137.3,1576.7	1943.4	9087.9	2314.6	992.1,170.5	1535.7	5881.5	1270.8	3047.6	6.28	9.48,6.28	6.3	6.29	6.29	6.28,9.40	6.29	6.29	6.3	6.29	0.88	0.85,0.89	0.9	0.91	0.9	0.84,0.85	0.87	0.91	0.87	0.9
560		TAG 46:3; TAG 12:1-16:0-18:2; [M+Na]+ C49H88O6---TAG 46:3; TAG 14:0-14:1-18:2; [M+Na]+ C49H88O6	M+Na 1+	795.647	381.3							177.2			5.97							5.96			0.59							0.58
561		PC 37:4; PC 17:0-20:4; [M+H]+ C45H82NO8P---PC 37:4; PC 19:1-18:3; [M+H]+ C45H82NO8P	M+H 1+	796.586	7101	3803.1	6299.6		10392.7	6117	3934.6	1587.1	15201.6	7343.9	3.97	3.96	3.97		3.96	3.96	3.95	3.98	3.96	3.96	0.9	0.9	0.9		0.9	0.91	0.9	0.9	0.93	0.9
562		PE 40:4; [M+H]+; GPEtn(20:0/20:4(5E,8E,11E,14E)) C45H82NO8P---PE 40:4; [M+H]+; GPEtn(20:0/20:4(5Z,8Z,11Z,14Z)) C45H82NO8P---PE 40:4; [M+H]+; GPEtn(20:0/20:4(7E,10E,13E,16E)) C45H82NO8P---PE 40:4; [M+H]+; GPEtn(20:4(5E,8E,11E,14E)/20:0) C45H82NO8P---PE 40:4; [M+H]+; GPEtn(20:4(5Z,8Z,11Z,14Z)/20:0) C45H82NO8P---PE 40:4; [M+H]+; GPEtn(20:4(7E,10E,13E,16E)/20:0) C45H82NO8P	M+H 1+	796.586	2266.3										4.54										0.92
563		HexCer-NS d41:2; HexCer-NS d18:1/23:1; [M+H]+ C47H89NO8	M+H 1+	796.666								148.7										4.92										0.56
564		TAG 46:0; TAG 14:0-16:0-16:0; [M+NH4]+ C49H94O6	M+NH4 1+	796.738	9864.2	1527.3	1315.3	2843.1	1552.8	1328.2	1854	5033.9	1502.5	2184.1	6.45	6.44	6.44	6.45	6.45	6.45	6.45	6.44	6.44	6.44	0.95	0.92	0.93	0.95	0.93	0.91	0.91	0.94	0.91	0.92
565		TAG 46:2; TAG 14:0-16:1-16:1; [M+Na]+ C49H90O6---TAG 46:2; TAG 14:1-16:0-16:1; [M+Na]+ C49H90O6	M+Na 1+	797.662				502.6						231.6				6.12						6.13				0.69						0.74
565		TAG 48:5; TAG 12:0-16:0-20:5; [M+NH4]+ C51H88O6---TAG 48:5; TAG 14:0-16:1-18:4; [M+NH4]+ C51H88O6---TAG 48:5; TAG 14:0-16:3-18:2; [M+NH4]+ C51H88O6---TAG 48:5; TAG 16:1-16:1-16:3; [M+NH4]+ C51H88O6	M+H 1+	797.663	648.4				186.7	116.5	179.1	527			6.12				6.12	6.14	6.12	6.12			0.59				0.58	0.82	0.79	0.61
566		plasmenyl-PE 40:6; [M+Na]+; PE(P-18:0/22:6(4Z,7Z,10Z,13Z,16Z,19Z)) C45H78NO7P	M+Na 1+	798.541								200.9										4.37										0.62
567		Docosahexaenoyl PAF C-16 [M+H]+ C46H82NO7P NIST 1204787	M+Li 1+	798.597			2646.8		4318.2				7740.1				4.02		4.06				4.04				0.69		0.74				0.76
568		HexCer-NS d41:1; HexCer-NS d18:1/23:0; [M+H]+ C47H91NO8	M+H 1+	798.681	144.8	153.6	287	240.5	283	99.4	66.2	109.9	285	170.4	5	5.02	5.01	5	5	5.01	5.01	5	5.01	5.02	0.56	0.51	0.53	0.51	0.53	0.56	0.55	0.55	0.65	0.56
569		1,2-Dilinoleoyl-sn-glycero-3-phosphocholine [M+H]+ C44H80NO8P NIST 1150182---1,2-Dilinoleoyl-sn-glycero-3-phosphocholine [M+H]+ C44H80NO8P NIST 1150183	M+NH4 1+	799.601				959.7		1024.5								4.09		4.04								0.57		0.57
570		SM 40:4; [M]+; SM(d16:0/24:4(5Z,8Z,11Z,14Z)) C45H86N2O6P	M+NH4 1+	799.668								510.1										4.56										0.68
570		SM d41:2; SM d14:1/27:1; [M+H]+ C46H91N2O6P---SM d41:2; SM d14:2/27:0; [M+H]+ C46H91N2O6P---SM d41:2; SM d15:0/26:2; [M+H]+ C46H91N2O6P---SM d41:2; SM d15:1/26:1; [M+H]+ C46H91N2O6P---SM d41:2; SM d15:2/26:0; [M+H]+ C46H91N2O6P---SM d41:2; SM d16:1/25:1; [M+H]+ C46H91N2O6P---SM d41:2; SM d16:2/25:0; [M+H]+ C46H91N2O6P---SM d41:2; SM d17:0/24:2; [M+H]+ C46H91N2O6P---SM d41:2; SM d17:1/24:1; [M+H]+…	M+H 1+	799.668	1275.3	865.5	1345.9	1321.7		809.7	589.9		2470.4	1026.4	4.54	4.54	4.55	4.56		4.54	4.53		4.53	4.54	0.97	0.97	0.98	0.97		0.98	0.96		0.97	0.97
571		TAG 48:4; TAG 16:0-16:1-16:3; [M+NH4]+ C51H90O6	M+H 1+	799.677							207.6										6.29										0.71
571		TG 46:1; [M+Na]+; TG(14:0/16:0/16:1) C49H92O6	M+Na 1+	799.679			174.4			140.4		505.8					6.27			6.28		6.29					0.75			0.66		0.78
572		1-(1Z-Octadecenyl)-2-(4Z,7Z,10Z,13Z,16Z,19Z-docosahexaenoyl)-sn-glycero-3-phosphocholine [M+H]+ C48H84NO7P NIST 1197303	M-H2O+H 1+	800.585							227.4										2.92										0.54
573		1-(1Z-Octadecenyl)-2-(5Z,8Z,11Z,14Z-eicosatetraenoyl)-sn-glycero-3-phosphocholine [M+H]+ C46H84NO7P NIST 1197293	M+Li 1+	800.618	6171.4	3874.2		4255.2	9884.4	3968.9	2780.1		11120.8	5311.4	4.33	4.35		4.35	4.35	4.33	4.35		4.32	4.33	0.94	0.67		0.6	0.82	0.94	0.93		0.94	0.94
573		PC 37:2; PC 19:0-18:2; [M+H]+ C45H86NO8P	M+H 1+	800.618			5140.7					2888.4					4.34					4.35					0.77					0.57
574		SM d41:1; SM d14:0/27:1; [M+H]+ C46H93N2O6P---SM d41:1; SM d14:1/27:0; [M+H]+ C46H93N2O6P---SM d41:1; SM d15:0/26:1; [M+H]+ C46H93N2O6P---SM d41:1; SM d15:1/26:0; [M+H]+ C46H93N2O6P---SM d41:1; SM d16:0/25:1; [M+H]+ C46H93N2O6P---SM d41:1; SM d16:1/25:0; [M+H]+ C46H93N2O6P---SM d41:1; SM d17:0/24:1; [M+H]+ C46H93N2O6P---SM d41:1; SM d17:1/24:0; [M+H]+ C46H93N2O6P---SM d41:1; SM d18:0/23:1; [M+H]+…	M+H 1+	801.685	3946.7	3413.7	4050	4477.1	8292.7	2139.7	1509.6	1883.3	6771.4	3540.6	4.85	4.85	4.84	4.85	4.85	4.85	4.84	4.85	4.85	4.85	0.97	0.97	0.97	0.96	0.97	0.97	0.96	0.97	0.97	0.97
575		TAG 46:0; TAG 15:0-15:0-16:0; [M+Na]+ C49H94O6	M+Na 1+	801.693							160.6										6.43										0.55
575		TAG 48:3; TAG 14:0-16:0-18:3; [M+NH4]+ C51H92O6	M+H 1+	801.695		81						282.8				6.44						6.44				0.75						0.79
576		PC 36:5; [M+Na]+; GPCho(14:0/22:5(4Z,7Z,10Z,13Z,16Z)) C44H78NO8P---PC 36:5; [M+Na]+; GPCho(14:0/22:5(7Z,10Z,13Z,16Z,19Z)) C44H78NO8P---PC 36:5; [M+Na]+; GPCho(16:1(7Z)/20:4(5E,8E,11E,14E)) C44H78NO8P---PC 36:5; [M+Na]+; GPCho(16:1(7Z)/20:4(5Z,8Z,11Z,14Z)) C44H78NO8P---PC 36:5; [M+Na]+; GPCho(16:1(7Z)/20:4(7E,10E,13E,16E)) C44H78NO8P---PC 36:5; [M+Na]+; GPCho(16:1(9Z)/20:4(5E,8E,11E,14E)) C44H78NO…	M+Na 1+	802.537	721.3	515.6	925.4	827	1178.7	889.7	737	221	2203.6		3.58	3.59	3.56	3.59	3.59	3.55	3.56	3.52	3.55		0.76	0.79	0.71	0.82	0.71	0.85	0.85	0.5	0.85
577		TAG 47:4; TAG 14:0-15:2-18:2; [M+NH4]+ C50H88O6	M+NH4 1+	802.69	134.7										5.91										0.73
578		1,2-Dilinoleoyl-sn-glycero-3-phosphocholine [M+H]+ C44H80NO8P NIST 1150182---PC 36:4; [M+Na]+; GPCho(18:2(2E,4E)/18:2(2E,4E)) C44H80NO8P---PC 36:4; [M+Na]+; GPCho(18:2(2E,4E)/18:2(6Z,9Z)) C44H80NO8P---PC 36:4; [M+Na]+; GPCho(18:2(2E,4E)/18:2(9E,10E)) C44H80NO8P---PC 36:4; [M+Na]+; GPCho(18:2(2E,4E)/18:2(9E,12E)) C44H80NO8P---PC 36:4; [M+Na]+; GPCho(18:2(2E,4E)/18:2(9Z,11Z)) C44H80NO8P---PC 36:4; …	M+Na 1+	804.552	7850.6	2495.5,3119.6	9358.4	6728	9111.7	8982.6	7497.2	4871	7108.8	7893.1	3.62	3.80,3.51	3.6	3.66	3.59	3.62	3.63	3.69	3.67	3.65	0.86	0.89,0.90	0.88	0.84	0.87	0.93	0.88	0.87	0.89	0.88
579		1,2-Dilinoleoyl-sn-glycero-3-phosphocholine [M+H]+ C44H80NO8P NIST 1150183	M+Na 1+	804.555									11647										3.47										0.93
580		PE 42:7e; PE 20:3e/22:4; [M+H]+ C47H82NO7P---PE 42:7e; PE 20:4e/22:3; [M+H]+ C47H82NO7P---PE 42:7e; PE 20:5e/22:2; [M+H]+ C47H82NO7P---plasmenyl-PE 42:6; [M+H]+; PE(P-20:0/22:6(4Z,7Z,10Z,13Z,16Z,19Z)) C47H82NO7P	M+H 1+	804.59	258.1	157.4			375.4	104.5	55.5	129.7	292.6	201.9	4.69	4.68			4.71	4.7	4.7	4.71	4.7	4.68	0.71	0.77			0.76	0.71	0.62	0.62	0.67	0.79
581		TAG 47:3; TAG 13:0-16:1-18:2; [M+NH4]+ C50H90O6---TAG 47:3; TAG 14:1-16:1-17:1; [M+NH4]+ C50H90O6---TAG 47:3; TAG 15:1-16:1-16:1; [M+NH4]+ C50H90O6	M+NH4 1+	804.707	563.4			239.6			145.5	210.7	117.8	229.3	6.08			6.08			6.1	6.06	6.09	6.08	0.65			0.64			0.68	0.65	0.73	0.68
582		Arachidonoylthio-PC [M+H]+ C44H82NO6PS NIST 1105298	M+Na 1+	806.552										71.3										2.1										0.68
583		PE 41:6; [M+H]+; GPEtn(19:0/22:6(4Z,7Z,10Z,13Z,16Z,19Z)) C46H80NO8P---PE 41:6; [M+H]+; GPEtn(22:6(4Z,7Z,10Z,13Z,16Z,19Z)/19:0) C46H80NO8P	M+H 1+	806.57								999.7										4.37										0.94
584		1-Palmitoyl-2-docosahexaenoyl-sn-glycero-3-phosphocholine [M+H]+ C46H80NO8P NIST 1197231	M+H 1+	806.572	275987	191513	265338	263448	352806	191800	149067	150326	365666	282608	3.74	3.74	3.73	3.74	3.74	3.74	3.73	3.73	3.74	3.74	0.99	0.98	0.99	0.99	0.98	0.98	0.98	0.98	0.98	0.99
585		PE 42:6e; PE 18:2e/24:4; [M+H]+ C47H84NO7P---PE 42:6e; PE 18:4e/24:2; [M+H]+ C47H84NO7P---PE 42:6e; PE 18:5e/24:1; [M+H]+ C47H84NO7P---PE 42:6e; PE 20:3e/22:3; [M+H]+ C47H84NO7P---PE 42:6e; PE 20:4e/22:2; [M+H]+ C47H84NO7P---PE 42:6e; PE 20:5e/22:1; [M+H]+ C47H84NO7P	M+H 1+	806.606						48.9	47.6									4.78	4.76									0.57	0.56
586		TAG 47:2; TAG 14:0-16:1-17:1; [M+NH4]+ C50H92O6---TAG 47:2; TAG 15:0-16:1-16:1; [M+NH4]+ C50H92O6---TAG 47:2; TAG 15:1-16:0-16:1; [M+NH4]+ C50H92O6	M+NH4 1+	806.723	2051.6	566.8	314.7,454.6	999.9	728.9	388.3	549.5	855		904.9	6.22	6.24	7.28,6.23	6.22	6.22	6.24	6.23	6.23		6.23	0.65	0.69	0.66,0.72	0.7	0.67	0.7	0.72	0.68		0.7
587		SM 40:2; [M+Na]+; SM(d14:1(4E)/26:1(17Z)) C45H90N2O6P---SM 40:2; [M+Na]+; SM(d16:1(4E)/24:1(15Z)) C45H90N2O6P	M+Na 1+	807.634	338.7	327.9	397.8			212.8	157.9		612.1	478.7	4.4	4.39	4.38			4.37	4.39		4.39	4.39	0.66	0.68	0.75			0.73	0.71		0.74	0.79
588		PS 38:6; PS 16:0-22:6; [M+H]+ C44H74NO10P	M+H 1+	808.513	339.8						332.5			306.8	3.43						3.46			3.44	0.94						0.94			0.91
589		1-Stearoyl-2-linoleoyl-sn-glycero-3-phosphocholine [M+H]+ C44H84NO8P NIST 1150386	M+Na 1+	808.583	102741	71708.3	108419	107098	127608	129304	101533	51238	255199	115958	3.83	3.82	3.81	3.82	3.82	3.84	3.85	3.81	3.84	3.82	0.98	0.98	0.98	0.98	0.98	0.98	0.98	0.98	0.98	0.98
590		PC 36:2; [M+Na]+; GPCho(18:0/18:2(2E,4E)) C44H84NO8P---PC 36:2; [M+Na]+; GPCho(18:0/18:2(6Z,9Z)) C44H84NO8P---PC 36:2; [M+Na]+; GPCho(18:0/18:2(9E,10E)) C44H84NO8P---PC 36:2; [M+Na]+; GPCho(18:0/18:2(9E,12E)) C44H84NO8P---PC 36:2; [M+Na]+; GPCho(18:0/18:2(9Z,11Z)) C44H84NO8P---PC 36:2; [M+Na]+; GPCho(18:0/18:2(9Z,12Z)) C44H84NO8P---PC 36:2; [M+Na]+; GPCho(18:1(11E)/18:1(11E)) C44H84NO8P---PC 36:2…	M+Na 1+	808.583	5740.3	5619.1	6358.4	5933.1	5505.6	6429.8	5631.5	4220.3		6017.7	4.19	4.18	4.18	4.19	4.18	4.17	4.18	4.16		4.18	0.87	0.87	0.87	0.88	0.87	0.88	0.87	0.87		0.86
591		HexCer-NS d42:3; HexCer-NS d18:1/24:2; [M+H]+ C48H89NO8	M+H 1+	808.662									341.5										4.83										0.5
592		TAG 47:1; TAG 13:0-15:0-19:1; [M+NH4]+ C50H94O6---TAG 47:1; TAG 13:0-16:1-18:0; [M+NH4]+ C50H94O6---TAG 47:1; TAG 13:0-17:0-17:1; [M+NH4]+ C50H94O6	M+NH4 1+	808.735		160.8		69.5				107.3				5.89		5.87				5.88				0.64		0.65				0.5
593		TAG 47:1; TAG 15:0-16:0-16:1; [M+NH4]+ C50H94O6	M+NH4 1+	808.738		940.7	725.3	1126.4	988.1,283.4	753.7	961	1373.8	750.4	1383.5		6.38	6.38	6.37	6.37,8.88	6.39	6.37	6.37	6.38	6.38		0.81	0.8	0.8	0.82,0.83	0.85	0.81	0.8	0.82	0.82
594		N-Docosanoyl-4-sphingenyl-1-O-phosphorylcholine [M+Na]+ C45H91N2O6P NIST 1035538---N-Docosanoyl-4-sphingenyl-1-O-phosphorylcholine [M+Na]+ C45H91N2O6P NIST 1035539	M+Na 1+	809.651	1842	2097.9	1772.9	1630.8	3026.5	766.3	514.3	518.6	2070.4	2147	4.69	4.68	4.7	4.68	4.68	4.68	4.7	4.69	4.7	4.68	0.9	0.9	0.9	0.9	0.89	0.9	0.89	0.89	0.9	0.9
595		1-Octadecanoyl-2-(5Z,8Z,11Z,14Z-eicosatetraenoyl)-sn-glycero-3-phosphocholine [M+H]+ C46H84NO8P NIST 1220509	M+H 1+	810.593	22935.9	10770	23349	23403.3		35663.1	34854.1				3.89	3.86	3.87	3.88		3.88	3.97				0.96	0.96	0.97	0.97		0.97	0.97
596		1-Octadecanoyl-2-(5Z,8Z,11Z,14Z-eicosatetraenoyl)-sn-glycero-3-phosphocholine [M+H]+ C46H84NO8P NIST 1220511	M+H 1+	810.6			23.8	33.2									9.8	9.82									0.63	0.62
597		1-Octadecanoyl-2-(5Z,8Z,11Z,14Z-eicosatetraenoyl)-sn-glycero-3-phosphocholine [M+H]+ C46H84NO8P NIST 1220510	M+H 1+	810.602	189821	104779	210919	234691	22367.4,243918.2	99494.7	77703.7	55692.7	247028	178168.9,22130.5	4.15	4.14	4.16	4.15	3.86,4.14	4.15	4.16	4.16	4.16	4.14,3.88	0.97	0.96	0.97	0.97	0.97,0.97	0.96	0.96	0.96	0.97	0.96,0.97
598		HexCer-NS d42:2; HexCer-NS d18:1/24:1; [M+H]+ C48H91NO8---N-(15Z-Tetracosenoyl)-1-.beta.-galactosyl-sphing-4-enine [M+H]+ C48H91NO8 NIST 1035507---N-(15Z-Tetracosenoyl)-1-.beta.-galactosyl-sphing-4-enine [M+H]+ C48H91NO8 NIST 1035508---N-(15Z-Tetracosenoyl)-1-.beta.-galactosyl-sphing-4-enine [M+H]+ C48H91NO8 NIST 1035509	M+H 1+	810.681	308.5	281.8	659.8	804.9	584.7	235.7	168.4	525	649	425.8	4.85	4.87	4.86	4.87	4.88	4.87	4.86	4.98	4.87	4.85	0.96	0.92	0.95	0.96	0.93	0.94	0.92	0.63	0.95	0.94
599		TAG 47:0; TAG 15:0-16:0-16:0; [M+NH4]+ C50H96O6	M+NH4 1+	810.754	1654.5	930.8	679.5	102.9	663	882.1	1130.6	1342.9	875.4	922.6	6.53	6.53	6.52	6.08	6.53	6.53	6.52	6.52	6.53	6.52	0.9	0.89	0.88	0.57	0.91	0.88	0.88	0.9	0.88	0.86
600		SM d42:3; SM d14:1/28:2; [M+H]+ C47H91N2O6P---SM d42:3; SM d14:2/28:1; [M+H]+ C47H91N2O6P---SM d42:3; SM d14:3/28:0; [M+H]+ C47H91N2O6P---SM d42:3; SM d15:2/27:1; [M+H]+ C47H91N2O6P---SM d42:3; SM d15:3/27:0; [M+H]+ C47H91N2O6P---SM d42:3; SM d16:1/26:2; [M+H]+ C47H91N2O6P---SM d42:3; SM d16:2/26:1; [M+H]+ C47H91N2O6P---SM d42:3; SM d16:3/26:0; [M+H]+ C47H91N2O6P---SM d42:3; SM d17:2/25:1; [M+H]+…	M+H 1+	811.667	3677.9	1887.1	2695.3	2099.9	4358	2322.3	1776.8	2649.7	7950	3248.7	4.44	4.43	4.43	4.43	4.43	4.44	4.43	4.44	4.43	4.43	0.96	0.91	0.97	0.92	0.96	0.95	0.96	0.95	0.96	0.93
601		1-Octadecanoyl-2-(5Z,8Z,11Z,14Z-eicosatetraenoyl)-sn-glycero-3-phosphoserine [M+H]+ C44H78NO10P NIST 1196927	M+H 1+	812.544	59.8,4659.4	3831.4	4741	69.0,4564.3	4092.5	5273.9	2961.9,59.9	1572.3	3771.2	3862.5,55.6	9.75,3.83	3.82	3.81	9.74,3.82	3.82	3.82	3.85,9.73	3.87	3.82	3.84,9.74	0.93,0.97	0.98	0.97	0.95,0.97	0.97	0.98	0.95,0.96	0.96	0.97	0.97,0.99
602		1-Octadecanoyl-2-(5Z,8Z,11Z,14Z-eicosatetraenoyl)-sn-glycero-3-phosphoserine [M+H]+ C44H78NO10P NIST 1196930	M+H 1+	812.545		59.9										9.74										0.98
603		1,2-Distearoyl-sn-glycero-3-phosphocholine [M+H]+ C44H88NO8P NIST 1197157	M+Na 1+	812.614	87747.3	47249.1	87330.5	130404	124441	44060.6		17344.6	111353	89910.9	4.23	4.27	4.24	4.27	4.24	4.21		4.2	4.22	4.24	0.96	0.96	0.97	0.97	0.97	0.93		0.95	0.94	0.97
604	*	HexCer-NS d42:1; HexCer-NS d18:1/24:0; [M+H]+ C48H93NO8	M+H 1+	812.696	217.3	258.3	372.2	359.4	429.9	185.1	107.5	367.1	405.7	279	5.14	5.16	5.16	5.17	5.15	5.16	5.15	5.15	5.16	5.17	0.53	0.56	0.57	0.51	0.53	0.55	0.54	0.55	0.59	0.55
604	*	ISF of HexCer-NS d42:1; HexCer-NS d18:1/24:0; [M+H]+ C48H93NO8	-	794.683								161										5.17										0.84
605		SM d42:2; SM d14:0/28:2; [M+H]+ C47H93N2O6P---SM d42:2; SM d14:1/28:1; [M+H]+ C47H93N2O6P---SM d42:2; SM d14:2/28:0; [M+H]+ C47H93N2O6P---SM d42:2; SM d15:1/27:1; [M+H]+ C47H93N2O6P---SM d42:2; SM d15:2/27:0; [M+H]+ C47H93N2O6P---SM d42:2; SM d16:0/26:2; [M+H]+ C47H93N2O6P---SM d42:2; SM d16:1/26:1; [M+H]+ C47H93N2O6P---SM d42:2; SM d16:2/26:0; [M+H]+ C47H93N2O6P---SM d42:2; SM d17:1/25:1; [M+H]+…	M+H 1+	813.685	26275.8	15922.4	25792	25622.2	40634.1	12556.6	8805.2	7548.6	45023.2	21534.6	4.69	4.68	4.7	4.68	4.68	4.68	4.7	4.69	4.68	4.68	0.98	0.98	0.98	0.98	0.98	0.98	0.98	0.98	0.98	0.98
606		PE 40:6; [M+Na]+; GPEtn(20:3(5Z,8Z,11Z)/20:3(5Z,8Z,11Z)) C45H78NO8P---PE 40:6; [M+Na]+; GPEtn(20:3(5Z,8Z,11Z)/20:3(8Z,11Z,14Z)) C45H78NO8P---PE 40:6; [M+Na]+; GPEtn(20:3(8Z,11Z,14Z)/20:3(5Z,8Z,11Z)) C45H78NO8P---PE 40:6; [M+Na]+; GPEtn(20:3(8Z,11Z,14Z)/20:3(8Z,11Z,14Z)) C45H78NO8P	M+Na 1+	814.539		490.8						1181.5				4.18						4.2				0.56						0.72
607		GlcADG 36:2; GlcADG 18:1-18:1; [M+NH4]+ C45H80O11	M+NH4 1+	814.603	2012.3	2123.9,140.1	2032.4	2150.7,105.3	1914.6	1752.2	1885.4	2049.5		2131.4	3.74	3.76,9.33	3.75	3.76,9.11	3.76	3.74	3.75	3.75		3.76	0.81	0.87,0.91	0.87	0.80,0.89	0.86	0.83	0.92	0.92		0.91
608		PC 38:2; PC 18:0-20:2; [M+H]+ C46H88NO8P---PC 38:2; PC 20:0-18:2; [M+H]+ C46H88NO8P	M+H 1+	814.627		9777.6	12357.2	8296.7	25877.8			3117.3	10473.5	6271.4		4.37	4.34	4.49	4.39			4.37	4.34	4.49		0.9	0.9	0.9	0.91			0.9	0.9	0.9
609		N-Tetracosanoyl-4-sphingenyl-1-O-phosphorylcholine [M+H]+ C47H95N2O6P NIST 1035570---SM d42:1; SM d14:0/28:1; [M+H]+ C47H95N2O6P---SM d42:1; SM d14:1/28:0; [M+H]+ C47H95N2O6P---SM d42:1; SM d15:0/27:1; [M+H]+ C47H95N2O6P---SM d42:1; SM d15:1/27:0; [M+H]+ C47H95N2O6P---SM d42:1; SM d16:0/26:1; [M+H]+ C47H95N2O6P---SM d42:1; SM d16:1/26:0; [M+H]+ C47H95N2O6P---SM d42:1; SM d17:0/25:1; [M+H]+ C47H95…	M+H 1+	815.701	6916.7	7765.8	7320	7092.8	15140	3267.5	2597.4	2340.9	9745.5	6583	5	5	5.01	5	5	5.01	5.01	5	5.01	5	0.98	0.98	0.98	0.98	0.98	0.98	0.98	0.98	0.98	0.98
610		PE 40:5; [M+Na]+; GPEtn(16:1(7Z)/24:4(5Z,8Z,11Z,14Z)) C45H80NO8P---PE 40:5; [M+Na]+; GPEtn(16:1(9Z)/24:4(5Z,8Z,11Z,14Z)) C45H80NO8P---PE 40:5; [M+Na]+; GPEtn(24:4(5Z,8Z,11Z,14Z)/16:1(7Z)) C45H80NO8P---PE 40:5; [M+Na]+; GPEtn(24:4(5Z,8Z,11Z,14Z)/16:1(9Z)) C45H80NO8P	M+Na 1+	816.551								489.2										4.31										0.64
611		PC 38:1; PC 18:0-20:1; [M+H]+ C46H90NO8P---PC 38:1; PC 20:0-18:1; [M+H]+ C46H90NO8P	M+H 1+	816.652			1399					921.5		1019.2			4.72					4.71		4.7			0.88					0.89		0.87
612		TAG 48:4; TAG 14:0-16:1-18:3; [M+NH4]+ C51H90O6---TAG 48:4; TAG 14:1-16:0-18:3; [M+NH4]+ C51H90O6---TAG 48:4; TAG 14:1-16:1-18:2; [M+NH4]+ C51H90O6	M+NH4 1+	816.707	2608.4	148.5	221.4	1712.4	423	115.9	236	897.5	241.7	746.6	5.99	6.05	6.05	6.04	6.04	6.02	6	6	6.01	6.02	0.66	0.71	0.68	0.71	0.65	0.7	0.7	0.67	0.66	0.7
613		PC 37:4; PC 19:1-18:3; [M+H]+ C45H82NO8P	M+Na 1+	818.57	517.9		584.7				469.1				3.66		3.65				3.65				0.72		0.66				0.76
614		PE 40:4; [M+Na]+; GPEtn(20:2(11Z,14Z)/20:2(11Z,14Z)) C45H82NO8P---PE 40:4; [M+Na]+; GPEtn(20:2(11Z,14Z)/20:2(5Z,8Z)) C45H82NO8P---PE 40:4; [M+Na]+; GPEtn(20:2(5Z,8Z)/20:2(11Z,14Z)) C45H82NO8P---PE 40:4; [M+Na]+; GPEtn(20:2(5Z,8Z)/20:2(5Z,8Z)) C45H82NO8P	M+Na 1+	818.569					205.1										4.56										0.57
615		PC 37:4; [M+Na]+; GPCho(13:0/24:4(5Z,8Z,11Z,14Z)) C45H82NO8P---PC 37:4; [M+Na]+; GPCho(24:4(5Z,8Z,11Z,14Z)/13:0) C45H82NO8P	M+Na 1+	818.572			224			164.1							3.95			3.95							0.58			0.64
615		PC 39:7; PC 17:1-22:6; [M+H]+ C47H80NO8P	M+H 1+	818.574									1790.3	261.1									3.63	4.22									0.76	0.56
616		PE 42:7; [M+H]+; GPEtn(20:1(11E)/22:6(4Z,7Z,10Z,13Z,16Z,19Z)) C47H80NO8P---PE 42:7; [M+H]+; GPEtn(20:1(11Z)/22:6(4Z,7Z,10Z,13Z,16Z,19Z)) C47H80NO8P---PE 42:7; [M+H]+; GPEtn(20:1(13E)/22:6(4Z,7Z,10Z,13Z,16Z,19Z)) C47H80NO8P---PE 42:7; [M+H]+; GPEtn(20:1(13Z)/22:6(4Z,7Z,10Z,13Z,16Z,19Z)) C47H80NO8P---PE 42:7; [M+H]+; GPEtn(22:6(4Z,7Z,10Z,13Z,16Z,19Z)/20:1(11E)) C47H80NO8P---PE 42:7; [M+H]+; GPEtn(2…	M+H 1+	818.578	474.1				655.6				943.6		4.23				4.22				4.22		0.88				0.74				0.82
617		1-(1Z-Octadecenyl)-2-(4Z,7Z,10Z,13Z,16Z,19Z-docosahexaenoyl)-sn-glycero-3-phosphocholine [M+H]+ C48H84NO7P NIST 1197302	M+H 1+	818.594		348.1										4.25										0.61
618		TAG 48:3; TAG 14:0-16:1-18:2; [M+NH4]+ C51H92O6---TAG 48:3; TAG 14:1-16:0-18:2; [M+NH4]+ C51H92O6	M+NH4 1+	818.723	16869.1	1049.9	1847.2	17552.7	3413.9	712.4	1514.8	6183.8	1406.4	6396.4	6.16	6.18	6.17	6.14	6.16	6.16	6.16	6.15	6.15	6.15	0.83	0.75	0.77	0.86	0.76	0.85	0.85	0.85	0.84	0.86
619		PC 39:6; PC 17:0-22:6; [M+H]+ C47H82NO8P	M 1+	819.581								405.5										4.06										0.65
620		N-Tetracosenoyl-4-sphingenyl-1-O-phosphorylcholine [M+H]+ C47H93N2O6P NIST 1035605	M+Li 1+	819.693	174.6								330.6	113.8	4.69								4.7	4.68	0.75								0.82	0.78
621		PC 37:3; PC 19:0-18:3; [M+H]+ C45H84NO8P	M+Na 1+	820.585		2464.7										3.9										0.78
621		PC 39:6; PC 17:0-22:6; [M+H]+ C47H82NO8P	M+H 1+	820.585	3584		2752.2	1854.8	5197.3	2358		2627.4	4953.3		3.91		3.89	3.9	3.9	3.9		3.91	3.9		0.88		0.87	0.87	0.87	0.87		0.89	0.88
622		TAG 48:2; TAG 12:0-16:1-20:1; [M+NH4]+ C51H94O6	M+NH4 1+	820.733	3887.2										5.68										0.65
623		TAG 48:2; TAG 14:0-16:0-18:2; [M+NH4]+ C51H94O6---TAG 48:2; TAG 14:0-16:1-18:1; [M+NH4]+ C51H94O6---TAG 48:2; TAG 16:0-16:1-16:1; [M+NH4]+ C51H94O6	M+NH4 1+	820.74	64183.6	8102.8	15628.3	104133	19822.8	2220.4	5215	25083.4	4070.6	24687	6.3	6.3	6.32	6.31	6.31	6.33	6.31	6.31	6.32	6.31	0.86	0.8	0.82	0.86	0.8	0.74	0.76	0.82	0.76	0.82
624		BMP 40:7; BMP 18:1-22:6; [M+NH4]+ C46H77O10P	M+H 1+	821.533						52.9										3.33										0.82
625		TAG 48:4; TAG 12:0-18:2-18:2; [M+Na]+ C51H90O6---TAG 48:4; TAG 14:0-16:2-18:2; [M+Na]+ C51H90O6	M+Na 1+	821.663	497.1							224			5.99							6			0.77							0.68
625		TAG 50:7; TAG 16:0-16:2-18:5; [M+NH4]+ C53H88O6	M+H 1+	821.663					89.7										6.04										0.59
626		TAG 49:3; TAG 15:1-17:0-17:2; [M+NH4]+ C52H94O6	M+Li 1+	821.72							122.1										7.43										0.51
627		PC 39:5; PC 21:2-18:3; [M+H]+ C47H84NO8P	M+H 1+	822.598		895.7	915.1			1175.6		760.5	3004.1			4.02	4.02			4.02		4.06	4			0.68	0.71			0.76		0.76	0.87
628		TAG 48:1; TAG 14:0-16:0-18:1; [M+NH4]+ C51H96O6---TAG 48:1; TAG 16:0-16:0-16:1; [M+NH4]+ C51H96O6	M+NH4 1+	822.755	56506.4	8600.8	15473	65028	17807.7	2440.1	5271.2	29284.7	3886.6	19054	6.45	6.47	6.46	6.45	6.45	6.47	6.47	6.46	6.46	6.46	0.85	0.83	0.83	0.82	0.84	0.83	0.82	0.83	0.85	0.82
629		SM 41:1; [M+Na]+; SM(d15:0/26:1(17Z)) C46H94N2O6P---SM 41:1; [M+Na]+; SM(d15:1(4E)/26:0) C46H94N2O6P---SM 41:1; [M+Na]+; SM(d17:0/24:1(15Z)) C46H94N2O6P---SM 41:1; [M+Na]+; SM(d17:1(4E)/24:0) C46H94N2O6P---SM 41:1; [M+Na]+; SM(d19:1(4E)/22:0) C46H94N2O6P	M+Na 1+	823.666	386.2	418.7		377.3	714.2		182.8	248.7	773.5	411.1	4.85	4.85		4.85	4.85		4.84	4.85	4.85	4.85	0.89	0.88		0.83	0.82		0.88	0.82	0.86	0.86
630		TAG 48:3; TAG 14:0-16:0-18:3; [M+Na]+ C51H92O6---TAG 48:3; TAG 14:0-16:1-18:2; [M+Na]+ C51H92O6---TAG 48:3; TAG 16:0-16:1-16:2; [M+Na]+ C51H92O6	M+Na 1+	823.679	1460.5		337.2	1479.7	460.8			1051.5		701.9	6.16		6.17	6.14	6.16			6.15		6.15	0.72		0.71	0.77	0.71			0.77		0.78
630		TAG 50:6; TAG 16:1-16:1-18:4; [M+NH4]+ C53H90O6	M+H 1+	823.677							324.9		259.6								6.16		6.15								0.65		0.66
631		1-(1Z-Octadecenyl)-2-(4Z,7Z,10Z,13Z,16Z,19Z-docosahexaenoyl)-sn-glycero-3-phosphocholine [M+H]+ C48H84NO7P NIST 1197302---1-(1Z-Octadecenyl)-2-(4Z,7Z,10Z,13Z,16Z,19Z-docosahexaenoyl)-sn-glycero-3-phosphocholine [M+H]+ C48H84NO7P NIST 1197303	M+Li 1+	824.617	3482.2	1877.2	2652.1		5198.1	2158.6			6135.8		4.31	4.31	4.3		4.31	4.29			4.3		0.93	0.87	0.93		0.92	0.87			0.93
631		PC 39:4; PC 19:0-20:4; [M+H]+ C47H86NO8P	M+H 1+	824.616							1323.8			3041.1							4.3			4.31							0.91			0.91
632		TAG 48:0; TAG 14:0-16:0-18:0; [M+NH4]+ C51H98O6	M+NH4 1+	824.771	35011.2	5603.9	5083	24272.2	10121.9	4234.4	5538.8	17694.3	4675.9	6008.5	6.61	6.61	6.6	6.53	6.57	6.61	6.62	6.62	6.61	6.6	0.69	0.7	0.69	0.67	0.68	0.7	0.72	0.7	0.72	0.71
633		TAG 48:2; TAG 14:0-16:0-18:2; [M+Na]+ C51H94O6	M+Na 1+	825.695	2010.6					289.3		1804.5			6.3					6.3		6.31			0.8					0.63		0.71
633		TAG 50:5; TAG 14:0-16:0-20:5; [M+NH4]+ C53H92O6---TAG 50:5; TAG 16:0-16:1-18:4; [M+NH4]+ C53H92O6	M+H 1+	825.694		754.6	1126.4	2514.6	762.7		682.8			932.2		6.3	6.3	6.31	6.31		6.31			6.29		0.74	0.69	0.81	0.77		0.73			0.74
634		PC 38:7; [M+Na]+; GPCho(16:1(7Z)/22:6(4Z,7Z,10Z,13Z,16Z,19Z)) C46H78NO8P---PC 38:7; [M+Na]+; GPCho(16:1(9Z)/22:6(4Z,7Z,10Z,13Z,16Z,19Z)) C46H78NO8P---PC 38:7; [M+Na]+; GPCho(22:6(4Z,7Z,10Z,13Z,16Z,19Z)/16:1(7Z)) C46H78NO8P---PC 38:7; [M+Na]+; GPCho(22:6(4Z,7Z,10Z,13Z,16Z,19Z)/16:1(9Z)) C46H78NO8P	M+Na 1+	826.537						265.5			757.5							3.47			3.47							0.8			0.79
635		SM d43:2; SM d14:1/29:1; [M+H]+ C48H95N2O6P---SM d43:2; SM d14:2/29:0; [M+H]+ C48H95N2O6P---SM d43:2; SM d15:0/28:2; [M+H]+ C48H95N2O6P---SM d43:2; SM d15:1/28:1; [M+H]+ C48H95N2O6P---SM d43:2; SM d15:2/28:0; [M+H]+ C48H95N2O6P---SM d43:2; SM d16:1/27:1; [M+H]+ C48H95N2O6P---SM d43:2; SM d16:2/27:0; [M+H]+ C48H95N2O6P---SM d43:2; SM d17:0/26:2; [M+H]+ C48H95N2O6P---SM d43:2; SM d17:1/26:1; [M+H]+…	M+H 1+	827.699							92.8										4.84										0.92
636		TAG 50:4; TAG 16:0-16:1-18:3; [M+NH4]+ C53H94O6	M+H 1+	827.71							397.1	1368.4									6.45	6.46									0.84	0.82
636		TG 48:1; [M+Na]+; TG(14:0/16:0/18:1) C51H96O6	M+Na 1+	827.709									236.1										6.46										0.7
637		TAG 50:4; TAG 16:0-16:2-18:2; [M+NH4]+ C53H94O6	M+H 1+	827.71					335.7										5.49										0.56
638		TG 50:4; [M+NH4]+; TG(16:0/16:1/18:3) C53H94O6	M+H 1+	827.711		424.5	212.5	502.8		213.2		292.6		278.5		6.44	5.51	5.48		6.47		5.48		6.2		0.78	0.57	0.79		0.62		0.79		0.77
639		PC 38:6; [M+Na]+; GPCho(16:0/22:6(4Z,7Z,10Z,13Z,16Z,19Z)) C46H80NO8P---PC 38:6; [M+Na]+; GPCho(18:2(2E,4E)/20:4(5E,8E,11E,14E)) C46H80NO8P---PC 38:6; [M+Na]+; GPCho(18:2(2E,4E)/20:4(5Z,8Z,11Z,14Z)) C46H80NO8P---PC 38:6; [M+Na]+; GPCho(18:2(2E,4E)/20:4(7E,10E,13E,16E)) C46H80NO8P---PC 38:6; [M+Na]+; GPCho(18:2(6Z,9Z)/20:4(5E,8E,11E,14E)) C46H80NO8P---PC 38:6; [M+Na]+; GPCho(18:2(6Z,9Z)/20:4(5Z,8Z,…	M+Na 1+	828.552	4674.6	4376.6	5646.2	4086.1	4993.5	4150.2	3720.2	4348.8	4277.3	5001.8	3.74	3.74	3.64	3.74	3.74	3.74	3.75	3.75	3.74	3.74	0.92	0.91	0.84	0.92	0.91	0.92	0.91	0.92	0.91	0.92
640		1-Palmitoyl-2-docosahexaenoyl-sn-glycero-3-phosphocholine [M+H]+ C46H80NO8P NIST 1197232	M+Na 1+	828.553	195.6		108.9			202	158.4				3.37		3.35			3.37	3.38				0.82		0.7			0.92	0.8
641		SM d43:1; SM d14:0/29:1; [M+H]+ C48H97N2O6P---SM d43:1; SM d14:1/29:0; [M+H]+ C48H97N2O6P---SM d43:1; SM d15:0/28:1; [M+H]+ C48H97N2O6P---SM d43:1; SM d15:1/28:0; [M+H]+ C48H97N2O6P---SM d43:1; SM d16:0/27:1; [M+H]+ C48H97N2O6P---SM d43:1; SM d16:1/27:0; [M+H]+ C48H97N2O6P---SM d43:1; SM d17:0/26:1; [M+H]+ C48H97N2O6P---SM d43:1; SM d17:1/26:0; [M+H]+ C48H97N2O6P---SM d43:1; SM d18:0/25:1; [M+H]+…	M+H 1+	829.715		274.8	242.1	209.7		188.6	129.4		447.7	242.4		5.14	5.14	5.14		5.16	5.13		5.14	5.12		0.9	0.95	0.93		0.96	0.96		0.97	0.91
642		TAG 50:3; TAG 16:0-16:0-18:3; [M+NH4]+ C53H96O6	M+H 1+	829.726		258.7						309.1				6.59						5.69				0.85						0.78
643		TG 50:3; [M+NH4]+; TG(16:0/16:0/18:3) C53H96O6	M+H 1+	829.725	194.4	87.4	208.3	443.9	295.7	430.9		581	276.8		5.68	5.7	5.7	5.67	5.68	6.61		6.6	6.61		0.77	0.86	0.81	0.72	0.82	0.92		0.86	0.82
644		PC 38:5; [M+Na]+; GPCho(18:1(11E)/20:4(5E,8E,11E,14E)) C46H82NO8P---PC 38:5; [M+Na]+; GPCho(18:1(11E)/20:4(5Z,8Z,11Z,14Z)) C46H82NO8P---PC 38:5; [M+Na]+; GPCho(18:1(11E)/20:4(7E,10E,13E,16E)) C46H82NO8P---PC 38:5; [M+Na]+; GPCho(18:1(11Z)/20:4(5E,8E,11E,14E)) C46H82NO8P---PC 38:5; [M+Na]+; GPCho(18:1(11Z)/20:4(5Z,8Z,11Z,14Z)) C46H82NO8P---PC 38:5; [M+Na]+; GPCho(18:1(11Z)/20:4(7E,10E,13E,16E)) C4…	M+Na 1+	830.567							2102.6										3.89										0.9
645		1,2-Diarachidonoyl-sn-glycero-3-phosphocholine [M+H]+ C48H80NO8P NIST 1197194	M+H 1+	830.57	4088	2351	4076.9	1934.4	5065.5	5023.1	3584.9	4256.2	15480.6	2871.2	3.56	3.57	3.56	3.55	3.55	3.55	3.56	3.56	3.55	3.57	0.99	0.98	0.98	0.98	0.98	0.99	0.98	0.98	0.99	0.94
646		TAG 49:4; TAG 15:0-16:1-18:3; [M+NH4]+ C52H92O6---TAG 49:4; TAG 15:1-15:2-19:1; [M+NH4]+ C52H92O6---TAG 49:4; TAG 15:1-16:1-18:2; [M+NH4]+ C52H92O6---TAG 49:4; TAG 15:1-17:1-17:2; [M+NH4]+ C52H92O6---TAG 49:4; TAG 15:2-16:0-18:2; [M+NH4]+ C52H92O6	M+NH4 1+	830.723	686.6		132.7	423.6	213.8			271.9	120.5	650.9	6.1		6.13	6.11	6.13			6.1	6.11	6.21	0.69		0.58	0.69	0.69			0.72	0.61	0.74
647		PC 38:4; [M+Na]+; GPCho(14:0/24:4(5Z,8Z,11Z,14Z)) C46H84NO8P---PC 38:4; [M+Na]+; GPCho(18:0/20:4(5E,8E,11E,14E)) C46H84NO8P---PC 38:4; [M+Na]+; GPCho(18:0/20:4(5Z,8Z,11Z,14Z)) C46H84NO8P---PC 38:4; [M+Na]+; GPCho(18:0/20:4(7E,10E,13E,16E)) C46H84NO8P---PC 38:4; [M+Na]+; GPCho(20:4(5E,8E,11E,14E)/18:0) C46H84NO8P---PC 38:4; [M+Na]+; GPCho(20:4(5Z,8Z,11Z,14Z)/18:0) C46H84NO8P---PC 38:4; [M+Na]+; GP…	M+Na 1+	832.583	3336.8	2924.9	3650.7	3636.4	3065.9	3415.4	2841	1958.2	3792.6	3773.4	4.15	4.14	4.14	4.15	4.14	4.15	4.16	4.14	4.16	4.14	0.9	0.91	0.9	0.88	0.89	0.9	0.89	0.89	0.9	0.9
648		1-Octadecanoyl-2-(5Z,8Z,11Z,14Z-eicosatetraenoyl)-sn-glycero-3-phosphocholine [M+H]+ C46H84NO8P NIST 1220510	M+Na 1+	832.585	21228.6	11152	19188.5	14844.1	19518.7	30000	23684	7421.2	56177.7	18871.4	3.78	3.8	3.79	3.78	3.78	3.78	3.79	3.79	3.78	3.78	0.96	0.97	0.96	0.96	0.97	0.96	0.96	0.96	0.97	0.97
649		TAG 49:3; TAG 15:0-16:1-18:2; [M+NH4]+ C52H94O6	M+NH4 1+	832.739	3443.2	483.6	593.2	3050.4	1323.5		449.1	1010.6		1754.8	6.26	6.26	6.25	6.25	6.27		6.27	6.25		6.25	0.8	0.74	0.78	0.76	0.76		0.78	0.76		0.8
650		GlcADG 38:6; GlcADG 16:0-22:6; [M+NH4]+ C47H76O11	M+NH4 1+	834.571			241.2	453.9						195.9			3.47	3.36						3.5			0.64	0.59						0.57
651		1-Octadecanoyl-2-(4Z,7Z,10Z,13Z,16Z,19Z-docosahexaenoyl)-sn-glycero-3-phosphocholine [M+H]+ C48H84NO8P NIST 1197242	M+H 1+	834.601	57483.1	38562.9	50060.7	58996.6	76926.1	18686.2	17567.3	100787	52194.5	47964.9	4.09	4.08	4.08	4.09	4.08	4.09	4.08	4.08	4.08	4.08	0.98	0.98	0.98	0.98	0.98	0.98	0.98	0.98	0.98	0.98
652		1-Octadecanoyl-2-(4Z,7Z,10Z,13Z,16Z,19Z-docosahexaenoyl)-sn-glycero-3-phosphocholine [M+H]+ C48H84NO8P NIST 1197243	M+H 1+	834.598							19475.3	2872.1									3.95	3.81									0.91	0.91
653		TAG 49:2; TAG 13:0-15:0-21:2; [M+NH4]+ C52H96O6---TAG 49:2; TAG 15:0-15:1-19:1; [M+NH4]+ C52H96O6	M+NH4 1+	834.752	186.9							101.1			5.91							5.92			0.59							0.57
654		TAG 49:2; TAG 15:0-16:1-18:1; [M+NH4]+ C52H96O6	M+NH4 1+	834.753						718.5	45.4									6.41	5.92									0.72	0.6
655		TAG 49:2; TAG 15:0-16:0-18:2; [M+NH4]+ C52H96O6---TAG 49:2; TAG 16:0-16:1-17:1; [M+NH4]+ C52H96O6	M+NH4 1+	834.754	8315.2	1925.9	2295.5	8160.7	4065.3		1180.5	2602	1042.5	4100.5	6.41	6.4	6.4	6.41	6.41		6.41	6.39	6.4	6.4	0.82	0.76	0.74	0.76	0.81		0.71	0.78	0.7	0.72
656		N-Tetracosenoyl-4-sphingenyl-1-O-phosphorylcholine [M+Na]+ C47H93N2O6P NIST 1035610---N-Tetracosenoyl-4-sphingenyl-1-O-phosphorylcholine [M+Na]+ C47H93N2O6P NIST 1035611---N-Tetracosenoyl-4-sphingenyl-1-O-phosphorylcholine [M+Na]+ C47H93N2O6P NIST 1035612	M+Na 1+	835.667	1867.6	1896	2273.9	1556.6	2331.1	1745.5	1205.9	949.2	4718.6	2315.1	4.69	4.68	4.7	4.68	4.68	4.68	4.7	4.69	4.7	4.68	0.88	0.9	0.88	0.88	0.92	0.88	0.88	0.92	0.9	0.88
657		PC 38:0; PC 19:0-19:0; [M+H]+ C46H92NO8P	M+NH4 1+	835.68								61.4										6.08										0.73
658		1-Octadecanoyl-2-(4Z,7Z,10Z,13Z,16Z,19Z-docosahexaenoyl)-sn-glycero-3-phospho-L-serine [M+H]+ C46H78NO10P NIST 1196948	M+H 1+	836.544	3625.8	3379.7		2573.1	2854.6	3875.6	2351.9	2307.2	2914.1	2245.3	3.74	3.76		3.74	3.76	3.74	3.77	3.77	3.76	3.76	0.98	0.98		0.98	0.98	0.98	0.98	0.98	0.94	0.96
659		BMP 40:8; BMP 18:2-22:6; [M+NH4]+ C46H75O10P	M+NH4 1+	836.548						91.4										3.14										0.83
660		PC 40:5; PC 18:0-22:5; [M+H]+ C48H86NO8P---PC 40:5; PC 20:1-20:4; [M+H]+ C48H86NO8P	M+H 1+	836.613	18430.4			23175.6	25278.5		10186.4	12486.9	31429.1	12963.9	4.13			4.15	4.12		4.16	4.32	4.16	4.14	0.87			0.89	0.89		0.87	0.88	0.89	0.87
661		TAG 49:1; TAG 15:0-17:0-17:1; [M+NH4]+ C52H98O6	M+NH4 1+	836.767										177.1										6.11										0.53
662		TAG 49:1; TAG 15:0-16:0-18:1; [M+NH4]+ C52H98O6	M+NH4 1+	836.77	5479.8	1585.4	1722.9	4485.8	2623.3	865	1222.3	2400.4	1037.5	2902.3	6.55	6.55	6.54	6.55	6.55	6.55	6.56	6.54	6.55	6.56	0.85	0.84	0.84	0.84	0.87	0.78	0.8	0.82	0.84	0.85
663		SM 42:1; [M+Na]+; SM(d16:0/26:1(17Z)) C47H96N2O6P---SM 42:1; [M+Na]+; SM(d16:1(4E)/26:0) C47H96N2O6P---SM 42:1; [M+Na]+; SM(d18:0/24:1(15Z)) C47H96N2O6P---SM 42:1; [M+Na]+; SM(d18:1(4E)/24:0) C47H96N2O6P	M+Na 1+	837.682	773.1	969	812.2	701.7	1300.7	443.9	328.9	305.5	1355.1	823.8	5	5	5.01	5	5	5.01	5.01	5	5.01	5	0.87	0.85	0.86	0.84	0.89	0.86	0.86	0.81	0.87	0.87
664		TAG 49:3; TAG 15:0-16:1-18:2; [M+Na]+ C52H94O6	M+Na 1+	837.695								103.6										6.25										0.52
665		BMP 40:7; BMP 18:1-22:6; [M+NH4]+ C46H77O10P	M+NH4 1+	838.563						246.9	95									3.29	3.33									0.84	0.88
666		PC 38:1; [M+Na]+; GPCho(12:0/26:1(5Z)) C46H90NO8P---PC 38:1; [M+Na]+; GPCho(26:1(5Z)/12:0) C46H90NO8P	M+Na 1+	838.621								147.8										4.73										0.73
667		PC 40:4; PC 18:0-22:4; [M+H]+ C48H88NO8P---PC 40:4; PC 20:0-20:4; [M+H]+ C48H88NO8P	M+H 1+	838.627				7582.4				4548						4.35				4.29						0.89				0.89
668		TAG 49:0; TAG 16:0-16:0-17:0; [M+NH4]+ C52H100O6	M+NH4 1+	838.783	2086.5	1135.6	757		1109.6	751	930.1	1468.2		796.7	6.69	6.63	6.62		6.63	6.66	6.66	6.64		6.62	0.87	0.83	0.84		0.85	0.82	0.8	0.85		0.82
669		TAG 51:5; TAG 16:0-16:0-19:5; [M+NH4]+ C54H94O6	M+H 1+	839.711		139.4										6.4										0.64
670		PC 40:3; PC 20:0-20:3; [M+H]+ C48H90NO8P---PC 40:3; PC 22:1-18:2; [M+H]+ C48H90NO8P	M+H 1+	840.643					2968.9				2253.9						4.54				4.45						0.88				0.88
671		TAG 50:6; TAG 14:2-18:2-18:2; [M+NH4]+ C53H90O6---TAG 50:6; TAG 16:0-16:4-18:2; [M+NH4]+ C53H90O6---TAG 50:6; TAG 16:1-16:3-18:2; [M+NH4]+ C53H90O6	M+NH4 1+	840.708	585.3	55.7	61.9	549.6	186.5	63.5		167.2		378.4	5.93	5.99	5.99	5.98	5.99	5.94		5.92		5.94	0.55	0.57	0.51	0.66	0.82	0.78		0.65		0.71
672		TAG 51:4; TAG 16:0-16:1-19:3; [M+NH4]+ C54H96O6	M+H 1+	841.72				53.2										5.6										0.6
673		TG 49:1; [M+Na]+; TG(16:0/16:0/17:1) C52H98O6	M+Na 1+	841.727						76.1										6.55										0.68
673		TG 51:4; [M+NH4]+; TG(16:0/17:1/18:3) C54H96O6	M+H 1+	841.726								113										6.56										0.7
674		PC 39:6; [M+Na]+; GPCho(17:0/22:6(4Z,7Z,10Z,13Z,16Z,19Z)) C47H82NO8P---PC 39:6; [M+Na]+; GPCho(22:6(4Z,7Z,10Z,13Z,16Z,19Z)/17:0) C47H82NO8P	M+Na 1+	842.565								179.5										3.91										0.68
675		1,2-Dieicosenoyl-sn-glycero-3-phosphocholine [M+H]+ C48H92NO8P NIST 1197185---1,2-Dieicosenoyl-sn-glycero-3-phosphocholine [M+H]+ C48H92NO8P NIST 1197188	M+H 1+	842.66	502.3	445.4	456.1	537.3	1137.4						4.73	4.79	4.72	4.73	4.73						0.97	0.92	0.96	0.52	0.93
676		TAG 50:5; TAG 14:0-18:2-18:3; [M+NH4]+ C53H92O6---TAG 50:5; TAG 16:0-16:2-18:3; [M+NH4]+ C53H92O6---TAG 50:5; TAG 16:0-16:3-18:2; [M+NH4]+ C53H92O6---TAG 50:5; TAG 16:1-16:1-18:3; [M+NH4]+ C53H92O6	M+NH4 1+	842.723	6137.7	470.1	654.8	6160.8	2125.8	326.4	517.1	1374.8	721	3322.4	6.06	6.11	6.11	6.1	6.1	6.06	6.06	6.04	6.05	6.06	0.79	0.74	0.72	0.82	0.66	0.76	0.78	0.78	0.73	0.7
677		TAG 49:0; TAG 16:0-16:0-17:0; [M+Na]+ C52H100O6	M+Na 1+	843.743								74.3										6.7										0.57
678		TAG 50:4; TAG 16:0-16:1-18:3; [M+NH4]+ C53H94O6---TAG 50:4; TAG 16:1-16:1-18:2; [M+NH4]+ C53H94O6	M+NH4 1+	844.74	57988.8	4195.8	6401	65921.1	20036.7	2152.4	3799.6	12625.8	5276.6	28330.5	6.18	6.22	6.21	6.2	6.2	6.18	6.18	6.19	6.19	6.19	0.81	0.81	0.79	0.77	0.73	0.8	0.77	0.73	0.85	0.87
679		PC 39:4; [M+Na]+; GPCho(15:0/24:4(5Z,8Z,11Z,14Z)) C47H86NO8P---PC 39:4; [M+Na]+; GPCho(24:4(5Z,8Z,11Z,14Z)/15:0) C47H86NO8P	M+Na 1+	846.6			122.5						293.1				4.32						4.32				0.71						0.84
680		TAG 50:3; TAG 16:0-16:1-18:2; [M+NH4]+ C53H96O6	M+NH4 1+	846.756	230560	53322.4	92980.2	391113	144148	10218.3	19656.9	59618.6	155.4,23955.2	140369	6.33	6.34	6.34	6.33	6.33	6.35	6.33	6.33	7.53,6.34	6.33	0.9	0.95	0.94	0.88	0.94	0.87	0.88	0.88	0.83,0.86	0.9
681		TAG 50:5; TAG 14:0-18:2-18:3; [M+Na]+ C53H92O6---TG 50:5; [M+Na]+; TG(16:1/16:1/18:3) C53H92O6	M+Na 1+	847.678	1077.4			868.9				292.8		563.3	6.06			6.08				6.04		6.06	0.73			0.64				0.64		0.69
681		TAG 52:8; TAG 16:0-18:4-18:4; [M+NH4]+ C55H90O6---TAG 52:8; TAG 16:1-16:1-20:6; [M+NH4]+ C55H90O6---TAG 52:8; TAG 16:3-18:2-18:3; [M+NH4]+ C55H90O6	M+H 1+	847.678					387.8		153		174.6						6.1		6.06		6.05						0.56		0.69		0.57
682		PC 39:3; PC 19:0-20:3; [M+H]+ C47H88NO8P	M+Na 1+	848.615				653.4						1021.9				4.25						4.24				0.61						0.64
682		PC 41:6; PC 19:0-22:6; [M+H]+ C49H86NO8P	M+H 1+	848.617	1309.3							2142.2			4.25							4.25			0.9							0.9
683		TAG 50:2; TAG 16:0-16:0-18:2; [M+NH4]+ C53H98O6---TAG 50:2; TAG 16:0-16:1-18:1; [M+NH4]+ C53H98O6	M+NH4 1+	848.772	351181	87221.4	420.8,152575.7	536368	196241	15944.7	34392.2	119160	34437.5	195131	6.49	6.49	8.90,6.48	6.47	6.47	6.49	6.49	6.5	6.48	6.48	0.86	0.92	0.89,0.95	0.94	0.9	0.85	0.87	0.82	0.85	0.91
684		TAG 52:7; TAG 14:0-18:2-20:5; [M+NH4]+ C55H92O6---TAG 52:7; TAG 16:1-18:2-18:4; [M+NH4]+ C55H92O6	M+H 1+	849.695	3609.1			3795		464.1	799.9	1780.3		2346	6.18			6.18		6.18	6.18	6.19		6.19	0.74			0.74		0.7	0.74	0.73		0.84
684		TG 50:4; [M+Na]+; TG(16:0/16:1/18:3) C53H94O6	M+Na 1+	849.694		706.5	1074.2		1767.9				829.2			6.2	6.21		6.2				6.19			0.83	0.82		0.72				0.75
685		TAG 50:1; TAG 15:0-16:0-19:1; [M+NH4]+ C53H100O6	M+NH4 1+	850.779			13489.8										6.21										0.53
686		1,2-Dihexadecanoyl-3-(9Z-octadecenoyl)-sn-glycerol [M+H]+ C53H100O6 NIST 1196897	M+NH4 1+	850.787	199549	39478.2	66946.2	246096	81381.3	13052.4	19768.2	71163.1	22686.2	81537.8	6.63	6.63	6.62	6.61	6.63	6.64	6.62	6.62	6.63	6.62	0.97	0.97	0.97	0.97	0.97	0.97	0.97	0.96	0.97	0.97
687		TAG 50:3; TAG 16:0-16:1-18:2; [M+Na]+ C53H96O6---TG 50:3; [M+Na]+; TG(16:0/16:1/18:2) C53H96O6	M+Na 1+	851.71	6437.8	3346.4	4692.4	8762.7	4048.9	1238.8	2026.8	3391.6	1805.4	4742.3	6.33	6.34	6.34	6.33	6.33	6.35	6.33	6.33	6.34	6.33	0.78	0.72	0.77	0.76	0.76	0.74	0.76	0.79	0.76	0.8
688		PC 40:8; [M+Na]+; GPCho(20:4(5E,8E,11E,14E)/20:4(5E,8E,11E,14E)) C48H80NO8P---PC 40:8; [M+Na]+; GPCho(20:4(5E,8E,11E,14E)/20:4(5Z,8Z,11Z,14Z)) C48H80NO8P---PC 40:8; [M+Na]+; GPCho(20:4(5E,8E,11E,14E)/20:4(7E,10E,13E,16E)) C48H80NO8P---PC 40:8; [M+Na]+; GPCho(20:4(5Z,8Z,11Z,14Z)/20:4(5E,8E,11E,14E)) C48H80NO8P---PC 40:8; [M+Na]+; GPCho(20:4(5Z,8Z,11Z,14Z)/20:4(5Z,8Z,11Z,14Z)) C48H80NO8P---PC 40:8;…	M+Na 1+	852.552	302.6	206.9	277.2			367.4	274	351.6	716.3		3.56	3.53	3.56			3.55	3.56	3.56	3.55		0.83	0.83	0.79			0.89	0.83	0.81	0.88
689		TAG 50:0; TAG 16:0-16:0-18:0; [M+NH4]+ C53H102O6	M+NH4 1+	852.802	16434.7	5179	8594.3	36902.3	7899.3	1675.9	4439.6	12269.8	4147		6.77	6.78	6.77	6.78	6.78	6.76	6.78	6.77	6.78		0.96	0.95	0.96	0.95	0.95	0.94	0.95	0.96	0.96
690		TG 50:2; [M+Na]+; TG(16:0/16:1/18:1) C53H98O6	M+Na 1+	853.727			4535.3	5894.2,1678.8						527.4			6.48	6.47,5.52						5.54			0.69	0.68,0.74						0.83
690		TG 52:5; [M+NH4]+; TG(16:0/18:2/18:3) C55H96O6	M+H 1+	853.726	5954.8		607.2	685.8	1835.7,4200.9	1275.6	1948.1	4451	1591.7		6.49		5.55	6.25	5.55,6.47	6.49	6.47	6.48	6.48		0.72		0.58	0.73	0.72,0.73	0.75	0.79	0.8	0.72
691		TAG 50:2; TAG 16:0-16:0-18:2; [M+Na]+ C53H98O6	M+Na 1+	853.729								990.4										5.52										0.66
691		TAG 52:5; TAG 16:0-18:1-18:4; [M+NH4]+ C55H96O6	M+H 1+	853.728	644	275.5									5.54	5.58									0.56	0.78
692	*	ISF of TAG 52:5; TAG 16:0-18:2-18:3; [M+NH4]+ C55H96O6	-	597.487	273.2										6.24										0.92
692	*	TAG 52:5; TAG 16:0-18:2-18:3; [M+NH4]+ C55H96O6	M+H 1+	853.727	888.6	3442.7,130.3									6.22	6.49,6.24									0.72	0.78,0.82
[truncated: 218 more rows]

## Sheet: MSDIAL-Neg-Aqu
																											Class	1	1	1	1	1	1	1	1	1	1
[truncated: 1,176 more rows]

[truncated: 3 more sheets: MSDIAL-Neg-Org, MSDIAL-Pos-Aqu, MSDIAL-Pos-Org]
