# Supplementary material for: MetaboKit: a comprehensive data extraction tool for untargeted metabolomics
Source: Royal Society of Chemistry journal article supplement (doi:10.1039/d0mo00030b), 2020-06-10
Supplement: d0mo00030b5.xlsx [file d0mo00030b5.xlsx]

## Sheet: Legend
Supplementary Table 4
MetaboKit-Negative	Quantitative data extracted from SWATH-MS analysis in negative ionization mode by MetaboKit
MetaboKit-Positive	Quantitative data extracted from SWATH-MS analysis in positive ionization mode by MetaboKit
NegativeMode_Quality	Coefficient of variations and correlation against known concentrations in the negative ionization mode (91 standards)
PositiveMode_Quality	Coefficient of variations and correlation against known concentrations in the positive ionization mode (91 standards)
MSDIAL-Negative	Quantitative data extracted from SWATH-MS analysis in negative ionization mode by MS-DIAL
MSDIAL-Positive	Quantitative data extracted from SWATH-MS analysis in positive ionization mode by MS-DIAL
Notes
0. For MetaboKit output: each tab has five sections:
	(i) Database match information including compound names
	(ii) Precursor peak area per sample
	(iii) RT of detection per sample
	(iv) Database match score per sample (DOTP, or dot product, to the spectral library)
	(v) Average correlation between the current fragment and all others within a compound (COR)

## Sheet: MetaboKit-Negative
group	compound	Quantification Mode	adduct	mass	RT(library)	Mix-10ng-ml_r1	Mix-10ng-ml_r2	Mix-10ng-ml_r3	Mix-25ng-ml_r1	Mix-25ng-ml_r2	Mix-25ng-ml_r3	Mix-50ng-ml_r1	Mix-50ng-ml_r2	Mix-50ng-ml_r3	Mix-100ng-ml_r1	Mix-100ng-ml_r2	Mix-100ng-ml_r3	Mix-250ng-ml_r1	Mix-250ng-ml_r2	Mix-250ng-ml_r3	Mix-500ng-ml_r1	Mix-500ng-ml_r2	Mix-500ng-ml_r3	RT_Mix-10ng-ml_r1	RT_Mix-10ng-ml_r2	RT_Mix-10ng-ml_r3	RT_Mix-25ng-ml_r1	RT_Mix-25ng-ml_r2	RT_Mix-25ng-ml_r3	RT_Mix-50ng-ml_r1	RT_Mix-50ng-ml_r2	RT_Mix-50ng-ml_r3	RT_Mix-100ng-ml_r1	RT_Mix-100ng-ml_r2	RT_Mix-100ng-ml_r3	RT_Mix-250ng-ml_r1	RT_Mix-250ng-ml_r2	RT_Mix-250ng-ml_r3	RT_Mix-500ng-ml_r1	RT_Mix-500ng-ml_r2	RT_Mix-500ng-ml_r3	DOTP_Mix-10ng-ml_r1	DOTP_Mix-10ng-ml_r2	DOTP_Mix-10ng-ml_r3	DOTP_Mix-25ng-ml_r1	DOTP_Mix-25ng-ml_r2	DOTP_Mix-25ng-ml_r3	DOTP_Mix-50ng-ml_r1	DOTP_Mix-50ng-ml_r2
1	L-Serine [M-H]- C3H7NO3 NIST 1189377---Serine C3H7NO3	MS1	M-H	104.035	58.86				1.56				3.17		8.75	7.9	6.79	19.11	18.66	18.24	42.28	40.66	42.06				58.9				58.9		58.4	58.4	58.4	58.4	58.4	58.4	58.4	58.4	58.4				0.79				1
1	L-Serine [M-H]- C3H7NO3 NIST 1189377---Serine C3H7NO3	MS2	M-H	74.0249	58.86				1.29				1.08		2.89	3.96	2.52	7.63	11.02	9.73	13.48	13.88	7.54				58.9				58.9		58.4	58.4	58.4	58.4	58.4	58.4	58.4	58.4	58.4				0.79				1
1	L-Serine [M-H]- C3H7NO3 NIST 1189377---Serine C3H7NO3	MS2	M-H	104.038	58.86				0				0.35		0.35	0	0	0.78	1.96	3.17	2.69	1.31	0.89				58.9				58.9		58.4	58.4	58.4	58.4	58.4	58.4	58.4	58.4	58.4				0.79				1
1	L-Serine [M-H]- C3H7NO3 NIST 1189377---Serine C3H7NO3	MS2	M-H	72.0104	58.86				0.18				0.29		0.68	1.24	0.56	1.72	3.36	1.66	3.08	2.84	1.78				58.9				58.9		58.4	58.4	58.4	58.4	58.4	58.4	58.4	58.4	58.4				0.79				1
2	Threonine; LC-ESI-ITFT; MS2; CE 25.0 eV; [M-H]- C4H9NO3	MS1	M-H	118.05	58.75												3.6		7.88		17.97	17.91	21.3												58.8		59.5		58.4	58.4	59.5
2	Threonine; LC-ESI-ITFT; MS2; CE 25.0 eV; [M-H]- C4H9NO3	MS2	M-H	118.055	58.75												0.91		0.15		0.72	0.72	0.42												58.8		59.5		58.4	58.4	59.5
2	Threonine; LC-ESI-ITFT; MS2; CE 25.0 eV; [M-H]- C4H9NO3	MS2	M-H	74.0237	58.75												2.61		10.8		13.48	13.88	7.72												58.8		59.5		58.4	58.4	59.5
3	Purine C5H4N4	MS1	M-H	119.036	134.41	8.84	8.33		18.42	17.98	18.36	36.71	38.7	34.81	73.3	72.16	70.15	184.4	178.03	179.35	345	359.56	338.63	134.3	133.2		133.2	133.2	134.3	134.3	134.3	132.1	134.3	133.2	133.2	134.3	133.2	134.3	133.2	133.2	133.2	0.94	0.9		0.98	0.98	0.98	0.99	0.99
3	Purine C5H4N4	MS2	M-H	119.036	134.41	7.41	7.99		20.48	21.42	19.17	33.02	36.8	42.93	84.21	91.53	61.95	189.42	227.63	199.15	423.18	405.2	437.31	134.3	133.2		133.2	133.2	134.3	134.3	134.3	132.1	134.3	133.2	133.2	134.3	133.2	134.3	133.2	133.2	133.2	0.94	0.9		0.98	0.98	0.98	0.99	0.99
3	Purine C5H4N4	MS2	M-H	65.0143	134.41	0	0.96		1.09	1.65	1.23	2.31	1.99	2.44	4.38	4.69	6.21	11.74	12.37	10.5	27.81	31.4	26.52	134.3	133.2		133.2	133.2	134.3	134.3	134.3	132.1	134.3	133.2	133.2	134.3	133.2	134.3	133.2	133.2	133.2	0.94	0.9		0.98	0.98	0.98	0.99	0.99
3	Purine C5H4N4	MS2	M-H	92.0252	134.41	0.2	0.67		1.7	2.43	1.44	2.64	3.81	1.94	3.94	5.15	3.91	11.14	11.09	9.79	23.5	31.2	24.49	134.3	133.2		133.2	133.2	134.3	134.3	134.3	132.1	134.3	133.2	133.2	134.3	133.2	134.3	133.2	133.2	133.2	0.94	0.9		0.98	0.98	0.98	0.99	0.99
3	Purine C5H4N4	MS2	M-H	67.0297	134.41	0	0.23		0	0.06	0	0.94	0.34	0.8	0	1.54	0.83	3.22	2.94	1.54	4.96	7.1	7.5	134.3	133.2		133.2	133.2	134.3	134.3	134.3	132.1	134.3	133.2	133.2	134.3	133.2	134.3	133.2	133.2	133.2	0.94	0.9		0.98	0.98	0.98	0.99	0.99
3	Purine C5H4N4	MS2	M-H	64.0076	134.41	0	0		0	0	0	0	0	0	0.11	0	0.22	0.95	0.22	1.34	2.14	2.51	1.92	134.3	133.2		133.2	133.2	134.3	134.3	134.3	132.1	134.3	133.2	133.2	134.3	133.2	134.3	133.2	133.2	133.2	0.94	0.9		0.98	0.98	0.98	0.99	0.99
3	Purine C5H4N4	MS2	M-H	90.0099	134.41	0	0		0	0	0	0	0.4	0	0.2	0.13	1.06	1.49	0.86	1.19	4.38	4.52	2.54	134.3	133.2		133.2	133.2	134.3	134.3	134.3	132.1	134.3	133.2	133.2	134.3	133.2	134.3	133.2	133.2	133.2	0.94	0.9		0.98	0.98	0.98	0.99	0.99
4	L-Asparagine [M-H]- C4H8N2O3 NIST 1188004---L-Asparagine [M-H]- C4H8N2O3 NIST 1188005	MS1	M-H	131.046	58.75				1.74	1.47	1.41	3.63	4.11	3.31	8.1	8	8.37	20.52	20.9	19.34	43.96	45.51	44.94				58.8	58.8	58.8	58.8	58.8	58.8	58.4	58.4	58.4	58.4	58.4	58.4	58.4	58.4	58.4				0.78	0.91	0.88	0.9	0.96
4	L-Asparagine [M-H]- C4H8N2O3 NIST 1188004---L-Asparagine [M-H]- C4H8N2O3 NIST 1188005	MS2	M-H	114.021	58.75				0.82	1.56	0.44	1.19	2.9	0.3	1.82	4.35	3.08	5.97	6.88	3.46	5.65	9.82	10.8				58.8	58.8	58.8	58.8	58.8	58.8	58.4	58.4	58.4	58.4	58.4	58.4	58.4	58.4	58.4				0.78	0.91	0.88	0.9	0.96
4	L-Asparagine [M-H]- C4H8N2O3 NIST 1188004---L-Asparagine [M-H]- C4H8N2O3 NIST 1188005	MS2	M-H	70.03	58.75				0.29	0.12	0.23	0.79	0.35	0	0.76	0.61	1.08	1.63	1.23	1.35	1.25	3.71	4.67				58.8	58.8	58.8	58.8	58.8	58.8	58.4	58.4	58.4	58.4	58.4	58.4	58.4	58.4	58.4				0.78	0.91	0.88	0.9	0.96
4	L-Asparagine [M-H]- C4H8N2O3 NIST 1188004---L-Asparagine [M-H]- C4H8N2O3 NIST 1188005	MS2	M-H	113.037	58.75				0.81	0.44	0	2	1.04	0.52	0.37	1.89	1.85	3.37	3.7	2.03	4.45	5.69	5.46				58.8	58.8	58.8	58.8	58.8	58.8	58.4	58.4	58.4	58.4	58.4	58.4	58.4	58.4	58.4				0.78	0.91	0.88	0.9	0.96
4	L-Asparagine [M-H]- C4H8N2O3 NIST 1188004---L-Asparagine [M-H]- C4H8N2O3 NIST 1188005	MS2	M-H	131.046	58.75				0	0	0.08	0	0.36	0	0.32	0.56	0.48	1.04	2.35	0.48	1.11	2.39	2.27				58.8	58.8	58.8	58.8	58.8	58.8	58.4	58.4	58.4	58.4	58.4	58.4	58.4	58.4	58.4				0.78	0.91	0.88	0.9	0.96
4	L-Asparagine [M-H]- C4H8N2O3 NIST 1188004---L-Asparagine [M-H]- C4H8N2O3 NIST 1188005	MS2	M-H	72.0081	58.75				0	1.51	1.62	2.51	2.51	1.71	1.77	1.62	3.31	4.2	3.69	3.91	5.8	7.48	7.85				58.8	58.8	58.8	58.8	58.8	58.8	58.4	58.4	58.4	58.4	58.4	58.4	58.4	58.4	58.4				0.78	0.91	0.88	0.9	0.96
4	L-Asparagine [M-H]- C4H8N2O3 NIST 1188004---L-Asparagine [M-H]- C4H8N2O3 NIST 1188005	MS2	M-H	58.0295	58.75				0	0.11	0.61	0.5	0.64	0.32	0.69	0.64	0.61	0.93	1.94	0.61	2.61	2.71	3.48				58.8	58.8	58.8	58.8	58.8	58.8	58.4	58.4	58.4	58.4	58.4	58.4	58.4	58.4	58.4				0.78	0.91	0.88	0.9	0.96
5	L-Aspartic acid [M-H]- C4H7NO4 NIST 1189478---L-Aspartic acid [M-H]- C4H7NO4 NIST 1189479	MS1	M-H	132.03	57.28	2.59	2.18	2.33	7.73	7.21	6.28	13.77	14.64	16	29.32	29.98	27.45	72	73.94	71.38	137.75	135	140.84	57.3	57.3	57.3	57.3	57.3	57.3	57.3	57.3	57.3	57.3	57.3	57.3	57.3	57.3	57.3	57.3	57.3	57.3	0.75	0.78	0.85	0.8	0.88	0.87	0.93	0.94
5	L-Aspartic acid [M-H]- C4H7NO4 NIST 1189478---L-Aspartic acid [M-H]- C4H7NO4 NIST 1189479	MS2	M-H	88.0409	57.28	2.45	0.72	2.06	3.27	5.12	3.04	6.1	6.89	3.76	9.2	10.51	14.88	22.58	17.67	17.34	37.02	63.86	69.77	57.3	57.3	57.3	57.3	57.3	57.3	57.3	57.3	57.3	57.3	57.3	57.3	57.3	57.3	57.3	57.3	57.3	57.3	0.75	0.78	0.85	0.8	0.88	0.87	0.93	0.94
5	L-Aspartic acid [M-H]- C4H7NO4 NIST 1189478---L-Aspartic acid [M-H]- C4H7NO4 NIST 1189479	MS2	M-H	132.031	57.28	0	0.16	0	0.72	0.8	0.08	1.28	3.32	0	3.96	5.22	5.41	7.75	10.97	2.72	5.74	20.3	13.28	57.3	57.3	57.3	57.3	57.3	57.3	57.3	57.3	57.3	57.3	57.3	57.3	57.3	57.3	57.3	57.3	57.3	57.3	0.75	0.78	0.85	0.8	0.88	0.87	0.93	0.94
5	L-Aspartic acid [M-H]- C4H7NO4 NIST 1189478---L-Aspartic acid [M-H]- C4H7NO4 NIST 1189479	MS2	M-H	71.0125	57.28	2.37	2.49	1.81	3.18	3.25	2.38	4.16	3.85	3.01	3.37	4.29	5.8	8.57	8.09	5.51	12.13	15.75	22.23	57.3	57.3	57.3	57.3	57.3	57.3	57.3	57.3	57.3	57.3	57.3	57.3	57.3	57.3	57.3	57.3	57.3	57.3	0.75	0.78	0.85	0.8	0.88	0.87	0.93	0.94
5	L-Aspartic acid [M-H]- C4H7NO4 NIST 1189478---L-Aspartic acid [M-H]- C4H7NO4 NIST 1189479	MS2	M-H	72.0101	57.28	0	1.27	1.5	0.53	0.95	0.06	1.91	1.33	0	1.74	1.42	2.94	4.2	3.22	4.02	5.68	7.77	8.09	57.3	57.3	57.3	57.3	57.3	57.3	57.3	57.3	57.3	57.3	57.3	57.3	57.3	57.3	57.3	57.3	57.3	57.3	0.75	0.78	0.85	0.8	0.88	0.87	0.93	0.94
5	L-Aspartic acid [M-H]- C4H7NO4 NIST 1189478---L-Aspartic acid [M-H]- C4H7NO4 NIST 1189479	MS2	M-H	115.009	57.28	1.42	1.64	1.95	5.5	2.65	3.1	3.84	5.26	2.24	2.39	5.02	5.49	7.55	8.52	7.09	8.09	23.12	14.58	57.3	57.3	57.3	57.3	57.3	57.3	57.3	57.3	57.3	57.3	57.3	57.3	57.3	57.3	57.3	57.3	57.3	57.3	0.75	0.78	0.85	0.8	0.88	0.87	0.93	0.94
5	L-Aspartic acid [M-H]- C4H7NO4 NIST 1189478---L-Aspartic acid [M-H]- C4H7NO4 NIST 1189479	MS2	M-H	115	57.28	4.36	4.4	5.07	5.57	4.29	4.4	4.48	5.44	5.33	3.92	5.99	5.95	8.44	8.84	7.61	8.29	23.2	14.62	57.3	57.3	57.3	57.3	57.3	57.3	57.3	57.3	57.3	57.3	57.3	57.3	57.3	57.3	57.3	57.3	57.3	57.3	0.75	0.78	0.85	0.8	0.88	0.87	0.93	0.94
6	Adenine C5H5N5 MoNA 440100	MS1	M-H	134.047	145.96	5.01	4.81	5.36	16.53	14.44	15.11	32.74	32.28	31.01	65.6	64.74	66.26	179.03	176.69	168.86	355.4	332.58	339.42	146	146	146	145.3	144.2	145.3	145.3	145.3	144.2	145.3	145.3	145.3	145.3	145.3	146.4	145.3	145.3	144.2	0.92	0.96	0.94	0.99	0.97	0.98	0.96	0.98
6	Adenine C5H5N5 MoNA 440100	MS2	M-H	134.047	145.96	2.7	4.8	4.24	14.32	11.58	7.51	19.74	25.16	19.07	38.24	40.67	61.01	112.03	156.42	140.25	323.01	224.92	187.78	146	146	146	145.3	144.2	145.3	145.3	145.3	144.2	145.3	145.3	145.3	145.3	145.3	146.4	145.3	145.3	144.2	0.92	0.96	0.94	0.99	0.97	0.98	0.96	0.98
6	Adenine C5H5N5 MoNA 440100	MS2	M-H	107.036	145.96	0.29	0.58	1.04	3.78	4.72	2.92	9.67	7.77	8.37	12.05	17.07	18.02	44.49	42.79	54.7	98.51	75.36	72.35	146	146	146	145.3	144.2	145.3	145.3	145.3	144.2	145.3	145.3	145.3	145.3	145.3	146.4	145.3	145.3	144.2	0.92	0.96	0.94	0.99	0.97	0.98	0.96	0.98
6	Adenine C5H5N5 MoNA 440100	MS2	M-H	92.0254	145.96	1.66	0.53	0	1.8	1.28	1.15	2.04	2.5	2.3	2.47	6.49	4.44	8.31	6.89	11.66	15.83	14.55	16.71	146	146	146	145.3	144.2	145.3	145.3	145.3	144.2	145.3	145.3	145.3	145.3	145.3	146.4	145.3	145.3	144.2	0.92	0.96	0.94	0.99	0.97	0.98	0.96	0.98
6	Adenine C5H5N5 MoNA 440100	MS2	M-H	65.0139	145.96	0	0.34	0	1.04	0	0.39	1.01	0.9	0.62	0.53	1.01	1.26	4.17	2.67	4.46	5.4	7.99	10.89	146	146	146	145.3	144.2	145.3	145.3	145.3	144.2	145.3	145.3	145.3	145.3	145.3	146.4	145.3	145.3	144.2	0.92	0.96	0.94	0.99	0.97	0.98	0.96	0.98
6	Adenine C5H5N5 MoNA 440100	MS2	M-H	106.029	145.96	0	0	0	0	0	0	0	0	0	0	0.29	0	0	0	0	2.11	0.43	0.93	146	146	146	145.3	144.2	145.3	145.3	145.3	144.2	145.3	145.3	145.3	145.3	145.3	146.4	145.3	145.3	144.2	0.92	0.96	0.94	0.99	0.97	0.98	0.96	0.98
6	Adenine C5H5N5 MoNA 440100	MS2	M-H	68.0262	145.96	0	0	0	0	0	0	0.86	0	0	0	0	0.11	0.98	0	0.74	1.66	2.1	2.65	146	146	146	145.3	144.2	145.3	145.3	145.3	144.2	145.3	145.3	145.3	145.3	145.3	146.4	145.3	145.3	144.2	0.92	0.96	0.94	0.99	0.97	0.98	0.96	0.98
7	Hypoxanthine C5H4N4O	MS1	M-H	135.031	95.6	4.39	3.78	3.71	11.46	10.15	9.52	20.58	20.68	25.24	39.52	40.19	39.06	102.53	99.5	97.81	188.79	195.71	188.42	95.6	95.6	95.8	95.8	95.8	95.8	95.8	95.8	94.7	95.8	95.8	95.8	95.8	95.8	95.8	95.8	95.8	95.8	0.94	0.94	0.93	0.98	0.94	0.96	0.98	0.98
7	Hypoxanthine C5H4N4O	MS2	M-H	92.0255	95.6	2.14	2.01	2.24	4.54	4.85	3.58	8.28	7.17	4.42	13.14	16	13.52	34.28	28.25	24.6	53.79	80.97	63.19	95.6	95.6	95.8	95.8	95.8	95.8	95.8	95.8	94.7	95.8	95.8	95.8	95.8	95.8	95.8	95.8	95.8	95.8	0.94	0.94	0.93	0.98	0.94	0.96	0.98	0.98
7	Hypoxanthine C5H4N4O	MS2	M-H	135.031	95.6	2.02	1.29	3.41	4.98	3.96	2.72	5.95	6.39	4.7	19.75	13.27	19.48	17.9	33.64	28.53	59.2	108.84	74.88	95.6	95.6	95.8	95.8	95.8	95.8	95.8	95.8	94.7	95.8	95.8	95.8	95.8	95.8	95.8	95.8	95.8	95.8	0.94	0.94	0.93	0.98	0.94	0.96	0.98	0.98
7	Hypoxanthine C5H4N4O	MS2	M-H	65.0147	95.6	0.36	1.04	0.67	1.85	1.77	0.9	3.39	2.61	2.98	5.73	5.58	5.51	15.41	14.63	11.95	24.87	23.58	21.83	95.6	95.6	95.8	95.8	95.8	95.8	95.8	95.8	94.7	95.8	95.8	95.8	95.8	95.8	95.8	95.8	95.8	95.8	0.94	0.94	0.93	0.98	0.94	0.96	0.98	0.98
7	Hypoxanthine C5H4N4O	MS2	M-H	66.0097	95.6	0.23	0.57	0.45	1.16	0.37	0.6	1.1	1.64	1.84	1.89	2.88	3.05	7.33	7.26	6.25	9.59	10.71	7.84	95.6	95.6	95.8	95.8	95.8	95.8	95.8	95.8	94.7	95.8	95.8	95.8	95.8	95.8	95.8	95.8	95.8	95.8	0.94	0.94	0.93	0.98	0.94	0.96	0.98	0.98
7	Hypoxanthine C5H4N4O	MS2	M-H	133.016	95.6	0	0.44	0.88	0.28	0.96	0	1.49	1.04	0.72	3.17	1.93	2.89	6.03	5.5	5.58	12.38	10.79	12.68	95.6	95.6	95.8	95.8	95.8	95.8	95.8	95.8	94.7	95.8	95.8	95.8	95.8	95.8	95.8	95.8	95.8	95.8	0.94	0.94	0.93	0.98	0.94	0.96	0.98	0.98
7	Hypoxanthine C5H4N4O	MS2	M-H	106.028	95.6	0	0	0	0	0	0	0.61	0	0.07	0.43	0.79	0.21	2.15	1.94	1.83	2.87	2.84	2.41	95.6	95.6	95.8	95.8	95.8	95.8	95.8	95.8	94.7	95.8	95.8	95.8	95.8	95.8	95.8	95.8	95.8	95.8	0.94	0.94	0.93	0.98	0.94	0.96	0.98	0.98
8	Indole-3-carboxaldehyde C9H7NO	MS1	M-H	144.046	482.17		4.3		3.07		4.98		4.22	4.02	6.47	6.25		4.77	5.69	6.6	9.56		9.63		482.2		482.2		482.2		482.2	482.2	482.2	482.2		481.9	481.9	481.9	480.8		480.8		0.93		0.89		0.9		0.87
8	Indole-3-carboxaldehyde C9H7NO	MS2	M-H	144.045	482.17		6.77		6.06		5.47		4.46	4.55	2.88	7.82		5.48	6.44	8.99	8.12		12.42		482.2		482.2		482.2		482.2	482.2	482.2	482.2		481.9	481.9	481.9	480.8		480.8		0.93		0.89		0.9		0.87
8	Indole-3-carboxaldehyde C9H7NO	MS2	M-H	99.9269	482.17		7.09		8.22		9.07		7.47	6.47	5.12	8.33		2.12	2.98	4.58	2.13		3.16		482.2		482.2		482.2		482.2	482.2	482.2	482.2		481.9	481.9	481.9	480.8		480.8		0.93		0.89		0.9		0.87
8	Indole-3-carboxaldehyde C9H7NO	MS2	M-H	115.044	482.17		0.3		0.6		1.19		0.82	0.6	0.3	0.3		0.34	0.52	0.74	0.75		1.15		482.2		482.2		482.2		482.2	482.2	482.2	482.2		481.9	481.9	481.9	480.8		480.8		0.93		0.89		0.9		0.87
8	Indole-3-carboxaldehyde C9H7NO	MS2	M-H	142.026	482.17		0		0		0		0	0	0	0		0.08	0	0	0		0		482.2		482.2		482.2		482.2	482.2	482.2	482.2		481.9	481.9	481.9	480.8		480.8		0.93		0.89		0.9		0.87
8	Indole-3-carboxaldehyde C9H7NO	MS2	M-H	126.041	482.17		0		0		0		0	0	0	0		0	0.16	0	0.31		0.23		482.2		482.2		482.2		482.2	482.2	482.2	482.2		481.9	481.9	481.9	480.8		480.8		0.93		0.89		0.9		0.87
8	Indole-3-carboxaldehyde C9H7NO	MS2	M-H	116.055	482.17		0		0		0		0	0	0	0		0.15	0.3	0.37	0		0.3		482.2		482.2		482.2		482.2	482.2	482.2	482.2		481.9	481.9	481.9	480.8		480.8		0.93		0.89		0.9		0.87
9	Glutamine; LC-ESI-ITFT; MS2; CE 50.0 eV; [M-H]- C5H10N2O3---Glutamine; LC-ESI-ITFT; MS2; CE 75.0 eV; [M-H]- C5H10N2O3---L-Glutamine [M-H]- C5H10N2O3 NIST 1187709	MS1	M-H	145.062	58.75				3.45	2.68	2.64	6.23	6.86	6.05	12.13	12.8	11.65	30.91	30.3	28.82	60.41	62.43	63.28				58.8	58.8	58.8	58.4	58.4	58.4	58.4	58.4	58.4	58.4	58.4	58.4	58.4	58.4	58.4				0.85	0.76	0.95	0.93	0.96
9	Glutamine; LC-ESI-ITFT; MS2; CE 50.0 eV; [M-H]- C5H10N2O3---Glutamine; LC-ESI-ITFT; MS2; CE 75.0 eV; [M-H]- C5H10N2O3---L-Glutamine [M-H]- C5H10N2O3 NIST 1187709	MS2	M-H	127.054	58.75				0.79	1.14	0.86	0.79	0.98	0.39	1.88	2.87	2.04	5.35	6.1	4.67	7	10.52	10.38				58.8	58.8	58.8	58.4	58.4	58.4	58.4	58.4	58.4	58.4	58.4	58.4	58.4	58.4	58.4				0.85	0.76	0.95	0.93	0.96
9	Glutamine; LC-ESI-ITFT; MS2; CE 50.0 eV; [M-H]- C5H10N2O3---Glutamine; LC-ESI-ITFT; MS2; CE 75.0 eV; [M-H]- C5H10N2O3---L-Glutamine [M-H]- C5H10N2O3 NIST 1187709	MS2	M-H	145.1	58.75				0.08	0.67	1	0.25	0.42	0	1.51	2.3	1.3	2.22	3.11	3.04	3.94	7.56	5.77				58.8	58.8	58.8	58.4	58.4	58.4	58.4	58.4	58.4	58.4	58.4	58.4	58.4	58.4	58.4				0.85	0.76	0.95	0.93	0.96
9	Glutamine; LC-ESI-ITFT; MS2; CE 50.0 eV; [M-H]- C5H10N2O3---Glutamine; LC-ESI-ITFT; MS2; CE 75.0 eV; [M-H]- C5H10N2O3---L-Glutamine [M-H]- C5H10N2O3 NIST 1187709	MS2	M-H	145.062	58.75				0.59	0	0.33	0.67	0.33	0	0.63	3.02	1.51	2.77	3.1	2.06	3.48	5.08	5.21				58.8	58.8	58.8	58.4	58.4	58.4	58.4	58.4	58.4	58.4	58.4	58.4	58.4	58.4	58.4				0.85	0.76	0.95	0.93	0.96
9	Glutamine; LC-ESI-ITFT; MS2; CE 50.0 eV; [M-H]- C5H10N2O3---Glutamine; LC-ESI-ITFT; MS2; CE 75.0 eV; [M-H]- C5H10N2O3---L-Glutamine [M-H]- C5H10N2O3 NIST 1187709	MS2	M-H	109.041	58.75				0.55	0.14	0.36	1.06	0.55	0.65	0.84	1.75	1.73	2.65	3.56	1.93	4.2	8.45	7.83				58.8	58.8	58.8	58.4	58.4	58.4	58.4	58.4	58.4	58.4	58.4	58.4	58.4	58.4	58.4				0.85	0.76	0.95	0.93	0.96
9	Glutamine; LC-ESI-ITFT; MS2; CE 50.0 eV; [M-H]- C5H10N2O3---Glutamine; LC-ESI-ITFT; MS2; CE 75.0 eV; [M-H]- C5H10N2O3---L-Glutamine [M-H]- C5H10N2O3 NIST 1187709	MS2	M-H	128.038	58.75				4.64	3.76	1.46	2.44	2.79	1.42	2.72	4.1	4.06	9.36	14.47	7.62	11.61	19.1	18.19				58.8	58.8	58.8	58.4	58.4	58.4	58.4	58.4	58.4	58.4	58.4	58.4	58.4	58.4	58.4				0.85	0.76	0.95	0.93	0.96
9	Glutamine; LC-ESI-ITFT; MS2; CE 50.0 eV; [M-H]- C5H10N2O3---Glutamine; LC-ESI-ITFT; MS2; CE 75.0 eV; [M-H]- C5H10N2O3---L-Glutamine [M-H]- C5H10N2O3 NIST 1187709	MS2	M-H	84.0463	58.75				0.06	0	0.41	0.67	0.32	0.25	0	0.26	0	1.6	0.8	0.73	2.06	3.87	3.74				58.8	58.8	58.8	58.4	58.4	58.4	58.4	58.4	58.4	58.4	58.4	58.4	58.4	58.4	58.4				0.85	0.76	0.95	0.93	0.96
10	L-Glutamic acid C5H9NO4 MassBank 3086---L-Glutamic acid [M-H]- C5H9NO4 NIST 1188749	MS1	M-H	146.046	57.38				5.07	5.02			2.09	2.25	4.24	3.5	4.77	10.3	9.8	9.59	20.55	18.68	22.14				57.3	57.4			57.4	57.4	57.4	57.4	57.3	57.3	57.3	57.3	57.3	57.3	57.3				0.91	0.92			0.94
10	L-Glutamic acid C5H9NO4 MassBank 3086---L-Glutamic acid [M-H]- C5H9NO4 NIST 1188749	MS2	M-H	146.044	57.38				0.76	0.5			0.25	0	0	0.92	0.42	0.76	1.18	1.98	0.67	3.44	3.31				57.3	57.4			57.4	57.4	57.4	57.4	57.3	57.3	57.3	57.3	57.3	57.3	57.3				0.91	0.92			0.94
10	L-Glutamic acid C5H9NO4 MassBank 3086---L-Glutamic acid [M-H]- C5H9NO4 NIST 1188749	MS2	M-H	102.056	57.38				4.47	2.64			1.58	0.84	0.77	1.94	2.57	4.75	4.08	3.27	3.53	10.12	9.62				57.3	57.4			57.4	57.4	57.4	57.4	57.3	57.3	57.3	57.3	57.3	57.3	57.3				0.91	0.92			0.94
10	L-Glutamic acid C5H9NO4 MassBank 3086---L-Glutamic acid [M-H]- C5H9NO4 NIST 1188749	MS2	M-H	128.036	57.38				4.64	3.76			2.79	1.42	2.72	4.1	4.06	9.36	14.05	7.93	11.44	18.98	18.23				57.3	57.4			57.4	57.4	57.4	57.4	57.3	57.3	57.3	57.3	57.3	57.3	57.3				0.91	0.92			0.94
11	(R,R)-TARTARIC ACID C4H6O6---3-carboxy-2,3-dihydroxypropanoate C4H6O6 MoNA 440055	MS1	M-H	149.009	884.34	307.1	307.15	303.87	313.15	310.79	314.92	304.22	319.59	312.05	304.08	308.87	309.06	291.47	298.83	292.41	284.47	284.11	285.85	884.3	884.3	884.3	884.3	884.3	884.3	884.3	884.3	884.3	884.3	884.3	884.3	884.3	884.3	884.3	884.3	884.3	884.3	0.98	0.98	1	0.99	0.99	0.98	0.98	1
11	(R,R)-TARTARIC ACID C4H6O6---3-carboxy-2,3-dihydroxypropanoate C4H6O6 MoNA 440055	MS2	M-H	72.994	884.34	42.83	55.16	56.47	58.35	60.03	46.92	58.91	58.74	39.24	56.16	44.93	48.49	43.52	50.51	53.95	52.69	49.35	47.86	884.3	884.3	884.3	884.3	884.3	884.3	884.3	884.3	884.3	884.3	884.3	884.3	884.3	884.3	884.3	884.3	884.3	884.3	0.98	0.98	1	0.99	0.99	0.98	0.98	1
11	(R,R)-TARTARIC ACID C4H6O6---3-carboxy-2,3-dihydroxypropanoate C4H6O6 MoNA 440055	MS2	M-H	87.0093	884.34	32.72	40.18	39.27	40.75	46.07	32.57	38.52	33.37	28.87	32.36	29.17	31.77	29.43	34.95	43.66	46.2	32.05	36.22	884.3	884.3	884.3	884.3	884.3	884.3	884.3	884.3	884.3	884.3	884.3	884.3	884.3	884.3	884.3	884.3	884.3	884.3	0.98	0.98	1	0.99	0.99	0.98	0.98	1
11	(R,R)-TARTARIC ACID C4H6O6---3-carboxy-2,3-dihydroxypropanoate C4H6O6 MoNA 440055	MS2	M-H	149.01	884.34	45.32	56.3	47.57	46.93	77.5	43.25	52.1	38.19	34.91	40.78	33.65	33.15	44.95	49.48	58.39	55.07	43.6	51.07	884.3	884.3	884.3	884.3	884.3	884.3	884.3	884.3	884.3	884.3	884.3	884.3	884.3	884.3	884.3	884.3	884.3	884.3	0.98	0.98	1	0.99	0.99	0.98	0.98	1
11	(R,R)-TARTARIC ACID C4H6O6---3-carboxy-2,3-dihydroxypropanoate C4H6O6 MoNA 440055	MS2	M-H	59.0153	884.34	16.58	18.59	17.72	20.73	19.76	18.54	21.32	20.7	17.15	18.3	17.32	16.84	15.79	15.94	17.26	22.01	15.35	17.65	884.3	884.3	884.3	884.3	884.3	884.3	884.3	884.3	884.3	884.3	884.3	884.3	884.3	884.3	884.3	884.3	884.3	884.3	0.98	0.98	1	0.99	0.99	0.98	0.98	1
11	(R,R)-TARTARIC ACID C4H6O6---3-carboxy-2,3-dihydroxypropanoate C4H6O6 MoNA 440055	MS2	M-H	103.005	884.34	5.05	7.74	7.14	4.95	8.99	6.93	7.66	6.66	3.92	4.67	4.84	3.64	6.61	6.3	8.1	8.43	0	8.79	884.3	884.3	884.3	884.3	884.3	884.3	884.3	884.3	884.3	884.3	884.3	884.3	884.3	884.3	884.3	884.3	884.3	884.3	0.98	0.98	1	0.99	0.99	0.98	0.98	1
11	(R,R)-TARTARIC ACID C4H6O6---3-carboxy-2,3-dihydroxypropanoate C4H6O6 MoNA 440055	MS2	M-H	75.0135	884.34	1.81	3.71	4.25	3.73	4.01	4.07	3.08	2.26	4.67	4.55	3.41	1.87	4.39	3.79	3.89	5.11	0	3.46	884.3	884.3	884.3	884.3	884.3	884.3	884.3	884.3	884.3	884.3	884.3	884.3	884.3	884.3	884.3	884.3	884.3	884.3	0.98	0.98	1	0.99	0.99	0.98	0.98	1
12	Unknown (carbon number 5); PlaSMA ID-102 C5H4N4O2---Xanthine C5H4N4O2 MoNA 440035	MS1	M-H	151.026	98.21	12.82	13.38	12.13	29.06	31.91	32.27	65.54	61.12	65.38	126.43	122	124.34	301.71	296.61	304.67	558.81	564.51	567.86	98	98	98	98	98	98	98	98	96.9	98	98	98	98	98	98	98	98	98	0.97	0.97	0.98	0.99	0.99	0.99	0.98	0.99
12	Unknown (carbon number 5); PlaSMA ID-102 C5H4N4O2---Xanthine C5H4N4O2 MoNA 440035	MS2	M-H	151.027	98.21	4.41	3.81	6.7	13.98	20.67	14.94	31.92	21.72	26.38	94.83	40.27	74.11	120.55	95.54	168.2	273.62	388.06	270.31	98	98	98	98	98	98	98	98	96.9	98	98	98	98	98	98	98	98	98	0.97	0.97	0.98	0.99	0.99	0.99	0.98	0.99
12	Unknown (carbon number 5); PlaSMA ID-102 C5H4N4O2---Xanthine C5H4N4O2 MoNA 440035	MS2	M-H	108.021	98.21	5.9	6.46	5.48	12.12	13.28	16.1	22.94	21.32	15.07	56.91	36.82	42.55	102.03	78.29	101.91	228.36	234.91	199.48	98	98	98	98	98	98	98	98	96.9	98	98	98	98	98	98	98	98	98	0.97	0.97	0.98	0.99	0.99	0.99	0.98	0.99
12	Unknown (carbon number 5); PlaSMA ID-102 C5H4N4O2---Xanthine C5H4N4O2 MoNA 440035	MS2	M-H	65.9986	98.21	0.68	0.23	0.71	0.45	0.11	0.71	1.47	1.5	1.27	1.53	2.54	2.69	2.31	4.17	4.37	6.23	9.96	11.12	98	98	98	98	98	98	98	98	96.9	98	98	98	98	98	98	98	98	98	0.97	0.97	0.98	0.99	0.99	0.99	0.98	0.99
12	Unknown (carbon number 5); PlaSMA ID-102 C5H4N4O2---Xanthine C5H4N4O2 MoNA 440035	MS2	M-H	80.0265	98.21	0.12	0.5	0	0.4	0.81	1.12	1.81	1.25	1.03	2.21	0.96	2.53	5.42	5.31	4.02	9.54	10.66	8.36	98	98	98	98	98	98	98	98	96.9	98	98	98	98	98	98	98	98	98	0.97	0.97	0.98	0.99	0.99	0.99	0.98	0.99
12	Unknown (carbon number 5); PlaSMA ID-102 C5H4N4O2---Xanthine C5H4N4O2 MoNA 440035	MS2	M-H	133.017	98.21	0	0	0.88	0.28	0.96	0	1.97	0.96	0.72	3.01	1.81	2.85	5.37	5.36	5.3	13.02	10.99	12.42	98	98	98	98	98	98	98	98	96.9	98	98	98	98	98	98	98	98	98	0.97	0.97	0.98	0.99	0.99	0.99	0.98	0.99
12	Unknown (carbon number 5); PlaSMA ID-102 C5H4N4O2---Xanthine C5H4N4O2 MoNA 440035	MS2	M-H	107.69	98.21	0	0	0	0	0	0	0	0	0	0.65	0	0	0.29	0.29	0.65	1.52	1.08	1.22	98	98	98	98	98	98	98	98	96.9	98	98	98	98	98	98	98	98	98	0.97	0.97	0.98	0.99	0.99	0.99	0.98	0.99
13	P-Anisic acid C8H8O3	MS1	M-H	151.04	505.35	4.98	5.91		5.3	5.43	5.72	5.87	5.45	5.7	7.92	9.01	7.96	17.2	18.06	14.96	24.73	28.14	29.3	505.4	505.4		506.1	505	505	506.1	505	506.1	505	506.1	505	505	505	505	505	505	505	0.94	0.9		0.93	0.91	0.94	0.95	0.96
13	P-Anisic acid C8H8O3	MS2	M-H	92.0272	505.35	4.58	3.04		3.59	2.5	2.97	3.81	4.11	5.18	6.18	6.28	7.55	9.46	10.59	9.7	25.04	20.15	13.63	505.4	505.4		506.1	505	505	506.1	505	506.1	505	506.1	505	505	505	505	505	505	505	0.94	0.9		0.93	0.91	0.94	0.95	0.96
13	P-Anisic acid C8H8O3	MS2	M-H	151.042	505.35	2.65	3.6		2.86	2.44	1.62	2.87	1.92	1.71	3.21	0.51	3.56	9.77	6.29	6.29	8.99	8.83	9.07	505.4	505.4		506.1	505	505	506.1	505	506.1	505	506.1	505	505	505	505	505	505	505	0.94	0.9		0.93	0.91	0.94	0.95	0.96
13	P-Anisic acid C8H8O3	MS2	M-H	136.016	505.35	4.51	2.8		3.12	1.75	2.68	3.05	2.28	1.95	2.76	1.83	4.02	5.7	6.17	5.29	9.35	9.26	8.17	505.4	505.4		506.1	505	505	506.1	505	506.1	505	506.1	505	505	505	505	505	505	505	0.94	0.9		0.93	0.91	0.94	0.95	0.96
13	P-Anisic acid C8H8O3	MS2	M-H	132.927	505.35	0.96	0		0.08	0.88	1.2	0.64	0	0	0	0	0	0	0	0.24	0	0.16	0.56	505.4	505.4		506.1	505	505	506.1	505	506.1	505	506.1	505	505	505	505	505	505	505	0.94	0.9		0.93	0.91	0.94	0.95	0.96
13	P-Anisic acid C8H8O3	MS2	M-H	108.023	505.35	2.67	2.69		1.7	0	1.45	0.72	0.72	1.37	1.52	1.01	2.45	2.61	2.78	1.42	1.74	3.18	1.34	505.4	505.4		506.1	505	505	506.1	505	506.1	505	506.1	505	505	505	505	505	505	505	0.94	0.9		0.93	0.91	0.94	0.95	0.96
13	P-Anisic acid C8H8O3	MS2	M-H	95.0144	505.35	0	0		0.61	0	0	0	0	0	0.34	0	0.54	0	0	0	0.41	0.58	0.07	505.4	505.4		506.1	505	505	506.1	505	506.1	505	506.1	505	505	505	505	505	505	505	0.94	0.9		0.93	0.91	0.94	0.95	0.96
14	L-(-)-Phenylalanine; LC-ESI-QTOF; MS2; CE C9H11NO2	MS1	M-H	164.071	185.75	6.03	4.64	5.54	15.89	13.34	14.21	31.51	30.03	30.43	63.78	62.4	65.31	162.53	154.94	156.49	307.49	303.58	301.1	186	185.8	186	184.9	184.9	184.9	186	186	183.8	184.9	184.9	186	186	184.9	186	186	184.9	184.9	0.99	1	0.91	0.98	0.97	0.96	0.99	0.97
14	L-(-)-Phenylalanine; LC-ESI-QTOF; MS2; CE C9H11NO2	MS2	M-H	147.046	185.75	2.15	1.56	1.1	5.25	4.91	4.43	8.51	6.11	6.72	34.41	16.38	19.08	61.09	32.21	54.3	102.63	88.28	77.62	186	185.8	186	184.9	184.9	184.9	186	186	183.8	184.9	184.9	186	186	184.9	186	186	184.9	184.9	0.99	1	0.91	0.98	0.97	0.96	0.99	0.97
14	L-(-)-Phenylalanine; LC-ESI-QTOF; MS2; CE C9H11NO2	MS2	M-H	103.057	185.75	1.59	1.56	0.99	3.04	1.84	1.94	4.56	2.37	4.14	10.03	6.01	8.41	25.48	17.97	19.83	49.77	47.46	42.5	186	185.8	186	184.9	184.9	184.9	186	186	183.8	184.9	184.9	186	186	184.9	186	186	184.9	184.9	0.99	1	0.91	0.98	0.97	0.96	0.99	0.97
14	L-(-)-Phenylalanine; LC-ESI-QTOF; MS2; CE C9H11NO2	MS2	M-H	164.074	185.75	1.2	0.62	0	3.04	2.19	2.23	2.41	2.95	4.77	14.07	5.8	11.3	21.16	21.18	26.85	65.5	36.74	28	186	185.8	186	184.9	184.9	184.9	186	186	183.8	184.9	184.9	186	186	184.9	186	186	184.9	184.9	0.99	1	0.91	0.98	0.97	0.96	0.99	0.97
14	L-(-)-Phenylalanine; LC-ESI-QTOF; MS2; CE C9H11NO2	MS2	M-H	72.0083	185.75	0.56	1.83	0.5	1.12	0.41	0.84	2.71	0.82	2.87	4.17	2.9	4.05	8.19	5.34	8.85	22.69	22.42	16.53	186	185.8	186	184.9	184.9	184.9	186	186	183.8	184.9	184.9	186	186	184.9	186	186	184.9	184.9	0.99	1	0.91	0.98	0.97	0.96	0.99	0.97
15	Glycerophosphate(2) C3H9O6P	MS1	M-H	171.006	57.5						0.97	3.23		2.71	5.91	8.67	6.51	16.63	20.39	18.09	37.6	37.19	40.86						57.5	57.5		57.5	57.3	57.3	57.3	57.3	57.3	57.3	57.3	57.3	57.3						0.98	1
15	Glycerophosphate(2) C3H9O6P	MS2	M-H	78.9593	57.5						7.58	9.6		7.64	13.33	16.87	15.66	44.36	44.2	46.75	100.96	105.82	106.13						57.5	57.5		57.5	57.3	57.3	57.3	57.3	57.3	57.3	57.3	57.3	57.3						0.98	1
15	Glycerophosphate(2) C3H9O6P	MS2	M-H	96.9711	57.5						2.02	2.26		1.23	2.98	3.12	2.77	5.76	6.13	8.54	13.3	17.54	11.2						57.5	57.5		57.5	57.3	57.3	57.3	57.3	57.3	57.3	57.3	57.3	57.3						0.98	1
16	Aconitic acid; PlaSMA ID-169 C6H6O6---cis-Aconitic acid C6H6O6 MoNA 439177	MS1	M-H	173.009	891.7	93.35	92.05	88.84	91.88	89.69	96.34	93.27	92.18	91.15	87.66	92.5	88.03	81.34	86.17	87.18	82.26	80.48	83.19	891.7	891.7	891.7	891.7	891.7	891.7	891.7	891.7	891.7	891.7	891.7	891.7	891.7	891.7	891.7	891.7	891.7	891.7	0.84	0.81	0.83	0.81	0.82	0.84	0.84	0.82
16	Aconitic acid; PlaSMA ID-169 C6H6O6---cis-Aconitic acid C6H6O6 MoNA 439177	MS2	M-H	85.0321	891.7	101.22	84.77	108.76	107.07	98.86	95.18	85.98	93.98	98.14	89.07	76.84	72.5	80.96	77.06	77.46	50.99	83.35	80.93	891.7	891.7	891.7	891.7	891.7	891.7	891.7	891.7	891.7	891.7	891.7	891.7	891.7	891.7	891.7	891.7	891.7	891.7	0.84	0.81	0.83	0.81	0.82	0.84	0.84	0.82
16	Aconitic acid; PlaSMA ID-169 C6H6O6---cis-Aconitic acid C6H6O6 MoNA 439177	MS2	M-H	111.009	891.7	663.21	561.41	596.83	671.96	626.6	580.13	601.88	538.46	635.08	504.54	503.92	490.73	521.35	448.97	507.88	406.15	547.05	488.51	891.7	891.7	891.7	891.7	891.7	891.7	891.7	891.7	891.7	891.7	891.7	891.7	891.7	891.7	891.7	891.7	891.7	891.7	0.84	0.81	0.83	0.81	0.82	0.84	0.84	0.82
16	Aconitic acid; PlaSMA ID-169 C6H6O6---cis-Aconitic acid C6H6O6 MoNA 439177	MS2	M-H	80.9709	891.7	16.79	20.12	16.64	16.51	20.06	20.05	17.43	20.05	17.11	21.08	18.18	18.18	16.83	18.46	17.25	19.89	16.81	15.17	891.7	891.7	891.7	891.7	891.7	891.7	891.7	891.7	891.7	891.7	891.7	891.7	891.7	891.7	891.7	891.7	891.7	891.7	0.84	0.81	0.83	0.81	0.82	0.84	0.84	0.82
16	Aconitic acid; PlaSMA ID-169 C6H6O6---cis-Aconitic acid C6H6O6 MoNA 439177	MS2	M-H	100.978	891.7	51.93	46.25	45.44	49.65	40.27	42.45	49.89	47.27	41.49	48.47	45.53	48.26	45.15	42.27	45.85	39.16	39.1	38.58	891.7	891.7	891.7	891.7	891.7	891.7	891.7	891.7	891.7	891.7	891.7	891.7	891.7	891.7	891.7	891.7	891.7	891.7	0.84	0.81	0.83	0.81	0.82	0.84	0.84	0.82
17	L-Arginine [M-H]- C6H14N4O2 NIST 1188947---L-Arginine [M-H]- C6H14N4O2 NIST 1188948	MS1	M-H	173.104	60.2									9.47				45.66	45.6	44.59	92.31	91.78	92.37									60.6				60.6	60.6	60.6	60.6	60.6	60.6
17	L-Arginine [M-H]- C6H14N4O2 NIST 1188947---L-Arginine [M-H]- C6H14N4O2 NIST 1188948	MS2	M-H	131.082	60.2									10.55				57.06	38.78	63.78	76.47	131.35	90.26									60.6				60.6	60.6	60.6	60.6	60.6	60.6
17	L-Arginine [M-H]- C6H14N4O2 NIST 1188947---L-Arginine [M-H]- C6H14N4O2 NIST 1188948	MS2	M-H	156.075	60.2									0.13				1.88	1.13	1.13	1.21	2.74	1.35									60.6				60.6	60.6	60.6	60.6	60.6	60.6
17	L-Arginine [M-H]- C6H14N4O2 NIST 1188947---L-Arginine [M-H]- C6H14N4O2 NIST 1188948	MS2	M-H	113.071	60.2									0				0	0	0	0.15	0.07	0.52									60.6				60.6	60.6	60.6	60.6	60.6	60.6
18	L-METHIONINE SULFOXIMINE C5H12N2O3S	MS1	M-H	179.052	58.86				2.13	3.02	3.85	6.36	6.04	5.62	14.8	15.85	14.81	40.37	40.13	38.14	87.19	88.62	90.31				58.9	58.9	58.9	59.5	58.4	58.4	59.5	59.5	59.5	59.5	59.5	59.5	59.5	59.5	59.5				0.85	0.86	0.86	0.88	0.92
18	L-METHIONINE SULFOXIMINE C5H12N2O3S	MS2	M-H	134.986	58.86				192.72	211.26	244.1	68.57	63.17	42.08	50.93	61.38	60.29	73.66	65.46	79.56	37.43	65.14	48.96				58.9	58.9	58.9	59.5	58.4	58.4	59.5	59.5	59.5	59.5	59.5	59.5	59.5	59.5	59.5				0.85	0.86	0.86	0.88	0.92
18	L-METHIONINE SULFOXIMINE C5H12N2O3S	MS2	M-H	78.0023	58.86				2.28	3.18	2.97	4.09	3.32	3.23	4.62	5.64	5.3	12.68	7.91	18.59	20.09	26.09	14.54				58.9	58.9	58.9	59.5	58.4	58.4	59.5	59.5	59.5	59.5	59.5	59.5	59.5	59.5	59.5				0.85	0.86	0.86	0.88	0.92
18	L-METHIONINE SULFOXIMINE C5H12N2O3S	MS2	M-H	61.9714	58.86				1.94	1.04	0.71	2.41	1.86	1.86	2.66	3.53	3.4	10.4	6.14	7.56	16.66	12.66	16.82				58.9	58.9	58.9	59.5	58.4	58.4	59.5	59.5	59.5	59.5	59.5	59.5	59.5	59.5	59.5				0.85	0.86	0.86	0.88	0.92
18	L-METHIONINE SULFOXIMINE C5H12N2O3S	MS2	M-H	90.9985	58.86				83.87	77.5	91.7	34.32	39.88	21.17	27.44	32.24	26.17	34.09	27.28	33.92	22.83	30.95	18.68				58.9	58.9	58.9	59.5	58.4	58.4	59.5	59.5	59.5	59.5	59.5	59.5	59.5	59.5	59.5				0.85	0.86	0.86	0.88	0.92
18	L-METHIONINE SULFOXIMINE C5H12N2O3S	MS2	M-H	59.0166	58.86				4.68	4.4	6.4	3.54	3.58	1.95	4.18	3.97	3.84	10.91	7.13	7.64	12.78	16.68	12.58				58.9	58.9	58.9	59.5	58.4	58.4	59.5	59.5	59.5	59.5	59.5	59.5	59.5	59.5	59.5				0.85	0.86	0.86	0.88	0.92
18	L-METHIONINE SULFOXIMINE C5H12N2O3S	MS2	M-H	178.97	58.86				20.02	29.57	42.2	5.73	7.03	5.98	5.85	10.01	12.6	6.97	3.7	12.11	2.78	13.2	6.3				58.9	58.9	58.9	59.5	58.4	58.4	59.5	59.5	59.5	59.5	59.5	59.5	59.5	59.5	59.5				0.85	0.86	0.86	0.88	0.92
19	Theophylline C7H8N4O2---Theophylline C7H8N4O2 MoNA 436749	MS1	M-H	179.058	328.23	59.62	53.05	59.46	143.22	143.37	139.39	279.68	285.05	274.61	529.71	535.73	510.38	1248.99	1230.73	1244.26	2464.62	2322.34	2362.48	327.9	327.9	327.9	327.9	327.9	327.9	327.9	327.9	327.9	327.9	327.9	327.9	327.9	327.9	327.9	327.9	327.9	327.9	0.99	0.99	1	0.99	0.99	1	0.96	0.99
19	Theophylline C7H8N4O2---Theophylline C7H8N4O2 MoNA 436749	MS2	M-H	179.058	328.23	47.28	35.76	36.66	152.11	121.66	113.19	197.68	334.96	221.54	625.17	607.36	346.66	1423.35	851.78	1153.54	2145.53	2776.45	2571.1	327.9	327.9	327.9	327.9	327.9	327.9	327.9	327.9	327.9	327.9	327.9	327.9	327.9	327.9	327.9	327.9	327.9	327.9	0.99	0.99	1	0.99	0.99	1	0.96	0.99
19	Theophylline C7H8N4O2---Theophylline C7H8N4O2 MoNA 436749	MS2	M-H	164.034	328.23	32.81	28.09	42.49	107.36	89.68	73.9	108.14	227.5	209.94	485.91	500.57	376.15	1036.25	973.89	849.4	1607.47	1833.18	2270.52	327.9	327.9	327.9	327.9	327.9	327.9	327.9	327.9	327.9	327.9	327.9	327.9	327.9	327.9	327.9	327.9	327.9	327.9	0.99	0.99	1	0.99	0.99	1	0.96	0.99
19	Theophylline C7H8N4O2---Theophylline C7H8N4O2 MoNA 436749	MS2	M-H	122.036	328.23	13.46	11.94	18.66	40.98	38.57	34.18	56.37	96.93	93.66	198	216.33	171.67	405.36	461.89	349.77	675.16	796.69	950.45	327.9	327.9	327.9	327.9	327.9	327.9	327.9	327.9	327.9	327.9	327.9	327.9	327.9	327.9	327.9	327.9	327.9	327.9	0.99	0.99	1	0.99	0.99	1	0.96	0.99
19	Theophylline C7H8N4O2---Theophylline C7H8N4O2 MoNA 436749	MS2	M-H	135.007	328.23	2.82	5.45	4.97	11.6	12.79	8.33	16.2	21.85	19.19	43.36	62.41	42.75	81.21	107.77	115.9	120.88	117.68	182.71	327.9	327.9	327.9	327.9	327.9	327.9	327.9	327.9	327.9	327.9	327.9	327.9	327.9	327.9	327.9	327.9	327.9	327.9	0.99	0.99	1	0.99	0.99	1	0.96	0.99
19	Theophylline C7H8N4O2---Theophylline C7H8N4O2 MoNA 436749	MS2	M-H	135.031	328.23	5.26	4.81	6.34	10.14	10.21	7.34	25.04	17.9	26.56	46.33	52.99	60.9	94.53	152.91	105.1	123.3	273.2	140.99	327.9	327.9	327.9	327.9	327.9	327.9	327.9	327.9	327.9	327.9	327.9	327.9	327.9	327.9	327.9	327.9	327.9	327.9	0.99	0.99	1	0.99	0.99	1	0.96	0.99
19	Theophylline C7H8N4O2---Theophylline C7H8N4O2 MoNA 436749	MS2	M-H	94.0406	328.23	0.91	1.28	2.43	5.61	6.86	6.67	9.12	10.87	10.12	27.22	26.98	28.53	41.41	82.29	50.71	101.79	102.78	123.23	327.9	327.9	327.9	327.9	327.9	327.9	327.9	327.9	327.9	327.9	327.9	327.9	327.9	327.9	327.9	327.9	327.9	327.9	0.99	0.99	1	0.99	0.99	1	0.96	0.99
20	3-Hydroxyphenylalanine C9H11NO3---L-Tyrosine [M-H]- C9H11NO3 NIST 1187846	MS1	M-H	180.066	92.63	7.97	7.8	8.01	17.39	20.33	18.81	40.64	40.72	41.51	77.84	80.11	77.44	196.29	199.69	196.11	395.44	389.31	384.29	92.5	92.5	92.5	92.5	92.5	92.5	92.5	92.5	91.4	92.5	92.5	92.5	92.5	92.5	92.5	92.5	92.5	92.5	0.85	0.92	0.95	0.98	0.97	0.94	0.96	0.96
20	3-Hydroxyphenylalanine C9H11NO3---L-Tyrosine [M-H]- C9H11NO3 NIST 1187846	MS2	M-H	119.05	92.63	1.59	0.61	0.83	2.59	3.95	1.41	6.93	9.39	5.72	13.22	7.63	12.79	29.34	43.94	36.72	50.18	65.51	56.19	92.5	92.5	92.5	92.5	92.5	92.5	92.5	92.5	91.4	92.5	92.5	92.5	92.5	92.5	92.5	92.5	92.5	92.5	0.85	0.92	0.95	0.98	0.97	0.94	0.96	0.96
20	3-Hydroxyphenylalanine C9H11NO3---L-Tyrosine [M-H]- C9H11NO3 NIST 1187846	MS2	M-H	180.069	92.63	2.33	1.83	2.34	4.18	3.96	1.54	6.11	13.1	4.44	21.3	10.45	13.32	33.39	37.78	50.7	52.47	67.35	34.12	92.5	92.5	92.5	92.5	92.5	92.5	92.5	92.5	91.4	92.5	92.5	92.5	92.5	92.5	92.5	92.5	92.5	92.5	0.85	0.92	0.95	0.98	0.97	0.94	0.96	0.96
20	3-Hydroxyphenylalanine C9H11NO3---L-Tyrosine [M-H]- C9H11NO3 NIST 1187846	MS2	M-H	163.04	92.63	0	2.98	0.85	3.7	5.3	2.54	5.38	8.89	6.1	19.67	9.27	14.33	32.52	42.25	49.03	64.8	74.09	34.65	92.5	92.5	92.5	92.5	92.5	92.5	92.5	92.5	91.4	92.5	92.5	92.5	92.5	92.5	92.5	92.5	92.5	92.5	0.85	0.92	0.95	0.98	0.97	0.94	0.96	0.96
20	3-Hydroxyphenylalanine C9H11NO3---L-Tyrosine [M-H]- C9H11NO3 NIST 1187846	MS2	M-H	72.0077	92.63	0.88	1.04	0.18	1.24	1.47	1.15	1.06	0.86	0.77	3.39	1.75	1.3	6.25	8.55	8.59	5.88	12.29	10.43	92.5	92.5	92.5	92.5	92.5	92.5	92.5	92.5	91.4	92.5	92.5	92.5	92.5	92.5	92.5	92.5	92.5	92.5	0.85	0.92	0.95	0.98	0.97	0.94	0.96	0.96
20	3-Hydroxyphenylalanine C9H11NO3---L-Tyrosine [M-H]- C9H11NO3 NIST 1187846	MS2	M-H	93.0323	92.63	0	0.27	0	0.07	0.4	0.8	1.31	0.97	1.31	2.15	1.14	2.12	4.78	6.17	6.64	6.28	11.31	3.86	92.5	92.5	92.5	92.5	92.5	92.5	92.5	92.5	91.4	92.5	92.5	92.5	92.5	92.5	92.5	92.5	92.5	92.5	0.85	0.92	0.95	0.98	0.97	0.94	0.96	0.96
20	3-Hydroxyphenylalanine C9H11NO3---L-Tyrosine [M-H]- C9H11NO3 NIST 1187846	MS2	M-H	134.07	92.63	0	0	0	0	0	0	0	0	0	0.4	0.56	0	0	0	1.86	1.25	2.06	1.89	92.5	92.5	92.5	92.5	92.5	92.5	92.5	92.5	91.4	92.5	92.5	92.5	92.5	92.5	92.5	92.5	92.5	92.5	0.85	0.92	0.95	0.98	0.97	0.94	0.96	0.96
21	1-Hydroxy-2-naphthoic acid [M-H]- C11H8O3 NIST 1198761	MS1	M-H	187.04	521.42								2.48		4.75	5.83	5.68	11.45	14.14	16.33	36.25	41.29	38.68								521.4		521.4	521.4	521.4	521.4	521.4	516	519.3	520.4	519.3								0.64
21	1-Hydroxy-2-naphthoic acid [M-H]- C11H8O3 NIST 1198761	MS2	M-H	143.052	521.42								10.18		15.18	19.02	16.46	32.32	33.67	46.13	82.35	96.03	96.06								521.4		521.4	521.4	521.4	521.4	521.4	516	519.3	520.4	519.3								0.64
21	1-Hydroxy-2-naphthoic acid [M-H]- C11H8O3 NIST 1198761	MS2	M-H	187.037	521.42								0		0	0	0	0	5.43	5.24	11.3	13.99	14.44								521.4		521.4	521.4	521.4	521.4	521.4	516	519.3	520.4	519.3								0.64
21	1-Hydroxy-2-naphthoic acid [M-H]- C11H8O3 NIST 1198761	MS2	M-H	118.942	521.42								15.39		14.45	14.6	11.32	16.26	12.65	20.98	18.27	27.88	24.13								521.4		521.4	521.4	521.4	521.4	521.4	516	519.3	520.4	519.3								0.64
21	1-Hydroxy-2-naphthoic acid [M-H]- C11H8O3 NIST 1198761	MS2	M-H	115.061	521.42								0		0.89	0	0	0.6	0	0	1.82	2.39	2.94								521.4		521.4	521.4	521.4	521.4	521.4	516	519.3	520.4	519.3								0.64
21	1-Hydroxy-2-naphthoic acid [M-H]- C11H8O3 NIST 1198761	MS2	M-H	150.899	521.42								1.53		0.77	1.62	0	1.37	0	4.18	0	1.96	2.3								521.4		521.4	521.4	521.4	521.4	521.4	516	519.3	520.4	519.3								0.64
21	1-Hydroxy-2-naphthoic acid [M-H]- C11H8O3 NIST 1198761	MS2	M-H	89.0265	521.42								0		0	0	1.8	2.92	3.62	3.35	2.03	5.27	2.92								521.4		521.4	521.4	521.4	521.4	521.4	516	519.3	520.4	519.3								0.64
22	4-Hydroxyquinoline C9H7NO---Indole-3-carboxaldehyde C9H7NO	MS1	M+HCOO	190.05	170.49														2.88	2.53	8.09	6.79															170.5	170.6	170.6	169.5
22	4-Hydroxyquinoline C9H7NO---Indole-3-carboxaldehyde C9H7NO	MS2	M+HCOO	144.046	170.49														15.5	9.5	21.87	16.95															170.5	170.6	170.6	169.5
22	4-Hydroxyquinoline C9H7NO---Indole-3-carboxaldehyde C9H7NO	MS2	M+HCOO	110.024	170.49														3.61	0.29	2	1.75															170.5	170.6	170.6	169.5
22	4-Hydroxyquinoline C9H7NO---Indole-3-carboxaldehyde C9H7NO	MS2	M+HCOO	92.0527	170.49														0	0	0.67	0.07															170.5	170.6	170.6	169.5
22	4-Hydroxyquinoline C9H7NO---Indole-3-carboxaldehyde C9H7NO	MS2	M+HCOO	58.0294	170.49														0	0.05	0	0															170.5	170.6	170.6	169.5
22	4-Hydroxyquinoline C9H7NO---Indole-3-carboxaldehyde C9H7NO	MS2	M+HCOO	130.012	170.49														0	0.75	0.16	0															170.5	170.6	170.6	169.5
22	4-Hydroxyquinoline C9H7NO---Indole-3-carboxaldehyde C9H7NO	MS2	M+HCOO	116.056	170.49														0.67	0.07	1.09	0.15															170.5	170.6	170.6	169.5
23	CITRATE C6H8O7---Citric acid C6H8O7---Citric acid C6H8O7 MoNA 440017	MS1	M-H	191.019	884.14	1270.99	1250.49	1237.37	1258.93	1223.83	1254.65	1229.78	1266.43	1207.87	1185.88	1198.26	1191.7	1119.69	1140.91	1108.56	1084.29	1071.42	1087.17	884.1	884.1	884.1	884.1	884.1	884.1	884.1	884.1	884.1	884.1	884.1	884.1	884.1	884.1	884.1	884.1	884.1	884.1	0.98	0.98	0.97	0.98	0.99	0.98	0.98	0.98
23	CITRATE C6H8O7---Citric acid C6H8O7---Citric acid C6H8O7 MoNA 440017	MS2	M-H	111.009	884.14	865.1	1015.51	1106.2	1172.27	1366.52	1461.02	1331.45	1427.25	1033.45	1105.39	1031.85	949.76	1113.26	1150.88	1187.23	947.02	1011.57	1120.25	884.1	884.1	884.1	884.1	884.1	884.1	884.1	884.1	884.1	884.1	884.1	884.1	884.1	884.1	884.1	884.1	884.1	884.1	0.98	0.98	0.97	0.98	0.99	0.98	0.98	0.98
23	CITRATE C6H8O7---Citric acid C6H8O7---Citric acid C6H8O7 MoNA 440017	MS2	M-H	87.0079	884.14	246.88	266.14	338.02	308.29	413.68	395.13	368.85	390.04	322.09	342.7	336.3	289.83	328.8	336.25	360.54	241.1	277.98	369.73	884.1	884.1	884.1	884.1	884.1	884.1	884.1	884.1	884.1	884.1	884.1	884.1	884.1	884.1	884.1	884.1	884.1	884.1	0.98	0.98	0.97	0.98	0.99	0.98	0.98	0.98
23	CITRATE C6H8O7---Citric acid C6H8O7---Citric acid C6H8O7 MoNA 440017	MS2	M-H	85.0294	884.14	106.56	110.28	137.44	114.84	149.84	172.17	153.15	154.72	128	128.93	123.03	98.53	120.16	120.72	153.29	82.27	106.04	137.7	884.1	884.1	884.1	884.1	884.1	884.1	884.1	884.1	884.1	884.1	884.1	884.1	884.1	884.1	884.1	884.1	884.1	884.1	0.98	0.98	0.97	0.98	0.99	0.98	0.98	0.98
23	CITRATE C6H8O7---Citric acid C6H8O7---Citric acid C6H8O7 MoNA 440017	MS2	M-H	129.019	884.14	26.47	30.85	32.21	33.24	51.18	59.75	43.98	54.86	32.52	35.78	31.38	25.22	34.15	39.36	43.21	36.69	37.01	35.88	884.1	884.1	884.1	884.1	884.1	884.1	884.1	884.1	884.1	884.1	884.1	884.1	884.1	884.1	884.1	884.1	884.1	884.1	0.98	0.98	0.97	0.98	0.99	0.98	0.98	0.98
23	CITRATE C6H8O7---Citric acid C6H8O7---Citric acid C6H8O7 MoNA 440017	MS2	M-H	57.0326	884.14	52.14	56.48	58.58	64.04	65.06	64.81	54.78	65.23	73.84	64.15	56.51	61.22	58.81	52.28	61.61	43.74	52.66	63.06	884.1	884.1	884.1	884.1	884.1	884.1	884.1	884.1	884.1	884.1	884.1	884.1	884.1	884.1	884.1	884.1	884.1	884.1	0.98	0.98	0.97	0.98	0.99	0.98	0.98	0.98
23	CITRATE C6H8O7---Citric acid C6H8O7---Citric acid C6H8O7 MoNA 440017	MS2	M-H	130.995	884.14	15.27	16.13	15.52	18.12	18.44	27.76	20.74	20.44	17.61	15.36	17.02	13.09	16.33	16.02	17.52	17.44	16.19	15.01	884.1	884.1	884.1	884.1	884.1	884.1	884.1	884.1	884.1	884.1	884.1	884.1	884.1	884.1	884.1	884.1	884.1	884.1	0.98	0.98	0.97	0.98	0.99	0.98	0.98	0.98
24	(2-Naphthalenyloxy)acetic acid C12H10O3 MoNA 436879	MS1	M-H	201.055	482.57	7.98	7.88	8.97	9.49	8.77	8.28	8.53	7.97	8.81	7.88	8.34	8.16	9.14	8.41	8.76	9.1	8.64	9.41	481.9	481.9	481.9	481.9	483	481.9	481.9	481.9	483	481.9	481.9	481.9	483	483	481.9	481.9	481.9	483	0.98	0.98	0.97	0.98	0.96	0.98	0.97	0.97
24	(2-Naphthalenyloxy)acetic acid C12H10O3 MoNA 436879	MS2	M-H	143.05	482.57	49.47	51.91	45.85	46.6	40.98	44.48	49.78	47.02	52.1	41.46	56.46	46.03	58.72	64.82	37.68	56.76	52.4	41.2	481.9	481.9	481.9	481.9	483	481.9	481.9	481.9	483	481.9	481.9	481.9	483	483	481.9	481.9	481.9	483	0.98	0.98	0.97	0.98	0.96	0.98	0.97	0.97
24	(2-Naphthalenyloxy)acetic acid C12H10O3 MoNA 436879	MS2	M-H	115.057	482.57	0.97	2.06	2.16	2.24	2.61	1.98	1.53	1.23	2.24	1.35	1.72	2.17	3.21	2.47	1.57	2.92	2.01	1.46	481.9	481.9	481.9	481.9	483	481.9	481.9	481.9	483	481.9	481.9	481.9	483	483	481.9	481.9	481.9	483	0.98	0.98	0.97	0.98	0.96	0.98	0.97	0.97
24	(2-Naphthalenyloxy)acetic acid C12H10O3 MoNA 436879	MS2	M-H	116.952	482.57	10.41	8.81	11.07	7.37	14.7	10.73	8.58	13.2	16.23	10.72	14.95	12.32	15.48	14.68	9.34	10.4	10.21	12.05	481.9	481.9	481.9	481.9	483	481.9	481.9	481.9	483	481.9	481.9	481.9	483	483	481.9	481.9	481.9	483	0.98	0.98	0.97	0.98	0.96	0.98	0.97	0.97
24	(2-Naphthalenyloxy)acetic acid C12H10O3 MoNA 436879	MS2	M-H	93.035	482.57	0	0.33	1.74	0	1.07	0	0	0	0	1.52	1.01	0.87	1.11	2.19	1.04	0.94	0	1.14	481.9	481.9	481.9	481.9	483	481.9	481.9	481.9	483	481.9	481.9	481.9	483	483	481.9	481.9	481.9	483	0.98	0.98	0.97	0.98	0.96	0.98	0.97	0.97
24	(2-Naphthalenyloxy)acetic acid C12H10O3 MoNA 436879	MS2	M-H	157.067	482.57	0.39	0.65	0	0.78	0	0.7	0	0.7	0	0.61	1.31	1.13	0	0.13	0	0.26	0.22	0	481.9	481.9	481.9	481.9	483	481.9	481.9	481.9	483	481.9	481.9	481.9	483	483	481.9	481.9	481.9	483	0.98	0.98	0.97	0.98	0.96	0.98	0.97	0.97
24	(2-Naphthalenyloxy)acetic acid C12H10O3 MoNA 436879	MS2	M-H	112.939	482.57	1.18	1.13	1.55	0.33	0	0.92	0.89	2.37	1.77	0	1.55	0	1.81	2.22	0	0.85	1.3	0	481.9	481.9	481.9	481.9	483	481.9	481.9	481.9	483	481.9	481.9	481.9	483	483	481.9	481.9	481.9	483	0.98	0.98	0.97	0.98	0.96	0.98	0.97	0.97
25	NG,NG-Dimethyl-L-arginine [M-H]- C8H18N4O2 NIST 1105492	MS1	M-H	201.135	67.48					2.39	2.28	5.59	6.62	5.84	13.28	14	12.9	35.74	37.24	37.14	80.03	74.1	74.56					67.5	67.5	67.5	67.5	67.5	67.2	67.2	67.2	67.2	67.2	67.2	67.2	67.2	67.2					0.81	0.74	0.94	0.88
25	NG,NG-Dimethyl-L-arginine [M-H]- C8H18N4O2 NIST 1105492	MS2	M-H	156.078	67.48					0	0	1.87	1.61	2.57	5.7	2.87	6.33	8.58	12.93	11.89	21.4	22.1	8.93					67.5	67.5	67.5	67.5	67.5	67.2	67.2	67.2	67.2	67.2	67.2	67.2	67.2	67.2					0.81	0.74	0.94	0.88
25	NG,NG-Dimethyl-L-arginine [M-H]- C8H18N4O2 NIST 1105492	MS2	M-H	136.957	67.48					23.46	23.62	20.95	17.37	22.29	12.13	11.47	17.7	9.69	8.71	7.45	7.02	5.8	5.26					67.5	67.5	67.5	67.5	67.5	67.2	67.2	67.2	67.2	67.2	67.2	67.2	67.2	67.2					0.81	0.74	0.94	0.88
25	NG,NG-Dimethyl-L-arginine [M-H]- C8H18N4O2 NIST 1105492	MS2	M-H	154.96	67.48					7.67	5.15	8.48	8.08	5.68	3.99	3.81	4.85	0	0	1.51	0	0	1.12					67.5	67.5	67.5	67.5	67.5	67.2	67.2	67.2	67.2	67.2	67.2	67.2	67.2	67.2					0.81	0.74	0.94	0.88
25	NG,NG-Dimethyl-L-arginine [M-H]- C8H18N4O2 NIST 1105492	MS2	M-H	116.953	67.48					15.47	15.08	13.14	15.59	16.44	15.27	10.43	11.76	10.06	10.98	12.17	9.98	9.94	8.24					67.5	67.5	67.5	67.5	67.5	67.2	67.2	67.2	67.2	67.2	67.2	67.2	67.2	67.2					0.81	0.74	0.94	0.88
25	NG,NG-Dimethyl-L-arginine [M-H]- C8H18N4O2 NIST 1105492	MS2	M-H	114.059	67.48					0.22	0	0.67	0	0.33	1.45	1.23	0.97	4.39	3.57	4.57	7.18	6.35	5.25					67.5	67.5	67.5	67.5	67.5	67.2	67.2	67.2	67.2	67.2	67.2	67.2	67.2	67.2					0.81	0.74	0.94	0.88
25	NG,NG-Dimethyl-L-arginine [M-H]- C8H18N4O2 NIST 1105492	MS2	M-H	118.937	67.48					11.13	7.72	10.81	6.83	8.61	4.04	6.54	8.07	3.46	4.52	2.96	3.26	3.21	3.43					67.5	67.5	67.5	67.5	67.5	67.2	67.2	67.2	67.2	67.2	67.2	67.2	67.2	67.2					0.81	0.74	0.94	0.88
26	L-Tryptophan [2M-H]- C11H12N2O2 NIST 1188390---L-Tryptophan [M-H]- C11H12N2O2 NIST 1188419---Tryptophan; LC-ESI-ITFT; MS2; HCD; CE 90.0 eV; [M-H]- C11H12N2O2	MS1	M-H	203.082	268.51		0.41					4.49	4.7	4.26	11.41	11.42	11.16	32.05	31.39	29.22	65.29	62.75	64.6		268.5					267.4	268.5	267.4	267.4	268.5	268.5	268.5	268.5	268.5	268.5	267.4	267.4		0.77					0.91	0.97
26	L-Tryptophan [2M-H]- C11H12N2O2 NIST 1188390---L-Tryptophan [M-H]- C11H12N2O2 NIST 1188419---Tryptophan; LC-ESI-ITFT; MS2; HCD; CE 90.0 eV; [M-H]- C11H12N2O2	MS2	M-H	116.05	268.51		0.11					1.76	4.47	2.36	5.72	5.96	5.14	11.49	15.81	12.7	23.6	30.13	25.2		268.5					267.4	268.5	267.4	267.4	268.5	268.5	268.5	268.5	268.5	268.5	267.4	267.4		0.77					0.91	0.97
26	L-Tryptophan [2M-H]- C11H12N2O2 NIST 1188390---L-Tryptophan [M-H]- C11H12N2O2 NIST 1188419---Tryptophan; LC-ESI-ITFT; MS2; HCD; CE 90.0 eV; [M-H]- C11H12N2O2	MS2	M-H	142.067	268.51		0.54					1.95	0.58	1.21	2.67	0	2.24	3.83	5.6	3.61	8.26	7.01	9.38		268.5					267.4	268.5	267.4	267.4	268.5	268.5	268.5	268.5	268.5	268.5	267.4	267.4		0.77					0.91	0.97
26	L-Tryptophan [2M-H]- C11H12N2O2 NIST 1188390---L-Tryptophan [M-H]- C11H12N2O2 NIST 1188419---Tryptophan; LC-ESI-ITFT; MS2; HCD; CE 90.0 eV; [M-H]- C11H12N2O2	MS2	M-H	203.086	268.51		0					2.39	0.59	0	1.74	1.94	0.59	5.24	9	4.52	9.87	17.97	10.58		268.5					267.4	268.5	267.4	267.4	268.5	268.5	268.5	268.5	268.5	268.5	267.4	267.4		0.77					0.91	0.97
26	L-Tryptophan [2M-H]- C11H12N2O2 NIST 1188390---L-Tryptophan [M-H]- C11H12N2O2 NIST 1188419---Tryptophan; LC-ESI-ITFT; MS2; HCD; CE 90.0 eV; [M-H]- C11H12N2O2	MS2	M-H	159.094	268.51		0					0	0.44	0	0	0.09	0.57	1.67	1.4	1.58	2.81	4.28	2.02		268.5					267.4	268.5	267.4	267.4	268.5	268.5	268.5	268.5	268.5	268.5	267.4	267.4		0.77					0.91	0.97
26	L-Tryptophan [2M-H]- C11H12N2O2 NIST 1188390---L-Tryptophan [M-H]- C11H12N2O2 NIST 1188419---Tryptophan; LC-ESI-ITFT; MS2; HCD; CE 90.0 eV; [M-H]- C11H12N2O2	MS2	M-H	74.0273	268.51		0					0.54	0.48	0.18	0.24	0.42	0.36	0.78	1.41	2.04	2.19	2.33	3.69		268.5					267.4	268.5	267.4	267.4	268.5	268.5	268.5	268.5	268.5	268.5	267.4	267.4		0.77					0.91	0.97
27	2-Naphthalenesulfonic acid; LC-ESI-ITFT; MS2; CE C10H8O3S	MS1	M-H	207.012	432.15	28.29	26.82	23.03	23.52	20.41	20.08	35.81	35.55	33.83	21.37	19.81	22.63	24.89	26.52	28.24	35.26	33.35	32.34	432.4	432.4	432.4	432.4	432.4	432.4	432.4	432.4	432.4	432.4	432.4	432.4	432.4	432.4	432.4	432.4	432.4	432.4	0.99	0.98	0.98	0.98	0.97	0.98	0.99	0.98
27	2-Naphthalenesulfonic acid; LC-ESI-ITFT; MS2; CE C10H8O3S	MS2	M-H	207.011	432.15	34.02	28.08	28.55	24.93	22.95	18.72	37.77	42.78	48.22	20.89	20.66	25.91	16.74	27.15	29.21	34.17	34.85	26.03	432.4	432.4	432.4	432.4	432.4	432.4	432.4	432.4	432.4	432.4	432.4	432.4	432.4	432.4	432.4	432.4	432.4	432.4	0.99	0.98	0.98	0.98	0.97	0.98	0.99	0.98
27	2-Naphthalenesulfonic acid; LC-ESI-ITFT; MS2; CE C10H8O3S	MS2	M-H	143.05	432.15	17.5	13.71	15.23	10.59	8.13	10.91	17.42	20.21	20.86	11.33	12.24	13.21	11.23	16.17	16.17	21.22	22.95	20.4	432.4	432.4	432.4	432.4	432.4	432.4	432.4	432.4	432.4	432.4	432.4	432.4	432.4	432.4	432.4	432.4	432.4	432.4	0.99	0.98	0.98	0.98	0.97	0.98	0.99	0.98
27	2-Naphthalenesulfonic acid; LC-ESI-ITFT; MS2; CE C10H8O3S	MS2	M-H	79.9569	432.15	3.86	3.17	2.36	2.4	1.75	1.37	4.64	4.11	4.34	2.99	2.2	1.61	2.99	4.06	3.15	6.37	4.75	2.63	432.4	432.4	432.4	432.4	432.4	432.4	432.4	432.4	432.4	432.4	432.4	432.4	432.4	432.4	432.4	432.4	432.4	432.4	0.99	0.98	0.98	0.98	0.97	0.98	0.99	0.98
27	2-Naphthalenesulfonic acid; LC-ESI-ITFT; MS2; CE C10H8O3S	MS2	M-H	118.992	432.15	4.46	2.74	3.3	4.55	3.16	2.97	2.01	3.89	2.77	3.58	2.15	2.7	2.7	1.44	2.44	2.28	0	2.75	432.4	432.4	432.4	432.4	432.4	432.4	432.4	432.4	432.4	432.4	432.4	432.4	432.4	432.4	432.4	432.4	432.4	432.4	0.99	0.98	0.98	0.98	0.97	0.98	0.99	0.98
27	2-Naphthalenesulfonic acid; LC-ESI-ITFT; MS2; CE C10H8O3S	MS2	M-H	115.055	432.15	0.67	0.6	0.9	0.6	0.37	0.52	0.22	1.12	1.65	0	0.67	1.01	0.45	0.97	0.48	1.01	1.42	1.54	432.4	432.4	432.4	432.4	432.4	432.4	432.4	432.4	432.4	432.4	432.4	432.4	432.4	432.4	432.4	432.4	432.4	432.4	0.99	0.98	0.98	0.98	0.97	0.98	0.99	0.98
27	2-Naphthalenesulfonic acid; LC-ESI-ITFT; MS2; CE C10H8O3S	MS2	M-H	162.912	432.15	0	0	0	0	0	0	0	0	0.35	0	0	0	0	0	0	0	0	0	432.4	432.4	432.4	432.4	432.4	432.4	432.4	432.4	432.4	432.4	432.4	432.4	432.4	432.4	432.4	432.4	432.4	432.4	0.99	0.98	0.98	0.98	0.97	0.98	0.99	0.98
28	D-PANTOTHENIC ACID C9H17NO5---Pantothenate C9H17NO5---Pantothenic acid C9H17NO5	MS1	M-H	218.103	110.09		7.91	7.83	19.2	20.16	20.07	38.4	45.19	45	97.97	85.38	89.4	244.44	249.27	246.99	496.23	505.7	510.91		109	109	109	109	110.1	109	110.1	109	110.1	110.1	109	110.1	109	110.1	109	109	109		0.96	0.97	0.97	0.93	0.98	0.93	0.98
28	D-PANTOTHENIC ACID C9H17NO5---Pantothenate C9H17NO5---Pantothenic acid C9H17NO5	MS2	M-H	146.083	110.09		1.98	2.78	7.96	4.77	6.11	11.34	16.16	12.95	36.89	23.91	30.33	65.04	66.05	107.71	161.88	115.4	150.89		109	109	109	109	110.1	109	110.1	109	110.1	110.1	109	110.1	109	110.1	109	109	109		0.96	0.97	0.97	0.93	0.98	0.93	0.98
28	D-PANTOTHENIC ACID C9H17NO5---Pantothenate C9H17NO5---Pantothenic acid C9H17NO5	MS2	M-H	88.039	110.09		1.34	0.88	2.91	2.88	3.25	3.96	8.55	11.29	19.28	7.99	17.58	28.23	38.3	60.35	123.15	78.6	109.08		109	109	109	109	110.1	109	110.1	109	110.1	110.1	109	110.1	109	110.1	109	109	109		0.96	0.97	0.97	0.93	0.98	0.93	0.98
28	D-PANTOTHENIC ACID C9H17NO5---Pantothenate C9H17NO5---Pantothenic acid C9H17NO5	MS2	M-H	218.106	110.09		1.54	1.69	3.71	3.4	2.31	7.22	5.6	8.5	18.63	8.39	7.91	35.2	20.52	38.22	87.07	57.4	77.75		109	109	109	109	110.1	109	110.1	109	110.1	110.1	109	110.1	109	110.1	109	109	109		0.96	0.97	0.97	0.93	0.98	0.93	0.98
28	D-PANTOTHENIC ACID C9H17NO5---Pantothenate C9H17NO5---Pantothenic acid C9H17NO5	MS2	M-H	71.0501	110.09		0.59	1.2	1.21	0	1.47	1.7	4.29	2.76	7.34	4.7	8.52	13.72	15.57	16.59	39.04	18.09	42.51		109	109	109	109	110.1	109	110.1	109	110.1	110.1	109	110.1	109	110.1	109	109	109		0.96	0.97	0.97	0.93	0.98	0.93	0.98
28	D-PANTOTHENIC ACID C9H17NO5---Pantothenate C9H17NO5---Pantothenic acid C9H17NO5	MS2	M-H	116.074	110.09		0	0	0	0.15	0	0	0.07	0.22	1.43	1.01	2.22	2.25	4.28	4.31	6.84	6.27	7.55		109	109	109	109	110.1	109	110.1	109	110.1	110.1	109	110.1	109	110.1	109	109	109		0.96	0.97	0.97	0.93	0.98	0.93	0.98
28	D-PANTOTHENIC ACID C9H17NO5---Pantothenate C9H17NO5---Pantothenic acid C9H17NO5	MS2	M-H	71.0142	110.09		0	0.24	1.03	0.18	0.73	0.76	0.94	2.21	1.85	2.44	3.31	3.91	5.72	7.23	12.84	6.09	10.27		109	109	109	109	110.1	109	110.1	109	110.1	110.1	109	110.1	109	110.1	109	109	109		0.96	0.97	0.97	0.93	0.98	0.93	0.98
29	5-Hydroxy-L-tryptophan [M-H]- C11H12N2O3 NIST 1184886---5-Hydroxy-L-tryptophan [M-H]- C11H12N2O3 NIST 1184887	MS1	M-H	219.077	140.09				7.21	6.96	8.64	15.22	16.8	16.51	35.11	35.64	33.78	92.73	90.78	92.71	186.31	174.62	185.45				138.7	138.7	140.9	139.8	139.8	137.6	138.7	139.8	139.8	139.8	138.7	139.8	139.8	138.7	138.7				0.92	0.86	0.86	0.9	0.92
29	5-Hydroxy-L-tryptophan [M-H]- C11H12N2O3 NIST 1184886---5-Hydroxy-L-tryptophan [M-H]- C11H12N2O3 NIST 1184887	MS2	M-H	144.045	140.09				1.83	2.59	4.09	3.9	4.43	5.56	9.41	10.21	10.09	17.1	36.14	22.27	42.46	55.77	50.24				138.7	138.7	140.9	139.8	139.8	137.6	138.7	139.8	139.8	139.8	138.7	139.8	139.8	138.7	138.7				0.92	0.86	0.86	0.9	0.92
29	5-Hydroxy-L-tryptophan [M-H]- C11H12N2O3 NIST 1184886---5-Hydroxy-L-tryptophan [M-H]- C11H12N2O3 NIST 1184887	MS2	M-H	132.046	140.09				1.44	1	1.4	4.77	3.56	5.21	5.76	6.57	6.85	13.06	24.6	16.37	30.49	37.91	33.88				138.7	138.7	140.9	139.8	139.8	137.6	138.7	139.8	139.8	139.8	138.7	139.8	139.8	138.7	138.7				0.92	0.86	0.86	0.9	0.92
29	5-Hydroxy-L-tryptophan [M-H]- C11H12N2O3 NIST 1184886---5-Hydroxy-L-tryptophan [M-H]- C11H12N2O3 NIST 1184887	MS2	M-H	219.078	140.09				0.98	1.81	1.31	1.66	1.49	1.95	4.58	6.19	3.87	6.81	11.29	13.45	15.51	22.25	20.56				138.7	138.7	140.9	139.8	139.8	137.6	138.7	139.8	139.8	139.8	138.7	139.8	139.8	138.7	138.7				0.92	0.86	0.86	0.9	0.92
29	5-Hydroxy-L-tryptophan [M-H]- C11H12N2O3 NIST 1184886---5-Hydroxy-L-tryptophan [M-H]- C11H12N2O3 NIST 1184887	MS2	M-H	175.087	140.09				0.09	0	0	0	0	0	0	0	1.1	0	2.25	1.56	1.94	3.45	3.69				138.7	138.7	140.9	139.8	139.8	137.6	138.7	139.8	139.8	139.8	138.7	139.8	139.8	138.7	138.7				0.92	0.86	0.86	0.9	0.92
29	5-Hydroxy-L-tryptophan [M-H]- C11H12N2O3 NIST 1184886---5-Hydroxy-L-tryptophan [M-H]- C11H12N2O3 NIST 1184887	MS2	M-H	74.0264	140.09				0.36	0	0	0	0	0.57	0.72	0	1.35	1.86	5.46	2.61	3.25	5.94	5.45				138.7	138.7	140.9	139.8	139.8	137.6	138.7	139.8	139.8	139.8	138.7	139.8	139.8	138.7	138.7				0.92	0.86	0.86	0.9	0.92
29	5-Hydroxy-L-tryptophan [M-H]- C11H12N2O3 NIST 1184886---5-Hydroxy-L-tryptophan [M-H]- C11H12N2O3 NIST 1184887	MS2	M-H	158.062	140.09				0.52	0	0	0.17	0.7	0	1.75	0.61	1.93	2.67	7.41	3.06	6.12	8.06	6.58				138.7	138.7	140.9	139.8	139.8	137.6	138.7	139.8	139.8	139.8	138.7	139.8	139.8	138.7	138.7				0.92	0.86	0.86	0.9	0.92
30	Carnosine C9H14N4O3---Carnosine C9H14N4O3 MassBank 2596	MS1	M-H	225.099	61.63	0.79	1.49	0.89	3.7	2.88	4.14	8.71	7.22	8.85	21.81	21.96	21	57.54	54.12	51.44	120.31	115.48	117.5	61.6	61.6	61.6	61.6	61.6	61.7	61.7	61.7	61.7	61.7	61.7	61.7	61.7	61.7	61.7	61.7	61.7	61.7	0.95	0.88	0.91	0.92	0.93	0.84	0.92	0.93
30	Carnosine C9H14N4O3---Carnosine C9H14N4O3 MassBank 2596	MS2	M-H	154.062	61.63	0.74	0.86	1.03	2.95	3.38	2.6	5.56	7.07	8.53	13.05	17.88	8.44	39.63	36.01	35.97	77.71	55.65	69.46	61.6	61.6	61.6	61.6	61.6	61.7	61.7	61.7	61.7	61.7	61.7	61.7	61.7	61.7	61.7	61.7	61.7	61.7	0.95	0.88	0.91	0.92	0.93	0.84	0.92	0.93
30	Carnosine C9H14N4O3---Carnosine C9H14N4O3 MassBank 2596	MS2	M-H	110.071	61.63	0.66	1.21	1.02	1.87	1.24	2.08	4.67	3.48	6.04	8.51	11.14	9.24	28.61	27.77	34.9	70.37	60.92	44.07	61.6	61.6	61.6	61.6	61.6	61.7	61.7	61.7	61.7	61.7	61.7	61.7	61.7	61.7	61.7	61.7	61.7	61.7	0.95	0.88	0.91	0.92	0.93	0.84	0.92	0.93
30	Carnosine C9H14N4O3---Carnosine C9H14N4O3 MassBank 2596	MS2	M-H	71.0139	61.63	0.44	0	0.59	1.73	1.02	0.65	2.22	0.06	2.11	4.18	3.07	2.23	6.88	4.51	8.18	11.43	12.83	8.72	61.6	61.6	61.6	61.6	61.6	61.7	61.7	61.7	61.7	61.7	61.7	61.7	61.7	61.7	61.7	61.7	61.7	61.7	0.95	0.88	0.91	0.92	0.93	0.84	0.92	0.93
30	Carnosine C9H14N4O3---Carnosine C9H14N4O3 MassBank 2596	MS2	M-H	136.051	61.63	0	0	0	0	0	0	0	0.4	0.16	0.41	0.37	0.57	1.46	1.22	1.34	2.97	1.91	0.89	61.6	61.6	61.6	61.6	61.6	61.7	61.7	61.7	61.7	61.7	61.7	61.7	61.7	61.7	61.7	61.7	61.7	61.7	0.95	0.88	0.91	0.92	0.93	0.84	0.92	0.93
30	Carnosine C9H14N4O3---Carnosine C9H14N4O3 MassBank 2596	MS2	M-H	59.0138	61.63	2.08	2.24	0.45	2.81	1.74	2.22	3.05	2.02	3.33	6.76	5.01	3.99	12.07	11.88	14.33	22.55	21.28	17.51	61.6	61.6	61.6	61.6	61.6	61.7	61.7	61.7	61.7	61.7	61.7	61.7	61.7	61.7	61.7	61.7	61.7	61.7	0.95	0.88	0.91	0.92	0.93	0.84	0.92	0.93
30	Carnosine C9H14N4O3---Carnosine C9H14N4O3 MassBank 2596	MS2	M-H	225.099	61.63	0.1	0.73	0	0.62	0.63	2.19	2.67	2.51	3.87	4.49	5.43	2.21	16.04	9.83	6.31	21.52	11.53	31.64	61.6	61.6	61.6	61.6	61.6	61.7	61.7	61.7	61.7	61.7	61.7	61.7	61.7	61.7	61.7	61.7	61.7	61.7	0.95	0.88	0.91	0.92	0.93	0.84	0.92	0.93
30	ISF of Carnosine C9H14N4O3---Carnosine C9H14N4O3 MassBank 2596	MS1	-	154.062	61.63	3.71			9.49	8.77	9.6	18.28	20.34	19.79	39.87	43.58	44.8	111.7	108.55	104.74	170.79	163.62	167.08	61.6			62.8	61.7	61.7	62.8	61.7	61.7	61.7	61.7	61.7	61.7	61.7	61.7	61.7	61.7	61.7	0.87			0.92	0.91	0.92	0.93	0.91
30	ISF of Carnosine C9H14N4O3---Carnosine C9H14N4O3 MassBank 2596	MS2	-	154.062	61.63	1.55			3.25	3.44	2.37	2.51	5.83	4.55	4.71	9.31	14.78	15.31	23.85	25.99	44.1	26.44	41.33	61.6			62.8	61.7	61.7	62.8	61.7	61.7	61.7	61.7	61.7	61.7	61.7	61.7	61.7	61.7	61.7	0.87			0.92	0.91	0.92	0.93	0.91
30	ISF of Carnosine C9H14N4O3---Carnosine C9H14N4O3 MassBank 2596	MS2	-	93.0451	61.63	14.36			7.73	8.02	8.41	8.74	9.01	9.15	8.73	10.89	12.77	18.69	21.91	20.6	36.7	30.6	31.73	61.6			62.8	61.7	61.7	62.8	61.7	61.7	61.7	61.7	61.7	61.7	61.7	61.7	61.7	61.7	61.7	0.87			0.92	0.91	0.92	0.93	0.91
30	ISF of Carnosine C9H14N4O3---Carnosine C9H14N4O3 MassBank 2596	MS2	-	137.037	61.63	2.28			4.69	1.94	2.28	3.88	5.43	4.35	4.53	4.35	8.05	15.88	16.57	12.38	23.88	16.93	25.51	61.6			62.8	61.7	61.7	62.8	61.7	61.7	61.7	61.7	61.7	61.7	61.7	61.7	61.7	61.7	61.7	0.87			0.92	0.91	0.92	0.93	0.91
30	ISF of Carnosine C9H14N4O3---Carnosine C9H14N4O3 MassBank 2596	MS2	-	67.0302	61.63	0.17			0.28	0	0.46	0.51	0.57	1.03	0.77	1.85	2.34	2.65	2.76	3.36	5.65	4.21	5.6	61.6			62.8	61.7	61.7	62.8	61.7	61.7	61.7	61.7	61.7	61.7	61.7	61.7	61.7	61.7	61.7	0.87			0.92	0.91	0.92	0.93	0.91
30	ISF of Carnosine C9H14N4O3---Carnosine C9H14N4O3 MassBank 2596	MS2	-	109.046	61.63	0			0	0	0	1.02	0	0.65	0	0	1.75	3.29	4.01	2.03	5.6	8.18	8.09	61.6			62.8	61.7	61.7	62.8	61.7	61.7	61.7	61.7	61.7	61.7	61.7	61.7	61.7	61.7	61.7	0.87			0.92	0.91	0.92	0.93	0.91
30	ISF of Carnosine C9H14N4O3---Carnosine C9H14N4O3 MassBank 2596	MS2	-	80.0392	61.63	0			0.53	0.25	0	0.19	0	0.19	1.63	1.22	2.03	2.7	4.24	2.56	7.08	5.59	3.3	61.6			62.8	61.7	61.7	62.8	61.7	61.7	61.7	61.7	61.7	61.7	61.7	61.7	61.7	61.7	61.7	0.87			0.92	0.91	0.92	0.93	0.91
31	ISF of Melatonin C13H16N2O2 MoNA 439448	MS1	-	216.09	496.53										13.08		12.63	31.62	28.68	30.41	64.08	57.05	62.5										496.2		495.1	496.2	496.2	496.2	496.2	496.2	496.2
31	ISF of Melatonin C13H16N2O2 MoNA 439448	MS2	-	144.048	496.53										1.88		2.75	3.09	3.85	2.97	6.52	7.32	6.79										496.2		495.1	496.2	496.2	496.2	496.2	496.2	496.2
31	ISF of Melatonin C13H16N2O2 MoNA 439448	MS2	-	145.048	496.53										0.17		0.67	0.33	0.25	1.13	0.97	1.97	0.97										496.2		495.1	496.2	496.2	496.2	496.2	496.2	496.2
31	Melatonin C13H16N2O2 MoNA 439448	MS1	M-H	231.114	496.53	16.71	16.66	14.73	42.32	45.52	45.17	90.13	85.97	93.14	175.21	175.14	163.25	397.97	399.62	399.77	768.47	748.16	773.38	495.1	496.2	495.1	496.2	496.2	496.2	496.2	496.2	496.2	496.2	496.2	496.2	496.2	496.2	496.2	496.2	496.2	496.2	0.98	0.98	0.96	0.99	0.99	0.97	0.99	0.97
31	Melatonin C13H16N2O2 MoNA 439448	MS2	M-H	144.046	496.53	13.15	10.72	10.03	30.9	36.55	32.58	67.34	84.26	62.08	150.8	152.15	115.76	334.33	399.04	415.21	676.96	804.32	691.72	495.1	496.2	495.1	496.2	496.2	496.2	496.2	496.2	496.2	496.2	496.2	496.2	496.2	496.2	496.2	496.2	496.2	496.2	0.98	0.98	0.96	0.99	0.99	0.97	0.99	0.97
31	Melatonin C13H16N2O2 MoNA 439448	MS2	M-H	216.091	496.53	7.2	4.3	6.8	25.99	21.75	24.89	45.32	47.3	49.05	80.09	77.12	121.78	240.21	118.57	131.23	607.9	476.9	439.09	495.1	496.2	495.1	496.2	496.2	496.2	496.2	496.2	496.2	496.2	496.2	496.2	496.2	496.2	496.2	496.2	496.2	496.2	0.98	0.98	0.96	0.99	0.99	0.97	0.99	0.97
31	Melatonin C13H16N2O2 MoNA 439448	MS2	M-H	145.053	496.53	3.86	2.69	3.27	6.79	8.62	7.23	12.49	18.7	11.99	25.62	27.66	26.69	80.54	70.09	70.97	164.82	191.58	155.34	495.1	496.2	495.1	496.2	496.2	496.2	496.2	496.2	496.2	496.2	496.2	496.2	496.2	496.2	496.2	496.2	496.2	496.2	0.98	0.98	0.96	0.99	0.99	0.97	0.99	0.97
31	Melatonin C13H16N2O2 MoNA 439448	MS2	M-H	231.114	496.53	0.95	1.64	2.12	6.94	6.41	8.11	15	14.3	14.85	29.82	22.36	29.58	65.7	48.43	40.69	180.52	98.41	91.63	495.1	496.2	495.1	496.2	496.2	496.2	496.2	496.2	496.2	496.2	496.2	496.2	496.2	496.2	496.2	496.2	496.2	496.2	0.98	0.98	0.96	0.99	0.99	0.97	0.99	0.97
31	Melatonin C13H16N2O2 MoNA 439448	MS2	M-H	58.0306	496.53	0	0	0.27	0.32	0.53	1.04	0.98	1.6	0.96	3.06	2.2	2.04	5.04	3.08	6.44	12.66	17.15	12.45	495.1	496.2	495.1	496.2	496.2	496.2	496.2	496.2	496.2	496.2	496.2	496.2	496.2	496.2	496.2	496.2	496.2	496.2	0.98	0.98	0.96	0.99	0.99	0.97	0.99	0.97
31	Melatonin C13H16N2O2 MoNA 439448	MS2	M-H	143.599	496.53	0	0	0	0	0	0.25	0.25	0.42	0.17	0.42	1.55	0	2.14	2.34	2.25	3.09	5.18	3.63	495.1	496.2	495.1	496.2	496.2	496.2	496.2	496.2	496.2	496.2	496.2	496.2	496.2	496.2	496.2	496.2	496.2	496.2	0.98	0.98	0.96	0.99	0.99	0.97	0.99	0.97
32	Anserine C10H16N4O3	MS1	M-H	239.115	64.45				4.7	3.95	4.17	8.61	10.7	10.34	21.55	25.17	23.65	62.76	65.59	60.95	124.15	123.57	128				63.9	63.9	65	63.9	65	63.9	63.9	65	65	65	65	65	65	65	65				0.9	0.86	0.96	0.97	0.92
32	Anserine C10H16N4O3	MS2	M-H	168.077	64.45				3.66	1.89	3.56	5.78	6.69	7.81	13.39	17.99	13.72	35.53	47.3	29.51	68.67	70.74	55.77				63.9	63.9	65	63.9	65	63.9	63.9	65	65	65	65	65	65	65	65				0.9	0.86	0.96	0.97	0.92
32	Anserine C10H16N4O3	MS2	M-H	239.115	64.45				0.54	1.94	1.48	2.15	2.16	6.4	6.73	6.5	7.6	22.28	12.98	8.79	22.88	23.58	19.59				63.9	63.9	65	63.9	65	63.9	63.9	65	65	65	65	65	65	65	65				0.9	0.86	0.96	0.97	0.92
32	Anserine C10H16N4O3	MS2	M-H	166.098	64.45				0.36	0	1.07	3.19	0.72	1.22	2.42	3.53	3.99	9.32	8.16	5.91	16.39	11.11	10.45				63.9	63.9	65	63.9	65	63.9	63.9	65	65	65	65	65	65	65	65				0.9	0.86	0.96	0.97	0.92
32	Anserine C10H16N4O3	MS2	M-H	151.049	64.45				0	0.39	0.43	1.29	0	0.94	2.87	2.01	1.02	4.41	5.93	4.15	8.31	10.27	9.11				63.9	63.9	65	63.9	65	63.9	63.9	65	65	65	65	65	65	65	65				0.9	0.86	0.96	0.97	0.92
32	Anserine C10H16N4O3	MS2	M-H	151.058	64.45				0	0.39	0.43	1.29	0	0.94	2.87	1.93	1.02	4.41	5.93	3.46	8.01	10.27	8.77				63.9	63.9	65	63.9	65	63.9	63.9	65	65	65	65	65	65	65	65				0.9	0.86	0.96	0.97	0.92
32	Anserine C10H16N4O3	MS2	M-H	58.0294	64.45				0	0.45	0	1.19	0.93	1.11	2.81	3.38	1.14	8.09	8.21	4.51	10.47	12.98	9.52				63.9	63.9	65	63.9	65	63.9	63.9	65	65	65	65	65	65	65	65				0.9	0.86	0.96	0.97	0.92
33	THYMIDINE C10H14N2O5	MS1	M-H	241.083	253.62					39.35		85.07			161.16		163.82	399.84	403.07	400.67	837.64	749.4	767.85					253.1		254.2			253.1		253.1	254.2	253.1	253.1	254.2	253.1	253.1					1		1
33	THYMIDINE C10H14N2O5	MS2	M-H	125.035	253.62					9.98		19.89			47.47		42.71	114.7	106.87	87.38	230.08	119.6	200.01					253.1		254.2			253.1		253.1	254.2	253.1	253.1	254.2	253.1	253.1					1		1
33	THYMIDINE C10H14N2O5	MS2	M-H	151.051	253.62					0.26		0.43			0.34		1.54	2.35	0.99	1.62	3.37	1.8	4.11					253.1		254.2			253.1		253.1	254.2	253.1	253.1	254.2	253.1	253.1					1		1
34	Cytarabine C9H13N3O5	MS1	M-H	242.079	93.68													16.13		14.34	31.84		28.97													93.6		93.6	93.6		92.5
34	Cytarabine C9H13N3O5	MS2	M-H	110.039	93.68													0.29		0.8	1.32		0.58													93.6		93.6	93.6		92.5
34	Cytarabine C9H13N3O5	MS2	M-H	109.041	93.68													1.64		1.67	4.12		2.07													93.6		93.6	93.6		92.5
35	URIDINE C9H12N2O6---Uridine C9H12N2O6	MS1	M-H	243.062	108.82	11.34	11.2	10.5	30.19	26.97	28.55	56.54	61.65	59.9	124.29	116.77	131.83	319.69	311.7	313.12	609.01	631.62	607.83	109	107.9	109	109	107.9	109	109	109	107.9	109	109	109	109	109	109	109	109	109	0.86	0.92	0.66	0.85	0.96	0.99	0.98	0.95
35	URIDINE C9H12N2O6---Uridine C9H12N2O6	MS2	M-H	110.025	108.82	0.91	0.44	0	2.08	2.52	3.58	4.38	3.4	5.17	9.96	9.89	9	19.9	17.84	22.55	43.75	45.83	62.18	109	107.9	109	109	107.9	109	109	109	107.9	109	109	109	109	109	109	109	109	109	0.86	0.92	0.66	0.85	0.96	0.99	0.98	0.95
35	URIDINE C9H12N2O6---Uridine C9H12N2O6	MS2	M-H	111.021	108.82	1.84	1.55	1.65	4.73	6.35	5.03	9.67	7.48	10.72	18.71	14.7	14.05	38.72	35.83	42.65	65.68	79.71	90.58	109	107.9	109	109	107.9	109	109	109	107.9	109	109	109	109	109	109	109	109	109	0.86	0.92	0.66	0.85	0.96	0.99	0.98	0.95
35	URIDINE C9H12N2O6---Uridine C9H12N2O6	MS2	M-H	82.0291	108.82	0	0.06	0	1.17	0.5	0.38	1.67	0.6	0.69	3.09	2.46	1.51	4.13	5.69	5.82	15.15	12.26	9.72	109	107.9	109	109	107.9	109	109	109	107.9	109	109	109	109	109	109	109	109	109	0.86	0.92	0.66	0.85	0.96	0.99	0.98	0.95
35	URIDINE C9H12N2O6---Uridine C9H12N2O6	MS2	M-H	200.06	108.82	0.93	0.39	0.74	0	0.69	0.59	1.77	1.72	0.59	3.4	2.71	1.92	10.15	3.94	7.76	13.04	14.48	31.95	109	107.9	109	109	107.9	109	109	109	107.9	109	109	109	109	109	109	109	109	109	0.86	0.92	0.66	0.85	0.96	0.99	0.98	0.95
35	URIDINE C9H12N2O6---Uridine C9H12N2O6	MS2	M-H	152.035	108.82	0.6	0.43	0.13	0	1.64	0.3	0.51	0.81	0.64	2.92	1.29	1.51	4.64	4	4.8	7.56	9.56	13.26	109	107.9	109	109	107.9	109	109	109	107.9	109	109	109	109	109	109	109	109	109	0.86	0.92	0.66	0.85	0.96	0.99	0.98	0.95
35	URIDINE C9H12N2O6---Uridine C9H12N2O6	MS2	M-H	122.025	108.82	0	0	0	0.12	0.08	0.31	0.84	0	0.46	1	1.19	2.11	3.77	3.73	3.27	6.83	5.39	8.07	109	107.9	109	109	107.9	109	109	109	107.9	109	109	109	109	109	109	109	109	109	0.86	0.92	0.66	0.85	0.96	0.99	0.98	0.95
36	BIOTIN C10H16N2O3S---Biotin C10H16N2O3S---Biotin C10H16N2O3S MoNA 436926	MS1	M-H	243.081	261.84	33.8	32.97	32.57	85.27	84.21	83.28	175.55	170.74	172.45	356.06	347.84	332.6	847.48	853.03	822.88	1721.36	1671.26	1612.65	261.9	260.8	260.8	260.8	260.8	260.8	260.8	261.9	259.7	260.8	260.8	260.8	260.8	260.8	260.8	260.8	259.7	259.7	1	0.98	0.99	1	0.99	0.98	0.99	0.98
36	BIOTIN C10H16N2O3S---Biotin C10H16N2O3S---Biotin C10H16N2O3S MoNA 436926	MS2	M-H	243.08	261.84	19.61	17.93	9.05	35.69	21.95	22.27	101.9	46.02	54.78	256.77	117.47	114.71	369.21	200.18	540.87	966.89	814.58	609.14	261.9	260.8	260.8	260.8	260.8	260.8	260.8	261.9	259.7	260.8	260.8	260.8	260.8	260.8	260.8	260.8	259.7	259.7	1	0.98	0.99	1	0.99	0.98	0.99	0.98
36	BIOTIN C10H16N2O3S---Biotin C10H16N2O3S---Biotin C10H16N2O3S MoNA 436926	MS2	M-H	200.075	261.84	7.23	6.21	4.33	11.73	6.7	9.36	27.62	22.16	25.62	57.9	53.54	61.8	153.71	85.56	150.63	280.05	249.64	186.66	261.9	260.8	260.8	260.8	260.8	260.8	260.8	261.9	259.7	260.8	260.8	260.8	260.8	260.8	260.8	260.8	259.7	259.7	1	0.98	0.99	1	0.99	0.98	0.99	0.98
36	BIOTIN C10H16N2O3S---Biotin C10H16N2O3S---Biotin C10H16N2O3S MoNA 436926	MS2	M-H	166.087	261.84	4.43	2.61	4.88	7.67	4	5.86	20.94	15.53	15.34	37.76	39.14	52.04	96.39	70.27	94	170.12	185.99	140.88	261.9	260.8	260.8	260.8	260.8	260.8	260.8	261.9	259.7	260.8	260.8	260.8	260.8	260.8	260.8	260.8	259.7	259.7	1	0.98	0.99	1	0.99	0.98	0.99	0.98
36	BIOTIN C10H16N2O3S---Biotin C10H16N2O3S---Biotin C10H16N2O3S MoNA 436926	MS2	M-H	122.095	261.84	1.08	0.62	1.31	1.85	1.51	1.19	4.19	7.02	4.97	6.63	12.63	17.25	25.11	23.1	29.74	44.79	56.69	48.79	261.9	260.8	260.8	260.8	260.8	260.8	260.8	261.9	259.7	260.8	260.8	260.8	260.8	260.8	260.8	260.8	259.7	259.7	1	0.98	0.99	1	0.99	0.98	0.99	0.98
36	BIOTIN C10H16N2O3S---Biotin C10H16N2O3S---Biotin C10H16N2O3S MoNA 436926	MS2	M-H	199.095	261.84	0.49	1.53	0.2	2.75	0.74	0.59	4.65	2.31	2.99	9.78	5.89	5.26	14.07	9.53	22.64	41.19	34.42	21.3	261.9	260.8	260.8	260.8	260.8	260.8	260.8	261.9	259.7	260.8	260.8	260.8	260.8	260.8	260.8	260.8	259.7	259.7	1	0.98	0.99	1	0.99	0.98	0.99	0.98
36	BIOTIN C10H16N2O3S---Biotin C10H16N2O3S---Biotin C10H16N2O3S MoNA 436926	MS2	M-H	156.084	261.84	0.48	1.09	0.13	0.61	1.61	2.44	4.49	5.05	5.04	8.01	10.5	13.47	26.02	18.66	21.84	38.41	44.55	36.27	261.9	260.8	260.8	260.8	260.8	260.8	260.8	261.9	259.7	260.8	260.8	260.8	260.8	260.8	260.8	260.8	259.7	259.7	1	0.98	0.99	1	0.99	0.98	0.99	0.98
37	.alpha.-D-Galactose 1-phosphate [2M-H]- C6H13O9P NIST 1159669---.alpha.-D-Galactose 1-phosphate [M-H]- C6H13O9P NIST 1159743---D-Glucose 6-phosphate [2M-H]- C6H13O9P NIST 1178368---D-Glucose 6-phosphate [M-H-H2O]- C6H13O9P NIST 1178409	MS1	M-H	259.021	69.56	12.16			33.1		29.5	66.15	70.06	68.28	143.52	138.3	128.92	322.83	142.78	96.97	612.37	605.6	611.53	69.6			69.6		69.6	69.6	69.6	69.6	69.6	69.6	69.6	69.6	77.1	78.2	69.6	69.6	69.6	0.56			0.63		0.65	0.74	0.75
37	.alpha.-D-Galactose 1-phosphate [2M-H]- C6H13O9P NIST 1159669---.alpha.-D-Galactose 1-phosphate [M-H]- C6H13O9P NIST 1159743---D-Glucose 6-phosphate [2M-H]- C6H13O9P NIST 1178368---D-Glucose 6-phosphate [M-H-H2O]- C6H13O9P NIST 1178409	MS2	M-H	96.9705	69.56	6.42			24.91		24.34	50.64	44.52	54.95	64.49	71.72	76.62	223.6	72.71	63.76	460.54	403.45	406.71	69.6			69.6		69.6	69.6	69.6	69.6	69.6	69.6	69.6	69.6	77.1	78.2	69.6	69.6	69.6	0.56			0.63		0.65	0.74	0.75
37	.alpha.-D-Galactose 1-phosphate [2M-H]- C6H13O9P NIST 1159669---.alpha.-D-Galactose 1-phosphate [M-H]- C6H13O9P NIST 1159743---D-Glucose 6-phosphate [2M-H]- C6H13O9P NIST 1178368---D-Glucose 6-phosphate [M-H-H2O]- C6H13O9P NIST 1178409	MS2	M-H	241.013	69.56	0			0		0	0	0	0	0	3.13	0	9.82	0	0	0	17.84	0	69.6			69.6		69.6	69.6	69.6	69.6	69.6	69.6	69.6	69.6	77.1	78.2	69.6	69.6	69.6	0.56			0.63		0.65	0.74	0.75
37	.alpha.-D-Galactose 1-phosphate [2M-H]- C6H13O9P NIST 1159669---.alpha.-D-Galactose 1-phosphate [M-H]- C6H13O9P NIST 1159743---D-Glucose 6-phosphate [2M-H]- C6H13O9P NIST 1178368---D-Glucose 6-phosphate [M-H-H2O]- C6H13O9P NIST 1178409	MS2	M-H	78.9601	69.56	6.17			13.85		18.25	31.97	33.5	28.56	55.17	43.82	53.6	169.54	52.87	49.53	283.23	319.53	296.45	69.6			69.6		69.6	69.6	69.6	69.6	69.6	69.6	69.6	69.6	77.1	78.2	69.6	69.6	69.6	0.56			0.63		0.65	0.74	0.75
37	.alpha.-D-Galactose 1-phosphate [2M-H]- C6H13O9P NIST 1159669---.alpha.-D-Galactose 1-phosphate [M-H]- C6H13O9P NIST 1159743---D-Glucose 6-phosphate [2M-H]- C6H13O9P NIST 1178368---D-Glucose 6-phosphate [M-H-H2O]- C6H13O9P NIST 1178409	MS2	M-H	196.923	69.56	16.51			17.13		16.52	15.19	18.36	17.46	14.47	15.51	14.53	9.37	15.16	13.56	10.2	9.28	6.68	69.6			69.6		69.6	69.6	69.6	69.6	69.6	69.6	69.6	69.6	77.1	78.2	69.6	69.6	69.6	0.56			0.63		0.65	0.74	0.75
37	.alpha.-D-Galactose 1-phosphate [2M-H]- C6H13O9P NIST 1159669---.alpha.-D-Galactose 1-phosphate [M-H]- C6H13O9P NIST 1159743---D-Glucose 6-phosphate [2M-H]- C6H13O9P NIST 1178368---D-Glucose 6-phosphate [M-H-H2O]- C6H13O9P NIST 1178409	MS2	M-H	258.977	69.56	62.42			53.74		55.61	55.43	61	62.63	59.3	50.42	44.3	50.5	68.32	56.23	44.66	48.44	51.96	69.6			69.6		69.6	69.6	69.6	69.6	69.6	69.6	69.6	69.6	77.1	78.2	69.6	69.6	69.6	0.56			0.63		0.65	0.74	0.75
38	D-Glucose 6-phosphate [2M-H]- C6H13O9P NIST 1178366---D-Mannose 6-phosphate [2M-H]- C6H13O9P NIST 1159962---D-Mannose-6-phosphate; LC-ESI-QTOF; MS2; CE C6H13O9P	MS1	M-H	259.022	57.28	12.78	13.61	12.33	34.96	30.67	31.36	68.52	70.22	70.85	148.02	141.52	133.51	338.48	338.9	336.34	660.97	658.25	668.84	57.3	57.3	57.3	57.3	57.3	57.3	57.3	57.3	57.3	57.3	57.3	57.3	57.3	57.3	57.3	57.3	57.3	57.3	0.98	0.93	0.96	0.98	0.99	0.97	1	0.98
38	D-Glucose 6-phosphate [2M-H]- C6H13O9P NIST 1178366---D-Mannose 6-phosphate [2M-H]- C6H13O9P NIST 1159962---D-Mannose-6-phosphate; LC-ESI-QTOF; MS2; CE C6H13O9P	MS2	M-H	96.9696	57.28	5.28	9.35	9.91	22.48	28.39	26.1	51.18	41.96	52.96	64.33	71.84	85.61	243.03	147.4	170.81	595.73	432.89	431.4	57.3	57.3	57.3	57.3	57.3	57.3	57.3	57.3	57.3	57.3	57.3	57.3	57.3	57.3	57.3	57.3	57.3	57.3	0.98	0.93	0.96	0.98	0.99	0.97	1	0.98
38	D-Glucose 6-phosphate [2M-H]- C6H13O9P NIST 1178366---D-Mannose 6-phosphate [2M-H]- C6H13O9P NIST 1159962---D-Mannose-6-phosphate; LC-ESI-QTOF; MS2; CE C6H13O9P	MS2	M-H	78.959	57.28	5.01	4.58	8.32	13.32	23.07	21.23	34.06	31.27	29.25	55.57	42.84	60.75	181.01	127.79	157.27	304.6	359.5	312.61	57.3	57.3	57.3	57.3	57.3	57.3	57.3	57.3	57.3	57.3	57.3	57.3	57.3	57.3	57.3	57.3	57.3	57.3	0.98	0.93	0.96	0.98	0.99	0.97	1	0.98
38	D-Glucose 6-phosphate [2M-H]- C6H13O9P NIST 1178366---D-Mannose 6-phosphate [2M-H]- C6H13O9P NIST 1159962---D-Mannose-6-phosphate; LC-ESI-QTOF; MS2; CE C6H13O9P	MS2	M-H	259.019	57.28	1.68	2.79	0.95	5.05	2.9	3.25	8.67	13.18	11.41	15.67	19.96	10.21	40.96	20.72	51.34	103.91	83.23	52.67	57.3	57.3	57.3	57.3	57.3	57.3	57.3	57.3	57.3	57.3	57.3	57.3	57.3	57.3	57.3	57.3	57.3	57.3	0.98	0.93	0.96	0.98	0.99	0.97	1	0.98
38	D-Glucose 6-phosphate [2M-H]- C6H13O9P NIST 1178366---D-Mannose 6-phosphate [2M-H]- C6H13O9P NIST 1159962---D-Mannose-6-phosphate; LC-ESI-QTOF; MS2; CE C6H13O9P	MS2	M-H	138.98	57.28	1.06	0.65	0.62	3.74	2.01	6.65	9.24	8.12	7.89	11.55	10.2	11.28	26.26	19.97	26.74	81.54	52.7	59.78	57.3	57.3	57.3	57.3	57.3	57.3	57.3	57.3	57.3	57.3	57.3	57.3	57.3	57.3	57.3	57.3	57.3	57.3	0.98	0.93	0.96	0.98	0.99	0.97	1	0.98
38	D-Glucose 6-phosphate [2M-H]- C6H13O9P NIST 1178366---D-Mannose 6-phosphate [2M-H]- C6H13O9P NIST 1159962---D-Mannose-6-phosphate; LC-ESI-QTOF; MS2; CE C6H13O9P	MS2	M-H	241.016	57.28	0.11	0.32	0.76	1.68	1.29	1.03	4.16	2.65	4.49	4.23	3.46	4.21	11.37	8.29	13.3	33.36	21.53	16.48	57.3	57.3	57.3	57.3	57.3	57.3	57.3	57.3	57.3	57.3	57.3	57.3	57.3	57.3	57.3	57.3	57.3	57.3	0.98	0.93	0.96	0.98	0.99	0.97	1	0.98
38	D-Glucose 6-phosphate [2M-H]- C6H13O9P NIST 1178366---D-Mannose 6-phosphate [2M-H]- C6H13O9P NIST 1159962---D-Mannose-6-phosphate; LC-ESI-QTOF; MS2; CE C6H13O9P	MS2	M-H	168.996	57.28	0.54	0.54	0	0.91	0	1.94	2.8	3.12	3.21	3.85	4.2	3.26	11.2	7.88	9.42	22.74	16.26	16.76	57.3	57.3	57.3	57.3	57.3	57.3	57.3	57.3	57.3	57.3	57.3	57.3	57.3	57.3	57.3	57.3	57.3	57.3	0.98	0.93	0.96	0.98	0.99	0.97	1	0.98
39	ISF of N-gamma-Acetyl-N-2-formyl-5-methoxykynurenamine C13H16N2O4	MS1	-	204.067	460.73																6.43	6.62	7.03																459.9	461	461
39	ISF of N-gamma-Acetyl-N-2-formyl-5-methoxykynurenamine C13H16N2O4	MS2	-	132.044	460.73																0	0	0.16																459.9	461	461
39	ISF of N-gamma-Acetyl-N-2-formyl-5-methoxykynurenamine C13H16N2O4	MS2	-	144.043	460.73																0.17	0.17	0.34																459.9	461	461
39	ISF of N-gamma-Acetyl-N-2-formyl-5-methoxykynurenamine C13H16N2O4	MS2	-	161.048	460.73																0.57	0	0																459.9	461	461
39	ISF of N-gamma-Acetyl-N-2-formyl-5-methoxykynurenamine C13H16N2O4	MS2	-	146.023	460.73																0.25	0.59	0.17																459.9	461	461
39	ISF of N-gamma-Acetyl-N-2-formyl-5-methoxykynurenamine C13H16N2O4	MS2	-	150.892	460.73																0.72	0	0																459.9	461	461
39	ISF of N-gamma-Acetyl-N-2-formyl-5-methoxykynurenamine C13H16N2O4	MS2	-	118.031	460.73																0	0	0																459.9	461	461
39	N-gamma-Acetyl-N-2-formyl-5-methoxykynurenamine C13H16N2O4	MS1	M-H	263.104	460.73											0.41		2.96	2.01	2.45	4.49	4.71	5.73											460.7		460.7	460.7	460.7	460.7	461	461
39	N-gamma-Acetyl-N-2-formyl-5-methoxykynurenamine C13H16N2O4	MS2	M-H	189.047	460.73											1.53		3.64	2.96	4.22	6.65	9.58	4.45											460.7		460.7	460.7	460.7	460.7	461	461
39	N-gamma-Acetyl-N-2-formyl-5-methoxykynurenamine C13H16N2O4	MS2	M-H	145.053	460.73											0.08		0.42	0.67	0.25	1.09	1.93	1.51											460.7		460.7	460.7	460.7	460.7	461	461
39	N-gamma-Acetyl-N-2-formyl-5-methoxykynurenamine C13H16N2O4	MS2	M-H	160.041	460.73											0		0.18	0	0.26	1.06	1.54	0.53											460.7		460.7	460.7	460.7	460.7	461	461
39	N-gamma-Acetyl-N-2-formyl-5-methoxykynurenamine C13H16N2O4	MS2	M-H	188.036	460.73											0.29		0	0.1	0.19	0	0	0.29											460.7		460.7	460.7	460.7	460.7	461	461
39	N-gamma-Acetyl-N-2-formyl-5-methoxykynurenamine C13H16N2O4	MS2	M-H	204.074	460.73											0.4		2.18	0.55	1.74	5.72	2.34	3.13											460.7		460.7	460.7	460.7	460.7	461	461
39	N-gamma-Acetyl-N-2-formyl-5-methoxykynurenamine C13H16N2O4	MS2	M-H	58.0297	460.73											0		1.06	0.93	0.26	1.38	2.58	1.17											460.7		460.7	460.7	460.7	460.7	461	461
40	Dodecyl sulfate; PlaSMA ID-444 C12H26O4S	MS1	M-H	265.148	723.85	268.82	278.03	278.43	267.02	272.6	252.72	281.05	283.03	275.61	348.4	279.71	274.59	323.8	319.95	304.84	341.9	327.83	353	723.9	723.9	723.9	723.9	723.9	723.9	723.9	723.9	723.9	723.9	723.9	723.9	723.9	723.9	723.9	723.9	723.9	723.9	0.99	0.99	0.98	0.97	0.99	0.99	0.99	0.99
40	Dodecyl sulfate; PlaSMA ID-444 C12H26O4S	MS2	M-H	265.148	723.85	106.51	125.07	92.54	145.2	122.26	161.93	117.82	129.88	166.54	149.57	94.44	131.64	166.71	122.17	138.65	190.51	149.29	146.46	723.9	723.9	723.9	723.9	723.9	723.9	723.9	723.9	723.9	723.9	723.9	723.9	723.9	723.9	723.9	723.9	723.9	723.9	0.99	0.99	0.98	0.97	0.99	0.99	0.99	0.99
40	Dodecyl sulfate; PlaSMA ID-444 C12H26O4S	MS2	M-H	96.9611	723.85	45.87	86.72	55.42	42.89	63.47	45.28	60.76	53.37	77.15	104.57	46.72	50.23	41.79	52.99	64.17	72.67	81.01	57.01	723.9	723.9	723.9	723.9	723.9	723.9	723.9	723.9	723.9	723.9	723.9	723.9	723.9	723.9	723.9	723.9	723.9	723.9	0.99	0.99	0.98	0.97	0.99	0.99	0.99	0.99
40	Dodecyl sulfate; PlaSMA ID-444 C12H26O4S	MS2	M-H	128.967	723.85	1.28	1.07	0	2.57	1.46	0.67	1.02	2.14	0.63	1.42	0.71	0.99	0.63	0.57	0	0	2.88	0	723.9	723.9	723.9	723.9	723.9	723.9	723.9	723.9	723.9	723.9	723.9	723.9	723.9	723.9	723.9	723.9	723.9	723.9	0.99	0.99	0.98	0.97	0.99	0.99	0.99	0.99
40	Dodecyl sulfate; PlaSMA ID-444 C12H26O4S	MS2	M-H	264.323	723.85	0	0.34	0.11	0	0	1.98	0	0.62	0.62	0	0	0.34	1.24	0	0.51	1.64	0	0.79	723.9	723.9	723.9	723.9	723.9	723.9	723.9	723.9	723.9	723.9	723.9	723.9	723.9	723.9	723.9	723.9	723.9	723.9	0.99	0.99	0.98	0.97	0.99	0.99	0.99	0.99
40	Dodecyl sulfate; PlaSMA ID-444 C12H26O4S	MS2	M-H	112.989	723.85	4.65	4.97	6.81	6.81	6.36	7.86	5.81	5.7	8.25	9.81	5.42	6.44	8.04	7.84	5.54	5.18	7.23	7.76	723.9	723.9	723.9	723.9	723.9	723.9	723.9	723.9	723.9	723.9	723.9	723.9	723.9	723.9	723.9	723.9	723.9	723.9	0.99	0.99	0.98	0.97	0.99	0.99	0.99	0.99
40	Dodecyl sulfate; PlaSMA ID-444 C12H26O4S	MS2	M-H	79.9594	723.85	0.78	1.34	1	0	0.75	1.4	2.05	1.06	1.4	1.86	1.34	0.53	0.59	1.31	2.18	1.78	1.4	0.74	723.9	723.9	723.9	723.9	723.9	723.9	723.9	723.9	723.9	723.9	723.9	723.9	723.9	723.9	723.9	723.9	723.9	723.9	0.99	0.99	0.98	0.97	0.99	0.99	0.99	0.99
41	Adenosine C10H13N5O4---Adenosine C10H13N5O4 MoNA 436595---Adenosine; LC-ESI-QTOF; MS2; CE C10H13N5O4	MS1	M-H	266.089	274.05							6.14			11.72			37.22	36.67	31.2	65.68	65.42	63.7							274			272.9			274	272.9	272.9	272.9	272.9	272.9							1
41	Adenosine C10H13N5O4---Adenosine C10H13N5O4 MoNA 436595---Adenosine; LC-ESI-QTOF; MS2; CE C10H13N5O4	MS2	M-H	134.047	274.05							6.23			13.72			40.48	35.25	28.59	70.65	64.07	63.25							274			272.9			274	272.9	272.9	272.9	272.9	272.9							1
41	Adenosine C10H13N5O4---Adenosine C10H13N5O4 MoNA 436595---Adenosine; LC-ESI-QTOF; MS2; CE C10H13N5O4	MS2	M-H	107.037	274.05							0.43			0.94			1.3	2.1	2.06	2.35	1.98	3.29							274			272.9			274	272.9	272.9	272.9	272.9	272.9							1
41	ISF of Adenosine C10H13N5O4---Adenosine C10H13N5O4 MoNA 436595---Adenosine; LC-ESI-QTOF; MS2; CE C10H13N5O4	MS1	-	134.047	274.05					2.82	2.33	7.02			13.42	13.92	15.06	40.92	38.24	37.39	72.27	70.06	69.45					274.1	274.1	274.1			272.9	274	274	274	272.9	272.9	272.9	272.9	272.9					0.83	0.94	0.99
41	ISF of Adenosine C10H13N5O4---Adenosine C10H13N5O4 MoNA 436595---Adenosine; LC-ESI-QTOF; MS2; CE C10H13N5O4	MS2	-	134.048	274.05					0.4	0.64	0.81			3.01	4.1	2.66	7.48	7.27	7.95	9.59	16.28	11.88					274.1	274.1	274.1			272.9	274	274	274	272.9	272.9	272.9	272.9	272.9					0.83	0.94	0.99
41	ISF of Adenosine C10H13N5O4---Adenosine C10H13N5O4 MoNA 436595---Adenosine; LC-ESI-QTOF; MS2; CE C10H13N5O4	MS2	-	107.037	274.05					0	0.36	0.22			1.48	1.01	1.98	1.91	2.92	1.41	2.99	4.33	4.04					274.1	274.1	274.1			272.9	274	274	274	272.9	272.9	272.9	272.9	272.9					0.83	0.94	0.99
41	ISF of Adenosine C10H13N5O4---Adenosine C10H13N5O4 MoNA 436595---Adenosine; LC-ESI-QTOF; MS2; CE C10H13N5O4	MS2	-	92.024	274.05					0.27	1.2	1.37			0.3	0.7	0.67	0.33	1.34	1.61	1.07	1.87	0.74					274.1	274.1	274.1			272.9	274	274	274	272.9	272.9	272.9	272.9	272.9					0.83	0.94	0.99
42	Homocystine C8H16N2O4S2	MS1	M-H	267.048	64.44				4.32	4.82	3.52	9.23	10.19	10.7	18.61	20.17	20.44	50.36	51.68	50	98.22	94.79	94.93				62.8	63.9	64.4	62.8	63.9	62.8	63.9	63.9	63.9	63.9	63.9	63.9	63.9	63.9	63.9				0.87	0.96	0.84	0.9	0.97
42	Homocystine C8H16N2O4S2	MS2	M-H	132.012	64.44				0.48	1.6	0.76	2.2	2.48	1.88	4.64	2.69	2.84	6.41	5.78	7.16	11.33	13.85	21.03				62.8	63.9	64.4	62.8	63.9	62.8	63.9	63.9	63.9	63.9	63.9	63.9	63.9	63.9	63.9				0.87	0.96	0.84	0.9	0.97
42	Homocystine C8H16N2O4S2	MS2	M-H	72.0102	64.44				1.36	0.77	0.83	0.89	1.57	1.15	3.55	2.52	2.46	7.13	6.34	8.06	11.05	12.53	17.26				62.8	63.9	64.4	62.8	63.9	62.8	63.9	63.9	63.9	63.9	63.9	63.9	63.9	63.9	63.9				0.87	0.96	0.84	0.9	0.97
42	Homocystine C8H16N2O4S2	MS2	M-H	114.984	64.44				0.9	1.38	1.31	2.13	2.74	1.76	4.12	4.56	3.58	7.16	7.2	8.21	12.68	15.49	16.18				62.8	63.9	64.4	62.8	63.9	62.8	63.9	63.9	63.9	63.9	63.9	63.9	63.9	63.9	63.9				0.87	0.96	0.84	0.9	0.97
42	Homocystine C8H16N2O4S2	MS2	M-H	88.0249	64.44				0	0.13	0	0	0.59	0	1.4	0.2	0.49	2.68	1.57	1.73	4.54	4.11	4.69				62.8	63.9	64.4	62.8	63.9	62.8	63.9	63.9	63.9	63.9	63.9	63.9	63.9	63.9	63.9				0.87	0.96	0.84	0.9	0.97
42	Homocystine C8H16N2O4S2	MS2	M-H	70.9956	64.44				0.41	0.06	0	0.35	0.77	0.41	0	0.47	1.64	3.47	1.94	2.43	5.22	4.15	4.72				62.8	63.9	64.4	62.8	63.9	62.8	63.9	63.9	63.9	63.9	63.9	63.9	63.9	63.9	63.9				0.87	0.96	0.84	0.9	0.97
42	Homocystine C8H16N2O4S2	MS2	M-H	134.03	64.44				0	1.29	0.57	1.13	1.09	0.64	4.28	2.98	1.85	5.75	4.56	6.08	9.63	8.45	12.76				62.8	63.9	64.4	62.8	63.9	62.8	63.9	63.9	63.9	63.9	63.9	63.9	63.9	63.9	63.9				0.87	0.96	0.84	0.9	0.97
43	ISF of Inosine C10H12N4O5 MoNA 439079	MS1	-	135.031	173.26													5.77	6.04	5.7		12.27	11.44													172.8	171.7	172.8		171.7	171.7
43	ISF of Inosine C10H12N4O5 MoNA 439079	MS2	-	135.033	173.26													0.48	1.3	1.46		2.03	2.8													172.8	171.7	172.8		171.7	171.7
43	ISF of Inosine C10H12N4O5 MoNA 439079	MS2	-	92.026	173.26													0.33	1.17	1.37		2	2.11													172.8	171.7	172.8		171.7	171.7
43	ISF of Inosine C10H12N4O5 MoNA 439079	MS2	-	91.0005	173.26													0	0	0		0	0													172.8	171.7	172.8		171.7	171.7
43	ISF of Inosine C10H12N4O5 MoNA 439079	MS2	-	65.0153	173.26													0.34	0.17	0		0.5	0.28													172.8	171.7	172.8		171.7	171.7
43	ISF of Inosine C10H12N4O5 MoNA 439079	MS2	-	116.954	173.26													6.07	3.19	3.91		3.41	2.48													172.8	171.7	172.8		171.7	171.7
43	ISF of Inosine C10H12N4O5 MoNA 439079	MS2	-	66.0123	173.26													0	0	0		0	0													172.8	171.7	172.8		171.7	171.7
43	Inosine C10H12N4O5 MoNA 439079	MS1	M-H	267.073	172.96	6.93	5.16	6.78	14.07	14.34	14.35	30.81	29.77	30.17	54.3	56.22	57.07	147.27	148.62	147.56	283.46	294.37	289.87	171.7	171.7	171.7	171.7	171.7	172.8	172.8	172.8	170.6	171.7	171.7	171.7	172.8	171.7	172.8	171.7	171.7	171.7	0.88	0.94	0.93	0.94	0.97	0.97	0.99	0.97
43	Inosine C10H12N4O5 MoNA 439079	MS2	M-H	135.031	172.96	5.21	5.08	3.68	7.05	11.49	10.28	28.29	23.86	18.85	49.89	39.25	46.54	166.49	135.48	139.28	280.52	308.09	219.73	171.7	171.7	171.7	171.7	171.7	172.8	172.8	172.8	170.6	171.7	171.7	171.7	172.8	171.7	172.8	171.7	171.7	171.7	0.88	0.94	0.93	0.94	0.97	0.97	0.99	0.97
43	Inosine C10H12N4O5 MoNA 439079	MS2	M-H	267.074	172.96	3.14	3.64	2.91	3.86	4.27	3.75	10.95	10.68	10.7	27.35	25.36	20.65	64.03	71.82	50.34	123.62	111.5	122.84	171.7	171.7	171.7	171.7	171.7	172.8	172.8	172.8	170.6	171.7	171.7	171.7	172.8	171.7	172.8	171.7	171.7	171.7	0.88	0.94	0.93	0.94	0.97	0.97	0.99	0.97
43	Inosine C10H12N4O5 MoNA 439079	MS2	M-H	108.02	172.96	0	0.29	0	0.29	0.22	0.22	0.29	1.19	0.22	1.23	1.56	1.16	6.74	3.58	2.57	3.91	6.6	5.62	171.7	171.7	171.7	171.7	171.7	172.8	172.8	172.8	170.6	171.7	171.7	171.7	172.8	171.7	172.8	171.7	171.7	171.7	0.88	0.94	0.93	0.94	0.97	0.97	0.99	0.97
43	Inosine C10H12N4O5 MoNA 439079	MS2	M-H	92.0254	172.96	0	0	0.27	0	0.13	0	0.44	0.8	0	1.34	0.13	0.77	2.11	2.54	1.77	3.76	3.81	5.66	171.7	171.7	171.7	171.7	171.7	172.8	172.8	172.8	170.6	171.7	171.7	171.7	172.8	171.7	172.8	171.7	171.7	171.7	0.88	0.94	0.93	0.94	0.97	0.97	0.99	0.97
43	Inosine C10H12N4O5 MoNA 439079	MS2	M-H	134.615	172.96	0	0	0	0	0	0	0	0	0.16	0	0	0	0	0	0.81	2.02	1.57	1.45	171.7	171.7	171.7	171.7	171.7	172.8	172.8	172.8	170.6	171.7	171.7	171.7	172.8	171.7	172.8	171.7	171.7	171.7	0.88	0.94	0.93	0.94	0.97	0.97	0.99	0.97
43	Inosine C10H12N4O5 MoNA 439079	MS2	M-H	135.602	172.96	0	0	0	0	0	0	0	0	0	0	0	0	0	0	0	0	0	0	171.7	171.7	171.7	171.7	171.7	172.8	172.8	172.8	170.6	171.7	171.7	171.7	172.8	171.7	172.8	171.7	171.7	171.7	0.88	0.94	0.93	0.94	0.97	0.97	0.99	0.97
44	6-Phosphogluconic acid [2M-H]- C6H13O10P NIST 1179934---6-Phosphogluconic acid [M-H-H2O]- C6H13O10P NIST 1179949	MS1	M-H	275.017	57.39	0.97			2.06	1.57	1.77	5.48	5.14	5.34	10.9	14.13	13.37	36.86	39.37	39.91	74.05	73.47	76.09	57.4			57.4	57.4	57.4	57.4	57.3	57.4	57.3	58.4	57.3	57.3	57.3	57.3	57.3	57.3	57.3	0.81			0.8	0.81	0.8	0.81	0.92
44	6-Phosphogluconic acid [2M-H]- C6H13O10P NIST 1179934---6-Phosphogluconic acid [M-H-H2O]- C6H13O10P NIST 1179949	MS2	M-H	96.9701	57.39	6.41			26.68	31.38	28.75	56.92	41.96	57.72	68.16	79.23	88.92	250.66	155.36	179.36	607.05	437.28	447.17	57.4			57.4	57.4	57.4	57.4	57.3	57.4	57.3	58.4	57.3	57.3	57.3	57.3	57.3	57.3	57.3	0.81			0.8	0.81	0.8	0.81	0.92
44	6-Phosphogluconic acid [2M-H]- C6H13O10P NIST 1179934---6-Phosphogluconic acid [M-H-H2O]- C6H13O10P NIST 1179949	MS2	M-H	78.9599	57.39	5.95			15.82	24.2	23.17	36.9	31.27	33.13	57.77	46.16	62.86	187.16	133.23	161.78	316.13	365.59	322.17	57.4			57.4	57.4	57.4	57.4	57.3	57.4	57.3	58.4	57.3	57.3	57.3	57.3	57.3	57.3	57.3	0.81			0.8	0.81	0.8	0.81	0.92
44	6-Phosphogluconic acid [2M-H]- C6H13O10P NIST 1179934---6-Phosphogluconic acid [M-H-H2O]- C6H13O10P NIST 1179949	MS2	M-H	275.014	57.39	0			0	0	0	0	1.05	1.15	0.35	2.25	0.46	4.28	3.41	7.39	13.39	13.44	10.35	57.4			57.4	57.4	57.4	57.4	57.3	57.4	57.3	58.4	57.3	57.3	57.3	57.3	57.3	57.3	57.3	0.81			0.8	0.81	0.8	0.81	0.92
44	6-Phosphogluconic acid [2M-H]- C6H13O10P NIST 1179934---6-Phosphogluconic acid [M-H-H2O]- C6H13O10P NIST 1179949	MS2	M-H	177.042	57.39	0			0	0	0	0	0	0.28	0	0.55	0	0	1.29	0.55	2.92	1.66	0.74	57.4			57.4	57.4	57.4	57.4	57.3	57.4	57.3	58.4	57.3	57.3	57.3	57.3	57.3	57.3	57.3	0.81			0.8	0.81	0.8	0.81	0.92
44	6-Phosphogluconic acid [2M-H]- C6H13O10P NIST 1179934---6-Phosphogluconic acid [M-H-H2O]- C6H13O10P NIST 1179949	MS2	M-H	257.013	57.39	0			0	0	0	0	0.22	0	0	0	0	0.67	0	0.11	1.73	1.5	1.9	57.4			57.4	57.4	57.4	57.4	57.3	57.4	57.3	58.4	57.3	57.3	57.3	57.3	57.3	57.3	57.3	0.81			0.8	0.81	0.8	0.81	0.92
44	D-Ribose 5-phosphate [M-H]- C5H11O8P NIST 1159938	MS1	M+HCOO	275.017	57.27	0.97			2.06	1.57	1.77	5.48	5.14	5.34	10.9	14.13	13.37	36.86	39.37	39.91	74.05	73.47	76.09	57.3			57.3	57.3	57.3	57.3	57.3	57.3	57.3	58.4	57.3	57.3	57.3	57.3	57.3	57.3	57.3	0.78			0.8	0.82	0.8	0.79	0.87
44	D-Ribose 5-phosphate [M-H]- C5H11O8P NIST 1159938	MS2	M+HCOO	96.9684	57.27	6.41			26.68	31.38	28.75	56.92	41.96	57.72	68.16	79.23	88.92	250.66	155.36	179.36	607.19	437.28	447.17	57.3			57.3	57.3	57.3	57.3	57.3	57.3	57.3	58.4	57.3	57.3	57.3	57.3	57.3	57.3	57.3	0.78			0.8	0.82	0.8	0.79	0.87
44	D-Ribose 5-phosphate [M-H]- C5H11O8P NIST 1159938	MS2	M+HCOO	275.018	57.27	0			0	0	0	0	1.05	1.15	0.35	2.25	0.46	4.28	3.87	7.39	13.39	13.44	10.35	57.3			57.3	57.3	57.3	57.3	57.3	57.3	57.3	58.4	57.3	57.3	57.3	57.3	57.3	57.3	57.3	0.78			0.8	0.82	0.8	0.79	0.87
44	D-Ribose 5-phosphate [M-H]- C5H11O8P NIST 1159938	MS2	M+HCOO	78.9593	57.27	5.95			15.82	24.2	23.17	36.9	31.27	33.13	57.77	46.16	62.86	187.16	133.23	161.78	316.13	365.59	322.17	57.3			57.3	57.3	57.3	57.3	57.3	57.3	57.3	58.4	57.3	57.3	57.3	57.3	57.3	57.3	57.3	0.78			0.8	0.82	0.8	0.79	0.87
44	D-Ribose 5-phosphate [M-H]- C5H11O8P NIST 1159938	MS2	M+HCOO	206.977	57.27	0			0	0.6	0	0	0	0.6	0.4	0	0.6	1.55	0.65	1.3	2.2	1.75	1.55	57.3			57.3	57.3	57.3	57.3	57.3	57.3	57.3	58.4	57.3	57.3	57.3	57.3	57.3	57.3	57.3	0.78			0.8	0.82	0.8	0.79	0.87
45	Dibutyl phthalate C16H22O4 MoNA 436807	MS1	M-H	277.144	664.13	52.21	64.6	65.27	61.4	61.6	59.53	57.96	51.97	57.67	59.28	65.21	60.46	64.11	59.62	57.57	63.53	59.14	56.52	663.4	663.4	663.4	663.4	663.4	663.4	663.4	663.4	663.4	663.4	663.4	663.4	663.4	664.5	663.4	663.4	663.4	663.4	0.98	0.97	0.97	0.99	0.99	0.93	0.98	0.99
45	Dibutyl phthalate C16H22O4 MoNA 436807	MS2	M-H	134.039	664.13	5.3	3.5	4.88	3.87	3.55	4.45	5.33	4.07	3.87	4.25	4.28	4.56	4.67	3.68	4.8	3.75	6.85	3.34	663.4	663.4	663.4	663.4	663.4	663.4	663.4	663.4	663.4	663.4	663.4	663.4	663.4	664.5	663.4	663.4	663.4	663.4	0.98	0.97	0.97	0.99	0.99	0.93	0.98	0.99
45	Dibutyl phthalate C16H22O4 MoNA 436807	MS2	M-H	162.954	664.13	5.35	4.94	4.3	4.7	7.43	3.52	4.77	5.27	4.8	5.81	7.84	4.84	3.85	3.45	3.02	4.36	3.58	4.52	663.4	663.4	663.4	663.4	663.4	663.4	663.4	663.4	663.4	663.4	663.4	663.4	663.4	664.5	663.4	663.4	663.4	663.4	0.98	0.97	0.97	0.99	0.99	0.93	0.98	0.99
45	Dibutyl phthalate C16H22O4 MoNA 436807	MS2	M-H	277.149	664.13	2.2	1.51	4.23	1.8	1.51	2.26	2.03	3.94	2.79	1.27	1.62	2.73	6.51	2.61	4.1	2.32	6.32	4.36	663.4	663.4	663.4	663.4	663.4	663.4	663.4	663.4	663.4	663.4	663.4	663.4	663.4	664.5	663.4	663.4	663.4	663.4	0.98	0.97	0.97	0.99	0.99	0.93	0.98	0.99
45	Dibutyl phthalate C16H22O4 MoNA 436807	MS2	M-H	127.113	664.13	3.26	3.53	3.89	2.49	2.83	3.06	3.53	2.63	2.04	2.08	2.36	2.83	3.73	4.17	3.14	2.91	2.93	2.63	663.4	663.4	663.4	663.4	663.4	663.4	663.4	663.4	663.4	663.4	663.4	663.4	663.4	664.5	663.4	663.4	663.4	663.4	0.98	0.97	0.97	0.99	0.99	0.93	0.98	0.99
45	Dibutyl phthalate C16H22O4 MoNA 436807	MS2	M-H	208.958	664.13	1.71	2.01	0.96	1.2	0.73	0	1.73	1.71	0	0	0.63	1.06	2.67	0	1.31	1.46	1.91	1.91	663.4	663.4	663.4	663.4	663.4	663.4	663.4	663.4	663.4	663.4	663.4	663.4	663.4	664.5	663.4	663.4	663.4	663.4	0.98	0.97	0.97	0.99	0.99	0.93	0.98	0.99
45	Dibutyl phthalate C16H22O4 MoNA 436807	MS2	M-H	77.04	664.13	2.36	1.71	2.51	3	2.54	2.71	2.72	2.6	2.82	2.2	2.96	2.08	1.65	1.65	1.68	2.82	2.29	2.93	663.4	663.4	663.4	663.4	663.4	663.4	663.4	663.4	663.4	663.4	663.4	663.4	663.4	664.5	663.4	663.4	663.4	663.4	0.98	0.97	0.97	0.99	0.99	0.93	0.98	0.99
46	1-Methyladenosine [2M-H]- C11H15N5O4 NIST 1070098	MS1	M-H	280.105	113.5										3.97	4.11		13		13.34	28.86	29.91	28.51										113.5	114.5		114.5		114.5	113.4	113.4	113.4
46	1-Methyladenosine [2M-H]- C11H15N5O4 NIST 1070098	MS2	M-H	148.064	113.5										3.57	3.2		8.87		7.97	17.05	16.57	16.57										113.5	114.5		114.5		114.5	113.4	113.4	113.4
46	1-Methyladenosine [2M-H]- C11H15N5O4 NIST 1070098	MS2	M-H	107.035	113.5										0.65	0.07		0.72		1.01	2.42	0.68	1.87										113.5	114.5		114.5		114.5	113.4	113.4	113.4
46	1-Methyladenosine [2M-H]- C11H15N5O4 NIST 1070098	MS2	M-H	133.036	113.5										0	0		0		0.08	0.08	0	0										113.5	114.5		114.5		114.5	113.4	113.4	113.4
47	ISF of N6-Methyladenosine C11H15N5O4	MS1	-	148.063	343.71	7.45	6.72	6.84	18.66	19.25	18.31	39.1	37.4	39.79	77.11	74.14	81.79	188.98	192.45	186.06	364.35	357.86	369.4	343.3	343.3	342.2	343.3	343.3	343.3	343.3	343.3	343.3	342.2	343.3	343.3	343.3	343.3	343.3	343.3	343.3	343.3	0.9	0.91	0.93	0.95	0.95	0.92	0.96	0.98
47	ISF of N6-Methyladenosine C11H15N5O4	MS2	-	133.04	343.71	1.45	0.76	1.93	5.29	2.97	5.27	11.16	8.45	7.76	15.25	15.23	17.23	39.77	47.92	42.19	76.65	101.03	70.96	343.3	343.3	342.2	343.3	343.3	343.3	343.3	343.3	343.3	342.2	343.3	343.3	343.3	343.3	343.3	343.3	343.3	343.3	0.9	0.91	0.93	0.95	0.95	0.92	0.96	0.98
47	ISF of N6-Methyladenosine C11H15N5O4	MS2	-	148.063	343.71	1.31	0.51	0.59	1.83	3.64	3.05	6.78	6.14	4.92	5.51	7.86	9.66	12.6	30.46	24.1	23.98	59.89	30.34	343.3	343.3	342.2	343.3	343.3	343.3	343.3	343.3	343.3	342.2	343.3	343.3	343.3	343.3	343.3	343.3	343.3	343.3	0.9	0.91	0.93	0.95	0.95	0.92	0.96	0.98
47	ISF of N6-Methyladenosine C11H15N5O4	MS2	-	132.032	343.71	0.24	0.48	0.4	1.24	1.16	3.69	4	3.24	1.68	7.81	6.5	7.61	20.98	13.3	17.24	41.67	33.76	36.68	343.3	343.3	342.2	343.3	343.3	343.3	343.3	343.3	343.3	342.2	343.3	343.3	343.3	343.3	343.3	343.3	343.3	343.3	0.9	0.91	0.93	0.95	0.95	0.92	0.96	0.98
47	ISF of N6-Methyladenosine C11H15N5O4	MS2	-	117.021	343.71	0	0	0	0	0	0	0	0.34	0.08	0.83	1.09	1.88	2.6	2.49	1.85	5.36	4.37	5.57	343.3	343.3	342.2	343.3	343.3	343.3	343.3	343.3	343.3	342.2	343.3	343.3	343.3	343.3	343.3	343.3	343.3	343.3	0.9	0.91	0.93	0.95	0.95	0.92	0.96	0.98
47	ISF of N6-Methyladenosine C11H15N5O4	MS2	-	146.049	343.71	0	0	0	0	0	0	0.59	0.08	0	0.97	1.43	1.13	1.01	0.72	3.08	3.24	4.62	2.44	343.3	343.3	342.2	343.3	343.3	343.3	343.3	343.3	343.3	342.2	343.3	343.3	343.3	343.3	343.3	343.3	343.3	343.3	0.9	0.91	0.93	0.95	0.95	0.92	0.96	0.98
47	ISF of N6-Methyladenosine C11H15N5O4	MS2	-	106.028	343.71	0	0	0	0.14	0.07	0	1.18	0.75	0	0.93	1.07	1.29	2.12	1.72	3.05	5.21	5.71	5.82	343.3	343.3	342.2	343.3	343.3	343.3	343.3	343.3	343.3	342.2	343.3	343.3	343.3	343.3	343.3	343.3	343.3	343.3	0.9	0.91	0.93	0.95	0.95	0.92	0.96	0.98
47	ISF of N6-Methyladenosine C11H15N5O4	MS1	-	133.039	342.58				0.16	0.32		1.01	0.73	0.83	2.42	1.64	1.86	5.23	4.41	4.97	9.65	10.97	10.71				342.6	342.6		342.6	342.6	342.6	342.6	342.6	342.6	342.2	343.3	342.6	343.3	343.3	343.3				0.74	0.85		0.84	0.83
47	ISF of N6-Methyladenosine C11H15N5O4	MS2	-	132.038	342.58				1.24	1.16		4	3.24	1.68	7.61	6.5	7.61	19.94	13.3	17.32	41.27	33.48	36.32				342.6	342.6		342.6	342.6	342.6	342.6	342.6	342.6	342.2	343.3	342.6	343.3	343.3	343.3				0.74	0.85		0.84	0.83
47	ISF of N6-Methyladenosine C11H15N5O4	MS2	-	132.871	342.58				4.31	8.92		6.43	11.57	5.98	7.92	8.1	10.17	1.71	3.57	6.62	0	2.36	2.12				342.6	342.6		342.6	342.6	342.6	342.6	342.6	342.6	342.2	343.3	342.6	343.3	343.3	343.3				0.74	0.85		0.84	0.83
47	ISF of N6-Methyladenosine C11H15N5O4	MS2	-	133.034	342.58				5.29	2.97		11.16	8.45	8	15.87	15.31	17.79	38.91	47.92	42.75	75.51	99.45	69.63				342.6	342.6		342.6	342.6	342.6	342.6	342.6	342.6	342.2	343.3	342.6	343.3	343.3	343.3				0.74	0.85		0.84	0.83
47	ISF of N6-Methyladenosine C11H15N5O4	MS2	-	66.0116	342.58				0	0.06		0.23	0	0	0.06	0	0.28	1.02	0.93	1.27	1.67	1.52	1.92				342.6	342.6		342.6	342.6	342.6	342.6	342.6	342.6	342.2	343.3	342.6	343.3	343.3	343.3				0.74	0.85		0.84	0.83
47	N6-Methyladenosine C11H15N5O4	MS1	M-H	280.105	343.71	4.76		5.66	11.79	11.5	13.18	29.04	29.07	27.76	60.51	60.86	59.11	147.6	149.42	147.01	298.76	293.39	293.65	343.3		343.3	343.3	343.3	343.3	343.3	343.3	343.3	342.2	343.3	343.3	343.3	343.3	343.3	343.3	343.3	343.3	0.97		0.91	0.96	0.97	0.97	0.97	0.98
47	N6-Methyladenosine C11H15N5O4	MS2	M-H	148.063	343.71	3.73		3.09	11.04	12.23	12.7	16.87	23.19	20.78	34.69	33.01	49.38	97.42	85.57	109.97	195.25	287.03	206.38	343.3		343.3	343.3	343.3	343.3	343.3	343.3	343.3	342.2	343.3	343.3	343.3	343.3	343.3	343.3	343.3	343.3	0.97		0.91	0.96	0.97	0.97	0.97	0.98
47	N6-Methyladenosine C11H15N5O4	MS2	M-H	133.039	343.71	0.36		1.44	3.62	2.49	3.3	3.17	4.82	3.5	8.91	7.65	10.3	13.91	20.48	13.94	33.64	46.43	49.64	343.3		343.3	343.3	343.3	343.3	343.3	343.3	343.3	342.2	343.3	343.3	343.3	343.3	343.3	343.3	343.3	343.3	0.97		0.91	0.96	0.97	0.97	0.97	0.98
47	N6-Methyladenosine C11H15N5O4	MS2	M-H	147.604	343.71	0		0	0	0	0	0	0	0	0	0	0	0.34	0.76	0.08	1.35	0.84	0.89	343.3		343.3	343.3	343.3	343.3	343.3	343.3	343.3	342.2	343.3	343.3	343.3	343.3	343.3	343.3	343.3	343.3	0.97		0.91	0.96	0.97	0.97	0.97	0.98
47	N6-Methyladenosine C11H15N5O4	MS2	M-H	132.031	343.71	0		0	0.32	0	0.08	0	0	0.28	1.28	1.64	1.28	1.76	2.89	2.6	5.24	5.9	4.81	343.3		343.3	343.3	343.3	343.3	343.3	343.3	343.3	342.2	343.3	343.3	343.3	343.3	343.3	343.3	343.3	343.3	0.97		0.91	0.96	0.97	0.97	0.97	0.98
47	N6-Methyladenosine C11H15N5O4	MS2	M-H	147.622	343.71	0		0	0	0	0	0	0	0	0	0	0	0	0	0	0	0	0	343.3		343.3	343.3	343.3	343.3	343.3	343.3	343.3	342.2	343.3	343.3	343.3	343.3	343.3	343.3	343.3	343.3	0.97		0.91	0.96	0.97	0.97	0.97	0.98
48	Glucose 1-phosphate [M-H]- C6H13O9P NIST 1170654	MS1	M+Na-2H	281.004	57.27									3.83	8.08	7.88	7.32	20.63	22.73	21.16	46.69	43.19	44.94									57.3	57.3	57.3	58.4	57.3	57.3	57.3	57.3	57.3	57.3
48	Glucose 1-phosphate [M-H]- C6H13O9P NIST 1170654	MS2	M+Na-2H	78.9604	57.27									1.3	2.32	4.7	4.25	9.52	3.77	4.1	14.23	10.29	14.06									57.3	57.3	57.3	58.4	57.3	57.3	57.3	57.3	57.3	57.3
48	Glucose 1-phosphate [M-H]- C6H13O9P NIST 1170654	MS2	M+Na-2H	160.961	57.27									0.97	1.99	3.14	1.28	3.94	3.67	3.85	4.25	4.2	5.21									57.3	57.3	57.3	58.4	57.3	57.3	57.3	57.3	57.3	57.3
48	Glucose 1-phosphate [M-H]- C6H13O9P NIST 1170654	MS2	M+Na-2H	138.978	57.27									0.98	1.19	0.65	0.33	2.1	1.19	2.18	3.33	2.96	3.89									57.3	57.3	57.3	58.4	57.3	57.3	57.3	57.3	57.3	57.3
48	Glucose 1-phosphate [M-H]- C6H13O9P NIST 1170654	MS2	M+Na-2H	145.064	57.27									0	0.5	0.72	0.8	2.31	3.02	2.47	7.17	8.69	7.68									57.3	57.3	57.3	58.4	57.3	57.3	57.3	57.3	57.3	57.3
49	GUANOSINE C10H13N5O5---Guanosine C10H13N5O5---Guanosine; LC-ESI-QTOF; MS2; CE C10H13N5O5	MS1	M-H	282.084	180.18	30.5	30.44	26.47	75.98	76.96	74.71	160.95	144.72	153.45	299.31	307.12	288.61	715.1	726.27	735.4	1407.97	1335.59	1346.88	180.5	179.4	180.5	180.5	179.4	180.5	180.5	180.5	178.3	180.5	180.5	180.5	180.5	180.5	180.5	180.5	180.5	179.4	0.95	0.94	0.92	0.97	0.93	0.99	0.99	0.98
49	GUANOSINE C10H13N5O5---Guanosine C10H13N5O5---Guanosine; LC-ESI-QTOF; MS2; CE C10H13N5O5	MS2	M-H	150.042	180.18	14.74	14.56	12.78	30.54	28.93	43.01	86.38	106.33	72.78	208.16	189.59	215.41	373.75	463.35	482.88	1023.69	1017.23	832.02	180.5	179.4	180.5	180.5	179.4	180.5	180.5	180.5	178.3	180.5	180.5	180.5	180.5	180.5	180.5	180.5	180.5	179.4	0.95	0.94	0.92	0.97	0.93	0.99	0.99	0.98
49	GUANOSINE C10H13N5O5---Guanosine C10H13N5O5---Guanosine; LC-ESI-QTOF; MS2; CE C10H13N5O5	MS2	M-H	133.015	180.18	5.87	5.63	5.31	16.43	12.61	20.07	26.04	29.63	23.25	62.25	68.82	64.5	206.51	141.1	200.78	356.37	286.62	344.02	180.5	179.4	180.5	180.5	179.4	180.5	180.5	180.5	178.3	180.5	180.5	180.5	180.5	180.5	180.5	180.5	180.5	179.4	0.95	0.94	0.92	0.97	0.93	0.99	0.99	0.98
49	GUANOSINE C10H13N5O5---Guanosine C10H13N5O5---Guanosine; LC-ESI-QTOF; MS2; CE C10H13N5O5	MS2	M-H	282.085	180.18	5.38	5.33	4.04	9.27	12.6	7.9	15.24	24.65	25.7	45.22	27.57	55.4	81.76	105.38	103.4	266.46	302.45	153.39	180.5	179.4	180.5	180.5	179.4	180.5	180.5	180.5	178.3	180.5	180.5	180.5	180.5	180.5	180.5	180.5	180.5	179.4	0.95	0.94	0.92	0.97	0.93	0.99	0.99	0.98
49	GUANOSINE C10H13N5O5---Guanosine C10H13N5O5---Guanosine; LC-ESI-QTOF; MS2; CE C10H13N5O5	MS2	M-H	108.02	180.18	1.34	1.81	1.52	4.16	4.5	3.71	7.94	6.88	6.91	12.96	15.72	12.27	68.23	29.22	42.55	82.43	65.57	86.36	180.5	179.4	180.5	180.5	179.4	180.5	180.5	180.5	178.3	180.5	180.5	180.5	180.5	180.5	180.5	180.5	180.5	179.4	0.95	0.94	0.92	0.97	0.93	0.99	0.99	0.98
49	GUANOSINE C10H13N5O5---Guanosine C10H13N5O5---Guanosine; LC-ESI-QTOF; MS2; CE C10H13N5O5	MS2	M-H	107.034	180.18	0.36	0.14	0	1.51	0.83	1.41	1.77	2.78	2.09	5.52	4.15	4.21	12.66	7.99	11.78	22.88	18.31	20.4	180.5	179.4	180.5	180.5	179.4	180.5	180.5	180.5	178.3	180.5	180.5	180.5	180.5	180.5	180.5	180.5	180.5	179.4	0.95	0.94	0.92	0.97	0.93	0.99	0.99	0.98
49	GUANOSINE C10H13N5O5---Guanosine C10H13N5O5---Guanosine; LC-ESI-QTOF; MS2; CE C10H13N5O5	MS2	M-H	149.582	180.18	0	0	0.34	0	0	0	0.42	1.06	0	1.83	0.25	1.41	1.02	3.07	1.75	5.57	5.88	6.29	180.5	179.4	180.5	180.5	179.4	180.5	180.5	180.5	178.3	180.5	180.5	180.5	180.5	180.5	180.5	180.5	180.5	179.4	0.95	0.94	0.92	0.97	0.93	0.99	0.99	0.98
50	Thymidine C10H14N2O5	MS1	M+HCOO	287.088	253.62	3.39	4.33	4.73	12.62	12.71	12.5	26.82	29.32	27.93	52.58	51.76	53.64	134.45	132.1	132.27	277.75	250.39	258.61	253.6	253.6	253.6	253.1	253.1	253.1	254.2	254.2	253.1	253.1	253.1	253.1	254.2	253.1	253.1	254.2	253.1	253.1	0.96	0.88	0.93	0.92	0.96	0.97	0.93	0.94
50	Thymidine C10H14N2O5	MS2	M+HCOO	241.085	253.62	6.39	9.03	9.89	9.69	19.96	25.24	14.41	46.06	47.47	50.47	69.03	66.36	364.93	99.3	157.02	218.55	583.98	439.21	253.6	253.6	253.6	253.1	253.1	253.1	254.2	254.2	253.1	253.1	253.1	253.1	254.2	253.1	253.1	254.2	253.1	253.1	0.96	0.88	0.93	0.92	0.96	0.97	0.93	0.94
50	Thymidine C10H14N2O5	MS2	M+HCOO	125.037	253.62	1.44	4.93	3.63	8.14	9.13	9.63	8.16	17.35	18.6	25.24	44.77	34.78	91.16	66.31	100.11	138.71	158.92	158.21	253.6	253.6	253.6	253.1	253.1	253.1	254.2	254.2	253.1	253.1	253.1	253.1	254.2	253.1	253.1	254.2	253.1	253.1	0.96	0.88	0.93	0.92	0.96	0.97	0.93	0.94
50	Thymidine C10H14N2O5	MS2	M+HCOO	151.051	253.62	0	0	0	0.17	0.6	0.09	0.17	0	1.67	1.59	3.69	1.76	6.62	5.82	5.36	9.8	14.19	10.72	253.6	253.6	253.6	253.1	253.1	253.1	254.2	254.2	253.1	253.1	253.1	253.1	254.2	253.1	253.1	254.2	253.1	253.1	0.96	0.88	0.93	0.92	0.96	0.97	0.93	0.94
51	OPHTHALMIC ACID C11H19N3O6	MS1	M-H	288.12	65.86	7.41	7.1	9.88	26.02	24.38	24.58	58.38	52.01	55.91	114.22	115.64	117.24	273.78	275.23	275.4	535.45	537.28	514.47	63.9	63.9	65	65	65	65	65	65	65	65	65	65	65	65	65	65	65	65	0.98	0.84	0.89	0.99	0.98	0.95	0.95	0.98
51	OPHTHALMIC ACID C11H19N3O6	MS2	M-H	270.112	65.86	0.8	0.57	1.71	4.64	3.27	1.25	1.03	2.8	5.62	9.31	10.94	13.21	46.43	51.17	27.09	50.99	55.06	43.98	63.9	63.9	65	65	65	65	65	65	65	65	65	65	65	65	65	65	65	65	0.98	0.84	0.89	0.99	0.98	0.95	0.95	0.98
51	OPHTHALMIC ACID C11H19N3O6	MS2	M-H	195.079	65.86	1.66	0.39	0.88	1.51	1.36	1.02	2.29	3.9	7.3	10.53	8.82	5.45	26.81	38.12	22.47	41.02	40.38	42.86	63.9	63.9	65	65	65	65	65	65	65	65	65	65	65	65	65	65	65	65	0.98	0.84	0.89	0.99	0.98	0.95	0.95	0.98
51	OPHTHALMIC ACID C11H19N3O6	MS2	M-H	288.122	65.86	2.12	2.96	3.26	2.66	3.85	0.77	6.5	6.27	9.16	13.59	23.02	23.1	80.75	65.34	37.19	64.3	71.58	65.11	63.9	63.9	65	65	65	65	65	65	65	65	65	65	65	65	65	65	65	65	0.98	0.84	0.89	0.99	0.98	0.95	0.95	0.98
51	OPHTHALMIC ACID C11H19N3O6	MS2	M-H	159.076	65.86	0.8	0.57	0.62	0.7	0.92	2.59	4.09	3.3	3.67	7.31	6.98	5.72	17.32	22.57	15.86	29.85	28.41	33.02	63.9	63.9	65	65	65	65	65	65	65	65	65	65	65	65	65	65	65	65	0.98	0.84	0.89	0.99	0.98	0.95	0.95	0.98
51	OPHTHALMIC ACID C11H19N3O6	MS2	M-H	128.036	65.86	0.71	0	0.39	0.86	1.38	0.83	2.33	2.76	3.24	5.29	5.12	5.26	15.31	18.1	14.39	24.1	25.59	23.74	63.9	63.9	65	65	65	65	65	65	65	65	65	65	65	65	65	65	65	65	0.98	0.84	0.89	0.99	0.98	0.95	0.95	0.98
51	OPHTHALMIC ACID C11H19N3O6	MS2	M-H	226.125	65.86	1.15	0	0	1.42	1.94	0.63	1.57	2.72	4.15	5.76	6.34	7.03	14.16	26.44	14.47	28.62	23.32	25.51	63.9	63.9	65	65	65	65	65	65	65	65	65	65	65	65	65	65	65	65	0.98	0.84	0.89	0.99	0.98	0.95	0.95	0.98
52	Uridine C9H12N2O6 MoNA 438629	MS1	M+HCOO	289.067	108.82	0.3	0.48	0.93	1.61	1.89	3.06	4.45	5.87	4.97	10.42	10.74	10.74	29.96	31.35	30.89	58.1	63.79	60.89	108.8	108.8	108.8	108.8	108.8	108.8	109	109	107.9	109	109	109	109	109	109	109	109	109	0.93	0.86	0.94	0.98	0.99	0.96	0.97	0.97
52	Uridine C9H12N2O6 MoNA 438629	MS2	M+HCOO	243.063	108.82	9.81	5.38	2.87	11.73	14.87	10.9	28.81	33.08	21.12	53.93	62.97	53.49	161.64	124.74	183.51	349.41	116.76	184.13	108.8	108.8	108.8	108.8	108.8	108.8	109	109	107.9	109	109	109	109	109	109	109	109	109	0.93	0.86	0.94	0.98	0.99	0.96	0.97	0.97
52	Uridine C9H12N2O6 MoNA 438629	MS2	M+HCOO	110.025	108.82	1.35	2	1.21	4.79	3.29	4.64	6.32	6.56	8.4	16.94	17.49	16.57	50.86	38.46	43.96	90.84	104.17	73.36	108.8	108.8	108.8	108.8	108.8	108.8	109	109	107.9	109	109	109	109	109	109	109	109	109	0.93	0.86	0.94	0.98	0.99	0.96	0.97	0.97
52	Uridine C9H12N2O6 MoNA 438629	MS2	M+HCOO	200.056	108.82	1.13	0	1.63	5.92	5.62	4.58	7.39	8.11	6.41	15.89	16.66	14.31	61.21	40.81	47.1	95.48	67.94	54.5	108.8	108.8	108.8	108.8	108.8	108.8	109	109	107.9	109	109	109	109	109	109	109	109	109	0.93	0.86	0.94	0.98	0.99	0.96	0.97	0.97
52	Uridine C9H12N2O6 MoNA 438629	MS2	M+HCOO	111.02	108.82	2.38	2.34	2.23	7.41	4.24	5.73	9.92	7.44	8.99	17.83	19.16	15.22	55.73	37.09	40.16	85.72	90.34	69.47	108.8	108.8	108.8	108.8	108.8	108.8	109	109	107.9	109	109	109	109	109	109	109	109	109	0.93	0.86	0.94	0.98	0.99	0.96	0.97	0.97
52	Uridine C9H12N2O6 MoNA 438629	MS2	M+HCOO	152.036	108.82	0.6	0.51	0.99	0.86	3.26	1.12	2.84	2.19	2.79	3.7	3.7	4.72	15.39	13.04	11.42	29.78	25.05	21.54	108.8	108.8	108.8	108.8	108.8	108.8	109	109	107.9	109	109	109	109	109	109	109	109	109	0.93	0.86	0.94	0.98	0.99	0.96	0.97	0.97
52	Uridine C9H12N2O6 MoNA 438629	MS2	M+HCOO	122.028	108.82	0	0	0	0.58	0.23	0	0.85	0.66	0.38	1.5	3.46	1.93	7.14	3.96	2.96	6.1	8.19	8.32	108.8	108.8	108.8	108.8	108.8	108.8	109	109	107.9	109	109	109	109	109	109	109	109	109	0.93	0.86	0.94	0.98	0.99	0.96	0.97	0.97
53	5'-Methylthioadenosine C11H15N5O3S---5'-Methylthioadenosine C11H15N5O3S MassBank 5071---5'-S-Methylthioadenosine; LC-ESI-QTOF; MS2; CE C11H15N5O3S	MS1	M-H	296.082	403.24	1.22			5.82			14.25		11.72	24.16		27.35	67.13	68.54	65.38	134.21	132.45	122.53	403.2			402.7			403.8		403.8	402.7		402.7	402.7	403.8	402.7	402.7	402.7	402.7	0.95			1			1
53	5'-Methylthioadenosine C11H15N5O3S---5'-Methylthioadenosine C11H15N5O3S MassBank 5071---5'-S-Methylthioadenosine; LC-ESI-QTOF; MS2; CE C11H15N5O3S	MS2	M-H	134.048	403.24	2.74			4.79			10.33		13.08	23.52		19.8	44.98	57.33	55.74	125.24	113.11	126.5	403.2			402.7			403.8		403.8	402.7		402.7	402.7	403.8	402.7	402.7	402.7	402.7	0.95			1			1
53	5'-Methylthioadenosine C11H15N5O3S---5'-Methylthioadenosine C11H15N5O3S MassBank 5071---5'-S-Methylthioadenosine; LC-ESI-QTOF; MS2; CE C11H15N5O3S	MS2	M-H	107.036	403.24	0.36			0.07			0.29		0.36	0.22		1.41	0.9	1.08	3.03	2.74	2.6	3.42	403.2			402.7			403.8		403.8	402.7		402.7	402.7	403.8	402.7	402.7	402.7	402.7	0.95			1			1
53	ISF of 5'-Methylthioadenosine C11H15N5O3S---5'-Methylthioadenosine C11H15N5O3S MassBank 5071---5'-S-Methylthioadenosine; LC-ESI-QTOF; MS2; CE C11H15N5O3S	MS1	-	134.047	403.24		1.65					9.97	10.31	9.6	19.08	21.99	19.3	55.97	48.56	51.78	104.22	98.56	100.06		403.2					402.7	403.8	403.8	402.7	403.8	402.7	402.7	403.8	402.7	402.7	402.7	402.7		0.85					0.85	0.86
53	ISF of 5'-Methylthioadenosine C11H15N5O3S---5'-Methylthioadenosine C11H15N5O3S MassBank 5071---5'-S-Methylthioadenosine; LC-ESI-QTOF; MS2; CE C11H15N5O3S	MS2	-	134.049	403.24		0.16					1.78	1.54	2.25	3.24	3.11	1.82	6.05	5.19	5.84	10.98	8.67	12.87		403.2					402.7	403.8	403.8	402.7	403.8	402.7	402.7	403.8	402.7	402.7	402.7	402.7		0.85					0.85	0.86
53	ISF of 5'-Methylthioadenosine C11H15N5O3S---5'-Methylthioadenosine C11H15N5O3S MassBank 5071---5'-S-Methylthioadenosine; LC-ESI-QTOF; MS2; CE C11H15N5O3S	MS2	-	92.0283	403.24		0.97					0	0	0.27	0.43	0.13	0	0.6	0.27	1.3	1.53	1.97	2		403.2					402.7	403.8	403.8	402.7	403.8	402.7	402.7	403.8	402.7	402.7	402.7	402.7		0.85					0.85	0.86
53	ISF of 5'-Methylthioadenosine C11H15N5O3S---5'-Methylthioadenosine C11H15N5O3S MassBank 5071---5'-S-Methylthioadenosine; LC-ESI-QTOF; MS2; CE C11H15N5O3S	MS2	-	107.034	403.24		0.25					0.14	0.29	1.33	1.62	2.17	1.23	1.91	2.31	2.31	5.55	5.12	4.83		403.2					402.7	403.8	403.8	402.7	403.8	402.7	402.7	403.8	402.7	402.7	402.7	402.7		0.85					0.85	0.86
53	ISF of 5'-Methylthioadenosine C11H15N5O3S---5'-Methylthioadenosine C11H15N5O3S MassBank 5071---5'-S-Methylthioadenosine; LC-ESI-QTOF; MS2; CE C11H15N5O3S	MS2	-	65.0155	403.24		0					0	0	0.06	0.45	0.22	0.31	0.45	0.51	0.53	0.92	0.39	0.45		403.2					402.7	403.8	403.8	402.7	403.8	402.7	402.7	403.8	402.7	402.7	402.7	402.7		0.85					0.85	0.86
53	ISF of 5'-Methylthioadenosine C11H15N5O3S---5'-Methylthioadenosine C11H15N5O3S MassBank 5071---5'-S-Methylthioadenosine; LC-ESI-QTOF; MS2; CE C11H15N5O3S	MS2	-	107.04	403.24		0.47					0.14	0.29	1.33	1.62	2.17	1.23	1.91	2.31	2.31	5.55	5.12	4.83		403.2					402.7	403.8	403.8	402.7	403.8	402.7	402.7	403.8	402.7	402.7	402.7	402.7		0.85					0.85	0.86
54	C10-LAS (STANDARD MIX) C16H26O3S	MS1	M-H	297.153	729.63	1166.27	1217	1151.62	1006.5	1017.21	1015.33	1283.18	1322.97	1307.74	1007.5	1039.66	1003.26	1130.69	1168.59	1128.73	1182.84	1144.36	1173.95	729.4	729.4	729.4	729.4	729.4	729.4	729.4	729.4	729.4	729.4	729.4	729.4	729.4	729.4	729.4	729.4	729.4	729.4	0.99	0.97	0.99	0.99	0.99	0.99	0.99	0.98
54	C10-LAS (STANDARD MIX) C16H26O3S	MS2	M-H	297.153	729.63	976	1018.77	1097.17	886.79	869.38	891.2	1163.61	1226.88	1257.63	905.38	1106.35	886.58	1049.01	982.61	1188.18	961.44	1187.48	1051.95	729.4	729.4	729.4	729.4	729.4	729.4	729.4	729.4	729.4	729.4	729.4	729.4	729.4	729.4	729.4	729.4	729.4	729.4	0.99	0.97	0.99	0.99	0.99	0.99	0.99	0.98
54	C10-LAS (STANDARD MIX) C16H26O3S	MS2	M-H	183.013	729.63	405.32	319.95	475.82	337.6	343.17	371.81	456.05	459.34	413.75	357.37	324.14	339.43	367.54	370.29	346.03	433.61	533.97	433.9	729.4	729.4	729.4	729.4	729.4	729.4	729.4	729.4	729.4	729.4	729.4	729.4	729.4	729.4	729.4	729.4	729.4	729.4	0.99	0.97	0.99	0.99	0.99	0.99	0.99	0.98
54	C10-LAS (STANDARD MIX) C16H26O3S	MS2	M-H	170.002	729.63	7.31	5.63	10.54	8.68	7.99	9.71	9.63	9.13	9.12	10.03	7.18	9.53	11.33	9.87	7.76	12.42	10.99	9.53	729.4	729.4	729.4	729.4	729.4	729.4	729.4	729.4	729.4	729.4	729.4	729.4	729.4	729.4	729.4	729.4	729.4	729.4	0.99	0.97	0.99	0.99	0.99	0.99	0.99	0.98
54	C10-LAS (STANDARD MIX) C16H26O3S	MS2	M-H	119.052	729.63	4.13	3.35	4.79	4.96	4.72	4.11	5.74	4.26	6.2	5.66	3	4.86	4.03	3.64	5.62	5.2	6.31	4.48	729.4	729.4	729.4	729.4	729.4	729.4	729.4	729.4	729.4	729.4	729.4	729.4	729.4	729.4	729.4	729.4	729.4	729.4	0.99	0.97	0.99	0.99	0.99	0.99	0.99	0.98
54	C10-LAS (STANDARD MIX) C16H26O3S	MS2	M-H	184.017	729.63	83.52	80.5	99.95	72.57	73.34	75.46	103.36	95.43	86.69	76.88	64.6	69.51	74.47	72.36	66.86	84.06	100.56	80.32	729.4	729.4	729.4	729.4	729.4	729.4	729.4	729.4	729.4	729.4	729.4	729.4	729.4	729.4	729.4	729.4	729.4	729.4	0.99	0.97	0.99	0.99	0.99	0.99	0.99	0.98
54	C10-LAS (STANDARD MIX) C16H26O3S	MS2	M-H	197.032	729.63	15.57	15.5	16.19	13.17	11.47	14.02	15.66	18.23	17.3	13.48	11.11	13.97	14.39	15.9	14.27	13.88	17.83	17.17	729.4	729.4	729.4	729.4	729.4	729.4	729.4	729.4	729.4	729.4	729.4	729.4	729.4	729.4	729.4	729.4	729.4	729.4	0.99	0.97	0.99	0.99	0.99	0.99	0.99	0.98
55	Cytidine 2',3'-cyclic monophosphoric acid [M-H]- C9H12N3O7P NIST 1159640---Cytidine 2',3'-cyclic monophosphoric acid [M-H]- C9H12N3O7P NIST 1159641---Cytidine 2',3'-cyclic monophosphoric acid [M-H]- C9H12N3O7P NIST 1159642	MS1	M-H	304.034	64.45	4.98	5.75		14.24	10.86	13.96	32.81	29.47	31.99	62.19	63.19	61.11	151.33	160.46	157.85	300.46	297.36	304.13	63.9	64.5		65	63.9	63.9	63.9	65	65	65	65	65	65	65	65	65	65	65	0.87	0.92		0.87	0.93	0.96	0.98	0.98
55	Cytidine 2',3'-cyclic monophosphoric acid [M-H]- C9H12N3O7P NIST 1159640---Cytidine 2',3'-cyclic monophosphoric acid [M-H]- C9H12N3O7P NIST 1159641---Cytidine 2',3'-cyclic monophosphoric acid [M-H]- C9H12N3O7P NIST 1159642	MS2	M-H	110.035	64.45	2.23	4.01		5.39	3.71	7.34	12.6	12.39	17.5	30.71	37.85	37.61	103.97	134.56	82.03	167.43	154.34	145.15	63.9	64.5		65	63.9	63.9	63.9	65	65	65	65	65	65	65	65	65	65	65	0.87	0.92		0.87	0.93	0.96	0.98	0.98
55	Cytidine 2',3'-cyclic monophosphoric acid [M-H]- C9H12N3O7P NIST 1159640---Cytidine 2',3'-cyclic monophosphoric acid [M-H]- C9H12N3O7P NIST 1159641---Cytidine 2',3'-cyclic monophosphoric acid [M-H]- C9H12N3O7P NIST 1159642	MS2	M-H	67.03	64.45	0.23	0.06		0.06	0	0.45	0.63	0.51	0.45	1.86	0.92	0.46	3.52	4.66	2.27	8.95	5.43	6.27	63.9	64.5		65	63.9	63.9	63.9	65	65	65	65	65	65	65	65	65	65	65	0.87	0.92		0.87	0.93	0.96	0.98	0.98
55	Cytidine 2',3'-cyclic monophosphoric acid [M-H]- C9H12N3O7P NIST 1159640---Cytidine 2',3'-cyclic monophosphoric acid [M-H]- C9H12N3O7P NIST 1159641---Cytidine 2',3'-cyclic monophosphoric acid [M-H]- C9H12N3O7P NIST 1159642	MS2	M-H	304.04	64.45	0.73	0.49		1.83	0.73	0	0.91	1.33	1.22	2.37	3.64	5.1	15.71	12.41	6.87	13.77	14.72	15.59	63.9	64.5		65	63.9	63.9	63.9	65	65	65	65	65	65	65	65	65	65	65	0.87	0.92		0.87	0.93	0.96	0.98	0.98
55	Cytidine 2',3'-cyclic monophosphoric acid [M-H]- C9H12N3O7P NIST 1159640---Cytidine 2',3'-cyclic monophosphoric acid [M-H]- C9H12N3O7P NIST 1159641---Cytidine 2',3'-cyclic monophosphoric acid [M-H]- C9H12N3O7P NIST 1159642	MS2	M-H	192.989	64.45	0	0.68		0	0	0	0	0.29	0.29	0.77	1.45	0.19	3.24	3.49	1.83	3.19	6.38	2.52	63.9	64.5		65	63.9	63.9	63.9	65	65	65	65	65	65	65	65	65	65	65	0.87	0.92		0.87	0.93	0.96	0.98	0.98
56	Guanosine; LC-ESI-QTOF; MS2; CE C10H13N5O5	MS1	M+Na-2H	304.066	180.18	0.26			2	1.76	1.27	4.14	3.89	4.1	8.42	8.28	8.11	22.04	20.93	19.75	31.36	30.52	31.61	180.2			180.2	180.2	180.2	180.2	180.2	178.3	180.5	180.5	180.5	180.5	180.5	180.5	180.5	179.4	179.4	0.62			0.65	0.62	0.66	0.68	0.66
56	Guanosine; LC-ESI-QTOF; MS2; CE C10H13N5O5	MS2	M+Na-2H	172.025	180.18	0			0.09	0	0.46	0.14	1.69	1	2.37	1.55	2.33	4.71	4.71	7.7	10.78	10.58	6.99	180.2			180.2	180.2	180.2	180.2	180.2	178.3	180.5	180.5	180.5	180.5	180.5	180.5	180.5	179.4	179.4	0.62			0.65	0.62	0.66	0.68	0.66
56	Guanosine; LC-ESI-QTOF; MS2; CE C10H13N5O5	MS2	M+Na-2H	150.041	180.18	14.74			30.88	28.93	43.27	86.64	107.42	71.48	205.44	187.56	215.41	373.75	463.35	482.88	1023.69	1011.78	832.02	180.2			180.2	180.2	180.2	180.2	180.2	178.3	180.5	180.5	180.5	180.5	180.5	180.5	180.5	179.4	179.4	0.62			0.65	0.62	0.66	0.68	0.66
56	Guanosine; LC-ESI-QTOF; MS2; CE C10H13N5O5	MS2	M+Na-2H	304.222	180.18	14.97			16.66	9.69	16.24	12.12	20.25	4.75	3.28	4.01	6.1	5.47	10.96	7.99	7.12	0	6.61	180.2			180.2	180.2	180.2	180.2	180.2	178.3	180.5	180.5	180.5	180.5	180.5	180.5	180.5	179.4	179.4	0.62			0.65	0.62	0.66	0.68	0.66
56	Guanosine; LC-ESI-QTOF; MS2; CE C10H13N5O5	MS2	M+Na-2H	133.021	180.18	5.95			16.55	12.61	20.07	26.04	30.6	23.05	61.45	67.82	64.5	206.51	141.1	200.78	356.37	285.17	344.02	180.2			180.2	180.2	180.2	180.2	180.2	178.3	180.5	180.5	180.5	180.5	180.5	180.5	180.5	179.4	179.4	0.62			0.65	0.62	0.66	0.68	0.66
56	Guanosine; LC-ESI-QTOF; MS2; CE C10H13N5O5	MS2	M+Na-2H	304.076	180.18	0			0	0	0	0.73	0	0	0	0.61	0.85	1.46	0.36	0.24	4.49	2.12	0	180.2			180.2	180.2	180.2	180.2	180.2	178.3	180.5	180.5	180.5	180.5	180.5	180.5	180.5	179.4	179.4	0.62			0.65	0.62	0.66	0.68	0.66
56	Guanosine; LC-ESI-QTOF; MS2; CE C10H13N5O5	MS2	M+Na-2H	304.066	180.18	0			0	0	0	0.73	0	0	2.13	1.34	1.09	1.82	1.46	2.66	4.73	4.13	3.15	180.2			180.2	180.2	180.2	180.2	180.2	178.3	180.5	180.5	180.5	180.5	180.5	180.5	180.5	179.4	179.4	0.62			0.65	0.62	0.66	0.68	0.66
57	C12-AE1S (TENTATIVE) C14H30O5S	MS1	M-H	309.173	746.9	94.78	93.96	95.49	101.34	93.22	93.21	95.95	105.34	100.24	110.38	104.09	101	117.32	113.07	114.02	116.77	113.58	117.73	745.9	745.9	745.9	747	745.9	745.9	745.9	745.9	745.9	745.9	745.9	745.9	745.9	745.9	745.9	745.9	745.9	745.9	0.6	0.66	0.65	0.61	0.64	0.65	0.59	0.62
57	C12-AE1S (TENTATIVE) C14H30O5S	MS2	M-H	309.172	746.9	92.1	57.52	76.79	72.98	62.24	53.2	50.23	56.73	66.93	73.36	82.62	57.47	76.67	66.57	73.31	82.98	79.82	78.12	745.9	745.9	745.9	747	745.9	745.9	745.9	745.9	745.9	745.9	745.9	745.9	745.9	745.9	745.9	745.9	745.9	745.9	0.6	0.66	0.65	0.61	0.64	0.65	0.59	0.62
57	C12-AE1S (TENTATIVE) C14H30O5S	MS2	M-H	96.9605	746.9	8.2	9.76	6.97	9.44	9.66	10.45	8.48	8.93	14.36	18.89	8.17	12.88	11.08	11.35	13.06	13.3	14.15	12.97	745.9	745.9	745.9	747	745.9	745.9	745.9	745.9	745.9	745.9	745.9	745.9	745.9	745.9	745.9	745.9	745.9	745.9	0.6	0.66	0.65	0.61	0.64	0.65	0.59	0.62
57	C12-AE1S (TENTATIVE) C14H30O5S	MS2	M-H	311.172	746.9	1591.44	1266.51	1562.34	1349.82	1187.4	1192.06	1352.69	1427.43	1382.22	898.89	1013.91	978.25	1101.5	1219.29	1082.02	1121.45	1087.49	948.23	745.9	745.9	745.9	747	745.9	745.9	745.9	745.9	745.9	745.9	745.9	745.9	745.9	745.9	745.9	745.9	745.9	745.9	0.6	0.66	0.65	0.61	0.64	0.65	0.59	0.62
57	C12-AE1S (TENTATIVE) C14H30O5S	MS2	M-H	122.974	746.9	0	0.85	1	0.69	0.89	0.38	0.08	1.24	0.54	1.08	0.38	0.73	1.24	0.66	1.08	0.73	0.47	0.77	745.9	745.9	745.9	747	745.9	745.9	745.9	745.9	745.9	745.9	745.9	745.9	745.9	745.9	745.9	745.9	745.9	745.9	0.6	0.66	0.65	0.61	0.64	0.65	0.59	0.62
57	C12-AE1S (TENTATIVE) C14H30O5S	MS2	M-H	104.984	746.9	1	1.95	1.74	1.6	0.71	2.23	2.46	2.21	2.06	2.6	1.43	2.24	2.48	2.18	2.92	1.32	0.88	1.28	745.9	745.9	745.9	747	745.9	745.9	745.9	745.9	745.9	745.9	745.9	745.9	745.9	745.9	745.9	745.9	745.9	745.9	0.6	0.66	0.65	0.61	0.64	0.65	0.59	0.62
57	C12-AE1S (TENTATIVE) C14H30O5S	MS2	M-H	79.957	746.9	1.18	2.24	1.24	1.43	0.81	1.95	1.84	2.27	2.18	2.27	0.56	1.81	1.65	2.12	0.9	1.59	1.28	1.74	745.9	745.9	745.9	747	745.9	745.9	745.9	745.9	745.9	745.9	745.9	745.9	745.9	745.9	745.9	745.9	745.9	745.9	0.6	0.66	0.65	0.61	0.64	0.65	0.59	0.62
58	C11-LAS (STANDARD MIX) C17H28O3S	MS1	M-H	311.168	749.97	4023.26	4011.28	3952.79	3410.05	3421.62	3297.02	4272.3	4393.92	4299.61	3242.95	3146.69	3278.47	3624.91	3517.85	3472.48	3282.1	3398.54	3203.73	750.3	750.3	750.3	750.3	750.3	750.3	750.3	750.3	750.3	750.3	750.3	750.3	750.3	750.3	750.3	750.3	750.3	750.3	0.99	0.98	0.99	0.99	0.99	0.99	1	1
58	C11-LAS (STANDARD MIX) C17H28O3S	MS2	M-H	311.17	749.97	3826.25	4012.58	3338.94	3573.3	3452.56	3333.64	4114.09	4257.61	4095.18	3419.81	3125.9	3045.01	3048.91	3573.03	3725.48	3182.6	3761.46	3520.22	750.3	750.3	750.3	750.3	750.3	750.3	750.3	750.3	750.3	750.3	750.3	750.3	750.3	750.3	750.3	750.3	750.3	750.3	0.99	0.98	0.99	0.99	0.99	0.99	1	1
58	C11-LAS (STANDARD MIX) C17H28O3S	MS2	M-H	183.013	749.97	1394.94	1552.04	1275.77	1313.01	1105.96	1202.32	1648.09	1333.33	1487.2	974.82	1250.05	1209.3	1285.11	1322.32	1260.52	1129.29	1087.69	1075.99	750.3	750.3	750.3	750.3	750.3	750.3	750.3	750.3	750.3	750.3	750.3	750.3	750.3	750.3	750.3	750.3	750.3	750.3	0.99	0.98	0.99	0.99	0.99	0.99	1	1
58	C11-LAS (STANDARD MIX) C17H28O3S	MS2	M-H	119.051	749.97	27.36	28.76	30.26	24.87	24.85	23.66	36.06	25.02	27.48	19.13	22.55	22.42	25.92	27.29	25.36	21.73	25.4	20.86	750.3	750.3	750.3	750.3	750.3	750.3	750.3	750.3	750.3	750.3	750.3	750.3	750.3	750.3	750.3	750.3	750.3	750.3	0.99	0.98	0.99	0.99	0.99	0.99	1	1
58	C11-LAS (STANDARD MIX) C17H28O3S	MS2	M-H	239.076	749.97	25.33	26.06	20.92	22.59	17.46	18.87	24.05	21.04	21.75	17.55	22.33	20.53	19.38	22.21	23.56	15.66	16.15	14.61	750.3	750.3	750.3	750.3	750.3	750.3	750.3	750.3	750.3	750.3	750.3	750.3	750.3	750.3	750.3	750.3	750.3	750.3	0.99	0.98	0.99	0.99	0.99	0.99	1	1
58	C11-LAS (STANDARD MIX) C17H28O3S	MS2	M-H	170.004	749.97	30.93	40.5	38.82	35.37	27.28	30.57	43.2	39.02	46.4	22.06	29.97	30.47	33.57	32.49	33.57	33.57	33.32	30.13	750.3	750.3	750.3	750.3	750.3	750.3	750.3	750.3	750.3	750.3	750.3	750.3	750.3	750.3	750.3	750.3	750.3	750.3	0.99	0.98	0.99	0.99	0.99	0.99	1	1
58	C11-LAS (STANDARD MIX) C17H28O3S	MS2	M-H	225.061	749.97	18.38	23.11	20.4	17.29	15.88	15.26	22.37	20.89	19.28	14.48	15.88	19.21	15.41	17.08	20.09	17.24	15.85	13.66	750.3	750.3	750.3	750.3	750.3	750.3	750.3	750.3	750.3	750.3	750.3	750.3	750.3	750.3	750.3	750.3	750.3	750.3	0.99	0.98	0.99	0.99	0.99	0.99	1	1
59	Adenosine C10H13N5O4 MoNA 436594	MS1	M+HCOO	312.094	274.05					4.92	5.28	13.17	12.86	11.04	27.17	24.36	24.82	69.08	68.69	66.8	131.48	130.09	131.6					272.9	274	272.9	274	272.9	272.9	274	274	274	272.9	272.9	272.9	272.9	272.9					0.98	0.97	0.98	0.99
59	Adenosine C10H13N5O4 MoNA 436594	MS2	M+HCOO	134.047	274.05					14.61	8.4	29.2	30.19	16.34	50.34	46.86	49.14	126.35	131.52	116.34	267.47	273.52	196.94					272.9	274	272.9	274	272.9	272.9	274	274	274	272.9	272.9	272.9	272.9	272.9					0.98	0.97	0.98	0.99
59	Adenosine C10H13N5O4 MoNA 436594	MS2	M+HCOO	266.09	274.05					0.91	0.34	0.34	1.59	1.25	2.04	0.74	3.41	11.86	9.64	5.86	19.55	15.96	11.35					272.9	274	272.9	274	272.9	272.9	274	274	274	272.9	272.9	272.9	272.9	272.9					0.98	0.97	0.98	0.99
59	Adenosine C10H13N5O4 MoNA 436594	MS2	M+HCOO	107.038	274.05					0	0	0.4	0	0	0.22	0.43	0.9	1.29	2.42	1.47	3.31	2.62	3.1					272.9	274	272.9	274	272.9	272.9	274	274	274	272.9	272.9	272.9	272.9	272.9					0.98	0.97	0.98	0.99
59	Adenosine C10H13N5O4 MoNA 436594	MS2	M+HCOO	133.64	274.05					0	0	0.32	0	0.32	0	0	0.49	0.56	1.04	0.24	1.01	1.65	0.88					272.9	274	272.9	274	272.9	272.9	274	274	274	272.9	272.9	272.9	272.9	272.9					0.98	0.97	0.98	0.99
59	Adenosine C10H13N5O4 MoNA 436594	MS2	M+HCOO	92.0233	274.05					0.13	0	0	0	0	0	0	0	0	0	0	0.2	0	0					272.9	274	272.9	274	272.9	272.9	274	274	274	272.9	272.9	272.9	272.9	272.9					0.98	0.97	0.98	0.99
59	Adenosine C10H13N5O4 MoNA 436594	MS2	M+HCOO	312.096	274.05					0	0	0.25	0	0.12	0	0	0	0.62	1.41	0	1.97	0.98	2.83					272.9	274	272.9	274	272.9	272.9	274	274	274	272.9	272.9	272.9	272.9	272.9					0.98	0.97	0.98	0.99
60	Guanosine C10H13N5O5 MassBank 3018	MS1	M+Cl	318.06	181.06					0.08		0.18	0.28		1.12	1.09	1.37	2.63	3.74	3.25	5.98	5.45	5.41					181.1		181.1	181.1		181.1	181.1	181.1	181.1	181.1	181.1	180.5	179.4	179.4					0.98		0.97	0.97
60	Guanosine C10H13N5O5 MassBank 3018	MS2	M+Cl	282.091	181.06					9.13		14.58	11.57		44.49	27.02	41.81	123.87	76.74	80.31	132.84	141.77	174.8					181.1		181.1	181.1		181.1	181.1	181.1	181.1	181.1	181.1	180.5	179.4	179.4					0.98		0.97	0.97
60	Guanosine C10H13N5O5 MassBank 3018	MS2	M+Cl	150.041	181.06					11.01		31.76	24.61		54.12	50.36	36.01	151.43	148.55	90.61	196.48	240.78	244.19					181.1		181.1	181.1		181.1	181.1	181.1	181.1	181.1	181.1	180.5	179.4	179.4					0.98		0.97	0.97
60	Guanosine C10H13N5O5 MassBank 3018	MS2	M+Cl	133.017	181.06					0.76		2.77	4.26		6.75	8.37	6.35	20.54	15.75	13.14	21.43	25.63	38.89					181.1		181.1	181.1		181.1	181.1	181.1	181.1	181.1	181.1	180.5	179.4	179.4					0.98		0.97	0.97
61	5-Thymidylic acid C10H15N2O8P MassBank 5092---Thymidine??5'-monophosphate C10H15N2O8P	MS1	M-H	321.049	94.03		4.94	4.18	11.36	11.98	12.49	30.09	29.14	32.84	60	60.64	58.38	162.04	152.44	163.02	300.12	317.75	314.86		94	94	94.7	93.6	94.7	93.6	94.7	92.5	94.7	93.6	93.6	93.6	93.6	94.7	92.5	93.6	92.5		0.77	0.89	0.78	0.91	0.74	0.99	0.97
61	5-Thymidylic acid C10H15N2O8P MassBank 5092---Thymidine??5'-monophosphate C10H15N2O8P	MS2	M-H	78.9591	94.03		0.49	0.99	0.9	1.36	1.58	4.68	6.66	4.24	5.73	8.44	6.58	21.78	22.28	17.16	39.26	30.83	32.7		94	94	94.7	93.6	94.7	93.6	94.7	92.5	94.7	93.6	93.6	93.6	93.6	94.7	92.5	93.6	92.5		0.77	0.89	0.78	0.91	0.74	0.99	0.97
61	5-Thymidylic acid C10H15N2O8P MassBank 5092---Thymidine??5'-monophosphate C10H15N2O8P	MS2	M-H	195.007	94.03		1.16	0.39	1.75	0.87	0	4.72	6.28	4.97	10.11	12.71	12.64	26.28	25.92	28.99	63.69	39.53	61.5		94	94	94.7	93.6	94.7	93.6	94.7	92.5	94.7	93.6	93.6	93.6	93.6	94.7	92.5	93.6	92.5		0.77	0.89	0.78	0.91	0.74	0.99	0.97
61	5-Thymidylic acid C10H15N2O8P MassBank 5092---Thymidine??5'-monophosphate C10H15N2O8P	MS2	M-H	125.035	94.03		0	0.62	0	1.98	0.31	3.5	4.92	3.66	6.46	8.22	6.78	20.51	16.11	17.7	43.56	35.19	43.91		94	94	94.7	93.6	94.7	93.6	94.7	92.5	94.7	93.6	93.6	93.6	93.6	94.7	92.5	93.6	92.5		0.77	0.89	0.78	0.91	0.74	0.99	0.97
61	5-Thymidylic acid C10H15N2O8P MassBank 5092---Thymidine??5'-monophosphate C10H15N2O8P	MS2	M-H	321.052	94.03		1.75	1.99	3.43	1.62	3.44	7.79	8.37	11.29	15.72	15.84	17.02	40.33	43.16	56.52	77.55	50.61	72.87		94	94	94.7	93.6	94.7	93.6	94.7	92.5	94.7	93.6	93.6	93.6	93.6	94.7	92.5	93.6	92.5		0.77	0.89	0.78	0.91	0.74	0.99	0.97
61	5-Thymidylic acid C10H15N2O8P MassBank 5092---Thymidine??5'-monophosphate C10H15N2O8P	MS2	M-H	176.995	94.03		0	0.46	0	0.65	0	1.85	0.79	1.48	1.11	4.54	3.15	6.35	9.79	8.71	18.97	18.09	18.8		94	94	94.7	93.6	94.7	93.6	94.7	92.5	94.7	93.6	93.6	93.6	93.6	94.7	92.5	93.6	92.5		0.77	0.89	0.78	0.91	0.74	0.99	0.97
61	5-Thymidylic acid C10H15N2O8P MassBank 5092---Thymidine??5'-monophosphate C10H15N2O8P	MS2	M-H	96.9698	94.03		0.41	0	0	0	0.27	1.27	2.29	1.27	2.64	2.6	1.68	10.32	8.92	3.36	11.65	11.23	11.59		94	94	94.7	93.6	94.7	93.6	94.7	92.5	94.7	93.6	93.6	93.6	93.6	94.7	92.5	93.6	92.5		0.77	0.89	0.78	0.91	0.74	0.99	0.97
62	URIDINE-5-MONOPHOSPHATE C9H13N2O9P---Uridine 5'-monophosphate [M-H]- C9H13N2O9P NIST 1173795	MS1	M-H	323.028	60.21	22.86	22.89	19.98	60.98	56.78	54.2	112.92	116.32	118.94	221.46	229.81	222.02	524.65	509.4	508.25	950.74	942.78	937.16	60.6	60.6	60.6	60.6	60.6	60.6	60.6	60.6	60.6	60.6	60.6	60.6	60.6	60.6	60.6	60.6	60.6	59.5	0.96	0.91	0.96	0.95	0.87	0.97	0.97	0.97
62	URIDINE-5-MONOPHOSPHATE C9H13N2O9P---Uridine 5'-monophosphate [M-H]- C9H13N2O9P NIST 1173795	MS2	M-H	78.9595	60.21	2.35	3.31	2.7	6.9	6.87	5.92	17.49	13.07	15.11	29.59	31.9	29.88	45.46	82.78	51.11	137.86	130.75	127.83	60.6	60.6	60.6	60.6	60.6	60.6	60.6	60.6	60.6	60.6	60.6	60.6	60.6	60.6	60.6	60.6	60.6	59.5	0.96	0.91	0.96	0.95	0.87	0.97	0.97	0.97
62	URIDINE-5-MONOPHOSPHATE C9H13N2O9P---Uridine 5'-monophosphate [M-H]- C9H13N2O9P NIST 1173795	MS2	M-H	96.9698	60.21	1.62	1.99	1.95	5.32	4.91	4.9	15.84	11.46	15.19	26.56	26.26	25.03	42.91	70.49	49.87	117.85	118.81	140.38	60.6	60.6	60.6	60.6	60.6	60.6	60.6	60.6	60.6	60.6	60.6	60.6	60.6	60.6	60.6	60.6	60.6	59.5	0.96	0.91	0.96	0.95	0.87	0.97	0.97	0.97
62	URIDINE-5-MONOPHOSPHATE C9H13N2O9P---Uridine 5'-monophosphate [M-H]- C9H13N2O9P NIST 1173795	MS2	M-H	323.029	60.21	4.82	8.88	6.07	9.18	20.72	13.52	24.31	24.24	37.8	50.91	71.43	66.86	133.95	161.46	129.25	218.54	236.39	154.25	60.6	60.6	60.6	60.6	60.6	60.6	60.6	60.6	60.6	60.6	60.6	60.6	60.6	60.6	60.6	60.6	60.6	59.5	0.96	0.91	0.96	0.95	0.87	0.97	0.97	0.97
62	URIDINE-5-MONOPHOSPHATE C9H13N2O9P---Uridine 5'-monophosphate [M-H]- C9H13N2O9P NIST 1173795	MS2	M-H	111.02	60.21	1.46	1.17	1.1	2.31	2.35	1.8	7.1	5.9	4.51	9.5	9.77	9.87	16.06	21.32	15.16	30.76	31.84	33.64	60.6	60.6	60.6	60.6	60.6	60.6	60.6	60.6	60.6	60.6	60.6	60.6	60.6	60.6	60.6	60.6	60.6	59.5	0.96	0.91	0.96	0.95	0.87	0.97	0.97	0.97
62	URIDINE-5-MONOPHOSPHATE C9H13N2O9P---Uridine 5'-monophosphate [M-H]- C9H13N2O9P NIST 1173795	MS2	M-H	211.004	60.21	0.4	0.5	0.35	2.43	3.33	2.23	5.62	5.15	4.96	12.44	10.63	11.16	22.34	27.26	21.62	46.04	44.51	40.41	60.6	60.6	60.6	60.6	60.6	60.6	60.6	60.6	60.6	60.6	60.6	60.6	60.6	60.6	60.6	60.6	60.6	59.5	0.96	0.91	0.96	0.95	0.87	0.97	0.97	0.97
62	URIDINE-5-MONOPHOSPHATE C9H13N2O9P---Uridine 5'-monophosphate [M-H]- C9H13N2O9P NIST 1173795	MS2	M-H	280.023	60.21	0.58	0	0	0.58	0.58	1.97	0.35	3.39	2.51	4.89	6.23	5.42	10.31	14.02	11.02	23.78	21.48	19.07	60.6	60.6	60.6	60.6	60.6	60.6	60.6	60.6	60.6	60.6	60.6	60.6	60.6	60.6	60.6	60.6	60.6	59.5	0.96	0.91	0.96	0.95	0.87	0.97	0.97	0.97
63	4-Dodecylbenzenesulfonic Acid C18H30O3S MoNA 440645	MS1	M-H	325.184	768.22	3693.74	3591	3554.28	3172.79	3113.59	3227.08	4003.45	4030.36	3931.22	2897.98	2873.02	2929.32	3382.87	3272.91	3221.88	2971.03	2811.88	2774.49	767.9	767.9	767.9	767.9	767.9	767.9	767.9	767.9	767.9	767.9	767.9	767.9	767.9	767.9	767.9	767.9	767.9	767.9	0.99	1	1	1	1	0.99	1	1
63	4-Dodecylbenzenesulfonic Acid C18H30O3S MoNA 440645	MS2	M-H	325.184	768.22	4471.8	4046.45	4142.12	3833.71	3492.06	3727.92	4878.45	4378.93	4768.07	3660.67	3266.2	3494.82	3798.28	3907.53	3592.25	3409.35	3156.14	3135.23	767.9	767.9	767.9	767.9	767.9	767.9	767.9	767.9	767.9	767.9	767.9	767.9	767.9	767.9	767.9	767.9	767.9	767.9	0.99	1	1	1	1	0.99	1	1
63	4-Dodecylbenzenesulfonic Acid C18H30O3S MoNA 440645	MS2	M-H	183.012	768.22	953	912.96	1009.09	862.69	922.41	889.76	1182.86	1032.9	1087.95	790.51	859.38	914.04	935.72	876.25	944.92	773.67	820.24	790.92	767.9	767.9	767.9	767.9	767.9	767.9	767.9	767.9	767.9	767.9	767.9	767.9	767.9	767.9	767.9	767.9	767.9	767.9	0.99	1	1	1	1	0.99	1	1
63	4-Dodecylbenzenesulfonic Acid C18H30O3S MoNA 440645	MS2	M-H	198.036	768.22	22.5	22.74	25.42	23.26	22.52	22.44	24.23	26.88	25.99	21.29	19.69	21.01	26.11	22.08	23.46	21.35	20.68	17.79	767.9	767.9	767.9	767.9	767.9	767.9	767.9	767.9	767.9	767.9	767.9	767.9	767.9	767.9	767.9	767.9	767.9	767.9	0.99	1	1	1	1	0.99	1	1
63	4-Dodecylbenzenesulfonic Acid C18H30O3S MoNA 440645	MS2	M-H	119.049	768.22	13.16	7.42	10	7.35	8.12	7.92	11.93	11.47	9.65	9.02	8.32	10.57	10.84	8.67	10.43	8.48	9.08	5.45	767.9	767.9	767.9	767.9	767.9	767.9	767.9	767.9	767.9	767.9	767.9	767.9	767.9	767.9	767.9	767.9	767.9	767.9	0.99	1	1	1	1	0.99	1	1
63	4-Dodecylbenzenesulfonic Acid C18H30O3S MoNA 440645	MS2	M-H	197.03	768.22	35.9	26.95	42.94	39.38	40.98	36.38	46.84	40.83	47.63	37.05	36.79	36.82	46.69	40.73	38.9	40.97	36.1	32.33	767.9	767.9	767.9	767.9	767.9	767.9	767.9	767.9	767.9	767.9	767.9	767.9	767.9	767.9	767.9	767.9	767.9	767.9	0.99	1	1	1	1	0.99	1	1
63	4-Dodecylbenzenesulfonic Acid C18H30O3S MoNA 440645	MS2	M-H	261.219	768.22	13.99	12.38	14.34	11.08	8.48	10.26	17.57	11.51	9.8	10.98	13	14.06	14.5	10.92	13.32	10.15	10.91	12.71	767.9	767.9	767.9	767.9	767.9	767.9	767.9	767.9	767.9	767.9	767.9	767.9	767.9	767.9	767.9	767.9	767.9	767.9	0.99	1	1	1	1	0.99	1	1
64	1-Methyladenosine C11H15N5O4	MS1	M+HCOO	326.11	113.5										8.5					27.83	56.65	59.43	60.09										113.4					114.5	113.4	113.4	113.4
64	1-Methyladenosine C11H15N5O4	MS2	M+HCOO	148.063	113.5										14.15					51.4	110.56	76.37	88.14										113.4					114.5	113.4	113.4	113.4
64	1-Methyladenosine C11H15N5O4	MS2	M+HCOO	107.038	113.5										0					0.87	1.55	1.34	0.75										113.4					114.5	113.4	113.4	113.4
64	1-Methyladenosine C11H15N5O4	MS2	M+HCOO	132.034	113.5										0					0	0	0	0										113.4					114.5	113.4	113.4	113.4
64	1-Methyladenosine C11H15N5O4	MS2	M+HCOO	207.96	113.5										0					0	3.66	0	2.32										113.4					114.5	113.4	113.4	113.4
64	1-Methyladenosine C11H15N5O4	MS2	M+HCOO	133.037	113.5										0.16					0.32	0.36	0.24	0										113.4					114.5	113.4	113.4	113.4
65	N6-Methyladenosine C11H15N5O4	MS1	M+HCOO	326.11	343.71	15.25	14.99		40.61	39.86	38.75	81.21	78.59	83.04	169.87	166.76	168.64	411.82	416.67	404.9	822.8	808.03	808.46	343.3	343.3		343.3	343.3	343.3	343.3	343.3	343.3	342.2	343.3	343.3	343.3	343.3	343.3	343.3	343.3	343.3	0.98	0.97		0.99	0.97	0.99	0.99	0.98
65	N6-Methyladenosine C11H15N5O4	MS2	M+HCOO	148.063	343.71	20.54	18.81		38.7	50.41	44.47	123.75	98.36	125.45	239.9	239.59	222.28	621.65	650.45	563.17	1358.38	830.86	937.04	343.3	343.3		343.3	343.3	343.3	343.3	343.3	343.3	342.2	343.3	343.3	343.3	343.3	343.3	343.3	343.3	343.3	0.98	0.97		0.99	0.97	0.99	0.99	0.98
65	N6-Methyladenosine C11H15N5O4	MS2	M+HCOO	133.039	343.71	0.24	0.64		1.41	1.77	1.81	3.25	1.65	2.86	6.61	7.59	5.79	12.15	18.41	15.24	44.94	25.4	27.07	343.3	343.3		343.3	343.3	343.3	343.3	343.3	343.3	342.2	343.3	343.3	343.3	343.3	343.3	343.3	343.3	343.3	0.98	0.97		0.99	0.97	0.99	0.99	0.98
65	N6-Methyladenosine C11H15N5O4	MS2	M+HCOO	280.107	343.71	0.7	0.7		0.58	0	0.41	4.37	2.57	2.33	8.21	5.29	7.46	19.27	13.26	11.6	59.86	24.44	23.51	343.3	343.3		343.3	343.3	343.3	343.3	343.3	343.3	342.2	343.3	343.3	343.3	343.3	343.3	343.3	343.3	343.3	0.98	0.97		0.99	0.97	0.99	0.99	0.98
65	N6-Methyladenosine C11H15N5O4	MS2	M+HCOO	146.045	343.71	0.17	0		0	0	0	0.25	0	0.25	0.72	0.67	1.01	2.07	3.25	1.43	4.04	3.42	3.79	343.3	343.3		343.3	343.3	343.3	343.3	343.3	343.3	342.2	343.3	343.3	343.3	343.3	343.3	343.3	343.3	343.3	0.98	0.97		0.99	0.97	0.99	0.99	0.98
65	N6-Methyladenosine C11H15N5O4	MS2	M+HCOO	147.61	343.71	0.51	0		0	0	0.25	0.97	0.93	0.25	0.89	1.53	1.43	2.42	3.98	4.14	7.57	4.87	5.63	343.3	343.3		343.3	343.3	343.3	343.3	343.3	343.3	342.2	343.3	343.3	343.3	343.3	343.3	343.3	343.3	343.3	0.98	0.97		0.99	0.97	0.99	0.99	0.98
65	N6-Methyladenosine C11H15N5O4	MS2	M+HCOO	132.034	343.71	0	0		0	0	0	0	0	0	1.64	0	0	1.96	0	2.2	4.72	2.61	1.88	343.3	343.3		343.3	343.3	343.3	343.3	343.3	343.3	342.2	343.3	343.3	343.3	343.3	343.3	343.3	343.3	343.3	0.98	0.97		0.99	0.97	0.99	0.99	0.98
66	Adenosine 2',3'-cyclic monophosphate [M-H]- C10H12N5O6P NIST 1161602---Adenosine 3',5'-cyclic monophosphate [M-H]- C10H12N5O6P NIST 1178318---Adenosine 3',5'-cyclic monophosphate [M-H]- C10H12N5O6P NIST 1178319---Adenosine 3',5'-cyclic monophosphate [M-H]- C10H12N5O6P NIST 1178320	MS1	M-H	328.045	266.05	17.93	17.15	17.06	43.69	46.63	45.8	100.7	93.43	100.8	196.64	200.2	188.03	471.38	454.96	443.79	886.14	922.99	877.3	266.3	265.2	265.2	265.2	265.2	265.2	265.2	266.3	265.2	265.2	265.2	265.2	265.2	265.2	265.2	265.2	265.2	265.2	0.98	0.95	0.94	0.99	0.97	0.99	0.99	0.99
66	Adenosine 2',3'-cyclic monophosphate [M-H]- C10H12N5O6P NIST 1161602---Adenosine 3',5'-cyclic monophosphate [M-H]- C10H12N5O6P NIST 1178318---Adenosine 3',5'-cyclic monophosphate [M-H]- C10H12N5O6P NIST 1178319---Adenosine 3',5'-cyclic monophosphate [M-H]- C10H12N5O6P NIST 1178320	MS2	M-H	134.047	266.05	10.79	8	8.45	23.28	30.36	29.75	59.56	58.99	49.89	138.9	117.85	116.16	235.88	315.31	243.36	499.77	506.41	597.15	266.3	265.2	265.2	265.2	265.2	265.2	265.2	266.3	265.2	265.2	265.2	265.2	265.2	265.2	265.2	265.2	265.2	265.2	0.98	0.95	0.94	0.99	0.97	0.99	0.99	0.99
66	Adenosine 2',3'-cyclic monophosphate [M-H]- C10H12N5O6P NIST 1161602---Adenosine 3',5'-cyclic monophosphate [M-H]- C10H12N5O6P NIST 1178318---Adenosine 3',5'-cyclic monophosphate [M-H]- C10H12N5O6P NIST 1178319---Adenosine 3',5'-cyclic monophosphate [M-H]- C10H12N5O6P NIST 1178320	MS2	M-H	328.046	266.05	6.99	10.19	14.99	21.23	27.46	29.92	53.7	56.5	44.98	128.09	76.38	193.11	400.57	399.5	546.13	531.11	451.45	362.94	266.3	265.2	265.2	265.2	265.2	265.2	265.2	266.3	265.2	265.2	265.2	265.2	265.2	265.2	265.2	265.2	265.2	265.2	0.98	0.95	0.94	0.99	0.97	0.99	0.99	0.99
66	Adenosine 2',3'-cyclic monophosphate [M-H]- C10H12N5O6P NIST 1161602---Adenosine 3',5'-cyclic monophosphate [M-H]- C10H12N5O6P NIST 1178318---Adenosine 3',5'-cyclic monophosphate [M-H]- C10H12N5O6P NIST 1178319---Adenosine 3',5'-cyclic monophosphate [M-H]- C10H12N5O6P NIST 1178320	MS2	M-H	78.9595	266.05	0.77	0.09	1.21	2.26	1.67	2.35	2.85	4.17	4.18	7.37	8.33	5.33	10.84	20.04	14.28	35.56	21.83	30.97	266.3	265.2	265.2	265.2	265.2	265.2	265.2	266.3	265.2	265.2	265.2	265.2	265.2	265.2	265.2	265.2	265.2	265.2	0.98	0.95	0.94	0.99	0.97	0.99	0.99	0.99
66	Adenosine 2',3'-cyclic monophosphate [M-H]- C10H12N5O6P NIST 1161602---Adenosine 3',5'-cyclic monophosphate [M-H]- C10H12N5O6P NIST 1178318---Adenosine 3',5'-cyclic monophosphate [M-H]- C10H12N5O6P NIST 1178319---Adenosine 3',5'-cyclic monophosphate [M-H]- C10H12N5O6P NIST 1178320	MS2	M-H	107.037	266.05	0	0	0.14	0.22	0.22	0.29	0.86	0.22	0.61	1.8	2.06	0.36	2.13	4.03	3.45	8.84	8.49	8.91	266.3	265.2	265.2	265.2	265.2	265.2	265.2	266.3	265.2	265.2	265.2	265.2	265.2	265.2	265.2	265.2	265.2	265.2	0.98	0.95	0.94	0.99	0.97	0.99	0.99	0.99
66	Adenosine 2',3'-cyclic monophosphate [M-H]- C10H12N5O6P NIST 1161602---Adenosine 3',5'-cyclic monophosphate [M-H]- C10H12N5O6P NIST 1178318---Adenosine 3',5'-cyclic monophosphate [M-H]- C10H12N5O6P NIST 1178319---Adenosine 3',5'-cyclic monophosphate [M-H]- C10H12N5O6P NIST 1178320	MS2	M-H	192.991	266.05	0	0.92	1.16	1.06	0.29	0.29	1.16	1.55	1.17	1.83	0.96	4.75	4.69	5.63	3.52	5.27	6.73	5.47	266.3	265.2	265.2	265.2	265.2	265.2	265.2	266.3	265.2	265.2	265.2	265.2	265.2	265.2	265.2	265.2	265.2	265.2	0.98	0.95	0.94	0.99	0.97	0.99	0.99	0.99
66	Adenosine 2',3'-cyclic monophosphate [M-H]- C10H12N5O6P NIST 1161602---Adenosine 3',5'-cyclic monophosphate [M-H]- C10H12N5O6P NIST 1178318---Adenosine 3',5'-cyclic monophosphate [M-H]- C10H12N5O6P NIST 1178319---Adenosine 3',5'-cyclic monophosphate [M-H]- C10H12N5O6P NIST 1178320	MS2	M-H	134.984	266.05	0	0	0	0.24	0.48	0	1.34	0	0.65	1.74	1.78	1.45	2.18	2.84	1.86	5.78	4.7	6.35	266.3	265.2	265.2	265.2	265.2	265.2	265.2	266.3	265.2	265.2	265.2	265.2	265.2	265.2	265.2	265.2	265.2	265.2	0.98	0.95	0.94	0.99	0.97	0.99	0.99	0.99
67	Lactulose C12H22O11	MS1	M-H	341.108	64.45	20.09	22.01	21.79	45.31	47.03	46.62	94.65	94.03	89.38	185.32	182.49	185.28	429.45	425.61	412.88	794.58	790.89	781.98	63.9	63.9	63.9	63.9	63.9	63.9	63.9	63.9	63.9	63.9	63.9	63.9	63.9	63.9	63.9	63.9	63.9	63.9	0.74	0.75	0.9	0.98	0.87	0.95	0.96	0.98
67	Lactulose C12H22O11	MS2	M-H	341.11	64.45	0	2.06	1.15	1.62	0.38	0.77	6.74	5.2	5.03	4.3	5.84	11.25	20.81	24.5	28.24	45.64	34.16	42.45	63.9	63.9	63.9	63.9	63.9	63.9	63.9	63.9	63.9	63.9	63.9	63.9	63.9	63.9	63.9	63.9	63.9	63.9	0.74	0.75	0.9	0.98	0.87	0.95	0.96	0.98
67	Lactulose C12H22O11	MS2	M-H	89.0234	64.45	0.52	0	0.46	0.86	0	1.02	2.59	1.19	2.56	1.12	4.02	5.33	7.02	6.97	8.27	14.52	14.5	12.37	63.9	63.9	63.9	63.9	63.9	63.9	63.9	63.9	63.9	63.9	63.9	63.9	63.9	63.9	63.9	63.9	63.9	63.9	0.74	0.75	0.9	0.98	0.87	0.95	0.96	0.98
67	Lactulose C12H22O11	MS2	M-H	59.0141	64.45	0.75	0.48	0.99	1.47	1.13	1.61	1.9	2.62	4.11	4.1	3.86	3.9	7.83	8.56	6.12	16.94	13.29	13.86	63.9	63.9	63.9	63.9	63.9	63.9	63.9	63.9	63.9	63.9	63.9	63.9	63.9	63.9	63.9	63.9	63.9	63.9	0.74	0.75	0.9	0.98	0.87	0.95	0.96	0.98
67	Lactulose C12H22O11	MS2	M-H	71.0134	64.45	0	0	0	0.7	0.41	0.32	0.94	0.94	1.11	2.41	2.23	1.94	3.02	4.27	3.42	8.85	6.69	6.73	63.9	63.9	63.9	63.9	63.9	63.9	63.9	63.9	63.9	63.9	63.9	63.9	63.9	63.9	63.9	63.9	63.9	63.9	0.74	0.75	0.9	0.98	0.87	0.95	0.96	0.98
67	Lactulose C12H22O11	MS2	M-H	119.035	64.45	0.45	0.08	1.33	1.29	0.23	1.33	2.07	1.37	2.13	2.02	3.8	3.5	7.41	5.5	7.01	12.66	7.49	10.87	63.9	63.9	63.9	63.9	63.9	63.9	63.9	63.9	63.9	63.9	63.9	63.9	63.9	63.9	63.9	63.9	63.9	63.9	0.74	0.75	0.9	0.98	0.87	0.95	0.96	0.98
67	Lactulose C12H22O11	MS2	M-H	113.026	64.45	0.52	0.07	0.22	0.96	0.3	0.33	1.59	1.03	1.71	2.41	2.33	2.07	4.81	6.62	7.85	14.47	9.21	9.26	63.9	63.9	63.9	63.9	63.9	63.9	63.9	63.9	63.9	63.9	63.9	63.9	63.9	63.9	63.9	63.9	63.9	63.9	0.74	0.75	0.9	0.98	0.87	0.95	0.96	0.98
68	5'-Methylthioadenosine C11H15N5O3S	MS1	M+HCOO	342.087	403.24				9.52	11.51	11.6	22.61	20.6	24	40.9	46.88	40.44	110.05	112.25	113.73	229.09	219.47	212.17				402.7	402.7	402.7	403.8	403.8	402.7	402.7	402.7	402.7	402.7	403.8	402.7	402.7	402.7	402.7				0.98	0.98	0.97	0.96	0.98
68	5'-Methylthioadenosine C11H15N5O3S	MS2	M+HCOO	134.047	403.24				10.72	15.37	10.71	26.38	28.65	24.24	54.66	49.37	38.08	167.85	176.32	178.14	251.68	342.78	365.99				402.7	402.7	402.7	403.8	403.8	402.7	402.7	402.7	402.7	402.7	403.8	402.7	402.7	402.7	402.7				0.98	0.98	0.97	0.96	0.98
68	5'-Methylthioadenosine C11H15N5O3S	MS2	M+HCOO	296.082	403.24				0.24	1.2	0.66	1.68	1.99	3.66	4.37	2.51	2.52	12.45	5.57	11.88	20.26	22.17	31.21				402.7	402.7	402.7	403.8	403.8	402.7	402.7	402.7	402.7	402.7	403.8	402.7	402.7	402.7	402.7				0.98	0.98	0.97	0.96	0.98
68	5'-Methylthioadenosine C11H15N5O3S	MS2	M+HCOO	107.037	403.24				0.36	0	0.36	0.14	0.29	0.36	0.36	0.43	0.79	0.79	2.85	1.34	2.2	3.67	3.16				402.7	402.7	402.7	403.8	403.8	402.7	402.7	402.7	402.7	402.7	403.8	402.7	402.7	402.7	402.7				0.98	0.98	0.97	0.96	0.98
68	5'-Methylthioadenosine C11H15N5O3S	MS2	M+HCOO	133.635	403.24				0	0	0	0	0	0	0.48	0.16	0.24	0.48	1.57	1.93	1.32	2.29	2.99				402.7	402.7	402.7	403.8	403.8	402.7	402.7	402.7	402.7	402.7	403.8	402.7	402.7	402.7	402.7				0.98	0.98	0.97	0.96	0.98
68	5'-Methylthioadenosine C11H15N5O3S	MS2	M+HCOO	134.576	403.24				0	0	0	0	0	0	0	0	0	0	0	0	0	0	0				402.7	402.7	402.7	403.8	403.8	402.7	402.7	402.7	402.7	402.7	403.8	402.7	402.7	402.7	402.7				0.98	0.98	0.97	0.96	0.98
68	5'-Methylthioadenosine C11H15N5O3S	MS2	M+HCOO	92.0253	403.24				0	0	0	0	0	0	0	0	0	0	0	0.13	0.67	0	0				402.7	402.7	402.7	403.8	403.8	402.7	402.7	402.7	402.7	402.7	403.8	402.7	402.7	402.7	402.7				0.98	0.98	0.97	0.96	0.98
69	Uridine 5'-monophosphate [2M-H]- C9H13N2O9P NIST 1173763	MS1	M+Na-2H	345.01	58.98							4.47	4.75	6.3	12.13	12.74	12.54	32.55	32.11	32.42	64.62	68.16	65.43							59	58.4	58.4	58.4	58.4	59.5	58.4	58.4	58.4	58.4	58.4	58.4							0.76	0.89
69	Uridine 5'-monophosphate [2M-H]- C9H13N2O9P NIST 1173763	MS2	M+Na-2H	160.958	58.98							0	0.7	0	0.26	0.35	0	2.08	3.32	2.34	2.65	3.93	3.85							59	58.4	58.4	58.4	58.4	59.5	58.4	58.4	58.4	58.4	58.4	58.4							0.76	0.89
69	Uridine 5'-monophosphate [2M-H]- C9H13N2O9P NIST 1173763	MS2	M+Na-2H	78.9581	58.98							3.73	0.87	2.4	2.99	3.08	5.55	7.28	8.71	8.58	14.65	11.82	16.73							59	58.4	58.4	58.4	58.4	59.5	58.4	58.4	58.4	58.4	58.4	58.4							0.76	0.89
69	Uridine 5'-monophosphate [2M-H]- C9H13N2O9P NIST 1173763	MS2	M+Na-2H	302.008	58.98							0.72	0.61	1.09	4.6	1.69	0.48	4.12	2.12	1.4	5.21	3.32	3.87							59	58.4	58.4	58.4	58.4	59.5	58.4	58.4	58.4	58.4	58.4	58.4							0.76	0.89
69	Uridine 5'-monophosphate [2M-H]- C9H13N2O9P NIST 1173763	MS2	M+Na-2H	190.979	58.98							1.82	0	0.58	0	0.72	0.51	0	1.54	0.62	1.87	3.37	0.1							59	58.4	58.4	58.4	58.4	59.5	58.4	58.4	58.4	58.4	58.4	58.4							0.76	0.89
69	Uridine 5'-monophosphate [2M-H]- C9H13N2O9P NIST 1173763	MS2	M+Na-2H	96.9704	58.98							2.78	1.72	2.91	3.84	2.88	4.49	6.05	10.06	8.8	10.9	15.22	13.69							59	58.4	58.4	58.4	58.4	59.5	58.4	58.4	58.4	58.4	58.4	58.4							0.76	0.89
69	Uridine 5'-monophosphate [2M-H]- C9H13N2O9P NIST 1173763	MS2	M+Na-2H	110.024	58.98							0	0.22	0	0	0	0	0.77	1.57	1.09	1.64	2.19	0.88							59	58.4	58.4	58.4	58.4	59.5	58.4	58.4	58.4	58.4	58.4	58.4							0.76	0.89
70	Adenosine 5'-monophosphate C10H14N5O7P	MS1	M-H	346.055	92.63	8.41			21.9	22.73	23.5	52.82	51.19	50.8	106.34	109	113.49	280.79	284.87	279.81	543.87	548.84	530.72	92.6			92.5	92.5	93.6	92.5	93.6	91.4	93.6	92.5	92.5	92.5	92.5	92.5	91.4	91.4	91.4	0.87			0.91	0.93	0.97	0.99	0.98
70	Adenosine 5'-monophosphate C10H14N5O7P	MS2	M-H	346.055	92.63	4.74			11.65	7.31	10.88	18.25	21.39	17.34	41.15	42.19	46.58	86.53	88.22	129.24	180.58	235.65	160	92.6			92.5	92.5	93.6	92.5	93.6	91.4	93.6	92.5	92.5	92.5	92.5	92.5	91.4	91.4	91.4	0.87			0.91	0.93	0.97	0.99	0.98
70	Adenosine 5'-monophosphate C10H14N5O7P	MS2	M-H	78.9591	92.63	1.17			3.09	4.22	5.45	9.4	10.34	8.92	18.03	20.19	14.19	46.59	35.53	42.61	98.19	103.89	102.34	92.6			92.5	92.5	93.6	92.5	93.6	91.4	93.6	92.5	92.5	92.5	92.5	92.5	91.4	91.4	91.4	0.87			0.91	0.93	0.97	0.99	0.98
70	Adenosine 5'-monophosphate C10H14N5O7P	MS2	M-H	134.047	92.63	0			0.88	1.13	2.74	4.64	6.13	4.68	9.37	8.39	11.32	24.15	24.87	20.21	43.87	44	45.86	92.6			92.5	92.5	93.6	92.5	93.6	91.4	93.6	92.5	92.5	92.5	92.5	92.5	91.4	91.4	91.4	0.87			0.91	0.93	0.97	0.99	0.98
70	Adenosine 5'-monophosphate C10H14N5O7P	MS2	M-H	96.9684	92.63	0.58			0	3.05	2.64	4.02	2.04	1.23	7.51	7.82	5.76	18	14.58	14.88	31.88	34.03	31.54	92.6			92.5	92.5	93.6	92.5	93.6	91.4	93.6	92.5	92.5	92.5	92.5	92.5	91.4	91.4	91.4	0.87			0.91	0.93	0.97	0.99	0.98
70	Adenosine 5'-monophosphate C10H14N5O7P	MS2	M-H	211.002	92.63	0			0	0.3	0.5	2.02	2.07	0	2.68	3.74	3.25	5.46	8.04	10.67	18.02	22.59	15.73	92.6			92.5	92.5	93.6	92.5	93.6	91.4	93.6	92.5	92.5	92.5	92.5	92.5	91.4	91.4	91.4	0.87			0.91	0.93	0.97	0.99	0.98
70	Adenosine 5'-monophosphate C10H14N5O7P	MS2	M-H	150.977	92.63	0			0	0	0	2.05	1.19	0	3.29	2.1	3.82	5.01	4.54	6.54	11.87	11.9	8.61	92.6			92.5	92.5	93.6	92.5	93.6	91.4	93.6	92.5	92.5	92.5	92.5	92.5	91.4	91.4	91.4	0.87			0.91	0.93	0.97	0.99	0.98
71	Adenosine 2',3'-cyclic monophosphate [M-H]- C10H12N5O6P NIST 1161599---Adenosine 2',3'-cyclic monophosphate [M-H]- C10H12N5O6P NIST 1161600---Adenosine 2',3'-cyclic monophosphate [M-H]- C10H12N5O6P NIST 1161601	MS1	M+Na-2H	350.026	266.05										5.86		4.86				21.51	23.9	21.7										265.2		265.2				265.2	265.2	265.2
71	Adenosine 2',3'-cyclic monophosphate [M-H]- C10H12N5O6P NIST 1161599---Adenosine 2',3'-cyclic monophosphate [M-H]- C10H12N5O6P NIST 1161600---Adenosine 2',3'-cyclic monophosphate [M-H]- C10H12N5O6P NIST 1161601	MS2	M+Na-2H	134.046	266.05										3.61		8.11				20.42	24.73	22.23										265.2		265.2				265.2	265.2	265.2
71	Adenosine 2',3'-cyclic monophosphate [M-H]- C10H12N5O6P NIST 1161599---Adenosine 2',3'-cyclic monophosphate [M-H]- C10H12N5O6P NIST 1161600---Adenosine 2',3'-cyclic monophosphate [M-H]- C10H12N5O6P NIST 1161601	MS2	M+Na-2H	107.04	266.05										0.11		0.29				0.14	0.43	0.25										265.2		265.2				265.2	265.2	265.2
72	Cortisone C21H28O5 MoNA 436446---Cortisone [M-H]- C21H28O5 NIST 1060530---Cortisone [M-H]- C21H28O5 NIST 1060532	MS1	M-H	359.185	575.94				4.21	3.7	3.38	7.87	8.22	9.21	15.89	17.73	18.07	42.68	40.84	41.74	83.83	86.17	83.37				574.3	576.5	575.4	575.4	575.4	575.4	575.4	575.4	575.4	575.4	576.5	575.4	575.4	575.4	575.4				0.84	0.88	0.87	0.97	0.93
72	Cortisone C21H28O5 MoNA 436446---Cortisone [M-H]- C21H28O5 NIST 1060530---Cortisone [M-H]- C21H28O5 NIST 1060532	MS2	M-H	329.178	575.94				1.83	4.1	1.7	7.95	6.96	6.51	13.13	14.06	14.24	41	51.1	34.97	65.54	77.96	72.89				574.3	576.5	575.4	575.4	575.4	575.4	575.4	575.4	575.4	575.4	576.5	575.4	575.4	575.4	575.4				0.84	0.88	0.87	0.97	0.93
72	Cortisone C21H28O5 MoNA 436446---Cortisone [M-H]- C21H28O5 NIST 1060530---Cortisone [M-H]- C21H28O5 NIST 1060532	MS2	M-H	137.061	575.94				0.65	0.49	0.08	1.51	3.35	2.99	2.86	2.12	2.04	3.88	7.14	5.46	12.57	13.14	13.29				574.3	576.5	575.4	575.4	575.4	575.4	575.4	575.4	575.4	575.4	576.5	575.4	575.4	575.4	575.4				0.84	0.88	0.87	0.97	0.93
72	Cortisone C21H28O5 MoNA 436446---Cortisone [M-H]- C21H28O5 NIST 1060530---Cortisone [M-H]- C21H28O5 NIST 1060532	MS2	M-H	311.165	575.94				0	0	0.37	1.71	1.71	1.72	3.63	2.21	1.65	5.53	5.1	4.97	8.73	12.05	9.77				574.3	576.5	575.4	575.4	575.4	575.4	575.4	575.4	575.4	575.4	576.5	575.4	575.4	575.4	575.4				0.84	0.88	0.87	0.97	0.93
72	Cortisone C21H28O5 MoNA 436446---Cortisone [M-H]- C21H28O5 NIST 1060530---Cortisone [M-H]- C21H28O5 NIST 1060532	MS2	M-H	301.188	575.94				0.48	0	0.84	1.45	1.69	0.6	4.91	2.48	2.66	6.12	8.54	5.01	11.36	12.27	13.37				574.3	576.5	575.4	575.4	575.4	575.4	575.4	575.4	575.4	575.4	576.5	575.4	575.4	575.4	575.4				0.84	0.88	0.87	0.97	0.93
72	Cortisone C21H28O5 MoNA 436446---Cortisone [M-H]- C21H28O5 NIST 1060530---Cortisone [M-H]- C21H28O5 NIST 1060532	MS2	M-H	271.136	575.94				0	0	0	0	0	0.11	0	0.23	0	0.11	0.11	0.34	2.19	1.27	1.26				574.3	576.5	575.4	575.4	575.4	575.4	575.4	575.4	575.4	575.4	576.5	575.4	575.4	575.4	575.4				0.84	0.88	0.87	0.97	0.93
72	Cortisone C21H28O5 MoNA 436446---Cortisone [M-H]- C21H28O5 NIST 1060530---Cortisone [M-H]- C21H28O5 NIST 1060532	MS2	M-H	136.054	575.94				0	0	0	0.16	0	0	0.57	0	0.4	0.97	1.43	1.43	2.51	1.22	1.22				574.3	576.5	575.4	575.4	575.4	575.4	575.4	575.4	575.4	575.4	576.5	575.4	575.4	575.4	575.4				0.84	0.88	0.87	0.97	0.93
73	Cortisol C21H30O5 MoNA 440132	MS1	M-H	361.201	582.95	4.17	4.86	4.53	13.05	9.13	11.01	23.83	23.32	23.44	50.25	54.8	46.04	117.67	113.68	125.74	218.14	224.69	220.68	582	583.1	583.1	583.1	583.1	583.1	583.1	583.1	583.1	583.1	583.1	583.1	583.1	583.1	583.1	583.1	583.1	583.1	0.95	0.98	0.98	0.98	0.98	0.98	0.99	0.98
73	Cortisol C21H30O5 MoNA 440132	MS2	M-H	331.192	582.95	13.33	10.14	11.62	25.38	23.6	16.99	50.26	73.58	61.4	73.7	110.53	111.23	253.59	228.31	225.04	446.21	494.95	486.26	582	583.1	583.1	583.1	583.1	583.1	583.1	583.1	583.1	583.1	583.1	583.1	583.1	583.1	583.1	583.1	583.1	583.1	0.95	0.98	0.98	0.98	0.98	0.98	0.99	0.98
73	Cortisol C21H30O5 MoNA 440132	MS2	M-H	297.15	582.95	5.59	8.47	5.04	17.22	15.36	12.27	29.34	33.88	31.68	42.33	53.99	56.21	137.35	132.24	132.45	251.08	263.25	255.09	582	583.1	583.1	583.1	583.1	583.1	583.1	583.1	583.1	583.1	583.1	583.1	583.1	583.1	583.1	583.1	583.1	583.1	0.95	0.98	0.98	0.98	0.98	0.98	0.99	0.98
73	Cortisol C21H30O5 MoNA 440132	MS2	M-H	282.127	582.95	4.68	4.32	4.21	8.64	10.66	8.51	29.25	21.93	26.24	38.77	47.69	44.32	102.17	106.85	101.34	199.24	205.59	212.61	582	583.1	583.1	583.1	583.1	583.1	583.1	583.1	583.1	583.1	583.1	583.1	583.1	583.1	583.1	583.1	583.1	583.1	0.95	0.98	0.98	0.98	0.98	0.98	0.99	0.98
73	Cortisol C21H30O5 MoNA 440132	MS2	M-H	315.159	582.95	1.8	1.48	0.93	1.23	2.72	1.41	5.99	4.82	4.76	8.91	9.21	12.18	24.72	24.51	24.96	49.41	49.19	57.34	582	583.1	583.1	583.1	583.1	583.1	583.1	583.1	583.1	583.1	583.1	583.1	583.1	583.1	583.1	583.1	583.1	583.1	0.95	0.98	0.98	0.98	0.98	0.98	0.99	0.98
73	Cortisol C21H30O5 MoNA 440132	MS2	M-H	125.06	582.95	0.7	1.48	1.64	3.39	1.21	1.62	5.66	5.08	5.14	9.09	8.16	11.31	21.17	21.47	28.21	46.92	47.4	48.63	582	583.1	583.1	583.1	583.1	583.1	583.1	583.1	583.1	583.1	583.1	583.1	583.1	583.1	583.1	583.1	583.1	583.1	0.95	0.98	0.98	0.98	0.98	0.98	0.99	0.98
73	Cortisol C21H30O5 MoNA 440132	MS2	M-H	189.092	582.95	0.86	0.29	1.05	2.25	2.15	2.12	6.37	4.6	3.84	7.37	9.29	9	20.34	18.94	20.27	36.67	38.65	37.21	582	583.1	583.1	583.1	583.1	583.1	583.1	583.1	583.1	583.1	583.1	583.1	583.1	583.1	583.1	583.1	583.1	583.1	0.95	0.98	0.98	0.98	0.98	0.98	0.99	0.98
73	ISF of Cortisol C21H30O5 MoNA 440132	MS1	-	331.191	583.42	17.9	19.27		46.93	49.97	49.46	103.97	97.25	101.61	186.95	189.74	184.51	442.85	412.31	448.07	773.36	756.84	774.03	583.1	583.1		583.1	583.1	583.1	583.1	583.1	583.1	583.1	583.1	583.1	583.1	583.1	583.1	583.1	583.1	583.1	0.88	0.72		0.89	0.95	0.93	0.93	0.98
73	ISF of Cortisol C21H30O5 MoNA 440132	MS2	-	282.124	583.42	1.76	0.7		3.68	1.35	3.05	6.33	6.08	6.26	9.01	8.12	9.11	30.98	27	23.59	42.59	50.95	42.79	583.1	583.1		583.1	583.1	583.1	583.1	583.1	583.1	583.1	583.1	583.1	583.1	583.1	583.1	583.1	583.1	583.1	0.88	0.72		0.89	0.95	0.93	0.93	0.98
73	ISF of Cortisol C21H30O5 MoNA 440132	MS2	-	297.15	583.42	1.44	0.66		2.94	1.74	3.65	4.33	2.71	5.16	9.61	10.08	5.46	21.79	17.89	19.79	42.68	33.16	41.95	583.1	583.1		583.1	583.1	583.1	583.1	583.1	583.1	583.1	583.1	583.1	583.1	583.1	583.1	583.1	583.1	583.1	0.88	0.72		0.89	0.95	0.93	0.93	0.98
73	ISF of Cortisol C21H30O5 MoNA 440132	MS2	-	331.189	583.42	1.14	0		2.09	1.83	5.89	2.73	5.69	5.71	12.4	11.82	7.92	28.1	19.19	18.27	49.51	45.93	53.74	583.1	583.1		583.1	583.1	583.1	583.1	583.1	583.1	583.1	583.1	583.1	583.1	583.1	583.1	583.1	583.1	583.1	0.88	0.72		0.89	0.95	0.93	0.93	0.98
73	ISF of Cortisol C21H30O5 MoNA 440132	MS2	-	125.06	583.42	0	0		0	0.85	0.47	2.85	1.52	1.28	2.73	3.27	1.91	6.21	5.26	6.47	9.71	9.93	8.07	583.1	583.1		583.1	583.1	583.1	583.1	583.1	583.1	583.1	583.1	583.1	583.1	583.1	583.1	583.1	583.1	583.1	0.88	0.72		0.89	0.95	0.93	0.93	0.98
73	ISF of Cortisol C21H30O5 MoNA 440132	MS2	-	315.164	583.42	0	0		0	0	0	0	0.62	0.62	1.36	0.86	0.49	6.43	2.97	5.19	7.59	5.94	10.36	583.1	583.1		583.1	583.1	583.1	583.1	583.1	583.1	583.1	583.1	583.1	583.1	583.1	583.1	583.1	583.1	583.1	0.88	0.72		0.89	0.95	0.93	0.93	0.98
73	ISF of Cortisol C21H30O5 MoNA 440132	MS2	-	189.089	583.42	0	0.38		0	0.38	0.29	1.43	0	0	1.24	0	0.38	3.5	3.45	2.78	5.03	5.42	8.19	583.1	583.1		583.1	583.1	583.1	583.1	583.1	583.1	583.1	583.1	583.1	583.1	583.1	583.1	583.1	583.1	583.1	0.88	0.72		0.89	0.95	0.93	0.93	0.98
74	Guanosine monophosphate C10H14N5O8P MoNA 439075---Guanosine-5'-monophosphate C10H14N5O8P	MS1	M-H	362.05	65.86							16.08	19	21.63	42.01	43.53	41.7	125.68	117.9	115.72	221.25	207.51	231.59							66.1	68.3	71.6	67.2	67.2	67.2	67.2	67.2	67.2	66.1	66.1	67.2							0.89	0.84
74	Guanosine monophosphate C10H14N5O8P MoNA 439075---Guanosine-5'-monophosphate C10H14N5O8P	MS2	M-H	362.052	65.86							12.32	7.34	8.16	17.64	17.86	13.05	41.13	49.81	46.98	73.13	66.31	82.66							66.1	68.3	71.6	67.2	67.2	67.2	67.2	67.2	67.2	66.1	66.1	67.2							0.89	0.84
74	Guanosine monophosphate C10H14N5O8P MoNA 439075---Guanosine-5'-monophosphate C10H14N5O8P	MS2	M-H	78.9581	65.86							4.68	6.28	15.16	11.71	13.06	11.43	25.31	22.82	26.07	46.25	40.83	54.94							66.1	68.3	71.6	67.2	67.2	67.2	67.2	67.2	67.2	66.1	66.1	67.2							0.89	0.84
74	Guanosine monophosphate C10H14N5O8P MoNA 439075---Guanosine-5'-monophosphate C10H14N5O8P	MS2	M-H	210.995	65.86							0	0	1.11	0	0	1.82	8.59	8.04	10.22	13.3	18.38	13.94							66.1	68.3	71.6	67.2	67.2	67.2	67.2	67.2	67.2	66.1	66.1	67.2							0.89	0.84
74	Guanosine monophosphate C10H14N5O8P MoNA 439075---Guanosine-5'-monophosphate C10H14N5O8P	MS2	M-H	150.037	65.86							0	0	0	1.19	1.02	1.24	3.28	1.11	3.62	6.05	11.4	7.03							66.1	68.3	71.6	67.2	67.2	67.2	67.2	67.2	67.2	66.1	66.1	67.2							0.89	0.84
74	Guanosine monophosphate C10H14N5O8P MoNA 439075---Guanosine-5'-monophosphate C10H14N5O8P	MS2	M-H	96.9712	65.86							2.09	3.16	0	5.18	0	5.48	10.77	13.31	14.95	18.39	22.31	21.12							66.1	68.3	71.6	67.2	67.2	67.2	67.2	67.2	67.2	66.1	66.1	67.2							0.89	0.84
74	Guanosine monophosphate C10H14N5O8P MoNA 439075---Guanosine-5'-monophosphate C10H14N5O8P	MS2	M-H	211.009	65.86							0	0	0	0	0	2.13	9.86	9	8.7	12.47	18.61	16.17							66.1	68.3	71.6	67.2	67.2	67.2	67.2	67.2	67.2	66.1	66.1	67.2							0.89	0.84
75	ISF of Riboflavin C17H20N4O6	MS1	-	255.089	425.79				6.4	6.75	5.48	14.33	12.62	14.63	27.72	28.84	26.89	72.69	68.19	71.46	136.84	138.77	135.94				425.8	425.8	425.8	425.8	425.8	425.8	425.8	425.8	425.8	425.8	425.8	425.8	425.8	425.8	425.8				0.9	0.84	0.85	0.89	0.73
75	ISF of Riboflavin C17H20N4O6	MS2	-	255.085	425.79				2.39	2.56	2.34	4.45	3.72	6.39	12.96	7.34	11.13	37.5	27.03	23.67	62.32	70.76	50.6				425.8	425.8	425.8	425.8	425.8	425.8	425.8	425.8	425.8	425.8	425.8	425.8	425.8	425.8	425.8				0.9	0.84	0.85	0.89	0.73
75	ISF of Riboflavin C17H20N4O6	MS2	-	197.065	425.79				0.19	0.39	0	1.32	0	0	1.47	0.49	2.05	2.79	1.86	2.88	5.25	3.76	5.38				425.8	425.8	425.8	425.8	425.8	425.8	425.8	425.8	425.8	425.8	425.8	425.8	425.8	425.8	425.8				0.9	0.84	0.85	0.89	0.73
75	ISF of Riboflavin C17H20N4O6	MS2	-	198.893	425.79				0.64	0	2.84	1.05	0	1.66	2.55	0	3.92	0.8	2.06	0.96	1.86	2.5	0				425.8	425.8	425.8	425.8	425.8	425.8	425.8	425.8	425.8	425.8	425.8	425.8	425.8	425.8	425.8				0.9	0.84	0.85	0.89	0.73
75	ISF of Riboflavin C17H20N4O6	MS2	-	255.103	425.79				0	0	0	0	0.66	1.11	0	0.45	0	0	0	0	0	0	0				425.8	425.8	425.8	425.8	425.8	425.8	425.8	425.8	425.8	425.8	425.8	425.8	425.8	425.8	425.8				0.9	0.84	0.85	0.89	0.73
75	ISF of Riboflavin C17H20N4O6	MS2	-	200.909	425.79				1.68	1.28	0.59	2.17	0.34	0	2.21	0.98	2.32	0.72	1.13	0.99	2.71	0.74	2.42				425.8	425.8	425.8	425.8	425.8	425.8	425.8	425.8	425.8	425.8	425.8	425.8	425.8	425.8	425.8				0.9	0.84	0.85	0.89	0.73
75	ISF of Riboflavin C17H20N4O6	MS2	-	212.087	425.79				0.3	0	0	0.51	1.01	0	0.1	0.1	0	0.61	0	0.86	2.89	2.99	3.35				425.8	425.8	425.8	425.8	425.8	425.8	425.8	425.8	425.8	425.8	425.8	425.8	425.8	425.8	425.8				0.9	0.84	0.85	0.89	0.73
75	Riboflavin C17H20N4O6	MS1	M-H	375.13	425.79			6.6	14.28	15.84		34.23	34.09	32.04	69.49	66.15	70.12	169.58	158.83	163.7	327.34	332.48	315.51			425.8	425.8	425.8		425.8	425.8	425.8	425.8	425.8	425.8	425.8	425.8	425.8	425.8	425.8	425.8			0.8	0.89	0.84		0.94	0.93
75	Riboflavin C17H20N4O6	MS2	M-H	255.091	425.79			0.78	3.5	1.55		4.45	4.67	4.56	7.62	5.29	9.26	15.85	22.71	23.03	38.62	37.02	39.72			425.8	425.8	425.8		425.8	425.8	425.8	425.8	425.8	425.8	425.8	425.8	425.8	425.8	425.8	425.8			0.8	0.89	0.84		0.94	0.93
75	Riboflavin C17H20N4O6	MS2	M-H	212.083	425.79			0	0.91	0.3		1.01	0.71	0.97	2.28	2.44	2.54	4.97	2.24	4.61	9.34	9.24	9.59			425.8	425.8	425.8		425.8	425.8	425.8	425.8	425.8	425.8	425.8	425.8	425.8	425.8	425.8	425.8			0.8	0.89	0.84		0.94	0.93
75	Riboflavin C17H20N4O6	MS2	M-H	241.072	425.79			0.43	0	0.97		0.54	1.03	2.01	1.19	2	1.78	5.95	7.88	7.79	8.88	11.15	9.68			425.8	425.8	425.8		425.8	425.8	425.8	425.8	425.8	425.8	425.8	425.8	425.8	425.8	425.8	425.8			0.8	0.89	0.84		0.94	0.93
75	Riboflavin C17H20N4O6	MS2	M-H	375.133	425.79			0	0	0		0.67	0	0	0	0.13	1.55	0	3.99	0.95	4.38	5.27	2.43			425.8	425.8	425.8		425.8	425.8	425.8	425.8	425.8	425.8	425.8	425.8	425.8	425.8	425.8	425.8			0.8	0.89	0.84		0.94	0.93
75	Riboflavin C17H20N4O6	MS2	M-H	240.07	425.79			0	0	0		0	0	0	0	0	0	1.08	0.54	0	0.22	0.87	1.35			425.8	425.8	425.8		425.8	425.8	425.8	425.8	425.8	425.8	425.8	425.8	425.8	425.8	425.8	425.8			0.8	0.89	0.84		0.94	0.93
75	Riboflavin C17H20N4O6	MS2	M-H	184.086	425.79			0	0	0		0	0	0	0	0	0	0	0.38	0	0.38	0.28	0.28			425.8	425.8	425.8		425.8	425.8	425.8	425.8	425.8	425.8	425.8	425.8	425.8	425.8	425.8	425.8			0.8	0.89	0.84		0.94	0.93
76	D-(+)-Trehalose; LC-ESI-QTOF; MS2; CE C12H22O11---Unknown (carbon number 12); PlaSMA ID-789 C12H22O11	MS1	M+Cl	377.085	64.45	0.52	1.03	0.72	1.56	2.33	1.44	6.1	5.28	5.85	18.77	20.84	19.02	54.58	54.41	50.13	93.81	90.99	90.79	64.5	64.5	64.5	64.5	64.5	64.5	63.9	63.9	62.8	63.9	63.9	63.9	63.9	63.9	63.9	63.9	63.9	63.9	0.83	0.81	0.83	0.82	0.91	0.9	0.88	0.83
76	D-(+)-Trehalose; LC-ESI-QTOF; MS2; CE C12H22O11---Unknown (carbon number 12); PlaSMA ID-789 C12H22O11	MS2	M+Cl	341.108	64.45	13.48	12.99	15.52	25.09	33.59	36.36	57.74	60.89	54.9	68.69	83.91	149.77	273.18	313.41	205.38	480.82	714.68	677.1	64.5	64.5	64.5	64.5	64.5	64.5	63.9	63.9	62.8	63.9	63.9	63.9	63.9	63.9	63.9	63.9	63.9	63.9	0.83	0.81	0.83	0.82	0.91	0.9	0.88	0.83
76	D-(+)-Trehalose; LC-ESI-QTOF; MS2; CE C12H22O11---Unknown (carbon number 12); PlaSMA ID-789 C12H22O11	MS2	M+Cl	377.08	64.45	0	0	0	0	0.54	0.4	0.75	0	0	0	1.75	3.11	1.75	6.55	4.34	14.28	13.05	14.67	64.5	64.5	64.5	64.5	64.5	64.5	63.9	63.9	62.8	63.9	63.9	63.9	63.9	63.9	63.9	63.9	63.9	63.9	0.83	0.81	0.83	0.82	0.91	0.9	0.88	0.83
76	D-(+)-Trehalose; LC-ESI-QTOF; MS2; CE C12H22O11---Unknown (carbon number 12); PlaSMA ID-789 C12H22O11	MS2	M+Cl	179.056	64.45	3.67	4.66	1.67	4.38	7.96	6.2	6.73	8.59	10.77	13.1	17.69	17.12	50.53	45.18	36.42	77.81	65.3	113.35	64.5	64.5	64.5	64.5	64.5	64.5	63.9	63.9	62.8	63.9	63.9	63.9	63.9	63.9	63.9	63.9	63.9	63.9	0.83	0.81	0.83	0.82	0.91	0.9	0.88	0.83
76	D-(+)-Trehalose; LC-ESI-QTOF; MS2; CE C12H22O11---Unknown (carbon number 12); PlaSMA ID-789 C12H22O11	MS2	M+Cl	119.037	64.45	1.67	1.86	2.58	2.92	4.9	4.37	4.53	7.6	10.12	14.69	13.54	13.78	45.05	35.37	30.2	83.12	54.22	75.98	64.5	64.5	64.5	64.5	64.5	64.5	63.9	63.9	62.8	63.9	63.9	63.9	63.9	63.9	63.9	63.9	63.9	63.9	0.83	0.81	0.83	0.82	0.91	0.9	0.88	0.83
76	D-(+)-Trehalose; LC-ESI-QTOF; MS2; CE C12H22O11---Unknown (carbon number 12); PlaSMA ID-789 C12H22O11	MS2	M+Cl	113.021	64.45	1.81	1.44	0.52	2.21	2.55	1.85	3.26	4.46	4.66	5.26	4.99	5.96	19.65	17.47	16.02	29.52	28.65	30.98	64.5	64.5	64.5	64.5	64.5	64.5	63.9	63.9	62.8	63.9	63.9	63.9	63.9	63.9	63.9	63.9	63.9	63.9	0.83	0.81	0.83	0.82	0.91	0.9	0.88	0.83
76	D-(+)-Trehalose; LC-ESI-QTOF; MS2; CE C12H22O11---Unknown (carbon number 12); PlaSMA ID-789 C12H22O11	MS2	M+Cl	89.0246	64.45	2.17	2.86	2.27	3.19	5.09	4.36	3.09	6.65	11.07	12.01	12.86	10.26	45.72	31.52	24.13	80.72	51.7	65.43	64.5	64.5	64.5	64.5	64.5	64.5	63.9	63.9	62.8	63.9	63.9	63.9	63.9	63.9	63.9	63.9	63.9	63.9	0.83	0.81	0.83	0.82	0.91	0.9	0.88	0.83
77	S-Adenosyl-homocysteine C14H20N6O5S---S-Adenosylhomocysteine C14H20N6O5S MassBank 6264	MS1	M-H	383.114	238.49	12.23	12.84	11.49	29.35	29.43	29.36	65.62	65.33	64.17	122.97	120.94	124.25	310.69	317.27	324.49	601.12	593.23	589.59	238.8	238.8	238.8	238.8	238.8	238.8	238.8	238.8	237.7	238.8	238.8	238.8	238.8	238.8	238.8	238.8	238.8	238.8	0.93	0.97	0.88	0.97	0.98	0.88	0.96	0.94
77	S-Adenosyl-homocysteine C14H20N6O5S---S-Adenosylhomocysteine C14H20N6O5S MassBank 6264	MS2	M-H	134.047	238.49	9.54	8.72	5.97	22.32	25.62	14.37	54.86	40.51	57.08	116.18	145.56	108.01	389.35	268.98	324.75	535.14	445.16	487.42	238.8	238.8	238.8	238.8	238.8	238.8	238.8	238.8	237.7	238.8	238.8	238.8	238.8	238.8	238.8	238.8	238.8	238.8	0.93	0.97	0.88	0.97	0.98	0.88	0.96	0.94
77	S-Adenosyl-homocysteine C14H20N6O5S---S-Adenosylhomocysteine C14H20N6O5S MassBank 6264	MS2	M-H	383.115	238.49	4.77	2.87	3.95	12.5	6.4	11.38	19.66	20.44	17	32.39	48.77	26.91	83.48	89.3	120.98	357.9	238.74	176.31	238.8	238.8	238.8	238.8	238.8	238.8	238.8	238.8	237.7	238.8	238.8	238.8	238.8	238.8	238.8	238.8	238.8	238.8	0.93	0.97	0.88	0.97	0.98	0.88	0.96	0.94
77	S-Adenosyl-homocysteine C14H20N6O5S---S-Adenosylhomocysteine C14H20N6O5S MassBank 6264	MS2	M-H	188.039	238.49	0	0	0	0.67	0.81	0.1	0.43	1.77	1.05	3.3	3.63	2.91	7.97	5.98	6.98	17.95	8.26	16.42	238.8	238.8	238.8	238.8	238.8	238.8	238.8	238.8	237.7	238.8	238.8	238.8	238.8	238.8	238.8	238.8	238.8	238.8	0.93	0.97	0.88	0.97	0.98	0.88	0.96	0.94
77	S-Adenosyl-homocysteine C14H20N6O5S---S-Adenosylhomocysteine C14H20N6O5S MassBank 6264	MS2	M-H	248.059	238.49	0	0.33	0.55	0.66	0.66	0.33	0.88	1.87	1.31	2.19	3.29	4.16	3.95	5.1	7.57	15.43	10.15	14.38	238.8	238.8	238.8	238.8	238.8	238.8	238.8	238.8	237.7	238.8	238.8	238.8	238.8	238.8	238.8	238.8	238.8	238.8	0.93	0.97	0.88	0.97	0.98	0.88	0.96	0.94
77	S-Adenosyl-homocysteine C14H20N6O5S---S-Adenosylhomocysteine C14H20N6O5S MassBank 6264	MS2	M-H	107.037	238.49	0	0	0.36	0	0	0	0.07	0	0.22	1.19	0.43	0.83	1.51	1.19	1.37	3.96	2.53	2.02	238.8	238.8	238.8	238.8	238.8	238.8	238.8	238.8	237.7	238.8	238.8	238.8	238.8	238.8	238.8	238.8	238.8	238.8	0.93	0.97	0.88	0.97	0.98	0.88	0.96	0.94
77	S-Adenosyl-homocysteine C14H20N6O5S---S-Adenosylhomocysteine C14H20N6O5S MassBank 6264	MS2	M-H	176.04	238.49	0	0	0	0.56	0.09	0	0.46	1.48	1.29	2.63	1.94	1.71	3.74	3.56	4.95	8.98	5.68	7.96	238.8	238.8	238.8	238.8	238.8	238.8	238.8	238.8	237.7	238.8	238.8	238.8	238.8	238.8	238.8	238.8	238.8	238.8	0.93	0.97	0.88	0.97	0.98	0.88	0.96	0.94
78	FAHFA 23:0; FAHFA 14:0/9:0; [M-H]- C23H44O4	MS1	M-H	383.315	855.54	10.46	17.56		10.71		10.62		9.83			12.3	10.89	8.21			10.9		10.74	855.5	854.8		855.5		855.5		855.5			855.5	855.5	857			855.5		855.5	0.79	0.94		0.86		0.95		0.95
78	FAHFA 23:0; FAHFA 14:0/9:0; [M-H]- C23H44O4	MS2	M-H	227.202	855.54	2.68	3.83		2.1		4.4		1.1			3.25	3.94	2.25			2.51		1.68	855.5	854.8		855.5		855.5		855.5			855.5	855.5	857			855.5		855.5	0.79	0.94		0.86		0.95		0.95
78	FAHFA 23:0; FAHFA 14:0/9:0; [M-H]- C23H44O4	MS2	M-H	383.183	855.54	0	13.61		4.36		5.58		1.16			3.2	4.56	1.63			5.44		1.56	855.5	854.8		855.5		855.5		855.5			855.5	855.5	857			855.5		855.5	0.79	0.94		0.86		0.95		0.95
78	FAHFA 23:0; FAHFA 14:0/9:0; [M-H]- C23H44O4	MS2	M-H	383.354	855.54	6.73	9.26		5.24		10.01		5.86			11.13	7.52	9.27			7.71		8.04	855.5	854.8		855.5		855.5		855.5			855.5	855.5	857			855.5		855.5	0.79	0.94		0.86		0.95		0.95
78	FAHFA 23:0; FAHFA 14:0/9:0; [M-H]- C23H44O4	MS2	M-H	173.117	855.54	3.12	2.92		3.47		1.88		1.55			3.02	1.47	0			4.18		3.47	855.5	854.8		855.5		855.5		855.5			855.5	855.5	857			855.5		855.5	0.79	0.94		0.86		0.95		0.95
78	FAHFA 23:0; FAHFA 14:0/9:0; [M-H]- C23H44O4	MS2	M-H	355.177	855.54	6.81	6.68		6.71		11.14		3.48			4.99	7.21	5.22			3.47		0	855.5	854.8		855.5		855.5		855.5			855.5	855.5	857			855.5		855.5	0.79	0.94		0.86		0.95		0.95
78	FAHFA 23:0; FAHFA 14:0/9:0; [M-H]- C23H44O4	MS2	M-H	337.35	855.54	0	1.66		0		0.89		2.62			0	0	1.21			1.91		0	855.5	854.8		855.5		855.5		855.5			855.5	855.5	857			855.5		855.5	0.79	0.94		0.86		0.95		0.95
79	D-(+)-Trehalose; LC-ESI-QTOF; MS2; CE C12H22O11	MS1	M+HCOO	387.113	64.45	11.01	9.05	11.97	25.8	26.35	25.62	57.2	50.62	55.42	98.18	106.43	102.42	248.55	248.64	242.54	492.57	476.16	483.62	63.9	63.9	63.9	63.9	63.9	63.9	63.9	63.9	63.9	63.9	63.9	63.9	63.9	63.9	63.9	63.9	63.9	63.9	0.99	0.99	0.99	0.99	0.99	1	0.96	0.99
79	D-(+)-Trehalose; LC-ESI-QTOF; MS2; CE C12H22O11	MS2	M+HCOO	341.108	64.45	9.43	10.9	12.3	21.46	31.79	32.34	74.31	60.89	57.92	70.88	86.83	152.56	278.32	330.13	217	498.17	722.15	701.89	63.9	63.9	63.9	63.9	63.9	63.9	63.9	63.9	63.9	63.9	63.9	63.9	63.9	63.9	63.9	63.9	63.9	63.9	0.99	0.99	0.99	0.99	0.99	1	0.96	0.99
79	D-(+)-Trehalose; LC-ESI-QTOF; MS2; CE C12H22O11	MS2	M+HCOO	179.056	64.45	2.28	3.36	1.67	3.36	7.82	6.15	8.06	8.59	11	13.33	18.48	17.67	52.05	46.41	39.1	81.98	67.34	117.54	63.9	63.9	63.9	63.9	63.9	63.9	63.9	63.9	63.9	63.9	63.9	63.9	63.9	63.9	63.9	63.9	63.9	63.9	0.99	0.99	0.99	0.99	0.99	1	0.96	0.99
79	D-(+)-Trehalose; LC-ESI-QTOF; MS2; CE C12H22O11	MS2	M+HCOO	89.0244	64.45	1.74	2.6	1.81	2.63	3.9	3.96	3.78	6.65	11.53	12.37	13.3	10.49	46.27	32.38	25.3	82.3	53.11	67.11	63.9	63.9	63.9	63.9	63.9	63.9	63.9	63.9	63.9	63.9	63.9	63.9	63.9	63.9	63.9	63.9	63.9	63.9	0.99	0.99	0.99	0.99	0.99	1	0.96	0.99
79	D-(+)-Trehalose; LC-ESI-QTOF; MS2; CE C12H22O11	MS2	M+HCOO	119.035	64.45	1.6	1.64	2.58	2.66	4.41	4.37	6.05	7.6	10.12	15.03	13.96	13.89	45.87	35.9	31.89	84.57	55.93	78.77	63.9	63.9	63.9	63.9	63.9	63.9	63.9	63.9	63.9	63.9	63.9	63.9	63.9	63.9	63.9	63.9	63.9	63.9	0.99	0.99	0.99	0.99	0.99	1	0.96	0.99
79	D-(+)-Trehalose; LC-ESI-QTOF; MS2; CE C12H22O11	MS2	M+HCOO	59.0136	64.45	0.96	1.42	0.62	1.77	3.43	1.93	1.96	2.64	5.5	4.07	6.01	4.52	17.08	12.29	9.15	26.06	22.38	30.41	63.9	63.9	63.9	63.9	63.9	63.9	63.9	63.9	63.9	63.9	63.9	63.9	63.9	63.9	63.9	63.9	63.9	63.9	0.99	0.99	0.99	0.99	0.99	1	0.96	0.99
79	D-(+)-Trehalose; LC-ESI-QTOF; MS2; CE C12H22O11	MS2	M+HCOO	113.024	64.45	1.81	1.44	0.52	1.73	2.11	1.85	4.26	4.46	4.74	5.33	5.11	6.56	20.04	18.21	16.59	30.64	29.88	31.85	63.9	63.9	63.9	63.9	63.9	63.9	63.9	63.9	63.9	63.9	63.9	63.9	63.9	63.9	63.9	63.9	63.9	63.9	0.99	0.99	0.99	0.99	0.99	1	0.96	0.99
80	LAUROYLCARNITINE C19H37NO4	MS1	M+HCOO	388.27	705.72		0.78		5.25	5.04	5.15	10.98	11.16	6.71	20.33	20.68	19.44	53.48	52.69	53.74	109.5	113.72	116.59		705.7		707.4	706.3	705.2	706.3	706.3	706.3	706.3	706.3	706.3	706.3	706.3	706.3	706.3	706.3	706.3		0.95		0.99	0.96	0.98	0.95	0.99
80	LAUROYLCARNITINE C19H37NO4	MS2	M+HCOO	199.17	705.72		5.85		15.57	16.96	16.84	31.41	33.03	28.45	77.96	68.06	63.16	205.24	191.32	184.9	469.15	418.35	404.38		705.7		707.4	706.3	705.2	706.3	706.3	706.3	706.3	706.3	706.3	706.3	706.3	706.3	706.3	706.3	706.3		0.95		0.99	0.96	0.98	0.95	0.99
80	LAUROYLCARNITINE C19H37NO4	MS2	M+HCOO	144.105	705.72		0.67		0.67	1.17	0.96	2.67	1.09	1.84	6.79	4.11	4.31	13.66	14.75	13.93	21.28	28.53	27.1		705.7		707.4	706.3	705.2	706.3	706.3	706.3	706.3	706.3	706.3	706.3	706.3	706.3	706.3	706.3	706.3		0.95		0.99	0.96	0.98	0.95	0.99
80	LAUROYLCARNITINE C19H37NO4	MS2	M+HCOO	181.164	705.72		0		0	0	0	0	0	0	0	0	0	0	0	0	0	0	0		705.7		707.4	706.3	705.2	706.3	706.3	706.3	706.3	706.3	706.3	706.3	706.3	706.3	706.3	706.3	706.3		0.95		0.99	0.96	0.98	0.95	0.99
80	LAUROYLCARNITINE C19H37NO4	MS2	M+HCOO	199.337	705.72		0		0	0	0	0	0	0	0	0	0	0	0	0	0	0	0		705.7		707.4	706.3	705.2	706.3	706.3	706.3	706.3	706.3	706.3	706.3	706.3	706.3	706.3	706.3	706.3		0.95		0.99	0.96	0.98	0.95	0.99
80	LAUROYLCARNITINE C19H37NO4	MS2	M+HCOO	198.552	705.72		0		0	0.39	0	0.29	0	0	0	0	0.1	1.86	1.08	0.78	2.6	1.72	1.62		705.7		707.4	706.3	705.2	706.3	706.3	706.3	706.3	706.3	706.3	706.3	706.3	706.3	706.3	706.3	706.3		0.95		0.99	0.96	0.98	0.95	0.99
80	LAUROYLCARNITINE C19H37NO4	MS2	M+HCOO	146.082	705.72		0		0	0	0	0	0	0	0	0	0	0.34	0	0	0	0.84	0.76		705.7		707.4	706.3	705.2	706.3	706.3	706.3	706.3	706.3	706.3	706.3	706.3	706.3	706.3	706.3	706.3		0.95		0.99	0.96	0.98	0.95	0.99
81	(-)-11-Nor-9-carboxy-.DELTA.9-THC [M+H]+ C21H28O4 NIST 1206889	MS1	M+HCOO	389.196	623.82	0.09		0.46	1.75	3.24	2.84	5.49	6.22	4.74	10.08	9	11.96	26.52	24.42	24.95	45.15	45.92	46.67	623.8		623.8	623.8	623.8	623.8	623.8	623.8	623.8	623.8	623.8	623.8	623.8	623.8	623.8	623.8	623.8	623.8	0.92		0.92	0.93	0.95	0.95	0.97	1
81	(-)-11-Nor-9-carboxy-.DELTA.9-THC [M+H]+ C21H28O4 NIST 1206889	MS2	M+HCOO	345.211	623.82	0.58		1.08	5.49	5.34	5.56	13.41	11.63	9.91	18.02	15.8	21.4	56.77	51.14	57.29	89.77	83.29	84.3	623.8		623.8	623.8	623.8	623.8	623.8	623.8	623.8	623.8	623.8	623.8	623.8	623.8	623.8	623.8	623.8	623.8	0.92		0.92	0.93	0.95	0.95	0.97	1
81	(-)-11-Nor-9-carboxy-.DELTA.9-THC [M+H]+ C21H28O4 NIST 1206889	MS2	M+HCOO	241.161	623.82	0.81		1.08	2.81	4.22	2.92	6.75	5.9	7.36	11.03	10.31	10.33	32.41	35.17	31.11	62.4	57.02	57.91	623.8		623.8	623.8	623.8	623.8	623.8	623.8	623.8	623.8	623.8	623.8	623.8	623.8	623.8	623.8	623.8	623.8	0.92		0.92	0.93	0.95	0.95	0.97	1
81	(-)-11-Nor-9-carboxy-.DELTA.9-THC [M+H]+ C21H28O4 NIST 1206889	MS2	M+HCOO	327.199	623.82	1		0.25	0.38	2.34	2.46	4.6	6.05	4.48	12.78	9.73	12.48	22.72	22.09	25.29	45.02	42.05	49.68	623.8		623.8	623.8	623.8	623.8	623.8	623.8	623.8	623.8	623.8	623.8	623.8	623.8	623.8	623.8	623.8	623.8	0.92		0.92	0.93	0.95	0.95	0.97	1
81	(-)-11-Nor-9-carboxy-.DELTA.9-THC [M+H]+ C21H28O4 NIST 1206889	MS2	M+HCOO	123.082	623.82	0		0.31	0	0	0	1.31	0.85	0.85	1.47	2.39	1.74	4.36	5.36	3.45	8.01	5.87	6.76	623.8		623.8	623.8	623.8	623.8	623.8	623.8	623.8	623.8	623.8	623.8	623.8	623.8	623.8	623.8	623.8	623.8	0.92		0.92	0.93	0.95	0.95	0.97	1
81	(-)-11-Nor-9-carboxy-.DELTA.9-THC [M+H]+ C21H28O4 NIST 1206889	MS2	M+HCOO	189.097	623.82	0		0	0.29	0	0.19	0.38	0.48	0.48	0.86	2.39	1.63	2.83	5.95	2.54	4.7	7.33	5.85	623.8		623.8	623.8	623.8	623.8	623.8	623.8	623.8	623.8	623.8	623.8	623.8	623.8	623.8	623.8	623.8	623.8	0.92		0.92	0.93	0.95	0.95	0.97	1
81	(-)-11-Nor-9-carboxy-.DELTA.9-THC [M+H]+ C21H28O4 NIST 1206889	MS2	M+HCOO	309.191	623.82	0		0	0	0.49	0	0	0.12	0.49	0.61	0.98	0.12	1.65	2.45	3.3	3.13	4.73	2.81	623.8		623.8	623.8	623.8	623.8	623.8	623.8	623.8	623.8	623.8	623.8	623.8	623.8	623.8	623.8	623.8	623.8	0.92		0.92	0.93	0.95	0.95	0.97	1
82	13,14-Dehydro-15-cyclohexyl Carbaprostacyclin [M-H]- C21H30O4 NIST 1132531	MS1	M+HCOO	391.212	623.82	66.63	64.28	61.5	161.27	169.55	171.33	324.11	319.09	316.58	640.17	638.1	638.27	1511.54	1518.81	1558.81	2999.88	2988.71	3134.4	623.8	623.8	623.8	623.8	623.8	623.8	623.8	623.8	623.8	623.8	623.8	623.8	623.8	623.8	623.8	623.8	623.8	623.8	0.92	0.88	0.94	0.94	0.94	0.95	0.96	0.93
82	13,14-Dehydro-15-cyclohexyl Carbaprostacyclin [M-H]- C21H30O4 NIST 1132531	MS2	M+HCOO	391.214	623.82	3.16	3.78	3.99	10.04	7.99	9.55	23.6	18.74	18.29	32.51	27.14	33.71	80.76	88.23	74.93	163.66	181	170.2	623.8	623.8	623.8	623.8	623.8	623.8	623.8	623.8	623.8	623.8	623.8	623.8	623.8	623.8	623.8	623.8	623.8	623.8	0.92	0.88	0.94	0.94	0.94	0.95	0.96	0.93
82	13,14-Dehydro-15-cyclohexyl Carbaprostacyclin [M-H]- C21H30O4 NIST 1132531	MS2	M+HCOO	345.206	623.82	0.58	3.3	0.31	5.49	5.69	5.56	13.41	11.89	9.91	18.02	19.19	21.4	56.64	51.33	57.29	89.77	83.29	84.37	623.8	623.8	623.8	623.8	623.8	623.8	623.8	623.8	623.8	623.8	623.8	623.8	623.8	623.8	623.8	623.8	623.8	623.8	0.92	0.88	0.94	0.94	0.94	0.95	0.96	0.93
82	13,14-Dehydro-15-cyclohexyl Carbaprostacyclin [M-H]- C21H30O4 NIST 1132531	MS2	M+HCOO	327.194	623.82	0	0	0.25	0.38	2.9	0.82	4.6	6.05	4.48	12.78	11.53	11.86	22.72	22.09	25.79	45.84	42.05	49.68	623.8	623.8	623.8	623.8	623.8	623.8	623.8	623.8	623.8	623.8	623.8	623.8	623.8	623.8	623.8	623.8	623.8	623.8	0.92	0.88	0.94	0.94	0.94	0.95	0.96	0.93
82	13,14-Dehydro-15-cyclohexyl Carbaprostacyclin [M-H]- C21H30O4 NIST 1132531	MS2	M+HCOO	241.164	623.82	0.32	0.86	1.08	2.81	4.49	2.92	6.75	5.9	7.36	11.03	13.37	10.33	32.41	35.17	31.11	62.4	57.02	57.91	623.8	623.8	623.8	623.8	623.8	623.8	623.8	623.8	623.8	623.8	623.8	623.8	623.8	623.8	623.8	623.8	623.8	623.8	0.92	0.88	0.94	0.94	0.94	0.95	0.96	0.93
82	13,14-Dehydro-15-cyclohexyl Carbaprostacyclin [M-H]- C21H30O4 NIST 1132531	MS2	M+HCOO	347.216	623.82	0	0	0	0	0	0	0.52	0	0	0	1.68	1.55	1.16	1.37	1.94	2.91	0	2.46	623.8	623.8	623.8	623.8	623.8	623.8	623.8	623.8	623.8	623.8	623.8	623.8	623.8	623.8	623.8	623.8	623.8	623.8	0.92	0.88	0.94	0.94	0.94	0.95	0.96	0.93
82	13,14-Dehydro-15-cyclohexyl Carbaprostacyclin [M-H]- C21H30O4 NIST 1132531	MS2	M+HCOO	243.166	623.82	0	0	0	0	0	0	0	0	0	0	0	0	1.41	0	0.22	0.22	1.03	0.6	623.8	623.8	623.8	623.8	623.8	623.8	623.8	623.8	623.8	623.8	623.8	623.8	623.8	623.8	623.8	623.8	623.8	623.8	0.92	0.88	0.94	0.94	0.94	0.95	0.96	0.93
83	Cortisone C21H28O5 MoNA 436445---Cortisone C21H28O5 MoNA 436446---Cortisone [M-H]- C21H28O5 NIST 1060528	MS1	M+Cl	395.162	575.94	2.8		2.23		5.85		14.95	13.26	14.08	26.7	27.94	28.73	72.82	64.41	69.82	144.67	153.8	136.62	575.4		575.9		575.4		575.4	575.4	575.4	575.4	575.4	575.4	575.4	575.4	575.4	575.4	575.4	575.4	0.57		0.57		0.53		0.86	0.85
83	Cortisone C21H28O5 MoNA 436445---Cortisone C21H28O5 MoNA 436446---Cortisone [M-H]- C21H28O5 NIST 1060528	MS2	M+Cl	395.161	575.94	0		0		0.28		1.59	0.69	2.49	5.41	3.12	3.88	7.68	5.95	12.5	17.07	10.94	23.44	575.4		575.9		575.4		575.4	575.4	575.4	575.4	575.4	575.4	575.4	575.4	575.4	575.4	575.4	575.4	0.57		0.57		0.53		0.86	0.85
83	Cortisone C21H28O5 MoNA 436445---Cortisone C21H28O5 MoNA 436446---Cortisone [M-H]- C21H28O5 NIST 1060528	MS2	M+Cl	329.173	575.94	1.13		0.5		0		0.63	0.76	0	2.65	2.46	1.46	6.83	3.98	6.39	8.4	8.75	8.08	575.4		575.9		575.4		575.4	575.4	575.4	575.4	575.4	575.4	575.4	575.4	575.4	575.4	575.4	575.4	0.57		0.57		0.53		0.86	0.85
83	Cortisone C21H28O5 MoNA 436445---Cortisone C21H28O5 MoNA 436446---Cortisone [M-H]- C21H28O5 NIST 1060528	MS2	M+Cl	301.184	575.94	0		0		0		0	0.24	0	0.48	0	0	0.73	0.12	0.36	3.08	0.9	0	575.4		575.9		575.4		575.4	575.4	575.4	575.4	575.4	575.4	575.4	575.4	575.4	575.4	575.4	575.4	0.57		0.57		0.53		0.86	0.85
83	Cortisone C21H28O5 MoNA 436445---Cortisone C21H28O5 MoNA 436446---Cortisone [M-H]- C21H28O5 NIST 1060528	MS2	M+Cl	258.925	575.94	1.29		3.52		1.62		0.5	1.23	0.45	1.35	0	0	0.34	2.12	0.89	0	0	0	575.4		575.9		575.4		575.4	575.4	575.4	575.4	575.4	575.4	575.4	575.4	575.4	575.4	575.4	575.4	0.57		0.57		0.53		0.86	0.85
83	Cortisone C21H28O5 MoNA 436445---Cortisone C21H28O5 MoNA 436446---Cortisone [M-H]- C21H28O5 NIST 1060528	MS2	M+Cl	311.166	575.94	0		0		0		0	0	0	0	0	0	0.24	0	0	0.37	0	0	575.4		575.9		575.4		575.4	575.4	575.4	575.4	575.4	575.4	575.4	575.4	575.4	575.4	575.4	575.4	0.57		0.57		0.53		0.86	0.85
83	Cortisone C21H28O5 MoNA 436445---Cortisone C21H28O5 MoNA 436446---Cortisone [M-H]- C21H28O5 NIST 1060528	MS2	M+Cl	258.881	575.94	0.39		5.96		0		1.79	1.63	1.87	1.84	2.71	1.85	2.13	1.42	4.19	2.01	0	0	575.4		575.9		575.4		575.4	575.4	575.4	575.4	575.4	575.4	575.4	575.4	575.4	575.4	575.4	575.4	0.57		0.57		0.53		0.86	0.85
84	17,20,21-Trihydroxypregn-1-ene-3,11-dione [M-H]- C21H30O5 NIST 1111692---Cortisol C21H30O5 MoNA 440132	MS1	M+Cl	397.178	582.95	33.58	32.88	29.98		79.57	71.93	152.62	140.81		294.1	315.22	275.28	700.07	717.3	690.63	1306.7	1369.26	1358.56	583.1	583.1	583.1		583.1	583.1	583.1	583.1		583.1	583.1	583.1	583.1	583.1	583.1	583.1	583.1	583.1	0.84	0.98	0.94		0.97	0.95	0.96	0.95
84	17,20,21-Trihydroxypregn-1-ene-3,11-dione [M-H]- C21H30O5 NIST 1111692---Cortisol C21H30O5 MoNA 440132	MS2	M+Cl	397.179	582.95	2.01	4.99	3.13		15.23	10.49	29.89	22.84		46.85	60	55.77	101.23	129.04	130.47	257.71	295.76	250.31	583.1	583.1	583.1		583.1	583.1	583.1	583.1		583.1	583.1	583.1	583.1	583.1	583.1	583.1	583.1	583.1	0.84	0.98	0.94		0.97	0.95	0.96	0.95
84	17,20,21-Trihydroxypregn-1-ene-3,11-dione [M-H]- C21H30O5 NIST 1111692---Cortisol C21H30O5 MoNA 440132	MS2	M+Cl	331.189	582.95	0	0.13	0.13		0.63	1.08	0	1.65		0.76	5.39	5.14	6.77	8.06	9	16.14	13.09	17.89	583.1	583.1	583.1		583.1	583.1	583.1	583.1		583.1	583.1	583.1	583.1	583.1	583.1	583.1	583.1	583.1	0.84	0.98	0.94		0.97	0.95	0.96	0.95
84	17,20,21-Trihydroxypregn-1-ene-3,11-dione [M-H]- C21H30O5 NIST 1111692---Cortisol C21H30O5 MoNA 440132	MS2	M+Cl	297.144	582.95	0	0	0		0	0	0.48	0.78		1.38	2.4	0	3.48	2.1	3.72	3.91	4.02	2.76	583.1	583.1	583.1		583.1	583.1	583.1	583.1		583.1	583.1	583.1	583.1	583.1	583.1	583.1	583.1	583.1	0.84	0.98	0.94		0.97	0.95	0.96	0.95
84	17,20,21-Trihydroxypregn-1-ene-3,11-dione [M-H]- C21H30O5 NIST 1111692---Cortisol C21H30O5 MoNA 440132	MS2	M+Cl	282.128	582.95	0	0	0		0	0	0	0.58		0.47	0	0	0.99	1.4	0.47	0.88	1.17	1.69	583.1	583.1	583.1		583.1	583.1	583.1	583.1		583.1	583.1	583.1	583.1	583.1	583.1	583.1	583.1	583.1	0.84	0.98	0.94		0.97	0.95	0.96	0.95
84	17,20,21-Trihydroxypregn-1-ene-3,11-dione [M-H]- C21H30O5 NIST 1111692---Cortisol C21H30O5 MoNA 440132	MS2	M+Cl	240.928	582.95	0.92	0	1.51		0.43	0	0	0.86		0	0	0	0	0	0	0	0	0.32	583.1	583.1	583.1		583.1	583.1	583.1	583.1		583.1	583.1	583.1	583.1	583.1	583.1	583.1	583.1	583.1	0.84	0.98	0.94		0.97	0.95	0.96	0.95
84	17,20,21-Trihydroxypregn-1-ene-3,11-dione [M-H]- C21H30O5 NIST 1111692---Cortisol C21H30O5 MoNA 440132	MS2	M+Cl	189.091	582.95	0	0	0		0	0	0	0		0	0	0	0.38	0.29	0.48	1.3	0	1.01	583.1	583.1	583.1		583.1	583.1	583.1	583.1		583.1	583.1	583.1	583.1	583.1	583.1	583.1	583.1	583.1	0.84	0.98	0.94		0.97	0.95	0.96	0.95
85	Cortisone C21H28O5 MoNA 436446---Cortisone [M-H]- C21H28O5 NIST 1060530	MS1	M+HCOO	405.191	575.94	5.48	5.95	5.96	14.2	17.74	16.85	35.09	33.47	35.27	64.51	68.35	70.49	168.87	174.48	168.34	329.27	338.95	348.4	575.4	575.4	575.4	575.4	575.4	575.4	575.4	575.4	575.4	575.4	575.4	575.4	575.4	575.4	575.4	575.4	575.4	575.4	0.98	0.95	0.91	0.98	0.99	0.98	0.99	0.97
85	Cortisone C21H28O5 MoNA 436446---Cortisone [M-H]- C21H28O5 NIST 1060530	MS2	M+HCOO	329.176	575.94	10.22	9.11	10.44	25.91	27.35	30.72	64.03	58.32	67.7	137.94	142.23	147.66	369.27	353.26	344.53	663.99	684.16	653.06	575.4	575.4	575.4	575.4	575.4	575.4	575.4	575.4	575.4	575.4	575.4	575.4	575.4	575.4	575.4	575.4	575.4	575.4	0.98	0.95	0.91	0.98	0.99	0.98	0.99	0.97
85	Cortisone C21H28O5 MoNA 436446---Cortisone [M-H]- C21H28O5 NIST 1060530	MS2	M+HCOO	301.182	575.94	1.45	2.66	1.88	7.9	4.17	2.42	9.67	8.52	11.38	19.82	19.14	22.07	54.85	48.25	58.24	107.24	120.69	109.78	575.4	575.4	575.4	575.4	575.4	575.4	575.4	575.4	575.4	575.4	575.4	575.4	575.4	575.4	575.4	575.4	575.4	575.4	0.98	0.95	0.91	0.98	0.99	0.98	0.99	0.97
85	Cortisone C21H28O5 MoNA 436446---Cortisone [M-H]- C21H28O5 NIST 1060530	MS2	M+HCOO	311.166	575.94	0.73	1.41	0	1.35	2.39	3.19	2.46	5.3	5.16	9.53	10.11	11.15	20.94	23.16	23.14	46.07	51.23	53.01	575.4	575.4	575.4	575.4	575.4	575.4	575.4	575.4	575.4	575.4	575.4	575.4	575.4	575.4	575.4	575.4	575.4	575.4	0.98	0.95	0.91	0.98	0.99	0.98	0.99	0.97
85	Cortisone C21H28O5 MoNA 436446---Cortisone [M-H]- C21H28O5 NIST 1060530	MS2	M+HCOO	137.061	575.94	0.37	0.74	0	1.02	1.3	0.45	2.12	2.98	2.73	7.8	4.61	5.5	13.11	11.64	13.82	24.37	27.26	26.97	575.4	575.4	575.4	575.4	575.4	575.4	575.4	575.4	575.4	575.4	575.4	575.4	575.4	575.4	575.4	575.4	575.4	575.4	0.98	0.95	0.91	0.98	0.99	0.98	0.99	0.97
85	Cortisone C21H28O5 MoNA 436446---Cortisone [M-H]- C21H28O5 NIST 1060530	MS2	M+HCOO	257.154	575.94	0	0	0	0.33	0	0.56	0.45	0	0.78	2.29	1.11	2.35	6.38	4.75	4.93	8.57	8.54	9.6	575.4	575.4	575.4	575.4	575.4	575.4	575.4	575.4	575.4	575.4	575.4	575.4	575.4	575.4	575.4	575.4	575.4	575.4	0.98	0.95	0.91	0.98	0.99	0.98	0.99	0.97
85	Cortisone C21H28O5 MoNA 436446---Cortisone [M-H]- C21H28O5 NIST 1060530	MS2	M+HCOO	341.178	575.94	0	0.51	0.38	0	0.77	0.9	1.19	2.95	0.77	2.18	3.21	4.56	6.36	6.3	11.12	15.04	19.55	15.29	575.4	575.4	575.4	575.4	575.4	575.4	575.4	575.4	575.4	575.4	575.4	575.4	575.4	575.4	575.4	575.4	575.4	575.4	0.98	0.95	0.91	0.98	0.99	0.98	0.99	0.97
86	17,20,21-Trihydroxypregn-1-ene-3,11-dione [M-H]- C21H30O5 NIST 1111691	MS1	M+HCOO	407.206	505.63																4.35																		505
86	17,20,21-Trihydroxypregn-1-ene-3,11-dione [M-H]- C21H30O5 NIST 1111691	MS2	M+HCOO	331.193	505.63																1.45																		505
86	17,20,21-Trihydroxypregn-1-ene-3,11-dione [M-H]- C21H30O5 NIST 1111691	MS2	M+HCOO	310.969	505.63																0																		505
86	17,20,21-Trihydroxypregn-1-ene-3,11-dione [M-H]- C21H30O5 NIST 1111691	MS2	M+HCOO	344.942	505.63																0																		505
86	17,20,21-Trihydroxypregn-1-ene-3,11-dione [M-H]- C21H30O5 NIST 1111691	MS2	M+HCOO	270.904	505.63																0.34																		505
86	17,20,21-Trihydroxypregn-1-ene-3,11-dione [M-H]- C21H30O5 NIST 1111691	MS2	M+HCOO	248.963	505.63																0																		505
86	17,20,21-Trihydroxypregn-1-ene-3,11-dione [M-H]- C21H30O5 NIST 1111691	MS2	M+HCOO	604.75	505.63																0																		505
87	Cortisol C21H30O5 MoNA 440132	MS1	M+HCOO	407.207	582.95	112.26	114.16	107.29	274.56	269.62	268.03	555.5	519.83	581.63	1074.24	1093.32	1017.35	2718.71	2777.65	2671.28	5400.84	5467.32	5562.3	583.1	583.1	583.1	583.1	583.1	583.1	583.1	583.1	583.1	583.1	583.1	583.1	583.1	583.1	583.1	583.1	583.1	583.1	0.98	0.99	0.99	0.98	0.98	0.98	0.99	0.99
87	Cortisol C21H30O5 MoNA 440132	MS2	M+HCOO	331.192	582.95	114.36	97.37	103.84	251.76	277.14	299.45	639.76	551.26	581.37	1181.43	1129.32	1030.66	2892.18	2929.93	3021.28	6049.97	6059.99	5687.22	583.1	583.1	583.1	583.1	583.1	583.1	583.1	583.1	583.1	583.1	583.1	583.1	583.1	583.1	583.1	583.1	583.1	583.1	0.98	0.99	0.99	0.98	0.98	0.98	0.99	0.99
87	Cortisol C21H30O5 MoNA 440132	MS2	M+HCOO	297.15	582.95	16.49	18.71	14.66	37.3	47.6	48.76	102.58	101.98	105.65	191.33	212.16	184.69	537.59	495.81	579.97	1089.02	986.46	1024.24	583.1	583.1	583.1	583.1	583.1	583.1	583.1	583.1	583.1	583.1	583.1	583.1	583.1	583.1	583.1	583.1	583.1	583.1	0.98	0.99	0.99	0.98	0.98	0.98	0.99	0.99
87	Cortisol C21H30O5 MoNA 440132	MS2	M+HCOO	282.127	582.95	4.03	6.2	6.61	12.16	11.57	11.28	30.98	35.58	32.31	58.63	67.3	54.08	155.21	137.08	190.59	333.86	292.05	344.93	583.1	583.1	583.1	583.1	583.1	583.1	583.1	583.1	583.1	583.1	583.1	583.1	583.1	583.1	583.1	583.1	583.1	583.1	0.98	0.99	0.99	0.98	0.98	0.98	0.99	0.99
87	Cortisol C21H30O5 MoNA 440132	MS2	M+HCOO	315.16	582.95	6.06	6.42	6.24	14.37	15.58	18.23	42.57	38.09	31.84	73.37	77.82	76.53	200.33	172.86	210.12	391.93	389.53	378.58	583.1	583.1	583.1	583.1	583.1	583.1	583.1	583.1	583.1	583.1	583.1	583.1	583.1	583.1	583.1	583.1	583.1	583.1	0.98	0.99	0.99	0.98	0.98	0.98	0.99	0.99
87	Cortisol C21H30O5 MoNA 440132	MS2	M+HCOO	407.208	582.95	15.5	13.77	12.79	28.02	34.8	38.56	79.78	71.31	63.69	126.96	143.47	135.03	402.07	451.38	414.23	789.7	731.26	772.42	583.1	583.1	583.1	583.1	583.1	583.1	583.1	583.1	583.1	583.1	583.1	583.1	583.1	583.1	583.1	583.1	583.1	583.1	0.98	0.99	0.99	0.98	0.98	0.98	0.99	0.99
87	Cortisol C21H30O5 MoNA 440132	MS2	M+HCOO	343.192	582.95	2.58	3.1	6.78	6.92	7.61	8.58	17.4	18.62	18.85	37.8	29.75	31.23	95.36	89.97	95.2	204.52	185.77	170.78	583.1	583.1	583.1	583.1	583.1	583.1	583.1	583.1	583.1	583.1	583.1	583.1	583.1	583.1	583.1	583.1	583.1	583.1	0.98	0.99	0.99	0.98	0.98	0.98	0.99	0.99
88	17,20,21-Trihydroxypregn-1-ene-3,11-dione [M-H]- C21H30O5 NIST 1111692	MS1	M+HCOO	407.207	566.43				9.7			19.05	20.32		45.09	45.06	32.92	6.54	4.92	5.72	12.91	12.7	14.68				566.4			566.4	566.4		566.4	566.4	566.4	567.7	566.6	566.6	566.6	567.7	567.7				0.96			0.92	0.96
88	17,20,21-Trihydroxypregn-1-ene-3,11-dione [M-H]- C21H30O5 NIST 1111692	MS2	M+HCOO	331.19	566.43				20.67			56	45.84		104.28	68.97	70.32	6.59	4.5	7.17	9.76	10.59	15.1				566.4			566.4	566.4		566.4	566.4	566.4	567.7	566.6	566.6	566.6	567.7	567.7				0.96			0.92	0.96
88	17,20,21-Trihydroxypregn-1-ene-3,11-dione [M-H]- C21H30O5 NIST 1111692	MS2	M+HCOO	313.181	566.43				0.8			0.71	0.43		2.1	1.23	2.09	1.85	2.09	2.83	6.15	7.53	4.01				566.4			566.4	566.4		566.4	566.4	566.4	567.7	566.6	566.6	566.6	567.7	567.7				0.96			0.92	0.96
88	17,20,21-Trihydroxypregn-1-ene-3,11-dione [M-H]- C21H30O5 NIST 1111692	MS2	M+HCOO	343.191	566.43				0			0	0		0	0	2.16	0	0	0	1.16	0.84	0				566.4			566.4	566.4		566.4	566.4	566.4	567.7	566.6	566.6	566.6	567.7	567.7				0.96			0.92	0.96
88	17,20,21-Trihydroxypregn-1-ene-3,11-dione [M-H]- C21H30O5 NIST 1111692	MS2	M+HCOO	229.161	566.43				0			0	0		0	0	0	0	0	0	0	0	0				566.4			566.4	566.4		566.4	566.4	566.4	567.7	566.6	566.6	566.6	567.7	567.7				0.96			0.92	0.96
88	17,20,21-Trihydroxypregn-1-ene-3,11-dione [M-H]- C21H30O5 NIST 1111692	MS2	M+HCOO	407.203	566.43				0			0	0		0	0	0	0	0.84	0	0.84	1.97	0				566.4			566.4	566.4		566.4	566.4	566.4	567.7	566.6	566.6	566.6	567.7	567.7				0.96			0.92	0.96
88	17,20,21-Trihydroxypregn-1-ene-3,11-dione [M-H]- C21H30O5 NIST 1111692	MS2	M+HCOO	343.204	566.43				0			0	0		0	0	0	0	0	0	0.26	0	0				566.4			566.4	566.4		566.4	566.4	566.4	567.7	566.6	566.6	566.6	567.7	567.7				0.96			0.92	0.96
89	Allocholic acid C24H40O5 MoNA 439335---Allocholic acid C24H40O5 MoNA 439336---Allocholic acid C24H40O5 MoNA 440683---Allocholic acid C24H40O5 MoNA 440684---Cholic acid C24H40O5 MoNA 439335---Cholic acid C24H40O5 MoNA 439336---Cholic acid C24H40O5 MoNA 440683---Cholic acid C24H40O5 MoNA 440684	MS1	M-H	407.279	697.01											10.56		30.18	33.27	33.47	62.92	63.28	66.95											696.4		696.4	697.5	696.4	696.4	696.4	696.4
89	Allocholic acid C24H40O5 MoNA 439335---Allocholic acid C24H40O5 MoNA 439336---Allocholic acid C24H40O5 MoNA 440683---Allocholic acid C24H40O5 MoNA 440684---Cholic acid C24H40O5 MoNA 439335---Cholic acid C24H40O5 MoNA 439336---Cholic acid C24H40O5 MoNA 440683---Cholic acid C24H40O5 MoNA 440684	MS2	M-H	407.28	697.01											15.24		28.68	37.08	28.8	56.78	60.85	67.52											696.4		696.4	697.5	696.4	696.4	696.4	696.4
89	Allocholic acid C24H40O5 MoNA 439335---Allocholic acid C24H40O5 MoNA 439336---Allocholic acid C24H40O5 MoNA 440683---Allocholic acid C24H40O5 MoNA 440684---Cholic acid C24H40O5 MoNA 439335---Cholic acid C24H40O5 MoNA 439336---Cholic acid C24H40O5 MoNA 440683---Cholic acid C24H40O5 MoNA 440684	MS2	M-H	343.265	697.01											0		1.1	0	0.39	2.32	2.65	3.23											696.4		696.4	697.5	696.4	696.4	696.4	696.4
89	Allocholic acid C24H40O5 MoNA 439335---Allocholic acid C24H40O5 MoNA 439336---Allocholic acid C24H40O5 MoNA 440683---Allocholic acid C24H40O5 MoNA 440684---Cholic acid C24H40O5 MoNA 439335---Cholic acid C24H40O5 MoNA 439336---Cholic acid C24H40O5 MoNA 440683---Cholic acid C24H40O5 MoNA 440684	MS2	M-H	345.283	697.01											0.13		0	1.42	2.19	2.2	0.39	1.17											696.4		696.4	697.5	696.4	696.4	696.4	696.4
89	Allocholic acid C24H40O5 MoNA 439335---Allocholic acid C24H40O5 MoNA 439336---Allocholic acid C24H40O5 MoNA 440683---Allocholic acid C24H40O5 MoNA 440684---Cholic acid C24H40O5 MoNA 439335---Cholic acid C24H40O5 MoNA 439336---Cholic acid C24H40O5 MoNA 440683---Cholic acid C24H40O5 MoNA 440684	MS2	M-H	289.216	697.01											0		0	0.24	1.06	0	0.47	0											696.4		696.4	697.5	696.4	696.4	696.4	696.4
89	Allocholic acid C24H40O5 MoNA 439335---Allocholic acid C24H40O5 MoNA 439336---Allocholic acid C24H40O5 MoNA 440683---Allocholic acid C24H40O5 MoNA 440684---Cholic acid C24H40O5 MoNA 439335---Cholic acid C24H40O5 MoNA 439336---Cholic acid C24H40O5 MoNA 440683---Cholic acid C24H40O5 MoNA 440684	MS2	M-H	406.013	697.01											0		0	0	0	0.84	0	0											696.4		696.4	697.5	696.4	696.4	696.4	696.4
89	Allocholic acid C24H40O5 MoNA 439335---Allocholic acid C24H40O5 MoNA 439336---Allocholic acid C24H40O5 MoNA 440683---Allocholic acid C24H40O5 MoNA 440684---Cholic acid C24H40O5 MoNA 439335---Cholic acid C24H40O5 MoNA 439336---Cholic acid C24H40O5 MoNA 440683---Cholic acid C24H40O5 MoNA 440684	MS2	M-H	327.273	697.01											0		0	0	0	0	0	0											696.4		696.4	697.5	696.4	696.4	696.4	696.4
90	(-)-Riboflavin; LC-ESI-QTOF; MS2; CE C17H20N4O6---Riboflavin C17H20N4O6	MS1	M+Cl	411.106	425.79	0.26			1.03	0.79	0.7	2.99	2.72	2.94	6.75	6.62	7.49	22.08	18.78	16.81	42.62	46.9	45.53	425.8			425.8	425.8	425.8	425.8	425.8	425.8	424.7	425.8	425.8	425.8	425.8	425.8	425.8	425.8	425.8	0.96			0.95	0.98	0.98	0.99	0.98
90	(-)-Riboflavin; LC-ESI-QTOF; MS2; CE C17H20N4O6---Riboflavin C17H20N4O6	MS2	M+Cl	255.088	425.79	19.47			32.68	45.08	50.8	87.6	112.54	104.04	208.87	198.2	215.1	498.59	431.99	477.68	1069.43	888.9	931.61	425.8			425.8	425.8	425.8	425.8	425.8	425.8	424.7	425.8	425.8	425.8	425.8	425.8	425.8	425.8	425.8	0.96			0.95	0.98	0.98	0.99	0.98
90	(-)-Riboflavin; LC-ESI-QTOF; MS2; CE C17H20N4O6---Riboflavin C17H20N4O6	MS2	M+Cl	212.084	425.79	1.12			2.33	1.67	3.66	4.42	5.26	6.56	11.01	11.59	10.16	27.7	28.07	26.53	54.96	69.29	54.37	425.8			425.8	425.8	425.8	425.8	425.8	425.8	424.7	425.8	425.8	425.8	425.8	425.8	425.8	425.8	425.8	0.96			0.95	0.98	0.98	0.99	0.98
90	(-)-Riboflavin; LC-ESI-QTOF; MS2; CE C17H20N4O6---Riboflavin C17H20N4O6	MS2	M+Cl	375.13	425.79	1.08			1.55	5.66	4.9	10.37	11.59	11.14	20.66	25.23	32.05	40.45	46.88	55.42	135.04	99.29	87.56	425.8			425.8	425.8	425.8	425.8	425.8	425.8	424.7	425.8	425.8	425.8	425.8	425.8	425.8	425.8	425.8	0.96			0.95	0.98	0.98	0.99	0.98
90	(-)-Riboflavin; LC-ESI-QTOF; MS2; CE C17H20N4O6---Riboflavin C17H20N4O6	MS2	M+Cl	241.071	425.79	0			0	0.33	0.65	2.38	2.59	1.72	3.36	2.64	4.33	9.17	8.92	8.22	19.63	13.52	15.09	425.8			425.8	425.8	425.8	425.8	425.8	425.8	424.7	425.8	425.8	425.8	425.8	425.8	425.8	425.8	425.8	0.96			0.95	0.98	0.98	0.99	0.98
90	(-)-Riboflavin; LC-ESI-QTOF; MS2; CE C17H20N4O6---Riboflavin C17H20N4O6	MS2	M+Cl	411.098	425.79	0			0	0	0	0	0	0	0.56	0	0	0.28	1.55	0	1.83	2.19	2.34	425.8			425.8	425.8	425.8	425.8	425.8	425.8	424.7	425.8	425.8	425.8	425.8	425.8	425.8	425.8	425.8	0.96			0.95	0.98	0.98	0.99	0.98
90	(-)-Riboflavin; LC-ESI-QTOF; MS2; CE C17H20N4O6---Riboflavin C17H20N4O6	MS2	M+Cl	184.091	425.79	0			0	0	0	0.28	1.04	0.38	0.75	0.24	0	1.52	0.94	0.85	3.41	3.93	2.56	425.8			425.8	425.8	425.8	425.8	425.8	425.8	424.7	425.8	425.8	425.8	425.8	425.8	425.8	425.8	425.8	0.96			0.95	0.98	0.98	0.99	0.98
91	FAHFA 25:0; FAHFA 16:0/9:0; [M-H]- C25H48O4	MS1	M-H	411.347	819.74	44.48	59.62	49.57	53.55	29.37	54.55	29.13	30.47	50.2	33.36	45.82	46.72	44.46	52.23	54.1	56.13	28.39	46.26	821.8	824	822.9	822.9	819.7	821.8	819.7	819.7	824	820.7	821.8	824	822.9	825.1	825.1	824	819.7	822.9	0.9	0.92	0.9	0.92	0.86	0.9	0.88	0.9
91	FAHFA 25:0; FAHFA 16:0/9:0; [M-H]- C25H48O4	MS2	M-H	255.234	819.74	51.05	83.36	69.34	93.49	27.3	73.48	27.26	26.41	61.34	29.66	51.67	62.85	30.69	68.02	84.58	79.27	24.98	51.07	821.8	824	822.9	822.9	819.7	821.8	819.7	819.7	824	820.7	821.8	824	822.9	825.1	825.1	824	819.7	822.9	0.9	0.92	0.9	0.92	0.86	0.9	0.88	0.9
91	FAHFA 25:0; FAHFA 16:0/9:0; [M-H]- C25H48O4	MS2	M-H	173.118	819.74	13.41	15.02	14.38	17.26	6.86	15.09	8.4	6.96	11.54	8.11	11.55	12.01	11.91	12.38	17.06	12.09	6.95	10.43	821.8	824	822.9	822.9	819.7	821.8	819.7	819.7	824	820.7	821.8	824	822.9	825.1	825.1	824	819.7	822.9	0.9	0.92	0.9	0.92	0.86	0.9	0.88	0.9
91	FAHFA 25:0; FAHFA 16:0/9:0; [M-H]- C25H48O4	MS2	M-H	411.351	819.74	7.9	11.8	7.83	6.69	4.51	10.51	8.1	5.71	10.22	7.13	8.32	0	10.1	13.13	5.91	8.62	10.93	6.01	821.8	824	822.9	822.9	819.7	821.8	819.7	819.7	824	820.7	821.8	824	822.9	825.1	825.1	824	819.7	822.9	0.9	0.92	0.9	0.92	0.86	0.9	0.88	0.9
91	FAHFA 25:0; FAHFA 16:0/9:0; [M-H]- C25H48O4	MS2	M-H	411.273	819.74	0	0	0	0	0	0	0	1.55	0	0.99	0	0	0	0	0	0	0.28	0	821.8	824	822.9	822.9	819.7	821.8	819.7	819.7	824	820.7	821.8	824	822.9	825.1	825.1	824	819.7	822.9	0.9	0.92	0.9	0.92	0.86	0.9	0.88	0.9
91	FAHFA 25:0; FAHFA 16:0/9:0; [M-H]- C25H48O4	MS2	M-H	411.136	819.74	0	0	0	0	0	2.25	0	2.67	0	0	0	0	0	0	0	0	0	2.82	821.8	824	822.9	822.9	819.7	821.8	819.7	819.7	824	820.7	821.8	824	822.9	825.1	825.1	824	819.7	822.9	0.9	0.92	0.9	0.92	0.86	0.9	0.88	0.9
91	FAHFA 25:0; FAHFA 16:0/9:0; [M-H]- C25H48O4	MS2	M-H	365.378	819.74	0	0	0	0	0	0	0	0	0	0	0	0	0	0	0	0	0	0.66	821.8	824	822.9	822.9	819.7	821.8	819.7	819.7	824	820.7	821.8	824	822.9	825.1	825.1	824	819.7	822.9	0.9	0.92	0.9	0.92	0.86	0.9	0.88	0.9
92	Riboflavin C17H20N4O6	MS1	M+HCOO	421.135	425.79	2.02	2.27	1.84	6.69	6.3	6.44	15.02	15.67	13.71	30.09	33.17	29.46	79.12	74.97	81.2	159.35	162.42	150.19	425.8	425.8	425.8	425.8	425.8	425.8	425.8	425.8	425.8	425.8	425.8	425.8	425.8	425.8	425.8	425.8	425.8	425.8	0.97	0.96	0.97	0.97	0.98	0.99	0.98	0.99
92	Riboflavin C17H20N4O6	MS2	M+HCOO	255.089	425.79	19.47	19.49	19.98	29.65	34.04	49.55	85.63	108.58	100.59	212.63	198.2	215.1	498.59	431.99	477.68	1080.69	902.48	931.61	425.8	425.8	425.8	425.8	425.8	425.8	425.8	425.8	425.8	425.8	425.8	425.8	425.8	425.8	425.8	425.8	425.8	425.8	0.97	0.96	0.97	0.97	0.98	0.99	0.98	0.99
92	Riboflavin C17H20N4O6	MS2	M+HCOO	212.083	425.79	1.12	0.41	1.07	2.33	1.52	3.66	3.92	5.26	6.56	11.21	11.59	10.16	27.7	28.07	26.53	55.78	70.4	54.37	425.8	425.8	425.8	425.8	425.8	425.8	425.8	425.8	425.8	425.8	425.8	425.8	425.8	425.8	425.8	425.8	425.8	425.8	0.97	0.96	0.97	0.97	0.98	0.99	0.98	0.99
92	Riboflavin C17H20N4O6	MS2	M+HCOO	375.131	425.79	1.08	1.55	2.08	1.55	3.94	4.9	11.18	11.59	11.14	21.54	25.23	32.05	40.45	46.88	55.42	135.65	99.82	87.56	425.8	425.8	425.8	425.8	425.8	425.8	425.8	425.8	425.8	425.8	425.8	425.8	425.8	425.8	425.8	425.8	425.8	425.8	0.97	0.96	0.97	0.97	0.98	0.99	0.98	0.99
92	Riboflavin C17H20N4O6	MS2	M+HCOO	241.074	425.79	0	0	0	0	0.33	0.65	1.74	1.29	1.19	3.25	2.64	4.33	9.17	8.92	8.22	19.85	14.99	15.09	425.8	425.8	425.8	425.8	425.8	425.8	425.8	425.8	425.8	425.8	425.8	425.8	425.8	425.8	425.8	425.8	425.8	425.8	0.97	0.96	0.97	0.97	0.98	0.99	0.98	0.99
92	Riboflavin C17H20N4O6	MS2	M+HCOO	240.064	425.79	0	0	0	0	0	0	0.54	0.54	0.22	0.65	0.54	0.54	0.75	1.79	4.86	5.13	5.45	1.72	425.8	425.8	425.8	425.8	425.8	425.8	425.8	425.8	425.8	425.8	425.8	425.8	425.8	425.8	425.8	425.8	425.8	425.8	0.97	0.96	0.97	0.97	0.98	0.99	0.98	0.99
92	Riboflavin C17H20N4O6	MS2	M+HCOO	257.104	425.79	0	0	0.22	0.72	0.72	0	1.95	1.28	3.12	3.29	3.8	3.09	8.81	7.5	10.76	19.24	17.41	12.71	425.8	425.8	425.8	425.8	425.8	425.8	425.8	425.8	425.8	425.8	425.8	425.8	425.8	425.8	425.8	425.8	425.8	425.8	0.97	0.96	0.97	0.97	0.98	0.99	0.98	0.99
93	Adenosine 5'-diphosphate [M-H]- C10H15N5O10P2 NIST 1161684---Adenosine 5'-diphosphate [M-H]- C10H15N5O10P2 NIST 1161685	MS1	M-H	426.02	895.23												8.92	10.94	15.53	9.1	20.57	27	26.22												895.2	890	895.2	893.3	895.2	895.2	895.2
93	Adenosine 5'-diphosphate [M-H]- C10H15N5O10P2 NIST 1161684---Adenosine 5'-diphosphate [M-H]- C10H15N5O10P2 NIST 1161685	MS2	M-H	426.021	895.23												3.15	4.16	7.77	2.31	10.28	9.68	11.67												895.2	890	895.2	893.3	895.2	895.2	895.2
93	Adenosine 5'-diphosphate [M-H]- C10H15N5O10P2 NIST 1161684---Adenosine 5'-diphosphate [M-H]- C10H15N5O10P2 NIST 1161685	MS2	M-H	328.045	895.23												0.5	0	0	0.19	0	1.57	1.51												895.2	890	895.2	893.3	895.2	895.2	895.2
93	Adenosine 5'-diphosphate [M-H]- C10H15N5O10P2 NIST 1161684---Adenosine 5'-diphosphate [M-H]- C10H15N5O10P2 NIST 1161685	MS2	M-H	134.048	895.23												2.37	0.44	3.09	2.3	3.5	3.66	3.93												895.2	890	895.2	893.3	895.2	895.2	895.2
93	Adenosine 5'-diphosphate [M-H]- C10H15N5O10P2 NIST 1161684---Adenosine 5'-diphosphate [M-H]- C10H15N5O10P2 NIST 1161685	MS2	M-H	158.926	895.23												2.19	1.62	3.09	2.77	7.84	6.45	7.12												895.2	890	895.2	893.3	895.2	895.2	895.2
93	Adenosine 5'-diphosphate [M-H]- C10H15N5O10P2 NIST 1161684---Adenosine 5'-diphosphate [M-H]- C10H15N5O10P2 NIST 1161685	MS2	M-H	408.014	895.23												3.31	0	1.68	0	2.87	2.66	3.08												895.2	890	895.2	893.3	895.2	895.2	895.2
93	Adenosine 5'-diphosphate [M-H]- C10H15N5O10P2 NIST 1161684---Adenosine 5'-diphosphate [M-H]- C10H15N5O10P2 NIST 1161685	MS2	M-H	78.9608	895.23												0	0	0.77	0.19	1.39	0	1.49												895.2	890	895.2	893.3	895.2	895.2	895.2
94	Ursodeoxycholic acid [2M-H]- C24H40O4 NIST 1173708	MS1	M+HCOO	437.29	676.33										3.4	3.47	3.98	8.95	8.47	9.13	15.43	19.75	19.96										675.5	676.3	676.6	676.6	677.7	676.6	676.6	676.6	676.6
94	Ursodeoxycholic acid [2M-H]- C24H40O4 NIST 1173708	MS2	M+HCOO	391.285	676.33										10.19	7.51	7.8	16.04	19.12	19.46	27.03	45.72	40.83										675.5	676.3	676.6	676.6	677.7	676.6	676.6	676.6	676.6
94	Ursodeoxycholic acid [2M-H]- C24H40O4 NIST 1173708	MS2	M+HCOO	61.9888	676.33										3.72	10.79	2.29	5.08	5.57	5.05	4.13	7.57	5.79										675.5	676.3	676.6	676.6	677.7	676.6	676.6	676.6	676.6
94	Ursodeoxycholic acid [2M-H]- C24H40O4 NIST 1173708	MS2	M+HCOO	375.246	676.33										0	0	0	0.27	0	0	0	0	0.67										675.5	676.3	676.6	676.6	677.7	676.6	676.6	676.6	676.6
94	Ursodeoxycholic acid [2M-H]- C24H40O4 NIST 1173708	MS2	M+HCOO	390.065	676.33										0	0	0	0	0	0	0	0	0										675.5	676.3	676.6	676.6	677.7	676.6	676.6	676.6	676.6
94	Ursodeoxycholic acid [2M-H]- C24H40O4 NIST 1173708	MS2	M+HCOO	437.293	676.33										0.44	0	0	0	0	0	1.6	0.29	0.29										675.5	676.3	676.6	676.6	677.7	676.6	676.6	676.6	676.6
94	Ursodeoxycholic acid [2M-H]- C24H40O4 NIST 1173708	MS2	M+HCOO	392.824	676.33										0	0	0	0	0	0	0	0	0.28										675.5	676.3	676.6	676.6	677.7	676.6	676.6	676.6	676.6
95	FAHFA 27:0; FAHFA 18:0/9:0; [M-H]- C27H52O4	MS1	M-H	439.378	821.2	80.11	75.16	70.56	87.65	75.65	74.81	76.18	84.06	82.17	80.22	73.34	70.25	84.02	56.59	73.12	76.57	68.29	58.11	821.8	821.8	819.6	821.8	820.7	820.7	820.7	821.8	821.8	821.8	820.7	820.7	820.7	821.2	817.4	819.6	820.7	821.2	0.94	0.94	0.94	0.91	0.89	0.87	0.94	0.94
95	FAHFA 27:0; FAHFA 18:0/9:0; [M-H]- C27H52O4	MS2	M-H	283.265	821.2	86.9	82.39	89.26	94.64	83.31	85.45	86.22	94.9	87.44	86.41	84.88	77.27	89.11	58.71	85.25	86.05	78.44	51	821.8	821.8	819.6	821.8	820.7	820.7	820.7	821.8	821.8	821.8	820.7	820.7	820.7	821.2	817.4	819.6	820.7	821.2	0.94	0.94	0.94	0.91	0.89	0.87	0.94	0.94
95	FAHFA 27:0; FAHFA 18:0/9:0; [M-H]- C27H52O4	MS2	M-H	173.118	821.2	31.17	23.86	24.57	37.72	28.19	25.99	30.32	34.54	34.96	31.09	28.17	26.19	34.03	23.43	33.3	28.23	29.57	21.34	821.8	821.8	819.6	821.8	820.7	820.7	820.7	821.8	821.8	821.8	820.7	820.7	820.7	821.2	817.4	819.6	820.7	821.2	0.94	0.94	0.94	0.91	0.89	0.87	0.94	0.94
95	FAHFA 27:0; FAHFA 18:0/9:0; [M-H]- C27H52O4	MS2	M-H	439.379	821.2	24.37	27.58	25.83	30.11	29.25	26.36	19.78	31.66	30.21	30.71	25.74	24.82	26.55	21.29	25.38	17.58	31.04	19.33	821.8	821.8	819.6	821.8	820.7	820.7	820.7	821.8	821.8	821.8	820.7	820.7	820.7	821.2	817.4	819.6	820.7	821.2	0.94	0.94	0.94	0.91	0.89	0.87	0.94	0.94
95	FAHFA 27:0; FAHFA 18:0/9:0; [M-H]- C27H52O4	MS2	M-H	439.419	821.2	2.18	0	0	0	0	0	0	0	0	0	1.89	0	0	0	0	2.99	0	0	821.8	821.8	819.6	821.8	820.7	820.7	820.7	821.8	821.8	821.8	820.7	820.7	820.7	821.2	817.4	819.6	820.7	821.2	0.94	0.94	0.94	0.91	0.89	0.87	0.94	0.94
95	FAHFA 27:0; FAHFA 18:0/9:0; [M-H]- C27H52O4	MS2	M-H	393.38	821.2	0	2.07	0	0	0	0	0	0	0	0	0	1.1	0	0	0	0.96	0	0	821.8	821.8	819.6	821.8	820.7	820.7	820.7	821.8	821.8	821.8	820.7	820.7	820.7	821.2	817.4	819.6	820.7	821.2	0.94	0.94	0.94	0.91	0.89	0.87	0.94	0.94
95	FAHFA 27:0; FAHFA 18:0/9:0; [M-H]- C27H52O4	MS2	M-H	155.11	821.2	0	1.04	1.78	0	0	0	1.04	1.95	1.17	1.47	0	0	0	2.81	1.3	1.56	1.9	1.04	821.8	821.8	819.6	821.8	820.7	820.7	820.7	821.8	821.8	821.8	820.7	820.7	820.7	821.2	817.4	819.6	820.7	821.2	0.94	0.94	0.94	0.91	0.89	0.87	0.94	0.94
96	Cholic acid C24H40O5	MS1	M+HCOO	453.284	697.01				1.3			2.9			3.36	5.15	4.61	13.79	16.56	16.15	29.53	31.22	35.14				697			696.4			696.4	696.4	696.4	696.4	697.5	696.4	696.4	696.4	696.4				0.78			0.89
96	Cholic acid C24H40O5	MS2	M+HCOO	407.28	697.01				6.47			12.8			20	30.97	32.42	65.75	78.75	76.68	166.43	175.13	171.93				697			696.4			696.4	696.4	696.4	696.4	697.5	696.4	696.4	696.4	696.4				0.78			0.89
96	Cholic acid C24H40O5	MS2	M+HCOO	345.281	697.01				0			0			0	0	0	1.1	0	0	0	0.58	1.48				697			696.4			696.4	696.4	696.4	696.4	697.5	696.4	696.4	696.4	696.4				0.78			0.89
96	Cholic acid C24H40O5	MS2	M+HCOO	343.264	697.01				0			0			0	0	0	0	0.26	0	0	0.51	0				697			696.4			696.4	696.4	696.4	696.4	697.5	696.4	696.4	696.4	696.4				0.78			0.89
96	Cholic acid C24H40O5	MS2	M+HCOO	452.946	697.01				20.35			3.93			2.49	7.26	5.79	6.51	6.61	8.57	6	5.33	9.24				697			696.4			696.4	696.4	696.4	696.4	697.5	696.4	696.4	696.4	696.4				0.78			0.89
96	Cholic acid C24H40O5	MS2	M+HCOO	371.247	697.01				0			0			0	0	0	0	0	0	0	0	0				697			696.4			696.4	696.4	696.4	696.4	697.5	696.4	696.4	696.4	696.4				0.78			0.89
96	Cholic acid C24H40O5	MS2	M+HCOO	325.251	697.01				0			0			0	0	0	0	0	0	0	0	0.25				697			696.4			696.4	696.4	696.4	696.4	697.5	696.4	696.4	696.4	696.4				0.78			0.89
97	Naltrindole C26H26N2O3	MS1	M+HCOO	459.196	623.82								0.83	1.61	2.21	3.07	2.2	7.84	8.38	7.53	16.79	19.7	18.13								623.8	623.8	623.8	622.7	623.8	623.8	623.8	623.8	623.8	623.8	623.8								0.81
97	Naltrindole C26H26N2O3	MS2	M+HCOO	112.985	623.82								15.95	15.11	15.4	3.85	18.92	7.71	13.29	11.85	17.08	24.78	23.43								623.8	623.8	623.8	622.7	623.8	623.8	623.8	623.8	623.8	623.8	623.8								0.81
97	Naltrindole C26H26N2O3	MS2	M+HCOO	459.187	623.82								0.15	0	1.19	0.75	1.19	0	0.74	1.6	3.95	4.85	5.11								623.8	623.8	623.8	622.7	623.8	623.8	623.8	623.8	623.8	623.8	623.8								0.81
97	Naltrindole C26H26N2O3	MS2	M+HCOO	413.178	623.82								0.85	1.77	3.67	0	1.55	4.67	3.75	7.64	7.33	4.38	10.48								623.8	623.8	623.8	622.7	623.8	623.8	623.8	623.8	623.8	623.8	623.8								0.81
97	Naltrindole C26H26N2O3	MS2	M+HCOO	367.178	623.82								1.46	0.67	0	1.47	1	4.62	5.73	0.53	8.07	7	6.24								623.8	623.8	623.8	622.7	623.8	623.8	623.8	623.8	623.8	623.8	623.8								0.81
97	Naltrindole C26H26N2O3	MS2	M+HCOO	413.194	623.82								1.63	0.42	3.12	2.7	2.74	6.64	8	5.2	15.67	13.63	15.57								623.8	623.8	623.8	622.7	623.8	623.8	623.8	623.8	623.8	623.8	623.8								0.81
97	Naltrindole C26H26N2O3	MS2	M+HCOO	68.9961	623.82								0	0	0.69	0.41	0.81	0.96	0.38	1.03	1.45	2.43	2.9								623.8	623.8	623.8	622.7	623.8	623.8	623.8	623.8	623.8	623.8	623.8								0.81
98	Perfluorononanoic acid C9HF17O2 MoNA 435965	MS1	M-H	462.962	687.6	36.18	40.41	46.71	42.34	39.53	38.5	39.88	39.54	38.86	37.61	43.62	39.72	40.97	41.1	39.67	38.92	40	43.32	687.6	687.6	687.6	687.6	687.6	687.6	687.6	687.6	687.6	687.6	687.6	687.6	687.6	687.6	687.6	687.6	687.6	687.6	0.96	0.98	1	0.99	0.97	0.98	0.98	0.97
98	Perfluorononanoic acid C9HF17O2 MoNA 435965	MS2	M-H	418.973	687.6	7.21	13.07	8.63	8.48	18.23	12.96	12.9	15.34	13.81	13.41	9.61	12.04	10.79	9.61	15.69	14.41	11.89	10.98	687.6	687.6	687.6	687.6	687.6	687.6	687.6	687.6	687.6	687.6	687.6	687.6	687.6	687.6	687.6	687.6	687.6	687.6	0.96	0.98	1	0.99	0.97	0.98	0.98	0.97
98	Perfluorononanoic acid C9HF17O2 MoNA 435965	MS2	M-H	168.989	687.6	3.94	5.47	4.43	6.48	4.16	7.2	6.16	4.7	4.98	3.89	5.98	4.52	4.9	4.85	6.37	4.09	3.85	7.07	687.6	687.6	687.6	687.6	687.6	687.6	687.6	687.6	687.6	687.6	687.6	687.6	687.6	687.6	687.6	687.6	687.6	687.6	0.96	0.98	1	0.99	0.97	0.98	0.98	0.97
98	Perfluorononanoic acid C9HF17O2 MoNA 435965	MS2	M-H	218.986	687.6	3.65	8.55	5.77	5.82	6.55	7.51	5.61	6.28	3.35	5.86	4.54	5.66	4.68	2.43	5.41	4.99	5.68	5.66	687.6	687.6	687.6	687.6	687.6	687.6	687.6	687.6	687.6	687.6	687.6	687.6	687.6	687.6	687.6	687.6	687.6	687.6	0.96	0.98	1	0.99	0.97	0.98	0.98	0.97
98	Perfluorononanoic acid C9HF17O2 MoNA 435965	MS2	M-H	268.985	687.6	1.14	2.23	0.57	1.72	1.03	1.77	0.68	0.17	0.74	2.85	0.68	3.42	0.63	0.4	1.66	2.22	0.34	2.51	687.6	687.6	687.6	687.6	687.6	687.6	687.6	687.6	687.6	687.6	687.6	687.6	687.6	687.6	687.6	687.6	687.6	687.6	0.96	0.98	1	0.99	0.97	0.98	0.98	0.97
98	Perfluorononanoic acid C9HF17O2 MoNA 435965	MS2	M-H	350.908	687.6	0	0	0.13	0.39	0	0.26	0	0	0	0	0	0	0	0	0.91	0	0	0	687.6	687.6	687.6	687.6	687.6	687.6	687.6	687.6	687.6	687.6	687.6	687.6	687.6	687.6	687.6	687.6	687.6	687.6	0.96	0.98	1	0.99	0.97	0.98	0.98	0.97
98	Perfluorononanoic acid C9HF17O2 MoNA 435965	MS2	M-H	174.956	687.6	1.15	1.97	1.98	1.25	0	3.08	0.32	1.66	0.55	1.01	1.15	1.63	1.66	1.24	2.16	0	3.13	0	687.6	687.6	687.6	687.6	687.6	687.6	687.6	687.6	687.6	687.6	687.6	687.6	687.6	687.6	687.6	687.6	687.6	687.6	0.96	0.98	1	0.99	0.97	0.98	0.98	0.97
99	Cytidine 5'-diphosphocholine [M-H]- C14H26N4O11P2 NIST 1068498	MS1	M-H	487.099	58.98						2.39	5.43	6.04	7.49	13.34	12.63	11.29	27.35	28.32	29.3	49.96	55.51	54.37						59	58.4	58.4	58.4	58.4	58.4	58.4	58.4	58.4	58.4	58.4	58.4	58.4						0.75	0.81	0.81
99	Cytidine 5'-diphosphocholine [M-H]- C14H26N4O11P2 NIST 1068498	MS2	M-H	428.026	58.98						3.53	3.03	1.66	3.45	3.89	8	3.1	10.87	12.87	9.94	18.12	17.16	17.16						59	58.4	58.4	58.4	58.4	58.4	58.4	58.4	58.4	58.4	58.4	58.4	58.4						0.75	0.81	0.81
99	Cytidine 5'-diphosphocholine [M-H]- C14H26N4O11P2 NIST 1068498	MS2	M-H	304.036	58.98						0.61	1.28	2.55	0.97	5.71	6.38	3.03	7.04	4.8	6.31	10.81	14.36	14.32						59	58.4	58.4	58.4	58.4	58.4	58.4	58.4	58.4	58.4	58.4	58.4	58.4						0.75	0.81	0.81
99	Cytidine 5'-diphosphocholine [M-H]- C14H26N4O11P2 NIST 1068498	MS2	M-H	145.063	58.98						0	0	0	0	0	0	0	2.14	0	0	3.34	4.61	2.39						59	58.4	58.4	58.4	58.4	58.4	58.4	58.4	58.4	58.4	58.4	58.4	58.4						0.75	0.81	0.81
99	Cytidine 5'-diphosphocholine [M-H]- C14H26N4O11P2 NIST 1068498	MS2	M-H	336.064	58.98						0	0	0	0	0	0	0	0.58	0	0	0.64	1.15	0						59	58.4	58.4	58.4	58.4	58.4	58.4	58.4	58.4	58.4	58.4	58.4	58.4						0.75	0.81	0.81
99	Cytidine 5'-diphosphocholine [M-H]- C14H26N4O11P2 NIST 1068498	MS2	M-H	268.013	58.98						0	0	0	0	0	0	0	0	0	0	0	0	0						59	58.4	58.4	58.4	58.4	58.4	58.4	58.4	58.4	58.4	58.4	58.4	58.4						0.75	0.81	0.81
99	Cytidine 5'-diphosphocholine [M-H]- C14H26N4O11P2 NIST 1068498	MS2	M-H	402.009	58.98						0	0	0	0	0	0	0	0	0	0	0	0	0						59	58.4	58.4	58.4	58.4	58.4	58.4	58.4	58.4	58.4	58.4	58.4	58.4						0.75	0.81	0.81
100	Cytidine 5'-diphosphocholine [M-H]- C14H26N4O11P2 NIST 1068496---Cytidine 5'-diphosphocholine [M-H]- C14H26N4O11P2 NIST 1068497---Cytidine 5'-diphosphocholine [M-H]- C14H26N4O11P2 NIST 1068498	MS1	M+HCOO	533.104	58.75	2.32	3.56	3.12	9.46	6.51	6.83	15.58	17.8	15.98	34.23	34.99	29.74	76.38	73.78	71.89	135.84	142.28	138.19	58.8	58.8	58.8	58.4	58.4	58.4	58.4	58.4	58.4	58.4	58.4	58.4	58.4	58.4	58.4	58.4	58.4	58.4	0.95	0.94	0.96	0.97	0.96	0.95	0.92	0.92
100	Cytidine 5'-diphosphocholine [M-H]- C14H26N4O11P2 NIST 1068496---Cytidine 5'-diphosphocholine [M-H]- C14H26N4O11P2 NIST 1068497---Cytidine 5'-diphosphocholine [M-H]- C14H26N4O11P2 NIST 1068498	MS2	M+HCOO	428.026	58.75	7.34	4.48	9.14	15.12	15.2	17.42	26.8	32.2	19.28	61.92	69	55.83	135.39	152.1	128.05	280.66	247.46	288.29	58.8	58.8	58.8	58.4	58.4	58.4	58.4	58.4	58.4	58.4	58.4	58.4	58.4	58.4	58.4	58.4	58.4	58.4	0.95	0.94	0.96	0.97	0.96	0.95	0.92	0.92
100	Cytidine 5'-diphosphocholine [M-H]- C14H26N4O11P2 NIST 1068496---Cytidine 5'-diphosphocholine [M-H]- C14H26N4O11P2 NIST 1068497---Cytidine 5'-diphosphocholine [M-H]- C14H26N4O11P2 NIST 1068498	MS2	M+HCOO	304.034	58.75	2.67	0.97	2.61	6.87	5.11	6.62	8.79	6.86	7.58	18.2	18.01	13.87	40.22	37.61	39.89	76.4	72.53	66.89	58.8	58.8	58.8	58.4	58.4	58.4	58.4	58.4	58.4	58.4	58.4	58.4	58.4	58.4	58.4	58.4	58.4	58.4	0.95	0.94	0.96	0.97	0.96	0.95	0.92	0.92
100	Cytidine 5'-diphosphocholine [M-H]- C14H26N4O11P2 NIST 1068496---Cytidine 5'-diphosphocholine [M-H]- C14H26N4O11P2 NIST 1068497---Cytidine 5'-diphosphocholine [M-H]- C14H26N4O11P2 NIST 1068498	MS2	M+HCOO	487.099	58.75	0.31	0	0.23	1.99	0	3.31	6.61	7.67	7.37	13.9	9.39	7.29	22.95	27.29	15.43	38.74	38.48	39.29	58.8	58.8	58.8	58.4	58.4	58.4	58.4	58.4	58.4	58.4	58.4	58.4	58.4	58.4	58.4	58.4	58.4	58.4	0.95	0.94	0.96	0.97	0.96	0.95	0.92	0.92
100	Cytidine 5'-diphosphocholine [M-H]- C14H26N4O11P2 NIST 1068496---Cytidine 5'-diphosphocholine [M-H]- C14H26N4O11P2 NIST 1068497---Cytidine 5'-diphosphocholine [M-H]- C14H26N4O11P2 NIST 1068498	MS2	M+HCOO	473.084	58.75	0	0	0	0	0.3	0.45	4.08	0	2.57	7.36	6.36	5.31	14.92	17.17	5.37	33.41	30.71	31.6	58.8	58.8	58.8	58.4	58.4	58.4	58.4	58.4	58.4	58.4	58.4	58.4	58.4	58.4	58.4	58.4	58.4	58.4	0.95	0.94	0.96	0.97	0.96	0.95	0.92	0.92
100	Cytidine 5'-diphosphocholine [M-H]- C14H26N4O11P2 NIST 1068496---Cytidine 5'-diphosphocholine [M-H]- C14H26N4O11P2 NIST 1068497---Cytidine 5'-diphosphocholine [M-H]- C14H26N4O11P2 NIST 1068498	MS2	M+HCOO	384.003	58.75	0	0	0	0.27	0	0	0.82	0	0	4.51	2.86	1.98	5.72	7.24	5.18	14.4	10.78	11.53	58.8	58.8	58.8	58.4	58.4	58.4	58.4	58.4	58.4	58.4	58.4	58.4	58.4	58.4	58.4	58.4	58.4	58.4	0.95	0.94	0.96	0.97	0.96	0.95	0.92	0.92
100	Cytidine 5'-diphosphocholine [M-H]- C14H26N4O11P2 NIST 1068496---Cytidine 5'-diphosphocholine [M-H]- C14H26N4O11P2 NIST 1068497---Cytidine 5'-diphosphocholine [M-H]- C14H26N4O11P2 NIST 1068498	MS2	M+HCOO	336.057	58.75	0	0	0	0.57	0	0.51	0	1.54	0	1.85	0.64	1.34	7.29	5.3	5.11	7.98	6.76	8.48	58.8	58.8	58.8	58.4	58.4	58.4	58.4	58.4	58.4	58.4	58.4	58.4	58.4	58.4	58.4	58.4	58.4	58.4	0.95	0.94	0.96	0.97	0.96	0.95	0.92	0.92
101	Adenosine 5'-diphosphoribose [M-H]- C15H23N5O14P2 NIST 1068483---Adenosine 5'-diphosphoribose [M-H]- C15H23N5O14P2 NIST 1068484---Adenosine 5'-diphosphoribose [M-H]- C15H23N5O14P2 NIST 1068486	MS1	M-H	558.063	64.45						4.37	8.79	9.11	7.46	13.87	16.89	18.26	45.79	48.34	45.87	84.31	93.38	90.16						63.9	63.9	65	65	63.9	63.9	63.9	65	63.9	63.9	63.9	63.9	63.9						0.98	0.98	0.95
101	Adenosine 5'-diphosphoribose [M-H]- C15H23N5O14P2 NIST 1068483---Adenosine 5'-diphosphoribose [M-H]- C15H23N5O14P2 NIST 1068484---Adenosine 5'-diphosphoribose [M-H]- C15H23N5O14P2 NIST 1068486	MS2	M-H	346.056	64.45						2.98	10.84	6.86	8.52	14.83	12.23	15.72	41.41	39.14	36.97	73.37	93.23	73.99						63.9	63.9	65	65	63.9	63.9	63.9	65	63.9	63.9	63.9	63.9	63.9						0.98	0.98	0.95
101	Adenosine 5'-diphosphoribose [M-H]- C15H23N5O14P2 NIST 1068483---Adenosine 5'-diphosphoribose [M-H]- C15H23N5O14P2 NIST 1068484---Adenosine 5'-diphosphoribose [M-H]- C15H23N5O14P2 NIST 1068486	MS2	M-H	558.066	64.45						2.13	9.2	12.26	9.35	19.77	16.83	18.33	54.98	59.18	54.24	85.14	95.3	84.1						63.9	63.9	65	65	63.9	63.9	63.9	65	63.9	63.9	63.9	63.9	63.9						0.98	0.98	0.95
101	Adenosine 5'-diphosphoribose [M-H]- C15H23N5O14P2 NIST 1068483---Adenosine 5'-diphosphoribose [M-H]- C15H23N5O14P2 NIST 1068484---Adenosine 5'-diphosphoribose [M-H]- C15H23N5O14P2 NIST 1068486	MS2	M-H	408.014	64.45						0.42	1.12	0	0	2.32	1.12	2.95	3.31	3.31	5.76	4.3	8.83	5.98						63.9	63.9	65	65	63.9	63.9	63.9	65	63.9	63.9	63.9	63.9	63.9						0.98	0.98	0.95
101	Adenosine 5'-diphosphoribose [M-H]- C15H23N5O14P2 NIST 1068483---Adenosine 5'-diphosphoribose [M-H]- C15H23N5O14P2 NIST 1068484---Adenosine 5'-diphosphoribose [M-H]- C15H23N5O14P2 NIST 1068486	MS2	M-H	272.962	64.45						0	0	0	0	0.23	0.23	0	1.78	2.36	0.46	3.48	3.77	4.8						63.9	63.9	65	65	63.9	63.9	63.9	65	63.9	63.9	63.9	63.9	63.9						0.98	0.98	0.95
101	Adenosine 5'-diphosphoribose [M-H]- C15H23N5O14P2 NIST 1068483---Adenosine 5'-diphosphoribose [M-H]- C15H23N5O14P2 NIST 1068484---Adenosine 5'-diphosphoribose [M-H]- C15H23N5O14P2 NIST 1068486	MS2	M-H	426.01	64.45						0	0	0	0	0	0.43	0.86	0.57	0.22	0.57	0	1.36	0.29						63.9	63.9	65	65	63.9	63.9	63.9	65	63.9	63.9	63.9	63.9	63.9						0.98	0.98	0.95
101	Adenosine 5'-diphosphoribose [M-H]- C15H23N5O14P2 NIST 1068483---Adenosine 5'-diphosphoribose [M-H]- C15H23N5O14P2 NIST 1068484---Adenosine 5'-diphosphoribose [M-H]- C15H23N5O14P2 NIST 1068486	MS2	M-H	96.9691	64.45						0.07	0.89	0.1	0	0.96	0.34	0.55	1.54	2.16	1.99	3.49	5.88	2.25						63.9	63.9	65	65	63.9	63.9	63.9	65	63.9	63.9	63.9	63.9	63.9						0.98	0.98	0.95
102	Uridine 5'-diphosphogalactose [M-H]- C15H24N2O17P2 NIST 1174032	MS1	M-H	565.046	57.28	7.5	7.9	7.13	20.58	20.19	17.31	42.51	40.46	39.04	77.97	78.01	77.35	181.39	185.08	180.5	336.38	335.37	351.05	57.3	57.3	57.3	57.3	57.3	57.3	57.3	57.3	57.3	57.3	57.3	57.3	57.3	57.3	57.3	57.3	57.3	57.3	0.96	0.9	0.97	0.98	0.97	0.98	0.99	1
102	Uridine 5'-diphosphogalactose [M-H]- C15H24N2O17P2 NIST 1174032	MS2	M-H	323.029	57.28	9.63	6.2	7.76	22.01	19.16	21.53	43.05	43.41	40.42	89.73	83.27	82.5	210.74	209.2	188.89	388.34	383.99	357.27	57.3	57.3	57.3	57.3	57.3	57.3	57.3	57.3	57.3	57.3	57.3	57.3	57.3	57.3	57.3	57.3	57.3	57.3	0.96	0.9	0.97	0.98	0.97	0.98	0.99	1
102	Uridine 5'-diphosphogalactose [M-H]- C15H24N2O17P2 NIST 1174032	MS2	M-H	565.049	57.28	8.27	6.54	4.11	21.3	18.01	22.76	26.33	28.49	39.88	75.23	85.54	80.79	181.14	183.68	174.33	349.06	351.3	353	57.3	57.3	57.3	57.3	57.3	57.3	57.3	57.3	57.3	57.3	57.3	57.3	57.3	57.3	57.3	57.3	57.3	57.3	0.96	0.9	0.97	0.98	0.97	0.98	0.99	1
102	Uridine 5'-diphosphogalactose [M-H]- C15H24N2O17P2 NIST 1174032	MS2	M-H	384.988	57.28	0.68	3.41	1.47	2.87	3.75	3.68	5.74	11.24	3.62	14.07	15.1	14.34	35.3	34.29	30.85	56.56	56.7	54.27	57.3	57.3	57.3	57.3	57.3	57.3	57.3	57.3	57.3	57.3	57.3	57.3	57.3	57.3	57.3	57.3	57.3	57.3	0.96	0.9	0.97	0.98	0.97	0.98	0.99	1
102	Uridine 5'-diphosphogalactose [M-H]- C15H24N2O17P2 NIST 1174032	MS2	M-H	241.01	57.28	0	0	0.11	2.05	0.75	1.62	3.04	2.12	2.16	5.35	5.35	5.94	14.22	12.48	9.28	25.22	22.1	18.23	57.3	57.3	57.3	57.3	57.3	57.3	57.3	57.3	57.3	57.3	57.3	57.3	57.3	57.3	57.3	57.3	57.3	57.3	0.96	0.9	0.97	0.98	0.97	0.98	0.99	1
102	Uridine 5'-diphosphogalactose [M-H]- C15H24N2O17P2 NIST 1174032	MS2	M-H	320.98	57.28	0.5	1.12	0	1.99	0	0.75	1.56	0.62	1.37	2.18	4.12	2.25	8.35	9.34	5.5	13.58	13.6	13.6	57.3	57.3	57.3	57.3	57.3	57.3	57.3	57.3	57.3	57.3	57.3	57.3	57.3	57.3	57.3	57.3	57.3	57.3	0.96	0.9	0.97	0.98	0.97	0.98	0.99	1
102	Uridine 5'-diphosphogalactose [M-H]- C15H24N2O17P2 NIST 1174032	MS2	M-H	211	57.28	0	0	0	0.71	0.66	0	2.02	1.32	1.67	3.23	2.23	2.23	6.55	11.69	7.32	15.46	15.24	15.03	57.3	57.3	57.3	57.3	57.3	57.3	57.3	57.3	57.3	57.3	57.3	57.3	57.3	57.3	57.3	57.3	57.3	57.3	0.96	0.9	0.97	0.98	0.97	0.98	0.99	1
103	ISF of Uridine diphosphate glucuronic acid C15H22N2O18P2	MS1	-	402.993	55.86							2.93	2.42			4.93	4.78	13.94	12.9	15.6	31.63	28.66	33.99							55.9	55.9			55.9	55.9	56.2	55.1	56.2	56.2	56.2	56.2							0.67	0.93
103	ISF of Uridine diphosphate glucuronic acid C15H22N2O18P2	MS2	-	158.927	55.86							0.26	1.1			0.74	2.1	3.03	2.33	3.12	5.55	7.16	6.33							55.9	55.9			55.9	55.9	56.2	55.1	56.2	56.2	56.2	56.2							0.67	0.93
103	ISF of Uridine diphosphate glucuronic acid C15H22N2O18P2	MS2	-	403	55.86							0	0.98			0	1.89	5.65	2.59	3	8.66	11.21	15.31							55.9	55.9			55.9	55.9	56.2	55.1	56.2	56.2	56.2	56.2							0.67	0.93
103	ISF of Uridine diphosphate glucuronic acid C15H22N2O18P2	MS2	-	384.985	55.86							0	0.41			0	0	0.96	0	0.27	1.77	1.84	0							55.9	55.9			55.9	55.9	56.2	55.1	56.2	56.2	56.2	56.2							0.67	0.93
103	ISF of Uridine diphosphate glucuronic acid C15H22N2O18P2	MS2	-	290.965	55.86							0	0			0	0	0	0	0.24	0	0.59	0							55.9	55.9			55.9	55.9	56.2	55.1	56.2	56.2	56.2	56.2							0.67	0.93
103	ISF of Uridine diphosphate glucuronic acid C15H22N2O18P2	MS2	-	78.9584	55.86							0.8	0.77			1.54	1.3	3.99	1.86	3.03	7.31	5.47	6.54							55.9	55.9			55.9	55.9	56.2	55.1	56.2	56.2	56.2	56.2							0.67	0.93
103	ISF of Uridine diphosphate glucuronic acid C15H22N2O18P2	MS2	-	111.02	55.86							2.23	1.43			1.54	1.43	1.76	0	2.64	2.83	4.51	3.52							55.9	55.9			55.9	55.9	56.2	55.1	56.2	56.2	56.2	56.2							0.67	0.93
103	Uridine diphosphate glucuronic acid C15H22N2O18P2	MS1	M-H	579.026	54.45	5.62	6	4.9	16.28	13.84	14.39	32.73	31.65	31.26	63.29	63.29	59.39	154.06	159.97	156.16	303.88	303.23	320.27	55.1	55.1	54.5	55.1	55.1	55.1	55.1	55.1	55.1	55.1	55.1	55.1	55.1	55.1	55.1	55.1	55.1	55.1	0.89	0.94	0.94	0.94	0.94	0.98	0.95	0.95
103	Uridine diphosphate glucuronic acid C15H22N2O18P2	MS2	M-H	402.995	54.45	6.77	6.29	5.03	10.76	6.78	12.36	19.03	21.07	23.21	46.38	41.38	48.28	119.92	103.49	111.07	228.97	218.93	204.47	55.1	55.1	54.5	55.1	55.1	55.1	55.1	55.1	55.1	55.1	55.1	55.1	55.1	55.1	55.1	55.1	55.1	55.1	0.89	0.94	0.94	0.94	0.94	0.98	0.95	0.95
103	Uridine diphosphate glucuronic acid C15H22N2O18P2	MS2	M-H	579.027	54.45	1.43	4.04	3.51	10.83	12.81	18.98	29.75	18.92	23.68	59.16	42.93	52.49	125.92	135.2	151.85	263.69	237.76	274.45	55.1	55.1	54.5	55.1	55.1	55.1	55.1	55.1	55.1	55.1	55.1	55.1	55.1	55.1	55.1	55.1	55.1	55.1	0.89	0.94	0.94	0.94	0.94	0.98	0.95	0.95
103	Uridine diphosphate glucuronic acid C15H22N2O18P2	MS2	M-H	323.029	54.45	9.13	5.83	7.83	20.56	19.29	20.9	39.17	40.03	40.32	87.38	79.49	79.01	204.13	204.2	181.49	373.6	370.75	346.84	55.1	55.1	54.5	55.1	55.1	55.1	55.1	55.1	55.1	55.1	55.1	55.1	55.1	55.1	55.1	55.1	55.1	55.1	0.89	0.94	0.94	0.94	0.94	0.98	0.95	0.95
103	Uridine diphosphate glucuronic acid C15H22N2O18P2	MS2	M-H	254.991	54.45	0	0.89	0.17	2.95	1.93	2.61	4.39	5.45	2.34	9.3	8.18	9.35	17.32	20.4	20.2	43.64	41.55	36.79	55.1	55.1	54.5	55.1	55.1	55.1	55.1	55.1	55.1	55.1	55.1	55.1	55.1	55.1	55.1	55.1	55.1	55.1	0.89	0.94	0.94	0.94	0.94	0.98	0.95	0.95
103	Uridine diphosphate glucuronic acid C15H22N2O18P2	MS2	M-H	384.984	54.45	0.68	2.87	1.98	3	5.04	3.68	6.02	10.08	5.4	14.31	15.23	15.15	35.03	34.39	30.44	57.17	56.29	52.76	55.1	55.1	54.5	55.1	55.1	55.1	55.1	55.1	55.1	55.1	55.1	55.1	55.1	55.1	55.1	55.1	55.1	55.1	0.89	0.94	0.94	0.94	0.94	0.98	0.95	0.95
103	Uridine diphosphate glucuronic acid C15H22N2O18P2	MS2	M-H	158.925	54.45	0	0	0.35	0.96	0.79	1.8	3.55	2.28	2.64	3.86	5.17	4.74	13.14	11.46	10.38	15.32	15.77	18.76	55.1	55.1	54.5	55.1	55.1	55.1	55.1	55.1	55.1	55.1	55.1	55.1	55.1	55.1	55.1	55.1	55.1	55.1	0.89	0.94	0.94	0.94	0.94	0.98	0.95	0.95
104	Uridine-5-diphosphoacetylgalactosamine C17H27N3O17P2---Uridine-5-diphosphoacetylglucosamine C17H27N3O17P2	MS1	M-H	606.073	57.28	4.91	4.44	3.85	13.23	13.29	10.18	23.26	24.92	23.28	49.06	48.43	47.12	112.17	113.43	112.69	213.09	213.16	218.89	57.3	57.3	57.3	57.3	57.3	57.3	57.3	57.3	57.3	57.3	57.3	57.3	58.4	57.3	57.3	58.4	58.4	57.3	0.96	0.96	0.86	0.95	0.98	0.98	0.99	0.97
104	Uridine-5-diphosphoacetylgalactosamine C17H27N3O17P2---Uridine-5-diphosphoacetylglucosamine C17H27N3O17P2	MS2	M-H	606.074	57.28	7.1	5.43	2.79	17.13	26.02	21.06	40.69	40.94	42.68	96.05	90.35	73.68	215.94	206.49	199.42	369.24	380.61	373.72	57.3	57.3	57.3	57.3	57.3	57.3	57.3	57.3	57.3	57.3	57.3	57.3	58.4	57.3	57.3	58.4	58.4	57.3	0.96	0.96	0.86	0.95	0.98	0.98	0.99	0.97
104	Uridine-5-diphosphoacetylgalactosamine C17H27N3O17P2---Uridine-5-diphosphoacetylglucosamine C17H27N3O17P2	MS2	M-H	384.984	57.28	1.77	2.86	1.91	2.32	5.34	4.65	8.11	7.58	9.91	17.05	18.3	18.18	44.38	38.86	45.49	78.28	76.46	76.63	57.3	57.3	57.3	57.3	57.3	57.3	57.3	57.3	57.3	57.3	57.3	57.3	58.4	57.3	57.3	58.4	58.4	57.3	0.96	0.96	0.86	0.95	0.98	0.98	0.99	0.97
104	Uridine-5-diphosphoacetylgalactosamine C17H27N3O17P2---Uridine-5-diphosphoacetylglucosamine C17H27N3O17P2	MS2	M-H	282.037	57.28	0.47	0.58	0.35	0	1.52	0.41	4.04	4.86	4.26	6.31	7.6	5.79	14.13	9.3	11.05	22.65	22.84	21.92	57.3	57.3	57.3	57.3	57.3	57.3	57.3	57.3	57.3	57.3	57.3	57.3	58.4	57.3	57.3	58.4	58.4	57.3	0.96	0.96	0.86	0.95	0.98	0.98	0.99	0.97
104	Uridine-5-diphosphoacetylgalactosamine C17H27N3O17P2---Uridine-5-diphosphoacetylglucosamine C17H27N3O17P2	MS2	M-H	362	57.28	0.92	0	0	0	1.39	0.66	3.12	1.92	1.66	6.96	5.88	4.7	13.91	15.44	10.13	23.68	24.1	24.5	57.3	57.3	57.3	57.3	57.3	57.3	57.3	57.3	57.3	57.3	57.3	57.3	58.4	57.3	57.3	58.4	58.4	57.3	0.96	0.96	0.86	0.95	0.98	0.98	0.99	0.97
104	Uridine-5-diphosphoacetylgalactosamine C17H27N3O17P2---Uridine-5-diphosphoacetylglucosamine C17H27N3O17P2	MS2	M-H	272.958	57.28	0	0.23	0.34	0.11	1.03	0.34	3.11	2.41	1.9	4.71	4.72	4.15	9.75	10.03	9.44	16.46	15.02	18.64	57.3	57.3	57.3	57.3	57.3	57.3	57.3	57.3	57.3	57.3	57.3	57.3	58.4	57.3	57.3	58.4	58.4	57.3	0.96	0.96	0.86	0.95	0.98	0.98	0.99	0.97
104	Uridine-5-diphosphoacetylgalactosamine C17H27N3O17P2---Uridine-5-diphosphoacetylglucosamine C17H27N3O17P2	MS2	M-H	402.996	57.28	0	0	0	0.56	1.05	3.08	4.47	7.89	3.64	9.71	7.82	8.73	20.32	22.43	18.45	38.07	36.59	37.92	57.3	57.3	57.3	57.3	57.3	57.3	57.3	57.3	57.3	57.3	57.3	57.3	58.4	57.3	57.3	58.4	58.4	57.3	0.96	0.96	0.86	0.95	0.98	0.98	0.99	0.97
105	3,3',5'-Triiodo-L-thyronine [M-H]- C15H12I3NO4 NIST 1160542---3,3',5'-Triiodo-L-thyronine [M-H]- C15H12I3NO4 NIST 1160546	MS1	M-H	649.782	598.86					4.28			5.13		9.3	9.89	12.62	23.68	22.44	23.72	44.05	42.83	44.25					597.4			598.5		598.5	598.5	598.5	598.5	598.5	598.5	598.5	598.5	598.5					0.78			0.91
105	3,3',5'-Triiodo-L-thyronine [M-H]- C15H12I3NO4 NIST 1160542---3,3',5'-Triiodo-L-thyronine [M-H]- C15H12I3NO4 NIST 1160546	MS2	M-H	649.784	598.86					0.71			2.13		2.57	5.25	2.04	7.36	11.5	8.86	23.35	21.75	12.07					597.4			598.5		598.5	598.5	598.5	598.5	598.5	598.5	598.5	598.5	598.5					0.78			0.91
105	3,3',5'-Triiodo-L-thyronine [M-H]- C15H12I3NO4 NIST 1160542---3,3',5'-Triiodo-L-thyronine [M-H]- C15H12I3NO4 NIST 1160546	MS2	M-H	126.904	598.86					1.14			0.94		1.92	2.04	1.81	4.08	3.26	4.2	9.89	8.62	9.45					597.4			598.5		598.5	598.5	598.5	598.5	598.5	598.5	598.5	598.5	598.5					0.78			0.91
105	3,3',5'-Triiodo-L-thyronine [M-H]- C15H12I3NO4 NIST 1160542---3,3',5'-Triiodo-L-thyronine [M-H]- C15H12I3NO4 NIST 1160546	MS2	M-H	632.756	598.86					0			0.79		1.57	2.2	0.87	4.11	3.08	3.6	9.26	5.08	0					597.4			598.5		598.5	598.5	598.5	598.5	598.5	598.5	598.5	598.5	598.5					0.78			0.91
105	3,3',5'-Triiodo-L-thyronine [M-H]- C15H12I3NO4 NIST 1160542---3,3',5'-Triiodo-L-thyronine [M-H]- C15H12I3NO4 NIST 1160546	MS2	M-H	505.849	598.86					0			0		0.47	0	0	0	0	0	2.34	1.25	0.78					597.4			598.5		598.5	598.5	598.5	598.5	598.5	598.5	598.5	598.5	598.5					0.78			0.91
105	3,3',5'-Triiodo-L-thyronine [M-H]- C15H12I3NO4 NIST 1160542---3,3',5'-Triiodo-L-thyronine [M-H]- C15H12I3NO4 NIST 1160546	MS2	M-H	448.849	598.86					0.74			0		0	0	0	0.44	1.78	0	3.17	2.36	1.32					597.4			598.5		598.5	598.5	598.5	598.5	598.5	598.5	598.5	598.5	598.5					0.78			0.91
105	3,3',5'-Triiodo-L-thyronine [M-H]- C15H12I3NO4 NIST 1160542---3,3',5'-Triiodo-L-thyronine [M-H]- C15H12I3NO4 NIST 1160546	MS2	M-H	522.876	598.86					0			0		0	0	0	0	0	0	0.71	0.32	0.87					597.4			598.5		598.5	598.5	598.5	598.5	598.5	598.5	598.5	598.5	598.5					0.78			0.91
106	.beta.-Nicotinamide adenine dinucleotide [M-H]- C21H27N7O14P2 NIST 1179489	MS1	M-H	662.101	113.5	6.71	6.46	6.26	19.33	19.38	21.11	41.39	43.28	40.87	85.35	88.65	85.69	221.39	228.53	216.85	430.97	431.66	435.86	113.4	113.4	113.5	113.4	112.3	113.4	113.4	113.4	111.2	113.4	113.4	113.4	113.4	112.3	113.4	112.3	113.4	112.3	0.94	0.96	0.95	0.99	1	0.99	1	1
106	.beta.-Nicotinamide adenine dinucleotide [M-H]- C21H27N7O14P2 NIST 1179489	MS2	M-H	540.054	113.5	25.75	16.81	25.13	62.97	62.1	59.04	113.83	128.81	131.32	247.04	270.52	286.75	694.61	674.17	649.94	1361.27	1353.85	1385.91	113.4	113.4	113.5	113.4	112.3	113.4	113.4	113.4	111.2	113.4	113.4	113.4	113.4	112.3	113.4	112.3	113.4	112.3	0.94	0.96	0.95	0.99	1	0.99	1	1
106	.beta.-Nicotinamide adenine dinucleotide [M-H]- C21H27N7O14P2 NIST 1179489	MS2	M-H	426.023	113.5	3.58	0.29	0.65	4.45	3.74	3.66	9.5	10.12	11.98	22.31	23.71	21.62	56.65	47.48	49.02	101.06	88.43	95.32	113.4	113.4	113.5	113.4	112.3	113.4	113.4	113.4	111.2	113.4	113.4	113.4	113.4	112.3	113.4	112.3	113.4	112.3	0.94	0.96	0.95	0.99	1	0.99	1	1
106	.beta.-Nicotinamide adenine dinucleotide [M-H]- C21H27N7O14P2 NIST 1179489	MS2	M-H	408.012	113.5	0.98	2.18	1.34	5.92	2.53	3.39	9.58	9.66	10.95	18.76	16.25	17.93	51.59	46.95	40.88	82.25	76.76	84.24	113.4	113.4	113.5	113.4	112.3	113.4	113.4	113.4	111.2	113.4	113.4	113.4	113.4	112.3	113.4	112.3	113.4	112.3	0.94	0.96	0.95	0.99	1	0.99	1	1
106	.beta.-Nicotinamide adenine dinucleotide [M-H]- C21H27N7O14P2 NIST 1179489	MS2	M-H	328.046	113.5	0	3.35	0.63	2.53	3.22	3.59	10.55	6.87	9.78	14.01	14.35	17.59	34.35	34.11	35.77	69.31	68.14	59.91	113.4	113.4	113.5	113.4	112.3	113.4	113.4	113.4	111.2	113.4	113.4	113.4	113.4	112.3	113.4	112.3	113.4	112.3	0.94	0.96	0.95	0.99	1	0.99	1	1
106	.beta.-Nicotinamide adenine dinucleotide [M-H]- C21H27N7O14P2 NIST 1179489	MS2	M-H	272.959	113.5	0.92	0.57	0	3.1	2.65	2.42	7.06	10.2	9.38	16.22	14.99	12.64	37.56	42.89	32.4	73.36	74.3	73.91	113.4	113.4	113.5	113.4	112.3	113.4	113.4	113.4	111.2	113.4	113.4	113.4	113.4	112.3	113.4	112.3	113.4	112.3	0.94	0.96	0.95	0.99	1	0.99	1	1
106	.beta.-Nicotinamide adenine dinucleotide [M-H]- C21H27N7O14P2 NIST 1179489	MS2	M-H	346.056	113.5	0	1.42	1.03	2.73	1.36	2.47	5.83	3.56	5.83	11.53	12.57	12.89	31.49	28.17	29.14	51.89	51.08	53.89	113.4	113.4	113.5	113.4	112.3	113.4	113.4	113.4	111.2	113.4	113.4	113.4	113.4	112.3	113.4	112.3	113.4	112.3	0.94	0.96	0.95	0.99	1	0.99	1	1
106	ISF of .beta.-Nicotinamide adenine dinucleotide [M-H]- C21H27N7O14P2 NIST 1179489	MS1	-	540.052	113.03		3.4		8	12.27		23.76	22.85	22.65	41.94	43.79	46.75	124.98	123.14	118.11	239.58	245.67	245.68		113		113.4	112.3		113.4	113.4	111.2	113.4	113.4	113.4	113.4	112.3	113.4	112.3	112.3	112.3		0.76		0.85	0.81		0.99	0.98
106	ISF of .beta.-Nicotinamide adenine dinucleotide [M-H]- C21H27N7O14P2 NIST 1179489	MS2	-	540.054	113.03		1.77		4.04	4.78		14.55	13.43	13.42	35.17	21.61	20.74	51.38	60.56	57.1	112.83	142.09	123.7		113		113.4	112.3		113.4	113.4	111.2	113.4	113.4	113.4	113.4	112.3	113.4	112.3	112.3	112.3		0.76		0.85	0.81		0.99	0.98
106	ISF of .beta.-Nicotinamide adenine dinucleotide [M-H]- C21H27N7O14P2 NIST 1179489	MS2	-	272.957	113.03		0		0.8	0		5.01	3	5.35	7.66	4.72	5.18	14.58	14.3	16.56	30.63	28.76	23.81		113		113.4	112.3		113.4	113.4	111.2	113.4	113.4	113.4	113.4	112.3	113.4	112.3	112.3	112.3		0.76		0.85	0.81		0.99	0.98
106	ISF of .beta.-Nicotinamide adenine dinucleotide [M-H]- C21H27N7O14P2 NIST 1179489	MS2	-	408.015	113.03		0		0	0.35		2.54	1.9	2.11	4.3	4.35	5.83	5.63	12.02	12.87	26.65	26.13	18.91		113		113.4	112.3		113.4	113.4	111.2	113.4	113.4	113.4	113.4	112.3	113.4	112.3	112.3	112.3		0.76		0.85	0.81		0.99	0.98
106	ISF of .beta.-Nicotinamide adenine dinucleotide [M-H]- C21H27N7O14P2 NIST 1179489	MS2	-	328.045	113.03		0.57		0.88	1.51		4.03	2.71	3.85	4.68	2.4	3.35	12.66	11.62	12.11	27.18	22.09	19.02		113		113.4	112.3		113.4	113.4	111.2	113.4	113.4	113.4	113.4	112.3	113.4	112.3	112.3	112.3		0.76		0.85	0.81		0.99	0.98
106	ISF of .beta.-Nicotinamide adenine dinucleotide [M-H]- C21H27N7O14P2 NIST 1179489	MS2	-	426.017	113.03		0		1	0		2.44	1.43	1.58	3.3	0.57	3.32	6.75	10.84	12.29	15.16	22.72	19.46		113		113.4	112.3		113.4	113.4	111.2	113.4	113.4	113.4	113.4	112.3	113.4	112.3	112.3	112.3		0.76		0.85	0.81		0.99	0.98
106	ISF of .beta.-Nicotinamide adenine dinucleotide [M-H]- C21H27N7O14P2 NIST 1179489	MS2	-	158.927	113.03		0.61		0.61	0		0.92	0.52	0.97	1.45	3.12	1.72	5.55	4.39	7.6	12.14	10.74	8.65		113		113.4	112.3		113.4	113.4	111.2	113.4	113.4	113.4	113.4	112.3	113.4	112.3	112.3	112.3		0.76		0.85	0.81		0.99	0.98
107	L-Thyroxine C15H11I4NO4---Thyroxine - CASMI2016 Category 1 - Challenge 17 C15H11I4NO4	MS1	M-H	775.679	634.11															8.18	19.29	19.18	19.16															633.7	634.8	633.7	634.8
107	L-Thyroxine C15H11I4NO4---Thyroxine - CASMI2016 Category 1 - Challenge 17 C15H11I4NO4	MS2	M-H	775.683	634.11															3.98	11.22	8.89	1.84															633.7	634.8	633.7	634.8
107	L-Thyroxine C15H11I4NO4---Thyroxine - CASMI2016 Category 1 - Challenge 17 C15H11I4NO4	MS2	M-H	126.905	634.11															1.88	3.89	3.09	1.96															633.7	634.8	633.7	634.8
107	L-Thyroxine C15H11I4NO4---Thyroxine - CASMI2016 Category 1 - Challenge 17 C15H11I4NO4	MS2	M-H	604.784	634.11															0.34	2.39	5.38	0															633.7	634.8	633.7	634.8
107	L-Thyroxine C15H11I4NO4---Thyroxine - CASMI2016 Category 1 - Challenge 17 C15H11I4NO4	MS2	M-H	574.75	634.11															0.5	0.5	1	0															633.7	634.8	633.7	634.8
107	L-Thyroxine C15H11I4NO4---Thyroxine - CASMI2016 Category 1 - Challenge 17 C15H11I4NO4	MS2	M-H	758.653	634.11															1.15	1.34	0	1.72															633.7	634.8	633.7	634.8
107	L-Thyroxine C15H11I4NO4---Thyroxine - CASMI2016 Category 1 - Challenge 17 C15H11I4NO4	MS2	M-H	603.781	634.11															0	1.54	0	0.51															633.7	634.8	633.7	634.8
[truncated: 30 more columns]

## Sheet: MetaboKit-Positive
group	compound	Quantification Mode	adduct	mass	RT(library)	Mix-10ng-ml_r1	Mix-10ng-ml_r2	Mix-10ng-ml_r3	Mix-25ng-ml_r1	Mix-25ng-ml_r2	Mix-25ng-ml_r3	Mix-50ng-ml_r1	Mix-50ng-ml_r2	Mix-50ng-ml_r3	Mix-100ng-ml_r1	Mix-100ng-ml_r2	Mix-100ng-ml_r3	Mix-250ng-ml_r1	Mix-250ng-ml_r2	Mix-250ng-ml_r3	Mix-500ng-ml_r1	Mix-500ng-ml_r2	Mix-500ng-ml_r3	RT_Mix-10ng-ml_r1	RT_Mix-10ng-ml_r2	RT_Mix-10ng-ml_r3	RT_Mix-25ng-ml_r1	RT_Mix-25ng-ml_r2	RT_Mix-25ng-ml_r3	RT_Mix-50ng-ml_r1	RT_Mix-50ng-ml_r2	RT_Mix-50ng-ml_r3	RT_Mix-100ng-ml_r1	RT_Mix-100ng-ml_r2	RT_Mix-100ng-ml_r3	RT_Mix-250ng-ml_r1	RT_Mix-250ng-ml_r2	RT_Mix-250ng-ml_r3	RT_Mix-500ng-ml_r1	RT_Mix-500ng-ml_r2	RT_Mix-500ng-ml_r3	DOTP_Mix-10ng-ml_r1	DOTP_Mix-10ng-ml_r2	DOTP_Mix-10ng-ml_r3	DOTP_Mix-25ng-ml_r1	DOTP_Mix-25ng-ml_r2	DOTP_Mix-25ng-ml_r3	DOTP_Mix-50ng-ml_r1	DOTP_Mix-50ng-ml_r2
1	Vanylglycol [M+H-H2O]+ C9H12O4 NIST 1060927	MS1	M+2H	93.0437	63.4	7.46	5.84	7.43	7.59	6.84	7.61	8.64	9	8.43	9.01	8.92	9.39	10.25	12.9	12.92	13.35	12.76	13.76	63.4	63.4	63.4	63.4	63.4	63.4	63.4	63.4	63.4	61.7	62.8	63.4	62.8	62.8	62.8	62.8	62.8	62.8	0.97	0.98	1	0.99	0.98	0.99	0.97	0.99
1	Vanylglycol [M+H-H2O]+ C9H12O4 NIST 1060927	MS2	M+2H	77.0423	63.4	35.69	34.32	37.61	35.61	35.89	34.69	37.77	35.42	35.45	23.66	20.8	34.79	20.74	21	23.74	19.81	19	23.78	63.4	63.4	63.4	63.4	63.4	63.4	63.4	63.4	63.4	61.7	62.8	63.4	62.8	62.8	62.8	62.8	62.8	62.8	0.97	0.98	1	0.99	0.98	0.99	0.97	0.99
1	Vanylglycol [M+H-H2O]+ C9H12O4 NIST 1060927	MS2	M+2H	91.059	63.4	19.91	22.02	22.3	22.1	21.47	21.81	22.49	20.86	21.24	15.05	11.84	26.12	13.75	11.02	13.7	12.31	10.79	12.92	63.4	63.4	63.4	63.4	63.4	63.4	63.4	63.4	63.4	61.7	62.8	63.4	62.8	62.8	62.8	62.8	62.8	62.8	0.97	0.98	1	0.99	0.98	0.99	0.97	0.99
1	Vanylglycol [M+H-H2O]+ C9H12O4 NIST 1060927	MS2	M+2H	51.023	63.4	19.67	20.06	20.57	22.39	21.05	19.21	19.66	20.71	19.89	15.34	10.82	20.06	10.48	14.82	13.46	10.84	13.19	11.45	63.4	63.4	63.4	63.4	63.4	63.4	63.4	63.4	63.4	61.7	62.8	63.4	62.8	62.8	62.8	62.8	62.8	62.8	0.97	0.98	1	0.99	0.98	0.99	0.97	0.99
1	Vanylglycol [M+H-H2O]+ C9H12O4 NIST 1060927	MS2	M+2H	43.0316	63.4	1.82	2.42	2.28	1.94	3.26	2.05	2.12	2.07	2.51	2.14	1.98	4.06	1.96	2.37	2.8	4.08	4.05	3.93	63.4	63.4	63.4	63.4	63.4	63.4	63.4	63.4	63.4	61.7	62.8	63.4	62.8	62.8	62.8	62.8	62.8	62.8	0.97	0.98	1	0.99	0.98	0.99	0.97	0.99
1	Vanylglycol [M+H-H2O]+ C9H12O4 NIST 1060927	MS2	M+2H	50.017	63.4	2.14	3.52	1.85	1.99	3.15	2.62	2.9	4.09	3.09	2.88	1.3	2.99	1.51	2.42	2.64	2.99	0	2.26	63.4	63.4	63.4	63.4	63.4	63.4	63.4	63.4	63.4	61.7	62.8	63.4	62.8	62.8	62.8	62.8	62.8	62.8	0.97	0.98	1	0.99	0.98	0.99	0.97	0.99
1	Vanylglycol [M+H-H2O]+ C9H12O4 NIST 1060927	MS2	M+2H	93.0707	63.4	0	2.48	2.31	1.88	3.62	2.45	0	1.68	1.07	0.77	1.54	1.51	0	0.94	0.6	0.94	0.97	0	63.4	63.4	63.4	63.4	63.4	63.4	63.4	63.4	63.4	61.7	62.8	63.4	62.8	62.8	62.8	62.8	62.8	62.8	0.97	0.98	1	0.99	0.98	0.99	0.97	0.99
2	Cyclohexylamine [M+H]+ C6H13N NIST 1065492	MS1	M+H	100.111	232.7	1.84			3.21	3.5	2.49	6.99	6.35	6.8	12.55	12.07	13.91	35.22	33.47	32.2	63.84	64.97	62.11	232.7			232.7	232.7	232.7	232.2	232.7	233.3	233.3	233.3	233.3	233.3	233.3	233.3	232.2	233.3	232.2	0.86			0.85	0.88	0.87	0.89	0.87
2	Cyclohexylamine [M+H]+ C6H13N NIST 1065492	MS2	M+H	55.0543	232.7	53.02			50.81	52.72	56.13	31.87	57.87	34.76	48.32	46.4	45.36	86.46	83.2	84.44	143.78	121.86	125.96	232.7			232.7	232.7	232.7	232.2	232.7	233.3	233.3	233.3	233.3	233.3	233.3	233.3	232.2	233.3	232.2	0.86			0.85	0.88	0.87	0.89	0.87
2	Cyclohexylamine [M+H]+ C6H13N NIST 1065492	MS2	M+H	83.0854	232.7	3.68			3.1	6.12	7.05	6.19	4.22	5.17	9.6	6.72	10.41	18.75	16.62	16.54	36.92	27.48	32.88	232.7			232.7	232.7	232.7	232.2	232.7	233.3	233.3	233.3	233.3	233.3	233.3	233.3	232.2	233.3	232.2	0.86			0.85	0.88	0.87	0.89	0.87
2	Cyclohexylamine [M+H]+ C6H13N NIST 1065492	MS2	M+H	41.0386	232.7	85.96			88.46	84.3	87.33	51.84	89.67	56.08	51.28	48.67	60.37	64.12	67.92	64.47	74.95	73.33	68.69	232.7			232.7	232.7	232.7	232.2	232.7	233.3	233.3	233.3	233.3	233.3	233.3	233.3	232.2	233.3	232.2	0.86			0.85	0.88	0.87	0.89	0.87
2	Cyclohexylamine [M+H]+ C6H13N NIST 1065492	MS2	M+H	100.111	232.7	0.28			0	0.14	0.07	0.69	0	0.42	0.91	0.45	1.15	3.2	3.55	4.47	7.43	5.9	6.31	232.7			232.7	232.7	232.7	232.2	232.7	233.3	233.3	233.3	233.3	233.3	233.3	233.3	232.2	233.3	232.2	0.86			0.85	0.88	0.87	0.89	0.87
2	Cyclohexylamine [M+H]+ C6H13N NIST 1065492	MS2	M+H	53.0388	232.7	9.05			8.72	8	8.47	4.29	8.64	4.2	6.6	4.47	6.27	6.8	8.48	6.84	8.55	11.54	8.33	232.7			232.7	232.7	232.7	232.2	232.7	233.3	233.3	233.3	233.3	233.3	233.3	233.3	232.2	233.3	232.2	0.86			0.85	0.88	0.87	0.89	0.87
2	Cyclohexylamine [M+H]+ C6H13N NIST 1065492	MS2	M+H	100.076	232.7	7.93			4.62	8.22	9.23	5.23	6.79	5.75	0	7.22	6.99	8.18	8	8.29	7.39	6.23	7.14	232.7			232.7	232.7	232.7	232.2	232.7	233.3	233.3	233.3	233.3	233.3	233.3	233.3	232.2	233.3	232.2	0.86			0.85	0.88	0.87	0.89	0.87
3	Choline cation [Cat]+ C5H14NO NIST 1067855---Choline cation [Cat]+ C5H14NO NIST 1067856	MS1	M	104.106	62.03	20.59	20.25	20.22	50.93	50.88	53.06	107.02	110.13	102.28	199	179.97	199.98	439.76	428.93	441.79	844.95	852.49	885.77	61.7	61.7	61.7	61.7	61.7	61.7	61.7	61.7	61.7	61.7	61.7	61.7	61.7	61.7	61.7	61.7	61.7	61.7	0.99	0.97	0.98	0.99	1	0.99	0.99	1
3	Choline cation [Cat]+ C5H14NO NIST 1067855---Choline cation [Cat]+ C5H14NO NIST 1067856	MS2	M	104.107	62.03	11.54	9.66	10.37	38.18	30.83	26.12	62.68	53.3	72.15	92.73	149.46	103.05	320	341.87	356.63	470.33	573.31	557.88	61.7	61.7	61.7	61.7	61.7	61.7	61.7	61.7	61.7	61.7	61.7	61.7	61.7	61.7	61.7	61.7	61.7	61.7	0.99	0.97	0.98	0.99	1	0.99	0.99	1
3	Choline cation [Cat]+ C5H14NO NIST 1067855---Choline cation [Cat]+ C5H14NO NIST 1067856	MS2	M	60.0809	62.03	4.97	4.73	5.6	14.67	18.63	15.18	36.48	31.44	27.99	54.61	59.36	61.1	158.97	172.4	191.08	312.2	308.64	313.43	61.7	61.7	61.7	61.7	61.7	61.7	61.7	61.7	61.7	61.7	61.7	61.7	61.7	61.7	61.7	61.7	61.7	61.7	0.99	0.97	0.98	0.99	1	0.99	0.99	1
3	Choline cation [Cat]+ C5H14NO NIST 1067855---Choline cation [Cat]+ C5H14NO NIST 1067856	MS2	M	58.0651	62.03	7.96	8.48	6.96	11.03	13.88	15.81	25.33	24.35	28.43	55.53	44.65	50.51	122.37	113.46	137.39	258.91	213.77	226.63	61.7	61.7	61.7	61.7	61.7	61.7	61.7	61.7	61.7	61.7	61.7	61.7	61.7	61.7	61.7	61.7	61.7	61.7	0.99	0.97	0.98	0.99	1	0.99	0.99	1
3	Choline cation [Cat]+ C5H14NO NIST 1067855---Choline cation [Cat]+ C5H14NO NIST 1067856	MS2	M	45.0338	62.03	12.37	13	12.16	17.86	20.1	18.44	25.86	26.8	29.03	39.51	41.51	47.41	94.1	103.8	114.84	184.98	175.89	179.91	61.7	61.7	61.7	61.7	61.7	61.7	61.7	61.7	61.7	61.7	61.7	61.7	61.7	61.7	61.7	61.7	61.7	61.7	0.99	0.97	0.98	0.99	1	0.99	0.99	1
3	Choline cation [Cat]+ C5H14NO NIST 1067855---Choline cation [Cat]+ C5H14NO NIST 1067856	MS2	M	44.0497	62.03	4.02	4.16	3.33	7.6	10.01	9.42	17.07	17.33	16.33	33.14	29.94	31.71	68.7	68.8	89.03	156.7	135.35	138.86	61.7	61.7	61.7	61.7	61.7	61.7	61.7	61.7	61.7	61.7	61.7	61.7	61.7	61.7	61.7	61.7	61.7	61.7	0.99	0.97	0.98	0.99	1	0.99	0.99	1
3	Choline cation [Cat]+ C5H14NO NIST 1067855---Choline cation [Cat]+ C5H14NO NIST 1067856	MS2	M	45.057	62.03	1.03	1.03	0.77	3.5	2.99	4.42	6.01	5.66	5.84	10.97	12.68	10.61	23.05	24.56	27.91	42.34	47.82	39.43	61.7	61.7	61.7	61.7	61.7	61.7	61.7	61.7	61.7	61.7	61.7	61.7	61.7	61.7	61.7	61.7	61.7	61.7	0.99	0.97	0.98	0.99	1	0.99	0.99	1
4	Histamine C5H9N3	MS1	M+H	112.086	78.61												2	43.79	44.09	42.76	220.35	213.86	218.31												78.6	82.6	82.6	81.5	80.4	79.3	79.3
4	Histamine C5H9N3	MS2	M+H	95.0603	78.61												2.56	149.52	156.93	145.6	783.63	733.98	707.03												78.6	82.6	82.6	81.5	80.4	79.3	79.3
4	Histamine C5H9N3	MS2	M+H	68.0493	78.61												3.11	24.79	30.35	25.39	145.07	141.05	144.96												78.6	82.6	82.6	81.5	80.4	79.3	79.3
4	Histamine C5H9N3	MS2	M+H	41.0387	78.61												96.47	103.83	106.64	75.31	166.66	155.85	158.23												78.6	82.6	82.6	81.5	80.4	79.3	79.3
4	Histamine C5H9N3	MS2	M+H	112.086	78.61												0	12.56	14.28	10.8	53.05	51.91	42.96												78.6	82.6	82.6	81.5	80.4	79.3	79.3
4	Histamine C5H9N3	MS2	M+H	83.0597	78.61												7.24	16.2	14.77	12.38	56.11	53.6	51.71												78.6	82.6	82.6	81.5	80.4	79.3	79.3
4	Histamine C5H9N3	MS2	M+H	82.052	78.61												1.13	7.98	8.36	5.71	22.46	25.41	24.75												78.6	82.6	82.6	81.5	80.4	79.3	79.3
4	ISF of Histamine C5H9N3	MS1	-	95.0595	78.57	5.46	5.24		6.69	7.12	6.88	6.32	5.62	6.74	8.05	8.13	6.71	66.13	66.41	63.26	306.84	291.52	299.03	78.6	78.6		78.6	78.6	78.6	78.6	78.6	78.6	78.6	78.6	78.6	82.6	81.5	81.5	80.4	79.3	79.3	0.67	0.69		0.67	0.68	0.7	0.63	0.59
4	ISF of Histamine C5H9N3	MS2	-	95.0623	78.57	6.53	5.13		4.88	5.7	7.41	5.61	5.58	5.1	7.23	5.86	5.67	15.98	12.89	13.1	53	45.34	51.79	78.6	78.6		78.6	78.6	78.6	78.6	78.6	78.6	78.6	78.6	78.6	82.6	81.5	81.5	80.4	79.3	79.3	0.67	0.69		0.67	0.68	0.7	0.63	0.59
4	ISF of Histamine C5H9N3	MS2	-	68.0508	78.57	0.94	0.92		0.8	1.58	1.26	1.38	1.43	0	1.12	1.35	0	6.66	4.8	6.56	15.02	14.35	16.09	78.6	78.6		78.6	78.6	78.6	78.6	78.6	78.6	78.6	78.6	78.6	82.6	81.5	81.5	80.4	79.3	79.3	0.67	0.69		0.67	0.68	0.7	0.63	0.59
4	ISF of Histamine C5H9N3	MS2	-	41.039	78.57	72.7	69.85		63.52	73.6	68.68	74.16	73.51	69.01	70.04	70.23	67.94	101.79	80.04	55.39	86.07	69.19	65.96	78.6	78.6		78.6	78.6	78.6	78.6	78.6	78.6	78.6	78.6	78.6	82.6	81.5	81.5	80.4	79.3	79.3	0.67	0.69		0.67	0.68	0.7	0.63	0.59
4	ISF of Histamine C5H9N3	MS2	-	60.9883	78.57	64.93	64.59		66.64	64.5	67.03	65.82	66.35	63.5	70.17	65.3	63.44	61.71	55.03	50.96	47.37	47.82	48.54	78.6	78.6		78.6	78.6	78.6	78.6	78.6	78.6	78.6	78.6	78.6	82.6	81.5	81.5	80.4	79.3	79.3	0.67	0.69		0.67	0.68	0.7	0.63	0.59
4	ISF of Histamine C5H9N3	MS2	-	67.0573	78.57	9.48	6.22		7.27	8.14	8.53	7.98	5.62	7.54	6.13	8.33	6.06	8.79	7.44	5.57	6.92	6.15	6.77	78.6	78.6		78.6	78.6	78.6	78.6	78.6	78.6	78.6	78.6	78.6	82.6	81.5	81.5	80.4	79.3	79.3	0.67	0.69		0.67	0.68	0.7	0.63	0.59
4	ISF of Histamine C5H9N3	MS2	-	54.0363	78.57	2.17	2.89		1.97	2.99	3.55	2.75	3.35	3.27	2.89	2.43	2.84	2.32	2.84	3.6	4.41	4.35	4.73	78.6	78.6		78.6	78.6	78.6	78.6	78.6	78.6	78.6	78.6	78.6	82.6	81.5	81.5	80.4	79.3	79.3	0.67	0.69		0.67	0.68	0.7	0.63	0.59
5	Creatinine [M+H]+ C4H7N3O NIST 1061055---Creatinine [M+H]+ C4H7N3O NIST 1061060	MS1	M+H	114.065	68.96	2.38	2.9	2.12	3.61	4.87	4.53	4.82	6.14	4.67	10.89	16.28	8.37	33.59	34.33	34.81	55.71	58.5	59.58	69	69	69	69	69	69	61.7	61.7	61.7	61.7	63.9	61.7	68.3	68.3	68.3	69.4	69.4	69.4	0.82	0.84	0.81	0.83	0.83	0.92	0.94	0.91
5	Creatinine [M+H]+ C4H7N3O NIST 1061055---Creatinine [M+H]+ C4H7N3O NIST 1061060	MS2	M+H	44.0498	68.96	9.81	8.65	7.85	14.27	16.73	16.8	17.07	18.76	16.33	36.94	40.68	34.05	101.05	99.79	118.6	206.4	187.39	193.99	69	69	69	69	69	69	61.7	61.7	61.7	61.7	63.9	61.7	68.3	68.3	68.3	69.4	69.4	69.4	0.82	0.84	0.81	0.83	0.83	0.92	0.94	0.91
5	Creatinine [M+H]+ C4H7N3O NIST 1061055---Creatinine [M+H]+ C4H7N3O NIST 1061060	MS2	M+H	114.093	68.96	38.23	33.53	36.95	38.98	41.34	34.03	11.07	8.91	9.14	19.19	27.56	15.61	58.01	56.91	62.56	61.06	54.17	54.55	69	69	69	69	69	69	61.7	61.7	61.7	61.7	63.9	61.7	68.3	68.3	68.3	69.4	69.4	69.4	0.82	0.84	0.81	0.83	0.83	0.92	0.94	0.91
5	Creatinine [M+H]+ C4H7N3O NIST 1061055---Creatinine [M+H]+ C4H7N3O NIST 1061060	MS2	M+H	114.068	68.96	0	0	0	0	0.7	1.26	0	0	0.07	0	0	0.37	9.02	9.21	8.66	11.06	13.26	15.78	69	69	69	69	69	69	61.7	61.7	61.7	61.7	63.9	61.7	68.3	68.3	68.3	69.4	69.4	69.4	0.82	0.84	0.81	0.83	0.83	0.92	0.94	0.91
5	Creatinine [M+H]+ C4H7N3O NIST 1061055---Creatinine [M+H]+ C4H7N3O NIST 1061060	MS2	M+H	44.0135	68.96	15.1	17.11	13.74	15.73	15.72	15.46	5.53	7.68	5.79	11.92	17.51	10	29.27	28.38	27.87	26.97	29.57	30.74	69	69	69	69	69	69	61.7	61.7	61.7	61.7	63.9	61.7	68.3	68.3	68.3	69.4	69.4	69.4	0.82	0.84	0.81	0.83	0.83	0.92	0.94	0.91
5	Creatinine [M+H]+ C4H7N3O NIST 1061055---Creatinine [M+H]+ C4H7N3O NIST 1061060	MS2	M+H	43.0291	68.96	0	1.39	2.23	2.53	0	2.61	0.85	1.09	0.64	2.36	2.25	2.38	7.36	9.02	8.06	11.35	9.93	13.21	69	69	69	69	69	69	61.7	61.7	61.7	61.7	63.9	61.7	68.3	68.3	68.3	69.4	69.4	69.4	0.82	0.84	0.81	0.83	0.83	0.92	0.94	0.91
5	Creatinine [M+H]+ C4H7N3O NIST 1061055---Creatinine [M+H]+ C4H7N3O NIST 1061060	MS2	M+H	96.0796	68.96	5.83	2.56	4.81	5.87	5.83	2.83	1.91	1.47	1.57	1.8	3.95	2.64	10.47	6.49	7.77	0	7.69	6.96	69	69	69	69	69	69	61.7	61.7	61.7	61.7	63.9	61.7	68.3	68.3	68.3	69.4	69.4	69.4	0.82	0.84	0.81	0.83	0.83	0.92	0.94	0.91
6	.beta.-Cyano-L-alanine [M+H]+ C4H6N2O2 NIST 1058614	MS1	M+H	115.053	495.93	1.39	2.6	2.32	2.66	3.43	2.83	4.72	4.92	4.5	5.97	7.28	6.44	16.72	15.06	15.59	30.32	29.75	31.87	495.9	495.9	495.9	495.9	495.9	495.9	495.9	495.9	495.9	496.2	496.2	495.1	496.2	496.2	496.2	496.2	496.2	496.2	0.68	0.68	0.75	0.77	0.77	0.76	0.75	0.83
6	.beta.-Cyano-L-alanine [M+H]+ C4H6N2O2 NIST 1058614	MS2	M+H	115.057	495.93	0	0	0.74	0.37	0.71	1.15	0.71	1.56	1.86	1.46	0.41	1.23	2.09	4.59	3.37	5.19	5.68	5.02	495.9	495.9	495.9	495.9	495.9	495.9	495.9	495.9	495.9	496.2	496.2	495.1	496.2	496.2	496.2	496.2	496.2	496.2	0.68	0.68	0.75	0.77	0.77	0.76	0.75	0.83
6	.beta.-Cyano-L-alanine [M+H]+ C4H6N2O2 NIST 1058614	MS2	M+H	43.0555	495.93	81.65	84.6	86.68	79.6	76.24	79.54	85.66	81.36	75.23	26.25	23.01	25.73	28.57	29.71	34.46	33.39	33.11	31.56	495.9	495.9	495.9	495.9	495.9	495.9	495.9	495.9	495.9	496.2	496.2	495.1	496.2	496.2	496.2	496.2	496.2	496.2	0.68	0.68	0.75	0.77	0.77	0.76	0.75	0.83
6	.beta.-Cyano-L-alanine [M+H]+ C4H6N2O2 NIST 1058614	MS2	M+H	45.0331	495.93	30.47	34.41	34.88	34.04	31.19	32.81	35.23	28.88	33.16	7.21	9.63	8.81	11.54	11.47	11.63	14.31	14.11	11.13	495.9	495.9	495.9	495.9	495.9	495.9	495.9	495.9	495.9	496.2	496.2	495.1	496.2	496.2	496.2	496.2	496.2	496.2	0.68	0.68	0.75	0.77	0.77	0.76	0.75	0.83
6	.beta.-Cyano-L-alanine [M+H]+ C4H6N2O2 NIST 1058614	MS2	M+H	89.0391	495.93	0	0	0	0.2	0	0	0	0.13	0	0	0.59	0.66	1.28	1.28	1.18	1.77	2.8	1.94	495.9	495.9	495.9	495.9	495.9	495.9	495.9	495.9	495.9	496.2	496.2	495.1	496.2	496.2	496.2	496.2	496.2	496.2	0.68	0.68	0.75	0.77	0.77	0.76	0.75	0.83
6	.beta.-Cyano-L-alanine [M+H]+ C4H6N2O2 NIST 1058614	MS2	M+H	55.0574	495.93	50.94	52.22	49.92	53.72	47.98	49.41	48.95	52.72	52.39	12.32	15.78	14.59	17.03	19.21	18.04	18.53	20.78	17.32	495.9	495.9	495.9	495.9	495.9	495.9	495.9	495.9	495.9	496.2	496.2	495.1	496.2	496.2	496.2	496.2	496.2	496.2	0.68	0.68	0.75	0.77	0.77	0.76	0.75	0.83
6	.beta.-Cyano-L-alanine [M+H]+ C4H6N2O2 NIST 1058614	MS2	M+H	42.0378	495.93	71.37	75.38	83.22	69.32	73.33	74.18	75.11	75.22	81.75	21.25	20.6	20.71	29.69	30	26.68	29.07	28.81	26.28	495.9	495.9	495.9	495.9	495.9	495.9	495.9	495.9	495.9	496.2	496.2	495.1	496.2	496.2	496.2	496.2	496.2	496.2	0.68	0.68	0.75	0.77	0.77	0.76	0.75	0.83
6	Ozagrel [M+H]+ C13H12N2O2 NIST 1105353	MS1	M+2H	115.053	495.68	1.39	2.74	2.43	2.7	3.45	2.89	4.72	5.04	4.53	5.97	7.28	6.44	16.72	15.06	15.59	30.32	29.75	31.87	495.7	495.7	495.7	495.7	495.7	495.7	495.7	495.7	495.7	496.2	496.2	495.1	496.2	496.2	496.2	496.2	496.2	496.2	0.62	0.62	0.7	0.72	0.74	0.71	0.7	0.79
6	Ozagrel [M+H]+ C13H12N2O2 NIST 1105353	MS2	M+2H	115.055	495.68	0	0	0.89	0.45	0.71	1.23	0.71	1.56	2.12	1.46	0.41	1.16	2.09	4.59	3.37	5.19	5.68	5.02	495.7	495.7	495.7	495.7	495.7	495.7	495.7	495.7	495.7	496.2	496.2	495.1	496.2	496.2	496.2	496.2	496.2	496.2	0.62	0.62	0.7	0.72	0.74	0.71	0.7	0.79
6	Ozagrel [M+H]+ C13H12N2O2 NIST 1105353	MS2	M+2H	45.0357	495.68	31.59	35.57	35.91	35.3	32.22	33.59	36.51	29.64	34.58	7.21	9.63	8.81	11.54	11.47	11.63	14.31	14.11	11.13	495.7	495.7	495.7	495.7	495.7	495.7	495.7	495.7	495.7	496.2	496.2	495.1	496.2	496.2	496.2	496.2	496.2	496.2	0.62	0.62	0.7	0.72	0.74	0.71	0.7	0.79
6	Ozagrel [M+H]+ C13H12N2O2 NIST 1105353	MS2	M+2H	89.0395	495.68	0	0	0	0.2	0	0	0	0.13	0	0	0.59	0.66	1.28	1.28	1.18	1.77	2.8	1.94	495.7	495.7	495.7	495.7	495.7	495.7	495.7	495.7	495.7	496.2	496.2	495.1	496.2	496.2	496.2	496.2	496.2	496.2	0.62	0.62	0.7	0.72	0.74	0.71	0.7	0.79
6	Ozagrel [M+H]+ C13H12N2O2 NIST 1105353	MS2	M+2H	55.0552	495.68	53.13	53.67	51.15	55.22	49.46	51.73	50.61	54.06	54.02	12.32	15.78	14.59	17.03	19.21	18.04	18.53	20.78	17.32	495.7	495.7	495.7	495.7	495.7	495.7	495.7	495.7	495.7	496.2	496.2	495.1	496.2	496.2	496.2	496.2	496.2	496.2	0.62	0.62	0.7	0.72	0.74	0.71	0.7	0.79
6	Ozagrel [M+H]+ C13H12N2O2 NIST 1105353	MS2	M+2H	43.056	495.68	84.01	87.67	89.54	82.23	78.51	81.49	89.49	84.21	78.6	26.25	23.01	25.73	28.57	29.71	34.46	33.39	33.11	31.56	495.7	495.7	495.7	495.7	495.7	495.7	495.7	495.7	495.7	496.2	496.2	495.1	496.2	496.2	496.2	496.2	496.2	496.2	0.62	0.62	0.7	0.72	0.74	0.71	0.7	0.79
6	Ozagrel [M+H]+ C13H12N2O2 NIST 1105353	MS2	M+2H	44.0166	495.68	19.95	21.19	20.17	18.11	20.79	19.96	22.51	21.03	20.56	5.77	6.58	6.54	8.87	9.89	7.5	7.87	7.27	8.4	495.7	495.7	495.7	495.7	495.7	495.7	495.7	495.7	495.7	496.2	496.2	495.1	496.2	496.2	496.2	496.2	496.2	496.2	0.62	0.62	0.7	0.72	0.74	0.71	0.7	0.79
7	8-Methylflavone [M+H]+ C16H12O2 NIST 1159401	MS1	M+2H	119.048	92.09	1.9			4.12	3.72	3.94	6.98	8.43	5.92		13.22	13.07	32.22	31.65	29.9	51.98	55.09	53.45	92.1			92.1	92.1	92.1	92.5	92.1	92.5		92.1	92.1	92.1	92.1	92.1	92.1	92.1	92.1	0.86			0.84	0.87	0.89	0.85	0.81
7	8-Methylflavone [M+H]+ C16H12O2 NIST 1159401	MS2	M+2H	91.056	92.09	66.67			66.73	62.13	58.33	23.03	62.03	21.71		64.81	65.14	71.36	65.47	68.32	66.97	61.76	66.3	92.1			92.1	92.1	92.1	92.5	92.1	92.5		92.1	92.1	92.1	92.1	92.1	92.1	92.1	92.1	0.86			0.84	0.87	0.89	0.85	0.81
7	8-Methylflavone [M+H]+ C16H12O2 NIST 1159401	MS2	M+2H	65.04	92.09	16.8			18.71	16.84	17.24	6.98	17.3	8.33		16.49	19.83	19.1	20.91	18.89	21.19	19.12	19.45	92.1			92.1	92.1	92.1	92.5	92.1	92.5		92.1	92.1	92.1	92.1	92.1	92.1	92.1	92.1	0.86			0.84	0.87	0.89	0.85	0.81
7	8-Methylflavone [M+H]+ C16H12O2 NIST 1159401	MS2	M+2H	77.0376	92.09	57.16			55.6	54.82	52.12	21.47	57.96	21.26		52.98	57.26	57.84	57.45	57.33	56.18	64.49	64.26	92.1			92.1	92.1	92.1	92.5	92.1	92.5		92.1	92.1	92.1	92.1	92.1	92.1	92.1	92.1	0.86			0.84	0.87	0.89	0.85	0.81
8	1H-Benzotriazole; LC-ESI-ITFT; MS2; CE C6H5N3	MS1	M+H	120.055	393.75	1.64	1.89	1.93	2.4	2.25	1.85	2.53	2.71	2.77	3.64	3.12		7.16	7.02	6.95	13.76	13.75	13.78	393.8	393.8	393.8	393.8	393.8	393.8	393.8	393.8	393.8	393.8	393.8		393.9	393.9	393.9	393.9	393.9	393.9	0.74	0.55	0.72	0.69	0.65	0.75	0.74	0.85
8	1H-Benzotriazole; LC-ESI-ITFT; MS2; CE C6H5N3	MS2	M+H	120.055	393.75	2.44	0	1.6	3.35	1.56	2.32	2.47	4.2	2.67	4.05	3.05		7.4	6.54	5.57	10.7	9.17	9.65	393.8	393.8	393.8	393.8	393.8	393.8	393.8	393.8	393.8	393.8	393.8		393.9	393.9	393.9	393.9	393.9	393.9	0.74	0.55	0.72	0.69	0.65	0.75	0.74	0.85
8	1H-Benzotriazole; LC-ESI-ITFT; MS2; CE C6H5N3	MS2	M+H	65.0383	393.75	11.91	14.13	12.67	12.35	13.2	13.05	12.17	13.79	13	12.46	13.1		5.64	6.74	6.55	8.39	9.21	7.8	393.8	393.8	393.8	393.8	393.8	393.8	393.8	393.8	393.8	393.8	393.8		393.9	393.9	393.9	393.9	393.9	393.9	0.74	0.55	0.72	0.69	0.65	0.75	0.74	0.85
8	1H-Benzotriazole; LC-ESI-ITFT; MS2; CE C6H5N3	MS2	M+H	92.0499	393.75	4.33	4.27	6.05	5.49	5.44	6.28	5.41	7.61	6.33	8.16	6.17		2.57	2.93	4.94	3.51	3.98	2.31	393.8	393.8	393.8	393.8	393.8	393.8	393.8	393.8	393.8	393.8	393.8		393.9	393.9	393.9	393.9	393.9	393.9	0.74	0.55	0.72	0.69	0.65	0.75	0.74	0.85
8	1H-Benzotriazole; LC-ESI-ITFT; MS2; CE C6H5N3	MS2	M+H	105.07	393.75	20.2	16.98	19.47	19.26	17.33	21.27	22.57	19.13	20.44	18.21	18.56		7.43	5.81	7.41	6.45	5.76	5.11	393.8	393.8	393.8	393.8	393.8	393.8	393.8	393.8	393.8	393.8	393.8		393.9	393.9	393.9	393.9	393.9	393.9	0.74	0.55	0.72	0.69	0.65	0.75	0.74	0.85
8	1H-Benzotriazole; LC-ESI-ITFT; MS2; CE C6H5N3	MS2	M+H	60.9863	393.75	7.93	8	6.12	7.17	7.35	8.51	5.91	4.92	6.56	9.38	8.08		1.99	2.23	2.81	2.98	1.93	1.93	393.8	393.8	393.8	393.8	393.8	393.8	393.8	393.8	393.8	393.8	393.8		393.9	393.9	393.9	393.9	393.9	393.9	0.74	0.55	0.72	0.69	0.65	0.75	0.74	0.85
8	1H-Benzotriazole; LC-ESI-ITFT; MS2; CE C6H5N3	MS2	M+H	77.0386	393.75	28.18	27.13	27.43	25.52	27.62	24.27	27.77	25.11	28.03	29.19	28.63		7.89	8.29	9.86	10.08	7.68	8.25	393.8	393.8	393.8	393.8	393.8	393.8	393.8	393.8	393.8	393.8	393.8		393.9	393.9	393.9	393.9	393.9	393.9	0.74	0.55	0.72	0.69	0.65	0.75	0.74	0.85
9	Purine C5H4N4	MS1	M+H	121.05	134.21	15.41	17.43	16.82	45.08	39.24	47.54	99.88	100.98	101.63	189.15	190.01	177.9	442.59	455.79	450.96	787.8	805.12	792.24	133.2	133.2	133.2	134.3	133.2	134.3	133.2	134.3	133.2	133.2	134.3	129.9	134.3	134.3	133.2	133.2	134.3	133.2	1	0.99	0.98	1	1	1	1	1
9	Purine C5H4N4	MS2	M+H	121.051	134.21	23.73	25.87	24.72	56.31	50.35	44.94	103.1	117.71	110.15	216.53	235.12	207.13	499.47	536.66	507.25	946.76	1004.89	998.11	133.2	133.2	133.2	134.3	133.2	134.3	133.2	134.3	133.2	133.2	134.3	129.9	134.3	134.3	133.2	133.2	134.3	133.2	1	0.99	0.98	1	1	1	1	1
9	Purine C5H4N4	MS2	M+H	94.04	134.21	10.6	9.69	8.21	19.78	19.57	20.7	36.58	45.92	40.05	77.47	86.22	74.4	204.57	213.52	217.21	380.64	383.21	379.99	133.2	133.2	133.2	134.3	133.2	134.3	133.2	134.3	133.2	133.2	134.3	129.9	134.3	134.3	133.2	133.2	134.3	133.2	1	0.99	0.98	1	1	1	1	1
9	Purine C5H4N4	MS2	M+H	67.0291	134.21	2.99	3.68	3.22	7.07	6.99	6.76	15.4	17.19	14.91	25.45	23.43	24.12	86.94	84.64	86.2	142.77	144.82	144.34	133.2	133.2	133.2	134.3	133.2	134.3	133.2	134.3	133.2	133.2	134.3	129.9	134.3	134.3	133.2	133.2	134.3	133.2	1	0.99	0.98	1	1	1	1	1
9	Purine C5H4N4	MS2	M+H	52.0185	134.21	0.28	0.45	1.21	1.36	2.01	0.96	2.43	3.17	2.31	6.39	5.18	3.54	12.71	11.71	12.71	21.9	18.14	17.16	133.2	133.2	133.2	134.3	133.2	134.3	133.2	134.3	133.2	133.2	134.3	129.9	134.3	134.3	133.2	133.2	134.3	133.2	1	0.99	0.98	1	1	1	1	1
9	Purine C5H4N4	MS2	M+H	40.0185	134.21	0.88	0.53	0	1.03	1.14	1.52	2.14	2.6	3.81	3.15	2.82	3.63	8.93	8.47	9.75	14.51	14.61	17.47	133.2	133.2	133.2	134.3	133.2	134.3	133.2	134.3	133.2	133.2	134.3	129.9	134.3	134.3	133.2	133.2	134.3	133.2	1	0.99	0.98	1	1	1	1	1
9	Purine C5H4N4	MS2	M+H	43.0292	134.21	0.61	0.61	2	0.75	1.05	1.46	1.34	1.68	2.03	2.48	2.77	1.86	4.91	7.72	3.87	8.05	7.11	6.38	133.2	133.2	133.2	134.3	133.2	134.3	133.2	134.3	133.2	133.2	134.3	129.9	134.3	134.3	133.2	133.2	134.3	133.2	1	0.99	0.98	1	1	1	1	1
10	Isonicotinamide [M+H]+ C6H6N2O NIST 1192306---Niacinamide; LC-ESI-QTOF; MS2; CE C6H6N2O	MS1	M+H	123.054	113.55	3.68	2.98	2.91	4.93	5.63		6.89	7.02	5.64	12.06	12.22	10.89	26.92	25.27	28.18	45.28	48.83	45.84	113.5	113.5	113.5	113.5	113.5		113.5	113.5	113.4	113.4	113.4	109	113.4	113.4	112.3	113.4	113.4	112.3	0.6	0.81	0.77	0.84	0.74		0.85	0.9
10	Isonicotinamide [M+H]+ C6H6N2O NIST 1192306---Niacinamide; LC-ESI-QTOF; MS2; CE C6H6N2O	MS2	M+H	123.088	113.55	0	3.74	0	3.59	3.42		3.39	4.17	2.51	2.08	2.54	0.46	1.12	0	1.16	1.12	0.89	0	113.5	113.5	113.5	113.5	113.5		113.5	113.5	113.4	113.4	113.4	109	113.4	113.4	112.3	113.4	113.4	112.3	0.6	0.81	0.77	0.84	0.74		0.85	0.9
10	Isonicotinamide [M+H]+ C6H6N2O NIST 1192306---Niacinamide; LC-ESI-QTOF; MS2; CE C6H6N2O	MS2	M+H	123.058	113.55	0	0	0.54	0	0		1.39	0.54	0	1.19	1.23	0.46	1.28	1.78	1.16	1.85	2.43	4.06	113.5	113.5	113.5	113.5	113.5		113.5	113.5	113.4	113.4	113.4	109	113.4	113.4	112.3	113.4	113.4	112.3	0.6	0.81	0.77	0.84	0.74		0.85	0.9
10	Isonicotinamide [M+H]+ C6H6N2O NIST 1192306---Niacinamide; LC-ESI-QTOF; MS2; CE C6H6N2O	MS2	M+H	80.0549	113.55	5.89	8.16	8.2	5.89	8.07		8.28	5.42	3.3	4.25	5.01	4.27	4.27	4.45	6.33	6.55	5.39	5.32	113.5	113.5	113.5	113.5	113.5		113.5	113.5	113.4	113.4	113.4	109	113.4	113.4	112.3	113.4	113.4	112.3	0.6	0.81	0.77	0.84	0.74		0.85	0.9
10	Isonicotinamide [M+H]+ C6H6N2O NIST 1192306---Niacinamide; LC-ESI-QTOF; MS2; CE C6H6N2O	MS2	M+H	78.0354	113.55	6.76	6.18	6.25	7.18	0		7.17	7.63	2.67	4.17	3.89	3.38	3.37	3.01	4.15	2.97	3.73	3.1	113.5	113.5	113.5	113.5	113.5		113.5	113.5	113.4	113.4	113.4	109	113.4	113.4	112.3	113.4	113.4	112.3	0.6	0.81	0.77	0.84	0.74		0.85	0.9
10	Isonicotinamide [M+H]+ C6H6N2O NIST 1192306---Niacinamide; LC-ESI-QTOF; MS2; CE C6H6N2O	MS2	M+H	108.068	113.55	0	2.38	1.62	3.03	2.96		2.63	2.16	0	2.5	0	1.88	0	1.66	0	0	0	0	113.5	113.5	113.5	113.5	113.5		113.5	113.5	113.4	113.4	113.4	109	113.4	113.4	112.3	113.4	113.4	112.3	0.6	0.81	0.77	0.84	0.74		0.85	0.9
10	Isonicotinamide [M+H]+ C6H6N2O NIST 1192306---Niacinamide; LC-ESI-QTOF; MS2; CE C6H6N2O	MS2	M+H	79.0545	113.55	29.85	31.59	30.13	28.62	29.29		32.25	32.64	13.97	17.84	20	10.26	13.31	12.66	17.46	14.32	14.2	14.69	113.5	113.5	113.5	113.5	113.5		113.5	113.5	113.4	113.4	113.4	109	113.4	113.4	112.3	113.4	113.4	112.3	0.6	0.81	0.77	0.84	0.74		0.85	0.9
11	ISF of Niacinamide [2M+H]+ C6H6N2O NIST 1061094	MS1	-	80.0486	170.47	46	85.46	67.19	40.06	92.81	50.09	34.59	41.86	40.55	43.7	43.21	47.44	60.84	63.26	61.71	90.91	93.91	90.85	169.5	165.1	171.7	170.5	170.6	170.6	170.6	170.5	170.6	170.6	170.6	169.5	171.7	170.6	170.6	170.6	170.6	169.5	0.97	0.96	0.93	0.9	0.96	0.95	0.96	0.92
11	ISF of Niacinamide [2M+H]+ C6H6N2O NIST 1061094	MS2	-	80.0517	170.47	112.89	220.28	172.5	91.22	208.57	105.68	58.72	85.59	71.55	56.81	61.16	66.53	55.41	53.75	54.33	56.83	59.19	41.68	169.5	165.1	171.7	170.5	170.6	170.6	170.6	170.5	170.6	170.6	170.6	169.5	171.7	170.6	170.6	170.6	170.6	169.5	0.97	0.96	0.93	0.9	0.96	0.95	0.96	0.92
11	ISF of Niacinamide [2M+H]+ C6H6N2O NIST 1061094	MS2	-	53.0397	170.47	54.89	106.14	91.02	45.21	103.54	51.92	35.76	41.6	33.64	30.29	29.36	37.46	26.44	29.52	28.1	26.07	29.31	19.95	169.5	165.1	171.7	170.5	170.6	170.6	170.6	170.5	170.6	170.6	170.6	169.5	171.7	170.6	170.6	170.6	170.6	169.5	0.97	0.96	0.93	0.9	0.96	0.95	0.96	0.92
11	ISF of Niacinamide [2M+H]+ C6H6N2O NIST 1061094	MS2	-	78.0362	170.47	8.66	19.52	11.13	7.72	13.22	6.02	5.89	6.79	5.79	3.41	4.6	4.28	4.3	3.32	4.42	3.47	3.76	3.8	169.5	165.1	171.7	170.5	170.6	170.6	170.6	170.5	170.6	170.6	170.6	169.5	171.7	170.6	170.6	170.6	170.6	169.5	0.97	0.96	0.93	0.9	0.96	0.95	0.96	0.92
11	ISF of Niacinamide [2M+H]+ C6H6N2O NIST 1061094	MS2	-	62.9803	170.47	4.28	5.71	4.39	2.74	4.63	2.62	2.35	0	1.52	0	1.46	2.74	0	1.71	1.88	1.89	2.18	0.99	169.5	165.1	171.7	170.5	170.6	170.6	170.6	170.5	170.6	170.6	170.6	169.5	171.7	170.6	170.6	170.6	170.6	169.5	0.97	0.96	0.93	0.9	0.96	0.95	0.96	0.92
11	ISF of Niacinamide [2M+H]+ C6H6N2O NIST 1061094	MS2	-	51.0209	170.47	26.14	49.21	41.22	22.39	53.7	26.6	12.55	21.71	20.21	13.47	14.76	15.94	12.27	12.1	11.94	11.39	9.89	8.71	169.5	165.1	171.7	170.5	170.6	170.6	170.6	170.5	170.6	170.6	170.6	169.5	171.7	170.6	170.6	170.6	170.6	169.5	0.97	0.96	0.93	0.9	0.96	0.95	0.96	0.92
11	ISF of Niacinamide [2M+H]+ C6H6N2O NIST 1061094	MS2	-	53.0145	170.47	0	0	0.86	0	1.37	0	0	0	0	1.36	0.15	0	0	0	0	0	0	0.81	169.5	165.1	171.7	170.5	170.6	170.6	170.6	170.5	170.6	170.6	170.6	169.5	171.7	170.6	170.6	170.6	170.6	169.5	0.97	0.96	0.93	0.9	0.96	0.95	0.96	0.92
11	Niacinamide [2M+H]+ C6H6N2O NIST 1061094	MS1	M+H	123.055	169.98	129.45	123.22	126.35	295.01	297.81	299.84	592.42	589.8	566.54	1054.14	1053.58	1058.55	2338.85	2334.82	2339.07	4167.3	4381.11	4381.75	170.6	170.6	170.6	170.6	169.5	170.6	170.6	170.6	170.6	170.6	170.6	169.5	170.6	170.6	169.5	170.6	170.6	169.5	1	0.99	0.99	1	1	1	1	1
11	Niacinamide [2M+H]+ C6H6N2O NIST 1061094	MS2	M+H	123.056	169.98	81.5	87.71	84.27	195.29	202.12	231.82	471.38	438.75	433.94	754.78	831.91	676.65	1641.85	1730.71	1974.77	3282.7	2930.98	3429.16	170.6	170.6	170.6	170.6	169.5	170.6	170.6	170.6	170.6	170.6	170.6	169.5	170.6	170.6	169.5	170.6	170.6	169.5	1	0.99	0.99	1	1	1	1	1
11	Niacinamide [2M+H]+ C6H6N2O NIST 1061094	MS2	M+H	80.0495	169.98	70.5	68.04	80.19	180.34	169.09	165.02	343.74	341.44	337.63	702.13	652.71	606.76	1435.66	1517.81	1723.19	2787.86	2733.9	2847.45	170.6	170.6	170.6	170.6	169.5	170.6	170.6	170.6	170.6	170.6	170.6	169.5	170.6	170.6	169.5	170.6	170.6	169.5	1	0.99	0.99	1	1	1	1	1
11	Niacinamide [2M+H]+ C6H6N2O NIST 1061094	MS2	M+H	78.0337	169.98	24.76	20.73	27.12	64.4	54.24	57.83	124.54	118.04	113.91	243.19	221.1	228.88	465.36	543.49	566.24	965.76	961.18	981.72	170.6	170.6	170.6	170.6	169.5	170.6	170.6	170.6	170.6	170.6	170.6	169.5	170.6	170.6	169.5	170.6	170.6	169.5	1	0.99	0.99	1	1	1	1	1
11	Niacinamide [2M+H]+ C6H6N2O NIST 1061094	MS2	M+H	53.0388	169.98	15.26	14.63	15.37	43.02	32.75	38.53	75.99	73.14	69.68	146.12	134.84	135.21	293.3	342.43	316.01	613.11	605.76	568.65	170.6	170.6	170.6	170.6	169.5	170.6	170.6	170.6	170.6	170.6	170.6	169.5	170.6	170.6	169.5	170.6	170.6	169.5	1	0.99	0.99	1	1	1	1	1
11	Niacinamide [2M+H]+ C6H6N2O NIST 1061094	MS2	M+H	96.0442	169.98	3.76	4.55	5.46	10.23	10.47	10.93	22.55	23.53	19.74	43.04	40.03	35.44	103.61	104.63	119.55	208.12	184.45	210.95	170.6	170.6	170.6	170.6	169.5	170.6	170.6	170.6	170.6	170.6	170.6	169.5	170.6	170.6	169.5	170.6	170.6	169.5	1	0.99	0.99	1	1	1	1	1
11	Niacinamide [2M+H]+ C6H6N2O NIST 1061094	MS2	M+H	106.029	169.98	4.3	3.41	4.75	7.54	10.85	11.17	20.7	16.74	20.78	36.47	37.83	35.55	87.19	96.67	106.71	185.47	169.8	173.61	170.6	170.6	170.6	170.6	169.5	170.6	170.6	170.6	170.6	170.6	170.6	169.5	170.6	170.6	169.5	170.6	170.6	169.5	1	0.99	0.99	1	1	1	1	1
12	Thymine C5H6N2O2 MassBank 3820	MS1	M+H	127.049	132.85	8.81	7.93	7.46	20.63	19.89	22.77	48.39	43.62	46.73	83.57	84.05	81.18	203.3	210.43	207.39	390.77	400.15	392.81	132.1	132.1	133.2	133.2	132.1	133.2	133.2	133.2	133.2	133.2	133.2	129.9	133.2	133.2	133.2	133.2	133.2	133.2	0.99	0.96	0.99	1	0.97	0.97	1	0.99
12	Thymine C5H6N2O2 MassBank 3820	MS2	M+H	127.05	132.85	3.65	4.04	5.49	9.45	10.82	6.48	17.31	16.16	16.93	32.44	37.57	36.96	85.77	96.55	78.46	161.77	184.88	204.44	132.1	132.1	133.2	133.2	132.1	133.2	133.2	133.2	133.2	133.2	133.2	129.9	133.2	133.2	133.2	133.2	133.2	133.2	0.99	0.96	0.99	1	0.97	0.97	1	0.99
12	Thymine C5H6N2O2 MassBank 3820	MS2	M+H	110.024	132.85	4.62	3.21	3.38	8.44	6.64	6.61	17.14	17.55	15.58	25.75	31.38	27.15	70.4	73.74	69.55	138.43	154.28	154.51	132.1	132.1	133.2	133.2	132.1	133.2	133.2	133.2	133.2	133.2	133.2	129.9	133.2	133.2	133.2	133.2	133.2	133.2	0.99	0.96	0.99	1	0.97	0.97	1	0.99
12	Thymine C5H6N2O2 MassBank 3820	MS2	M+H	54.0338	132.85	1.36	1.54	1	2.72	2.43	2.77	6.35	5.27	4.89	9.94	9.43	9.39	27.2	23.57	25.75	52.52	52.2	50.64	132.1	132.1	133.2	133.2	132.1	133.2	133.2	133.2	133.2	133.2	133.2	129.9	133.2	133.2	133.2	133.2	133.2	133.2	0.99	0.96	0.99	1	0.97	0.97	1	0.99
12	Thymine C5H6N2O2 MassBank 3820	MS2	M+H	109.04	132.85	0.8	0.58	1.89	3.09	3.71	2.07	6.18	5.82	5.72	9.74	13.02	10.66	23.46	21.84	21.1	37.26	51.62	41.96	132.1	132.1	133.2	133.2	132.1	133.2	133.2	133.2	133.2	133.2	133.2	129.9	133.2	133.2	133.2	133.2	133.2	133.2	0.99	0.96	0.99	1	0.97	0.97	1	0.99
12	Thymine C5H6N2O2 MassBank 3820	MS2	M+H	84.0443	132.85	3.07	3.19	3.56	4.33	4.61	5.43	7.81	6.13	8.15	9.75	11.1	9.07	17.82	20.76	17.95	33.7	36.47	35.17	132.1	132.1	133.2	133.2	132.1	133.2	133.2	133.2	133.2	133.2	133.2	129.9	133.2	133.2	133.2	133.2	133.2	133.2	0.99	0.96	0.99	1	0.97	0.97	1	0.99
12	Thymine C5H6N2O2 MassBank 3820	MS2	M+H	82.0284	132.85	0.25	0	0.63	1.26	0.44	0.91	3.25	2.84	2.58	3.81	6.09	4.29	11.09	10.5	10.73	22.06	18.98	20.8	132.1	132.1	133.2	133.2	132.1	133.2	133.2	133.2	133.2	133.2	133.2	129.9	133.2	133.2	133.2	133.2	133.2	133.2	0.99	0.96	0.99	1	0.97	0.97	1	0.99
13	D-Pyroglutamic acid [M+H]+ C5H7NO3 NIST 1059574	MS1	M+H	130.049	57.85	8.48	7.97	7.72	8.73	9.66	8.62	14.8	14.21	12.66	22.14	19.65	19.37	32.62	33.47	34.12	53.76	54.84	54.64	57.9	57.9	57.9	59.5	58.4	58.4	58.4	58.4	58.4	58.4	58.4	58.4	58.4	58.4	58.4	58.4	58.4	58.4	0.73	0.73	0.7	0.79	0.81	0.82	0.9	0.85
13	D-Pyroglutamic acid [M+H]+ C5H7NO3 NIST 1059574	MS2	M+H	84.0444	57.85	15.25	15.37	15.7	17.62	17.61	16.86	29.4	27.45	31.93	47.6	40.87	41.65	67.38	84.02	77.9	116.17	123.06	141.29	57.9	57.9	57.9	59.5	58.4	58.4	58.4	58.4	58.4	58.4	58.4	58.4	58.4	58.4	58.4	58.4	58.4	58.4	0.73	0.73	0.7	0.79	0.81	0.82	0.9	0.85
13	D-Pyroglutamic acid [M+H]+ C5H7NO3 NIST 1059574	MS2	M+H	84.0817	57.85	9.26	7.72	6.96	7.25	7.18	6.05	11.31	9.91	10.85	15.97	16.18	20.03	32.28	34.9	36.13	54.68	53.11	62.72	57.9	57.9	57.9	59.5	58.4	58.4	58.4	58.4	58.4	58.4	58.4	58.4	58.4	58.4	58.4	58.4	58.4	58.4	0.73	0.73	0.7	0.79	0.81	0.82	0.9	0.85
13	D-Pyroglutamic acid [M+H]+ C5H7NO3 NIST 1059574	MS2	M+H	56.0497	57.85	11.1	11.65	12.13	11.54	9.44	10.71	12.72	13.23	15.76	26.89	27.98	24.45	45.05	43.93	45.78	61.98	58.54	58.04	57.9	57.9	57.9	59.5	58.4	58.4	58.4	58.4	58.4	58.4	58.4	58.4	58.4	58.4	58.4	58.4	58.4	58.4	0.73	0.73	0.7	0.79	0.81	0.82	0.9	0.85
13	D-Pyroglutamic acid [M+H]+ C5H7NO3 NIST 1059574	MS2	M+H	41.0385	57.85	220.62	229.44	223.54	136.39	103.19	92.25	109.64	107.72	105.04	144.75	145.91	145.27	144.63	127.62	157.91	131.83	130.17	126.07	57.9	57.9	57.9	59.5	58.4	58.4	58.4	58.4	58.4	58.4	58.4	58.4	58.4	58.4	58.4	58.4	58.4	58.4	0.73	0.73	0.7	0.79	0.81	0.82	0.9	0.85
13	D-Pyroglutamic acid [M+H]+ C5H7NO3 NIST 1059574	MS2	M+H	130.049	57.85	4.87	2.18	1.19	4.8	3.41	4.01	3.89	6.35	7.94	8.61	7.54	6.66	17.38	12.45	14.32	26.47	29.34	25.47	57.9	57.9	57.9	59.5	58.4	58.4	58.4	58.4	58.4	58.4	58.4	58.4	58.4	58.4	58.4	58.4	58.4	58.4	0.73	0.73	0.7	0.79	0.81	0.82	0.9	0.85
13	D-Pyroglutamic acid [M+H]+ C5H7NO3 NIST 1059574	MS2	M+H	130.086	57.85	0	0	0	0	0.59	1.19	0.28	0.83	1.11	1.62	0.91	1.58	4.76	4.64	6.82	9.06	8.38	7.55	57.9	57.9	57.9	59.5	58.4	58.4	58.4	58.4	58.4	58.4	58.4	58.4	58.4	58.4	58.4	58.4	58.4	58.4	0.73	0.73	0.7	0.79	0.81	0.82	0.9	0.85
14	Creatine [M+H]+ C4H9N3O2 NIST 1063404	MS1	M+H	132.076	62.03	98.62	97.66	96.24	209.62	210.23	222.06	372.45	387.65	375.84	578.84	532.72	555.8	1012.4	985.43	988.72	1552.12	1612.48	1587.91	61.7	61.7	61.7	61.7	61.7	61.7	61.7	61.7	61.7	61.7	61.7	61.7	61.7	61.7	61.7	61.7	61.7	61.7	1	0.99	1	1	1	1	1	1
14	Creatine [M+H]+ C4H9N3O2 NIST 1063404	MS2	M+H	44.0498	62.03	72	76.4	76.49	163.13	147.93	174.95	266.34	290.79	286.14	432.99	412.83	408.36	696.01	750.46	816.17	1095.88	1066.03	1129.25	61.7	61.7	61.7	61.7	61.7	61.7	61.7	61.7	61.7	61.7	61.7	61.7	61.7	61.7	61.7	61.7	61.7	61.7	1	0.99	1	1	1	1	1	1
14	Creatine [M+H]+ C4H9N3O2 NIST 1063404	MS2	M+H	90.0548	62.03	33.38	24.37	36	78.88	68.34	94.04	136.69	127.34	151.98	232.13	197.37	171.29	362.59	305.79	413.47	516.09	522.59	642.64	61.7	61.7	61.7	61.7	61.7	61.7	61.7	61.7	61.7	61.7	61.7	61.7	61.7	61.7	61.7	61.7	61.7	61.7	1	0.99	1	1	1	1	1	1
14	Creatine [M+H]+ C4H9N3O2 NIST 1063404	MS2	M+H	132.077	62.03	20.01	13.86	21.28	57.55	40.16	42.21	66.45	62.55	91.91	113.03	120.83	91.35	243.89	187.27	219.52	318.43	316.97	360.16	61.7	61.7	61.7	61.7	61.7	61.7	61.7	61.7	61.7	61.7	61.7	61.7	61.7	61.7	61.7	61.7	61.7	61.7	1	0.99	1	1	1	1	1	1
14	Creatine [M+H]+ C4H9N3O2 NIST 1063404	MS2	M+H	43.0292	62.03	12.71	15.73	13.17	38.92	35.04	33.2	59.06	64.46	67.23	95.69	94.85	89.64	166.9	179.28	204.93	279.99	281.9	262.05	61.7	61.7	61.7	61.7	61.7	61.7	61.7	61.7	61.7	61.7	61.7	61.7	61.7	61.7	61.7	61.7	61.7	61.7	1	0.99	1	1	1	1	1	1
14	Creatine [M+H]+ C4H9N3O2 NIST 1063404	MS2	M+H	87.055	62.03	1.67	0.97	2.4	5.93	6.51	7.2	8.27	7.96	9.6	14.61	8.55	11.51	20.57	21.3	26.1	36.47	34.72	42.47	61.7	61.7	61.7	61.7	61.7	61.7	61.7	61.7	61.7	61.7	61.7	61.7	61.7	61.7	61.7	61.7	61.7	61.7	1	0.99	1	1	1	1	1	1
14	Creatine [M+H]+ C4H9N3O2 NIST 1063404	MS2	M+H	86.0597	62.03	7.01	5.12	4.93	9.36	10.04	10.87	14.65	18.27	15.73	21.58	22.34	19.23	47.52	53.51	48.4	85.05	80.14	81.15	61.7	61.7	61.7	61.7	61.7	61.7	61.7	61.7	61.7	61.7	61.7	61.7	61.7	61.7	61.7	61.7	61.7	61.7	1	0.99	1	1	1	1	1	1
15	ISF of L-Isoleucine [M+H]+ C6H13NO2 NIST 1075957	MS1	-	86.0956	96.27	6.29	5.76	6.23	17.35	16.91	17.58	37.08	34.79	36.61	71.49	67.13	69.49	166.72	165.48	163.14	318.92	311.18	312.57	95.8	96.3	96.3	96.9	96.9	96.9	96.9	96.9	96.9	96.9	96.9	96.9	96.9	96.9	96.9	96.9	96.9	96.9	0.72	0.69	0.72	0.77	0.87	0.81	0.91	0.9
15	ISF of L-Isoleucine [M+H]+ C6H13NO2 NIST 1075957	MS2	-	86.099	96.27	4.63	5.2	6.76	12.5	15.62	12.25	36.28	31.67	30.61	65.55	69.35	61.42	176.4	198.94	192.25	372.79	324.02	378.85	95.8	96.3	96.3	96.9	96.9	96.9	96.9	96.9	96.9	96.9	96.9	96.9	96.9	96.9	96.9	96.9	96.9	96.9	0.72	0.69	0.72	0.77	0.87	0.81	0.91	0.9
15	ISF of L-Isoleucine [M+H]+ C6H13NO2 NIST 1075957	MS2	-	41.0394	96.27	43.57	72.58	75.17	47.07	47.64	44.71	51.47	50.18	49.43	64.73	57.75	58.35	91.61	84.26	79.21	125.2	127.7	121.36	95.8	96.3	96.3	96.9	96.9	96.9	96.9	96.9	96.9	96.9	96.9	96.9	96.9	96.9	96.9	96.9	96.9	96.9	0.72	0.69	0.72	0.77	0.87	0.81	0.91	0.9
15	ISF of L-Isoleucine [M+H]+ C6H13NO2 NIST 1075957	MS2	-	69.0716	96.27	1.04	0.63	1.61	2	2.03	1.97	4.17	3.88	3.96	7.52	5.3	7.85	16.12	17.94	18.89	34.88	32.22	34.99	95.8	96.3	96.3	96.9	96.9	96.9	96.9	96.9	96.9	96.9	96.9	96.9	96.9	96.9	96.9	96.9	96.9	96.9	0.72	0.69	0.72	0.77	0.87	0.81	0.91	0.9
15	ISF of L-Isoleucine [M+H]+ C6H13NO2 NIST 1075957	MS2	-	44.0506	96.27	4.09	8.17	6.12	5.99	5.18	5.14	6.73	5.76	6.73	6.97	8.82	7.48	12.84	15.28	13.2	22.34	20.58	19.87	95.8	96.3	96.3	96.9	96.9	96.9	96.9	96.9	96.9	96.9	96.9	96.9	96.9	96.9	96.9	96.9	96.9	96.9	0.72	0.69	0.72	0.77	0.87	0.81	0.91	0.9
15	ISF of L-Isoleucine [M+H]+ C6H13NO2 NIST 1075957	MS2	-	56.0488	96.27	4.02	6.56	6.73	5.22	6.15	4.78	5.9	4.1	4.89	4.66	5.42	6.06	9.81	8.3	8.44	14.38	11.7	14.86	95.8	96.3	96.3	96.9	96.9	96.9	96.9	96.9	96.9	96.9	96.9	96.9	96.9	96.9	96.9	96.9	96.9	96.9	0.72	0.69	0.72	0.77	0.87	0.81	0.91	0.9
15	ISF of L-Isoleucine [M+H]+ C6H13NO2 NIST 1075957	MS2	-	42.0344	96.27	39.03	72.16	65.7	41.16	38.37	38.79	42.02	42.54	38.59	42.3	40.91	41.25	44.14	43.83	45.5	45.64	49.09	55.67	95.8	96.3	96.3	96.9	96.9	96.9	96.9	96.9	96.9	96.9	96.9	96.9	96.9	96.9	96.9	96.9	96.9	96.9	0.72	0.69	0.72	0.77	0.87	0.81	0.91	0.9
15	L-Isoleucine [M+H]+ C6H13NO2 NIST 1075957	MS1	M+H	132.101	94.89	4.53	6.03	6.46	9.7	9.2	10.61	19	17.67	17.27	34.17	34.9	33.14	81.12	81.86	74.06	149.03	153.49	151.36	94.7	95.8	93.6	94.7	94.7	94.7	94.7	94.7	94.7	94.7	94.7	94.7	94.7	94.7	94.7	94.7	94.7	94.7	0.8	0.85	0.78	0.87	0.86	0.88	0.9	0.91
15	L-Isoleucine [M+H]+ C6H13NO2 NIST 1075957	MS2	M+H	86.0961	94.89	4.99	6.83	4.42	11.87	14.63	12.28	17.17	21.11	20.44	37.06	43.58	41.37	120.54	107.94	120.67	205.4	205.44	211.91	94.7	95.8	93.6	94.7	94.7	94.7	94.7	94.7	94.7	94.7	94.7	94.7	94.7	94.7	94.7	94.7	94.7	94.7	0.8	0.85	0.78	0.87	0.86	0.88	0.9	0.91
15	L-Isoleucine [M+H]+ C6H13NO2 NIST 1075957	MS2	M+H	44.0496	94.89	6.46	10.58	10.61	10.34	9.38	10.31	14.16	11.26	13.46	17.93	20.88	21.64	50.66	46.2	45.87	75.9	83.96	76.77	94.7	95.8	93.6	94.7	94.7	94.7	94.7	94.7	94.7	94.7	94.7	94.7	94.7	94.7	94.7	94.7	94.7	94.7	0.8	0.85	0.78	0.87	0.86	0.88	0.9	0.91
15	L-Isoleucine [M+H]+ C6H13NO2 NIST 1075957	MS2	M+H	69.0699	94.89	30.07	45.8	45.02	35.84	31.25	34.49	40.04	33.03	32.07	37.83	41.47	40.36	65.38	63.2	56.79	95.17	93.42	78.82	94.7	95.8	93.6	94.7	94.7	94.7	94.7	94.7	94.7	94.7	94.7	94.7	94.7	94.7	94.7	94.7	94.7	94.7	0.8	0.85	0.78	0.87	0.86	0.88	0.9	0.91
15	L-Isoleucine [M+H]+ C6H13NO2 NIST 1075957	MS2	M+H	41.0388	94.89	83.86	127.58	129.7	103.88	105.16	97.94	103.49	88	99.48	92.5	105.65	101.45	114.26	113.3	111.09	129.52	139.88	136.97	94.7	95.8	93.6	94.7	94.7	94.7	94.7	94.7	94.7	94.7	94.7	94.7	94.7	94.7	94.7	94.7	94.7	94.7	0.8	0.85	0.78	0.87	0.86	0.88	0.9	0.91
15	L-Isoleucine [M+H]+ C6H13NO2 NIST 1075957	MS2	M+H	57.0574	94.89	0.63	0.45	0	0.1	0.47	0.78	2.2	1.65	1.89	4.53	2.31	3.1	7.42	7.51	6.82	11.21	15.18	10.5	94.7	95.8	93.6	94.7	94.7	94.7	94.7	94.7	94.7	94.7	94.7	94.7	94.7	94.7	94.7	94.7	94.7	94.7	0.8	0.85	0.78	0.87	0.86	0.88	0.9	0.91
15	L-Isoleucine [M+H]+ C6H13NO2 NIST 1075957	MS2	M+H	56.0496	94.89	2.27	5.31	6.01	4.67	4.77	4.16	4.2	3.26	4.24	5.38	5.12	5.45	7.76	8.4	7.24	10.51	12.43	11.64	94.7	95.8	93.6	94.7	94.7	94.7	94.7	94.7	94.7	94.7	94.7	94.7	94.7	94.7	94.7	94.7	94.7	94.7	0.8	0.85	0.78	0.87	0.86	0.88	0.9	0.91
16	L-Aspartic acid [M+H]+ C4H7NO4 NIST 1076048---L-Aspartic acid [M+H]+ C4H7NO4 NIST 1076049---L-Aspartic acid [M+H]+ C4H7NO4 NIST 1076050	MS1	M+H	134.044	55.09	0.25		0.46	1.01	1.07	1.08	3.04	2.7	2.42	5.6	6.3	5.68	14.51	15.87	16.29	32.98	33.26	29	55.1		55.1	55.1	55.1	55.1	55.1	55.1	55.1	56.2	56.2	56.2	55.1	56.2	56.2	55.1	55.1	55.1	0.75		0.67	0.82	0.78	0.81	0.85	0.85
16	L-Aspartic acid [M+H]+ C4H7NO4 NIST 1076048---L-Aspartic acid [M+H]+ C4H7NO4 NIST 1076049---L-Aspartic acid [M+H]+ C4H7NO4 NIST 1076050	MS2	M+H	74.0257	55.09	1.14		1.32	3.96	3.6	2.79	7.76	5.81	4.32	8.47	12.66	10.84	22.18	24.69	21.89	32.04	39.32	41.97	55.1		55.1	55.1	55.1	55.1	55.1	55.1	55.1	56.2	56.2	56.2	55.1	56.2	56.2	55.1	55.1	55.1	0.75		0.67	0.82	0.78	0.81	0.85	0.85
16	L-Aspartic acid [M+H]+ C4H7NO4 NIST 1076048---L-Aspartic acid [M+H]+ C4H7NO4 NIST 1076049---L-Aspartic acid [M+H]+ C4H7NO4 NIST 1076050	MS2	M+H	88.0434	55.09	0.3		1.01	1.77	1.14	1.28	2.84	1.4	1.4	2.64	2.95	2.84	7.77	6.65	5.95	6.89	11.03	10.28	55.1		55.1	55.1	55.1	55.1	55.1	55.1	55.1	56.2	56.2	56.2	55.1	56.2	56.2	55.1	55.1	55.1	0.75		0.67	0.82	0.78	0.81	0.85	0.85
16	L-Aspartic acid [M+H]+ C4H7NO4 NIST 1076048---L-Aspartic acid [M+H]+ C4H7NO4 NIST 1076049---L-Aspartic acid [M+H]+ C4H7NO4 NIST 1076050	MS2	M+H	43.0181	55.09	94.47		98.18	92.55	102.16	92.77	95.41	99.52	95.98	28.27	32.09	33.22	113.82	36.61	42.36	40.46	42.43	43.07	55.1		55.1	55.1	55.1	55.1	55.1	55.1	55.1	56.2	56.2	56.2	55.1	56.2	56.2	55.1	55.1	55.1	0.75		0.67	0.82	0.78	0.81	0.85	0.85
16	L-Aspartic acid [M+H]+ C4H7NO4 NIST 1076048---L-Aspartic acid [M+H]+ C4H7NO4 NIST 1076049---L-Aspartic acid [M+H]+ C4H7NO4 NIST 1076050	MS2	M+H	70.0303	55.09	1.92		0	1.68	1.86	1.37	3.12	2.09	2.39	3.17	3.33	2.33	5.47	5.86	5.27	6.34	7.25	7.28	55.1		55.1	55.1	55.1	55.1	55.1	55.1	55.1	56.2	56.2	56.2	55.1	56.2	56.2	55.1	55.1	55.1	0.75		0.67	0.82	0.78	0.81	0.85	0.85
16	L-Aspartic acid [M+H]+ C4H7NO4 NIST 1076048---L-Aspartic acid [M+H]+ C4H7NO4 NIST 1076049---L-Aspartic acid [M+H]+ C4H7NO4 NIST 1076050	MS2	M+H	46.0289	55.09	0.47		1.16	0.73	1.42	1.01	2.1	1.79	1.25	1.93	3.46	2.06	5.1	4.23	4.94	6.52	6.7	6.69	55.1		55.1	55.1	55.1	55.1	55.1	55.1	55.1	56.2	56.2	56.2	55.1	56.2	56.2	55.1	55.1	55.1	0.75		0.67	0.82	0.78	0.81	0.85	0.85
16	L-Aspartic acid [M+H]+ C4H7NO4 NIST 1076048---L-Aspartic acid [M+H]+ C4H7NO4 NIST 1076049---L-Aspartic acid [M+H]+ C4H7NO4 NIST 1076050	MS2	M+H	116.042	55.09	0		0	0.07	0	0	0	0	0	0.67	0.52	0.94	0	0.79	1.57	2.96	2.96	1.13	55.1		55.1	55.1	55.1	55.1	55.1	55.1	55.1	56.2	56.2	56.2	55.1	56.2	56.2	55.1	55.1	55.1	0.75		0.67	0.82	0.78	0.81	0.85	0.85
17	1,4-Dibenzylpiperazine [M+H]+ C18H22N2 NIST 1220151	MS1	M+2H	134.095	528.5	4.03	3.32	3.05	5.72	4.76	4.63	10.59	10.5	9.07	16.83	19.06	18.61	49.91	46.91	48.64	103.5	103.96	102.43	528.5	528.5	528.5	528.5	529.2	528.1	528.1	528.1	528.1	528.1	528.1	528.1	528.1	528.1	528.1	528.1	528.1	528.1	0.7	0.74	0.75	0.81	0.77	0.79	0.84	0.87
17	1,4-Dibenzylpiperazine [M+H]+ C18H22N2 NIST 1220151	MS2	M+2H	134.096	528.5	8.34	11.13	11.77	12.22	8.58	8.9	12.39	16.28	14.33	28.14	29.02	26.2	74.63	99.93	66.62	144.67	156.14	179.96	528.5	528.5	528.5	528.5	529.2	528.1	528.1	528.1	528.1	528.1	528.1	528.1	528.1	528.1	528.1	528.1	528.1	528.1	0.7	0.74	0.75	0.81	0.77	0.79	0.84	0.87
17	1,4-Dibenzylpiperazine [M+H]+ C18H22N2 NIST 1220151	MS2	M+2H	118.065	528.5	4.91	2.99	2.99	5.07	3.36	4.28	6.43	10.71	10.33	15.01	16.98	16.05	47.05	45.26	39.1	91.38	95.39	109.87	528.5	528.5	528.5	528.5	529.2	528.1	528.1	528.1	528.1	528.1	528.1	528.1	528.1	528.1	528.1	528.1	528.1	528.1	0.7	0.74	0.75	0.81	0.77	0.79	0.84	0.87
17	1,4-Dibenzylpiperazine [M+H]+ C18H22N2 NIST 1220151	MS2	M+2H	91.0538	528.5	68.54	66.25	68.45	70.48	31.06	24.95	24.6	28.95	22.47	34.56	31.83	36.28	64.98	57.47	56.76	93.68	90.93	104.02	528.5	528.5	528.5	528.5	529.2	528.1	528.1	528.1	528.1	528.1	528.1	528.1	528.1	528.1	528.1	528.1	528.1	528.1	0.7	0.74	0.75	0.81	0.77	0.79	0.84	0.87
17	1,4-Dibenzylpiperazine [M+H]+ C18H22N2 NIST 1220151	MS2	M+2H	119.073	528.5	2.13	4.38	4.02	6.19	5.2	6.16	9.93	10.4	10.54	17.39	17.48	16.34	50.18	50.97	46.03	100.73	100.94	114.37	528.5	528.5	528.5	528.5	529.2	528.1	528.1	528.1	528.1	528.1	528.1	528.1	528.1	528.1	528.1	528.1	528.1	528.1	0.7	0.74	0.75	0.81	0.77	0.79	0.84	0.87
17	1,4-Dibenzylpiperazine [M+H]+ C18H22N2 NIST 1220151	MS2	M+2H	65.039	528.5	77.05	68.28	76.98	74.65	30.03	23.59	24.47	23.17	23.37	22.88	23.75	26.34	31.6	24.29	27.34	30	35.61	36.83	528.5	528.5	528.5	528.5	529.2	528.1	528.1	528.1	528.1	528.1	528.1	528.1	528.1	528.1	528.1	528.1	528.1	528.1	0.7	0.74	0.75	0.81	0.77	0.79	0.84	0.87
17	1,4-Dibenzylpiperazine [M+H]+ C18H22N2 NIST 1220151	MS2	M+2H	44.0494	528.5	215.37	213.36	204.62	218.87	81.94	73.59	65.73	64.39	63.76	64.21	60.62	62.97	63.77	67.8	67.54	62.59	69.07	73.12	528.5	528.5	528.5	528.5	529.2	528.1	528.1	528.1	528.1	528.1	528.1	528.1	528.1	528.1	528.1	528.1	528.1	528.1	0.7	0.74	0.75	0.81	0.77	0.79	0.84	0.87
17	2-Methylindoline [M+H]+ C9H11N NIST 1197856	MS1	M+H	134.095	528.47	3.87	3.21	3.01	5.63	4.76	4.63	10.59	10.5	9.07	16.83	19.06	18.61	49.91	46.91	48.64	103.5	103.96	102.43	528.5	528.5	528.5	528.5	529.2	528.1	528.1	528.1	528.1	528.1	528.1	528.1	528.1	528.1	528.1	528.1	528.1	528.1	0.88	0.87	0.88	0.92	0.9	0.93	0.94	0.96
17	2-Methylindoline [M+H]+ C9H11N NIST 1197856	MS2	M+H	134.097	528.47	8.2	10.57	11.33	12	8.58	8.9	12.39	16.28	14.33	28.14	29.02	26.2	74.63	99.93	66.62	144.67	156.14	179.96	528.5	528.5	528.5	528.5	529.2	528.1	528.1	528.1	528.1	528.1	528.1	528.1	528.1	528.1	528.1	528.1	528.1	528.1	0.88	0.87	0.88	0.92	0.9	0.93	0.94	0.96
17	2-Methylindoline [M+H]+ C9H11N NIST 1197856	MS2	M+H	118.065	528.47	4.54	2.99	2.95	4.9	3.36	4.28	6.43	10.71	10.33	15.01	16.98	16.05	47.05	45.26	39.1	91.38	95.39	109.87	528.5	528.5	528.5	528.5	529.2	528.1	528.1	528.1	528.1	528.1	528.1	528.1	528.1	528.1	528.1	528.1	528.1	528.1	0.88	0.87	0.88	0.92	0.9	0.93	0.94	0.96
17	2-Methylindoline [M+H]+ C9H11N NIST 1197856	MS2	M+H	91.0542	528.47	65.75	64.3	65.35	67.87	31.06	24.95	24.6	28.95	22.47	34.56	31.83	36.28	64.98	57.47	56.76	93.68	90.93	104.02	528.5	528.5	528.5	528.5	529.2	528.1	528.1	528.1	528.1	528.1	528.1	528.1	528.1	528.1	528.1	528.1	528.1	528.1	0.88	0.87	0.88	0.92	0.9	0.93	0.94	0.96
17	2-Methylindoline [M+H]+ C9H11N NIST 1197856	MS2	M+H	119.073	528.47	2.13	4.07	4.02	6.19	5.2	6.16	9.93	10.4	10.54	17.39	17.48	16.34	50.18	50.97	46.03	100.73	100.94	114.37	528.5	528.5	528.5	528.5	529.2	528.1	528.1	528.1	528.1	528.1	528.1	528.1	528.1	528.1	528.1	528.1	528.1	528.1	0.88	0.87	0.88	0.92	0.9	0.93	0.94	0.96
17	2-Methylindoline [M+H]+ C9H11N NIST 1197856	MS2	M+H	65.0379	528.47	73.82	65.28	74.22	72.02	30.03	23.59	24.47	23.17	23.37	22.88	23.75	26.34	31.6	24.29	27.34	30	35.61	36.83	528.5	528.5	528.5	528.5	529.2	528.1	528.1	528.1	528.1	528.1	528.1	528.1	528.1	528.1	528.1	528.1	528.1	528.1	0.88	0.87	0.88	0.92	0.9	0.93	0.94	0.96
17	2-Methylindoline [M+H]+ C9H11N NIST 1197856	MS2	M+H	87.0834	528.47	6.67	9.02	5.41	6.51	2.99	3	3.15	1.89	3.43	2.77	2.21	3.09	2.02	3.65	2.96	3.35	2.7	2.15	528.5	528.5	528.5	528.5	529.2	528.1	528.1	528.1	528.1	528.1	528.1	528.1	528.1	528.1	528.1	528.1	528.1	528.1	0.88	0.87	0.88	0.92	0.9	0.93	0.94	0.96
18	Adenine [2M+H]+ C5H5N5 NIST 1057273	MS1	M+H	136.061	145.18	56.04	57.29	54.59	137.36	137.63	136.72	270.34	273.29	289.27	497.52	511.33	500.91	1284.6	1228.97	1248.68	2253.66	2236.28	2352.1	145.3	145.3	145.3	145.3	145.3	145.3	145.3	145.3	145.3	145.3	145.3	143.1	146.4	145.3	145.3	145.3	145.3	145.3	0.99	0.98	0.99	0.99	1	1	1	1
18	Adenine [2M+H]+ C5H5N5 NIST 1057273	MS2	M+H	136.062	145.18	39.05	34.17	38.55	96.37	110.11	126.1	244.65	237.39	237.69	408.92	431.19	461.84	1098.58	1117.31	1357.32	2155.54	2428.06	2329.24	145.3	145.3	145.3	145.3	145.3	145.3	145.3	145.3	145.3	145.3	145.3	143.1	146.4	145.3	145.3	145.3	145.3	145.3	0.99	0.98	0.99	0.99	1	1	1	1
18	Adenine [2M+H]+ C5H5N5 NIST 1057273	MS2	M+H	119.035	145.18	32.78	32.99	28.54	80.31	86.77	78.87	187.35	166.99	167.56	293.91	328.16	329.42	820.62	787.64	808.67	1414.87	1455.31	1403.97	145.3	145.3	145.3	145.3	145.3	145.3	145.3	145.3	145.3	145.3	145.3	143.1	146.4	145.3	145.3	145.3	145.3	145.3	0.99	0.98	0.99	0.99	1	1	1	1
18	Adenine [2M+H]+ C5H5N5 NIST 1057273	MS2	M+H	92.024	145.18	7.12	9.1	6.15	14.78	14.44	17.15	27.5	29.84	31.44	61.72	65.18	65.42	182.92	173.76	170.89	324.65	327.36	314.16	145.3	145.3	145.3	145.3	145.3	145.3	145.3	145.3	145.3	145.3	145.3	143.1	146.4	145.3	145.3	145.3	145.3	145.3	0.99	0.98	0.99	0.99	1	1	1	1
18	Adenine [2M+H]+ C5H5N5 NIST 1057273	MS2	M+H	94.0399	145.18	8.19	7.16	8.25	11.64	11.12	11.06	19.04	15.39	14.63	25.35	23.83	29.38	61.34	56.51	61.28	96.92	96.89	107.52	145.3	145.3	145.3	145.3	145.3	145.3	145.3	145.3	145.3	145.3	145.3	143.1	146.4	145.3	145.3	145.3	145.3	145.3	0.99	0.98	0.99	0.99	1	1	1	1
18	Adenine [2M+H]+ C5H5N5 NIST 1057273	MS2	M+H	65.0133	145.18	0.17	0.31	0.56	0.79	2.1	1.71	6.62	4.43	4.77	8.1	8.04	8.94	24.64	23.97	20.15	44.42	41.94	37.34	145.3	145.3	145.3	145.3	145.3	145.3	145.3	145.3	145.3	145.3	145.3	143.1	146.4	145.3	145.3	145.3	145.3	145.3	0.99	0.98	0.99	0.99	1	1	1	1
18	Adenine [2M+H]+ C5H5N5 NIST 1057273	MS2	M+H	67.0288	145.18	1.45	2.36	0.94	3.33	2.16	3.61	8.57	6.03	6.97	10.69	10.82	10.19	34	33.42	26.82	60.6	59.72	60.06	145.3	145.3	145.3	145.3	145.3	145.3	145.3	145.3	145.3	145.3	145.3	143.1	146.4	145.3	145.3	145.3	145.3	145.3	0.99	0.98	0.99	0.99	1	1	1	1
18	ISF of Adenine [2M+H]+ C5H5N5 NIST 1057273	MS1	-	119.034	145.18	11.28	11.99	11.25	11.92	15.98	12.95	19.68	19.45	18.44	28.23	31.45	33.46	67.04	68.37	65.56	119.04	116.14	119.51	145.2	145.2	145.2	144.2	146.4	145.3	146.4	145.3	145.3	145.3	145.3	143.1	146.4	145.3	145.3	145.3	145.3	145.3	0.75	0.73	0.7	0.78	0.72	0.75	0.77	0.73
18	ISF of Adenine [2M+H]+ C5H5N5 NIST 1057273	MS2	-	91.056	145.18	60.62	58.44	58.81	41.89	70.7	46.26	44.86	44.92	42.85	40.05	44.08	46.75	43.1	42.08	45.96	39.63	41.27	40.24	145.2	145.2	145.2	144.2	146.4	145.3	146.4	145.3	145.3	145.3	145.3	143.1	146.4	145.3	145.3	145.3	145.3	145.3	0.75	0.73	0.7	0.78	0.72	0.75	0.77	0.73
18	ISF of Adenine [2M+H]+ C5H5N5 NIST 1057273	MS2	-	119.037	145.18	0	0	0	0	0	0	0	0	0	0	0	0.3	0.68	0.23	0.08	0.61	0.65	0.64	145.2	145.2	145.2	144.2	146.4	145.3	146.4	145.3	145.3	145.3	145.3	143.1	146.4	145.3	145.3	145.3	145.3	145.3	0.75	0.73	0.7	0.78	0.72	0.75	0.77	0.73
18	ISF of Adenine [2M+H]+ C5H5N5 NIST 1057273	MS2	-	119.087	145.18	7.51	7.61	7.18	4.33	8.48	3.72	6.23	4.01	7.62	5.67	0	5.05	4.68	5.93	4.83	4.18	5.99	4.59	145.2	145.2	145.2	144.2	146.4	145.3	146.4	145.3	145.3	145.3	145.3	143.1	146.4	145.3	145.3	145.3	145.3	145.3	0.75	0.73	0.7	0.78	0.72	0.75	0.77	0.73
18	ISF of Adenine [2M+H]+ C5H5N5 NIST 1057273	MS2	-	92.0245	145.18	0	0	0	0.2	0	0	0	0	0	0	0.27	0	0	0.87	0	0	0.07	0	145.2	145.2	145.2	144.2	146.4	145.3	146.4	145.3	145.3	145.3	145.3	143.1	146.4	145.3	145.3	145.3	145.3	145.3	0.75	0.73	0.7	0.78	0.72	0.75	0.77	0.73
18	ISF of Adenine [2M+H]+ C5H5N5 NIST 1057273	MS2	-	65.0384	145.18	15.45	19.35	16.57	10.84	21.35	14.09	13.3	14.29	12.74	12.98	12.09	14.99	12.16	12.02	12.09	13.15	11.38	11.01	145.2	145.2	145.2	144.2	146.4	145.3	146.4	145.3	145.3	145.3	145.3	143.1	146.4	145.3	145.3	145.3	145.3	145.3	0.75	0.73	0.7	0.78	0.72	0.75	0.77	0.73
18	ISF of Adenine [2M+H]+ C5H5N5 NIST 1057273	MS2	-	41.0397	145.18	89.35	91.99	89.37	60.44	105.25	67.56	68.82	69.04	61.77	65.72	63.11	70.95	60.41	66.42	63.24	64.62	63.62	64.5	145.2	145.2	145.2	144.2	146.4	145.3	146.4	145.3	145.3	145.3	145.3	143.1	146.4	145.3	145.3	145.3	145.3	145.3	0.75	0.73	0.7	0.78	0.72	0.75	0.77	0.73
19	Hypoxanthine [M+H]+ C5H4N4O NIST 1072315	MS1	M+H	137.045	96.27	84.57	82.42	79.1	191.95	199.31	193.35	354.83	373.02	374.61	639.41	647.81	629.73	1231.2	1280.94	1240.52	1963.34	1943	1889.48	95.8	95.8	95.8	95.8	95.8	95.8	95.8	95.8	95.8	95.8	95.8	95.8	95.8	95.8	95.8	95.8	95.8	95.8	1	1	0.99	1	1	0.99	1	1
19	Hypoxanthine [M+H]+ C5H4N4O NIST 1072315	MS2	M+H	137.046	96.27	75.86	77.88	78.88	193.51	173.91	168.32	334.87	390.32	287.94	560.94	624.87	574.83	1126.67	1176.08	1293.88	1626.01	1797.86	1656.4	95.8	95.8	95.8	95.8	95.8	95.8	95.8	95.8	95.8	95.8	95.8	95.8	95.8	95.8	95.8	95.8	95.8	95.8	1	1	0.99	1	1	0.99	1	1
19	Hypoxanthine [M+H]+ C5H4N4O NIST 1072315	MS2	M+H	119.035	96.27	23.64	22.34	20.87	60.1	60.7	58.76	116.61	126.67	128.21	190.15	190.01	202.37	405.47	407.69	388.65	577.42	604.33	593.05	95.8	95.8	95.8	95.8	95.8	95.8	95.8	95.8	95.8	95.8	95.8	95.8	95.8	95.8	95.8	95.8	95.8	95.8	1	1	0.99	1	1	0.99	1	1
19	Hypoxanthine [M+H]+ C5H4N4O NIST 1072315	MS2	M+H	110.035	96.27	26.74	27.07	29.82	71.16	70.84	75.48	148.31	148.08	146.74	274.33	250.1	264.52	536.68	547.7	522.87	792.46	838.14	826.58	95.8	95.8	95.8	95.8	95.8	95.8	95.8	95.8	95.8	95.8	95.8	95.8	95.8	95.8	95.8	95.8	95.8	95.8	1	1	0.99	1	1	0.99	1	1
19	Hypoxanthine [M+H]+ C5H4N4O NIST 1072315	MS2	M+H	94.0396	96.27	9.77	12.88	9.25	23.73	24.5	26.84	44.97	44.46	43.43	75.51	79.25	81.26	161.01	157.46	153.32	215.26	239.82	221.76	95.8	95.8	95.8	95.8	95.8	95.8	95.8	95.8	95.8	95.8	95.8	95.8	95.8	95.8	95.8	95.8	95.8	95.8	1	1	0.99	1	1	0.99	1	1
19	Hypoxanthine [M+H]+ C5H4N4O NIST 1072315	MS2	M+H	55.0293	96.27	5.38	5.56	4.84	12.55	16.97	15.93	32.88	28.6	37.38	66.26	66.21	61.31	117.36	133.71	131.64	198.85	221.47	200.26	95.8	95.8	95.8	95.8	95.8	95.8	95.8	95.8	95.8	95.8	95.8	95.8	95.8	95.8	95.8	95.8	95.8	95.8	1	1	0.99	1	1	0.99	1	1
19	Hypoxanthine [M+H]+ C5H4N4O NIST 1072315	MS2	M+H	82.04	96.27	6.02	6.99	5.96	10.89	13.67	12.97	22.61	24.27	28.42	56.77	49.86	42.71	106.38	94.46	102.49	159.18	163.01	150.61	95.8	95.8	95.8	95.8	95.8	95.8	95.8	95.8	95.8	95.8	95.8	95.8	95.8	95.8	95.8	95.8	95.8	95.8	1	1	0.99	1	1	0.99	1	1
19	ISF of Hypoxanthine [M+H]+ C5H4N4O NIST 1072315	MS1	-	110.034	97.43							7.74	7.99	7.65	15.53	14.28	14.86	32.54	29.46	31.9	52.63	52.35	53.04							96.9	96.9	96.9	96.9	96.9	96.9	98	96.9	96.9	96.9	98	96.9							0.75	0.79
19	ISF of Hypoxanthine [M+H]+ C5H4N4O NIST 1072315	MS2	-	60.988	97.43							8.68	8.08	10.17	9.39	8.78	7.9	10.66	10.78	11.35	9.53	7.69	10.65							96.9	96.9	96.9	96.9	96.9	96.9	98	96.9	96.9	96.9	98	96.9							0.75	0.79
19	ISF of Hypoxanthine [M+H]+ C5H4N4O NIST 1072315	MS2	-	82.0468	97.43							0	0.19	0	0	0	0.5	0.69	0.72	0	1.8	1.97	2.9							96.9	96.9	96.9	96.9	96.9	96.9	98	96.9	96.9	96.9	98	96.9							0.75	0.79
19	ISF of Hypoxanthine [M+H]+ C5H4N4O NIST 1072315	MS2	-	68.98	97.43							6.59	5.33	5.84	5.81	6.48	6.39	8.96	7.73	7.82	9.17	6.95	5.34							96.9	96.9	96.9	96.9	96.9	96.9	98	96.9	96.9	96.9	98	96.9							0.75	0.79
19	ISF of Hypoxanthine [M+H]+ C5H4N4O NIST 1072315	MS2	-	55.0569	97.43							18.95	17.88	20.03	19.88	19.91	19.96	22.79	23.4	23.98	25.3	22.3	21.16							96.9	96.9	96.9	96.9	96.9	96.9	98	96.9	96.9	96.9	98	96.9							0.75	0.79
19	ISF of Hypoxanthine [M+H]+ C5H4N4O NIST 1072315	MS2	-	110.086	97.43							0.07	0	0	0	0	0	0	0	0	0	0	0.29							96.9	96.9	96.9	96.9	96.9	96.9	98	96.9	96.9	96.9	98	96.9							0.75	0.79
19	ISF of Hypoxanthine [M+H]+ C5H4N4O NIST 1072315	MS2	-	110.033	97.43							0	0	0	0.51	0	0	0.77	0.99	0	0.36	0.73	0.66							96.9	96.9	96.9	96.9	96.9	96.9	98	96.9	96.9	96.9	98	96.9							0.75	0.79
20	UROCANIC ACID C6H6N2O2---Urocanic acid C6H6N2O2	MS1	M+H	139.049	884.23	49.13	49.05	48.04	50.97	49.81	51.95	52.68	47.7	50.19	48.54	40.11	53.47	49.12	51.31	47.17	52.54	48.83	50.38	884.2	884.2	884.2	884.2	884.2	884.2	884.2	884.2	884.2	884.2	890	884.2	884.2	884.2	884.2	884.2	884.2	884.2	0.93	0.92	0.93	0.9	0.92	0.93	0.93	0.91
20	UROCANIC ACID C6H6N2O2---Urocanic acid C6H6N2O2	MS2	M+H	121.042	884.23	87.68	80.74	88.56	88.9	85.58	82.71	84.32	83.37	94.81	70.71	65.61	79.5	77.49	85.88	83.95	85.19	87.36	85.41	884.2	884.2	884.2	884.2	884.2	884.2	884.2	884.2	884.2	884.2	890	884.2	884.2	884.2	884.2	884.2	884.2	884.2	0.93	0.92	0.93	0.9	0.92	0.93	0.93	0.91
20	UROCANIC ACID C6H6N2O2---Urocanic acid C6H6N2O2	MS2	M+H	93.0447	884.23	60.89	57.95	69.61	66.91	64.13	68.31	60.42	66.61	67.02	69.09	45.29	66.66	59.43	69.25	65.33	61.93	62.28	59.16	884.2	884.2	884.2	884.2	884.2	884.2	884.2	884.2	884.2	884.2	890	884.2	884.2	884.2	884.2	884.2	884.2	884.2	0.93	0.92	0.93	0.9	0.92	0.93	0.93	0.91
20	UROCANIC ACID C6H6N2O2---Urocanic acid C6H6N2O2	MS2	M+H	139.052	884.23	15.2	16.08	12.7	15.04	14.39	14.54	14.09	14.16	17.19	12.37	13.46	16.12	16.16	10.84	10.67	13.65	12.49	11.35	884.2	884.2	884.2	884.2	884.2	884.2	884.2	884.2	884.2	884.2	890	884.2	884.2	884.2	884.2	884.2	884.2	884.2	0.93	0.92	0.93	0.9	0.92	0.93	0.93	0.91
20	UROCANIC ACID C6H6N2O2---Urocanic acid C6H6N2O2	MS2	M+H	139.125	884.23	28.66	24.67	23.94	29.07	24.69	22.21	30.07	26.9	28.11	31.99	6.58	26.82	25.21	24.63	23.23	27.02	25.67	27.29	884.2	884.2	884.2	884.2	884.2	884.2	884.2	884.2	884.2	884.2	890	884.2	884.2	884.2	884.2	884.2	884.2	884.2	0.93	0.92	0.93	0.9	0.92	0.93	0.93	0.91
20	UROCANIC ACID C6H6N2O2---Urocanic acid C6H6N2O2	MS2	M+H	66.0336	884.23	14.59	13.94	13.54	12.64	12.34	14.65	13.25	14.8	13.04	14.67	7.37	13.84	15	12.3	13.73	12.29	13.63	14.17	884.2	884.2	884.2	884.2	884.2	884.2	884.2	884.2	884.2	884.2	890	884.2	884.2	884.2	884.2	884.2	884.2	884.2	0.93	0.92	0.93	0.9	0.92	0.93	0.93	0.91
20	UROCANIC ACID C6H6N2O2---Urocanic acid C6H6N2O2	MS2	M+H	55.0541	884.23	123.11	132.83	127.88	120.49	129.52	126.5	133.4	138.32	140.39	128.94	55.39	124.58	124.65	128.4	142.65	137	133.68	116.13	884.2	884.2	884.2	884.2	884.2	884.2	884.2	884.2	884.2	884.2	890	884.2	884.2	884.2	884.2	884.2	884.2	884.2	0.93	0.92	0.93	0.9	0.92	0.93	0.93	0.91
21	Acetylcholine cation [Cat]+ C7H16NO2 NIST 1065239---Acetylcholine cation [Cat]+ C7H16NO2 NIST 1065240	MS1	M	146.117	77.2	32.92	29.5	29.08	75.18	79.15	80.39	171.16	170.2	164.75	318.57	306.47	325.08	790.57	787.16	813.83	1522.97	1527.09	1573.86	80.4	81.5	80.4	80.4	80.4	80.4	79.3	79.3	79.3	79.3	79.3	79.3	78.2	78.2	78.2	77.1	77.1	77.1	0.99	0.95	0.98	0.99	0.99	0.99	1	1
21	Acetylcholine cation [Cat]+ C7H16NO2 NIST 1065239---Acetylcholine cation [Cat]+ C7H16NO2 NIST 1065240	MS2	M	87.0441	77.2	50.19	42.95	46.92	136.4	137.94	134.79	277.92	302.6	304.87	604.59	598.11	588.29	1490.14	1476.07	1649.59	3255.87	3034.66	2882.78	80.4	81.5	80.4	80.4	80.4	80.4	79.3	79.3	79.3	79.3	79.3	79.3	78.2	78.2	78.2	77.1	77.1	77.1	0.99	0.95	0.98	0.99	0.99	0.99	1	1
21	Acetylcholine cation [Cat]+ C7H16NO2 NIST 1065239---Acetylcholine cation [Cat]+ C7H16NO2 NIST 1065240	MS2	M	43.018	77.2	101.15	88.41	90.99	135.13	133.79	147.36	217.36	239.9	234.01	350.98	365.7	357.96	760.66	718.43	751.33	1345.27	1339.45	1214.15	80.4	81.5	80.4	80.4	80.4	80.4	79.3	79.3	79.3	79.3	79.3	79.3	78.2	78.2	78.2	77.1	77.1	77.1	0.99	0.95	0.98	0.99	0.99	0.99	1	1
21	Acetylcholine cation [Cat]+ C7H16NO2 NIST 1065239---Acetylcholine cation [Cat]+ C7H16NO2 NIST 1065240	MS2	M	146.117	77.2	3.91	1.09	4.39	11.83	10.77	9.57	18.15	18.79	23.66	52.36	39.06	35.7	98.05	97.78	131.01	250.23	231.93	211.94	80.4	81.5	80.4	80.4	80.4	80.4	79.3	79.3	79.3	79.3	79.3	79.3	78.2	78.2	78.2	77.1	77.1	77.1	0.99	0.95	0.98	0.99	0.99	0.99	1	1
21	Acetylcholine cation [Cat]+ C7H16NO2 NIST 1065239---Acetylcholine cation [Cat]+ C7H16NO2 NIST 1065240	MS2	M	60.0807	77.2	1.78	1.38	1.32	4.26	3.7	4.64	7.41	10.04	9.09	16.56	17.82	15.89	42.48	46.05	55.11	119.8	98.79	93.33	80.4	81.5	80.4	80.4	80.4	80.4	79.3	79.3	79.3	79.3	79.3	79.3	78.2	78.2	78.2	77.1	77.1	77.1	0.99	0.95	0.98	0.99	0.99	0.99	1	1
21	Acetylcholine cation [Cat]+ C7H16NO2 NIST 1065239---Acetylcholine cation [Cat]+ C7H16NO2 NIST 1065240	MS2	M	58.0655	77.2	3.74	4.44	4.85	6.16	6.12	6.97	8.02	8.79	9.66	11.63	9.75	10.43	20.34	19.08	20.06	35.92	29.54	31.81	80.4	81.5	80.4	80.4	80.4	80.4	79.3	79.3	79.3	79.3	79.3	79.3	78.2	78.2	78.2	77.1	77.1	77.1	0.99	0.95	0.98	0.99	0.99	0.99	1	1
21	Acetylcholine cation [Cat]+ C7H16NO2 NIST 1065239---Acetylcholine cation [Cat]+ C7H16NO2 NIST 1065240	MS2	M	86.0954	77.2	2.48	1.05	0.45	1.37	0	1.45	5.92	8.62	10.82	12.98	15.44	16.89	70.24	59.95	72.02	88.84	77.82	97.71	80.4	81.5	80.4	80.4	80.4	80.4	79.3	79.3	79.3	79.3	79.3	79.3	78.2	78.2	78.2	77.1	77.1	77.1	0.99	0.95	0.98	0.99	0.99	0.99	1	1
21	ISF of Acetylcholine cation [Cat]+ C7H16NO2 NIST 1065239---Acetylcholine cation [Cat]+ C7H16NO2 NIST 1065240	MS1	-	87.0432	77.2	6.32	6.42	5.56	11.48	12.48	12.3	27.12	26.44	26.85	53.14	48.83	52.32	123.55	128.39	130.87	245.67	248.79	251.09	77.2	77.2	77.2	81.5	80.4	80.4	80.4	79.3	79.3	79.3	79.3	79.3	78.2	78.2	78.2	77.1	77.1	77.1	0.74	0.69	0.77	0.8	0.74	0.79	0.84	0.77
21	ISF of Acetylcholine cation [Cat]+ C7H16NO2 NIST 1065239---Acetylcholine cation [Cat]+ C7H16NO2 NIST 1065240	MS2	-	43.0187	77.2	38.59	37.59	37.21	24.57	28.87	31.88	32.5	46.67	43.63	43.06	39.76	39.04	61.47	61.87	63.11	78.1	85.71	84.79	77.2	77.2	77.2	81.5	80.4	80.4	80.4	79.3	79.3	79.3	79.3	79.3	78.2	78.2	78.2	77.1	77.1	77.1	0.74	0.69	0.77	0.8	0.74	0.79	0.84	0.77
21	ISF of Acetylcholine cation [Cat]+ C7H16NO2 NIST 1065239---Acetylcholine cation [Cat]+ C7H16NO2 NIST 1065240	MS2	-	87.0524	77.2	0.39	0	0.19	0.65	0.26	0.71	0.78	0.39	0.58	2.66	2.73	1.42	6.08	6.43	8.1	9.64	9.49	12.38	77.2	77.2	77.2	81.5	80.4	80.4	80.4	79.3	79.3	79.3	79.3	79.3	78.2	78.2	78.2	77.1	77.1	77.1	0.74	0.69	0.77	0.8	0.74	0.79	0.84	0.77
21	ISF of Acetylcholine cation [Cat]+ C7H16NO2 NIST 1065239---Acetylcholine cation [Cat]+ C7H16NO2 NIST 1065240	MS2	-	44.0124	77.2	5.52	4.55	6.44	3.36	3.22	4.22	3.72	3.3	5.22	4.64	3.64	4.1	5.97	7.22	6.16	7.17	7.64	6.49	77.2	77.2	77.2	81.5	80.4	80.4	80.4	79.3	79.3	79.3	79.3	79.3	78.2	78.2	78.2	77.1	77.1	77.1	0.74	0.69	0.77	0.8	0.74	0.79	0.84	0.77
21	ISF of Acetylcholine cation [Cat]+ C7H16NO2 NIST 1065239---Acetylcholine cation [Cat]+ C7H16NO2 NIST 1065240	MS2	-	44.0504	77.2	6.87	7.51	8.32	4.3	4.44	5.18	5.88	8.88	9.33	9.16	8.86	8.43	24.93	23.74	23.73	38.3	40.24	37.62	77.2	77.2	77.2	81.5	80.4	80.4	80.4	79.3	79.3	79.3	79.3	79.3	78.2	78.2	78.2	77.1	77.1	77.1	0.74	0.69	0.77	0.8	0.74	0.79	0.84	0.77
21	ISF of Acetylcholine cation [Cat]+ C7H16NO2 NIST 1065239---Acetylcholine cation [Cat]+ C7H16NO2 NIST 1065240	MS2	-	42.0362	77.2	64.36	63.76	62.79	39.62	48.56	49.6	47.2	69.98	65.59	67.49	66.22	59.6	91.68	84.44	88.44	94.88	96.09	96.89	77.2	77.2	77.2	81.5	80.4	80.4	80.4	79.3	79.3	79.3	79.3	79.3	78.2	78.2	78.2	77.1	77.1	77.1	0.74	0.69	0.77	0.8	0.74	0.79	0.84	0.77
21	ISF of Acetylcholine cation [Cat]+ C7H16NO2 NIST 1065239---Acetylcholine cation [Cat]+ C7H16NO2 NIST 1065240	MS2	-	70.0294	77.2	0	0	0	0	0	0	0	0	0	0	0	0	0	0	0.06	0	0	0	77.2	77.2	77.2	81.5	80.4	80.4	80.4	79.3	79.3	79.3	79.3	79.3	78.2	78.2	78.2	77.1	77.1	77.1	0.74	0.69	0.77	0.8	0.74	0.79	0.84	0.77
22	5,6-Dimethylbenzimidazole C9H10N2	MS1	M+H	147.091	524.37	4.86	4.95	5.69	9.78	8.95	9.08	20.87	18.96	20.48	36.4	37.59	37.08	98.73	89.72	87.64	169.1	174.51	182.36	524.8	524.8	524.8	524.8	524.8	524.8	524.8	524.8	524.8	524.8	524.8	524.8	523.7	524.8	523.7	524.8	524.8	524.8	0.92	0.96	0.93	0.96	0.99	0.98	0.99	1
22	5,6-Dimethylbenzimidazole C9H10N2	MS2	M+H	147.092	524.37	6.42	6.99	6.13	12.07	17.4	12.5	24.6	30.72	28.52	55.44	47.79	51.4	146.34	162.39	131.74	283.47	291.46	320.24	524.8	524.8	524.8	524.8	524.8	524.8	524.8	524.8	524.8	524.8	524.8	524.8	523.7	524.8	523.7	524.8	524.8	524.8	0.92	0.96	0.93	0.96	0.99	0.98	0.99	1
22	5,6-Dimethylbenzimidazole C9H10N2	MS2	M+H	131.06	524.37	2.03	2.71	2.87	2.71	4.54	8.44	7.16	8.36	10.36	13.3	13.84	16.83	34.56	37.05	41.08	93.85	86.84	98.53	524.8	524.8	524.8	524.8	524.8	524.8	524.8	524.8	524.8	524.8	524.8	524.8	523.7	524.8	523.7	524.8	524.8	524.8	0.92	0.96	0.93	0.96	0.99	0.98	0.99	1
22	5,6-Dimethylbenzimidazole C9H10N2	MS2	M+H	132.068	524.37	1.16	2.48	2.52	2.48	6.04	5.57	8.59	8.17	7.47	13.49	15.17	15.88	42.38	33.06	40.5	76.26	87.98	109.36	524.8	524.8	524.8	524.8	524.8	524.8	524.8	524.8	524.8	524.8	524.8	524.8	523.7	524.8	523.7	524.8	524.8	524.8	0.92	0.96	0.93	0.96	0.99	0.98	0.99	1
22	5,6-Dimethylbenzimidazole C9H10N2	MS2	M+H	145.075	524.37	0.33	0.25	0	1.42	2.35	0.84	1.38	2.22	3.06	2.86	4.15	5.29	6.18	8.67	7.72	12.34	14.84	16.69	524.8	524.8	524.8	524.8	524.8	524.8	524.8	524.8	524.8	524.8	524.8	524.8	523.7	524.8	523.7	524.8	524.8	524.8	0.92	0.96	0.93	0.96	0.99	0.98	0.99	1
22	5,6-Dimethylbenzimidazole C9H10N2	MS2	M+H	120.081	524.37	3.8	3.57	3.63	4.99	4.29	4.58	5.12	6.69	5.75	7.29	5.49	8.03	11.88	15.74	14.05	28.16	26.87	36.22	524.8	524.8	524.8	524.8	524.8	524.8	524.8	524.8	524.8	524.8	524.8	524.8	523.7	524.8	523.7	524.8	524.8	524.8	0.92	0.96	0.93	0.96	0.99	0.98	0.99	1
22	5,6-Dimethylbenzimidazole C9H10N2	MS2	M+H	104.049	524.37	0	0	0.42	0.53	1.2	1.03	1.49	2.32	0.89	2.26	2.54	2.7	3.21	6.23	4.91	9.47	11.24	11.1	524.8	524.8	524.8	524.8	524.8	524.8	524.8	524.8	524.8	524.8	524.8	524.8	523.7	524.8	523.7	524.8	524.8	524.8	0.92	0.96	0.93	0.96	0.99	0.98	0.99	1
23	4-Chromanone [M+H]+ C9H8O2 NIST 1227936	MS1	M+H	149.058	185.66	3.33	2.82	4.3	4.16	4.61	3.31	3.8	4.87	5.27	5.1	5.53	5.12	7.78	9.12	8.06	15.2	15.08	14.52	185.7	185.7	185.7	185.7	185.7	185.7	185.7	185.7	185.7	185.7	185.7	185.7	186	184.9	184.9	184.9	186	184.9	0.95	0.97	0.96	0.95	0.96	0.97	0.98	0.97
23	4-Chromanone [M+H]+ C9H8O2 NIST 1227936	MS2	M+H	149.023	185.66	67.18	80.66	73.75	71.83	72.63	75.4	64.18	70.03	70.17	69.18	60.15	66.76	25.11	35	44.54	33.78	32.36	37.4	185.7	185.7	185.7	185.7	185.7	185.7	185.7	185.7	185.7	185.7	185.7	185.7	186	184.9	184.9	184.9	186	184.9	0.95	0.97	0.96	0.95	0.96	0.97	0.98	0.97
23	4-Chromanone [M+H]+ C9H8O2 NIST 1227936	MS2	M+H	103.054	185.66	15.55	13.5	17.81	12.75	15.66	14.07	17.9	15.51	12.26	18.58	14.52	15.57	14.32	13.99	15.57	21.98	19.96	23.07	185.7	185.7	185.7	185.7	185.7	185.7	185.7	185.7	185.7	185.7	185.7	185.7	186	184.9	184.9	184.9	186	184.9	0.95	0.97	0.96	0.95	0.96	0.97	0.98	0.97
23	4-Chromanone [M+H]+ C9H8O2 NIST 1227936	MS2	M+H	121.03	185.66	74.72	73.41	60.44	71.82	70.59	62.12	67.25	81.59	68.93	75.98	64.57	68.65	23.04	28.52	42.7	28.4	28.59	49.76	185.7	185.7	185.7	185.7	185.7	185.7	185.7	185.7	185.7	185.7	185.7	185.7	186	184.9	184.9	184.9	186	184.9	0.95	0.97	0.96	0.95	0.96	0.97	0.98	0.97
23	4-Chromanone [M+H]+ C9H8O2 NIST 1227936	MS2	M+H	65.038	185.66	84.78	85.22	84.68	88.68	81.41	91.67	83.05	76.35	82.9	89.89	87.58	81.76	42.7	41.01	49.02	40.25	37.88	47.83	185.7	185.7	185.7	185.7	185.7	185.7	185.7	185.7	185.7	185.7	185.7	185.7	186	184.9	184.9	184.9	186	184.9	0.95	0.97	0.96	0.95	0.96	0.97	0.98	0.97
23	4-Chromanone [M+H]+ C9H8O2 NIST 1227936	MS2	M+H	93.0333	185.66	35.62	35.85	32.31	41.33	25.99	28.39	33.52	29.22	27.07	23.4	26.63	29.98	14.84	13.21	16.85	16.39	12.49	27.17	185.7	185.7	185.7	185.7	185.7	185.7	185.7	185.7	185.7	185.7	185.7	185.7	186	184.9	184.9	184.9	186	184.9	0.95	0.97	0.96	0.95	0.96	0.97	0.98	0.97
23	4-Chromanone [M+H]+ C9H8O2 NIST 1227936	MS2	M+H	77.0387	185.66	67.72	60.03	69.36	70.35	64.44	70.8	67.19	65.17	66.03	72.17	76.28	65.21	41.92	35.68	46.29	35.51	40.52	48.83	185.7	185.7	185.7	185.7	185.7	185.7	185.7	185.7	185.7	185.7	185.7	185.7	186	184.9	184.9	184.9	186	184.9	0.95	0.97	0.96	0.95	0.96	0.97	0.98	0.97
23	ISF of 4-Chromanone [M+H]+ C9H8O2 NIST 1227936	MS1	-	103.053	185.66	10.89	11.89	10.86	23.36	11.98	12.92	15.51	17.54	17.42	23.63	26.05	25.67	56.31	56.21	52.97	99.73	102.59	100.03	185.7	185.7	185.7	186	184.9	186	184.9	186	184.9	186	186	184.9	186	184.9	184.9	184.9	186	184.9	0.81	0.81	0.81	0.82	0.83	0.83	0.9	0.87
23	ISF of 4-Chromanone [M+H]+ C9H8O2 NIST 1227936	MS2	-	77.0409	185.66	51.13	58.86	53.39	99.86	39.14	40.27	37.57	44.18	42.9	43.05	50.09	52.26	77.95	74.65	71.39	112.94	123.1	119.49	185.7	185.7	185.7	186	184.9	186	184.9	186	184.9	186	186	184.9	186	184.9	184.9	184.9	186	184.9	0.81	0.81	0.81	0.82	0.83	0.83	0.9	0.87
23	ISF of 4-Chromanone [M+H]+ C9H8O2 NIST 1227936	MS2	-	103.059	185.66	25.09	20.14	22.98	45.66	19.07	22.48	25.45	29.89	25.7	36.64	44.94	41	84.58	97.4	95.21	185.92	181.36	179.65	185.7	185.7	185.7	186	184.9	186	184.9	186	184.9	186	186	184.9	186	184.9	184.9	184.9	186	184.9	0.81	0.81	0.81	0.82	0.83	0.83	0.9	0.87
23	ISF of 4-Chromanone [M+H]+ C9H8O2 NIST 1227936	MS2	-	51.0238	185.66	15.23	12.99	15.86	29.78	8.88	9.47	9.93	10.42	10	9.14	12.11	12.07	15.72	13.97	12.42	21.87	20.62	18.25	185.7	185.7	185.7	186	184.9	186	184.9	186	184.9	186	186	184.9	186	184.9	184.9	184.9	186	184.9	0.81	0.81	0.81	0.82	0.83	0.83	0.9	0.87
23	ISF of 4-Chromanone [M+H]+ C9H8O2 NIST 1227936	MS2	-	43.02	185.66	108.75	98.36	106.88	184.95	72.42	76.33	62.28	68.7	63.96	47.06	68.84	62.91	49.53	51.94	51.27	47.36	44.37	49.85	185.7	185.7	185.7	186	184.9	186	184.9	186	184.9	186	186	184.9	186	184.9	184.9	184.9	186	184.9	0.81	0.81	0.81	0.82	0.83	0.83	0.9	0.87
23	ISF of 4-Chromanone [M+H]+ C9H8O2 NIST 1227936	MS2	-	41.0416	185.66	89.46	94.05	92.66	171.56	59.91	63.67	54.75	62.92	48.42	44.45	59.29	52.95	39.96	45.42	37.93	35.92	42.53	40.54	185.7	185.7	185.7	186	184.9	186	184.9	186	184.9	186	186	184.9	186	184.9	184.9	184.9	186	184.9	0.81	0.81	0.81	0.82	0.83	0.83	0.9	0.87
23	ISF of 4-Chromanone [M+H]+ C9H8O2 NIST 1227936	MS2	-	50.0166	185.66	1.35	0.81	0.66	2.58	1.06	0.68	1.08	0.71	0	0.67	0.69	0.86	0.49	1.08	1.4	1.59	1.41	1.72	185.7	185.7	185.7	186	184.9	186	184.9	186	184.9	186	186	184.9	186	184.9	184.9	184.9	186	184.9	0.81	0.81	0.81	0.82	0.83	0.83	0.9	0.87
24	ISF of L-Methionine [M+H]+ C5H11NO2S NIST 1076064---L-Methionine [M+H]+ C5H11NO2S NIST 1076065	MS1	-	104.052	78.57					4.05	4.08		6.71		13.77	13.59	13.84	34.2	33.53	33.21	56.43	56.91	56.14					78.6	78.6		78.6		78.2	78.2	78.2	78.2	78.2	78.2	78.2	78.2	78.2					0.89	0.76		0.94
24	ISF of L-Methionine [M+H]+ C5H11NO2S NIST 1076064---L-Methionine [M+H]+ C5H11NO2S NIST 1076065	MS2	-	61.0113	78.57					1.39	1.47		2.18		4.19	5.95	4.08	10.34	9.5	10.99	23.22	17.9	16.25					78.6	78.6		78.6		78.2	78.2	78.2	78.2	78.2	78.2	78.2	78.2	78.2					0.89	0.76		0.94
24	ISF of L-Methionine [M+H]+ C5H11NO2S NIST 1076064---L-Methionine [M+H]+ C5H11NO2S NIST 1076065	MS2	-	56.051	78.57					6.16	9.05		9.46		6.31	8	7.7	11.08	11.81	11.08	16.89	21.6	18.3					78.6	78.6		78.6		78.2	78.2	78.2	78.2	78.2	78.2	78.2	78.2	78.2					0.89	0.76		0.94
24	ISF of L-Methionine [M+H]+ C5H11NO2S NIST 1076064---L-Methionine [M+H]+ C5H11NO2S NIST 1076065	MS2	-	104.113	78.57					7.04	0		11.81		3.7	6.55	0	7.16	8.32	9.89	13.46	12.16	13.57					78.6	78.6		78.6		78.2	78.2	78.2	78.2	78.2	78.2	78.2	78.2	78.2					0.89	0.76		0.94
24	ISF of L-Methionine [M+H]+ C5H11NO2S NIST 1076064---L-Methionine [M+H]+ C5H11NO2S NIST 1076065	MS2	-	45.9876	78.57					0	0		0.42		0.45	0.24	0.69	1.61	0.66	1.67	2.48	3.31	2.06					78.6	78.6		78.6		78.2	78.2	78.2	78.2	78.2	78.2	78.2	78.2	78.2					0.89	0.76		0.94
24	ISF of L-Methionine [M+H]+ C5H11NO2S NIST 1076064---L-Methionine [M+H]+ C5H11NO2S NIST 1076065	MS2	-	60.0834	78.57					0	0		5.27		1.33	2.68	2.86	3.43	5.47	3.09	7.63	6.22	6.73					78.6	78.6		78.6		78.2	78.2	78.2	78.2	78.2	78.2	78.2	78.2	78.2					0.89	0.76		0.94
24	ISF of L-Methionine [M+H]+ C5H11NO2S NIST 1076064---L-Methionine [M+H]+ C5H11NO2S NIST 1076065	MS2	-	44.9796	78.57					0.51	0		0.16		0.4	0	0	0.77	0.28	0.58	1.33	0.56	0.95					78.6	78.6		78.6		78.2	78.2	78.2	78.2	78.2	78.2	78.2	78.2	78.2					0.89	0.76		0.94
24	ISF of L-Methionine [M+H]+ C5H11NO2S NIST 1076064---L-Methionine [M+H]+ C5H11NO2S NIST 1076065	MS1	-	133.031	78.57	3.09	2.86	3.54	8.88	9.87	7.41	17.13	19.17	17.57	38	38.13	37.89	93.78	87.62	92.34	157.04	162.83	160.15	78.6	78.6	78.6	78.2	78.2	78.6	78.2	78.2	78.2	78.2	78.2	78.2	78.2	78.2	78.2	78.2	78.2	78.2	0.89	0.94	0.87	0.78	0.93	0.91	0.92	0.86
24	ISF of L-Methionine [M+H]+ C5H11NO2S NIST 1076064---L-Methionine [M+H]+ C5H11NO2S NIST 1076065	MS2	-	87.026	78.57	0.87	0.65	0.84	2.44	1.93	1.93	4.06	2.14	1.51	6.53	5.73	5.66	7.34	4.92	6.66	5.36	6.12	5.39	78.6	78.6	78.6	78.2	78.2	78.6	78.2	78.2	78.2	78.2	78.2	78.2	78.2	78.2	78.2	78.2	78.2	78.2	0.89	0.94	0.87	0.78	0.93	0.91	0.92	0.86
24	ISF of L-Methionine [M+H]+ C5H11NO2S NIST 1076064---L-Methionine [M+H]+ C5H11NO2S NIST 1076065	MS2	-	61.0104	78.57	5.2	6.12	4.81	12.6	12.76	13.89	23.7	30.27	28.21	56.71	55.59	53.09	135.4	131.4	145.19	247.23	239.81	219.56	78.6	78.6	78.6	78.2	78.2	78.6	78.2	78.2	78.2	78.2	78.2	78.2	78.2	78.2	78.2	78.2	78.2	78.2	0.89	0.94	0.87	0.78	0.93	0.91	0.92	0.86
24	ISF of L-Methionine [M+H]+ C5H11NO2S NIST 1076064---L-Methionine [M+H]+ C5H11NO2S NIST 1076065	MS2	-	44.9797	78.57	0.61	0.98	0.42	1.4	1.15	1.49	2.55	2.2	2.99	5.27	3.51	3.98	12.78	10.45	10.36	18.46	19.39	16.1	78.6	78.6	78.6	78.2	78.2	78.6	78.2	78.2	78.2	78.2	78.2	78.2	78.2	78.2	78.2	78.2	78.2	78.2	0.89	0.94	0.87	0.78	0.93	0.91	0.92	0.86
24	ISF of L-Methionine [M+H]+ C5H11NO2S NIST 1076064---L-Methionine [M+H]+ C5H11NO2S NIST 1076065	MS2	-	72.0029	78.57	0	0	0	0	0.24	0	0.41	0.29	0.8	1.45	0.53	1.92	2.95	2.34	3.11	4.82	4.76	4.97	78.6	78.6	78.6	78.2	78.2	78.6	78.2	78.2	78.2	78.2	78.2	78.2	78.2	78.2	78.2	78.2	78.2	78.2	0.89	0.94	0.87	0.78	0.93	0.91	0.92	0.86
24	ISF of L-Methionine [M+H]+ C5H11NO2S NIST 1076064---L-Methionine [M+H]+ C5H11NO2S NIST 1076065	MS2	-	133.031	78.57	1.28	1.41	2.41	4.73	5.21	4.34	10.12	10.42	10.11	21.97	19.77	15.77	42.8	40.57	51.43	88.57	86.92	74.84	78.6	78.6	78.6	78.2	78.2	78.6	78.2	78.2	78.2	78.2	78.2	78.2	78.2	78.2	78.2	78.2	78.2	78.2	0.89	0.94	0.87	0.78	0.93	0.91	0.92	0.86
24	ISF of L-Methionine [M+H]+ C5H11NO2S NIST 1076064---L-Methionine [M+H]+ C5H11NO2S NIST 1076065	MS2	-	58.9949	78.57	0.53	0.93	0.64	0.88	1.07	0.59	0.88	0.78	1.04	2.27	1.9	1.87	3.99	4.34	5.43	6.45	7.55	6.82	78.6	78.6	78.6	78.2	78.2	78.6	78.2	78.2	78.2	78.2	78.2	78.2	78.2	78.2	78.2	78.2	78.2	78.2	0.89	0.94	0.87	0.78	0.93	0.91	0.92	0.86
24	L-Methionine [M+H]+ C5H11NO2S NIST 1076064---L-Methionine [M+H]+ C5H11NO2S NIST 1076065	MS1	M+H	150.057	78.57	7.6	6.65	5.76	14.17	14.22	14.01	26.92	29.76	28.58	54.11	51.78	53.01	118.82	120.65	117.75	206.54	205.56	205.88	78.6	78.6	78.6	78.2	78.2	78.2	78.2	78.2	78.2	78.2	78.2	78.2	78.2	78.2	78.2	78.2	78.2	78.2	0.98	0.98	0.95	0.97	0.99	0.99	0.98	1
24	L-Methionine [M+H]+ C5H11NO2S NIST 1076064---L-Methionine [M+H]+ C5H11NO2S NIST 1076065	MS2	M+H	56.0496	78.57	12.49	11.77	13.34	14.75	18.31	18.39	29.69	30.39	32.28	61.24	57.54	60.52	145.41	144.75	153.93	268.87	247.11	241.01	78.6	78.6	78.6	78.2	78.2	78.2	78.2	78.2	78.2	78.2	78.2	78.2	78.2	78.2	78.2	78.2	78.2	78.2	0.98	0.98	0.95	0.97	0.99	0.99	0.98	1
24	L-Methionine [M+H]+ C5H11NO2S NIST 1076064---L-Methionine [M+H]+ C5H11NO2S NIST 1076065	MS2	M+H	61.0107	78.57	5.2	6.12	4.81	12.71	12.76	13.84	23.7	29.99	28.21	56.71	55.59	53.09	135.4	131.4	145.19	247.23	239.81	219.56	78.6	78.6	78.6	78.2	78.2	78.2	78.2	78.2	78.2	78.2	78.2	78.2	78.2	78.2	78.2	78.2	78.2	78.2	0.98	0.98	0.95	0.97	0.99	0.99	0.98	1
24	L-Methionine [M+H]+ C5H11NO2S NIST 1076064---L-Methionine [M+H]+ C5H11NO2S NIST 1076065	MS2	M+H	104.053	78.57	3.66	2.52	4.45	5.65	5.22	5.16	10.1	13.11	11.6	25.31	21.24	19.82	45.12	41.75	53.62	106.58	90.34	82.64	78.6	78.6	78.6	78.2	78.2	78.2	78.2	78.2	78.2	78.2	78.2	78.2	78.2	78.2	78.2	78.2	78.2	78.2	0.98	0.98	0.95	0.97	0.99	0.99	0.98	1
24	L-Methionine [M+H]+ C5H11NO2S NIST 1076064---L-Methionine [M+H]+ C5H11NO2S NIST 1076065	MS2	M+H	133.031	78.57	1.28	1.41	2.41	4.73	5.21	4.3	10.12	10.42	10.11	21.97	19.77	15.77	42.8	40.57	51.43	88.57	86.92	74.84	78.6	78.6	78.6	78.2	78.2	78.2	78.2	78.2	78.2	78.2	78.2	78.2	78.2	78.2	78.2	78.2	78.2	78.2	0.98	0.98	0.95	0.97	0.99	0.99	0.98	1
24	L-Methionine [M+H]+ C5H11NO2S NIST 1076064---L-Methionine [M+H]+ C5H11NO2S NIST 1076065	MS2	M+H	102.055	78.57	0.42	0.63	1.65	2	1.3	1.79	4.75	4.15	4.4	7.99	7.91	8.55	19.63	18.86	18.8	31.17	31.13	29.22	78.6	78.6	78.6	78.2	78.2	78.2	78.2	78.2	78.2	78.2	78.2	78.2	78.2	78.2	78.2	78.2	78.2	78.2	0.98	0.98	0.95	0.97	0.99	0.99	0.98	1
24	L-Methionine [M+H]+ C5H11NO2S NIST 1076064---L-Methionine [M+H]+ C5H11NO2S NIST 1076065	MS2	M+H	87.0264	78.57	0.87	0.65	0.84	2.44	1.93	1.93	4.06	2.14	1.51	6.53	5.73	5.66	7.34	4.92	6.66	5.36	6.12	5.39	78.6	78.6	78.6	78.2	78.2	78.2	78.2	78.2	78.2	78.2	78.2	78.2	78.2	78.2	78.2	78.2	78.2	78.2	0.98	0.98	0.95	0.97	0.99	0.99	0.98	1
25	2-Hydroxybenzothiazole C7H5NOS	MS1	M+H	152.015	524.37		1.13			1.92	2.59		2.43			4.38	3.38	7.5	7.31	6.77	13.82	13.26	16.12		524.4			524.4	524.4		524.4			524.4	524.4	524.8	524.8	524.8	524.8	524.8	524.8		0.78			0.85	0.77		0.84
25	2-Hydroxybenzothiazole C7H5NOS	MS2	M+H	152.017	524.37		2.36			2.32	0.9		4.64			3.99	3.69	7.63	7.72	6.76	10.13	11.42	14.54		524.4			524.4	524.4		524.4			524.4	524.4	524.8	524.8	524.8	524.8	524.8	524.8		0.78			0.85	0.77		0.84
25	2-Hydroxybenzothiazole C7H5NOS	MS2	M+H	152.143	524.37		52.37			53.07	49.41		47.62			51.37	51.67	15.61	19.45	13.55	15.16	15.5	12.38		524.4			524.4	524.4		524.4			524.4	524.4	524.8	524.8	524.8	524.8	524.8	524.8		0.78			0.85	0.77		0.84
25	2-Hydroxybenzothiazole C7H5NOS	MS2	M+H	122.096	524.37		51.26			51.67	50.05		53.95			53.37	53.87	14.26	16.36	15.75	14.51	12.66	15.69		524.4			524.4	524.4		524.4			524.4	524.4	524.8	524.8	524.8	524.8	524.8	524.8		0.78			0.85	0.77		0.84
25	2-Hydroxybenzothiazole C7H5NOS	MS2	M+H	124.022	524.37		0			1.55	0		0.58			0.51	1.55	1.2	1.86	1.7	2.6	3.49	4.54		524.4			524.4	524.4		524.4			524.4	524.4	524.8	524.8	524.8	524.8	524.8	524.8		0.78			0.85	0.77		0.84
25	2-Hydroxybenzothiazole C7H5NOS	MS2	M+H	108.081	524.37		73.74			70.12	72.5		73.79			75.2	84.18	31.55	33.77	31.26	39.02	46.46	51.37		524.4			524.4	524.4		524.4			524.4	524.4	524.8	524.8	524.8	524.8	524.8	524.8		0.78			0.85	0.77		0.84
25	2-Hydroxybenzothiazole C7H5NOS	MS2	M+H	80.0499	524.37		15.68			15.08	18.12		22			19.2	21.38	6.38	6.9	6.4	7.64	9.27	8.41		524.4			524.4	524.4		524.4			524.4	524.4	524.8	524.8	524.8	524.8	524.8	524.8		0.78			0.85	0.77		0.84
26	Guanine C5H5N5O	MS1	M+H	152.056	95.04	4.94	4.96		5.95	4.5	5.07	7.12	7.85	6.63	8.57	10.19	12.69	13.6	15.67	13.85	23.03	25.88	24.24	95	95		95	95	95	95	95	95	94.7	95	95	94.7	94.7	95.8	94.7	95.8	94.7	0.87	0.81		0.78	0.76	0.75	0.71	0.75
26	Guanine C5H5N5O	MS2	M+H	135.031	95.04	1.34	2.74		1.86	3.24	4.56	4.85	4.33	4.21	5.99	10.31	5.53	9.21	11.62	10.4	13.3	16.05	16.1	95	95		95	95	95	95	95	95	94.7	95	95	94.7	94.7	95.8	94.7	95.8	94.7	0.87	0.81		0.78	0.76	0.75	0.71	0.75
26	Guanine C5H5N5O	MS2	M+H	110.034	95.04	27.58	27.98		73.7	74.06	79.56	151.59	152.43	151.41	277.94	257.94	272.35	515.62	554.28	529.04	792.53	862.67	826.82	95	95		95	95	95	95	95	95	94.7	95	95	94.7	94.7	95.8	94.7	95.8	94.7	0.87	0.81		0.78	0.76	0.75	0.71	0.75
26	Guanine C5H5N5O	MS2	M+H	152.056	95.04	1.07	0.43		2.7	2.06	1.97	1.55	2.96	2.31	3.73	3.86	3.82	5.67	4.38	5.84	9.74	7.43	7.26	95	95		95	95	95	95	95	95	94.7	95	95	94.7	94.7	95.8	94.7	95.8	94.7	0.87	0.81		0.78	0.76	0.75	0.71	0.75
26	Guanine C5H5N5O	MS2	M+H	152.017	95.04	9.51	9.35		8.24	10.2	4.8	6.51	9.67	4.63	5.02	6.94	6.16	3.05	7.45	3.3	2.14	0	3.27	95	95		95	95	95	95	95	95	94.7	95	95	94.7	94.7	95.8	94.7	95.8	94.7	0.87	0.81		0.78	0.76	0.75	0.71	0.75
26	Guanine C5H5N5O	MS2	M+H	66.933	95.04	7.87	8.07		9.89	8.7	8.98	7.93	8.47	8.67	6.37	6.52	7.57	3.48	5.69	2.05	2.48	6.27	3.16	95	95		95	95	95	95	95	95	94.7	95	95	94.7	94.7	95.8	94.7	95.8	94.7	0.87	0.81		0.78	0.76	0.75	0.71	0.75
26	Guanine C5H5N5O	MS2	M+H	65.0118	95.04	0.5	0.64		1.49	1.82	1.46	2.44	3.67	3.29	5.16	5.47	6.12	8.38	12.3	9.12	16.4	16.5	18.02	95	95		95	95	95	95	95	95	94.7	95	95	94.7	94.7	95.8	94.7	95.8	94.7	0.87	0.81		0.78	0.76	0.75	0.71	0.75
27	ISF of Xanthine [M+H]+ C5H4N4O2 NIST 1061004---Xanthine [M+H]+ C5H4N4O2 NIST 1061009	MS1	-	110.034	97.54							7.74	7.99	7.65	15.53	14.28	14.86	32.54	29.46	31.9	52.63	52.35	53.04							96.9	96.9	96.9	96.9	96.9	96.9	98	96.9	96.9	96.9	98	96.9							0.75	0.79
27	ISF of Xanthine [M+H]+ C5H4N4O2 NIST 1061004---Xanthine [M+H]+ C5H4N4O2 NIST 1061009	MS2	-	60.988	97.54							8.68	8.08	10.17	9.39	8.78	7.9	10.66	10.78	11.35	9.53	7.69	10.65							96.9	96.9	96.9	96.9	96.9	96.9	98	96.9	96.9	96.9	98	96.9							0.75	0.79
27	ISF of Xanthine [M+H]+ C5H4N4O2 NIST 1061004---Xanthine [M+H]+ C5H4N4O2 NIST 1061009	MS2	-	82.0468	97.54							0	0.19	0	0	0	0.5	0.69	0.72	0	1.8	1.97	2.9							96.9	96.9	96.9	96.9	96.9	96.9	98	96.9	96.9	96.9	98	96.9							0.75	0.79
27	ISF of Xanthine [M+H]+ C5H4N4O2 NIST 1061004---Xanthine [M+H]+ C5H4N4O2 NIST 1061009	MS2	-	68.98	97.54							6.59	5.33	5.84	5.81	6.48	6.39	8.96	7.73	7.82	9.17	6.95	5.34							96.9	96.9	96.9	96.9	96.9	96.9	98	96.9	96.9	96.9	98	96.9							0.75	0.79
27	ISF of Xanthine [M+H]+ C5H4N4O2 NIST 1061004---Xanthine [M+H]+ C5H4N4O2 NIST 1061009	MS2	-	55.0569	97.54							18.95	17.88	20.03	19.88	19.91	19.96	22.79	23.4	23.98	25.3	22.3	21.16							96.9	96.9	96.9	96.9	96.9	96.9	98	96.9	96.9	96.9	98	96.9							0.75	0.79
27	ISF of Xanthine [M+H]+ C5H4N4O2 NIST 1061004---Xanthine [M+H]+ C5H4N4O2 NIST 1061009	MS2	-	110.086	97.54							0.07	0	0	0	0	0	0	0	0	0	0	0.29							96.9	96.9	96.9	96.9	96.9	96.9	98	96.9	96.9	96.9	98	96.9							0.75	0.79
27	ISF of Xanthine [M+H]+ C5H4N4O2 NIST 1061004---Xanthine [M+H]+ C5H4N4O2 NIST 1061009	MS2	-	110.033	97.54							0	0	0	0.51	0	0	0.77	0.99	0	0.36	0.73	0.66							96.9	96.9	96.9	96.9	96.9	96.9	98	96.9	96.9	96.9	98	96.9							0.75	0.79
27	Xanthine [M+H]+ C5H4N4O2 NIST 1061004---Xanthine [M+H]+ C5H4N4O2 NIST 1061009	MS1	M+H	153.04	98.81	13.09	9.98	11.71	26.26	26.04	28.87	55.63	56.48	55.87	98.92	97.83	94.96	219.75	232.6	228.98	400.28	431.04	395.65	98	98	98	98	98	98	98	98	98	98	98	98	99.1	98	98	98	98	98	0.97	0.97	0.94	0.97	1	0.99	0.98	0.99
27	Xanthine [M+H]+ C5H4N4O2 NIST 1061004---Xanthine [M+H]+ C5H4N4O2 NIST 1061009	MS2	M+H	110.035	98.81	27.07	25.31	28.78	71.94	66.83	71.49	137.08	135.72	146.92	273.94	233.71	246.14	524.38	505.42	523.5	793.32	845.38	821.7	98	98	98	98	98	98	98	98	98	98	98	98	99.1	98	98	98	98	98	0.97	0.97	0.94	0.97	1	0.99	0.98	0.99
27	Xanthine [M+H]+ C5H4N4O2 NIST 1061004---Xanthine [M+H]+ C5H4N4O2 NIST 1061009	MS2	M+H	136.014	98.81	100.19	73.49	81.73	110.79	76.18	84.57	97.78	111.83	105.36	147.94	135.28	127.15	220.21	216.47	243.17	328.14	356.95	335.55	98	98	98	98	98	98	98	98	98	98	98	98	99.1	98	98	98	98	98	0.97	0.97	0.94	0.97	1	0.99	0.98	0.99
27	Xanthine [M+H]+ C5H4N4O2 NIST 1061004---Xanthine [M+H]+ C5H4N4O2 NIST 1061009	MS2	M+H	153.04	98.81	4.45	5.13	3.41	6.68	11.18	9.67	16.33	32.05	14.27	39.52	38.01	33.62	85.71	113.4	113	164.25	160.44	191.18	98	98	98	98	98	98	98	98	98	98	98	98	99.1	98	98	98	98	98	0.97	0.97	0.94	0.97	1	0.99	0.98	0.99
27	Xanthine [M+H]+ C5H4N4O2 NIST 1061004---Xanthine [M+H]+ C5H4N4O2 NIST 1061009	MS2	M+H	55.0292	98.81	5.31	5.27	5.03	12.8	16	15.07	29.68	27.19	37.61	66.21	60.44	58.27	112.72	126.66	130.83	199.27	221.71	196.53	98	98	98	98	98	98	98	98	98	98	98	98	99.1	98	98	98	98	98	0.97	0.97	0.94	0.97	1	0.99	0.98	0.99
27	Xanthine [M+H]+ C5H4N4O2 NIST 1061004---Xanthine [M+H]+ C5H4N4O2 NIST 1061009	MS2	M+H	82.0398	98.81	6.05	6.73	4.89	10.88	12.18	11.23	20.18	22.54	27.86	55.7	45.35	38.25	102.87	86.12	101.67	158.38	162.09	149.34	98	98	98	98	98	98	98	98	98	98	98	98	99.1	98	98	98	98	98	0.97	0.97	0.94	0.97	1	0.99	0.98	0.99
27	Xanthine [M+H]+ C5H4N4O2 NIST 1061004---Xanthine [M+H]+ C5H4N4O2 NIST 1061009	MS2	M+H	81.008	98.81	0.76	0.72	0	1.85	2.63	1.41	1.76	2.61	3.54	6.09	4.99	5.8	13.36	10.81	10.14	25.49	24.41	23.37	98	98	98	98	98	98	98	98	98	98	98	98	99.1	98	98	98	98	98	0.97	0.97	0.94	0.97	1	0.99	0.98	0.99
28	1,4-Diaminonaphthalene [M+H]+ C10H10N2 NIST 1066597---1,4-Diaminonaphthalene [M+H]+ C10H10N2 NIST 1066598---1,5-Diaminonaphthalene [M+H]+ C10H10N2 NIST 1064443	MS1	M+H	159.09	362.04		1.4		1.45	2.14	1.8	1.88	1.72	1.94	3.35	4.44	3.38	8.53	7.98	6.33	12.09	10.89	11.92		362		362	362	362	362	362	362	362	362	362	363.1	362	362	362	362	362		0.78		0.79	0.77	0.83	0.78	0.78
28	1,4-Diaminonaphthalene [M+H]+ C10H10N2 NIST 1066597---1,4-Diaminonaphthalene [M+H]+ C10H10N2 NIST 1066598---1,5-Diaminonaphthalene [M+H]+ C10H10N2 NIST 1064443	MS2	M+H	132.083	362.04		1.56		2.19	0.76	1.72	3.44	3.76	3.92	5.2	4.47	6.12	9.97	8.56	9.35	18.36	17.47	16.05		362		362	362	362	362	362	362	362	362	362	363.1	362	362	362	362	362		0.78		0.79	0.77	0.83	0.78	0.78
28	1,4-Diaminonaphthalene [M+H]+ C10H10N2 NIST 1066597---1,4-Diaminonaphthalene [M+H]+ C10H10N2 NIST 1066598---1,5-Diaminonaphthalene [M+H]+ C10H10N2 NIST 1064443	MS2	M+H	117.06	362.04		17.84		44.74	35.7	49	75.51	80.12	77.6	213.19	206.29	197.96	582.17	587.99	560	1018.11	1095.95	1160.2		362		362	362	362	362	362	362	362	362	362	363.1	362	362	362	362	362		0.78		0.79	0.77	0.83	0.78	0.78
28	1,4-Diaminonaphthalene [M+H]+ C10H10N2 NIST 1066597---1,4-Diaminonaphthalene [M+H]+ C10H10N2 NIST 1066598---1,5-Diaminonaphthalene [M+H]+ C10H10N2 NIST 1064443	MS2	M+H	130.066	362.04		10.45		17.39	16.54	15.6	19.91	23.09	18.81	27.96	24.67	27.86	33.62	34.3	35.37	43.79	41.11	41.2		362		362	362	362	362	362	362	362	362	362	363.1	362	362	362	362	362		0.78		0.79	0.77	0.83	0.78	0.78
28	1,4-Diaminonaphthalene [M+H]+ C10H10N2 NIST 1066597---1,4-Diaminonaphthalene [M+H]+ C10H10N2 NIST 1066598---1,5-Diaminonaphthalene [M+H]+ C10H10N2 NIST 1064443	MS2	M+H	115.054	362.04		26.21		62.01	56.19	49.55	111.58	122.41	106.32	208.79	227.09	226.81	528.72	540.66	514.25	929.94	1000.53	1043.09		362		362	362	362	362	362	362	362	362	362	363.1	362	362	362	362	362		0.78		0.79	0.77	0.83	0.78	0.78
28	1,4-Diaminonaphthalene [M+H]+ C10H10N2 NIST 1066597---1,4-Diaminonaphthalene [M+H]+ C10H10N2 NIST 1066598---1,5-Diaminonaphthalene [M+H]+ C10H10N2 NIST 1064443	MS2	M+H	159.094	362.04		0		0	0	1.1	0	0	0	1.26	0.88	1.23	1.72	2.2	1.23	4.87	2.76	2.59		362		362	362	362	362	362	362	362	362	362	363.1	362	362	362	362	362		0.78		0.79	0.77	0.83	0.78	0.78
28	1,4-Diaminonaphthalene [M+H]+ C10H10N2 NIST 1066597---1,4-Diaminonaphthalene [M+H]+ C10H10N2 NIST 1066598---1,5-Diaminonaphthalene [M+H]+ C10H10N2 NIST 1064443	MS2	M+H	43.0183	362.04		81.11		70.12	79.75	75.8	77.43	74.03	83.92	76.08	81.75	79.53	72.34	70.82	75.32	74.03	45.68	54.7		362		362	362	362	362	362	362	362	362	362	363.1	362	362	362	362	362		0.78		0.79	0.77	0.83	0.78	0.78
28	ISF of 1,4-Diaminonaphthalene [M+H]+ C10H10N2 NIST 1066597---1,4-Diaminonaphthalene [M+H]+ C10H10N2 NIST 1066598---1,5-Diaminonaphthalene [M+H]+ C10H10N2 NIST 1064443	MS1	-	132.08	360.68		0.94	0.74	1.99	1.47	1.89	2.71	2.92	3.6	5.77	5.18	4.67	11	12.03	12.49	19.29	19.55	19.43		360.7	360.7	360.7	360.7	360.7	360.7	360.7	360.7	360.7	360.7	360.7	360.9	360.7	362	362	360.9	360.9		0.92	0.83	0.83	0.81	0.89	0.82	0.82
28	ISF of 1,4-Diaminonaphthalene [M+H]+ C10H10N2 NIST 1066597---1,4-Diaminonaphthalene [M+H]+ C10H10N2 NIST 1066598---1,5-Diaminonaphthalene [M+H]+ C10H10N2 NIST 1064443	MS2	-	117.056	360.68		10.88	5.86	15.02	13.5	30.55	38.38	41.98	44.4	48.67	119.67	36.69	421.96	147.3	282.69	228.08	650.63	502.2		360.7	360.7	360.7	360.7	360.7	360.7	360.7	360.7	360.7	360.7	360.7	360.9	360.7	362	362	360.9	360.9		0.92	0.83	0.83	0.81	0.89	0.82	0.82
28	ISF of 1,4-Diaminonaphthalene [M+H]+ C10H10N2 NIST 1066597---1,4-Diaminonaphthalene [M+H]+ C10H10N2 NIST 1066598---1,5-Diaminonaphthalene [M+H]+ C10H10N2 NIST 1064443	MS2	-	132.082	360.68		1.56	1.44	1.91	0.92	1.72	3.44	3.76	4.03	5.2	4.47	6.12	9.51	8.56	7.83	17.33	16.27	15.53		360.7	360.7	360.7	360.7	360.7	360.7	360.7	360.7	360.7	360.7	360.7	360.9	360.7	362	362	360.9	360.9		0.92	0.83	0.83	0.81	0.89	0.82	0.82
28	ISF of 1,4-Diaminonaphthalene [M+H]+ C10H10N2 NIST 1066597---1,4-Diaminonaphthalene [M+H]+ C10H10N2 NIST 1066598---1,5-Diaminonaphthalene [M+H]+ C10H10N2 NIST 1064443	MS2	-	115.055	360.68		25.52	23.54	61.43	56.01	49.16	111.02	121.72	106.37	208.42	226.46	226.49	505.24	538.28	481.69	893.18	958.17	1026.99		360.7	360.7	360.7	360.7	360.7	360.7	360.7	360.7	360.7	360.7	360.7	360.9	360.7	362	362	360.9	360.9		0.92	0.83	0.83	0.81	0.89	0.82	0.82
28	ISF of 1,4-Diaminonaphthalene [M+H]+ C10H10N2 NIST 1066597---1,4-Diaminonaphthalene [M+H]+ C10H10N2 NIST 1066598---1,5-Diaminonaphthalene [M+H]+ C10H10N2 NIST 1064443	MS2	-	131.07	360.68		1.31	2.75	2.35	0.95	2.55	3.38	4.62	2.59	4.74	6.22	3.38	5.81	7.96	6.03	8.16	6.01	7.47		360.7	360.7	360.7	360.7	360.7	360.7	360.7	360.7	360.7	360.7	360.7	360.9	360.7	362	362	360.9	360.9		0.92	0.83	0.83	0.81	0.89	0.82	0.82
28	ISF of 1,4-Diaminonaphthalene [M+H]+ C10H10N2 NIST 1066597---1,4-Diaminonaphthalene [M+H]+ C10H10N2 NIST 1066598---1,5-Diaminonaphthalene [M+H]+ C10H10N2 NIST 1064443	MS2	-	103.054	360.68		8.9	8.83	11.35	15.24	12.28	15.17	16.48	14.54	22.64	26.56	22.73	43.45	51.25	39.47	74.19	73.92	83.83		360.7	360.7	360.7	360.7	360.7	360.7	360.7	360.7	360.7	360.7	360.7	360.9	360.7	362	362	360.9	360.9		0.92	0.83	0.83	0.81	0.89	0.82	0.82
28	ISF of 1,4-Diaminonaphthalene [M+H]+ C10H10N2 NIST 1066597---1,4-Diaminonaphthalene [M+H]+ C10H10N2 NIST 1066598---1,5-Diaminonaphthalene [M+H]+ C10H10N2 NIST 1064443	MS2	-	130.067	360.68		10.25	9.93	17.27	16.24	15.61	20.19	22.97	18.85	27.82	24.55	27.62	27.82	34.2	25.34	36.82	36.01	38.46		360.7	360.7	360.7	360.7	360.7	360.7	360.7	360.7	360.7	360.7	360.7	360.9	360.7	362	362	360.9	360.9		0.92	0.83	0.83	0.81	0.89	0.82	0.82
29	Indoleacetaldehyde C10H9NO MoNA 448019	MS1	M+H	160.075	250.86	1.36			4.14	4.21	5.67	9.82	9.1	6.01	15.59	12.17	18.15	38.78	38.83	66.4	176.16	177.29	115.86	250.9			250.9	250.9	250.9	250.9	250.9	257.5	250.9	257.5	255.3	250.9	250.9	252	252	252	253.1	0.78			0.95	0.83	0.89	0.91	0.91
29	Indoleacetaldehyde C10H9NO MoNA 448019	MS2	M+H	160.076	250.86	2.24			7.97	10.53	9.13	12.87	13.84	7.1	21.54	12.98	25	43.57	47.13	60.56	173.7	184.88	124.18	250.9			250.9	250.9	250.9	250.9	250.9	257.5	250.9	257.5	255.3	250.9	250.9	252	252	252	253.1	0.78			0.95	0.83	0.89	0.91	0.91
29	Indoleacetaldehyde C10H9NO MoNA 448019	MS2	M+H	115.055	250.86	14.6			15.67	16.89	17	17.98	16.01	9.52	17.24	14.48	24.14	21.12	28.91	47.41	89.76	98.55	71.07	250.9			250.9	250.9	250.9	250.9	250.9	257.5	250.9	257.5	255.3	250.9	250.9	252	252	252	253.1	0.78			0.95	0.83	0.89	0.91	0.91
29	Indoleacetaldehyde C10H9NO MoNA 448019	MS2	M+H	117.059	250.86	6.83			6.53	0	5.37	10.34	10.03	4.27	9.58	8	13.6	17.67	17.53	31.77	60.7	66.49	41.96	250.9			250.9	250.9	250.9	250.9	250.9	257.5	250.9	257.5	255.3	250.9	250.9	252	252	252	253.1	0.78			0.95	0.83	0.89	0.91	0.91
29	Indoleacetaldehyde C10H9NO MoNA 448019	MS2	M+H	97.971	250.86	22.41			23.12	24.51	24.72	23.53	24.67	11.78	21.35	17.24	27.87	22.79	25.11	39.43	57.98	49.81	41.29	250.9			250.9	250.9	250.9	250.9	250.9	257.5	250.9	257.5	255.3	250.9	250.9	252	252	252	253.1	0.78			0.95	0.83	0.89	0.91	0.91
29	Indoleacetaldehyde C10H9NO MoNA 448019	MS2	M+H	132.079	250.86	5.36			5.75	5.97	6.93	10.85	7.12	6.02	9.32	8.62	12	21.26	22.11	31.99	69.03	68.09	46.58	250.9			250.9	250.9	250.9	250.9	250.9	257.5	250.9	257.5	255.3	250.9	250.9	252	252	252	253.1	0.78			0.95	0.83	0.89	0.91	0.91
29	Indoleacetaldehyde C10H9NO MoNA 448019	MS2	M+H	131.067	250.86	0			0.64	1.35	0	0	0	1.03	0	1.55	0	2.34	0	4.79	14.33	7.21	7.38	250.9			250.9	250.9	250.9	250.9	250.9	257.5	250.9	257.5	255.3	250.9	250.9	252	252	252	253.1	0.78			0.95	0.83	0.89	0.91	0.91
30	ISF of Tryptamine [M+H-NH3]+ C10H12N2 NIST 1065667---Tryptamine [M+H]+ C10H12N2 NIST 1065657	MS1	-	117.069	360.9	6.29	5.34	4.95	5.4	6.71	5.77	7.91	8.44	8.88	9.96	10.44	10.7	20.18	20.61	18.39	32.75	36.21	31.89	360.9	360.9	360.9	360.9	360.9	360.9	360.9	360.9	360.9	362	360.9	360.9	360.9	360.9	360.9	360.9	360.9	360.9	0.67	0.67	0.68	0.67	0.68	0.7	0.7	0.69
30	ISF of Tryptamine [M+H-NH3]+ C10H12N2 NIST 1065667---Tryptamine [M+H]+ C10H12N2 NIST 1065657	MS2	-	43.0193	360.9	302.08	314.77	326.97	306.81	316.21	328.86	301.11	341.29	309.04	216.63	228.92	298.42	182.48	194.45	181.06	180.02	186.84	202.52	360.9	360.9	360.9	360.9	360.9	360.9	360.9	360.9	360.9	362	360.9	360.9	360.9	360.9	360.9	360.9	360.9	360.9	0.67	0.67	0.68	0.67	0.68	0.7	0.7	0.69
30	ISF of Tryptamine [M+H-NH3]+ C10H12N2 NIST 1065667---Tryptamine [M+H]+ C10H12N2 NIST 1065657	MS2	-	117.057	360.9	0	0	0	0	0	0	0	0	0	0	0	0	0	0.19	0.9	0	0.98	0.75	360.9	360.9	360.9	360.9	360.9	360.9	360.9	360.9	360.9	362	360.9	360.9	360.9	360.9	360.9	360.9	360.9	360.9	0.67	0.67	0.68	0.67	0.68	0.7	0.7	0.69
30	ISF of Tryptamine [M+H-NH3]+ C10H12N2 NIST 1065667---Tryptamine [M+H]+ C10H12N2 NIST 1065657	MS2	-	117.069	360.9	0	0	0	0	0	0.3	0.38	0.68	0	0	0.3	0.38	0.38	0.34	0.9	1.17	0.98	0.98	360.9	360.9	360.9	360.9	360.9	360.9	360.9	360.9	360.9	362	360.9	360.9	360.9	360.9	360.9	360.9	360.9	360.9	0.67	0.67	0.68	0.67	0.68	0.7	0.7	0.69
30	ISF of Tryptamine [M+H-NH3]+ C10H12N2 NIST 1065667---Tryptamine [M+H]+ C10H12N2 NIST 1065657	MS2	-	81.0704	360.9	10.36	11.1	15.65	12.66	11.17	14.5	12.2	11.14	13.35	7.98	8.32	12.28	6.5	6.69	7.69	5.64	6.64	6.83	360.9	360.9	360.9	360.9	360.9	360.9	360.9	360.9	360.9	362	360.9	360.9	360.9	360.9	360.9	360.9	360.9	360.9	0.67	0.67	0.68	0.67	0.68	0.7	0.7	0.69
30	ISF of Tryptamine [M+H-NH3]+ C10H12N2 NIST 1065667---Tryptamine [M+H]+ C10H12N2 NIST 1065657	MS2	-	89.0394	360.9	0	0	0	0	0	0	0	0	0.75	0	0	0	0.76	0	0.56	0.92	0.36	1.31	360.9	360.9	360.9	360.9	360.9	360.9	360.9	360.9	360.9	362	360.9	360.9	360.9	360.9	360.9	360.9	360.9	360.9	0.67	0.67	0.68	0.67	0.68	0.7	0.7	0.69
30	ISF of Tryptamine [M+H-NH3]+ C10H12N2 NIST 1065667---Tryptamine [M+H]+ C10H12N2 NIST 1065657	MS2	-	41.0403	360.9	117.65	128.63	130.07	119.64	123.42	131.19	125.64	131.45	125.85	84.39	91.65	126.3	80.71	72.89	75.59	71.29	73.16	79.07	360.9	360.9	360.9	360.9	360.9	360.9	360.9	360.9	360.9	362	360.9	360.9	360.9	360.9	360.9	360.9	360.9	360.9	0.67	0.67	0.68	0.67	0.68	0.7	0.7	0.69
30	ISF of Tryptamine [M+H-NH3]+ C10H12N2 NIST 1065667---Tryptamine [M+H]+ C10H12N2 NIST 1065657	MS1	-	144.08	360.68	80.13	78.4	74.55	201.83	194.55	194.74	388.63	380.73	404.36	732.81	725.16	691.1	1678.98	1658.69	1659.16	3124.79	3123.15	3200.84	362	362	362	362	362	362	362	362	362	362	362	360.9	360.9	360.9	362	360.9	360.9	360.9	0.99	0.98	0.98	0.99	0.99	1	1	0.99
30	ISF of Tryptamine [M+H-NH3]+ C10H12N2 NIST 1065667---Tryptamine [M+H]+ C10H12N2 NIST 1065657	MS2	-	144.082	360.68	62.64	72.03	65.36	171.24	173.29	175.33	387.85	407.98	397.26	754.18	757.51	720.19	1605.96	1745.94	1675.84	3468.05	3062.62	3288.91	362	362	362	362	362	362	362	362	362	362	362	360.9	360.9	360.9	362	360.9	360.9	360.9	0.99	0.98	0.98	0.99	0.99	1	1	0.99
30	ISF of Tryptamine [M+H-NH3]+ C10H12N2 NIST 1065667---Tryptamine [M+H]+ C10H12N2 NIST 1065657	MS2	-	115.054	360.68	20.43	22.42	19.47	56.9	51.87	45.1	105.07	115.58	100.62	198.48	215.84	215.84	490.52	499.99	495.82	856.04	958.17	996.26	362	362	362	362	362	362	362	362	362	362	362	360.9	360.9	360.9	362	360.9	360.9	360.9	0.99	0.98	0.98	0.99	0.99	1	1	0.99
30	ISF of Tryptamine [M+H-NH3]+ C10H12N2 NIST 1065667---Tryptamine [M+H]+ C10H12N2 NIST 1065657	MS2	-	143.074	360.68	24.26	20.91	23.79	63.02	57.6	61.59	118.16	132.32	130.41	242.71	253.41	244.39	595.81	600.86	599.77	1028.83	1130.3	1167.98	362	362	362	362	362	362	362	362	362	362	362	360.9	360.9	360.9	362	360.9	360.9	360.9	0.99	0.98	0.98	0.99	0.99	1	1	0.99
30	ISF of Tryptamine [M+H-NH3]+ C10H12N2 NIST 1065667---Tryptamine [M+H]+ C10H12N2 NIST 1065657	MS2	-	117.066	360.68	16.35	17.85	19.08	42.71	38.22	45.8	72.78	79.31	77.88	207.33	200.93	192.22	553.69	559.7	541.91	957.33	1058.27	1117.29	362	362	362	362	362	362	362	362	362	362	362	360.9	360.9	360.9	362	360.9	360.9	360.9	0.99	0.98	0.98	0.99	0.99	1	1	0.99
30	ISF of Tryptamine [M+H-NH3]+ C10H12N2 NIST 1065667---Tryptamine [M+H]+ C10H12N2 NIST 1065657	MS2	-	91.0541	360.68	46.27	46.31	44.01	63.8	54.47	58.23	85.09	83.15	81.49	125.96	130.31	139.93	259.23	242.52	254.13	400.7	441.62	476.35	362	362	362	362	362	362	362	362	362	362	362	360.9	360.9	360.9	362	360.9	360.9	360.9	0.99	0.98	0.98	0.99	0.99	1	1	0.99
30	ISF of Tryptamine [M+H-NH3]+ C10H12N2 NIST 1065667---Tryptamine [M+H]+ C10H12N2 NIST 1065657	MS2	-	127.055	360.68	9.86	12.15	10.01	25.66	28.42	24.69	51.51	54.73	51.96	113.89	110.64	117.5	280.49	269.63	275.29	489.49	515.36	534.85	362	362	362	362	362	362	362	362	362	362	362	360.9	360.9	360.9	362	360.9	360.9	360.9	0.99	0.98	0.98	0.99	0.99	1	1	0.99
30	ISF of Tryptamine [M+H-NH3]+ C10H12N2 NIST 1065667---Tryptamine [M+H]+ C10H12N2 NIST 1065657	MS1	-	115.053	360.58	2.49	2.1	1.86	4.18	3.26	3.16	5.01	4.91	5.48	8.02	6.64	8.96	17.21	17.76	15.88	34.49	33.21	33.02	360.6	360.6	360.6	360.6	360.6	360.6	360.6	360.6	360.6	362	359.8	360.6	360.9	360.9	360.9	360.9	360.9	360.9	0.76	0.86	0.83	0.82	0.87	0.88	0.89	0.85
30	ISF of Tryptamine [M+H-NH3]+ C10H12N2 NIST 1065667---Tryptamine [M+H]+ C10H12N2 NIST 1065657	MS2	-	115.054	360.58	0	0.37	0.63	0.82	2.01	2.31	1.79	1.12	1.3	1.23	0	0.97	2.21	2.84	2.73	3.77	2.95	4.49	360.6	360.6	360.6	360.6	360.6	360.6	360.6	360.6	360.6	362	359.8	360.6	360.9	360.9	360.9	360.9	360.9	360.9	0.76	0.86	0.83	0.82	0.87	0.88	0.89	0.85
30	ISF of Tryptamine [M+H-NH3]+ C10H12N2 NIST 1065667---Tryptamine [M+H]+ C10H12N2 NIST 1065657	MS2	-	45.0342	360.58	25.83	23.71	26.29	22.69	26.13	25.82	27.08	26.55	23.65	13.05	16.54	26.6	10.76	11.23	11.03	12.45	15.55	17.81	360.6	360.6	360.6	360.6	360.6	360.6	360.6	360.6	360.6	362	359.8	360.6	360.9	360.9	360.9	360.9	360.9	360.9	0.76	0.86	0.83	0.82	0.87	0.88	0.89	0.85
30	ISF of Tryptamine [M+H-NH3]+ C10H12N2 NIST 1065667---Tryptamine [M+H]+ C10H12N2 NIST 1065657	MS2	-	41.0398	360.58	117.65	128.63	130.07	119.64	123.42	131.19	125.64	131.45	125.85	75.91	91.36	126.3	61.97	54.67	55.33	54.1	73.16	79.07	360.6	360.6	360.6	360.6	360.6	360.6	360.6	360.6	360.6	362	359.8	360.6	360.9	360.9	360.9	360.9	360.9	360.9	0.76	0.86	0.83	0.82	0.87	0.88	0.89	0.85
30	ISF of Tryptamine [M+H-NH3]+ C10H12N2 NIST 1065667---Tryptamine [M+H]+ C10H12N2 NIST 1065657	MS2	-	55.056	360.58	38.52	43.64	45.13	40.79	40.63	43.06	43.56	42.98	42.95	25.82	28.2	42.22	17.32	19.88	16.81	19.58	28.46	28.68	360.6	360.6	360.6	360.6	360.6	360.6	360.6	360.6	360.6	362	359.8	360.6	360.9	360.9	360.9	360.9	360.9	360.9	0.76	0.86	0.83	0.82	0.87	0.88	0.89	0.85
30	ISF of Tryptamine [M+H-NH3]+ C10H12N2 NIST 1065667---Tryptamine [M+H]+ C10H12N2 NIST 1065657	MS2	-	59.05	360.58	14.55	12.95	14.88	14.67	18.94	14.9	16.09	14.84	17.94	9.67	9.16	15.62	5.94	7.74	6.5	7.21	9.08	9.5	360.6	360.6	360.6	360.6	360.6	360.6	360.6	360.6	360.6	362	359.8	360.6	360.9	360.9	360.9	360.9	360.9	360.9	0.76	0.86	0.83	0.82	0.87	0.88	0.89	0.85
30	ISF of Tryptamine [M+H-NH3]+ C10H12N2 NIST 1065667---Tryptamine [M+H]+ C10H12N2 NIST 1065657	MS2	-	71.0885	360.58	2.55	2.32	3.45	4.96	3.05	4.37	3.08	2.7	3.79	2.28	3.11	3.23	1.2	1.22	1.83	0.59	1.51	3.13	360.6	360.6	360.6	360.6	360.6	360.6	360.6	360.6	360.6	362	359.8	360.6	360.9	360.9	360.9	360.9	360.9	360.9	0.76	0.86	0.83	0.82	0.87	0.88	0.89	0.85
30	Tryptamine [M+H-NH3]+ C10H12N2 NIST 1065667---Tryptamine [M+H]+ C10H12N2 NIST 1065657	MS1	M+H	161.106	360.68	4.79			8.35	20.55	22.7	29.15	27.27	42.5	64.24	62.44	58.24	147.17	147.69	154.87	283.04	276.64	277.51	360.7			359.8	362	360.7	360.9	360.9	360.9	360.9	362	360.9	362	360.9	360.9	360.9	360.9	360.9	0.99			1	0.99	0.99	1	1
30	Tryptamine [M+H-NH3]+ C10H12N2 NIST 1065667---Tryptamine [M+H]+ C10H12N2 NIST 1065657	MS2	M+H	144.081	360.68	45.55			59.02	101.11	106.94	197.07	203.93	250.33	422.26	423.1	395.88	1197	1022.82	1089.96	1897.49	1823.55	2171.82	360.7			359.8	362	360.7	360.9	360.9	360.9	360.9	362	360.9	362	360.9	360.9	360.9	360.9	360.9	0.99			1	0.99	0.99	1	1
30	Tryptamine [M+H-NH3]+ C10H12N2 NIST 1065667---Tryptamine [M+H]+ C10H12N2 NIST 1065657	MS2	M+H	143.073	360.68	12.86			13.33	17.98	23.46	45.17	45.22	43.16	76.16	87.52	85.78	241.99	227.08	228.91	403.83	411.3	455.38	360.7			359.8	362	360.7	360.9	360.9	360.9	360.9	362	360.9	362	360.9	360.9	360.9	360.9	360.9	0.99			1	0.99	0.99	1	1
30	Tryptamine [M+H-NH3]+ C10H12N2 NIST 1065667---Tryptamine [M+H]+ C10H12N2 NIST 1065657	MS2	M+H	117.068	360.68	16.72			12.96	11.37	21.82	34.1	34.26	36.03	73.6	69.57	67.36	221.37	199.93	193.83	386.99	373.29	442.35	360.7			359.8	362	360.7	360.9	360.9	360.9	360.9	362	360.9	362	360.9	360.9	360.9	360.9	360.9	0.99			1	0.99	0.99	1	1
30	Tryptamine [M+H-NH3]+ C10H12N2 NIST 1065667---Tryptamine [M+H]+ C10H12N2 NIST 1065657	MS2	M+H	115.054	360.68	17.76			10.86	13.21	24.71	28.82	30.38	29.41	65.02	63.86	60.36	161.99	151.5	150.31	271.28	279.1	314.59	360.7			359.8	362	360.7	360.9	360.9	360.9	360.9	362	360.9	362	360.9	360.9	360.9	360.9	360.9	0.99			1	0.99	0.99	1	1
30	Tryptamine [M+H-NH3]+ C10H12N2 NIST 1065667---Tryptamine [M+H]+ C10H12N2 NIST 1065657	MS2	M+H	127.054	360.68	8.78			5.56	9.22	11.81	18.87	20.28	19.02	37.56	38.95	36.56	115.48	101.62	103.48	201.85	198.68	228.11	360.7			359.8	362	360.7	360.9	360.9	360.9	360.9	362	360.9	362	360.9	360.9	360.9	360.9	360.9	0.99			1	0.99	0.99	1	1
30	Tryptamine [M+H-NH3]+ C10H12N2 NIST 1065667---Tryptamine [M+H]+ C10H12N2 NIST 1065657	MS2	M+H	91.054	360.68	32.63			6.01	11.96	35.87	24.95	20.9	22.64	34.09	35.86	34.26	84.44	71.71	74.74	117.48	118.86	129.33	360.7			359.8	362	360.7	360.9	360.9	360.9	360.9	362	360.9	362	360.9	360.9	360.9	360.9	360.9	0.99			1	0.99	0.99	1	1
31	Carnitine C7H15NO3	MS1	M+H	162.112	59.26	16.58	18.76	17.44	39.88	43.73	39.89	81.66	81.39	76.48	144.21	143.46	148.34	314.18	316.66	315.36	546.29	588.55	582.63	59.5	59.5	59.5	59.5	59.5	59.5	59.5	59.5	59.5	59.5	59.5	59.5	59.5	59.5	59.5	59.5	59.5	59.5	0.96	0.98	0.95	0.98	0.98	0.98	1	0.99
31	Carnitine C7H15NO3	MS2	M+H	162.113	59.26	8.87	8.38	6.47	18.1	19.05	20.12	36.26	33.7	43.15	65.54	67.87	60.49	143.11	175.36	203.33	379.1	279.47	282.35	59.5	59.5	59.5	59.5	59.5	59.5	59.5	59.5	59.5	59.5	59.5	59.5	59.5	59.5	59.5	59.5	59.5	59.5	0.96	0.98	0.95	0.98	0.98	0.98	1	0.99
31	Carnitine C7H15NO3	MS2	M+H	103.039	59.26	5.37	3.69	4.38	9.06	8.96	6.92	14.85	16.61	21.38	31.89	33.33	37.88	85.69	81.9	91.12	158.54	148.32	146.21	59.5	59.5	59.5	59.5	59.5	59.5	59.5	59.5	59.5	59.5	59.5	59.5	59.5	59.5	59.5	59.5	59.5	59.5	0.96	0.98	0.95	0.98	0.98	0.98	1	0.99
31	Carnitine C7H15NO3	MS2	M+H	60.0806	59.26	1.86	1.35	1.54	3.26	3.94	3.01	7.41	8.67	6.55	14.67	11.86	13.46	31.39	38.14	36.13	64.77	66.37	60.91	59.5	59.5	59.5	59.5	59.5	59.5	59.5	59.5	59.5	59.5	59.5	59.5	59.5	59.5	59.5	59.5	59.5	59.5	0.96	0.98	0.95	0.98	0.98	0.98	1	0.99
31	Carnitine C7H15NO3	MS2	M+H	85.0281	59.26	2.89	4.51	2.06	6.07	4.79	5.2	9.22	8.65	8.96	15.58	18.01	21.71	52.87	45.61	47.44	82.82	81.89	79.73	59.5	59.5	59.5	59.5	59.5	59.5	59.5	59.5	59.5	59.5	59.5	59.5	59.5	59.5	59.5	59.5	59.5	59.5	0.96	0.98	0.95	0.98	0.98	0.98	1	0.99
31	Carnitine C7H15NO3	MS2	M+H	102.091	59.26	3.34	2.05	1.94	3.95	4.5	4.65	7.85	9.24	10.75	17.92	15.9	14.47	40.7	40.37	47.67	83.25	84.29	70.84	59.5	59.5	59.5	59.5	59.5	59.5	59.5	59.5	59.5	59.5	59.5	59.5	59.5	59.5	59.5	59.5	59.5	59.5	0.96	0.98	0.95	0.98	0.98	0.98	1	0.99
31	Carnitine C7H15NO3	MS2	M+H	43.0179	59.26	11.96	13.91	15.55	16.95	20.13	16.2	21.85	21.93	19.44	27.03	33.91	31.9	56.81	48.61	54.84	94.27	91.97	85.56	59.5	59.5	59.5	59.5	59.5	59.5	59.5	59.5	59.5	59.5	59.5	59.5	59.5	59.5	59.5	59.5	59.5	59.5	0.96	0.98	0.95	0.98	0.98	0.98	1	0.99
32	3,4-Dihydrocoumarin [2M+H]+ C9H8O2 NIST 1159003---3,4-Dihydrocoumarin [M+H]+ C9H8O2 NIST 1158986	MS1	M+NH4	166.085	96.05	3.19	3.22	1.43	4.94	6.22	8.24	12.21	11.05	10.89	19.72	18.33	17.3	68.88	41.4	65.98	65.39	63.69	57.16	96	96	96	96	96	96	96	96	96	93.6	96	96	93.6	96	98	94.7	96	96	0.88	0.68	0.77	0.89	0.8	0.84	0.82	0.89
32	3,4-Dihydrocoumarin [2M+H]+ C9H8O2 NIST 1159003---3,4-Dihydrocoumarin [M+H]+ C9H8O2 NIST 1158986	MS2	M+NH4	166.085	96.05	2.74	0	2.06	3.04	4.62	3.18	6.95	5.15	6.99	13.74	11.75	11.25	34.62	25.58	39.63	32.46	28.73	26.74	96	96	96	96	96	96	96	96	96	93.6	96	96	93.6	96	98	94.7	96	96	0.88	0.68	0.77	0.89	0.8	0.84	0.82	0.89
32	3,4-Dihydrocoumarin [2M+H]+ C9H8O2 NIST 1159003---3,4-Dihydrocoumarin [M+H]+ C9H8O2 NIST 1158986	MS2	M+NH4	107.048	96.05	8.07	6.34	5.62	8.11	9.15	10.24	12.28	11.3	11.27	21.87	16.8	16.58	56.93	38.32	58.76	69.64	69.37	65.84	96	96	96	96	96	96	96	96	96	93.6	96	96	93.6	96	98	94.7	96	96	0.88	0.68	0.77	0.89	0.8	0.84	0.82	0.89
32	3,4-Dihydrocoumarin [2M+H]+ C9H8O2 NIST 1159003---3,4-Dihydrocoumarin [M+H]+ C9H8O2 NIST 1158986	MS2	M+NH4	79.0561	96.05	27.44	23.93	24.27	27.02	25.96	22.65	24.95	24.38	24.44	31.24	24.16	26.06	63.87	26.82	54.7	33.01	25.65	25.83	96	96	96	96	96	96	96	96	96	93.6	96	96	93.6	96	98	94.7	96	96	0.88	0.68	0.77	0.89	0.8	0.84	0.82	0.89
32	3,4-Dihydrocoumarin [2M+H]+ C9H8O2 NIST 1159003---3,4-Dihydrocoumarin [M+H]+ C9H8O2 NIST 1158986	MS2	M+NH4	123.043	96.05	7.88	12.7	9.73	18.26	17.82	19.64	37.08	36.05	36.81	71.86	77.66	76.6	166.14	170.74	192.56	298.77	344	297.51	96	96	96	96	96	96	96	96	96	93.6	96	96	93.6	96	98	94.7	96	96	0.88	0.68	0.77	0.89	0.8	0.84	0.82	0.89
32	3,4-Dihydrocoumarin [2M+H]+ C9H8O2 NIST 1159003---3,4-Dihydrocoumarin [M+H]+ C9H8O2 NIST 1158986	MS2	M+NH4	151.059	96.05	3.88	4.48	0	3.46	0	0	4.91	5.26	0	7.74	5.21	6.5	15.49	9.87	16.71	13.51	11.13	11.68	96	96	96	96	96	96	96	96	96	93.6	96	96	93.6	96	98	94.7	96	96	0.88	0.68	0.77	0.89	0.8	0.84	0.82	0.89
32	3,4-Dihydrocoumarin [2M+H]+ C9H8O2 NIST 1159003---3,4-Dihydrocoumarin [M+H]+ C9H8O2 NIST 1158986	MS2	M+NH4	148.074	96.05	1.57	0	0	0	0	0	0	1.1	0.68	2.28	0	0	11	7.5	6.93	7.2	4.7	9.71	96	96	96	96	96	96	96	96	96	93.6	96	96	93.6	96	98	94.7	96	96	0.88	0.68	0.77	0.89	0.8	0.84	0.82	0.89
33	ISF of Phenylalanine C9H11NO2	MS1	-	120.08	185.66	14.98	14.13	14.19	39.59	40.87	40.61	92.45	93.52	101.34	174.64	186.71	186.11	462.03	453.5	437.36	815.72	837.35	835.74	184.9	184.9	185.7	184.9	184.9	186	184.9	184.9	186	186	186	184.9	186	184.9	184.9	184.9	186	184.9	0.92	0.95	0.94	0.95	0.95	0.97	0.99	0.98
33	ISF of Phenylalanine C9H11NO2	MS2	-	103.055	185.66	10.86	9.93	22.98	12.13	12.45	17.01	21.51	22.12	20.46	36.64	41.69	38.22	84.58	97.4	95.21	185.92	181.36	179.65	184.9	184.9	185.7	184.9	184.9	186	184.9	184.9	186	186	186	184.9	186	184.9	184.9	184.9	186	184.9	0.92	0.95	0.94	0.95	0.95	0.97	0.99	0.98
33	ISF of Phenylalanine C9H11NO2	MS2	-	77.0387	185.66	21.46	21.17	53.39	23.1	23.94	27.08	25.29	28.62	29.12	43.05	42.45	44.59	77.95	74.65	71.39	112.94	123.1	119.49	184.9	184.9	185.7	184.9	184.9	186	184.9	184.9	186	186	186	184.9	186	184.9	184.9	184.9	186	184.9	0.92	0.95	0.94	0.95	0.95	0.97	0.99	0.98
33	ISF of Phenylalanine C9H11NO2	MS2	-	120.081	185.66	1.72	1.75	4.05	4.77	4.35	6.06	9.15	9.79	8.48	15.88	17.88	18.51	56.45	47	47.63	88.77	103.26	90.57	184.9	184.9	185.7	184.9	184.9	186	184.9	184.9	186	186	186	184.9	186	184.9	184.9	184.9	186	184.9	0.92	0.95	0.94	0.95	0.95	0.97	0.99	0.98
33	ISF of Phenylalanine C9H11NO2	MS2	-	91.0543	185.66	25.64	21.89	59.33	23.32	27.12	26.25	26.11	32.39	24.95	36.89	38.57	36.99	53.53	56.13	49.89	69.25	75.17	71.64	184.9	184.9	185.7	184.9	184.9	186	184.9	184.9	186	186	186	184.9	186	184.9	184.9	184.9	186	184.9	0.92	0.95	0.94	0.95	0.95	0.97	0.99	0.98
33	ISF of Phenylalanine C9H11NO2	MS2	-	51.023	185.66	7.17	4.38	15.86	5.39	4.85	6.28	6.3	6.9	6.51	9.14	9.93	9.33	15.72	13.97	12.42	21.87	20.62	18.25	184.9	184.9	185.7	184.9	184.9	186	184.9	184.9	186	186	186	184.9	186	184.9	184.9	184.9	186	184.9	0.92	0.95	0.94	0.95	0.95	0.97	0.99	0.98
33	ISF of Phenylalanine C9H11NO2	MS2	-	93.0709	185.66	3.2	2.62	7.75	3.15	3.46	3.96	2.92	4.46	3.05	5.23	3.79	6.07	9.46	10.11	12.32	18.34	16.75	15.44	184.9	184.9	185.7	184.9	184.9	186	184.9	184.9	186	186	186	184.9	186	184.9	184.9	184.9	186	184.9	0.92	0.95	0.94	0.95	0.95	0.97	0.99	0.98
33	Phenylalanine C9H11NO2	MS1	M+H	166.085	185.66	6.85	7.79	7.95	16.75	17.58	17.79	39.06	37.39	39.51	69.76	73.62	75.49	192.81	191.54	184.58	386.4	392.94	386.51	186	184.9	184.9	184.9	184.9	184.9	184.9	184.9	186	186	184.9	184.9	186	184.9	184.9	184.9	186	184.9	0.96	0.96	0.94	0.99	0.99	0.99	1	1
33	Phenylalanine C9H11NO2	MS2	M+H	120.081	185.66	41.05	36.58	37.51	96.27	88.03	97.61	183.39	208.2	206.25	421.47	404.98	395.33	898.44	1056.41	1095.93	2159.79	1936.72	1909.34	186	184.9	184.9	184.9	184.9	184.9	184.9	184.9	186	186	184.9	184.9	186	184.9	184.9	184.9	186	184.9	0.96	0.96	0.94	0.99	0.99	0.99	1	1
33	Phenylalanine C9H11NO2	MS2	M+H	103.054	185.66	21.77	21.58	16.71	39.55	41.71	40.04	95.44	81.08	92.16	169.33	214.71	175.25	405.19	424.62	461.02	812	841.96	866.97	186	184.9	184.9	184.9	184.9	184.9	184.9	184.9	186	186	184.9	184.9	186	184.9	184.9	184.9	186	184.9	0.96	0.96	0.94	0.99	0.99	0.99	1	1
33	Phenylalanine C9H11NO2	MS2	M+H	77.0385	185.66	21.74	21.93	17.12	18.44	21.44	19.76	29.84	25.69	26.97	40.54	46.19	35.13	59.41	71.87	83.23	111.57	123.17	129.15	186	184.9	184.9	184.9	184.9	184.9	184.9	184.9	186	186	184.9	184.9	186	184.9	184.9	184.9	186	184.9	0.96	0.96	0.94	0.99	0.99	0.99	1	1
33	Phenylalanine C9H11NO2	MS2	M+H	91.0541	185.66	21.58	23.95	20.26	22.44	24.13	24.72	31.17	24.94	31.71	37.07	45.94	40.51	66.84	70.74	74.11	111.47	128.73	119.11	186	184.9	184.9	184.9	184.9	184.9	184.9	184.9	186	186	184.9	184.9	186	184.9	184.9	184.9	186	184.9	0.96	0.96	0.94	0.99	0.99	0.99	1	1
33	Phenylalanine C9H11NO2	MS2	M+H	93.0695	185.66	9.08	8.53	9.47	11.8	7.27	13.04	19.85	16.94	16.29	25.47	27.85	26.06	55.11	61.43	64.29	128.73	118.59	121.08	186	184.9	184.9	184.9	184.9	184.9	184.9	184.9	186	186	184.9	184.9	186	184.9	184.9	184.9	186	184.9	0.96	0.96	0.94	0.99	0.99	0.99	1	1
33	Phenylalanine C9H11NO2	MS2	M+H	79.0543	185.66	11.42	13.24	11.08	10.62	10.92	14.69	16.32	12.57	14.36	20.75	21.54	20.37	30.66	33.22	34.61	48.85	56.6	53.6	186	184.9	184.9	184.9	184.9	184.9	184.9	184.9	186	186	184.9	184.9	186	184.9	184.9	184.9	186	184.9	0.96	0.96	0.94	0.99	0.99	0.99	1	1
34	dl-.beta.-Phenyllactic acid [M+Na]+ C9H10O3 NIST 1055534	MS1	M+Li	173.08	577.35	116.51	116.49	114.68	157.22	123.52	119.79	318.23	316.89	315.81	244.46	321.66	253.99	98.54	80.35	83.71	97.81	86	101.88	577.4	577.4	577.4	580.9	577.4	577.4	574.3	577.6	577.6	577.6	574.3	578.7	576.5	576.5	576.5	576.5	576.5	576.5	0.91	0.88	0.9	0.89	0.9	0.89	0.87	0.93
34	dl-.beta.-Phenyllactic acid [M+Na]+ C9H10O3 NIST 1055534	MS2	M+Li	55.0535	577.35	92.39	100.36	98.56	120.46	87.57	95.93	254.2	251.53	261.24	185.19	250.6	201.85	60.85	47.45	48.67	36.62	30.76	36.38	577.4	577.4	577.4	580.9	577.4	577.4	574.3	577.6	577.6	577.6	574.3	578.7	576.5	576.5	576.5	576.5	576.5	576.5	0.91	0.88	0.9	0.89	0.9	0.89	0.87	0.93
34	dl-.beta.-Phenyllactic acid [M+Na]+ C9H10O3 NIST 1055534	MS2	M+Li	173.081	577.35	12.83	8.65	8.25	12.16	10.76	8.45	23.93	24.38	23.91	22.53	26.37	15.5	4.58	3.82	4.87	1.51	5.33	2.38	577.4	577.4	577.4	580.9	577.4	577.4	574.3	577.6	577.6	577.6	574.3	578.7	576.5	576.5	576.5	576.5	576.5	576.5	0.91	0.88	0.9	0.89	0.9	0.89	0.87	0.93
34	dl-.beta.-Phenyllactic acid [M+Na]+ C9H10O3 NIST 1055534	MS2	M+Li	111.041	577.35	7.67	8.63	7.09	13.46	9.03	7.37	24.87	19.67	22.69	18.59	23.32	14.8	4.15	5.66	2.57	2.75	3.54	2.66	577.4	577.4	577.4	580.9	577.4	577.4	574.3	577.6	577.6	577.6	574.3	578.7	576.5	576.5	576.5	576.5	576.5	576.5	0.91	0.88	0.9	0.89	0.9	0.89	0.87	0.93
34	dl-.beta.-Phenyllactic acid [M+Na]+ C9H10O3 NIST 1055534	MS2	M+Li	138.136	577.35	109.45	111.85	114.56	149.93	110.74	114.16	319.9	281.94	279.19	219.14	295.39	234.99	68.96	54.45	54.97	37.85	40.22	40.15	577.4	577.4	577.4	580.9	577.4	577.4	574.3	577.6	577.6	577.6	574.3	578.7	576.5	576.5	576.5	576.5	576.5	576.5	0.91	0.88	0.9	0.89	0.9	0.89	0.87	0.93
34	dl-.beta.-Phenyllactic acid [M+Na]+ C9H10O3 NIST 1055534	MS2	M+Li	83.0501	577.35	9.1	12.14	8.77	16.12	12.62	11.89	33.44	35.57	29.93	24.72	35.58	24.33	7.54	4.78	6.09	5.72	4.08	3.63	577.4	577.4	577.4	580.9	577.4	577.4	574.3	577.6	577.6	577.6	574.3	578.7	576.5	576.5	576.5	576.5	576.5	576.5	0.91	0.88	0.9	0.89	0.9	0.89	0.87	0.93
34	dl-.beta.-Phenyllactic acid [M+Na]+ C9H10O3 NIST 1055534	MS2	M+Li	82.0713	577.35	23.21	18.84	21.42	25.87	20.6	20.55	54.28	55.76	59.77	40.71	51.79	43.74	12.98	9.86	9.2	9.58	7.12	8.1	577.4	577.4	577.4	580.9	577.4	577.4	574.3	577.6	577.6	577.6	574.3	578.7	576.5	576.5	576.5	576.5	576.5	576.5	0.91	0.88	0.9	0.89	0.9	0.89	0.87	0.93
35	2-Methylbenzoic acid [M+H]+ C8H8O2 NIST 1197886	MS1	M+K	175.014	624.2	29.54	26.74	30.17	27.28	29.16	28.06	28.76	31	28.07	28.13	29.66	33.91	30.91	29.16	25.5	27.73	28.15	34.92	623.8	623.8	623.8	623.8	623.8	623.8	623.8	623.8	623.8	623.8	623.8	624.9	624.9	623.8	623.8	623.8	623.8	624.9	0.76	0.79	0.87	0.82	0.68	0.89	0.69	0.76
35	2-Methylbenzoic acid [M+H]+ C8H8O2 NIST 1197886	MS2	M+K	77.0383	624.2	17.59	15.35	18.33	15.94	16.2	14.77	18.23	17.07	19.83	18.04	16.91	20.99	23.09	18.56	17.79	16.96	16.41	23.34	623.8	623.8	623.8	623.8	623.8	623.8	623.8	623.8	623.8	623.8	623.8	624.9	624.9	623.8	623.8	623.8	623.8	624.9	0.76	0.79	0.87	0.82	0.68	0.89	0.69	0.76
35	2-Methylbenzoic acid [M+H]+ C8H8O2 NIST 1197886	MS2	M+K	130.034	624.2	0	1.62	1.43	2.58	0	2.06	0	2.14	3.72	2.02	2.58	2.38	1.98	2.22	0	3.01	2.3	2.3	623.8	623.8	623.8	623.8	623.8	623.8	623.8	623.8	623.8	623.8	623.8	624.9	624.9	623.8	623.8	623.8	623.8	624.9	0.76	0.79	0.87	0.82	0.68	0.89	0.69	0.76
35	2-Methylbenzoic acid [M+H]+ C8H8O2 NIST 1197886	MS2	M+K	91.0576	624.2	32.23	29.67	26.3	30.74	29	30.69	29.7	28.47	29.77	29.35	27.53	32.43	33.62	28.72	29.12	29.75	30.86	36.83	623.8	623.8	623.8	623.8	623.8	623.8	623.8	623.8	623.8	623.8	623.8	624.9	624.9	623.8	623.8	623.8	623.8	624.9	0.76	0.79	0.87	0.82	0.68	0.89	0.69	0.76
35	2-Methylbenzoic acid [M+H]+ C8H8O2 NIST 1197886	MS2	M+K	157.011	624.2	0	0	0	0	0	0.43	0	0	0	0.09	0	0	0	0	0	0	0.09	0	623.8	623.8	623.8	623.8	623.8	623.8	623.8	623.8	623.8	623.8	623.8	624.9	624.9	623.8	623.8	623.8	623.8	624.9	0.76	0.79	0.87	0.82	0.68	0.89	0.69	0.76
35	2-Methylbenzoic acid [M+H]+ C8H8O2 NIST 1197886	MS2	M+K	175.029	624.2	0.46	0	0.46	0	0	0.6	0	0	0	0	0	0	0	0	0	0	0	0	623.8	623.8	623.8	623.8	623.8	623.8	623.8	623.8	623.8	623.8	623.8	624.9	624.9	623.8	623.8	623.8	623.8	624.9	0.76	0.79	0.87	0.82	0.68	0.89	0.69	0.76
35	2-Methylbenzoic acid [M+H]+ C8H8O2 NIST 1197886	MS2	M+K	51.0235	624.2	0.15	0.52	0.6	0.25	0.74	0	0.5	0	0	0.84	0	0.89	1	0.32	0.95	0	0	0	623.8	623.8	623.8	623.8	623.8	623.8	623.8	623.8	623.8	623.8	623.8	624.9	624.9	623.8	623.8	623.8	623.8	624.9	0.76	0.79	0.87	0.82	0.68	0.89	0.69	0.76
36	ISF of L-Arginine [M+H]+ C6H14N4O2 NIST 1075986	MS1	-	116.07	60.69	10.58	11.92	10.78	12.59	13.27	12.93	14.37	14.37	16.26	16.62	19.32	28.03	35.76	36.65					60.7	60.7	60.7	60.7	60.7	60.7	60.7	60.7	60.7	60.7	63.9	63.9	63.9	62.8					0.86	0.83	0.88	0.84	0.8	0.8	0.75	0.71
36	ISF of L-Arginine [M+H]+ C6H14N4O2 NIST 1075986	MS2	-	70.0663	60.69	16.35	17.84	19	15.51	16.44	16.14	19.27	17.66	18.2	15.71	18.42	32.64	26.32	30.41					60.7	60.7	60.7	60.7	60.7	60.7	60.7	60.7	60.7	60.7	63.9	63.9	63.9	62.8					0.86	0.83	0.88	0.84	0.8	0.8	0.75	0.71
36	ISF of L-Arginine [M+H]+ C6H14N4O2 NIST 1075986	MS2	-	56.9651	60.69	5.92	7.13	6.59	5.99	6.18	6.39	7.25	8.16	5.26	6.73	7.89	12.57	13.4	11.85					60.7	60.7	60.7	60.7	60.7	60.7	60.7	60.7	60.7	60.7	63.9	63.9	63.9	62.8					0.86	0.83	0.88	0.84	0.8	0.8	0.75	0.71
36	ISF of L-Arginine [M+H]+ C6H14N4O2 NIST 1075986	MS2	-	88.0794	60.69	1.76	0	2.71	1.89	2.8	2.02	0.81	2.09	2.25	2.54	1.11	2.79	4.86	6.04					60.7	60.7	60.7	60.7	60.7	60.7	60.7	60.7	60.7	60.7	63.9	63.9	63.9	62.8					0.86	0.83	0.88	0.84	0.8	0.8	0.75	0.71
36	ISF of L-Arginine [M+H]+ C6H14N4O2 NIST 1075986	MS2	-	81.0719	60.69	11.86	13.95	15.1	13.15	13.19	14.36	12.76	14.83	17.1	13.49	16.48	26.2	23.5	18.52					60.7	60.7	60.7	60.7	60.7	60.7	60.7	60.7	60.7	60.7	63.9	63.9	63.9	62.8					0.86	0.83	0.88	0.84	0.8	0.8	0.75	0.71
36	ISF of L-Arginine [M+H]+ C6H14N4O2 NIST 1075986	MS2	-	44.0491	60.69	8	8.44	8.2	13.46	15.58	15.37	24.18	23.76	23.16	41.14	42.08	51.15	97.65	97.11					60.7	60.7	60.7	60.7	60.7	60.7	60.7	60.7	60.7	60.7	63.9	63.9	63.9	62.8					0.86	0.83	0.88	0.84	0.8	0.8	0.75	0.71
36	ISF of L-Arginine [M+H]+ C6H14N4O2 NIST 1075986	MS2	-	99.0808	60.69	2.42	3.39	0	2.15	1.18	1.07	3.22	0	2.46	1	1.66	0	0	0					60.7	60.7	60.7	60.7	60.7	60.7	60.7	60.7	60.7	60.7	63.9	63.9	63.9	62.8					0.86	0.83	0.88	0.84	0.8	0.8	0.75	0.71
36	L-Arginine [M+H]+ C6H14N4O2 NIST 1075986	MS1	M+H	175.118	60.65	41.9	37.48	41.37	65.67	65.66	61.98	117.22	114.56	111.12	190.85	189.26	182.56	398.16	419.79	395.84	699.37	754.77	747.99	60.6	60.6	60.6	60.6	60.6	60.6	60.6	60.6	60.6	60.6	60.6	60.6	60.6	60.6	60.6	60.6	59.5	60.6	0.98	0.98	1	1	1	0.99	0.99	1
36	L-Arginine [M+H]+ C6H14N4O2 NIST 1075986	MS2	M+H	70.0649	60.65	23.95	18.27	22.95	51.24	45.79	35.53	74.08	85.81	72.96	146.57	144.1	146.16	324.67	318	342.65	566.6	518.62	538.96	60.6	60.6	60.6	60.6	60.6	60.6	60.6	60.6	60.6	60.6	60.6	60.6	60.6	60.6	60.6	60.6	59.5	60.6	0.98	0.98	1	1	1	0.99	0.99	1
36	L-Arginine [M+H]+ C6H14N4O2 NIST 1075986	MS2	M+H	116.071	60.65	9.72	6.33	7.92	9.92	8.7	9.9	15.54	18.46	20.31	31.42	28.56	26.31	69.55	70.28	85.44	136.53	109.38	98.78	60.6	60.6	60.6	60.6	60.6	60.6	60.6	60.6	60.6	60.6	60.6	60.6	60.6	60.6	60.6	60.6	59.5	60.6	0.98	0.98	1	1	1	0.99	0.99	1
36	L-Arginine [M+H]+ C6H14N4O2 NIST 1075986	MS2	M+H	175.119	60.65	10.92	7.23	5.43	14.52	14.7	13.41	20.34	19.93	23.66	34.42	40.18	31.22	60.18	86.1	99.16	182.69	124.92	133.9	60.6	60.6	60.6	60.6	60.6	60.6	60.6	60.6	60.6	60.6	60.6	60.6	60.6	60.6	60.6	60.6	59.5	60.6	0.98	0.98	1	1	1	0.99	0.99	1
36	L-Arginine [M+H]+ C6H14N4O2 NIST 1075986	MS2	M+H	60.0558	60.65	3.85	3.7	3.92	7.18	5.86	6.92	10.27	14.18	11.54	22.45	23.94	17.48	48.32	55.86	60.59	96.93	83.43	90.25	60.6	60.6	60.6	60.6	60.6	60.6	60.6	60.6	60.6	60.6	60.6	60.6	60.6	60.6	60.6	60.6	59.5	60.6	0.98	0.98	1	1	1	0.99	0.99	1
36	L-Arginine [M+H]+ C6H14N4O2 NIST 1075986	MS2	M+H	130.097	60.65	3.53	3.25	3.26	5.4	6.63	5.57	9.45	11.82	12.5	15.8	16.15	19.43	35.46	42.95	53.67	81.95	63.93	63.98	60.6	60.6	60.6	60.6	60.6	60.6	60.6	60.6	60.6	60.6	60.6	60.6	60.6	60.6	60.6	60.6	59.5	60.6	0.98	0.98	1	1	1	0.99	0.99	1
36	L-Arginine [M+H]+ C6H14N4O2 NIST 1075986	MS2	M+H	158.093	60.65	3.54	1.62	2.45	4.03	4.17	1.84	5.95	6.01	6.49	10.16	9.19	9.41	18.48	24.83	22.61	45.53	28.26	34.99	60.6	60.6	60.6	60.6	60.6	60.6	60.6	60.6	60.6	60.6	60.6	60.6	60.6	60.6	60.6	60.6	59.5	60.6	0.98	0.98	1	1	1	0.99	0.99	1
37	Serotonin [M+H-NH3]+ C10H12N2O NIST 1186902---Serotonin [M+H]+ C10H12N2O NIST 1067788	MS1	M+H	177.101	259.12				2.89	3.75	3.53	5.47	6.59	4.9	7.44	10.4	8.95	21.72	20.66	23.12	49.25	47.21	50.25				259.1	259.1	259.1	259.1	259.1	259.1	259.1	257.5	259.1	259.1	257.5	258.6	258.6	258.6	258.6				0.92	0.96	0.89	0.95	0.98
37	Serotonin [M+H-NH3]+ C10H12N2O NIST 1186902---Serotonin [M+H]+ C10H12N2O NIST 1067788	MS2	M+H	160.076	259.12				6.72	8.9	7.45	11.67	11.63	10.53	21.43	13.95	21.14	39.75	32.95	31.74	63.63	75.41	62.75				259.1	259.1	259.1	259.1	259.1	259.1	259.1	257.5	259.1	259.1	257.5	258.6	258.6	258.6	258.6				0.92	0.96	0.89	0.95	0.98
37	Serotonin [M+H-NH3]+ C10H12N2O NIST 1186902---Serotonin [M+H]+ C10H12N2O NIST 1067788	MS2	M+H	132.081	259.12				6.35	6.05	6.65	11.16	7.94	9.37	10.95	9.56	10.73	21.09	18.19	17.83	30.78	31.05	28.31				259.1	259.1	259.1	259.1	259.1	259.1	259.1	257.5	259.1	259.1	257.5	258.6	258.6	258.6	258.6				0.92	0.96	0.89	0.95	0.98
37	Serotonin [M+H-NH3]+ C10H12N2O NIST 1186902---Serotonin [M+H]+ C10H12N2O NIST 1067788	MS2	M+H	142.065	259.12				6.13	3.48	6.67	3.64	4.48	3.56	8.35	7.64	9.79	17.78	14.87	14.01	24.65	26.07	22.39				259.1	259.1	259.1	259.1	259.1	259.1	259.1	257.5	259.1	259.1	257.5	258.6	258.6	258.6	258.6				0.92	0.96	0.89	0.95	0.98
37	Serotonin [M+H-NH3]+ C10H12N2O NIST 1186902---Serotonin [M+H]+ C10H12N2O NIST 1067788	MS2	M+H	132.043	259.12				1.99	1.72	0	2.04	2.16	3.64	4.28	3.64	5.96	11.07	7.6	10.19	16.59	20.6	19.46				259.1	259.1	259.1	259.1	259.1	259.1	259.1	257.5	259.1	259.1	257.5	258.6	258.6	258.6	258.6				0.92	0.96	0.89	0.95	0.98
37	Serotonin [M+H-NH3]+ C10H12N2O NIST 1186902---Serotonin [M+H]+ C10H12N2O NIST 1067788	MS2	M+H	115.054	259.12				15.09	16.47	17.5	19.55	17.23	15.2	18.57	16.71	18.08	26.02	25.21	28.63	38.66	45.59	36.77				259.1	259.1	259.1	259.1	259.1	259.1	259.1	257.5	259.1	259.1	257.5	258.6	258.6	258.6	258.6				0.92	0.96	0.89	0.95	0.98
37	Serotonin [M+H-NH3]+ C10H12N2O NIST 1186902---Serotonin [M+H]+ C10H12N2O NIST 1067788	MS2	M+H	117.058	259.12				5.35	8.32	2.86	5.91	7.49	6.29	9.29	7.73	11.98	19.14	17.3	15.27	25.58	30.67	20.32				259.1	259.1	259.1	259.1	259.1	259.1	259.1	257.5	259.1	259.1	257.5	258.6	258.6	258.6	258.6				0.92	0.96	0.89	0.95	0.98
38	ISF of Serotonin [M+H-NH3]+ C10H12N2O NIST 1067806---Serotonin [M+H-NH3]+ C10H12N2O NIST 1067807	MS1	-	160.075	205.28	19.57	18.67	16.65	47.41	49.15	48.43	102.22	110.33	107.68	208.34	200.26	201.38	524.65	518.59	501.62	1002.21	992.24	1009	208	208	208	208	206.9	208	206.9	206.9	206.9	206.9	206.9	204.7	206.9	205.8	205.8	205.8	205.8	205.8	0.98	0.99	0.99	1	0.99	0.99	1	1
38	ISF of Serotonin [M+H-NH3]+ C10H12N2O NIST 1067806---Serotonin [M+H-NH3]+ C10H12N2O NIST 1067807	MS2	-	160.076	205.28	17.15	19.8	16.09	39.7	40.21	44.62	89.35	86.75	102.97	179.06	181.68	207.29	457.42	458.18	556.4	983.54	921.82	1045.55	208	208	208	208	206.9	208	206.9	206.9	206.9	206.9	206.9	204.7	206.9	205.8	205.8	205.8	205.8	205.8	0.98	0.99	0.99	1	0.99	0.99	1	1
38	ISF of Serotonin [M+H-NH3]+ C10H12N2O NIST 1067806---Serotonin [M+H-NH3]+ C10H12N2O NIST 1067807	MS2	-	115.054	205.28	19.87	19.75	14.58	25.14	23.41	24.35	45.69	45.8	41.41	79.13	72.12	86.34	206.54	199.24	206.71	392.44	391.12	383.23	208	208	208	208	206.9	208	206.9	206.9	206.9	206.9	206.9	204.7	206.9	205.8	205.8	205.8	205.8	205.8	0.98	0.99	0.99	1	0.99	0.99	1	1
38	ISF of Serotonin [M+H-NH3]+ C10H12N2O NIST 1067806---Serotonin [M+H-NH3]+ C10H12N2O NIST 1067807	MS2	-	117.057	205.28	7.26	6.25	5.57	9.92	13.74	11.59	24.93	22.95	24.7	45.68	39.84	43.6	120.69	111.69	131.37	236.64	233.77	244.2	208	208	208	208	206.9	208	206.9	206.9	206.9	206.9	206.9	204.7	206.9	205.8	205.8	205.8	205.8	205.8	0.98	0.99	0.99	1	0.99	0.99	1	1
38	ISF of Serotonin [M+H-NH3]+ C10H12N2O NIST 1067806---Serotonin [M+H-NH3]+ C10H12N2O NIST 1067807	MS2	-	132.08	205.28	7.61	6.36	5.23	9.86	10.53	10.57	24.46	21.38	21.06	38.41	37.61	40.32	89.29	98.82	105.45	202.27	198.25	206.66	208	208	208	208	206.9	208	206.9	206.9	206.9	206.9	206.9	204.7	206.9	205.8	205.8	205.8	205.8	205.8	0.98	0.99	0.99	1	0.99	0.99	1	1
38	ISF of Serotonin [M+H-NH3]+ C10H12N2O NIST 1067806---Serotonin [M+H-NH3]+ C10H12N2O NIST 1067807	MS2	-	159.068	205.28	2.81	4.94	2.8	4.35	4.92	7.51	14.37	11.25	12.31	21.22	22.56	20.82	49.24	58.82	62.51	113.6	117.46	99.24	208	208	208	208	206.9	208	206.9	206.9	206.9	206.9	206.9	204.7	206.9	205.8	205.8	205.8	205.8	205.8	0.98	0.99	0.99	1	0.99	0.99	1	1
38	ISF of Serotonin [M+H-NH3]+ C10H12N2O NIST 1067806---Serotonin [M+H-NH3]+ C10H12N2O NIST 1067807	MS2	-	142.064	205.28	4.55	3.4	3.32	4.73	5.81	7.68	8.21	9.33	8.08	14.97	18.75	16.42	41.49	36.48	40.55	75.99	82.96	82.24	208	208	208	208	206.9	208	206.9	206.9	206.9	206.9	206.9	204.7	206.9	205.8	205.8	205.8	205.8	205.8	0.98	0.99	0.99	1	0.99	0.99	1	1
38	Serotonin [M+H-NH3]+ C10H12N2O NIST 1067806---Serotonin [M+H-NH3]+ C10H12N2O NIST 1067807	MS1	M+H	177.101	205.28	3.75	5.32	4.35	12.2	8.67	10.14	15.53	15.98	12.84	22.6	24.35	23.59	60.05	55.24	57.18	120.98	116.92	117.29	205.3	205.3	205.3	205.8	206.9	206.9	206.9	208	206.9	206.9	206.9	204.7	206.9	205.8	205.8	205.8	205.8	205.8	0.97	0.95	0.98	0.97	0.99	0.99	0.99	0.99
38	Serotonin [M+H-NH3]+ C10H12N2O NIST 1067806---Serotonin [M+H-NH3]+ C10H12N2O NIST 1067807	MS2	M+H	160.076	205.28	18.91	22.3	17.41	49.99	41.2	46.6	92.9	90.61	104.95	181.81	184.63	207.29	457.42	458.18	556.4	983.54	921.82	1045.55	205.3	205.3	205.3	205.8	206.9	206.9	206.9	208	206.9	206.9	206.9	204.7	206.9	205.8	205.8	205.8	205.8	205.8	0.97	0.95	0.98	0.97	0.99	0.99	0.99	0.99
38	Serotonin [M+H-NH3]+ C10H12N2O NIST 1067806---Serotonin [M+H-NH3]+ C10H12N2O NIST 1067807	MS2	M+H	115.054	205.28	27.22	24.57	22.86	41.88	25.01	27.47	50.21	48	42.93	81.78	74.03	86.34	206.54	199.24	206.71	392.44	391.12	383.23	205.3	205.3	205.3	205.8	206.9	206.9	206.9	208	206.9	206.9	206.9	204.7	206.9	205.8	205.8	205.8	205.8	205.8	0.97	0.95	0.98	0.97	0.99	0.99	0.99	0.99
38	Serotonin [M+H-NH3]+ C10H12N2O NIST 1067806---Serotonin [M+H-NH3]+ C10H12N2O NIST 1067807	MS2	M+H	117.058	205.28	8.91	8.08	7.56	18.38	14.75	14.67	25.84	25.31	25.53	47.24	40.85	43.6	120.69	111.69	131.37	236.64	233.88	244.2	205.3	205.3	205.3	205.8	206.9	206.9	206.9	208	206.9	206.9	206.9	204.7	206.9	205.8	205.8	205.8	205.8	205.8	0.97	0.95	0.98	0.97	0.99	0.99	0.99	0.99
38	Serotonin [M+H-NH3]+ C10H12N2O NIST 1067806---Serotonin [M+H-NH3]+ C10H12N2O NIST 1067807	MS2	M+H	132.081	205.28	9.04	7.64	6.93	15.1	11	12.75	27.21	22.48	22.59	39.27	38.63	40.32	89.29	98.82	105.45	202.27	198.25	206.66	205.3	205.3	205.3	205.8	206.9	206.9	206.9	208	206.9	206.9	206.9	204.7	206.9	205.8	205.8	205.8	205.8	205.8	0.97	0.95	0.98	0.97	0.99	0.99	0.99	0.99
38	Serotonin [M+H-NH3]+ C10H12N2O NIST 1067806---Serotonin [M+H-NH3]+ C10H12N2O NIST 1067807	MS2	M+H	159.067	205.28	1.58	5.47	2.89	4.49	4.04	8.66	14.81	11.38	12.53	20.69	22.83	20.82	49.24	58.82	62.51	113.6	117.46	99.24	205.3	205.3	205.3	205.8	206.9	206.9	206.9	208	206.9	206.9	206.9	204.7	206.9	205.8	205.8	205.8	205.8	205.8	0.97	0.95	0.98	0.97	0.99	0.99	0.99	0.99
38	Serotonin [M+H-NH3]+ C10H12N2O NIST 1067806---Serotonin [M+H-NH3]+ C10H12N2O NIST 1067807	MS2	M+H	142.064	205.28	5.46	3.48	4.07	7.26	6.19	9.13	8.58	9.91	8.2	15.57	20.78	16.42	41.49	36.48	40.55	75.99	82.96	82.24	205.3	205.3	205.3	205.8	206.9	206.9	206.9	208	206.9	206.9	206.9	204.7	206.9	205.8	205.8	205.8	205.8	205.8	0.97	0.95	0.98	0.97	0.99	0.99	0.99	0.99
39	C10H11NO2; PlaSMA ID-458 C10H11NO2	MS1	M+H	178.085	187.18						4.54	5.48	6.76	4.94		11.11	10.97	33.52	29.79	32.38	50.38	51.75	46.62						187.2	187.2	187.2	187.2		187.2	187.2	186	187.2	189.3	187.2	187.2	187.2						0.51	0.84	0.61
39	C10H11NO2; PlaSMA ID-458 C10H11NO2	MS2	M+H	176.07	187.18						0	1.06	0	0		5.85	4.15	13.87	12	11.9	23.13	22.33	16.32						187.2	187.2	187.2	187.2		187.2	187.2	186	187.2	189.3	187.2	187.2	187.2						0.51	0.84	0.61
39	C10H11NO2; PlaSMA ID-458 C10H11NO2	MS2	M+H	178.085	187.18						0	1.77	1.11	0		5.11	3.99	6.79	5.53	10.68	12.37	9.6	10.07						187.2	187.2	187.2	187.2		187.2	187.2	186	187.2	189.3	187.2	187.2	187.2						0.51	0.84	0.61
39	C10H11NO2; PlaSMA ID-458 C10H11NO2	MS2	M+H	88.021	187.18						31.87	31.11	32.83	30.78		33.61	31.81	37.81	34.34	37.92	30.37	33.48	32.29						187.2	187.2	187.2	187.2		187.2	187.2	186	187.2	189.3	187.2	187.2	187.2						0.51	0.84	0.61
39	C10H11NO2; PlaSMA ID-458 C10H11NO2	MS2	M+H	132.081	187.18						7.53	4.64	3.02	6.04		6.51	7.36	26.26	8.49	59.69	15.23	16.48	18.87						187.2	187.2	187.2	187.2		187.2	187.2	186	187.2	189.3	187.2	187.2	187.2						0.51	0.84	0.61
39	C10H11NO2; PlaSMA ID-458 C10H11NO2	MS2	M+H	137.059	187.18						3.21	2.64	4.23	2.2		3.7	3.26	0	5.8	6.27	7.79	7.42	9.12						187.2	187.2	187.2	187.2		187.2	187.2	186	187.2	189.3	187.2	187.2	187.2						0.51	0.84	0.61
39	C10H11NO2; PlaSMA ID-458 C10H11NO2	MS2	M+H	160.077	187.18						0	0	0	4.8		6.4	14.34	90.86	19.61	301.68	73.56	47.24	73.84						187.2	187.2	187.2	187.2		187.2	187.2	186	187.2	189.3	187.2	187.2	187.2						0.51	0.84	0.61
40	N-tert-Butyl-.alpha.-phenylnitrone [2M+H]+ C11H15NO NIST 1112983	MS1	M+H	178.122	633.88	2.66	1.88	4.64	4.25	2.28	4.09	4.37	4.83	2.94	5.87	5.23	5.63	6.69	6.86	7.17	11.83	13.5	14.16	633.9	633.9	633.9	633.9	633.9	633.9	633.9	633.9	633.9	633.9	633.9	633.9	633.7	633.7	633.7	633.7	633.7	633.7	0.91	0.89	0.85	0.87	0.79	0.85	0.93	0.88
40	N-tert-Butyl-.alpha.-phenylnitrone [2M+H]+ C11H15NO NIST 1112983	MS2	M+H	94.0651	633.88	41.21	37.21	38.98	42.08	36.78	39.63	38.62	38.31	41.67	36.78	38.29	41	25.23	16.7	23.77	24.53	24.12	27.86	633.9	633.9	633.9	633.9	633.9	633.9	633.9	633.9	633.9	633.9	633.9	633.9	633.7	633.7	633.7	633.7	633.7	633.7	0.91	0.89	0.85	0.87	0.79	0.85	0.93	0.88
40	N-tert-Butyl-.alpha.-phenylnitrone [2M+H]+ C11H15NO NIST 1112983	MS2	M+H	178.124	633.88	3.15	1.81	1.76	3.8	0	2.69	3.25	2.13	2.09	2.54	2.27	0.88	2.73	5.15	3.8	6.87	8.8	8.35	633.9	633.9	633.9	633.9	633.9	633.9	633.9	633.9	633.9	633.9	633.9	633.9	633.7	633.7	633.7	633.7	633.7	633.7	0.91	0.89	0.85	0.87	0.79	0.85	0.93	0.88
40	N-tert-Butyl-.alpha.-phenylnitrone [2M+H]+ C11H15NO NIST 1112983	MS2	M+H	178.159	633.88	50.73	40.66	48.38	41.65	50.02	43.1	47.94	43.97	46.17	43.41	45.39	50.52	23.02	16.54	21.32	20.99	18.18	18.55	633.9	633.9	633.9	633.9	633.9	633.9	633.9	633.9	633.9	633.9	633.9	633.9	633.7	633.7	633.7	633.7	633.7	633.7	0.91	0.89	0.85	0.87	0.79	0.85	0.93	0.88
40	N-tert-Butyl-.alpha.-phenylnitrone [2M+H]+ C11H15NO NIST 1112983	MS2	M+H	122.059	633.88	1.28	1.38	1.37	0	1.52	1	2.07	2.66	1.61	3.03	2.88	1.88	2.96	1.61	2.5	3.35	3.39	5.07	633.9	633.9	633.9	633.9	633.9	633.9	633.9	633.9	633.9	633.9	633.9	633.9	633.7	633.7	633.7	633.7	633.7	633.7	0.91	0.89	0.85	0.87	0.79	0.85	0.93	0.88
40	N-tert-Butyl-.alpha.-phenylnitrone [2M+H]+ C11H15NO NIST 1112983	MS2	M+H	77.0385	633.88	23.97	26.09	25.09	22.53	23.2	23.18	27.14	24.12	25.7	27.15	26.24	26.21	17.82	11.29	12.4	11.71	11.63	13.83	633.9	633.9	633.9	633.9	633.9	633.9	633.9	633.9	633.9	633.9	633.9	633.9	633.7	633.7	633.7	633.7	633.7	633.7	0.91	0.89	0.85	0.87	0.79	0.85	0.93	0.88
40	N-tert-Butyl-.alpha.-phenylnitrone [2M+H]+ C11H15NO NIST 1112983	MS2	M+H	149.12	633.88	39.54	38.41	41.62	35.63	40.44	41.27	44.32	42.6	40.31	39.69	39.02	39.29	25.21	17.76	17.76	17.64	19.17	18.35	633.9	633.9	633.9	633.9	633.9	633.9	633.9	633.9	633.9	633.9	633.9	633.9	633.7	633.7	633.7	633.7	633.7	633.7	0.91	0.89	0.85	0.87	0.79	0.85	0.93	0.88
41	Aspirin C9H8O4 MoNA 444374	MS1	M+H	181.049	778.83	6.68	5.1	5.09	6.65	7.14	5.98	6.35	6.31	4.53	5.41	6.78	6.89	5.63	5.9	6.12	7.44	7.13	7.08	780	780	778.9	780	778.9	780	780	778.9	778.9	778.9	780	778.9	778.9	780	778.9	778.9	778.9	778.9	0.92	0.9	0.91	0.88	0.9	0.91	0.91	0.92
41	Aspirin C9H8O4 MoNA 444374	MS2	M+H	181.178	778.83	3.92	2.67	2.01	5.24	4.69	3	4.62	6.03	2.89	1.17	6.11	6.64	2.74	5.1	5.63	0.94	3.19	4.78	780	780	778.9	780	778.9	780	780	778.9	778.9	778.9	780	778.9	778.9	780	778.9	778.9	778.9	778.9	0.92	0.9	0.91	0.88	0.9	0.91	0.91	0.92
41	Aspirin C9H8O4 MoNA 444374	MS2	M+H	152.141	778.83	57.18	26.71	26.41	50.44	55.17	32.42	49.24	50.7	26.04	23.19	53.72	58.57	29.56	61.87	59.24	26.81	56.45	57.32	780	780	778.9	780	778.9	780	780	778.9	778.9	778.9	780	778.9	778.9	780	778.9	778.9	778.9	778.9	0.92	0.9	0.91	0.88	0.9	0.91	0.91	0.92
41	Aspirin C9H8O4 MoNA 444374	MS2	M+H	149.023	778.83	16.23	8.89	7.6	15.5	16.38	11.88	17.18	20.1	10.24	11.01	16.11	19.03	9.43	19.37	14.76	8.43	19.4	16.82	780	780	778.9	780	778.9	780	780	778.9	778.9	778.9	780	778.9	778.9	780	778.9	778.9	778.9	778.9	0.92	0.9	0.91	0.88	0.9	0.91	0.91	0.92
41	Aspirin C9H8O4 MoNA 444374	MS2	M+H	137.121	778.83	11.54	3.78	7.44	11.7	5.99	4.28	7.71	8.93	7.75	7.99	9.01	14.11	4.17	7.95	9.73	5.33	9.61	9.08	780	780	778.9	780	778.9	780	780	778.9	778.9	778.9	780	778.9	778.9	780	778.9	778.9	778.9	778.9	0.92	0.9	0.91	0.88	0.9	0.91	0.91	0.92
41	Aspirin C9H8O4 MoNA 444374	MS2	M+H	163.037	778.83	4.83	2.75	3.25	3.42	4.74	3.59	4.57	2.65	2.92	2.44	5.07	4.42	2.76	6.31	5.06	2.11	4.85	4.49	780	780	778.9	780	778.9	780	780	778.9	778.9	778.9	780	778.9	778.9	780	778.9	778.9	778.9	778.9	0.92	0.9	0.91	0.88	0.9	0.91	0.91	0.92
41	Aspirin C9H8O4 MoNA 444374	MS2	M+H	93.0667	778.83	17.27	16.49	12.19	24.18	20.52	9.86	24.04	28.15	12.54	9.73	25.26	23.92	15.04	26.43	25.47	17.64	28.4	30.13	780	780	778.9	780	778.9	780	780	778.9	778.9	778.9	780	778.9	778.9	780	778.9	778.9	778.9	778.9	0.92	0.9	0.91	0.88	0.9	0.91	0.91	0.92
42	ISF of Theophylline [2M+H]+ C7H8N4O2 NIST 1067888---Theophylline [2M+H]+ C7H8N4O2 NIST 1067890	MS1	-	124.05	328.52				5.29	5.65		9.52	11.53	7.88			16.27			40		70.5					327.9	327.9		327.9	327.9	327.9			327.9			327.9		327.9					0.8	0.74		0.78	0.73
42	ISF of Theophylline [2M+H]+ C7H8N4O2 NIST 1067888---Theophylline [2M+H]+ C7H8N4O2 NIST 1067890	MS2	-	124.051	328.52				0	0		0	0	0			0			0		0					327.9	327.9		327.9	327.9	327.9			327.9			327.9		327.9					0.8	0.74		0.78	0.73
42	ISF of Theophylline [2M+H]+ C7H8N4O2 NIST 1067888---Theophylline [2M+H]+ C7H8N4O2 NIST 1067890	MS2	-	94.0685	328.52				3.31	2.14		2.38	2.03	2.28			2.55			2.72		4.86					327.9	327.9		327.9	327.9	327.9			327.9			327.9		327.9					0.8	0.74		0.78	0.73
42	ISF of Theophylline [2M+H]+ C7H8N4O2 NIST 1067888---Theophylline [2M+H]+ C7H8N4O2 NIST 1067890	MS2	-	82.9272	328.52				2.69	0		1.73	0.84	1.11			1.3			2.22		0.89					327.9	327.9		327.9	327.9	327.9			327.9			327.9		327.9					0.8	0.74		0.78	0.73
42	ISF of Theophylline [2M+H]+ C7H8N4O2 NIST 1067888---Theophylline [2M+H]+ C7H8N4O2 NIST 1067890	MS2	-	124.111	328.52				1.14	0.83		0.31	0	0.31			0.54			0.74		0.7					327.9	327.9		327.9	327.9	327.9			327.9			327.9		327.9					0.8	0.74		0.78	0.73
42	ISF of Theophylline [2M+H]+ C7H8N4O2 NIST 1067888---Theophylline [2M+H]+ C7H8N4O2 NIST 1067890	MS2	-	107.087	328.52				0	1.48		0	1.12	0			0.36			0.86		0.9					327.9	327.9		327.9	327.9	327.9			327.9			327.9		327.9					0.8	0.74		0.78	0.73
42	ISF of Theophylline [2M+H]+ C7H8N4O2 NIST 1067888---Theophylline [2M+H]+ C7H8N4O2 NIST 1067890	MS2	-	82.0659	328.52				2.05	1.2		1.95	0.98	1.81			0.75			1.24		0.98					327.9	327.9		327.9	327.9	327.9			327.9			327.9		327.9					0.8	0.74		0.78	0.73
42	Theophylline [2M+H]+ C7H8N4O2 NIST 1067888---Theophylline [2M+H]+ C7H8N4O2 NIST 1067890	MS1	M+H	181.072	328.52	96.33	87.87	85.05	211.52	209.1	194.24	395.7	420.46	396.35	721.28	745.29	723.34	1696.89	1567.22	1571.7	2886.52	2846.89	3020.36	327.9	327.9	327.9	327.9	327.9	327.9	327.9	327.9	327.9	327.9	327.9	327.9	327.9	327.9	327.9	327.9	327.9	327.9	1	1	1	1	0.99	1	1	1
42	Theophylline [2M+H]+ C7H8N4O2 NIST 1067888---Theophylline [2M+H]+ C7H8N4O2 NIST 1067890	MS2	M+H	181.073	328.52	50.47	65.07	50.7	152.49	117.35	128.47	262.39	379.13	300.19	556.18	643.81	548.59	1756.68	1340.66	1510.94	2643.57	2265.62	2221.56	327.9	327.9	327.9	327.9	327.9	327.9	327.9	327.9	327.9	327.9	327.9	327.9	327.9	327.9	327.9	327.9	327.9	327.9	1	1	1	1	0.99	1	1	1
42	Theophylline [2M+H]+ C7H8N4O2 NIST 1067888---Theophylline [2M+H]+ C7H8N4O2 NIST 1067890	MS2	M+H	124.051	328.52	48.6	51.11	59.32	150.98	141.73	142.12	298.35	312.2	307.54	530.99	515.01	483.44	1334.69	1277.25	1302.02	2518.9	2237.94	2282.47	327.9	327.9	327.9	327.9	327.9	327.9	327.9	327.9	327.9	327.9	327.9	327.9	327.9	327.9	327.9	327.9	327.9	327.9	1	1	1	1	0.99	1	1	1
42	Theophylline [2M+H]+ C7H8N4O2 NIST 1067888---Theophylline [2M+H]+ C7H8N4O2 NIST 1067890	MS2	M+H	96.0556	328.52	14.51	13.47	11.81	33.07	34.92	31.31	65.92	62.36	80.99	131.21	125.94	122.78	325.38	315.07	315.29	577.02	560.64	600.92	327.9	327.9	327.9	327.9	327.9	327.9	327.9	327.9	327.9	327.9	327.9	327.9	327.9	327.9	327.9	327.9	327.9	327.9	1	1	1	1	0.99	1	1	1
42	Theophylline [2M+H]+ C7H8N4O2 NIST 1067888---Theophylline [2M+H]+ C7H8N4O2 NIST 1067890	MS2	M+H	69.0447	328.52	6.17	6.33	5.52	13.69	14.2	13.4	31.82	20.42	30.58	52.79	46.01	62.44	147.59	143.03	138.66	252.98	265.87	272.52	327.9	327.9	327.9	327.9	327.9	327.9	327.9	327.9	327.9	327.9	327.9	327.9	327.9	327.9	327.9	327.9	327.9	327.9	1	1	1	1	0.99	1	1	1
42	Theophylline [2M+H]+ C7H8N4O2 NIST 1067888---Theophylline [2M+H]+ C7H8N4O2 NIST 1067890	MS2	M+H	42.0339	328.52	16.05	13.65	12.44	20.25	20.48	19.02	40.7	27.41	37.09	61.07	58.73	64.61	154.61	148.06	143.82	249.31	274.18	264.52	327.9	327.9	327.9	327.9	327.9	327.9	327.9	327.9	327.9	327.9	327.9	327.9	327.9	327.9	327.9	327.9	327.9	327.9	1	1	1	1	0.99	1	1	1
42	Theophylline [2M+H]+ C7H8N4O2 NIST 1067888---Theophylline [2M+H]+ C7H8N4O2 NIST 1067890	MS2	M+H	137.082	328.52	2.57	3.63	2.93	3.92	4.21	5.83	9.63	11.39	10.66	18.81	19.5	15.94	58.16	49.47	55.39	110.4	91.48	96.02	327.9	327.9	327.9	327.9	327.9	327.9	327.9	327.9	327.9	327.9	327.9	327.9	327.9	327.9	327.9	327.9	327.9	327.9	1	1	1	1	0.99	1	1	1
43	ISF of L-Tyrosine [M+H]+ C9H11NO3 NIST 1075803	MS1	-	123.043	92.13	14.42	15.89	14.38	13.83	14.78	18.76	18.62	20.22	18.45	27.81	32.06	25.92	55.06	50.23	53.66	91.8	87.47	86.8	92.1	92.1	92.1	92.5	91.4	91.4	92.5	91.4	92.5	91.4	91.4	92.5	92.5	92.5	91.4	91.4	91.4	91.4	0.84	0.78	0.76	0.8	0.74	0.87	0.8	0.89
43	ISF of L-Tyrosine [M+H]+ C9H11NO3 NIST 1075803	MS2	-	95.0507	92.13	0.95	0	1.96	1.21	0	2.92	0.98	3.43	1.94	2.34	3.19	2.55	36.42	28.27	41.67	158.57	151.76	113.7	92.1	92.1	92.1	92.5	91.4	91.4	92.5	91.4	92.5	91.4	91.4	92.5	92.5	92.5	91.4	91.4	91.4	91.4	0.84	0.78	0.76	0.8	0.74	0.87	0.8	0.89
43	ISF of L-Tyrosine [M+H]+ C9H11NO3 NIST 1075803	MS2	-	77.0388	92.13	55.15	54.48	45.46	39.51	42.11	64.23	32.35	41.25	31.71	36.43	33.51	27.84	26.71	26.33	29.51	28.05	33.92	32.2	92.1	92.1	92.1	92.5	91.4	91.4	92.5	91.4	92.5	91.4	91.4	92.5	92.5	92.5	91.4	91.4	91.4	91.4	0.84	0.78	0.76	0.8	0.74	0.87	0.8	0.89
43	ISF of L-Tyrosine [M+H]+ C9H11NO3 NIST 1075803	MS2	-	51.0237	92.13	15.87	14.98	14.45	9.17	12.76	19.82	10.85	10.19	8.42	10.31	9.71	7.15	7.56	7.85	7.31	8.05	8.36	9.09	92.1	92.1	92.1	92.5	91.4	91.4	92.5	91.4	92.5	91.4	91.4	92.5	92.5	92.5	91.4	91.4	91.4	91.4	0.84	0.78	0.76	0.8	0.74	0.87	0.8	0.89
43	ISF of L-Tyrosine [M+H]+ C9H11NO3 NIST 1075803	MS2	-	123.054	92.13	0	0.77	0	0	0.31	0.92	0	0	0.39	0.39	0.23	0	0.77	0.42	0.62	0	0.5	2.28	92.1	92.1	92.1	92.5	91.4	91.4	92.5	91.4	92.5	91.4	91.4	92.5	92.5	92.5	91.4	91.4	91.4	91.4	0.84	0.78	0.76	0.8	0.74	0.87	0.8	0.89
43	ISF of L-Tyrosine [M+H]+ C9H11NO3 NIST 1075803	MS2	-	79.0576	92.13	32.88	36.74	35.01	26.43	24.81	42.2	20.79	23.26	21.97	21.78	20.85	13.7	15	13.51	14.73	14.84	14.13	11.8	92.1	92.1	92.1	92.5	91.4	91.4	92.5	91.4	92.5	91.4	91.4	92.5	92.5	92.5	91.4	91.4	91.4	91.4	0.84	0.78	0.76	0.8	0.74	0.87	0.8	0.89
43	ISF of L-Tyrosine [M+H]+ C9H11NO3 NIST 1075803	MS2	-	81.0708	92.13	16.32	17.93	15.46	10.62	14	20.24	11.55	11	8.84	6.94	9.07	7.47	8.11	7.09	7.3	7.26	6.17	5.51	92.1	92.1	92.1	92.5	91.4	91.4	92.5	91.4	92.5	91.4	91.4	92.5	92.5	92.5	91.4	91.4	91.4	91.4	0.84	0.78	0.76	0.8	0.74	0.87	0.8	0.89
43	ISF of L-Tyrosine [M+H]+ C9H11NO3 NIST 1075803	MS1	-	136.075	92.13	6.73	6.24	5.93	14.36	14.39	13.19	26.14	29.32	27.58	49.31	47.9	50.28	119.85	115.14	107.47	203.06	207.12	200.58	92.5	91.4	91.4	92.5	92.5	91.4	92.5	92.5	92.5	92.5	92.5	92.5	92.5	92.5	91.4	91.4	91.4	91.4	0.94	0.95	0.94	0.96	0.95	0.95	0.96	0.96
43	ISF of L-Tyrosine [M+H]+ C9H11NO3 NIST 1075803	MS2	-	91.0539	92.13	63.65	64.32	50.68	49.61	52.49	50.4	56	54.19	53.66	54.56	59	59.5	88.96	88.02	84.97	127.28	121.28	130.43	92.5	91.4	91.4	92.5	92.5	91.4	92.5	92.5	92.5	92.5	92.5	92.5	92.5	92.5	91.4	91.4	91.4	91.4	0.94	0.95	0.94	0.96	0.95	0.95	0.96	0.96
43	ISF of L-Tyrosine [M+H]+ C9H11NO3 NIST 1075803	MS2	-	136.021	92.13	157.12	140.96	113.98	135.54	114.99	109.52	132.56	135.46	98.07	119.19	126.69	125.1	136.58	156.92	135.29	151.21	139.22	155.5	92.5	91.4	91.4	92.5	92.5	91.4	92.5	92.5	92.5	92.5	92.5	92.5	92.5	92.5	91.4	91.4	91.4	91.4	0.94	0.95	0.94	0.96	0.95	0.95	0.96	0.96
43	ISF of L-Tyrosine [M+H]+ C9H11NO3 NIST 1075803	MS2	-	109.011	92.13	40.3	37.7	35.9	32.03	32.97	29.27	30.78	30.59	24.01	29.67	24.62	25.91	25.22	28.29	24.69	27.74	28.77	25.11	92.5	91.4	91.4	92.5	92.5	91.4	92.5	92.5	92.5	92.5	92.5	92.5	92.5	92.5	91.4	91.4	91.4	91.4	0.94	0.95	0.94	0.96	0.95	0.95	0.96	0.96
43	ISF of L-Tyrosine [M+H]+ C9H11NO3 NIST 1075803	MS2	-	107.049	92.13	3.83	4.25	2.12	4.02	3.75	4.07	3.5	5.33	4.67	5.42	8.38	6.31	8.35	8.89	9.73	9.31	14.55	13.5	92.5	91.4	91.4	92.5	92.5	91.4	92.5	92.5	92.5	92.5	92.5	92.5	92.5	92.5	91.4	91.4	91.4	91.4	0.94	0.95	0.94	0.96	0.95	0.95	0.96	0.96
43	ISF of L-Tyrosine [M+H]+ C9H11NO3 NIST 1075803	MS2	-	65.0391	92.13	50.16	49.59	39.37	36.98	47.08	41.87	36.74	36.23	36.52	34.84	36.82	32.88	36.99	35.11	38.87	39.31	44.04	39.9	92.5	91.4	91.4	92.5	92.5	91.4	92.5	92.5	92.5	92.5	92.5	92.5	92.5	92.5	91.4	91.4	91.4	91.4	0.94	0.95	0.94	0.96	0.95	0.95	0.96	0.96
43	ISF of L-Tyrosine [M+H]+ C9H11NO3 NIST 1075803	MS2	-	119.049	92.13	2.85	1.36	1.52	3.26	2.13	2.62	2.81	1.59	2.15	1.66	2.05	1.37	6.64	5.82	3.68	7.79	12.06	16.79	92.5	91.4	91.4	92.5	92.5	91.4	92.5	92.5	92.5	92.5	92.5	92.5	92.5	92.5	91.4	91.4	91.4	91.4	0.94	0.95	0.94	0.96	0.95	0.95	0.96	0.96
43	ISF of L-Tyrosine [M+H]+ C9H11NO3 NIST 1075803	MS1	-	147.043	92.13		2.68	2.62	3.92	3.92	4.5	6.28	6.69	6.72	13.26	14.28	13.23	29.61	27.18	26.87	48.44	50.74	49.36		92.1	92.1	92.1	92.1	92.1	92.5	92.5	92.5	92.5	92.5	92.5	92.5	92.5	92.5	91.4	91.4	91.4		0.86	0.91	0.89	0.9	0.92	0.92	0.92
43	ISF of L-Tyrosine [M+H]+ C9H11NO3 NIST 1075803	MS2	-	91.0527	92.13		99.61	102.02	101.19	102.27	99.36	56	54.19	60.75	54.56	59	65.05	88.96	96.28	92.72	127.28	121.28	130.43		92.1	92.1	92.1	92.1	92.1	92.5	92.5	92.5	92.5	92.5	92.5	92.5	92.5	92.5	91.4	91.4	91.4		0.86	0.91	0.89	0.9	0.92	0.92	0.92
43	ISF of L-Tyrosine [M+H]+ C9H11NO3 NIST 1075803	MS2	-	119.049	92.13		1.78	3.11	3.91	2.35	3.31	2.81	1.59	2.19	1.66	2.05	1.48	6.64	6.05	3.45	7.79	12.06	16.79		92.1	92.1	92.1	92.1	92.1	92.5	92.5	92.5	92.5	92.5	92.5	92.5	92.5	92.5	91.4	91.4	91.4		0.86	0.91	0.89	0.9	0.92	0.92	0.92
43	ISF of L-Tyrosine [M+H]+ C9H11NO3 NIST 1075803	MS2	-	65.0389	92.13		80.38	83.21	86.78	91.51	89.11	36.74	36.23	42.8	34.84	36.82	37.44	36.99	41.05	46.65	39.31	44.04	39.9		92.1	92.1	92.1	92.1	92.1	92.5	92.5	92.5	92.5	92.5	92.5	92.5	92.5	92.5	91.4	91.4	91.4		0.86	0.91	0.89	0.9	0.92	0.92	0.92
43	ISF of L-Tyrosine [M+H]+ C9H11NO3 NIST 1075803	MS2	-	84.96	92.13		38.89	37.65	33.73	39.51	38.54	15.44	17.45	15.23	12.49	13.28	16.85	14.16	17.71	18.26	15.56	17.8	16.06		92.1	92.1	92.1	92.1	92.1	92.5	92.5	92.5	92.5	92.5	92.5	92.5	92.5	92.5	91.4	91.4	91.4		0.86	0.91	0.89	0.9	0.92	0.92	0.92
43	ISF of L-Tyrosine [M+H]+ C9H11NO3 NIST 1075803	MS2	-	147.044	92.13		0	0.67	2.02	0.76	1.56	0.51	0.51	0	0	0.08	0	1.18	0.84	1.52	0.34	1.35	1.05		92.1	92.1	92.1	92.1	92.1	92.5	92.5	92.5	92.5	92.5	92.5	92.5	92.5	92.5	91.4	91.4	91.4		0.86	0.91	0.89	0.9	0.92	0.92	0.92
43	ISF of L-Tyrosine [M+H]+ C9H11NO3 NIST 1075803	MS2	-	87.0437	92.13		36.07	36.65	95.6	105.53	99.45	16.87	18.76	19.54	22.66	23.84	36.25	58.76	70.63	77.89	107.32	119.37	103.28		92.1	92.1	92.1	92.1	92.1	92.5	92.5	92.5	92.5	92.5	92.5	92.5	92.5	92.5	91.4	91.4	91.4		0.86	0.91	0.89	0.9	0.92	0.92	0.92
43	ISF of L-Tyrosine [M+H]+ C9H11NO3 NIST 1075803	MS1	-	165.054	92.13	5.14	5.39	4.67	13.35	12.89	11.81	23.62	26.83	25.02	48.77	44.94	50.28	113.23	108.34	104.05	199.69	200.97	196.28	92.5	92.1	92.1	92.5	92.5	92.5	92.5	92.5	92.5	92.5	92.5	92.5	92.5	92.5	92.5	91.4	92.5	91.4	0.94	0.95	0.92	0.95	0.93	0.94	0.94	0.94
43	ISF of L-Tyrosine [M+H]+ C9H11NO3 NIST 1075803	MS2	-	95.0489	92.13	7.5	13.36	13.2	16.46	17.07	14.7	29.82	30.37	29.88	56.03	54.13	59.76	135.01	113.6	139.99	219.7	247.9	221.77	92.5	92.1	92.1	92.5	92.5	92.5	92.5	92.5	92.5	92.5	92.5	92.5	92.5	92.5	92.5	91.4	92.5	91.4	0.94	0.95	0.92	0.95	0.93	0.94	0.94	0.94
43	ISF of L-Tyrosine [M+H]+ C9H11NO3 NIST 1075803	MS2	-	123.044	92.13	6.09	12.91	9.38	15.6	16.17	17.78	32.89	32.48	34.57	65.02	72.36	73.47	153.16	163.94	175.28	284.92	335.2	284.23	92.5	92.1	92.1	92.5	92.5	92.5	92.5	92.5	92.5	92.5	92.5	92.5	92.5	92.5	92.5	91.4	92.5	91.4	0.94	0.95	0.92	0.95	0.93	0.94	0.94	0.94
43	ISF of L-Tyrosine [M+H]+ C9H11NO3 NIST 1075803	MS2	-	119.049	92.13	5.39	10.78	10.86	15.65	18.64	18.1	36.69	40.21	41.41	67.64	71.44	79.2	169.11	165.07	181.77	296.24	332.04	291.27	92.5	92.1	92.1	92.5	92.5	92.5	92.5	92.5	92.5	92.5	92.5	92.5	92.5	92.5	92.5	91.4	92.5	91.4	0.94	0.95	0.92	0.95	0.93	0.94	0.94	0.94
43	ISF of L-Tyrosine [M+H]+ C9H11NO3 NIST 1075803	MS2	-	77.0384	92.13	14.56	38.97	41.54	21.67	19.76	18.35	19.26	20.75	24.36	30.19	28.25	35.83	53.86	43.75	51.45	83.58	82.58	84.12	92.5	92.1	92.1	92.5	92.5	92.5	92.5	92.5	92.5	92.5	92.5	92.5	92.5	92.5	92.5	91.4	92.5	91.4	0.94	0.95	0.92	0.95	0.93	0.94	0.94	0.94
43	ISF of L-Tyrosine [M+H]+ C9H11NO3 NIST 1075803	MS2	-	91.0539	92.13	25.67	59.26	63.61	53.34	51.5	50.69	91.71	96.15	90.96	155.47	152.72	167.1	370.24	311.82	366.84	568.52	582.24	534.96	92.5	92.1	92.1	92.5	92.5	92.5	92.5	92.5	92.5	92.5	92.5	92.5	92.5	92.5	92.5	91.4	92.5	91.4	0.94	0.95	0.92	0.95	0.93	0.94	0.94	0.94
43	ISF of L-Tyrosine [M+H]+ C9H11NO3 NIST 1075803	MS2	-	165.055	92.13	2.24	3.9	2.41	4.65	6.42	6	13.18	9.7	12.37	20.11	21.36	22.26	28.05	43.39	47.76	83.74	80.14	66.32	92.5	92.1	92.1	92.5	92.5	92.5	92.5	92.5	92.5	92.5	92.5	92.5	92.5	92.5	92.5	91.4	92.5	91.4	0.94	0.95	0.92	0.95	0.93	0.94	0.94	0.94
43	L-Tyrosine [M+H]+ C9H11NO3 NIST 1075803	MS1	M+H	182.08	92.13	6.64	5.14	6.37	15.3	14.69	13.43	29.92	32.44	28.3	64.15	62.19	62.37	161.08	161.4	153.39	321.76	317.38	317.84	92.5	92.1	91.4	92.5	92.5	92.5	92.5	92.5	92.5	92.5	92.5	92.5	92.5	92.5	92.5	92.5	92.5	92.5	0.99	0.99	0.98	0.98	0.99	0.99	1	1
43	L-Tyrosine [M+H]+ C9H11NO3 NIST 1075803	MS2	M+H	91.0542	92.13	33.83	59.26	32.44	57.64	55.02	54.58	91.71	96.15	90.96	155.47	152.72	167.1	370.24	311.82	366.84	571.96	582.24	538.29	92.5	92.1	91.4	92.5	92.5	92.5	92.5	92.5	92.5	92.5	92.5	92.5	92.5	92.5	92.5	92.5	92.5	92.5	0.99	0.99	0.98	0.98	0.99	0.99	1	1
43	L-Tyrosine [M+H]+ C9H11NO3 NIST 1075803	MS2	M+H	136.075	92.13	9.1	12.04	7.19	19.43	23.84	25.76	48.69	50.63	53.65	103.27	107.02	95.99	184.02	225.01	224.76	406.26	418.42	382.31	92.5	92.1	91.4	92.5	92.5	92.5	92.5	92.5	92.5	92.5	92.5	92.5	92.5	92.5	92.5	92.5	92.5	92.5	0.99	0.99	0.98	0.98	0.99	0.99	1	1
43	L-Tyrosine [M+H]+ C9H11NO3 NIST 1075803	MS2	M+H	119.049	92.13	6.8	10.78	9	15.84	19.1	18.52	36.69	40.21	41.41	67.64	71.44	79.2	169.11	165.07	181.77	297.93	332.04	292.32	92.5	92.1	91.4	92.5	92.5	92.5	92.5	92.5	92.5	92.5	92.5	92.5	92.5	92.5	92.5	92.5	92.5	92.5	0.99	0.99	0.98	0.98	0.99	0.99	1	1
43	L-Tyrosine [M+H]+ C9H11NO3 NIST 1075803	MS2	M+H	123.044	92.13	6.8	12.91	6.56	16.1	16.55	17.86	32.89	32.48	34.57	65.02	72.36	73.47	153.16	163.94	175.28	286.64	335.2	285.16	92.5	92.1	91.4	92.5	92.5	92.5	92.5	92.5	92.5	92.5	92.5	92.5	92.5	92.5	92.5	92.5	92.5	92.5	0.99	0.99	0.98	0.98	0.99	0.99	1	1
43	L-Tyrosine [M+H]+ C9H11NO3 NIST 1075803	MS2	M+H	95.0491	92.13	8.58	13.36	8.36	17.13	17.9	15.85	29.82	30.37	29.88	56.03	54.13	59.76	135.01	113.6	139.99	221.23	247.9	223.06	92.5	92.1	91.4	92.5	92.5	92.5	92.5	92.5	92.5	92.5	92.5	92.5	92.5	92.5	92.5	92.5	92.5	92.5	0.99	0.99	0.98	0.98	0.99	0.99	1	1
43	L-Tyrosine [M+H]+ C9H11NO3 NIST 1075803	MS2	M+H	165.055	92.13	2.59	3.9	1.16	4.65	6.42	6	13.18	9.7	12.37	20.11	21.36	22.26	28.05	43.39	47.76	84.25	80.14	67.6	92.5	92.1	91.4	92.5	92.5	92.5	92.5	92.5	92.5	92.5	92.5	92.5	92.5	92.5	92.5	92.5	92.5	92.5	0.99	0.99	0.98	0.98	0.99	0.99	1	1
44	Phosphocholine C5H14NO4P	MS1	M+H	184.073	64.81	12.68	11.91	12.6	21.84	20.43	19.51	52.9	54.38	45.34	74.26	74.43	73.3	161.14	156.2	163.34	291.11	298.57	292.88	64.8	64.8	64.8	64.8	64.8	64.8	69.4	67.2	66.1	66.1	66.1	66.1	66.1	65	66.1	66.1	66.1	65	0.83	0.84	0.88	0.92	0.96	0.96	0.98	0.95
44	Phosphocholine C5H14NO4P	MS2	M+H	124.999	64.81	3.07	1.47	4.59	5.81	5.42	6.31	14.85	16.6	13.64	30.85	30.07	28.35	63.72	73.02	64.3	128.08	133.28	126.4	64.8	64.8	64.8	64.8	64.8	64.8	69.4	67.2	66.1	66.1	66.1	66.1	66.1	65	66.1	66.1	66.1	65	0.83	0.84	0.88	0.92	0.96	0.96	0.98	0.95
44	Phosphocholine C5H14NO4P	MS2	M+H	184.074	64.81	5.87	8.37	5.88	10.12	11.09	10.54	26.38	23.01	20.84	35.21	36.63	27.57	59.22	67.58	66.63	135	106.27	114.81	64.8	64.8	64.8	64.8	64.8	64.8	69.4	67.2	66.1	66.1	66.1	66.1	66.1	65	66.1	66.1	66.1	65	0.83	0.84	0.88	0.92	0.96	0.96	0.98	0.95
44	Phosphocholine C5H14NO4P	MS2	M+H	98.9847	64.81	5.43	6.17	3.14	11.99	13.18	12.9	25.96	25.86	22.27	41.38	47.72	43.65	97.84	100.96	109.22	192.3	198.41	174.71	64.8	64.8	64.8	64.8	64.8	64.8	69.4	67.2	66.1	66.1	66.1	66.1	66.1	65	66.1	66.1	66.1	65	0.83	0.84	0.88	0.92	0.96	0.96	0.98	0.95
44	Phosphocholine C5H14NO4P	MS2	M+H	86.0967	64.81	1.75	2.75	2.48	4.16	4.01	4.73	9.67	12.54	13.61	23.16	20.34	17.84	44.58	42.36	44.87	91.15	83.88	88.74	64.8	64.8	64.8	64.8	64.8	64.8	69.4	67.2	66.1	66.1	66.1	66.1	66.1	65	66.1	66.1	66.1	65	0.83	0.84	0.88	0.92	0.96	0.96	0.98	0.95
44	Phosphocholine C5H14NO4P	MS2	M+H	71.0744	64.81	1.03	2.61	1.96	3.05	3.52	3.28	7.71	6.68	5.51	12.83	9.85	10.02	22.87	21.98	20.63	37.46	41.41	35.03	64.8	64.8	64.8	64.8	64.8	64.8	69.4	67.2	66.1	66.1	66.1	66.1	66.1	65	66.1	66.1	66.1	65	0.83	0.84	0.88	0.92	0.96	0.96	0.98	0.95
44	Phosphocholine C5H14NO4P	MS2	M+H	45.0336	64.81	17.22	15.36	15.82	16.09	16.31	15.18	39.82	34.77	25.11	30.59	26.23	26.11	31.93	31.78	32.95	36.16	36.38	35.11	64.8	64.8	64.8	64.8	64.8	64.8	69.4	67.2	66.1	66.1	66.1	66.1	66.1	65	66.1	66.1	66.1	65	0.83	0.84	0.88	0.92	0.96	0.96	0.98	0.95
45	3-Indoleacrylic acid [M+H]+ C11H9NO2 NIST 1057331	MS1	M+H	188.07	268.73	3.06	4.09		6.38	7.09	7.54	14.83	12.87	13.54	26.61	27.05	24.51	65.27	62.27	67.72	124.66	121.93	125.89	268.7	268.7		268.5	267.4	268.5	268.5	268.5	268.5	268.5	268.5	267.4	268.5	268.5	268.5	268.5	268.5	267.4	0.93	0.92		0.95	0.93	0.89	0.96	0.97
45	3-Indoleacrylic acid [M+H]+ C11H9NO2 NIST 1057331	MS2	M+H	118.065	268.73	6.08	4.8		4.39	4.45	3.59	6.79	6.62	6.26	11.97	8.98	10.74	24.71	20.81	26.93	46.86	44.61	42.63	268.7	268.7		268.5	267.4	268.5	268.5	268.5	268.5	268.5	268.5	267.4	268.5	268.5	268.5	268.5	268.5	267.4	0.93	0.92		0.95	0.93	0.89	0.96	0.97
45	3-Indoleacrylic acid [M+H]+ C11H9NO2 NIST 1057331	MS2	M+H	146.06	268.73	6.51	2.94		2.86	3.36	0.89	4.44	4.67	3.63	7.03	8.25	7.22	12.21	13.38	18.16	34.21	31.57	27.04	268.7	268.7		268.5	267.4	268.5	268.5	268.5	268.5	268.5	268.5	267.4	268.5	268.5	268.5	268.5	268.5	267.4	0.93	0.92		0.95	0.93	0.89	0.96	0.97
45	3-Indoleacrylic acid [M+H]+ C11H9NO2 NIST 1057331	MS2	M+H	115.054	268.73	11.27	16.7		5.25	5.6	5.94	6.15	5.86	5.27	7.15	6.16	7.27	9.9	12.1	11.61	12.7	17.53	17.89	268.7	268.7		268.5	267.4	268.5	268.5	268.5	268.5	268.5	268.5	267.4	268.5	268.5	268.5	268.5	268.5	267.4	0.93	0.92		0.95	0.93	0.89	0.96	0.97
45	3-Indoleacrylic acid [M+H]+ C11H9NO2 NIST 1057331	MS2	M+H	144.081	268.73	2.57	3.42		1.5	2.8	2.46	2.68	3.39	3.63	4.22	5.99	2.46	6.6	7.14	6.56	9.86	10.83	12	268.7	268.7		268.5	267.4	268.5	268.5	268.5	268.5	268.5	268.5	267.4	268.5	268.5	268.5	268.5	268.5	267.4	0.93	0.92		0.95	0.93	0.89	0.96	0.97
45	3-Indoleacrylic acid [M+H]+ C11H9NO2 NIST 1057331	MS2	M+H	143.073	268.73	3.41	2.16		2.25	1.88	2.33	1.67	1.95	1.91	5.91	3.78	3.39	9.27	8.61	8.32	12.07	15.17	12.67	268.7	268.7		268.5	267.4	268.5	268.5	268.5	268.5	268.5	268.5	267.4	268.5	268.5	268.5	268.5	268.5	267.4	0.93	0.92		0.95	0.93	0.89	0.96	0.97
45	3-Indoleacrylic acid [M+H]+ C11H9NO2 NIST 1057331	MS2	M+H	91.0551	268.73	37.75	37.96		15.83	13.29	11.49	12.75	11.58	13.34	15.03	12.28	11.39	16.96	16.94	19.49	19.2	21.13	20.57	268.7	268.7		268.5	267.4	268.5	268.5	268.5	268.5	268.5	268.5	267.4	268.5	268.5	268.5	268.5	268.5	267.4	0.93	0.92		0.95	0.93	0.89	0.96	0.97
45	ISF of 3-Indoleacrylic acid [M+H]+ C11H9NO2 NIST 1057331	MS1	-	144.079	267.53												3.08	4.14	2.59	2.99	6.23	5.14	6.1												267.5	267.4	267.4	268.5	268.5	267.4	267.4
45	ISF of 3-Indoleacrylic acid [M+H]+ C11H9NO2 NIST 1057331	MS2	-	84.9591	267.53												26.48	10.25	4.38	4.2	11.26	3.92	8.36												267.5	267.4	267.4	268.5	268.5	267.4	267.4
45	ISF of 3-Indoleacrylic acid [M+H]+ C11H9NO2 NIST 1057331	MS2	-	40.9701	267.53												4.12	1.36	1.27	0.51	1.25	1.09	3.1												267.5	267.4	267.4	268.5	268.5	267.4	267.4
45	ISF of 3-Indoleacrylic acid [M+H]+ C11H9NO2 NIST 1057331	MS2	-	144.081	267.53												2.29	0	0	0.38	1.97	2.35	0.63												267.5	267.4	267.4	268.5	268.5	267.4	267.4
45	ISF of 3-Indoleacrylic acid [M+H]+ C11H9NO2 NIST 1057331	MS2	-	81.9633	267.53												3.58	1.68	0.72	0.89	0	0.63	0.41												267.5	267.4	267.4	268.5	268.5	267.4	267.4
45	ISF of 3-Indoleacrylic acid [M+H]+ C11H9NO2 NIST 1057331	MS2	-	143.071	267.53												0	1.93	0	1.29	3.01	0.66	2.62												267.5	267.4	267.4	268.5	268.5	267.4	267.4
45	ISF of 3-Indoleacrylic acid [M+H]+ C11H9NO2 NIST 1057331	MS2	-	44.0495	267.53												20.72	9.58	4	3.18	10.68	3.56	7.66												267.5	267.4	267.4	268.5	268.5	267.4	267.4
45	ISF of 3-Indoleacrylic acid [M+H]+ C11H9NO2 NIST 1057331	MS1	-	146.059	268.7												4.08	10.26	8.4	8.47	17.59	18.25	17.61												267.4	268.5	267.4	267.4	268.5	268.5	267.4
45	ISF of 3-Indoleacrylic acid [M+H]+ C11H9NO2 NIST 1057331	MS2	-	91.0528	268.7												20.98	24.48	21.63	22.97	21.67	21.29	30.26												267.4	268.5	267.4	267.4	268.5	268.5	267.4
45	ISF of 3-Indoleacrylic acid [M+H]+ C11H9NO2 NIST 1057331	MS2	-	68.9817	268.7												4.47	8.01	5.07	5.95	5.89	4.72	6.02												267.4	268.5	267.4	267.4	268.5	268.5	267.4
45	ISF of 3-Indoleacrylic acid [M+H]+ C11H9NO2 NIST 1057331	MS2	-	56.0481	268.7												2.96	2.71	2.37	2.95	1.95	3.02	2.79												267.4	268.5	267.4	267.4	268.5	268.5	267.4
45	ISF of 3-Indoleacrylic acid [M+H]+ C11H9NO2 NIST 1057331	MS2	-	55.0585	268.7												29.42	37.82	25.83	32.56	30.7	30.98	36.5												267.4	268.5	267.4	267.4	268.5	268.5	267.4
45	ISF of 3-Indoleacrylic acid [M+H]+ C11H9NO2 NIST 1057331	MS2	-	118.062	268.7												0.49	0.95	1.14	1.89	2.95	2.58	3.44												267.4	268.5	267.4	267.4	268.5	268.5	267.4
45	ISF of 3-Indoleacrylic acid [M+H]+ C11H9NO2 NIST 1057331	MS2	-	110.008	268.7												3.24	5.45	5.61	3.52	5.15	4.17	4.82												267.4	268.5	267.4	267.4	268.5	268.5	267.4
46	5-Methoxytryptamine C11H14N2O	MS1	M+H	191.117	495.93	5.15	5.81	5.02	11.83	10.98	11.92	20.01	21.07	18.99	38.34	38.52	37.96	92.05	96.62	96.73	143.01	145.15	148.25	496.2	495.9	495.9	496.2	496.2	496.2	496.2	496.2	496.2	496.2	496.2	496.2	496.2	496.2	496.2	496.2	496.2	496.2	0.93	0.96	0.95	0.9	0.92	0.95	0.97	0.94
46	5-Methoxytryptamine C11H14N2O	MS2	M+H	174.091	495.93	4.37	8.85	12.81	10.03	6.94	10.43	17.54	11.36	13.83	23.24	19.35	22.86	59.69	61.31	56.88	119.69	114.87	110.54	496.2	495.9	495.9	496.2	496.2	496.2	496.2	496.2	496.2	496.2	496.2	496.2	496.2	496.2	496.2	496.2	496.2	496.2	0.93	0.96	0.95	0.9	0.92	0.95	0.97	0.94
46	5-Methoxytryptamine C11H14N2O	MS2	M+H	159.066	495.93	0.7	1.76	1.32	5.01	4.52	4.97	8.1	10.37	9.3	15.01	15.66	12.16	36.73	32.1	35.21	76.47	68.88	72.66	496.2	495.9	495.9	496.2	496.2	496.2	496.2	496.2	496.2	496.2	496.2	496.2	496.2	496.2	496.2	496.2	496.2	496.2	0.93	0.96	0.95	0.9	0.92	0.95	0.97	0.94
46	5-Methoxytryptamine C11H14N2O	MS2	M+H	130.064	495.93	1.11	2.85	2.42	0	1.87	2.26	4.37	3.89	3.26	6.83	4.07	6.15	7.15	9.8	8.59	20.19	13.28	15.84	496.2	495.9	495.9	496.2	496.2	496.2	496.2	496.2	496.2	496.2	496.2	496.2	496.2	496.2	496.2	496.2	496.2	496.2	0.93	0.96	0.95	0.9	0.92	0.95	0.97	0.94
46	5-Methoxytryptamine C11H14N2O	MS2	M+H	131.074	495.93	2.23	2.67	4.25	1.71	2.23	2.75	3.99	6.98	4.06	6.54	3.78	6.72	13.46	8.71	11.83	18.52	19.43	16.63	496.2	495.9	495.9	496.2	496.2	496.2	496.2	496.2	496.2	496.2	496.2	496.2	496.2	496.2	496.2	496.2	496.2	496.2	0.93	0.96	0.95	0.9	0.92	0.95	0.97	0.94
46	5-Methoxytryptamine C11H14N2O	MS2	M+H	143.071	495.93	0	1.46	2.41	1.41	3.34	1.58	3.46	1.79	3.12	5.78	6.44	6.79	9.49	9.59	8.99	15.75	19.2	15.76	496.2	495.9	495.9	496.2	496.2	496.2	496.2	496.2	496.2	496.2	496.2	496.2	496.2	496.2	496.2	496.2	496.2	496.2	0.93	0.96	0.95	0.9	0.92	0.95	0.97	0.94
46	5-Methoxytryptamine C11H14N2O	MS2	M+H	144.079	495.93	0.63	0	2.11	1.96	2.25	2.63	6.31	2.76	2.76	8.83	5.96	4.1	12.06	13.31	10.25	19.6	20.35	21.46	496.2	495.9	495.9	496.2	496.2	496.2	496.2	496.2	496.2	496.2	496.2	496.2	496.2	496.2	496.2	496.2	496.2	496.2	0.93	0.96	0.95	0.9	0.92	0.95	0.97	0.94
46	ISF of 5-Methoxytryptamine C11H14N2O	MS1	-	159.067	495.93	26.43	23.47	24.96	16.88	14.25	15.07	23.04	27.78	24.48	46.58	46.86	44.68	109.67	108.52	112.68	177.39	176.67	177.19	494	494	495.1	496.2	496.2	496.2	496.2	496.2	496.2	496.2	496.2	496.2	496.2	496.2	496.2	496.2	496.2	496.2	0.74	0.78	0.73	0.88	0.9	0.9	0.9	0.95
46	ISF of 5-Methoxytryptamine C11H14N2O	MS2	-	130.065	495.93	33.6	24.47	25.25	9.13	5.92	6.51	9.17	8.33	7.86	14	14.07	17.73	31.34	32.37	31.49	68.27	63.96	61.25	494	494	495.1	496.2	496.2	496.2	496.2	496.2	496.2	496.2	496.2	496.2	496.2	496.2	496.2	496.2	496.2	496.2	0.74	0.78	0.73	0.88	0.9	0.9	0.9	0.95
46	ISF of 5-Methoxytryptamine C11H14N2O	MS2	-	159.067	495.93	0	0	0	0.48	0.44	0.61	1.32	1.67	1.93	2.73	2.9	4.61	6.54	5.09	6.28	15.77	14.97	11.57	494	494	495.1	496.2	496.2	496.2	496.2	496.2	496.2	496.2	496.2	496.2	496.2	496.2	496.2	496.2	496.2	496.2	0.74	0.78	0.73	0.88	0.9	0.9	0.9	0.95
46	ISF of 5-Methoxytryptamine C11H14N2O	MS2	-	131.072	495.93	0	2.39	5.25	0	1.83	1.35	1.59	1.55	2.35	3.47	2.19	4.07	8.08	8.26	6.61	14.35	13.9	12.47	494	494	495.1	496.2	496.2	496.2	496.2	496.2	496.2	496.2	496.2	496.2	496.2	496.2	496.2	496.2	496.2	496.2	0.74	0.78	0.73	0.88	0.9	0.9	0.9	0.95
46	ISF of 5-Methoxytryptamine C11H14N2O	MS2	-	103.055	495.93	20.81	11.62	20.26	3.74	5.27	5.02	5.67	3.94	3.29	5.17	5.75	5.87	6.95	9.42	8.42	12.38	13.02	12.48	494	494	495.1	496.2	496.2	496.2	496.2	496.2	496.2	496.2	496.2	496.2	496.2	496.2	496.2	496.2	496.2	496.2	0.74	0.78	0.73	0.88	0.9	0.9	0.9	0.95
46	ISF of 5-Methoxytryptamine C11H14N2O	MS2	-	158.06	495.93	0	0	0	0.26	0	0.17	0.26	0	0.09	0.35	0.44	0	3.37	2.5	1.13	2.45	3.85	3.63	494	494	495.1	496.2	496.2	496.2	496.2	496.2	496.2	496.2	496.2	496.2	496.2	496.2	496.2	496.2	496.2	496.2	0.74	0.78	0.73	0.88	0.9	0.9	0.9	0.95
46	ISF of 5-Methoxytryptamine C11H14N2O	MS2	-	131.048	495.93	8.25	6.57	6.92	0	0.68	0.64	0	0.72	1.55	1.99	0	2.71	2.54	2.59	2.51	4.42	1.66	2.68	494	494	495.1	496.2	496.2	496.2	496.2	496.2	496.2	496.2	496.2	496.2	496.2	496.2	496.2	496.2	496.2	496.2	0.74	0.78	0.73	0.88	0.9	0.9	0.9	0.95
46	ISF of 5-Methoxytryptamine C11H14N2O	MS1	-	174.091	495.93	220.6	208.08	210.18	553.55	564.09	533.83	988.7	1068.06	1012.8	1928.24	1965.37	1867.84	4851.41	4867.88	5092.94	7869.93	8100.13	8316.6	496.2	496.2	496.2	496.2	496.2	496.2	496.2	496.2	496.2	496.2	496.2	496.2	496.2	496.2	496.2	496.2	496.2	496.2	1	1	0.99	1	1	0.99	1	1
46	ISF of 5-Methoxytryptamine C11H14N2O	MS2	-	174.092	495.93	25.61	25.55	16.52	67.95	81.64	64.47	150.81	148.51	136.12	312.63	226.18	254.36	581.97	615.61	616.66	1233.86	1265.47	1132.08	496.2	496.2	496.2	496.2	496.2	496.2	496.2	496.2	496.2	496.2	496.2	496.2	496.2	496.2	496.2	496.2	496.2	496.2	1	1	0.99	1	1	0.99	1	1
46	ISF of 5-Methoxytryptamine C11H14N2O	MS2	-	159.068	495.93	22.26	20.21	18.81	59.67	58.13	56.14	149.72	150.63	126.83	258.53	236.54	245.39	599.62	617.44	588.34	1169.26	1175.97	1030.92	496.2	496.2	496.2	496.2	496.2	496.2	496.2	496.2	496.2	496.2	496.2	496.2	496.2	496.2	496.2	496.2	496.2	496.2	1	1	0.99	1	1	0.99	1	1
46	ISF of 5-Methoxytryptamine C11H14N2O	MS2	-	130.065	495.93	19.18	15.6	21.94	47.25	50.69	55.53	144.14	107.89	121.87	179.87	225.29	204.79	495.3	520.6	440.66	865.92	946.39	840.1	496.2	496.2	496.2	496.2	496.2	496.2	496.2	496.2	496.2	496.2	496.2	496.2	496.2	496.2	496.2	496.2	496.2	496.2	1	1	0.99	1	1	0.99	1	1
46	ISF of 5-Methoxytryptamine C11H14N2O	MS2	-	131.073	495.93	17.25	16.28	18.06	45.72	48.6	49.01	132.48	105.57	113.42	193.29	202.43	190.93	501.94	499.34	430.37	843.54	947.32	815.52	496.2	496.2	496.2	496.2	496.2	496.2	496.2	496.2	496.2	496.2	496.2	496.2	496.2	496.2	496.2	496.2	496.2	496.2	1	1	0.99	1	1	0.99	1	1
46	ISF of 5-Methoxytryptamine C11H14N2O	MS2	-	143.073	495.93	9.36	11.35	10.21	25.87	26.35	27.79	69.45	64.54	55.69	106.59	115.5	114.77	289.07	298.5	269.84	519.39	543.03	479.72	496.2	496.2	496.2	496.2	496.2	496.2	496.2	496.2	496.2	496.2	496.2	496.2	496.2	496.2	496.2	496.2	496.2	496.2	1	1	0.99	1	1	0.99	1	1
46	ISF of 5-Methoxytryptamine C11H14N2O	MS2	-	115.054	495.93	6.08	6.38	7.44	11.21	10.64	9.72	23.52	16.99	20.54	29.91	33.01	31.5	82.29	82.22	70.2	130.81	162.43	140.81	496.2	496.2	496.2	496.2	496.2	496.2	496.2	496.2	496.2	496.2	496.2	496.2	496.2	496.2	496.2	496.2	496.2	496.2	1	1	0.99	1	1	0.99	1	1
47	Diethyltoluamide [M+H]+ C12H17NO NIST 1198823	MS1	M+H	192.138	629.43	9.32	8.73	10.68	11.81	11.83	9.51	10.12	7.88	10.79	12.22	10.27	10.71	12.06	11.26	8.85	10.09	8.72	10.24	629.3	629.3	628.2	630.4	629.3	629.3	629.3	629.3	629.3	629.3	629.3	629.3	629.3	629.3	629.3	629.3	629.3	629.3	0.97	0.96	0.98	0.96	0.98	0.96	0.98	0.95
47	Diethyltoluamide [M+H]+ C12H17NO NIST 1198823	MS2	M+H	119.049	629.43	8.74	9.07	11.53	8.25	11.67	9.23	9.65	8.36	12.2	6.94	9.34	11.88	11.94	10.51	8.52	11.79	8.73	9.58	629.3	629.3	628.2	630.4	629.3	629.3	629.3	629.3	629.3	629.3	629.3	629.3	629.3	629.3	629.3	629.3	629.3	629.3	0.97	0.96	0.98	0.96	0.98	0.96	0.98	0.95
47	Diethyltoluamide [M+H]+ C12H17NO NIST 1198823	MS2	M+H	91.0537	629.43	17.73	23.03	21.28	24.36	22.01	21.47	17.39	15.07	24.49	21.91	14.76	24.31	24.4	24.92	18.21	18.92	17.11	20.01	629.3	629.3	628.2	630.4	629.3	629.3	629.3	629.3	629.3	629.3	629.3	629.3	629.3	629.3	629.3	629.3	629.3	629.3	0.97	0.96	0.98	0.96	0.98	0.96	0.98	0.95
47	Diethyltoluamide [M+H]+ C12H17NO NIST 1198823	MS2	M+H	192.175	629.43	9.69	16.15	10.58	12.82	17.85	10.1	11.2	8.87	13.66	11.38	6.68	15.94	11.6	14.86	8.05	8.63	9.46	8.21	629.3	629.3	628.2	630.4	629.3	629.3	629.3	629.3	629.3	629.3	629.3	629.3	629.3	629.3	629.3	629.3	629.3	629.3	0.97	0.96	0.98	0.96	0.98	0.96	0.98	0.95
47	Diethyltoluamide [M+H]+ C12H17NO NIST 1198823	MS2	M+H	192.138	629.43	3.81	2.99	3.32	5.65	4.34	3.23	2.51	2.77	4.65	5.08	4.73	7.82	4.58	5.78	2.36	4.48	4.29	5.1	629.3	629.3	628.2	630.4	629.3	629.3	629.3	629.3	629.3	629.3	629.3	629.3	629.3	629.3	629.3	629.3	629.3	629.3	0.97	0.96	0.98	0.96	0.98	0.96	0.98	0.95
47	Diethyltoluamide [M+H]+ C12H17NO NIST 1198823	MS2	M+H	148.112	629.43	10.04	15.91	17.83	12.27	15.59	11.88	10.4	11.7	15.85	14.06	8.95	12.9	12.98	13.37	10.16	10.55	7.68	13.46	629.3	629.3	628.2	630.4	629.3	629.3	629.3	629.3	629.3	629.3	629.3	629.3	629.3	629.3	629.3	629.3	629.3	629.3	0.97	0.96	0.98	0.96	0.98	0.96	0.98	0.95
47	Diethyltoluamide [M+H]+ C12H17NO NIST 1198823	MS2	M+H	134.096	629.43	10.01	11.96	13.27	10.03	14.21	11.68	9.66	9.08	10.03	10.93	8.07	14.18	11.69	13.12	7.04	10.51	6.9	10.91	629.3	629.3	628.2	630.4	629.3	629.3	629.3	629.3	629.3	629.3	629.3	629.3	629.3	629.3	629.3	629.3	629.3	629.3	0.97	0.96	0.98	0.96	0.98	0.96	0.98	0.95
48	Citric acid [M+H]+ C6H8O7 NIST 1058882---Citric acid [M+H]+ C6H8O7 NIST 1058883	MS1	M+H	193.033	893.72	33.29	35.08	30.17	28.67	31.92	32.62	33.3	31.3	30.94	30.7	34.17	28.13	33.08	29.53	28.45	30	32.13	30.52	893.7	893.7	893.7	893.7	893.7	893.7	893.7	893.7	893.7	893.7	893.7	893.7	893.7	893.7	893.7	893.7	893.7	893.7	0.96	0.98	0.97	0.97	0.93	0.96	0.97	0.96
48	Citric acid [M+H]+ C6H8O7 NIST 1058882---Citric acid [M+H]+ C6H8O7 NIST 1058883	MS2	M+H	68.9973	893.72	67.76	65.04	69.98	69.01	61.17	52.34	68.74	66.12	69.56	60.06	63.93	71.5	59.15	66.52	62.71	64.13	59.71	57.5	893.7	893.7	893.7	893.7	893.7	893.7	893.7	893.7	893.7	893.7	893.7	893.7	893.7	893.7	893.7	893.7	893.7	893.7	0.96	0.98	0.97	0.97	0.93	0.96	0.97	0.96
48	Citric acid [M+H]+ C6H8O7 NIST 1058882---Citric acid [M+H]+ C6H8O7 NIST 1058883	MS2	M+H	111.008	893.72	137.17	129.76	138.46	126.96	134.85	128.3	146.8	139.99	130.92	137.73	137.89	127.2	132.4	142.31	128.07	131.68	141.93	121.88	893.7	893.7	893.7	893.7	893.7	893.7	893.7	893.7	893.7	893.7	893.7	893.7	893.7	893.7	893.7	893.7	893.7	893.7	0.96	0.98	0.97	0.97	0.93	0.96	0.97	0.96
48	Citric acid [M+H]+ C6H8O7 NIST 1058882---Citric acid [M+H]+ C6H8O7 NIST 1058883	MS2	M+H	139.001	893.72	148.61	132.07	151.9	141.88	159.34	150.82	152.36	149.24	149.04	138.31	142.97	136.62	156.74	152.69	134.21	147.3	133.15	151.22	893.7	893.7	893.7	893.7	893.7	893.7	893.7	893.7	893.7	893.7	893.7	893.7	893.7	893.7	893.7	893.7	893.7	893.7	0.96	0.98	0.97	0.97	0.93	0.96	0.97	0.96
48	Citric acid [M+H]+ C6H8O7 NIST 1058882---Citric acid [M+H]+ C6H8O7 NIST 1058883	MS2	M+H	129.019	893.72	82.5	70.21	91.17	73.66	84.71	75.92	83.4	94.85	82.59	82.01	76.33	71.62	89.63	72.86	81.92	82.77	72.73	80.6	893.7	893.7	893.7	893.7	893.7	893.7	893.7	893.7	893.7	893.7	893.7	893.7	893.7	893.7	893.7	893.7	893.7	893.7	0.96	0.98	0.97	0.97	0.93	0.96	0.97	0.96
48	Citric acid [M+H]+ C6H8O7 NIST 1058882---Citric acid [M+H]+ C6H8O7 NIST 1058883	MS2	M+H	43.0185	893.72	31.22	31.21	32.72	34.62	31.14	28.73	35.29	35.4	33.91	32.14	30.07	31.85	33.18	36.17	33.03	33.64	36.39	29.4	893.7	893.7	893.7	893.7	893.7	893.7	893.7	893.7	893.7	893.7	893.7	893.7	893.7	893.7	893.7	893.7	893.7	893.7	0.96	0.98	0.97	0.97	0.93	0.96	0.97	0.96
48	Citric acid [M+H]+ C6H8O7 NIST 1058882---Citric acid [M+H]+ C6H8O7 NIST 1058883	MS2	M+H	87.0069	893.72	11.8	9.94	11.63	12.67	10.16	10.01	10.87	12.79	11.8	10.5	12.88	11.57	11.74	11.89	11.1	9.47	9.34	8.83	893.7	893.7	893.7	893.7	893.7	893.7	893.7	893.7	893.7	893.7	893.7	893.7	893.7	893.7	893.7	893.7	893.7	893.7	0.96	0.98	0.97	0.97	0.93	0.96	0.97	0.96
49	Caffeine C8H10N4O2	MS1	M+H	195.087	388.06	94.87	88.37	79.3	172.52	195.24	179.34	358.98	350.53	343.59	624.37	615.22	690.47	1627.23	1690.69	1688.03	3091.18	3075.3	3095.34	388.4	388.4	388.4	387.3	387.3	388.4	387.3	387.3	387.3	387.3	387.3	387.3	387.3	387.3	387.3	388.4	387.3	387.3	1	1	1	1	1	1	1	1
49	Caffeine C8H10N4O2	MS2	M+H	195.088	388.06	57.39	76.81	69.77	143.8	173.17	149.18	312.57	326.4	369.83	617.43	594.24	644.9	1509.17	1711.63	1358.9	2859.49	2927.49	3226.06	388.4	388.4	388.4	387.3	387.3	388.4	387.3	387.3	387.3	387.3	387.3	387.3	387.3	387.3	387.3	388.4	387.3	387.3	1	1	1	1	1	1	1	1
49	Caffeine C8H10N4O2	MS2	M+H	138.066	388.06	48.89	55.93	54.96	128.02	158.2	123.78	305.93	271.88	289.4	509.75	509.97	632.85	1401.54	1379.02	1282.5	2860.4	2731.66	2720.7	388.4	388.4	388.4	387.3	387.3	388.4	387.3	387.3	387.3	387.3	387.3	387.3	387.3	387.3	387.3	388.4	387.3	387.3	1	1	1	1	1	1	1	1
49	Caffeine C8H10N4O2	MS2	M+H	110.071	388.06	13.89	13.7	12.61	33.71	37.94	30.48	81.39	61.36	70.85	133.53	147.07	136.37	392.28	384.34	350.45	689.97	713.06	719.32	388.4	388.4	388.4	387.3	387.3	388.4	387.3	387.3	387.3	387.3	387.3	387.3	387.3	387.3	387.3	388.4	387.3	387.3	1	1	1	1	1	1	1	1
49	Caffeine C8H10N4O2	MS2	M+H	42.034	388.06	8.16	8.63	8.41	17.93	17.42	17.34	28.21	19.91	32.77	49.94	60.06	52.03	159.97	139.24	135.83	298.58	259.92	272.59	388.4	388.4	388.4	387.3	387.3	388.4	387.3	387.3	387.3	387.3	387.3	387.3	387.3	387.3	387.3	388.4	387.3	387.3	1	1	1	1	1	1	1	1
49	Caffeine C8H10N4O2	MS2	M+H	123.042	388.06	2.86	3.78	3.48	7.81	8.31	5.99	14.87	10.58	14.98	27.41	28.57	28.49	88.93	82.31	78.21	160.98	159.88	164.79	388.4	388.4	388.4	387.3	387.3	388.4	387.3	387.3	387.3	387.3	387.3	387.3	387.3	387.3	387.3	388.4	387.3	387.3	1	1	1	1	1	1	1	1
49	Caffeine C8H10N4O2	MS2	M+H	83.0602	388.06	2.6	3.87	4.54	8.26	7.65	12.94	19.02	12.66	20.51	32.04	34.82	32.71	107.17	96.02	90.94	192.9	169.93	169.4	388.4	388.4	388.4	387.3	387.3	388.4	387.3	387.3	387.3	387.3	387.3	387.3	387.3	387.3	387.3	388.4	387.3	387.3	1	1	1	1	1	1	1	1
49	ISF of Caffeine C8H10N4O2	MS1	-	110.07	387.97	2.5		3.08		3.39	1.78	4.4	2.99	2.54	4.18	2.29	2.75	5.01	5.11	4.25	5.76	7.24	5.93	388		388		388	388	388	388	388	388	388	388	388	388	388.4	388.4	387.3	387.3	0.65		0.71		0.74	0.83	0.85	0.77
49	ISF of Caffeine C8H10N4O2	MS2	-	68.9833	387.97	15.39		14.32		15.82	18.03	18.03	14.82	14.57	14.66	16.91	15.83	15.93	17.43	4.08	6.25	5.04	5.32	388		388		388	388	388	388	388	388	388	388	388	388	388.4	388.4	387.3	387.3	0.65		0.71		0.74	0.83	0.85	0.77
49	ISF of Caffeine C8H10N4O2	MS2	-	110.062	387.97	0		0		0	0.95	1.38	0	1.75	0	0	0	1.24	0	0	0	0	0	388		388		388	388	388	388	388	388	388	388	388	388	388.4	388.4	387.3	387.3	0.65		0.71		0.74	0.83	0.85	0.77
49	ISF of Caffeine C8H10N4O2	MS2	-	94.0653	387.97	9.54		8.12		8.08	6.78	7.39	7.69	6.82	7.39	9.23	5.84	7.08	8.69	3.82	2.97	2.48	3.3	388		388		388	388	388	388	388	388	388	388	388	388	388.4	388.4	387.3	387.3	0.65		0.71		0.74	0.83	0.85	0.77
49	ISF of Caffeine C8H10N4O2	MS2	-	95.0743	387.97	0		1.66		2.13	2.36	3.05	1.76	3.52	1.9	1.38	2.63	0	2.79	0.27	2.22	0	1.38	388		388		388	388	388	388	388	388	388	388	388	388	388.4	388.4	387.3	387.3	0.65		0.71		0.74	0.83	0.85	0.77
49	ISF of Caffeine C8H10N4O2	MS2	-	42.0331	387.97	39.46		38.57		38.31	37.28	38.99	41.37	37.98	40.78	38.67	38.38	37.61	37.63	10.34	14.54	15.56	11.73	388		388		388	388	388	388	388	388	388	388	388	388	388.4	388.4	387.3	387.3	0.65		0.71		0.74	0.83	0.85	0.77
49	ISF of Caffeine C8H10N4O2	MS2	-	41.0259	387.97	0		0		0	0	0	0.18	0	0	0.18	0	0	0	0	0	0	0	388		388		388	388	388	388	388	388	388	388	388	388	388.4	388.4	387.3	387.3	0.65		0.71		0.74	0.83	0.85	0.77
50	Tetraethylene glycol [M+H]+ C8H18O5 NIST 1065723	MS1	M+H	195.122	290.59	38.2	36.82	35.04	35.87	35.8	34.51	36.87	23.96	43.5	37.06	31.64	36.91	32.19	38.84	34.32	37.36	38.68	38.59	294.9	294.9	294.9	294.9	293.8	293.8	291.6	290.6	294.9	293.8	293.8	294.9	292.7	294.9	291.6	290.5	290.5	290.5	0.96	0.97	0.93	0.95	0.97	0.95	0.95	0.98
50	Tetraethylene glycol [M+H]+ C8H18O5 NIST 1065723	MS2	M+H	45.0336	290.59	99.44	98.09	92.79	95.68	92.41	89.47	108.28	55.5	107.78	93.19	88.58	93.07	75.93	98.82	85.62	56.55	54.14	69.33	294.9	294.9	294.9	294.9	293.8	293.8	291.6	290.6	294.9	293.8	293.8	294.9	292.7	294.9	291.6	290.5	290.5	290.5	0.96	0.97	0.93	0.95	0.97	0.95	0.95	0.98
50	Tetraethylene glycol [M+H]+ C8H18O5 NIST 1065723	MS2	M+H	89.0597	290.59	40.47	38.74	33.16	36.85	39.24	35.61	45.9	20.88	45.56	39.87	35.41	38.01	29.75	40.92	33.32	22.6	22.42	25.45	294.9	294.9	294.9	294.9	293.8	293.8	291.6	290.6	294.9	293.8	293.8	294.9	292.7	294.9	291.6	290.5	290.5	290.5	0.96	0.97	0.93	0.95	0.97	0.95	0.95	0.98
50	Tetraethylene glycol [M+H]+ C8H18O5 NIST 1065723	MS2	M+H	133.085	290.59	2.96	3.61	0	4.21	3.33	0	5.13	3.08	3.77	0	0	0	0	0	3.18	3.87	4.29	5.33	294.9	294.9	294.9	294.9	293.8	293.8	291.6	290.6	294.9	293.8	293.8	294.9	292.7	294.9	291.6	290.5	290.5	290.5	0.96	0.97	0.93	0.95	0.97	0.95	0.95	0.98
50	Tetraethylene glycol [M+H]+ C8H18O5 NIST 1065723	MS2	M+H	109.958	290.59	10.44	9.63	9.16	9.28	10.47	9.23	11.06	5.68	10.47	9.71	8.56	9.59	8.24	10.66	9.38	3.49	4.96	4.23	294.9	294.9	294.9	294.9	293.8	293.8	291.6	290.6	294.9	293.8	293.8	294.9	292.7	294.9	291.6	290.5	290.5	290.5	0.96	0.97	0.93	0.95	0.97	0.95	0.95	0.98
50	Tetraethylene glycol [M+H]+ C8H18O5 NIST 1065723	MS2	M+H	195.085	290.59	0	0	0	0	0	5.64	0	2.73	0	6.79	3.78	0	4.12	6.67	2.43	3.11	2.04	2.42	294.9	294.9	294.9	294.9	293.8	293.8	291.6	290.6	294.9	293.8	293.8	294.9	292.7	294.9	291.6	290.5	290.5	290.5	0.96	0.97	0.93	0.95	0.97	0.95	0.95	0.98
50	Tetraethylene glycol [M+H]+ C8H18O5 NIST 1065723	MS2	M+H	195.119	290.59	0	7.95	8.11	16.06	8.84	11.15	12.02	4.47	10.81	12.78	9.62	6.5	9.12	12.82	10.57	6.82	5.51	4.09	294.9	294.9	294.9	294.9	293.8	293.8	291.6	290.6	294.9	293.8	293.8	294.9	292.7	294.9	291.6	290.5	290.5	290.5	0.96	0.97	0.93	0.95	0.97	0.95	0.95	0.98
51	Tetraethylene glycol [M+H]+ C8H18O5 NIST 1065722	MS1	M+H	195.122	774.62	40.22	39.13	45.31	39.36	38.63	38.09	39.05	34.82	34.37	34.83	36.84	36.72	38.04	41.11	38.42	37.79	37.84	38.23	774.5	774.5	774.6	774.5	774.5	774.5	774.5	774.5	774.5	774.5	774.5	774.5	774.5	774.5	773.4	774.5	773.4	774.5	0.91	0.88	0.81	0.91	0.84	0.93	0.83	0.92
51	Tetraethylene glycol [M+H]+ C8H18O5 NIST 1065722	MS2	M+H	195.185	774.62	4.95	2.82	5.67	3.64	4.47	5.98	2.87	5.43	0	3.78	3.23	3.06	4.03	0	3.01	4.7	7.29	5.11	774.5	774.5	774.6	774.5	774.5	774.5	774.5	774.5	774.5	774.5	774.5	774.5	774.5	774.5	773.4	774.5	773.4	774.5	0.91	0.88	0.81	0.91	0.84	0.93	0.83	0.92
51	Tetraethylene glycol [M+H]+ C8H18O5 NIST 1065722	MS2	M+H	166.133	774.62	16.52	14.52	23.16	19.5	18.23	14.67	15.79	19.29	12.68	17.35	11.29	17.94	16.27	18.11	13.82	19.77	19.01	18.99	774.5	774.5	774.6	774.5	774.5	774.5	774.5	774.5	774.5	774.5	774.5	774.5	774.5	774.5	773.4	774.5	773.4	774.5	0.91	0.88	0.81	0.91	0.84	0.93	0.83	0.92
51	Tetraethylene glycol [M+H]+ C8H18O5 NIST 1065722	MS2	M+H	195.157	774.62	3.35	5.05	0	7.21	4.9	4.85	3.59	5.77	4.08	3.79	4.03	5.78	5.44	4.19	5.15	5.4	6.74	6.23	774.5	774.5	774.6	774.5	774.5	774.5	774.5	774.5	774.5	774.5	774.5	774.5	774.5	774.5	773.4	774.5	773.4	774.5	0.91	0.88	0.81	0.91	0.84	0.93	0.83	0.92
51	Tetraethylene glycol [M+H]+ C8H18O5 NIST 1065722	MS2	M+H	89.0603	774.62	9.47	10.65	11.83	9.78	10.01	10.76	10.79	10.68	8.51	10.75	10.14	12.69	9.56	11.16	9.13	9.59	8.11	8.79	774.5	774.5	774.6	774.5	774.5	774.5	774.5	774.5	774.5	774.5	774.5	774.5	774.5	774.5	773.4	774.5	773.4	774.5	0.91	0.88	0.81	0.91	0.84	0.93	0.83	0.92
51	Tetraethylene glycol [M+H]+ C8H18O5 NIST 1065722	MS2	M+H	45.0359	774.62	43.83	41.97	66.25	42.1	46.09	38.93	44.71	45.01	33.46	42.77	42.74	41.09	41.31	43.06	39.48	43.86	44.67	43.21	774.5	774.5	774.6	774.5	774.5	774.5	774.5	774.5	774.5	774.5	774.5	774.5	774.5	774.5	773.4	774.5	773.4	774.5	0.91	0.88	0.81	0.91	0.84	0.93	0.83	0.92
51	Tetraethylene glycol [M+H]+ C8H18O5 NIST 1065722	MS2	M+H	166.16	774.62	32.29	31.24	45.31	32.62	33.49	33.84	27.02	31.66	27.2	34.68	28.84	36.59	33.77	37.17	26.92	33.76	32.76	31.62	774.5	774.5	774.6	774.5	774.5	774.5	774.5	774.5	774.5	774.5	774.5	774.5	774.5	774.5	773.4	774.5	773.4	774.5	0.91	0.88	0.81	0.91	0.84	0.93	0.83	0.92
52	NCGC00015088-09_C12H14N2O_N-[2-(1H-Indol-3-yl)ethyl]acetamide C12H14N2O	MS1	M+H	203.117	507.96			2.5		3.65		6.83	4.89	2.61		6.56	6.32	10.25	8.45	12.4	16.66	18.26	19.35			508		508		508	508	508		508.3	508	508.3	508.3	508.3	508.3	508.3	508.3			0.69		0.8		0.91	0.84
52	NCGC00015088-09_C12H14N2O_N-[2-(1H-Indol-3-yl)ethyl]acetamide C12H14N2O	MS2	M+H	144.081	507.96			2.01		7.47		11.83	12.41	9.5		13.54	18.52	42.73	21.02	39.64	66.51	71.64	79.91			508		508		508	508	508		508.3	508	508.3	508.3	508.3	508.3	508.3	508.3			0.69		0.8		0.91	0.84
52	NCGC00015088-09_C12H14N2O_N-[2-(1H-Indol-3-yl)ethyl]acetamide C12H14N2O	MS2	M+H	117.071	507.96			6.75		9.17		8.74	8.58	10.36		3.92	9.98	6.16	3.26	6.41	6.6	10.86	9.5			508		508		508	508	508		508.3	508	508.3	508.3	508.3	508.3	508.3	508.3			0.69		0.8		0.91	0.84
52	NCGC00015088-09_C12H14N2O_N-[2-(1H-Indol-3-yl)ethyl]acetamide C12H14N2O	MS2	M+H	143.072	507.96			2.75		3.46		5.9	5.49	4.35		1.33	7.87	4.95	3.76	5.62	8.33	10.34	6.9			508		508		508	508	508		508.3	508	508.3	508.3	508.3	508.3	508.3	508.3			0.69		0.8		0.91	0.84
52	NCGC00015088-09_C12H14N2O_N-[2-(1H-Indol-3-yl)ethyl]acetamide C12H14N2O	MS2	M+H	127.054	507.96			1.02		1.8		1.1	2.04	2		0.9	1.25	2.97	2.65	2	3.41	5.69	2.92			508		508		508	508	508		508.3	508	508.3	508.3	508.3	508.3	508.3	508.3			0.69		0.8		0.91	0.84
52	NCGC00015088-09_C12H14N2O_N-[2-(1H-Indol-3-yl)ethyl]acetamide C12H14N2O	MS2	M+H	115.055	507.96			4.7		4.63		6.04	4.97	5.9		2.25	7.49	4.74	1.25	4.46	4.43	5.48	3.92			508		508		508	508	508		508.3	508	508.3	508.3	508.3	508.3	508.3	508.3			0.69		0.8		0.91	0.84
52	NCGC00015088-09_C12H14N2O_N-[2-(1H-Indol-3-yl)ethyl]acetamide C12H14N2O	MS2	M+H	203.138	507.96			28		31.97		27.39	30.92	28.67		7.53	26.65	11.04	5.4	15	7.11	9	12.43			508		508		508	508	508		508.3	508	508.3	508.3	508.3	508.3	508.3	508.3			0.69		0.8		0.91	0.84
53	3-Acetamidocoumarin [M+H]+ C11H9NO3 NIST 1227441	MS1	M+H	204.065	139.69	3.85	4.25	4.55	10.7	11.99	11.8	25.99	26.16	24.79	53.62	50.44	50.08	129.15	128.57	124.8	243.94	248.5	248.29	139.7	139.7	139.7	138.7	138.7	138.7	138.7	139.8	138.7	139.8	138.7	136.5	139.8	138.7	138.7	138.7	139.8	138.7	0.9	0.91	0.94	0.99	0.93	0.98	0.97	0.95
53	3-Acetamidocoumarin [M+H]+ C11H9NO3 NIST 1227441	MS2	M+H	162.055	139.69	4.57	5.18	4.7	8	12.69	7.19	17.45	18.26	20.17	31.87	35.49	36.88	89.62	91.62	101.25	174.9	172.79	187.46	139.7	139.7	139.7	138.7	138.7	138.7	138.7	139.8	138.7	139.8	138.7	136.5	139.8	138.7	138.7	138.7	139.8	138.7	0.9	0.91	0.94	0.99	0.93	0.98	0.97	0.95
53	3-Acetamidocoumarin [M+H]+ C11H9NO3 NIST 1227441	MS2	M+H	134.059	139.69	3.26	4.19	3.8	8.43	4.77	8.11	15.33	15.19	13.57	24.76	29.85	28.72	72.66	82	67.47	143.69	149.58	159.16	139.7	139.7	139.7	138.7	138.7	138.7	138.7	139.8	138.7	139.8	138.7	136.5	139.8	138.7	138.7	138.7	139.8	138.7	0.9	0.91	0.94	0.99	0.93	0.98	0.97	0.95
53	3-Acetamidocoumarin [M+H]+ C11H9NO3 NIST 1227441	MS2	M+H	159.069	139.69	1.58	0	0.96	3.06	2.23	3.35	6.94	4.65	7.19	10.96	10.82	11.56	21.4	21.96	21.69	35.07	42.11	41.88	139.7	139.7	139.7	138.7	138.7	138.7	138.7	139.8	138.7	139.8	138.7	136.5	139.8	138.7	138.7	138.7	139.8	138.7	0.9	0.91	0.94	0.99	0.93	0.98	0.97	0.95
53	3-Acetamidocoumarin [M+H]+ C11H9NO3 NIST 1227441	MS2	M+H	204.066	139.69	3.38	3.92	2.34	5.4	7.1	5.43	16.55	16.71	13.28	24.72	20.4	21.82	53.68	62.99	56.88	108.97	92.72	125.89	139.7	139.7	139.7	138.7	138.7	138.7	138.7	139.8	138.7	139.8	138.7	136.5	139.8	138.7	138.7	138.7	139.8	138.7	0.9	0.91	0.94	0.99	0.93	0.98	0.97	0.95
53	3-Acetamidocoumarin [M+H]+ C11H9NO3 NIST 1227441	MS2	M+H	158.06	139.69	0	0.44	0	1.27	1.31	3.06	5.82	5.12	4.55	8.93	7.49	6.53	18.05	18.62	15.14	36.81	36.13	34.93	139.7	139.7	139.7	138.7	138.7	138.7	138.7	139.8	138.7	139.8	138.7	136.5	139.8	138.7	138.7	138.7	139.8	138.7	0.9	0.91	0.94	0.99	0.93	0.98	0.97	0.95
53	3-Acetamidocoumarin [M+H]+ C11H9NO3 NIST 1227441	MS2	M+H	106.066	139.69	5.55	7.2	5.63	5.23	5.31	5.23	5.36	2.69	5.75	7.95	6.28	8.86	13.01	13.66	12.82	24.77	26.08	23.4	139.7	139.7	139.7	138.7	138.7	138.7	138.7	139.8	138.7	139.8	138.7	136.5	139.8	138.7	138.7	138.7	139.8	138.7	0.9	0.91	0.94	0.99	0.93	0.98	0.97	0.95
53	ISF of 3-Acetamidocoumarin [M+H]+ C11H9NO3 NIST 1227441	MS1	-	162.054	139.69									2.15				11.31	11.75	10.85	22.13	20.98	24.49									139.7				139.8	138.7	138.7	138.7	139.8	138.7
53	ISF of 3-Acetamidocoumarin [M+H]+ C11H9NO3 NIST 1227441	MS2	-	84.9586	139.69									39.72				15.88	17.45	18.04	15.9	24.67	16.58									139.7				139.8	138.7	138.7	138.7	139.8	138.7
53	ISF of 3-Acetamidocoumarin [M+H]+ C11H9NO3 NIST 1227441	MS2	-	162.1	139.69									7.71				2.48	2.52	2.56	0	2.48	0									139.7				139.8	138.7	138.7	138.7	139.8	138.7
53	ISF of 3-Acetamidocoumarin [M+H]+ C11H9NO3 NIST 1227441	MS2	-	106.067	139.69									6.73				5.23	5.56	3.98	11.54	12.46	10.51									139.7				139.8	138.7	138.7	138.7	139.8	138.7
53	ISF of 3-Acetamidocoumarin [M+H]+ C11H9NO3 NIST 1227441	MS2	-	134.06	139.69									1.29				4.23	4.36	3.83	15.25	12.58	12.11									139.7				139.8	138.7	138.7	138.7	139.8	138.7
53	ISF of 3-Acetamidocoumarin [M+H]+ C11H9NO3 NIST 1227441	MS2	-	102.892	139.69									5.47				2.83	1.57	1.94	2.4	2.47	1.46									139.7				139.8	138.7	138.7	138.7	139.8	138.7
53	ISF of 3-Acetamidocoumarin [M+H]+ C11H9NO3 NIST 1227441	MS2	-	162.056	139.69									0				3.1	1.95	2.3	7.91	6.04	7.09									139.7				139.8	138.7	138.7	138.7	139.8	138.7
[truncated: 1,168 more rows]
[truncated: 30 more columns]

## Sheet: NegativeMode_Quality
Group	Compound	Type	Correlation	X10ng.ml (CoV %)	X25ng.ml (CoV %)	X50ng.ml (CoV %)	X100ng.ml (CoV %)	X250ng.ml (CoV %)	X500ng.ml (CoV %)
[truncated: 157 more rows]

## Sheet: PositiveMode_Quality
Group	Compound	Type	Correlation	X10ng.ml (Cov %)	X25ng.ml (Cov %)	X50ng.ml (Cov %)	X100ng.ml (Cov %)	X250ng.ml (Cov %)	X500ng.ml (Cov %)
[truncated: 206 more rows]

[truncated: 2 more sheets: MSDIAL-Negative, MSDIAL-Positive]
