# Supplementary material for: MetaboKit: a comprehensive data extraction tool for untargeted metabolomics
Source: Royal Society of Chemistry journal article supplement (doi:10.1039/d0mo00030b), 2020-06-10
Supplement: d0mo00030b6.xlsx [file d0mo00030b6.xlsx]

## Sheet: Legend
Supplementary Table 5
SWATH-MS analysis of mouse liver samples by MetaboKit, followed by product ion quantification and statistical analysis using mapDIA
MetaboKit-Neg-Aqu	Aqueous fraction in negative ionization mode scans analyzed by MetaboKit
MetaboKit-Neg-Org	Organic fraction in negative ionization mode scans analyzed by MetaboKit
MetaboKit-Pos-Aqu	Aqueous fraction in positive ionization mode scans analyzed by MetaboKit
MetaboKit-Pos-Org	Organic fraction in positive ionization mode scans analyzed by MetaboKit
MS1_mapDIA	mapDIA analysis using precursor ion peak area data (including ISF)
MS2_mapDIA	mapDIA analysis using product ion peak area data
MSDIAL-Neg-Aqu	Aqueous fraction in negative ionization mode scans analyzed by MS-DIAL
MSDIAL-Neg-Org	Organic fraction in negative ionization mode scans analyzed by MS-DIAL
MSDIAL-Pos-Aqu	Aqueous fraction in positive ionization mode scans analyzed by MS-DIAL
MSDIAL-Pos-Org	Organic fraction in positive ionization mode scans analyzed by MS-DIAL
SWATH-MS data field description
group	Parent ion and ISF group
ISF	Indicating whether a peak is an ISF
name	Compound name
adduct	Adduct associated with the precursor peak
feature_m/z	Mass-to-charge ratio
KOx	CDK1 knockout mouse x
WTx	Wild type mouse x
RT_x	Retention time of compound identification in sample x
score_x	Spectral library matching score in sample x
mapDIA field description
group	Parent ion and ISF group
compound	Compound name
Quantification Mode	MS1 or MS2
adduct	Adduct associated with the precursor peak
mass	Mass-to-charge ratio
rt(library)	RT marked in the customized spectral library in IDA runs
number of product ions used	Number of product ion quantifiers selected in the fragment selection step of the analysis
Comparison	Which groups are compared
log2FC	Fold change in logarithm scale (base 2)
score	Probability of differential expression
SignedScore	Probability of differential expression multiplied by direction (1 for positive log2FC, -1 for negative log2FC)
FDR	False discovery rate

## Sheet: MetaboKit-Neg-Aqu
group	compound	Quantification Mode	adduct	mass	RT(library)	KO1	KO2	KO3	KO4	KO5	WT1	WT2	WT3	WT4	WT5	RT_KO1	RT_KO2	RT_KO3	RT_KO4	RT_KO5	RT_WT1	RT_WT2	RT_WT3	RT_WT4	RT_WT5	DOTP_KO1	DOTP_KO2	DOTP_KO3	DOTP_KO4	DOTP_KO5	DOTP_WT1	DOTP_WT2	DOTP_WT3	DOTP_WT4	DOTP_WT5	COR_KO1	COR_KO2	COR_KO3	COR_KO4	COR_KO5	COR_WT1	COR_WT2	COR_WT3	COR_WT4	COR_WT5
1	Fumaric acid C4H4O4	MS1	M-H	115.004	56.53	76.43	51.19					55.12	102.6			55.6	55.6					55.6	55.6			1	1					1	1			0.61	0.75					0.6	0.79
1	Fumaric acid C4H4O4	MS2	M-H	71.0135	56.53	3.84	1.42					3.7	2.06			55.6	55.6					55.6	55.6			1	1					1	1			0.61	0.75					0.6	0.79
2	Erythronolactone C4H6O4---Succinic acid; LC-ESI-QTOF; MS2; CE C4H6O4	MS1	M-H	117.019	55.82	74.41	70.79	73.79		86.18	12.26	24.03	43.4	55.39	15.43	55.6	55.6	55.6		55.6	55.8	55.8	55.6	55.6	55.8	0.9	0.93	0.95		0.85	0.83	0.93	0.94	0.92	0.85	0.77	0.72	0.69		0.7	0.61	0.74	0.71	0.76	0.58
2	Erythronolactone C4H6O4---Succinic acid; LC-ESI-QTOF; MS2; CE C4H6O4	MS2	M-H	73.0296	55.82	27.79	12.82	11.24		34.06	10.59	13.94	12.31	11.5	12.77	55.6	55.6	55.6		55.6	55.8	55.8	55.6	55.6	55.8	0.9	0.93	0.95		0.85	0.83	0.93	0.94	0.92	0.85	0.77	0.8	0.69		0.72	0.74	0.74	0.77	0.79	0.58
2	Erythronolactone C4H6O4---Succinic acid; LC-ESI-QTOF; MS2; CE C4H6O4	MS2	M-H	99.9282	55.82	4.17	1.08	0.87		0	0	7.91	1.75	1.13	0	55.6	55.6	55.6		55.6	55.8	55.8	55.6	55.6	55.8	0.9	0.93	0.95		0.85	0.83	0.93	0.94	0.92	0.85	0.35	0.58	0.34		0	0	0.1	0.47	0.46	0
2	Erythronolactone C4H6O4---Succinic acid; LC-ESI-QTOF; MS2; CE C4H6O4	MS2	M-H	263.609	55.82	0	0	0		0	0	0	0	0	0	55.6	55.6	55.6		55.6	55.8	55.8	55.6	55.6	55.8	0.9	0.93	0.95		0.85	0.83	0.93	0.94	0.92	0.85	0	0	0		0	0	0	0	0	0
2	Erythronolactone C4H6O4---Succinic acid; LC-ESI-QTOF; MS2; CE C4H6O4	MS2	M-H	117.017	55.82	6.4	2.93	2.88		6.23	1	1.11	2.1	1.99	1.43	55.6	55.6	55.6		55.6	55.8	55.8	55.6	55.6	55.8	0.9	0.93	0.95		0.85	0.83	0.93	0.94	0.92	0.85	0.86	0.72	0.73		0.7	0.61	0.78	0.71	0.76	0.58
3	Taurine [2M-H]- C2H7NO3S NIST 1173837---Taurine [2M-H]- C2H7NO3S NIST 1173838---Taurine [M-H]- C2H7NO3S NIST 1173845	MS1	M-H	124.008	59	2518.71	2371.58	2790.86	2965.98	3898.77	1378	1442.1	4790.26	3585.36	1460.44	59	59	59	59	59	59	59	59	59	59	0.99	1	1	1	1	0.98	0.96	0.99	1	1	0.99	0.92	0.99	0.95	0.98	0.94	0.95	0.95	0.97	0.98
3	Taurine [2M-H]- C2H7NO3S NIST 1173837---Taurine [2M-H]- C2H7NO3S NIST 1173838---Taurine [M-H]- C2H7NO3S NIST 1173845	MS2	M-H	79.9574	59	1810.29	1088.98	2069.23	2593.53	2523.67	1146.56	977.57	3480.81	2704.98	1040.65	59	59	59	59	59	59	59	59	59	59	0.99	1	1	1	1	0.98	0.96	0.99	1	1	0.99	0.76	0.98	0.95	0.98	0.94	0.95	0.93	0.97	0.96
3	Taurine [2M-H]- C2H7NO3S NIST 1173837---Taurine [2M-H]- C2H7NO3S NIST 1173838---Taurine [M-H]- C2H7NO3S NIST 1173845	MS2	M-H	124.007	59	781.25	300.04	463.51	721.51	663.52	442.54	585.07	1516.64	863.23	335.63	59	59	59	59	59	59	59	59	59	59	0.99	1	1	1	1	0.98	0.96	0.99	1	1	0.83	0.71	0.99	0.91	0.97	0.81	0.74	0.86	0.93	0.93
3	Taurine [2M-H]- C2H7NO3S NIST 1173837---Taurine [2M-H]- C2H7NO3S NIST 1173838---Taurine [M-H]- C2H7NO3S NIST 1173845	MS2	M-H	106.98	59	18.32	9.79	15.57	20.49	17.19	11.69	10.5	39.58	25.27	11.06	59	59	59	59	59	59	59	59	59	59	0.99	1	1	1	1	0.98	0.96	0.99	1	1	0.87	0.92	0.99	0.91	0.98	0.88	0.8	0.97	0.93	0.91
3	Taurine [2M-H]- C2H7NO3S NIST 1173837---Taurine [2M-H]- C2H7NO3S NIST 1173838---Taurine [M-H]- C2H7NO3S NIST 1173845	MS2	M-H	80.966	59	13.9	11.1	17.16	19.49	18.48	8.98	8.38	27.05	23.15	6.64	59	59	59	59	59	59	59	59	59	59	0.99	1	1	1	1	0.98	0.96	0.99	1	1	0.86	0.66	0.98	0.95	0.97	0.93	0.96	0.93	0.98	0.9
3	Taurine [2M-H]- C2H7NO3S NIST 1173837---Taurine [2M-H]- C2H7NO3S NIST 1173838---Taurine [M-H]- C2H7NO3S NIST 1173845	MS2	M-H	79.7155	59	7.72	4.88	9.58	9.94	10.53	4.52	5.95	15.68	11.54	4.95	59	59	59	59	59	59	59	59	59	59	0.99	1	1	1	1	0.98	0.96	0.99	1	1	0.95	0.93	0.93	0.96	0.98	0.91	0.87	0.93	0.95	0.98
3	Taurine [2M-H]- C2H7NO3S NIST 1173837---Taurine [2M-H]- C2H7NO3S NIST 1173838---Taurine [M-H]- C2H7NO3S NIST 1173845	MS2	M-H	64.9713	59	5.75	2.68	4.91	12.24	9.8	4.31	4.35	14.21	10.29	4.98	59	59	59	59	59	59	59	59	59	59	0.99	1	1	1	1	0.98	0.96	0.99	1	1	1	0.67	0.96	0.95	0.98	0.95	0.93	0.95	0.97	0.98
4	DL-Malic acid [2M-H]- C4H6O5 NIST 1061976---Malic acid C4H6O5	MS1	M-H	133.014	56.25	220	145.08	143.07	226.91	185.43	210.86	164.25	309.97	387.45	211.99	55.6	55.6	55.6	55.6	55.6	55.6	55.6	55.6	55.6	55.6	0.93	0.95	0.93	0.9	0.91	0.94	0.87	0.9	0.88	0.9	0.81	0.78	0.91	0.9	0.87	0.75	0.87	0.96	0.93	0.93
4	DL-Malic acid [2M-H]- C4H6O5 NIST 1061976---Malic acid C4H6O5	MS2	M-H	115.005	56.25	197.97	66.79	70.45	48.38	61.24	96.84	39.59	69.5	74.83	43.73	55.6	55.6	55.6	55.6	55.6	55.6	55.6	55.6	55.6	55.6	0.93	0.95	0.93	0.9	0.91	0.94	0.87	0.9	0.88	0.9	0.76	0.71	0.91	0.9	0.84	0.73	0.79	0.95	0.71	0.91
4	DL-Malic acid [2M-H]- C4H6O5 NIST 1061976---Malic acid C4H6O5	MS2	M-H	132.866	56.25	10.03	10.09	11.27	6.82	11.96	11.96	4.47	2.88	4.59	5.71	55.6	55.6	55.6	55.6	55.6	55.6	55.6	55.6	55.6	55.6	0.93	0.95	0.93	0.9	0.91	0.94	0.87	0.9	0.88	0.9	0.81	0.78	0.71	0.69	0.74	0.43	0.73	0.84	0.64	0.63
4	DL-Malic acid [2M-H]- C4H6O5 NIST 1061976---Malic acid C4H6O5	MS2	M-H	71.0147	56.25	73.2	28.69	37.3	32.76	26.69	50.84	37.55	48.74	42.51	36.11	55.6	55.6	55.6	55.6	55.6	55.6	55.6	55.6	55.6	55.6	0.93	0.95	0.93	0.9	0.91	0.94	0.87	0.9	0.88	0.9	0.77	0.76	0.91	0.93	0.83	0.65	0.8	0.97	0.97	0.98
4	DL-Malic acid [2M-H]- C4H6O5 NIST 1061976---Malic acid C4H6O5	MS2	M-H	78.9604	56.25	23.79	29.29	36.91	47.76	44.58	11.29	15.4	36.26	40.54	23.75	55.6	55.6	55.6	55.6	55.6	55.6	55.6	55.6	55.6	55.6	0.93	0.95	0.93	0.9	0.91	0.94	0.87	0.9	0.88	0.9	0.95	0.92	0.83	0.89	0.87	0.79	0.87	0.96	0.93	0.93
4	DL-Malic acid [2M-H]- C4H6O5 NIST 1061976---Malic acid C4H6O5	MS2	M-H	96.9667	56.25	18.55	14.79	25.52	8.66	10.35	5.61	3.27	5.86	2.36	4.46	55.6	55.6	55.6	55.6	55.6	55.6	55.6	55.6	55.6	55.6	0.93	0.95	0.93	0.9	0.91	0.94	0.87	0.9	0.88	0.9	0.77	0.65	0.9	0.76	0.88	0.75	0.93	0.95	0.88	0.84
5	Adenine C5H5N5 MoNA 440100---Adenine; LC-ESI-QTOF; MS2; CE C5H5N5	MS1	M-H	134.047	155.57	61.57	164.07		12.65		39.67	44.57	11.35	35.31	18.5	156.6	155.5		155.6		156.6	156.6	155.6	155.6	155.6	0.97	0.97		0.99		0.92	0.92	0.92	0.94	0.96	0.64	0.93		0.83		0.77	0.78	0.75	0.76	0.58
5	Adenine C5H5N5 MoNA 440100---Adenine; LC-ESI-QTOF; MS2; CE C5H5N5	MS2	M-H	134.047	155.57	14.74	78.89		8.58		13.54	13.67	7.56	24.21	6.31	156.6	155.5		155.6		156.6	156.6	155.6	155.6	155.6	0.97	0.97		0.99		0.92	0.92	0.92	0.94	0.96	0.66	0.93		0.84		0.77	0.78	0.75	0.76	0.67
5	Adenine C5H5N5 MoNA 440100---Adenine; LC-ESI-QTOF; MS2; CE C5H5N5	MS2	M-H	107.036	155.57	6.12	20.55		4.23		5.28	7.76	3.02	5.17	2.71	156.6	155.5		155.6		156.6	156.6	155.6	155.6	155.6	0.97	0.97		0.99		0.92	0.92	0.92	0.94	0.96	0.64	0.97		0.83		0.91	0.83	0.77	0.82	0.58
5	Adenine C5H5N5 MoNA 440100---Adenine; LC-ESI-QTOF; MS2; CE C5H5N5	MS2	M-H	92.0249	155.57	5.59	2.8		1.62		0	0	0	0.29	0.54	156.6	155.5		155.6		156.6	156.6	155.6	155.6	155.6	0.97	0.97		0.99		0.92	0.92	0.92	0.94	0.96	0.57	0.49		0.39		0	0	0	0.47	0.49
5	Adenine C5H5N5 MoNA 440100---Adenine; LC-ESI-QTOF; MS2; CE C5H5N5	MS2	M-H	65.0142	155.57	0.41	2.27		0.17		0	0	0	0	0	156.6	155.5		155.6		156.6	156.6	155.6	155.6	155.6	0.97	0.97		0.99		0.92	0.92	0.92	0.94	0.96	0.64	0.86		0.5		0	0	0	0	0
5	Adenine C5H5N5 MoNA 440100---Adenine; LC-ESI-QTOF; MS2; CE C5H5N5	MS2	M-H	106.028	155.57	0	0		0		0	0	0	0	0	156.6	155.5		155.6		156.6	156.6	155.6	155.6	155.6	0.97	0.97		0.99		0.92	0.92	0.92	0.94	0.96	0	0		0		0	0	0	0	0
5	Adenine C5H5N5 MoNA 440100---Adenine; LC-ESI-QTOF; MS2; CE C5H5N5	MS2	M-H	133.642	155.57	0	0		0		0	0	0	0	0	156.6	155.5		155.6		156.6	156.6	155.6	155.6	155.6	0.97	0.97		0.99		0.92	0.92	0.92	0.94	0.96	0	0		0		0	0	0	0	0
6	Hypoxanthine C5H4N4O	MS1	M-H	135.03	95.9	44.27	42.32	40.17	44.68	44.72	37.03			49.92	37.29	95.9	95.9	95.9	95.9	95.9	95.9			96.7	96.7	0.97	0.98	0.84	1	0.9	0.95			0.98	1	0.68	0.78	0.64	0.79	0.62	0.6			0.78	0.85
6	Hypoxanthine C5H4N4O	MS2	M-H	92.0249	95.9	4.22	4.71	3.26	8.77	6.96	3.54			8.1	8.07	95.9	95.9	95.9	95.9	95.9	95.9			96.7	96.7	0.97	0.98	0.84	1	0.9	0.95			0.98	1	0.76	0.78	0.64	0.79	0.62	0.6			0.73	0.93
6	Hypoxanthine C5H4N4O	MS2	M-H	135.033	95.9	7.48	8.1	14.09	7.6	24.48	7.09			10.63	8.06	95.9	95.9	95.9	95.9	95.9	95.9			96.7	96.7	0.97	0.98	0.84	1	0.9	0.95			0.98	1	0.62	0.81	0.7	0.61	0.65	0.63			0.75	0.85
6	Hypoxanthine C5H4N4O	MS2	M-H	65.0145	95.9	1.4	2.14	0.25	3.01	0.75	0.5			2.11	2.26	95.9	95.9	95.9	95.9	95.9	95.9			96.7	96.7	0.97	0.98	0.84	1	0.9	0.95			0.98	1	0.68	0.75	0.31	0.8	0.61	0.41			0.87	0.77
6	Hypoxanthine C5H4N4O	MS2	M-H	66.0092	95.9	0.08	0.83	0	1.46	0.17	0.08			2.54	0.71	95.9	95.9	95.9	95.9	95.9	95.9			96.7	96.7	0.97	0.98	0.84	1	0.9	0.95			0.98	1	0.46	0.64	0	0.58	0.54	0.21			0.78	0.68
7	Glutamine C5H10N2O3---Glutamine; LC-ESI-ITFT; MS2; CE 75.0 eV; [M-H]- C5H10N2O3---Glutamine; LC-ESI-ITFT; MS2; CE 80.0 eV; [M-H]- C5H10N2O3---L-Glutamine [M-H]- C5H10N2O3 NIST 1187710---L-Glutamine [M-H]- C5H10N2O3 NIST 1187711	MS1	M-H	145.062	59.53	382.52	328.89	344.33	469.51	427.63	222.37	192.45	352.05	670.31	403.45	60.1	60.1	60.1	60.1	60.1	60.1	60.1	60.1	60.1	60.1	0.97	0.97	0.96	0.96	0.96	0.96	0.93	0.92	0.96	0.94	0.88	0.66	0.76	0.88	0.87	0.61	0.83	0.79	0.89	0.92
7	Glutamine C5H10N2O3---Glutamine; LC-ESI-ITFT; MS2; CE 75.0 eV; [M-H]- C5H10N2O3---Glutamine; LC-ESI-ITFT; MS2; CE 80.0 eV; [M-H]- C5H10N2O3---L-Glutamine [M-H]- C5H10N2O3 NIST 1187710---L-Glutamine [M-H]- C5H10N2O3 NIST 1187711	MS2	M-H	127.051	59.53	19.59	19.39	19.71	31.54	29.07	32.12	9.61	22.73	35.3	27.14	60.1	60.1	60.1	60.1	60.1	60.1	60.1	60.1	60.1	60.1	0.97	0.97	0.96	0.96	0.96	0.96	0.93	0.92	0.96	0.94	0.88	0.63	0.73	0.86	0.89	0.51	0.92	0.89	0.89	0.94
7	Glutamine C5H10N2O3---Glutamine; LC-ESI-ITFT; MS2; CE 75.0 eV; [M-H]- C5H10N2O3---Glutamine; LC-ESI-ITFT; MS2; CE 80.0 eV; [M-H]- C5H10N2O3---L-Glutamine [M-H]- C5H10N2O3 NIST 1187710---L-Glutamine [M-H]- C5H10N2O3 NIST 1187711	MS2	M-H	145.062	59.53	8.73	12.24	10.92	9.51	12.09	10.6	5.52	7.68	14.57	16.44	60.1	60.1	60.1	60.1	60.1	60.1	60.1	60.1	60.1	60.1	0.97	0.97	0.96	0.96	0.96	0.96	0.93	0.92	0.96	0.94	0.94	0.56	0.76	0.92	0.87	0.62	0.78	0.79	0.85	0.89
7	Glutamine C5H10N2O3---Glutamine; LC-ESI-ITFT; MS2; CE 75.0 eV; [M-H]- C5H10N2O3---Glutamine; LC-ESI-ITFT; MS2; CE 80.0 eV; [M-H]- C5H10N2O3---L-Glutamine [M-H]- C5H10N2O3 NIST 1187710---L-Glutamine [M-H]- C5H10N2O3 NIST 1187711	MS2	M-H	109.04	59.53	5.06	8.34	7.8	8.51	7.49	10.2	5.28	4.44	8.94	10	60.1	60.1	60.1	60.1	60.1	60.1	60.1	60.1	60.1	60.1	0.97	0.97	0.96	0.96	0.96	0.96	0.93	0.92	0.96	0.94	0.8	0.67	0.72	0.88	0.77	0.61	0.73	0.73	0.94	0.91
7	Glutamine C5H10N2O3---Glutamine; LC-ESI-ITFT; MS2; CE 75.0 eV; [M-H]- C5H10N2O3---Glutamine; LC-ESI-ITFT; MS2; CE 80.0 eV; [M-H]- C5H10N2O3---L-Glutamine [M-H]- C5H10N2O3 NIST 1187710---L-Glutamine [M-H]- C5H10N2O3 NIST 1187711	MS2	M-H	128.034	59.53	85.11	66.84	48.18	36.6	57.68	47.41	17.83	33.76	36	24.95	60.1	60.1	60.1	60.1	60.1	60.1	60.1	60.1	60.1	60.1	0.97	0.97	0.96	0.96	0.96	0.96	0.93	0.92	0.96	0.94	0.13	0.22	0.29	0.63	0.44	0.42	0.66	0.57	0.65	0.79
7	Glutamine C5H10N2O3---Glutamine; LC-ESI-ITFT; MS2; CE 75.0 eV; [M-H]- C5H10N2O3---Glutamine; LC-ESI-ITFT; MS2; CE 80.0 eV; [M-H]- C5H10N2O3---L-Glutamine [M-H]- C5H10N2O3 NIST 1187710---L-Glutamine [M-H]- C5H10N2O3 NIST 1187711	MS2	M-H	86.0245	59.53	0.57	0.71	0.81	0.38	0.57	0	0	0	0.57	0	60.1	60.1	60.1	60.1	60.1	60.1	60.1	60.1	60.1	60.1	0.97	0.97	0.96	0.96	0.96	0.96	0.93	0.92	0.96	0.94	0.62	0.27	0.7	0.65	0.63	0	0	0	0.82	0
7	Glutamine C5H10N2O3---Glutamine; LC-ESI-ITFT; MS2; CE 75.0 eV; [M-H]- C5H10N2O3---Glutamine; LC-ESI-ITFT; MS2; CE 80.0 eV; [M-H]- C5H10N2O3---L-Glutamine [M-H]- C5H10N2O3 NIST 1187710---L-Glutamine [M-H]- C5H10N2O3 NIST 1187711	MS2	M-H	84.0437	59.53	4.22	2.72	4.77	4.03	3.94	6.57	2.91	2.66	6.08	3.17	60.1	60.1	60.1	60.1	60.1	60.1	60.1	60.1	60.1	60.1	0.97	0.97	0.96	0.96	0.96	0.96	0.93	0.92	0.96	0.94	0.79	0.66	0.77	0.87	0.79	0.57	0.83	0.78	0.82	0.92
8	Unknown (carbon number 5); PlaSMA ID-102 C5H4N4O2---XANTHINE C5H4N4O2---Xanthine C5H4N4O2 MoNA 440035	MS1	M-H	151.026	96.11	27.18	97.76	28.98	16.5	62.28	28.91		13.03	71.93	49.38	97.8	97.8	96.1	96.1	97.8	97.8		96.1	97.8	97.8	0.97	0.93	0.95	0.95	0.95	0.97		0.99	0.96	0.96	0.84	0.78	0.69	0.74	0.84	0.72		0.65	0.7	0.87
8	Unknown (carbon number 5); PlaSMA ID-102 C5H4N4O2---XANTHINE C5H4N4O2---Xanthine C5H4N4O2 MoNA 440035	MS2	M-H	151.027	96.11	10	45.27	5.14	2.14	7.91	8.77		4.82	7.02	12.78	97.8	97.8	96.1	96.1	97.8	97.8		96.1	97.8	97.8	0.97	0.93	0.95	0.95	0.95	0.97		0.99	0.96	0.96	0.84	0.78	0.69	0.78	0.87	0.78		0.65	0.7	0.87
8	Unknown (carbon number 5); PlaSMA ID-102 C5H4N4O2---XANTHINE C5H4N4O2---Xanthine C5H4N4O2 MoNA 440035	MS2	M-H	108.02	96.11	5.18	18.68	3.78	1.23	7.31	5.72		3.13	8.06	7.88	97.8	97.8	96.1	96.1	97.8	97.8		96.1	97.8	97.8	0.97	0.93	0.95	0.95	0.95	0.97		0.99	0.96	0.96	0.89	0.87	0.8	0.74	0.84	0.72		0.84	0.87	0.87
8	Unknown (carbon number 5); PlaSMA ID-102 C5H4N4O2---XANTHINE C5H4N4O2---Xanthine C5H4N4O2 MoNA 440035	MS2	M-H	136.019	96.11	0.48	0	0	0	0	0.78		1.8	0	0	97.8	97.8	96.1	96.1	97.8	97.8		96.1	97.8	97.8	0.97	0.93	0.95	0.95	0.95	0.97		0.99	0.96	0.96	0.55	0	0	0	0	0.23		0.21	0	0
9	P-Anisic acid C8H8O3	MS1	M-H	151.04	523.8	11.83	12.69	8.1	11.44	10.4		11.55	12.59	10.02	7.02	523.8	523.8	523.8	523.8	523.8		523.8	523.8	523.8	523.8	0.77	0.84	0.92	0.93	0.85		0.79	0.93	0.82	0.89	0.71	0.68	0.77	0.59	0.62		0.62	0.86	0.83	0.7
9	P-Anisic acid C8H8O3	MS2	M-H	92.027	523.8	4.46	2.31	4.2	3.24	3.34		3.83	4.36	3.19	4.71	523.8	523.8	523.8	523.8	523.8		523.8	523.8	523.8	523.8	0.77	0.84	0.92	0.93	0.85		0.79	0.93	0.82	0.89	0.73	0.86	0.84	0.69	0.81		0.57	0.93	0.83	0.7
9	P-Anisic acid C8H8O3	MS2	M-H	136.018	523.8	4.89	2.28	2.39	4.01	2.63		3.05	2.45	4.23	2.04	523.8	523.8	523.8	523.8	523.8		523.8	523.8	523.8	523.8	0.77	0.84	0.92	0.93	0.85		0.79	0.93	0.82	0.89	0.64	0.49	0.77	0.59	0.6		0.62	0.34	0.5	0.52
9	P-Anisic acid C8H8O3	MS2	M-H	151.04	523.8	4.78	2.52	0.57	1.45	2.21		3.5	1.76	2.46	0	523.8	523.8	523.8	523.8	523.8		523.8	523.8	523.8	523.8	0.77	0.84	0.92	0.93	0.85		0.79	0.93	0.82	0.89	0.71	0.68	0.75	0.44	0.62		0.68	0.86	0.88	0
9	P-Anisic acid C8H8O3	MS2	M-H	219.099	523.8	0	0	0	0	0		0	0	0	0	523.8	523.8	523.8	523.8	523.8		523.8	523.8	523.8	523.8	0.77	0.84	0.92	0.93	0.85		0.79	0.93	0.82	0.89	0	0	0	0	0		0	0	0	0
9	P-Anisic acid C8H8O3	MS2	M-H	132.927	523.8	2.37	0	0	1.54	0		0	3.6	3.14	2.13	523.8	523.8	523.8	523.8	523.8		523.8	523.8	523.8	523.8	0.77	0.84	0.92	0.93	0.85		0.79	0.93	0.82	0.89	0.16	0	0	0.05	0		0	0.11	0.35	0.73
9	P-Anisic acid C8H8O3	MS2	M-H	222.135	523.8	0	0	0	0	0		0	0	0	0	523.8	523.8	523.8	523.8	523.8		523.8	523.8	523.8	523.8	0.77	0.84	0.92	0.93	0.85		0.79	0.93	0.82	0.89	0	0	0	0	0		0	0	0	0
10	D-Fructose [M-H]- C6H12O6 NIST 1076648---Psicose C6H12O6---Tagatose C6H12O6	MS1	M-H2O-H	161.045	62.44	173.12		214.3		224.92	53.87			89.44	107.21	62.3		62.3		62.3	62.3			61.2	62.3	0.98		0.98		0.97	0.99			0.98	0.96	0.57		0.52		0.75	0.66			0.65	0.82
10	D-Fructose [M-H]- C6H12O6 NIST 1076648---Psicose C6H12O6---Tagatose C6H12O6	MS2	M-H2O-H	71.0146	62.44	15.39		19.4		19.53	12.45			9.85	12.32	62.3		62.3		62.3	62.3			61.2	62.3	0.98		0.98		0.97	0.99			0.98	0.96	0.7		0.65		0.79	0.66			0.75	0.82
10	D-Fructose [M-H]- C6H12O6 NIST 1076648---Psicose C6H12O6---Tagatose C6H12O6	MS2	M-H2O-H	59.0191	62.44	26.86		30.7		26.36	9.92			6.41	7.59	62.3		62.3		62.3	62.3			61.2	62.3	0.98		0.98		0.97	0.99			0.98	0.96	0.27		0.37		0.45	0.66			0.54	0.85
10	D-Fructose [M-H]- C6H12O6 NIST 1076648---Psicose C6H12O6---Tagatose C6H12O6	MS2	M-H2O-H	85.0295	62.44	8.36		9.15		13.14	5.33			3.44	6.68	62.3		62.3		62.3	62.3			61.2	62.3	0.98		0.98		0.97	0.99			0.98	0.96	0.57		0.52		0.75	0.58			0.65	0.79
11	DL-Phenylalanine [M-H-NH3]- C9H11NO2 NIST 1189950---DL-Phenylalanine [M-H-NH3]- C9H11NO2 NIST 1189951---L-(-)-Phenylalanine C9H11NO2---L-(-)-Phenylalanine; LC-ESI-QTOF; MS2; CE C9H11NO2---L-Phenylalanine C9H11NO2 MassBank 3219---L-Phenylalanine C9H11NO2 MoNA 439021---Phenylalanine C9H11NO2	MS1	M-H	164.071	192.8		19.59	54.78	32.35	58.37	13.32	13.95	24.33				192.8	193.3	194.4	193.3	192.8	192.8	192.8				0.8	0.8	0.81	0.78	0.73	0.78	0.78				0.76	0.83	0.68	0.58	0.51	0.67	0.7
11	DL-Phenylalanine [M-H-NH3]- C9H11NO2 NIST 1189950---DL-Phenylalanine [M-H-NH3]- C9H11NO2 NIST 1189951---L-(-)-Phenylalanine C9H11NO2---L-(-)-Phenylalanine; LC-ESI-QTOF; MS2; CE C9H11NO2---L-Phenylalanine C9H11NO2 MassBank 3219---L-Phenylalanine C9H11NO2 MoNA 439021---Phenylalanine C9H11NO2	MS2	M-H	147.045	192.8		4.28	23.57	6.36	12.16	5.35	4.28	7.4				192.8	193.3	194.4	193.3	192.8	192.8	192.8				0.8	0.8	0.81	0.78	0.73	0.78	0.78				0.79	0.91	0.68	0.6	0.59	0.82	0.7
11	DL-Phenylalanine [M-H-NH3]- C9H11NO2 NIST 1189950---DL-Phenylalanine [M-H-NH3]- C9H11NO2 NIST 1189951---L-(-)-Phenylalanine C9H11NO2---L-(-)-Phenylalanine; LC-ESI-QTOF; MS2; CE C9H11NO2---L-Phenylalanine C9H11NO2 MassBank 3219---L-Phenylalanine C9H11NO2 MoNA 439021---Phenylalanine C9H11NO2	MS2	M-H	103.055	192.8		2.91	6.46	5	4	2.02	3.1	1.25				192.8	193.3	194.4	193.3	192.8	192.8	192.8				0.8	0.8	0.81	0.78	0.73	0.78	0.78				0.73	0.83	0.59	0.58	0.51	0.67	0.75
11	DL-Phenylalanine [M-H-NH3]- C9H11NO2 NIST 1189950---DL-Phenylalanine [M-H-NH3]- C9H11NO2 NIST 1189951---L-(-)-Phenylalanine C9H11NO2---L-(-)-Phenylalanine; LC-ESI-QTOF; MS2; CE C9H11NO2---L-Phenylalanine C9H11NO2 MassBank 3219---L-Phenylalanine C9H11NO2 MoNA 439021---Phenylalanine C9H11NO2	MS2	M-H	496.825	192.8		0	0	0	0	0	0	0				192.8	193.3	194.4	193.3	192.8	192.8	192.8				0.8	0.8	0.81	0.78	0.73	0.78	0.78				0	0	0	0	0	0	0
11	DL-Phenylalanine [M-H-NH3]- C9H11NO2 NIST 1189950---DL-Phenylalanine [M-H-NH3]- C9H11NO2 NIST 1189951---L-(-)-Phenylalanine C9H11NO2---L-(-)-Phenylalanine; LC-ESI-QTOF; MS2; CE C9H11NO2---L-Phenylalanine C9H11NO2 MassBank 3219---L-Phenylalanine C9H11NO2 MoNA 439021---Phenylalanine C9H11NO2	MS2	M-H	218.305	192.8		0	0	0	0	0	0	0				192.8	193.3	194.4	193.3	192.8	192.8	192.8				0.8	0.8	0.81	0.78	0.73	0.78	0.78				0	0	0	0	0	0	0
11	DL-Phenylalanine [M-H-NH3]- C9H11NO2 NIST 1189950---DL-Phenylalanine [M-H-NH3]- C9H11NO2 NIST 1189951---L-(-)-Phenylalanine C9H11NO2---L-(-)-Phenylalanine; LC-ESI-QTOF; MS2; CE C9H11NO2---L-Phenylalanine C9H11NO2 MassBank 3219---L-Phenylalanine C9H11NO2 MoNA 439021---Phenylalanine C9H11NO2	MS2	M-H	164.071	192.8		2.81	13.94	5.04	9.15	2.16	3.67	5.03				192.8	193.3	194.4	193.3	192.8	192.8	192.8				0.8	0.8	0.81	0.78	0.73	0.78	0.78				0.76	0.83	0.78	0.51	0.51	0.63	0.62
11	DL-Phenylalanine [M-H-NH3]- C9H11NO2 NIST 1189950---DL-Phenylalanine [M-H-NH3]- C9H11NO2 NIST 1189951---L-(-)-Phenylalanine C9H11NO2---L-(-)-Phenylalanine; LC-ESI-QTOF; MS2; CE C9H11NO2---L-Phenylalanine C9H11NO2 MassBank 3219---L-Phenylalanine C9H11NO2 MoNA 439021---Phenylalanine C9H11NO2	MS2	M-H	220.714	192.8		0	0	0	0	0	0	0				192.8	193.3	194.4	193.3	192.8	192.8	192.8				0.8	0.8	0.81	0.78	0.73	0.78	0.78				0	0	0	0	0	0	0
12	URATE C5H4N4O3	MS1	M-H	167.021	65.13	359.23	225.71	175.37	315.56	397.72		31.33		63.3	42.07	64.5	64.5	64.5	64.5	64.5		64.5		64.5	64.5	0.98	0.95	0.96	0.99	0.98		0.99		0.95	0.95	0.93	0.77	0.86	0.79	0.78		0.68		0.72	0.64
12	URATE C5H4N4O3	MS2	M-H	124.015	65.13	37.87	30.99	18.42	56.75	79.22		6.5		13.02	9.89	64.5	64.5	64.5	64.5	64.5		64.5		64.5	64.5	0.98	0.95	0.96	0.99	0.98		0.99		0.95	0.95	0.93	0.77	0.86	0.79	0.78		0.7		0.83	0.64
12	URATE C5H4N4O3	MS2	M-H	167.021	65.13	32.14	50.09	16.2	65.98	145.53		5.92		8.54	12.43	64.5	64.5	64.5	64.5	64.5		64.5		64.5	64.5	0.98	0.95	0.96	0.99	0.98		0.99		0.95	0.95	0.92	0.61	0.87	0.79	0.68		0.68		0.66	0.48
12	URATE C5H4N4O3	MS2	M-H	96.023	65.13	7.36	4.66	4.25	2.74	5.92		0		1.81	0.2	64.5	64.5	64.5	64.5	64.5		64.5		64.5	64.5	0.98	0.95	0.96	0.99	0.98		0.99		0.95	0.95	0.93	0.93	0.82	0.71	0.92		0		0.72	0.73
13	Glycerol-2-phosphate; LC-ESI-QTOF; MS2; CE C3H9O6P	MS1	M-H	171.006	56.59	20.25	18.8	13.73	17.83	31.41	413.06	366.55	334.65	1425.35	836.53	56.6	56.6	56.6	56.6	55.6	56.7	56.7	56.7	55.6	56.7	0.96	0.84	0.96	0.93	0.97	1	0.99	0.99	0.99	0.97	0.88	0.88	0.68	0.61	0.79	0.9	0.89	0.91	0.88	0.91
13	Glycerol-2-phosphate; LC-ESI-QTOF; MS2; CE C3H9O6P	MS2	M-H	78.9589	56.59	31.74	20.31	52.28	56.62	58.35	392.1	400.63	329.32	1677.83	924.07	56.6	56.6	56.6	56.6	55.6	56.7	56.7	56.7	55.6	56.7	0.96	0.84	0.96	0.93	0.97	1	0.99	0.99	0.99	0.97	0.88	0.88	0.92	0.86	0.93	0.9	0.95	0.98	0.8	0.91
13	Glycerol-2-phosphate; LC-ESI-QTOF; MS2; CE C3H9O6P	MS2	M-H	96.9682	56.59	5.68	9.15	11.57	13.69	16.57	11.32	19.59	23.58	73.51	42.17	56.6	56.6	56.6	56.6	55.6	56.7	56.7	56.7	55.6	56.7	0.96	0.84	0.96	0.93	0.97	1	0.99	0.99	0.99	0.97	0.91	0.95	0.64	0.61	0.49	0.92	0.89	0.91	0.94	0.82
13	Glycerol-2-phosphate; LC-ESI-QTOF; MS2; CE C3H9O6P	MS2	M-H	171.007	56.59	0	0.4	1.07	0	0.4	18.27	18.69	18.48	71.71	79.5	56.6	56.6	56.6	56.6	55.6	56.7	56.7	56.7	55.6	56.7	0.96	0.84	0.96	0.93	0.97	1	0.99	0.99	0.99	0.97	0	0.5	0.68	0	0.79	0.49	0.88	0.79	0.88	0.84
13	Glycerol-2-phosphate; LC-ESI-QTOF; MS2; CE C3H9O6P	MS2	M-H	62.9647	56.59	0	0	0	0	0.41	1.42	1.14	0.53	4.3	2.63	56.6	56.6	56.6	56.6	55.6	56.7	56.7	56.7	55.6	56.7	0.96	0.84	0.96	0.93	0.97	1	0.99	0.99	0.99	0.97	0	0	0	0	0.42	0.8	0.89	0.91	0.74	0.91
13	Glycerol-2-phosphate; LC-ESI-QTOF; MS2; CE C3H9O6P	MS2	M-H	80.6461	56.59	0	0	0	0	0	0	0	0	0	0	56.6	56.6	56.6	56.6	55.6	56.7	56.7	56.7	55.6	56.7	0.96	0.84	0.96	0.93	0.97	1	0.99	0.99	0.99	0.97	0	0	0	0	0	0	0	0	0	0
14	Ascorbic acid C6H8O6	MS1	M-H	175.024	56.94		7.6	6.77	6.07	8.49				231.67	56.43		56.9	56.9	56.9	56.9				57.8	57.8		0.57	0.62	0.62	0.62				0.98	0.86		0.57	0.67	0.53	0.71				0.94	0.96
14	Ascorbic acid C6H8O6	MS2	M-H	87.0084	56.94		4.63	5.48	7.14	8.27				59.31	15.95		56.9	56.9	56.9	56.9				57.8	57.8		0.57	0.62	0.62	0.62				0.98	0.86		0.76	0.78	0.74	0.72				0.93	1
14	Ascorbic acid C6H8O6	MS2	M-H	115.003	56.94		0	0.22	0	1.09				31.86	9.05		56.9	56.9	56.9	56.9				57.8	57.8		0.57	0.62	0.62	0.62				0.98	0.86		0	0.67	0	0.43				0.94	0.96
14	Ascorbic acid C6H8O6	MS2	M-H	59.0136	56.94		219.25	362.03	299.89	469.47				59.95	70.24		56.9	56.9	56.9	56.9				57.8	57.8		0.57	0.62	0.62	0.62				0.98	0.86		0.55	0.59	0.53	0.71				0.57	0.49
14	Ascorbic acid C6H8O6	MS2	M-H	71.014	56.94		62.31	114.28	78.26	158.08				17.19	20.53		56.9	56.9	56.9	56.9				57.8	57.8		0.57	0.62	0.62	0.62				0.98	0.86		0.57	0.58	0.52	0.65				0.84	0.56
14	Ascorbic acid C6H8O6	MS2	M-H	86.9761	56.94		82.69	105	92.01	115.61				2.4	7.85		56.9	56.9	56.9	56.9				57.8	57.8		0.57	0.62	0.62	0.62				0.98	0.86		0.26	0.18	0.32	0.34				0.47	0.59
14	Ascorbic acid C6H8O6	MS2	M-H	175.024	56.94		0	0	0	0				11.07	1.9		56.9	56.9	56.9	56.9				57.8	57.8		0.57	0.62	0.62	0.62				0.98	0.86		0	0	0	0				0.95	0.45
15	.beta.-D-Allose [2M-H]- C6H12O6 NIST 1076740---D-Fructose [M-H]- C6H12O6 NIST 1076647---D-Fructose [M-H]- C6H12O6 NIST 1076648---Mannose C6H12O6	MS1	M-H	179.056	61.13	799.23	800.39	857.26	704.62	1064.7	193.29	290.97	169.31	501.49	385.35	61.2	61.2	61.2	61.2	61.2	61.2	61.2	60.1	60.1	61.2	1	0.98	0.97	1	0.98	1	1	0.93	0.99	0.99	0.97	0.96	0.97	0.99	0.97	0.86	0.91	0.93	0.92	0.83
15	.beta.-D-Allose [2M-H]- C6H12O6 NIST 1076740---D-Fructose [M-H]- C6H12O6 NIST 1076647---D-Fructose [M-H]- C6H12O6 NIST 1076648---Mannose C6H12O6	MS2	M-H	59.0137	61.13	350.7	216.12	358.15	296.94	462.29	61.91	98.25	42.94	147.42	139.02	61.2	61.2	61.2	61.2	61.2	61.2	61.2	60.1	60.1	61.2	1	0.98	0.97	1	0.98	1	1	0.93	0.99	0.99	0.98	0.97	0.98	0.99	0.97	0.94	0.92	0.96	0.92	0.93
15	.beta.-D-Allose [2M-H]- C6H12O6 NIST 1076740---D-Fructose [M-H]- C6H12O6 NIST 1076647---D-Fructose [M-H]- C6H12O6 NIST 1076648---Mannose C6H12O6	MS2	M-H	71.0137	61.13	106.64	61.32	113.11	77.57	154.05	20.64	28.29	11.99	36.71	40.47	61.2	61.2	61.2	61.2	61.2	61.2	61.2	60.1	60.1	61.2	1	0.98	0.97	1	0.98	1	1	0.93	0.99	0.99	0.97	0.96	0.97	0.99	0.93	0.86	0.91	0.93	0.82	0.83
15	.beta.-D-Allose [2M-H]- C6H12O6 NIST 1076740---D-Fructose [M-H]- C6H12O6 NIST 1076647---D-Fructose [M-H]- C6H12O6 NIST 1076648---Mannose C6H12O6	MS2	M-H	89.0242	61.13	37.15	31.54	62.36	37.5	114.28	8.43	11.68	17.58	12.64	12.97	61.2	61.2	61.2	61.2	61.2	61.2	61.2	60.1	60.1	61.2	1	0.98	0.97	1	0.98	1	1	0.93	0.99	0.99	0.95	0.89	0.87	0.88	0.75	0.74	0.69	0.92	0.93	0.71
15	.beta.-D-Allose [2M-H]- C6H12O6 NIST 1076740---D-Fructose [M-H]- C6H12O6 NIST 1076647---D-Fructose [M-H]- C6H12O6 NIST 1076648---Mannose C6H12O6	MS2	M-H	58.0064	61.13	9.82	8.3	12.08	10.07	16.15	1.63	4.88	1.56	4.87	4.22	61.2	61.2	61.2	61.2	61.2	61.2	61.2	60.1	60.1	61.2	1	0.98	0.97	1	0.98	1	1	0.93	0.99	0.99	0.97	0.91	0.96	0.98	0.96	0.84	0.89	0.86	0.9	0.8
15	.beta.-D-Allose [2M-H]- C6H12O6 NIST 1076740---D-Fructose [M-H]- C6H12O6 NIST 1076647---D-Fructose [M-H]- C6H12O6 NIST 1076648---Mannose C6H12O6	MS2	M-H	55.0194	61.13	6.5	3.63	5.42	3.9	10.04	1.56	1.73	0.08	3.22	4.31	61.2	61.2	61.2	61.2	61.2	61.2	61.2	60.1	60.1	61.2	1	0.98	0.97	1	0.98	1	1	0.93	0.99	0.99	0.93	0.81	0.95	0.88	0.94	0.69	0.85	0.55	0.82	0.79
15	.beta.-D-Allose [2M-H]- C6H12O6 NIST 1076740---D-Fructose [M-H]- C6H12O6 NIST 1076647---D-Fructose [M-H]- C6H12O6 NIST 1076648---Mannose C6H12O6	MS2	M-H	119.034	61.13	7.11	9.17	13.71	6.29	15.99	1.01	3.84	1.01	1.9	4.84	61.2	61.2	61.2	61.2	61.2	61.2	61.2	60.1	60.1	61.2	1	0.98	0.97	1	0.98	1	1	0.93	0.99	0.99	0.86	0.89	0.92	0.83	0.98	0.59	0.69	0.59	0.68	0.75
15	Glyceraldehyde C3H6O3	MS1	2M-H	179.056	60.71	799.23	800.39	857.26	704.62	1064.7	193.29	290.97	169.31	501.49	385.35	61.2	61.2	61.2	61.2	61.2	61.2	61.2	60.1	60.1	61.2	0.98	0.99	0.97	0.99	0.98	0.98	0.99	0.95	0.98	0.99	0.97	0.96	0.97	0.99	0.96	0.86	0.91	0.93	0.92	0.83
15	Glyceraldehyde C3H6O3	MS2	2M-H	59.0139	60.71	350.7	216.12	358.15	296.94	462.29	61.91	98.25	42.94	147.42	139.02	61.2	61.2	61.2	61.2	61.2	61.2	61.2	60.1	60.1	61.2	0.98	0.99	0.97	0.99	0.98	0.98	0.99	0.95	0.98	0.99	0.98	0.97	0.98	0.99	0.97	0.94	0.92	0.96	0.92	0.93
15	Glyceraldehyde C3H6O3	MS2	2M-H	71.0138	60.71	106.64	61.32	113.11	77.57	154.05	20.64	28.29	11.99	36.71	40.47	61.2	61.2	61.2	61.2	61.2	61.2	61.2	60.1	60.1	61.2	0.98	0.99	0.97	0.99	0.98	0.98	0.99	0.95	0.98	0.99	0.97	0.96	0.97	0.99	0.93	0.86	0.91	0.93	0.82	0.83
15	Glyceraldehyde C3H6O3	MS2	2M-H	58.0062	60.71	9.82	8.3	12.08	10.07	16.15	1.63	4.88	1.56	4.87	4.22	61.2	61.2	61.2	61.2	61.2	61.2	61.2	60.1	60.1	61.2	0.98	0.99	0.97	0.99	0.98	0.98	0.99	0.95	0.98	0.99	0.97	0.91	0.96	0.98	0.96	0.84	0.89	0.86	0.9	0.8
15	Glyceraldehyde C3H6O3	MS2	2M-H	89.0254	60.71	37.15	31.54	62.36	37.5	114.28	8.43	11.68	17.58	12.64	12.97	61.2	61.2	61.2	61.2	61.2	61.2	61.2	60.1	60.1	61.2	0.98	0.99	0.97	0.99	0.98	0.98	0.99	0.95	0.98	0.99	0.95	0.89	0.87	0.88	0.75	0.74	0.69	0.92	0.93	0.71
15	Glyceraldehyde C3H6O3	MS2	2M-H	85.0291	60.71	11.48	8.63	12.86	10.49	17.64	4.06	3.69	3.11	7.38	7.02	61.2	61.2	61.2	61.2	61.2	61.2	61.2	60.1	60.1	61.2	0.98	0.99	0.97	0.99	0.98	0.98	0.99	0.95	0.98	0.99	0.88	0.92	0.95	0.91	0.9	0.54	0.73	0.26	0.65	0.68
15	Glyceraldehyde C3H6O3	MS2	2M-H	90.9684	60.71	0	0.78	0	1.52	0.88	0	0	0.88	0	0.59	61.2	61.2	61.2	61.2	61.2	61.2	61.2	60.1	60.1	61.2	0.98	0.99	0.97	0.99	0.98	0.98	0.99	0.95	0.98	0.99	0	0.33	0	0.35	0.41	0	0	0.65	0	0.28
15	ISF of Glyceraldehyde C3H6O3	MS1	-	89.0244	59.3					447.72				305.98						60.1				59						0.98				1						0.61				0.6
15	ISF of Glyceraldehyde C3H6O3	MS2	-	89.0277	59.3					10.55				8.15						60.1				59						0.98				1						0.83				0.87
15	ISF of Glyceraldehyde C3H6O3	MS2	-	59.0133	59.3					3.61				1.97						60.1				59						0.98				1						0.61				0.6
16	3-Hydroxyphenylalanine C9H11NO3---L-Tyrosine C9H11NO3 MassBank 3190---L-Tyrosine C9H11NO3 MoNA 439023---L-Tyrosine [M-H-NH3]- C9H11NO3 NIST 1187834---L-Tyrosine [M-H-NH3]- C9H11NO3 NIST 1187835---M-Tyrosine C9H11NO3---Tyr C9H11NO3	MS1	M-H	180.066	90.75	34.23	23.42	39.96	30.99	51.28		21.28	46.82	60.57	28.78	92.3	90.8	91.2	91.1	91.1		91.1	91.2	91.1	91.1	0.93	0.99	0.93	0.99	1		0.99	0.96	0.96	0.93	0.75	0.55	0.59	0.62	0.55		0.64	0.57	0.64	0.61
16	3-Hydroxyphenylalanine C9H11NO3---L-Tyrosine C9H11NO3 MassBank 3190---L-Tyrosine C9H11NO3 MoNA 439023---L-Tyrosine [M-H-NH3]- C9H11NO3 NIST 1187834---L-Tyrosine [M-H-NH3]- C9H11NO3 NIST 1187835---M-Tyrosine C9H11NO3---Tyr C9H11NO3	MS2	M-H	119.051	90.75	5.2	3.28	2.57	5.2	5.08		4.56	2.8	7.01	3.45	92.3	90.8	91.2	91.1	91.1		91.1	91.2	91.1	91.1	0.93	0.99	0.93	0.99	1		0.99	0.96	0.96	0.93	0.76	0.55	0.59	0.69	0.8		0.64	0.69	0.64	0.88
16	3-Hydroxyphenylalanine C9H11NO3---L-Tyrosine C9H11NO3 MassBank 3190---L-Tyrosine C9H11NO3 MoNA 439023---L-Tyrosine [M-H-NH3]- C9H11NO3 NIST 1187834---L-Tyrosine [M-H-NH3]- C9H11NO3 NIST 1187835---M-Tyrosine C9H11NO3---Tyr C9H11NO3	MS2	M-H	163.042	90.75	10.27	1.11	4.44	3.21	3.65		3.59	3.06	12.54	5.4	92.3	90.8	91.2	91.1	91.1		91.1	91.2	91.1	91.1	0.93	0.99	0.93	0.99	1		0.99	0.96	0.96	0.93	0.75	0.59	0.76	0.62	0.55		0.65	0.57	0.71	0.61
17	ISF of N-ACETYL-DL-GLUTAMIC ACID C7H11NO5---N-Acetyl-L-glutamic acid [M-H]- C7H11NO5 NIST 1180261---N-Acetyl-L-glutamic acid [M-H]- C7H11NO5 NIST 1180268---N-Acetyl-L-glutamic acid [M-H]- C7H11NO5 NIST 1180269---N-Acetyl-L-glutamic acid [M-H]- C7H11NO5 NIST 1180270	MS1	-	146.046	56.92	228.08	211.89	217.85	227.18	344.91	156.58	103.77	275.4	386.72	133.23	56.7	56.7	56.7	56.7	56.7	56.7	56.7	56.7	56.7	56.7	0.94	0.93	0.97	0.98	0.96	0.97	0.99	0.95	0.99	0.93	0.6	0.8	0.93	0.91	0.87	0.85	0.79	0.96	0.88	0.93
17	ISF of N-ACETYL-DL-GLUTAMIC ACID C7H11NO5---N-Acetyl-L-glutamic acid [M-H]- C7H11NO5 NIST 1180261---N-Acetyl-L-glutamic acid [M-H]- C7H11NO5 NIST 1180268---N-Acetyl-L-glutamic acid [M-H]- C7H11NO5 NIST 1180269---N-Acetyl-L-glutamic acid [M-H]- C7H11NO5 NIST 1180270	MS2	-	102.055	56.92	98.58	66.48	78.9	35.26	71.39	64.99	20.92	36.73	42.41	21.1	56.7	56.7	56.7	56.7	56.7	56.7	56.7	56.7	56.7	56.7	0.94	0.93	0.97	0.98	0.96	0.97	0.99	0.95	0.99	0.93	0.6	0.8	0.93	0.85	0.75	0.85	0.79	0.98	0.9	0.95
17	ISF of N-ACETYL-DL-GLUTAMIC ACID C7H11NO5---N-Acetyl-L-glutamic acid [M-H]- C7H11NO5 NIST 1180261---N-Acetyl-L-glutamic acid [M-H]- C7H11NO5 NIST 1180268---N-Acetyl-L-glutamic acid [M-H]- C7H11NO5 NIST 1180269---N-Acetyl-L-glutamic acid [M-H]- C7H11NO5 NIST 1180270	MS2	-	128.036	56.92	83.17	65.86	46.41	32.73	61.95	42.55	14.04	33.75	25.9	21.73	56.7	56.7	56.7	56.7	56.7	56.7	56.7	56.7	56.7	56.7	0.94	0.93	0.97	0.98	0.96	0.97	0.99	0.95	0.99	0.93	0.6	0.78	0.93	0.93	0.87	0.85	0.87	0.94	0.87	0.8
17	ISF of N-ACETYL-DL-GLUTAMIC ACID C7H11NO5---N-Acetyl-L-glutamic acid [M-H]- C7H11NO5 NIST 1180261---N-Acetyl-L-glutamic acid [M-H]- C7H11NO5 NIST 1180268---N-Acetyl-L-glutamic acid [M-H]- C7H11NO5 NIST 1180269---N-Acetyl-L-glutamic acid [M-H]- C7H11NO5 NIST 1180270	MS2	-	146.045	56.92	34.69	21.93	18.98	9.76	21.67	13.55	3.58	14.62	7.44	7.21	56.7	56.7	56.7	56.7	56.7	56.7	56.7	56.7	56.7	56.7	0.94	0.93	0.97	0.98	0.96	0.97	0.99	0.95	0.99	0.93	0.54	0.81	0.86	0.91	0.92	0.95	0.61	0.96	0.88	0.93
17	N-ACETYL-DL-GLUTAMIC ACID C7H11NO5---N-Acetyl-L-glutamic acid [M-H]- C7H11NO5 NIST 1180261---N-Acetyl-L-glutamic acid [M-H]- C7H11NO5 NIST 1180268---N-Acetyl-L-glutamic acid [M-H]- C7H11NO5 NIST 1180269---N-Acetyl-L-glutamic acid [M-H]- C7H11NO5 NIST 1180270	MS1	M-H	188.056	56.65	69.53	96.88	116.63	112.99	99.69	66.14	91.86	21.1	153.33	91.74	56.7	56.7	56.7	56.7	56.7	56.7	56.7	56.6	56.7	56.7	0.83	0.84	0.88	0.83	0.82	0.98	0.98	0.91	0.95	0.88	0.99	1	0.98	0.99	0.97	0.96	0.96	0.95	0.95	0.95
17	N-ACETYL-DL-GLUTAMIC ACID C7H11NO5---N-Acetyl-L-glutamic acid [M-H]- C7H11NO5 NIST 1180261---N-Acetyl-L-glutamic acid [M-H]- C7H11NO5 NIST 1180268---N-Acetyl-L-glutamic acid [M-H]- C7H11NO5 NIST 1180269---N-Acetyl-L-glutamic acid [M-H]- C7H11NO5 NIST 1180270	MS2	M-H	102.056	56.65	9.85	13.35	18	16.18	16.97	6.82	18.24	3.96	33.31	21.28	56.7	56.7	56.7	56.7	56.7	56.7	56.7	56.6	56.7	56.7	0.83	0.84	0.88	0.83	0.82	0.98	0.98	0.91	0.95	0.88	1	1	0.98	0.99	0.97	0.96	0.96	0.98	0.95	0.95
17	N-ACETYL-DL-GLUTAMIC ACID C7H11NO5---N-Acetyl-L-glutamic acid [M-H]- C7H11NO5 NIST 1180261---N-Acetyl-L-glutamic acid [M-H]- C7H11NO5 NIST 1180268---N-Acetyl-L-glutamic acid [M-H]- C7H11NO5 NIST 1180269---N-Acetyl-L-glutamic acid [M-H]- C7H11NO5 NIST 1180270	MS2	M-H	128.035	56.65	10.69	14.6	31.15	19.12	18.95	6.4	19.69	5.99	37.32	27.03	56.7	56.7	56.7	56.7	56.7	56.7	56.7	56.6	56.7	56.7	0.83	0.84	0.88	0.83	0.82	0.98	0.98	0.91	0.95	0.88	0.99	1	0.98	0.99	0.98	0.97	0.96	0.94	0.97	0.85
17	N-ACETYL-DL-GLUTAMIC ACID C7H11NO5---N-Acetyl-L-glutamic acid [M-H]- C7H11NO5 NIST 1180261---N-Acetyl-L-glutamic acid [M-H]- C7H11NO5 NIST 1180268---N-Acetyl-L-glutamic acid [M-H]- C7H11NO5 NIST 1180269---N-Acetyl-L-glutamic acid [M-H]- C7H11NO5 NIST 1180270	MS2	M-H	100.078	56.65	2.56	2.25	2.25	1.18	1.64	0.82	2.86	0.87	3.46	3.05	56.7	56.7	56.7	56.7	56.7	56.7	56.7	56.6	56.7	56.7	0.83	0.84	0.88	0.83	0.82	0.98	0.98	0.91	0.95	0.88	0.96	0.98	0.96	0.95	0.81	0.86	0.93	0.88	0.87	0.95
17	N-ACETYL-DL-GLUTAMIC ACID C7H11NO5---N-Acetyl-L-glutamic acid [M-H]- C7H11NO5 NIST 1180261---N-Acetyl-L-glutamic acid [M-H]- C7H11NO5 NIST 1180268---N-Acetyl-L-glutamic acid [M-H]- C7H11NO5 NIST 1180269---N-Acetyl-L-glutamic acid [M-H]- C7H11NO5 NIST 1180270	MS2	M-H	59.0137	56.65	59.64	45.09	61.91	53.09	98.47	13.3	18.79	44.91	41.06	43.59	56.7	56.7	56.7	56.7	56.7	56.7	56.7	56.6	56.7	56.7	0.83	0.84	0.88	0.83	0.82	0.98	0.98	0.91	0.95	0.88	0.23	0.28	0.22	0.21	0.15	0.17	0.43	0.12	0.78	0.43
17	N-ACETYL-DL-GLUTAMIC ACID C7H11NO5---N-Acetyl-L-glutamic acid [M-H]- C7H11NO5 NIST 1180261---N-Acetyl-L-glutamic acid [M-H]- C7H11NO5 NIST 1180268---N-Acetyl-L-glutamic acid [M-H]- C7H11NO5 NIST 1180269---N-Acetyl-L-glutamic acid [M-H]- C7H11NO5 NIST 1180270	MS2	M-H	58.0305	56.65	2.84	2.22	2.06	2.91	2.09	1.94	2.56	3.94	4.61	3.18	56.7	56.7	56.7	56.7	56.7	56.7	56.7	56.6	56.7	56.7	0.83	0.84	0.88	0.83	0.82	0.98	0.98	0.91	0.95	0.88	0.99	0.96	0.94	0.97	0.96	0.75	0.89	0.95	0.87	0.99
17	N-ACETYL-DL-GLUTAMIC ACID C7H11NO5---N-Acetyl-L-glutamic acid [M-H]- C7H11NO5 NIST 1180261---N-Acetyl-L-glutamic acid [M-H]- C7H11NO5 NIST 1180268---N-Acetyl-L-glutamic acid [M-H]- C7H11NO5 NIST 1180269---N-Acetyl-L-glutamic acid [M-H]- C7H11NO5 NIST 1180270	MS2	M-H	144.068	56.65	2.46	3.43	6.59	2.95	2.26	1.48	1.95	0	6.52	4.01	56.7	56.7	56.7	56.7	56.7	56.7	56.7	56.6	56.7	56.7	0.83	0.84	0.88	0.83	0.82	0.98	0.98	0.91	0.95	0.88	0.77	0.97	0.97	0.93	0.94	0.65	0.68	0	0.89	0.7
18	CITRATE C6H8O7---Citric acid (Not validated, isomer of 228); PlaSMA ID-227 C6H8O7	MS1	M-H	191.02	56.6	809.08	723.12	692.95	772.42	880.82	740.3	772.04	846.5	2993.09	618.42	56.7	56.7	56.7	56.7	56.7	56.7	56.7	56.7	64.5	56.7	0.97	0.99	0.98	0.99	1	0.99	1	0.99	0.99	0.99	0.99	0.98	0.96	0.96	0.95	0.95	0.95	0.98	0.86	0.96
18	CITRATE C6H8O7---Citric acid (Not validated, isomer of 228); PlaSMA ID-227 C6H8O7	MS2	M-H	111.009	56.6	464.75	428.84	422.29	512.34	694.76	300.19	403.11	474.16	1137.84	310.97	56.7	56.7	56.7	56.7	56.7	56.7	56.7	56.7	64.5	56.7	0.97	0.99	0.98	0.99	1	0.99	1	0.99	0.99	0.99	0.75	0.98	0.96	0.95	0.89	0.96	0.87	0.97	0.86	0.88
18	CITRATE C6H8O7---Citric acid (Not validated, isomer of 228); PlaSMA ID-227 C6H8O7	MS2	M-H	87.009	56.6	105.01	132.81	131.38	199.29	181.22	96.6	163.89	135.6	328.22	129.26	56.7	56.7	56.7	56.7	56.7	56.7	56.7	56.7	64.5	56.7	0.97	0.99	0.98	0.99	1	0.99	1	0.99	0.99	0.99	0.99	0.98	0.96	0.96	0.9	0.95	0.88	0.99	0.84	0.81
18	CITRATE C6H8O7---Citric acid (Not validated, isomer of 228); PlaSMA ID-227 C6H8O7	MS2	M-H	85.0308	56.6	44.46	67.66	49.1	92.62	87.12	42.42	76.89	54.53	149.07	62.72	56.7	56.7	56.7	56.7	56.7	56.7	56.7	56.7	64.5	56.7	0.97	0.99	0.98	0.99	1	0.99	1	0.99	0.99	0.99	0.97	0.98	0.97	0.94	0.88	0.93	0.82	0.97	0.83	0.75
18	CITRATE C6H8O7---Citric acid (Not validated, isomer of 228); PlaSMA ID-227 C6H8O7	MS2	M-H	57.0355	56.6	29.56	37.16	38.51	54.07	34.41	26.22	27.22	34.57	81.34	25.21	56.7	56.7	56.7	56.7	56.7	56.7	56.7	56.7	64.5	56.7	0.97	0.99	0.98	0.99	1	0.99	1	0.99	0.99	0.99	0.99	0.96	0.92	0.96	0.91	0.94	0.95	0.98	0.87	0.99
18	CITRATE C6H8O7---Citric acid (Not validated, isomer of 228); PlaSMA ID-227 C6H8O7	MS2	M-H	67.0205	56.6	23.9	40.02	43.3	51.88	29.64	27.89	31.13	38.51	84.55	23.78	56.7	56.7	56.7	56.7	56.7	56.7	56.7	56.7	64.5	56.7	0.97	0.99	0.98	0.99	1	0.99	1	0.99	0.99	0.99	1	0.97	0.95	0.96	0.96	0.94	0.98	0.98	0.85	0.96
18	CITRATE C6H8O7---Citric acid (Not validated, isomer of 228); PlaSMA ID-227 C6H8O7	MS2	M-H	129.027	56.6	34.09	23.21	33.81	45.66	55.89	14.74	17.05	25.82	53.6	10.79	56.7	56.7	56.7	56.7	56.7	56.7	56.7	56.7	64.5	56.7	0.97	0.99	0.98	0.99	1	0.99	1	0.99	0.99	0.99	0.64	0.96	0.91	0.83	0.95	0.95	0.92	0.97	0.75	0.94
19	D-GLUCURONIC ACID C6H10O7	MS1	M-H	193.035	57.37	91.94	66.34	35.89	36.2	46.11	29.73	30.9		25.98	23.46	56.7	56.7	56.7	56.7	56.7	57.4	57.4		57.4	57.4	0.95	0.85	0.87	0.88	0.86	0.76	0.76		0.85	0.78	0.99	0.99	0.94	0.96	0.94	0.82	0.82		0.94	0.91
19	D-GLUCURONIC ACID C6H10O7	MS2	M-H	59.0149	57.37	27.13	23.64	39.7	52.27	37.05	17.75	20.23		37	20.26	56.7	56.7	56.7	56.7	56.7	57.4	57.4		57.4	57.4	0.95	0.85	0.87	0.88	0.86	0.76	0.76		0.85	0.78	0.99	0.99	0.91	0.96	0.94	0.88	0.97		0.97	0.92
19	D-GLUCURONIC ACID C6H10O7	MS2	M-H	85.03	57.37	44.46	67.66	49.1	80.89	66.87	107.34	157.09		98.12	114.26	56.7	56.7	56.7	56.7	56.7	57.4	57.4		57.4	57.4	0.95	0.85	0.87	0.88	0.86	0.76	0.76		0.85	0.78	0.93	0.99	0.96	0.95	0.91	0.75	0.65		0.82	0.64
19	D-GLUCURONIC ACID C6H10O7	MS2	M-H	72.9939	57.37	6.61	4.7	5.54	8.4	7.69	3.29	3.5		4.87	2.67	56.7	56.7	56.7	56.7	56.7	57.4	57.4		57.4	57.4	0.95	0.85	0.87	0.88	0.86	0.76	0.76		0.85	0.78	0.97	0.94	0.9	0.93	0.99	0.61	0.82		0.85	0.64
19	D-GLUCURONIC ACID C6H10O7	MS2	M-H	113.025	57.37	7.81	3.46	2.11	4.07	4.35	1.14	3.97		3.8	3.1	56.7	56.7	56.7	56.7	56.7	57.4	57.4		57.4	57.4	0.95	0.85	0.87	0.88	0.86	0.76	0.76		0.85	0.78	0.56	0.76	0.94	0.85	0.84	0.51	0.8		0.7	0.3
19	D-GLUCURONIC ACID C6H10O7	MS2	M-H	71.0141	57.37	10.02	7.99	8.8	15.73	11.22	4.96	4.95		6.38	5.54	56.7	56.7	56.7	56.7	56.7	57.4	57.4		57.4	57.4	0.95	0.85	0.87	0.88	0.86	0.76	0.76		0.85	0.78	0.99	1	0.93	0.96	0.94	0.82	0.71		0.94	0.91
19	D-GLUCURONIC ACID C6H10O7	MS2	M-H	95.0127	57.37	0.4	0.2	0	0	0	0	0		0	0	56.7	56.7	56.7	56.7	56.7	57.4	57.4		57.4	57.4	0.95	0.85	0.87	0.88	0.86	0.76	0.76		0.85	0.78	0.34	0.82	0	0	0	0	0		0	0
20	Galactonic acid [M-H]- C6H12O7 NIST 1113917---Galactonic acid [M-H]- C6H12O7 NIST 1113920---Gluconate C6H12O7---Gluconic acid C6H12O7	MS1	M-H	195.051	56.86	394.34	228.04	348.69	439.95	649.75	138.88	134.24	56.4	334.4	222.68	56.7	56.7	56.7	56.7	56.7	56.7	56.7	56.7	56.7	56.7	0.95	0.98	0.94	0.97	0.99	0.96	0.94	0.84	0.98	0.98	1	0.98	0.96	0.97	0.96	0.99	0.96	0.99	0.95	0.88
20	Galactonic acid [M-H]- C6H12O7 NIST 1113917---Galactonic acid [M-H]- C6H12O7 NIST 1113920---Gluconate C6H12O7---Gluconic acid C6H12O7	MS2	M-H	75.0087	56.86	35.33	36.93	49.73	91.31	94.71	12.19	12.43	8.25	44.4	19.34	56.7	56.7	56.7	56.7	56.7	56.7	56.7	56.7	56.7	56.7	0.95	0.98	0.94	0.97	0.99	0.96	0.94	0.84	0.98	0.98	1	0.97	0.92	0.97	0.95	0.96	0.96	0.79	0.95	0.88
20	Galactonic acid [M-H]- C6H12O7 NIST 1113917---Galactonic acid [M-H]- C6H12O7 NIST 1113920---Gluconate C6H12O7---Gluconic acid C6H12O7	MS2	M-H	195.051	56.86	67.38	33.21	93.96	79.16	89.27	12.02	13.21	9.31	37.59	18.78	56.7	56.7	56.7	56.7	56.7	56.7	56.7	56.7	56.7	56.7	0.95	0.98	0.94	0.97	0.99	0.96	0.94	0.84	0.98	0.98	0.67	0.94	0.95	0.73	0.96	0.97	0.92	0.99	0.92	0.86
20	Galactonic acid [M-H]- C6H12O7 NIST 1113917---Galactonic acid [M-H]- C6H12O7 NIST 1113920---Gluconate C6H12O7---Gluconic acid C6H12O7	MS2	M-H	59.014	56.86	27.13	23.64	39.7	52.27	37.05	7.99	12.64	8.72	28.68	13.54	56.7	56.7	56.7	56.7	56.7	56.7	56.7	56.7	56.7	56.7	0.95	0.98	0.94	0.97	0.99	0.96	0.94	0.84	0.98	0.98	1	0.98	0.85	0.97	0.96	0.99	0.98	0.95	0.95	0.92
20	Galactonic acid [M-H]- C6H12O7 NIST 1113917---Galactonic acid [M-H]- C6H12O7 NIST 1113920---Gluconate C6H12O7---Gluconic acid C6H12O7	MS2	M-H	99.0086	56.86	4.08	3.73	2.64	5.81	4.51	1.12	2.33	0.41	1.98	2.69	56.7	56.7	56.7	56.7	56.7	56.7	56.7	56.7	56.7	56.7	0.95	0.98	0.94	0.97	0.99	0.96	0.94	0.84	0.98	0.98	0.61	0.99	0.96	0.95	0.92	0.86	0.86	0.91	0.87	0.74
20	Galactonic acid [M-H]- C6H12O7 NIST 1113917---Galactonic acid [M-H]- C6H12O7 NIST 1113920---Gluconate C6H12O7---Gluconic acid C6H12O7	MS2	M-H	177.042	56.86	13.91	5.56	16.11	14.21	19.7	3.33	2.45	2.1	7.57	4.43	56.7	56.7	56.7	56.7	56.7	56.7	56.7	56.7	56.7	56.7	0.95	0.98	0.94	0.97	0.99	0.96	0.94	0.84	0.98	0.98	0.6	0.98	0.95	0.82	0.98	0.99	0.77	0.98	0.86	0.82
20	Galactonic acid [M-H]- C6H12O7 NIST 1113917---Galactonic acid [M-H]- C6H12O7 NIST 1113920---Gluconate C6H12O7---Gluconic acid C6H12O7	MS2	M-H	129.018	56.86	34.09	23.21	33.81	41.25	37.7	14.74	17.05	25.9	15.16	10.79	56.7	56.7	56.7	56.7	56.7	56.7	56.7	56.7	56.7	56.7	0.95	0.98	0.94	0.97	0.99	0.96	0.94	0.84	0.98	0.98	0.47	0.96	0.96	0.68	0.9	0.95	0.79	0.99	0.89	0.82
21	D-Erythrose-4-phosphate; LC-ESI-QTOF; MS2; CE C4H9O7P	MS1	M-H	199.001	56.05	5.13	4.52	5.93	5.01	9	19.02	8.46	65.85	27.58	79.01	56	56	56	56	56	56	56	55.6	55.6	55.6	0.97	0.97	0.98	0.96	0.97	0.96	0.96	0.97	0.95	0.93	0.89	0.59	0.67	0.95	0.9	0.79	0.6	0.98	0.94	0.86
21	D-Erythrose-4-phosphate; LC-ESI-QTOF; MS2; CE C4H9O7P	MS2	M-H	78.9588	56.05	13.29	22.23	64.99	57.29	41.13	21.71	10.96	57.88	52.22	55.47	56	56	56	56	56	56	56	55.6	55.6	55.6	0.97	0.97	0.98	0.96	0.97	0.96	0.96	0.97	0.95	0.93	0.9	0.59	0.68	0.96	0.9	0.92	0.94	1	0.95	1
21	D-Erythrose-4-phosphate; LC-ESI-QTOF; MS2; CE C4H9O7P	MS2	M-H	96.9701	56.05	5.69	6.23	19.45	32.72	24.38	9.65	4.06	22.44	10.1	38.27	56	56	56	56	56	56	56	55.6	55.6	55.6	0.97	0.97	0.98	0.96	0.97	0.96	0.96	0.97	0.95	0.93	0.89	0.67	0.67	0.95	0.92	0.79	0.6	0.98	0.94	0.86
21	D-Erythrose-4-phosphate; LC-ESI-QTOF; MS2; CE C4H9O7P	MS2	M-H	136.924	56.05	0	0	1.32	0	0	0	0	0	0	0	56	56	56	56	56	56	56	55.6	55.6	55.6	0.97	0.97	0.98	0.96	0.97	0.96	0.96	0.97	0.95	0.93	0	0	0.43	0	0	0	0	0	0	0
22	O,O-Diethyl phosphate [M-H]- C4H11O4P NIST 1192363	MS1	M+HCOO	199.036	69.24		59.79										68.9										0.9										0.85
22	O,O-Diethyl phosphate [M-H]- C4H11O4P NIST 1192363	MS2	M+HCOO	78.9592	69.24		10.71										68.9										0.9										0.96
22	O,O-Diethyl phosphate [M-H]- C4H11O4P NIST 1192363	MS2	M+HCOO	125	69.24		14.91										68.9										0.9										0.85
22	O,O-Diethyl phosphate [M-H]- C4H11O4P NIST 1192363	MS2	M+HCOO	199.028	69.24		3.54										68.9										0.9										0.37
22	O,O-Diethyl phosphate [M-H]- C4H11O4P NIST 1192363	MS2	M+HCOO	152.999	69.24		1.65										68.9										0.9										0.69
22	O,O-Diethyl phosphate [M-H]- C4H11O4P NIST 1192363	MS2	M+HCOO	96.9589	69.24		0.66										68.9										0.9										0.6
23	L-Tryptophan C11H12N2O2 MoNA 437028---L-Tryptophan C11H12N2O2 MoNA 437029---L-Tryptophan [2M-H]- C11H12N2O2 NIST 1188388---L-Tryptophan [M-H]- C11H12N2O2 NIST 1188418---L-Tryptophan [M-H]- C11H12N2O2 NIST 1188419---Tryptophan; LC-ESI-ITFT; MS2; HCD; CE 90.0 eV; [M-H]- C11H12N2O2---Tryptophan; LC-ESI-ITFT; MS2; HCD; CE 95.0 eV; [M-H]- C11H12N2O2	MS1	M-H	203.082	282.46	20.59		27.86	22.49	37.97		11.23		39.21		282.5		283.2	282.5	283.2		282.5		283.2		0.88		0.92	0.91	0.89		0.88		0.92		0.71		0.75	0.79	0.7		0.6		0.83
23	L-Tryptophan C11H12N2O2 MoNA 437028---L-Tryptophan C11H12N2O2 MoNA 437029---L-Tryptophan [2M-H]- C11H12N2O2 NIST 1188388---L-Tryptophan [M-H]- C11H12N2O2 NIST 1188418---L-Tryptophan [M-H]- C11H12N2O2 NIST 1188419---Tryptophan; LC-ESI-ITFT; MS2; HCD; CE 90.0 eV; [M-H]- C11H12N2O2---Tryptophan; LC-ESI-ITFT; MS2; HCD; CE 95.0 eV; [M-H]- C11H12N2O2	MS2	M-H	116.05	282.46	4.34		6.48	6.21	7.19		1.87		12.13		282.5		283.2	282.5	283.2		282.5		283.2		0.88		0.92	0.91	0.89		0.88		0.92		0.71		0.85	0.92	0.85		0.72		0.9
23	L-Tryptophan C11H12N2O2 MoNA 437028---L-Tryptophan C11H12N2O2 MoNA 437029---L-Tryptophan [2M-H]- C11H12N2O2 NIST 1188388---L-Tryptophan [M-H]- C11H12N2O2 NIST 1188418---L-Tryptophan [M-H]- C11H12N2O2 NIST 1188419---Tryptophan; LC-ESI-ITFT; MS2; HCD; CE 90.0 eV; [M-H]- C11H12N2O2---Tryptophan; LC-ESI-ITFT; MS2; HCD; CE 95.0 eV; [M-H]- C11H12N2O2	MS2	M-H	142.067	282.46	1.47		1.71	1.1	1.22		0.61		2.02		282.5		283.2	282.5	283.2		282.5		283.2		0.88		0.92	0.91	0.89		0.88		0.92		0.72		0.75	0.65	0.59		0.6		0.72
23	L-Tryptophan C11H12N2O2 MoNA 437028---L-Tryptophan C11H12N2O2 MoNA 437029---L-Tryptophan [2M-H]- C11H12N2O2 NIST 1188388---L-Tryptophan [M-H]- C11H12N2O2 NIST 1188418---L-Tryptophan [M-H]- C11H12N2O2 NIST 1188419---Tryptophan; LC-ESI-ITFT; MS2; HCD; CE 90.0 eV; [M-H]- C11H12N2O2---Tryptophan; LC-ESI-ITFT; MS2; HCD; CE 95.0 eV; [M-H]- C11H12N2O2	MS2	M-H	74.0239	282.46	1.58		1.06	0.66	0.62		0		2.25		282.5		283.2	282.5	283.2		282.5		283.2		0.88		0.92	0.91	0.89		0.88		0.92		0.59		0.65	0.79	0.65		0		0.83
23	L-Tryptophan C11H12N2O2 MoNA 437028---L-Tryptophan C11H12N2O2 MoNA 437029---L-Tryptophan [2M-H]- C11H12N2O2 NIST 1188388---L-Tryptophan [M-H]- C11H12N2O2 NIST 1188418---L-Tryptophan [M-H]- C11H12N2O2 NIST 1188419---Tryptophan; LC-ESI-ITFT; MS2; HCD; CE 90.0 eV; [M-H]- C11H12N2O2---Tryptophan; LC-ESI-ITFT; MS2; HCD; CE 95.0 eV; [M-H]- C11H12N2O2	MS2	M-H	203.081	282.46	2.34		4.58	0	3.79		0		4.44		282.5		283.2	282.5	283.2		282.5		283.2		0.88		0.92	0.91	0.89		0.88		0.92		0.42		0.57	0	0.7		0		0.65
23	L-Tryptophan C11H12N2O2 MoNA 437028---L-Tryptophan C11H12N2O2 MoNA 437029---L-Tryptophan [2M-H]- C11H12N2O2 NIST 1188388---L-Tryptophan [M-H]- C11H12N2O2 NIST 1188418---L-Tryptophan [M-H]- C11H12N2O2 NIST 1188419---Tryptophan; LC-ESI-ITFT; MS2; HCD; CE 90.0 eV; [M-H]- C11H12N2O2---Tryptophan; LC-ESI-ITFT; MS2; HCD; CE 95.0 eV; [M-H]- C11H12N2O2	MS2	M-H	219.652	282.46	0		0	0	0		0		0		282.5		283.2	282.5	283.2		282.5		283.2		0.88		0.92	0.91	0.89		0.88		0.92		0		0	0	0		0		0
23	L-Tryptophan C11H12N2O2 MoNA 437028---L-Tryptophan C11H12N2O2 MoNA 437029---L-Tryptophan [2M-H]- C11H12N2O2 NIST 1188388---L-Tryptophan [M-H]- C11H12N2O2 NIST 1188418---L-Tryptophan [M-H]- C11H12N2O2 NIST 1188419---Tryptophan; LC-ESI-ITFT; MS2; HCD; CE 90.0 eV; [M-H]- C11H12N2O2---Tryptophan; LC-ESI-ITFT; MS2; HCD; CE 95.0 eV; [M-H]- C11H12N2O2	MS2	M-H	159.091	282.46	1.04		1.68	0.65	0		0		0		282.5		283.2	282.5	283.2		282.5		283.2		0.88		0.92	0.91	0.89		0.88		0.92		0.49		0.49	0.62	0		0		0
24	2-Naphthalenesulfonic acid; LC-ESI-ITFT; MS2; CE C10H8O3S	MS1	M-H	207.012	447.46	113.68	120.17	83.75	274.85	69.07	112.57	92.98	117.7	113.52	159.51	447.4	447.4	447.4	447.4	447.4	447.4	447.4	447.4	447.4	447.4	0.98	0.98	0.91	0.99	0.98	0.98	0.97	0.95	0.99	0.96	0.74	0.92	0.87	0.87	0.9	0.93	0.85	0.7	0.89	0.79
24	2-Naphthalenesulfonic acid; LC-ESI-ITFT; MS2; CE C10H8O3S	MS2	M-H	207.012	447.46	28.03	35.76	67.29	88.82	31.81	29.95	50.51	92.15	54.96	72.2	447.4	447.4	447.4	447.4	447.4	447.4	447.4	447.4	447.4	447.4	0.98	0.98	0.91	0.99	0.98	0.98	0.97	0.95	0.99	0.96	0.74	0.93	0.79	0.89	0.86	0.93	0.76	0.95	0.87	0.61
24	2-Naphthalenesulfonic acid; LC-ESI-ITFT; MS2; CE C10H8O3S	MS2	M-H	143.05	447.46	31.22	31.89	26.03	83.58	33.87	23.57	37.87	46.55	43.84	45.84	447.4	447.4	447.4	447.4	447.4	447.4	447.4	447.4	447.4	447.4	0.98	0.98	0.91	0.99	0.98	0.98	0.97	0.95	0.99	0.96	0.85	0.92	0.9	0.87	0.95	0.97	0.85	0.7	0.89	0.79
24	2-Naphthalenesulfonic acid; LC-ESI-ITFT; MS2; CE C10H8O3S	MS2	M-H	79.9572	447.46	7.2	7.88	3.97	18	5.04	7.84	6.21	8.33	6.6	7.57	447.4	447.4	447.4	447.4	447.4	447.4	447.4	447.4	447.4	447.4	0.98	0.98	0.91	0.99	0.98	0.98	0.97	0.95	0.99	0.96	0.6	0.88	0.87	0.77	0.9	0.93	0.93	0.65	0.83	0.74
24	2-Naphthalenesulfonic acid; LC-ESI-ITFT; MS2; CE C10H8O3S	MS2	M-H	115.056	447.46	2.14	2.14	1.87	3.45	1.38	1.86	2.14	0	2.69	4.5	447.4	447.4	447.4	447.4	447.4	447.4	447.4	447.4	447.4	447.4	0.98	0.98	0.91	0.99	0.98	0.98	0.97	0.95	0.99	0.96	0.64	0.76	0.7	0.86	0.76	0.7	0.8	0	0.93	0.82
24	2-Naphthalenesulfonic acid; LC-ESI-ITFT; MS2; CE C10H8O3S	MS2	M-H	182.92	447.46	0	0	0	0	0	0	0	0	0	0	447.4	447.4	447.4	447.4	447.4	447.4	447.4	447.4	447.4	447.4	0.98	0.98	0.91	0.99	0.98	0.98	0.97	0.95	0.99	0.96	0	0	0	0	0	0	0	0	0	0
25	trans-4,5-Epoxy-2(E)-decenal [M+H]+ C10H16O2 NIST 1205103	MS1	M+HCOO	213.113	460.12	4.97	7.65	53.88	14.04	65.83		2.21	2.86	47.63	11.22	460.1	460.1	459.6	460.1	460.7		460.1	460.1	459.6	460.1	0.95	0.94	0.95	0.89	0.93		0.82	0.93	0.93	0.89	0.62	0.6	0.79	0.67	0.87		0.7	0.64	0.83	0.8
25	trans-4,5-Epoxy-2(E)-decenal [M+H]+ C10H16O2 NIST 1205103	MS2	M+HCOO	123.081	460.12	1.37	2.5	9.83	2.39	13.5		0.46	1.48	8.88	2.33	460.1	460.1	459.6	460.1	460.7		460.1	460.1	459.6	460.1	0.95	0.94	0.95	0.89	0.93		0.82	0.93	0.93	0.89	0.7	0.71	0.93	0.67	0.93		0.91	0.32	0.83	0.62
25	trans-4,5-Epoxy-2(E)-decenal [M+H]+ C10H16O2 NIST 1205103	MS2	M+HCOO	139.113	460.12	1.45	2.84	11.18	2.23	12.43		0.36	0.85	9.5	0.87	460.1	460.1	459.6	460.1	460.7		460.1	460.1	459.6	460.1	0.95	0.94	0.95	0.89	0.93		0.82	0.93	0.93	0.89	0.31	0.54	0.73	0.86	0.87		0.7	0.83	0.73	0.82
25	trans-4,5-Epoxy-2(E)-decenal [M+H]+ C10H16O2 NIST 1205103	MS2	M+HCOO	213.113	460.12	1.8	3.65	17.47	3.94	20.34		0.66	1.27	11.24	2.99	460.1	460.1	459.6	460.1	460.7		460.1	460.1	459.6	460.1	0.95	0.94	0.95	0.89	0.93		0.82	0.93	0.93	0.89	0.62	0.6	0.79	0.48	0.75		0.7	0.64	0.91	0.8
25	trans-4,5-Epoxy-2(E)-decenal [M+H]+ C10H16O2 NIST 1205103	MS2	M+HCOO	137.097	460.12	0.9	1.77	0.84	0	2.76		0	0	1.44	0	460.1	460.1	459.6	460.1	460.7		460.1	460.1	459.6	460.1	0.95	0.94	0.95	0.89	0.93		0.82	0.93	0.93	0.89	0.29	0.45	0.6	0	0.81		0	0	0.73	0
25	trans-4,5-Epoxy-2(E)-decenal [M+H]+ C10H16O2 NIST 1205103	MS2	M+HCOO	151.113	460.12	0	0.25	2.39	0.38	2.2		0	0	0	0	460.1	460.1	459.6	460.1	460.7		460.1	460.1	459.6	460.1	0.95	0.94	0.95	0.89	0.93		0.82	0.93	0.93	0.89	0	0.58	0.64	0.31	0.78		0	0	0	0
25	trans-4,5-Epoxy-2(E)-decenal [M+H]+ C10H16O2 NIST 1205103	MS2	M+HCOO	213.082	460.12	0	0	0	0	0		0.45	0	0	0	460.1	460.1	459.6	460.1	460.7		460.1	460.1	459.6	460.1	0.95	0.94	0.95	0.89	0.93		0.82	0.93	0.93	0.89	0	0	0	0	0		0.7	0	0	0
26	2-Benzothiazolesulfonic acid C7H5NO3S2	MS1	M-H	213.963	386.98	6.39	42.46	27.51	11.41	18.9						387	387.5	387.5	387	387						0.91	0.95	0.96	0.93	0.99						0.63	0.87	0.76	0.66	0.9
26	2-Benzothiazolesulfonic acid C7H5NO3S2	MS2	M-H	134.007	386.98	5.09	29.41	26.14	11.61	16.68						387	387.5	387.5	387	387						0.91	0.95	0.96	0.93	0.99						0.93	0.98	0.74	0.84	0.9
26	2-Benzothiazolesulfonic acid C7H5NO3S2	MS2	M-H	213.963	386.98	0.6	12.37	13.76	5.89	11.72						387	387.5	387.5	387	387						0.91	0.95	0.96	0.93	0.99						0.63	0.83	0.76	0.54	0.95
26	2-Benzothiazolesulfonic acid C7H5NO3S2	MS2	M-H	150.002	386.98	0	4.33	2.63	0.75	2.57						387	387.5	387.5	387	387						0.91	0.95	0.96	0.93	0.99						0	0.87	0.63	0.33	0.79
26	2-Benzothiazolesulfonic acid C7H5NO3S2	MS2	M-H	57.9755	386.98	0	2.77	2.61	1.44	1.76						387	387.5	387.5	387	387						0.91	0.95	0.96	0.93	0.99						0	0.83	0.8	0.66	0.71
27	5-Methoxypsoralen C12H8O4	MS1	M-H	215.032	58.24	352.57	260.42	275.52	262.46	324.4	73.01	135.49	54.79	163.18	132.65	59	59	57.9	59	59	59	59	59	57.8	59	0.81	0.76	0.83	0.8	0.79	0.81	0.79	0.92	0.82	0.78	0.9	0.81	0.8	0.79	0.69	0.86	0.73	0.78	0.84	0.75
27	5-Methoxypsoralen C12H8O4	MS2	M-H	89.0253	58.24	53.68	56.54	56.49	100.08	101.5	22.05	35.25	20.59	33.02	112.86	59	59	57.9	59	59	59	59	59	57.8	59	0.81	0.76	0.83	0.8	0.79	0.81	0.79	0.92	0.82	0.78	0.69	0.84	0.69	0.56	0.44	0.86	0.61	0.78	0.76	0.31
27	5-Methoxypsoralen C12H8O4	MS2	M-H	215.034	58.24	7.35	3.22	6.55	3.59	2.91	1.2	3.51	2.92	3.16	0.68	59	59	57.9	59	59	59	59	59	57.8	59	0.81	0.76	0.83	0.8	0.79	0.81	0.79	0.92	0.82	0.78	0.9	0.66	0.8	0.8	0.71	0.54	0.65	0.91	0.9	0.75
27	5-Methoxypsoralen C12H8O4	MS2	M-H	59.0146	58.24	229.03	232.02	167.12	380.69	284.11	70.32	140.5	28.73	99.7	219.46	59	59	57.9	59	59	59	59	59	57.8	59	0.81	0.76	0.83	0.8	0.79	0.81	0.79	0.92	0.82	0.78	0.65	0.78	0.66	0.47	0.51	0.76	0.73	0.5	0.74	0.44
27	5-Methoxypsoralen C12H8O4	MS2	M-H	94.9261	58.24	1.44	2.09	2.28	1.99	1.05	0.55	0.8	0.8	1.74	0.5	59	59	57.9	59	59	59	59	59	57.8	59	0.81	0.76	0.83	0.8	0.79	0.81	0.79	0.92	0.82	0.78	0.93	0.81	0.8	0.79	0.69	0.98	0.83	0.68	0.84	0.93
27	ISF of 5-Methoxypsoralen C12H8O4	MS1	-	89.0245	59.52					447.72				305.98						60.1				59						0.98				1						0.61				0.6
27	ISF of 5-Methoxypsoralen C12H8O4	MS2	-	89.0236	59.52					10.55				8.15						60.1				59						0.98				1						0.83				0.87
27	ISF of 5-Methoxypsoralen C12H8O4	MS2	-	59.0142	59.52					3.61				1.97						60.1				59						0.98				1						0.61				0.6
28	D-(+)-Pantothenic acid; LC-ESI-QTOF; MS2; CE C9H17NO5---D-PANTOTHENIC ACID C9H17NO5---Pantothenate C9H17NO5---Pantothenic acid C9H17NO5	MS1	M-H	218.103	114.7		17.82	27.73	23.42	37.71			31.55	26.95	7.35		114.7	115.6	114.7	115.6			115.6	115.6	114.7		0.86	0.85	0.87	0.85			0.86	0.86	0.68		0.87	0.76	0.64	0.67			0.8	0.69	0.71
28	D-(+)-Pantothenic acid; LC-ESI-QTOF; MS2; CE C9H17NO5---D-PANTOTHENIC ACID C9H17NO5---Pantothenate C9H17NO5---Pantothenic acid C9H17NO5	MS2	M-H	146.081	114.7		7.33	3.59	5.2	2.78			4.32	4.82	2.3		114.7	115.6	114.7	115.6			115.6	115.6	114.7		0.86	0.85	0.87	0.85			0.86	0.86	0.68		0.87	0.78	0.87	0.82			0.8	0.71	0.81
28	D-(+)-Pantothenic acid; LC-ESI-QTOF; MS2; CE C9H17NO5---D-PANTOTHENIC ACID C9H17NO5---Pantothenate C9H17NO5---Pantothenic acid C9H17NO5	MS2	M-H	88.0395	114.7		5.63	2.36	0.53	2.16			2.83	3.66	0		114.7	115.6	114.7	115.6			115.6	115.6	114.7		0.86	0.85	0.87	0.85			0.86	0.86	0.68		0.92	0.76	0.49	0.67			0.81	0.69	0
28	D-(+)-Pantothenic acid; LC-ESI-QTOF; MS2; CE C9H17NO5---D-PANTOTHENIC ACID C9H17NO5---Pantothenate C9H17NO5---Pantothenic acid C9H17NO5	MS2	M-H	675.143	114.7		0	0	0	0			0	0	0		114.7	115.6	114.7	115.6			115.6	115.6	114.7		0.86	0.85	0.87	0.85			0.86	0.86	0.68		0	0	0	0			0	0	0
28	D-(+)-Pantothenic acid; LC-ESI-QTOF; MS2; CE C9H17NO5---D-PANTOTHENIC ACID C9H17NO5---Pantothenate C9H17NO5---Pantothenic acid C9H17NO5	MS2	M-H	71.0513	114.7		0.26	2.8	0.87	3.49			1.76	0.91	0.61		114.7	115.6	114.7	115.6			115.6	115.6	114.7		0.86	0.85	0.87	0.85			0.86	0.86	0.68		0.42	0.69	0.64	0.67			0.69	0.62	0.71
28	D-(+)-Pantothenic acid; LC-ESI-QTOF; MS2; CE C9H17NO5---D-PANTOTHENIC ACID C9H17NO5---Pantothenate C9H17NO5---Pantothenic acid C9H17NO5	MS2	M-H	99.0461	114.7		0.1	0	0.1	1.12			0.2	0.41	0		114.7	115.6	114.7	115.6			115.6	115.6	114.7		0.86	0.85	0.87	0.85			0.86	0.86	0.68		0.54	0	0.37	0.55			0.56	0.6	0
28	D-(+)-Pantothenic acid; LC-ESI-QTOF; MS2; CE C9H17NO5---D-PANTOTHENIC ACID C9H17NO5---Pantothenate C9H17NO5---Pantothenic acid C9H17NO5	MS2	M-H	71.0138	114.7		0.13	0.26	0.17	0.26			0	0	0		114.7	115.6	114.7	115.6			115.6	115.6	114.7		0.86	0.85	0.87	0.85			0.86	0.86	0.68		0.54	0.51	0.18	0.6			0	0	0
29	Glucose C6H12O6---Mannose C6H12O6	MS1	M+HCOO	225.061	60.86	132.68	112.02	148.57	117.98	185.84	25.88	38.27	20.51	117.36	61.12	60.1	60.1	60.1	60.1	60.1	60.1	60.1	60.9	60.1	60.1	0.99	0.99	0.99	0.99	0.99	1	0.99	0.98	1	0.98	0.9	0.78	0.97	0.95	0.99	0.82	0.9	0.99	0.94	0.98
29	Glucose C6H12O6---Mannose C6H12O6	MS2	M+HCOO	59.014	60.86	249.47	368.51	503.92	389.9	496.53	95.18	142.19	45.2	189.85	223.82	60.1	60.1	60.1	60.1	60.1	60.1	60.1	60.9	60.1	60.1	0.99	0.99	0.99	0.99	0.99	1	0.99	0.98	1	0.98	0.88	0.79	0.91	0.94	0.97	0.86	0.87	0.99	0.94	0.98
29	Glucose C6H12O6---Mannose C6H12O6	MS2	M+HCOO	89.0244	60.86	55.71	129.1	123.99	101.09	150.91	37.99	35.54	28.55	53.98	114.73	60.1	60.1	60.1	60.1	60.1	60.1	60.1	60.9	60.1	60.1	0.99	0.99	0.99	0.99	0.99	1	0.99	0.98	1	0.98	0.81	0.67	0.97	0.99	0.99	0.6	0.88	0.82	0.89	0.9
29	Glucose C6H12O6---Mannose C6H12O6	MS2	M+HCOO	71.0139	60.86	68.13	110.23	145.65	112.67	145.37	23.11	38.78	12.99	50.07	72.22	60.1	60.1	60.1	60.1	60.1	60.1	60.1	60.9	60.1	60.1	0.99	0.99	0.99	0.99	0.99	1	0.99	0.98	1	0.98	0.86	0.74	0.93	0.95	0.96	0.82	0.87	0.99	0.94	0.98
29	Glucose C6H12O6---Mannose C6H12O6	MS2	M+HCOO	119.036	60.86	55.59	85.16	84.43	73.42	118.65	17.58	24.16	11.16	30.52	58.92	60.1	60.1	60.1	60.1	60.1	60.1	60.1	60.9	60.1	60.1	0.99	0.99	0.99	0.99	0.99	1	0.99	0.98	1	0.98	0.9	0.67	0.97	0.83	0.99	0.67	0.9	0.94	0.92	0.88
29	Glucose C6H12O6---Mannose C6H12O6	MS2	M+HCOO	113.024	60.86	35.63	50.49	59.08	45.72	71.48	11.72	13.45	6.44	22.26	32.38	60.1	60.1	60.1	60.1	60.1	60.1	60.1	60.9	60.1	60.1	0.99	0.99	0.99	0.99	0.99	1	0.99	0.98	1	0.98	0.92	0.7	0.96	0.87	0.99	0.75	0.9	0.95	0.91	0.91
29	Glucose C6H12O6---Mannose C6H12O6	MS2	M+HCOO	101.024	60.86	15.09	25.62	36.99	22.85	36.37	9.17	8.52	5.23	11.86	24.27	60.1	60.1	60.1	60.1	60.1	60.1	60.1	60.9	60.1	60.1	0.99	0.99	0.99	0.99	0.99	1	0.99	0.98	1	0.98	0.88	0.78	0.96	0.92	0.96	0.76	0.81	0.93	0.93	0.88
30	ISF of L-Carnosine; LC-ESI-QTOF; MS2; CE C9H14N4O3	MS1	-	154.062	64.78	179.36	170.19	339.75	227.93	349.18	101.71	103.01	63.99	269.27	103.08	63.4	63.4	64.5	64.5	63.4	64.5	63.4	64.5	63.4	63.4	0.97	0.97	0.95	0.98	0.99	1	0.98	0.97	0.98	0.98	0.93	0.83	0.85	0.92	0.92	0.85	0.75	0.66	0.88	0.72
30	ISF of L-Carnosine; LC-ESI-QTOF; MS2; CE C9H14N4O3	MS2	-	154.061	64.78	8.48	13.33	26.78	27.3	56.97	14.71	12.65	4.96	32.22	19.88	63.4	63.4	64.5	64.5	63.4	64.5	63.4	64.5	63.4	63.4	0.97	0.97	0.95	0.98	0.99	1	0.98	0.97	0.98	0.98	0.92	0.7	0.59	0.92	0.46	0.88	0.68	0.66	0.84	0.55
30	ISF of L-Carnosine; LC-ESI-QTOF; MS2; CE C9H14N4O3	MS2	-	93.0475	64.78	13.03	10.27	28.48	10.81	17.87	8.96	10.52	4.13	20.25	10.9	63.4	63.4	64.5	64.5	63.4	64.5	63.4	64.5	63.4	63.4	0.97	0.97	0.95	0.98	0.99	1	0.98	0.97	0.98	0.98	0.93	0.87	0.8	0.94	0.87	0.85	0.75	0.84	0.82	0.85
30	ISF of L-Carnosine; LC-ESI-QTOF; MS2; CE C9H14N4O3	MS2	-	137.034	64.78	5.72	8.47	16.86	15.95	17.97	8.97	8.07	2.27	20.09	7.95	63.4	63.4	64.5	64.5	63.4	64.5	63.4	64.5	63.4	63.4	0.97	0.97	0.95	0.98	0.99	1	0.98	0.97	0.98	0.98	0.93	0.78	0.64	0.85	0.61	0.83	0.66	0.57	0.88	0.64
30	ISF of L-Carnosine; LC-ESI-QTOF; MS2; CE C9H14N4O3	MS2	-	110.073	64.78	1.08	3.22	3.38	2.93	4.49	1.88	2.31	0.65	6.64	2.37	63.4	63.4	64.5	64.5	63.4	64.5	63.4	64.5	63.4	63.4	0.97	0.97	0.95	0.98	0.99	1	0.98	0.97	0.98	0.98	0.86	0.67	0.7	0.83	0.47	0.84	0.4	0.47	0.93	0.65
30	ISF of L-Carnosine; LC-ESI-QTOF; MS2; CE C9H14N4O3	MS2	-	81.0439	64.78	1.76	2.63	5.1	1.7	3.08	1.98	2.54	0	3.68	1.48	63.4	63.4	64.5	64.5	63.4	64.5	63.4	64.5	63.4	63.4	0.97	0.97	0.95	0.98	0.99	1	0.98	0.97	0.98	0.98	0.52	0.77	0.9	0.83	0.92	0.58	0.53	0	0.69	0.63
30	ISF of L-Carnosine; LC-ESI-QTOF; MS2; CE C9H14N4O3	MS2	-	67.0303	64.78	2.27	1.71	6.27	3.05	2.76	2.35	1.79	0.38	5.88	3.32	63.4	63.4	64.5	64.5	63.4	64.5	63.4	64.5	63.4	63.4	0.97	0.97	0.95	0.98	0.99	1	0.98	0.97	0.98	0.98	0.74	0.83	0.85	0.9	0.96	0.68	0.75	0.46	0.86	0.72
30	L-Carnosine; LC-ESI-QTOF; MS2; CE C9H14N4O3	MS1	M-H	225.099	64.78		0.06	1.47		1.22	0.48		51.96				64.8	64.8		64.8	64.8		64.5				0.55	0.58		0.6	0.65		0.98				0.9	0.78		0.51	0.76		0.91
30	L-Carnosine; LC-ESI-QTOF; MS2; CE C9H14N4O3	MS2	M-H	110.073	64.78		0	0.22		0.43	0.11		12.47				64.8	64.8		64.8	64.8		64.5				0.55	0.58		0.6	0.65		0.98				0	0.94		0.51	1		0.94
30	L-Carnosine; LC-ESI-QTOF; MS2; CE C9H14N4O3	MS2	M-H	154.062	64.78		2.34	3.34		2.86	1.4		11.61				64.8	64.8		64.8	64.8		64.5				0.55	0.58		0.6	0.65		0.98				0.9	0.78		0.74	0.76		0.91
30	L-Carnosine; LC-ESI-QTOF; MS2; CE C9H14N4O3	MS2	M-H	225.094	64.78		0.31	0		1.15	0		8.28				64.8	64.8		64.8	64.8		64.5				0.55	0.58		0.6	0.65		0.98				1	0		0.35	0		0.9
30	L-Carnosine; LC-ESI-QTOF; MS2; CE C9H14N4O3	MS2	M-H	59.0147	64.78		377.36	517.67		503.11	97.65		28.32				64.8	64.8		64.8	64.8		64.5				0.55	0.58		0.6	0.65		0.98				0.11	0.07		0.35	0.02		0.16
30	L-Carnosine; LC-ESI-QTOF; MS2; CE C9H14N4O3	MS2	M-H	81.046	64.78		0	0		0	0		1.2				64.8	64.8		64.8	64.8		64.5				0.55	0.58		0.6	0.65		0.98				0	0		0	0		0.9
30	L-Carnosine; LC-ESI-QTOF; MS2; CE C9H14N4O3	MS2	M-H	93.0449	64.78		1.49	1.88		0	0		0.5				64.8	64.8		64.8	64.8		64.5				0.55	0.58		0.6	0.65		0.98				0	0.51		0	0		0.7
31	Acamprosate; LC-ESI-ITFT; MS2; CE C5H11NO4S	MS1	M+HCOO	226.038	199.74			11.37		16.46			29.12	58.26	16.85			199.7		199.7			201	199.9	199.7			0.79		0.76			0.79	0.79	0.78			0.67		0.58			0.74	0.75	0.75
31	Acamprosate; LC-ESI-ITFT; MS2; CE C5H11NO4S	MS2	M+HCOO	226.038	199.74			3.14		13.14			10.95	36.29	15.76			199.7		199.7			201	199.9	199.7			0.79		0.76			0.79	0.79	0.78			0.67		0.62			0.87	0.92	0.75
31	Acamprosate; LC-ESI-ITFT; MS2; CE C5H11NO4S	MS2	M+HCOO	240.394	199.74			0		0			0	0	0			199.7		199.7			201	199.9	199.7			0.79		0.76			0.79	0.79	0.78			0		0			0	0	0
31	Acamprosate; LC-ESI-ITFT; MS2; CE C5H11NO4S	MS2	M+HCOO	79.958	199.74			2.57		1.29			2.66	5.08	1.74			199.7		199.7			201	199.9	199.7			0.79		0.76			0.79	0.79	0.78			0.85		0.58			0.74	0.75	0.89
31	Acamprosate; LC-ESI-ITFT; MS2; CE C5H11NO4S	MS2	M+HCOO	244.706	199.74			0		0			0	0	0			199.7		199.7			201	199.9	199.7			0.79		0.76			0.79	0.79	0.78			0		0			0	0	0
31	Acamprosate; LC-ESI-ITFT; MS2; CE C5H11NO4S	MS2	M+HCOO	242.628	199.74			0		0			0	0	0			199.7		199.7			201	199.9	199.7			0.79		0.76			0.79	0.79	0.78			0		0			0	0	0
31	Acamprosate; LC-ESI-ITFT; MS2; CE C5H11NO4S	MS2	M+HCOO	243.379	199.74			0		0			0	0	0			199.7		199.7			201	199.9	199.7			0.79		0.76			0.79	0.79	0.78			0		0			0	0	0
32	D-Ribose 5-phosphate [2M-H]- C5H11O8P NIST 1159911---D-Ribose 5-phosphate [M-H]- C5H11O8P NIST 1068441---D-Ribose 5-phosphate [M-H]- C5H11O8P NIST 1068442	MS1	M-H	229.014	56.91	58.52	56.97	102.02	121.51	267.96	48.38	35.79	46.24	261.53	114.23	59	59	56.7	56.7	55.6	56.7	56.7	59	57.8	56.7	0.98	0.97	1	1	0.99	0.99	1	0.97	1	1	0.81	0.74	0.69	0.72	0.94	0.86	0.73	0.71	0.82	0.83
32	D-Ribose 5-phosphate [2M-H]- C5H11O8P NIST 1159911---D-Ribose 5-phosphate [M-H]- C5H11O8P NIST 1068441---D-Ribose 5-phosphate [M-H]- C5H11O8P NIST 1068442	MS2	M-H	78.959	56.91	46.17	105.87	82.59	104.73	118.01	36.53	37.09	23.76	164.71	97.75	59	59	56.7	56.7	55.6	56.7	56.7	59	57.8	56.7	0.98	0.97	1	1	0.99	0.99	1	0.97	1	1	0.81	0.77	0.89	0.9	0.94	0.89	0.83	0.78	0.82	0.94
32	D-Ribose 5-phosphate [2M-H]- C5H11O8P NIST 1159911---D-Ribose 5-phosphate [M-H]- C5H11O8P NIST 1068441---D-Ribose 5-phosphate [M-H]- C5H11O8P NIST 1068442	MS2	M-H	96.968	56.91	9.44	20.99	13.8	17.55	11.71	8.24	7.59	12.33	18.13	15.06	59	59	56.7	56.7	55.6	56.7	56.7	59	57.8	56.7	0.98	0.97	1	1	0.99	0.99	1	0.97	1	1	0.81	0.74	0.69	0.72	0.98	0.86	0.73	0.71	0.8	0.75
32	D-Ribose 5-phosphate [2M-H]- C5H11O8P NIST 1159911---D-Ribose 5-phosphate [M-H]- C5H11O8P NIST 1068441---D-Ribose 5-phosphate [M-H]- C5H11O8P NIST 1068442	MS2	M-H	138.98	56.91	0	0	3.09	1.75	8.65	1.09	0.66	0	6.14	1.75	59	59	56.7	56.7	55.6	56.7	56.7	59	57.8	56.7	0.98	0.97	1	1	0.99	0.99	1	0.97	1	1	0	0	0.38	0.66	0.77	0.55	0.47	0	0.85	0.83
33	Diuron; LC-ESI-ITFT; MS2; CE C9H10Cl2N2O	MS1	M-H	231.009	642.87	464.42	450.69	433.25	456.6	462.31	456.87	427.55	451.09	445.5	434.86	642.8	642.8	642.8	642.8	642.8	642.8	642.8	642.8	642.8	642.8	0.98	0.98	0.98	0.98	0.94	0.93	0.91	0.97	0.91	0.97	0.95	0.9	0.88	0.82	0.95	0.75	0.86	0.93	0.88	0.98
33	Diuron; LC-ESI-ITFT; MS2; CE C9H10Cl2N2O	MS2	M-H	185.952	642.87	82.72	84.7	71.8	114.51	146.38	134.55	97.71	38.14	104.87	54.03	642.8	642.8	642.8	642.8	642.8	642.8	642.8	642.8	642.8	642.8	0.98	0.98	0.98	0.98	0.94	0.93	0.91	0.97	0.91	0.97	0.94	0.9	0.88	0.81	0.84	0.75	0.97	0.96	0.88	0.96
33	Diuron; LC-ESI-ITFT; MS2; CE C9H10Cl2N2O	MS2	M-H	231.01	642.87	104.61	125.93	95.46	153.17	261.59	309.8	235.84	59.24	239.75	79.37	642.8	642.8	642.8	642.8	642.8	642.8	642.8	642.8	642.8	642.8	0.98	0.98	0.98	0.98	0.94	0.93	0.91	0.97	0.91	0.97	0.95	0.83	0.77	0.82	0.77	0.74	0.86	0.93	0.79	0.99
33	Diuron; LC-ESI-ITFT; MS2; CE C9H10Cl2N2O	MS2	M-H	149.977	642.87	37.81	33.15	31.27	37.29	31.6	22.97	38.63	21.43	26.11	29.53	642.8	642.8	642.8	642.8	642.8	642.8	642.8	642.8	642.8	642.8	0.98	0.98	0.98	0.98	0.94	0.93	0.91	0.97	0.91	0.97	0.95	0.97	0.92	0.9	0.99	0.95	0.86	0.93	0.98	0.98
33	Diuron; LC-ESI-ITFT; MS2; CE C9H10Cl2N2O	MS2	M-H	132.866	642.87	14.02	16.41	14.6	13.75	20.33	15.76	34.91	13.65	25.73	32.72	642.8	642.8	642.8	642.8	642.8	642.8	642.8	642.8	642.8	642.8	0.98	0.98	0.98	0.98	0.94	0.93	0.91	0.97	0.91	0.97	0.63	0.6	0.59	0.52	0.8	0.51	0.6	0.38	0.81	0.62
33	Diuron; LC-ESI-ITFT; MS2; CE C9H10Cl2N2O	MS2	M-H	159.974	642.87	1.1	2.08	0.91	2.08	3.38	1.82	3.51	1.17	2.47	1.17	642.8	642.8	642.8	642.8	642.8	642.8	642.8	642.8	642.8	642.8	0.98	0.98	0.98	0.98	0.94	0.93	0.91	0.97	0.91	0.97	0.81	0.89	0.43	0.78	0.95	0.61	0.8	0.24	0.88	0.92
34	L-Anserine; LC-ESI-QTOF; MS2; CE C10H16N4O3	MS1	M-H	239.114	71.43								177.61										71.2										0.9										0.95
34	L-Anserine; LC-ESI-QTOF; MS2; CE C10H16N4O3	MS2	M-H	168.077	71.43								28.17										71.2										0.9										0.96
34	L-Anserine; LC-ESI-QTOF; MS2; CE C10H16N4O3	MS2	M-H	151.05	71.43								6.54										71.2										0.9										0.93
34	L-Anserine; LC-ESI-QTOF; MS2; CE C10H16N4O3	MS2	M-H	223.028	71.43								12.04										71.2										0.9										0.64
34	L-Anserine; LC-ESI-QTOF; MS2; CE C10H16N4O3	MS2	M-H	58.0315	71.43								8.18										71.2										0.9										0.85
34	L-Anserine; LC-ESI-QTOF; MS2; CE C10H16N4O3	MS2	M-H	166.099	71.43								5.85										71.2										0.9										0.92
34	L-Anserine; LC-ESI-QTOF; MS2; CE C10H16N4O3	MS2	M-H	239.116	71.43								18.84										71.2										0.9										0.95
35	URIDINE C9H12N2O6---Uridine C9H12N2O6---Uridine C9H12N2O6 MassBank 3945	MS1	M-H	243.062	119.74	348.87	378.61	395.97	389.87	594.31	46.01	44.08		120.43	108.31	121.1	120	120	121.1	120	120	120		120	120	0.99	0.94	0.99	0.99	0.95	0.88	0.85		0.99	0.92	0.93	0.84	0.86	0.91	0.92	0.77	0.65		0.76	0.81
35	URIDINE C9H12N2O6---Uridine C9H12N2O6---Uridine C9H12N2O6 MassBank 3945	MS2	M-H	110.025	119.74	18.42	44.81	11.64	16.66	37.91	4.28	1.55		7.59	14.36	121.1	120	120	121.1	120	120	120		120	120	0.99	0.94	0.99	0.99	0.95	0.88	0.85		0.99	0.92	0.93	0.84	0.92	0.85	0.75	0.78	0.68		0.76	0.85
35	URIDINE C9H12N2O6---Uridine C9H12N2O6---Uridine C9H12N2O6 MassBank 3945	MS2	M-H	82.0299	119.74	3.28	5.82	3.42	5.95	4.98	0	0.88		1.99	1.12	121.1	120	120	121.1	120	120	120		120	120	0.99	0.94	0.99	0.99	0.95	0.88	0.85		0.99	0.92	0.65	0.86	0.76	0.91	0.94	0	0.56		0.72	0.76
35	URIDINE C9H12N2O6---Uridine C9H12N2O6---Uridine C9H12N2O6 MassBank 3945	MS2	M-H	111.021	119.74	13.9	23.93	8.97	12.36	20.71	5.3	2.37		6.23	6.76	121.1	120	120	121.1	120	120	120		120	120	0.99	0.94	0.99	0.99	0.95	0.88	0.85		0.99	0.92	0.89	0.79	0.86	0.92	0.77	0.66	0.65		0.8	0.81
35	URIDINE C9H12N2O6---Uridine C9H12N2O6---Uridine C9H12N2O6 MassBank 3945	MS2	M-H	152.036	119.74	6.06	10.67	3.9	4.83	8.03	2.15	0		1.52	3.33	121.1	120	120	121.1	120	120	120		120	120	0.99	0.94	0.99	0.99	0.95	0.88	0.85		0.99	0.92	0.96	0.8	0.75	0.69	0.75	0.74	0		0.7	0.7
35	URIDINE C9H12N2O6---Uridine C9H12N2O6---Uridine C9H12N2O6 MassBank 3945	MS2	M-H	66.0352	119.74	1.9	0.92	1.38	1.16	1.91	0.25	0.25		0.71	0	121.1	120	120	121.1	120	120	120		120	120	0.99	0.94	0.99	0.99	0.95	0.88	0.85		0.99	0.92	0.74	0.75	0.75	0.61	0.92	0.77	0.45		0.75	0
35	URIDINE C9H12N2O6---Uridine C9H12N2O6---Uridine C9H12N2O6 MassBank 3945	MS2	M-H	140.034	119.74	2.18	5.9	1.33	1.87	4.89	1.15	0		1.15	3.01	121.1	120	120	121.1	120	120	120		120	120	0.99	0.94	0.99	0.99	0.95	0.88	0.85		0.99	0.92	0.76	0.83	0.68	0.65	0.59	0.54	0		0.71	0.67
36	Taurine [M-H]- C2H7NO3S NIST 1173842	MS1	2M-H	249.021	57.88	15.15	18.11	21.54	24.86	39.44	7.95	9.2	61.63	26.95	7.34	56.7	57.8	57.9	57.8	57.8	57.9	57.9	57.9	57.8	57.9	0.99	0.99	0.98	0.99	0.99	0.99	0.99	0.99	0.99	0.98	0.89	0.8	0.8	0.86	0.88	0.81	0.87	0.96	0.94	0.93
36	Taurine [M-H]- C2H7NO3S NIST 1173842	MS2	2M-H	124.007	57.88	225.91	203.21	268.61	360.67	522.99	190.18	172.1	804.17	462.55	161.26	56.7	57.8	57.9	57.8	57.8	57.9	57.9	57.9	57.8	57.9	0.99	0.99	0.98	0.99	0.99	0.99	0.99	0.99	0.99	0.98	0.89	0.78	0.8	0.93	0.92	0.92	0.87	0.87	0.94	0.98
36	Taurine [M-H]- C2H7NO3S NIST 1173842	MS2	2M-H	79.9574	57.88	12.8	12.53	17.29	18.97	29.97	8.53	10.8	99.51	25.39	9.36	56.7	57.8	57.9	57.8	57.8	57.9	57.9	57.9	57.8	57.9	0.99	0.99	0.98	0.99	0.99	0.99	0.99	0.99	0.99	0.98	0.96	0.8	0.76	0.81	0.88	0.81	0.84	0.96	0.94	0.93
36	Taurine [M-H]- C2H7NO3S NIST 1173842	MS2	2M-H	248.971	57.88	15.41	15.63	9.59	10.79	15.08	148.99	177.3	12.62	18.84	198.35	56.7	57.8	57.9	57.8	57.8	57.9	57.9	57.9	57.8	57.9	0.99	0.99	0.98	0.99	0.99	0.99	0.99	0.99	0.99	0.98	0.86	0.58	0.61	0.86	0.64	0.21	0.15	0.57	0.88	0.2
36	Taurine [M-H]- C2H7NO3S NIST 1173842	MS2	2M-H	123.632	57.88	2.87	3.01	0.8	1.94	2.1	0.69	1.48	6.79	1.76	0.69	56.7	57.8	57.9	57.8	57.8	57.9	57.9	57.9	57.8	57.9	0.99	0.99	0.98	0.99	0.99	0.99	0.99	0.99	0.99	0.98	0.85	0.56	0.67	0.67	0.54	0.65	0.42	0.97	0.99	0.93
36	Taurine [M-H]- C2H7NO3S NIST 1173842	MS2	2M-H	144.96	57.88	0.37	0	0	0	0	0.87	0.74	0	0	0	56.7	57.8	57.9	57.8	57.8	57.9	57.9	57.9	57.8	57.9	0.99	0.99	0.98	0.99	0.99	0.99	0.99	0.99	0.99	0.98	0.05	0	0	0	0	0.59	0.54	0	0	0
36	Taurine [M-H]- C2H7NO3S NIST 1173842	MS2	2M-H	106.979	57.88	1.7	1.75	2.33	1.92	4.13	2.13	1.38	6.07	3.38	0.64	56.7	57.8	57.9	57.8	57.8	57.9	57.9	57.9	57.8	57.9	0.99	0.99	0.98	0.99	0.99	0.99	0.99	0.99	0.99	0.98	0.82	0.8	0.83	0.74	0.85	0.6	0.91	0.93	0.87	0.89
37	.alpha.-D-Galactose 1-phosphate [2M-H]- C6H13O9P NIST 1159669---.alpha.-D-Galactose 1-phosphate [M-H]- C6H13O9P NIST 1159738---.alpha.-D-Mannose 1-phosphate [M-H]- C6H13O9P NIST 1159815---D-Glucose 6-phosphate [2M-H]- C6H13O9P NIST 1178368---D-Mannose 6-phosphate [2M-H]- C6H13O9P NIST 1159962---D-Mannose 6-phosphate [M-H]- C6H13O9P NIST 1068451---D-Mannose 6-phosphate [M-H]- C6H13O9P NIST 1068452…	MS1	M-H	259.021	56.02	315.85	226.83	284.12	362.47	521.69	151.57	189.34	1122.5	409.37	264.08	55.6	55.6	55.6	55.6	55.6	55.6	55.6	55.6	55.6	55.6	0.96	0.93	0.95	0.91	0.82	1	0.99	0.93	0.99	0.97	0.96	0.97	0.96	0.86	0.9	0.83	0.95	0.89	0.95	0.86
37	.alpha.-D-Galactose 1-phosphate [2M-H]- C6H13O9P NIST 1159669---.alpha.-D-Galactose 1-phosphate [M-H]- C6H13O9P NIST 1159738---.alpha.-D-Mannose 1-phosphate [M-H]- C6H13O9P NIST 1159815---D-Glucose 6-phosphate [2M-H]- C6H13O9P NIST 1178368---D-Mannose 6-phosphate [2M-H]- C6H13O9P NIST 1159962---D-Mannose 6-phosphate [M-H]- C6H13O9P NIST 1068451---D-Mannose 6-phosphate [M-H]- C6H13O9P NIST 1068452…	MS2	M-H	78.9591	56.02	84.11	38.17	76.78	80.32	116.18	69.96	42.35	182.4	123.88	94.77	55.6	55.6	55.6	55.6	55.6	55.6	55.6	55.6	55.6	55.6	0.96	0.93	0.95	0.91	0.82	1	0.99	0.93	0.99	0.97	0.96	0.97	0.96	0.85	0.9	0.79	0.92	0.99	0.99	0.97
37	.alpha.-D-Galactose 1-phosphate [2M-H]- C6H13O9P NIST 1159669---.alpha.-D-Galactose 1-phosphate [M-H]- C6H13O9P NIST 1159738---.alpha.-D-Mannose 1-phosphate [M-H]- C6H13O9P NIST 1159815---D-Glucose 6-phosphate [2M-H]- C6H13O9P NIST 1178368---D-Mannose 6-phosphate [2M-H]- C6H13O9P NIST 1159962---D-Mannose 6-phosphate [M-H]- C6H13O9P NIST 1068451---D-Mannose 6-phosphate [M-H]- C6H13O9P NIST 1068452…	MS2	M-H	96.9691	56.02	50.74	29.05	59.9	63.16	68.82	59.59	46.6	393.89	119.83	117.11	55.6	55.6	55.6	55.6	55.6	55.6	55.6	55.6	55.6	55.6	0.96	0.93	0.95	0.91	0.82	1	0.99	0.93	0.99	0.97	0.94	0.97	0.99	0.88	0.91	0.83	0.98	0.88	0.95	0.86
37	.alpha.-D-Galactose 1-phosphate [2M-H]- C6H13O9P NIST 1159669---.alpha.-D-Galactose 1-phosphate [M-H]- C6H13O9P NIST 1159738---.alpha.-D-Mannose 1-phosphate [M-H]- C6H13O9P NIST 1159815---D-Glucose 6-phosphate [2M-H]- C6H13O9P NIST 1178368---D-Mannose 6-phosphate [2M-H]- C6H13O9P NIST 1159962---D-Mannose 6-phosphate [M-H]- C6H13O9P NIST 1068451---D-Mannose 6-phosphate [M-H]- C6H13O9P NIST 1068452…	MS2	M-H	259.024	56.02	35.06	26.33	105.18	51.36	141.36	8.94	8.96	102.36	21.31	25.05	55.6	55.6	55.6	55.6	55.6	55.6	55.6	55.6	55.6	55.6	0.96	0.93	0.95	0.91	0.82	1	0.99	0.93	0.99	0.97	0.98	0.95	0.46	0.86	0.8	0.85	0.95	0.89	0.95	0.86
37	.alpha.-D-Galactose 1-phosphate [2M-H]- C6H13O9P NIST 1159669---.alpha.-D-Galactose 1-phosphate [M-H]- C6H13O9P NIST 1159738---.alpha.-D-Mannose 1-phosphate [M-H]- C6H13O9P NIST 1159815---D-Glucose 6-phosphate [2M-H]- C6H13O9P NIST 1178368---D-Mannose 6-phosphate [2M-H]- C6H13O9P NIST 1159962---D-Mannose 6-phosphate [M-H]- C6H13O9P NIST 1068451---D-Mannose 6-phosphate [M-H]- C6H13O9P NIST 1068452…	MS2	M-H	259.037	56.02	0	0	0	0	0	3.85	6.25	0	0	0	55.6	55.6	55.6	55.6	55.6	55.6	55.6	55.6	55.6	55.6	0.96	0.93	0.95	0.91	0.82	1	0.99	0.93	0.99	0.97	0	0	0	0	0	0.74	0.87	0	0	0
37	.alpha.-D-Galactose 1-phosphate [2M-H]- C6H13O9P NIST 1159669---.alpha.-D-Galactose 1-phosphate [M-H]- C6H13O9P NIST 1159738---.alpha.-D-Mannose 1-phosphate [M-H]- C6H13O9P NIST 1159815---D-Glucose 6-phosphate [2M-H]- C6H13O9P NIST 1178368---D-Mannose 6-phosphate [2M-H]- C6H13O9P NIST 1159962---D-Mannose 6-phosphate [M-H]- C6H13O9P NIST 1068451---D-Mannose 6-phosphate [M-H]- C6H13O9P NIST 1068452…	MS2	M-H	110.992	56.02	0	0	0	1.89	0	0	0	0.38	0	0	55.6	55.6	55.6	55.6	55.6	55.6	55.6	55.6	55.6	55.6	0.96	0.93	0.95	0.91	0.82	1	0.99	0.93	0.99	0.97	0	0	0	0.19	0	0	0	0.09	0	0
37	1-Deoxy-D-xylulose 5-phosphate [M-H]- C5H11O7P NIST 1114345	MS1	M+HCOO	259.022	55.62	315.85	226.83	284.12	362.47	521.69	151.57	189.34	1122.5	409.37	264.08	55.6	55.6	55.6	55.6	55.6	55.6	55.6	55.6	55.6	55.6	0.94	0.92	0.97	0.94	0.88	0.97	0.93	0.86	0.91	0.96	0.96	0.97	0.96	0.86	0.9	0.85	0.95	0.95	0.95	0.88
37	1-Deoxy-D-xylulose 5-phosphate [M-H]- C5H11O7P NIST 1114345	MS2	M+HCOO	78.9591	55.62	84.11	38.17	76.78	80.32	116.18	69.96	42.35	182.4	123.88	94.77	55.6	55.6	55.6	55.6	55.6	55.6	55.6	55.6	55.6	55.6	0.94	0.92	0.97	0.94	0.88	0.97	0.93	0.86	0.91	0.96	0.96	0.97	0.96	0.85	0.9	0.79	0.92	0.99	0.99	0.97
37	1-Deoxy-D-xylulose 5-phosphate [M-H]- C5H11O7P NIST 1114345	MS2	M+HCOO	96.9697	55.62	50.74	29.05	59.9	63.16	68.82	59.59	46.6	393.89	119.83	117.11	55.6	55.6	55.6	55.6	55.6	55.6	55.6	55.6	55.6	55.6	0.94	0.92	0.97	0.94	0.88	0.97	0.93	0.86	0.91	0.96	0.94	0.97	0.99	0.88	0.91	0.83	0.98	0.88	0.95	0.86
37	1-Deoxy-D-xylulose 5-phosphate [M-H]- C5H11O7P NIST 1114345	MS2	M+HCOO	259.02	55.62	35.06	27.97	105.18	51.36	141.36	8.28	8.96	102.36	21.31	25.05	55.6	55.6	55.6	55.6	55.6	55.6	55.6	55.6	55.6	55.6	0.94	0.92	0.97	0.94	0.88	0.97	0.93	0.86	0.91	0.96	0.98	0.96	0.46	0.86	0.8	0.86	0.95	0.89	0.95	0.86
37	1-Deoxy-D-xylulose 5-phosphate [M-H]- C5H11O7P NIST 1114345	MS2	M+HCOO	138.974	55.62	3.62	2.83	4.85	3.37	6.74	3.38	0.97	36.9	7.99	7.89	55.6	55.6	55.6	55.6	55.6	55.6	55.6	55.6	55.6	55.6	0.94	0.92	0.97	0.94	0.88	0.97	0.93	0.86	0.91	0.96	0.96	0.87	0.81	0.69	0.84	0.85	0.55	0.95	0.95	0.88
37	1-Deoxy-D-xylulose 5-phosphate [M-H]- C5H11O7P NIST 1114345	MS2	M+HCOO	96.9598	55.62	25.4	18.35	0.69	24.8	4.99	14.46	23.28	222.49	87.63	0	55.6	55.6	55.6	55.6	55.6	55.6	55.6	55.6	55.6	55.6	0.94	0.92	0.97	0.94	0.88	0.97	0.93	0.86	0.91	0.96	0.63	0.78	0.48	0.61	0.45	0.62	0.79	0.62	0.83	0
37	1-Deoxy-D-xylulose 5-phosphate [M-H]- C5H11O7P NIST 1114345	MS2	M+HCOO	259.042	55.62	0	0	0	0	0	1.4	0	0	0	0	55.6	55.6	55.6	55.6	55.6	55.6	55.6	55.6	55.6	55.6	0.94	0.92	0.97	0.94	0.88	0.97	0.93	0.86	0.91	0.96	0	0	0	0	0	0.45	0	0	0	0
38	Dodecyl sulfate; PlaSMA ID-444 C12H26O4S	MS1	M-H	265.147	740.08	459.55	426.97	424.32	552.97	481.54	471.87	479.51	420.49	524.42	421.18	740.5	740.5	740.5	739.3	740.5	740.5	740.5	740.5	739.3	739.3	0.98	0.97	0.85	0.88	0.98	0.97	0.87	0.98	0.98	0.88	0.9	0.77	0.71	0.8	0.97	0.76	0.76	0.96	0.95	0.72
38	Dodecyl sulfate; PlaSMA ID-444 C12H26O4S	MS2	M-H	96.9603	740.08	67.36	146.98	39	74.84	60.17	45.14	56.33	51.94	52.72	44.12	740.5	740.5	740.5	739.3	740.5	740.5	740.5	740.5	739.3	739.3	0.98	0.97	0.85	0.88	0.98	0.97	0.87	0.98	0.98	0.88	0.97	0.77	0.96	0.95	0.97	0.97	0.93	0.96	0.98	0.93
38	Dodecyl sulfate; PlaSMA ID-444 C12H26O4S	MS2	M-H	265.147	740.08	134.98	259.51	287.92	341.97	129.48	179.26	339.11	135.74	125.62	198.34	740.5	740.5	740.5	739.3	740.5	740.5	740.5	740.5	739.3	739.3	0.98	0.97	0.85	0.88	0.98	0.97	0.87	0.98	0.98	0.88	0.9	0.8	0.71	0.62	0.97	0.76	0.75	0.96	0.95	0.72
38	Dodecyl sulfate; PlaSMA ID-444 C12H26O4S	MS2	M-H	79.958	740.08	0.41	2.28	0.28	0.83	1.6	0.28	1.61	0.41	1.15	0	740.5	740.5	740.5	739.3	740.5	740.5	740.5	740.5	739.3	739.3	0.98	0.97	0.85	0.88	0.98	0.97	0.87	0.98	0.98	0.88	0.54	0.52	0.34	0.8	0.85	0.54	0.76	0.64	0.79	0
38	Dodecyl sulfate; PlaSMA ID-444 C12H26O4S	MS2	M-H	136.924	740.08	0	0.48	0	0	0	0	0	0	0	0	740.5	740.5	740.5	739.3	740.5	740.5	740.5	740.5	739.3	739.3	0.98	0.97	0.85	0.88	0.98	0.97	0.87	0.98	0.98	0.88	0	0.55	0	0	0	0	0	0	0	0
39	Adenosine C10H13N5O4---Adenosine C10H13N5O4 MassBank 2676---Adenosine C10H13N5O4 MoNA 436595---Adenosine; LC-ESI-QTOF; MS2; CE C10H13N5O4	MS1	M-H	266.089	291.8	22.15		20.84								290.9		291.8								1		0.98								0.57		0.72
39	Adenosine C10H13N5O4---Adenosine C10H13N5O4 MassBank 2676---Adenosine C10H13N5O4 MoNA 436595---Adenosine; LC-ESI-QTOF; MS2; CE C10H13N5O4	MS2	M-H	134.047	291.8	6.25		7.44								290.9		291.8								1		0.98								0.86		0.97
39	Adenosine C10H13N5O4---Adenosine C10H13N5O4 MassBank 2676---Adenosine C10H13N5O4 MoNA 436595---Adenosine; LC-ESI-QTOF; MS2; CE C10H13N5O4	MS2	M-H	107.036	291.8	0.32		1.17								290.9		291.8								1		0.98								0.57		0.72
39	ISF of Adenosine C10H13N5O4---Adenosine C10H13N5O4 MassBank 2676---Adenosine C10H13N5O4 MoNA 436595---Adenosine; LC-ESI-QTOF; MS2; CE C10H13N5O4	MS1	-	134.047	291.86	32.59		30.11	34.16						17.83	290.9		292	292						291.9	0.96		0.93	0.94						0.94	0.89		0.51	0.58						0.7
39	ISF of Adenosine C10H13N5O4---Adenosine C10H13N5O4 MassBank 2676---Adenosine C10H13N5O4 MoNA 436595---Adenosine; LC-ESI-QTOF; MS2; CE C10H13N5O4	MS2	-	134.047	291.86	9.01		1.72	3.09						6.06	290.9		292	292						291.9	0.96		0.93	0.94						0.94	0.89		0.94	0.58						0.81
39	ISF of Adenosine C10H13N5O4---Adenosine C10H13N5O4 MassBank 2676---Adenosine C10H13N5O4 MoNA 436595---Adenosine; LC-ESI-QTOF; MS2; CE C10H13N5O4	MS2	-	107.035	291.86	3.44		0.43	0.96						1.96	290.9		292	292						291.9	0.96		0.93	0.94						0.94	0.9		0.51	0.63						0.7
39	ISF of Adenosine C10H13N5O4---Adenosine C10H13N5O4 MassBank 2676---Adenosine C10H13N5O4 MoNA 436595---Adenosine; LC-ESI-QTOF; MS2; CE C10H13N5O4	MS2	-	116.92	291.86	0		0	0						0	290.9		292	292						291.9	0.96		0.93	0.94						0.94	0		0	0						0
39	ISF of Adenosine C10H13N5O4---Adenosine C10H13N5O4 MassBank 2676---Adenosine C10H13N5O4 MoNA 436595---Adenosine; LC-ESI-QTOF; MS2; CE C10H13N5O4	MS2	-	65.0144	291.86	0.17		0	0						0	290.9		292	292						291.9	0.96		0.93	0.94						0.94	0.67		0	0						0
39	ISF of Adenosine C10H13N5O4---Adenosine C10H13N5O4 MassBank 2676---Adenosine C10H13N5O4 MoNA 436595---Adenosine; LC-ESI-QTOF; MS2; CE C10H13N5O4	MS2	-	101.928	291.86	0		0	0						0	290.9		292	292						291.9	0.96		0.93	0.94						0.94	0		0	0						0
40	ISF of Inosine C10H12N4O5---Inosine C10H12N4O5 MoNA 439079---Inosine; LC-ESI-QTOF; MS2; CE C10H12N4O5	MS1	-	135.031	184.87		30.38	38.38		47.47				26.87			184.4	185.5		184.4				184.9			0.81	0.89		0.96				0.98			0.54	0.67		0.72				0.62
40	ISF of Inosine C10H12N4O5---Inosine C10H12N4O5 MoNA 439079---Inosine; LC-ESI-QTOF; MS2; CE C10H12N4O5	MS2	-	92.0257	184.87		0.49	3.33		2.35				0.94			184.4	185.5		184.4				184.9			0.81	0.89		0.96				0.98			0.54	0.74		0.73				0.69
40	ISF of Inosine C10H12N4O5---Inosine C10H12N4O5 MoNA 439079---Inosine; LC-ESI-QTOF; MS2; CE C10H12N4O5	MS2	-	135.031	184.87		2.42	7.06		5.14				3.92			184.4	185.5		184.4				184.9			0.81	0.89		0.96				0.98			0.66	0.59		0.72				0.55
40	ISF of Inosine C10H12N4O5---Inosine C10H12N4O5 MoNA 439079---Inosine; LC-ESI-QTOF; MS2; CE C10H12N4O5	MS2	-	65.0151	184.87		0.33	1.49		0.5				0.58			184.4	185.5		184.4				184.9			0.81	0.89		0.96				0.98			0.54	0.67		0.56				0.62
40	Inosine C10H12N4O5---Inosine C10H12N4O5 MoNA 439079---Inosine; LC-ESI-QTOF; MS2; CE C10H12N4O5	MS1	M-H	267.073	184.7	1015.3	835.58	1092.81	876.82	1447.63	275.04	180.26	349.72	612.32	653.7	185.5	184.4	185.5	186.6	184.4	185.5	185.5	185.5	185.5	185.5	0.94	1	0.9	0.99	0.93	0.98	0.69	0.99	0.88	0.97	0.94	0.89	0.83	0.92	0.82	0.8	0.85	0.81	0.81	0.88
40	Inosine C10H12N4O5---Inosine C10H12N4O5 MoNA 439079---Inosine; LC-ESI-QTOF; MS2; CE C10H12N4O5	MS2	M-H	135.031	184.7	680.55	426.82	814.12	419.13	613.69	142	68.57	198.26	283.83	416.17	185.5	184.4	185.5	186.6	184.4	185.5	185.5	185.5	185.5	185.5	0.94	1	0.9	0.99	0.93	0.98	0.69	0.99	0.88	0.97	0.94	0.89	0.87	0.92	0.82	0.99	0.95	0.79	0.95	0.86
40	Inosine C10H12N4O5---Inosine C10H12N4O5 MoNA 439079---Inosine; LC-ESI-QTOF; MS2; CE C10H12N4O5	MS2	M-H	267.072	184.7	234.84	344.73	267.94	121.19	285.82	23.83	76.33	38.89	134.84	142.73	185.5	184.4	185.5	186.6	184.4	185.5	185.5	185.5	185.5	185.5	0.94	1	0.9	0.99	0.93	0.98	0.69	0.99	0.88	0.97	0.82	0.42	0.83	0.92	0.8	0.72	0.65	0.89	0.7	0.88
40	Inosine C10H12N4O5---Inosine C10H12N4O5 MoNA 439079---Inosine; LC-ESI-QTOF; MS2; CE C10H12N4O5	MS2	M-H	108.02	184.7	25.17	17.81	20.11	19.67	14.46	6.37	2.56	9.27	13.51	11.18	185.5	184.4	185.5	186.6	184.4	185.5	185.5	185.5	185.5	185.5	0.94	1	0.9	0.99	0.93	0.98	0.69	0.99	0.88	0.97	0.97	0.85	0.8	0.88	0.83	0.8	0.85	0.81	0.72	0.9
40	Inosine C10H12N4O5---Inosine C10H12N4O5 MoNA 439079---Inosine; LC-ESI-QTOF; MS2; CE C10H12N4O5	MS2	M-H	92.0252	184.7	12.15	8.62	10.38	8.6	8.54	2.41	1.48	5.98	8.24	4.62	185.5	184.4	185.5	186.6	184.4	185.5	185.5	185.5	185.5	185.5	0.94	1	0.9	0.99	0.93	0.98	0.69	0.99	0.88	0.97	0.83	0.92	0.65	0.94	0.61	0.78	0.83	0.72	0.81	0.83
40	Inosine C10H12N4O5---Inosine C10H12N4O5 MoNA 439079---Inosine; LC-ESI-QTOF; MS2; CE C10H12N4O5	MS2	M-H	134.622	184.7	2.79	0.95	4.41	1.84	3.79	0	0	1.07	0.48	0.77	185.5	184.4	185.5	186.6	184.4	185.5	185.5	185.5	185.5	185.5	0.94	1	0.9	0.99	0.93	0.98	0.69	0.99	0.88	0.97	0.85	0.67	0.56	0.87	0.66	0	0	0.55	0.55	0.66
40	Inosine C10H12N4O5---Inosine C10H12N4O5 MoNA 439079---Inosine; LC-ESI-QTOF; MS2; CE C10H12N4O5	MS2	M-H	149.046	184.7	4.68	0.87	5.44	2.12	3.38	0	0	1.38	1.13	2.07	185.5	184.4	185.5	186.6	184.4	185.5	185.5	185.5	185.5	185.5	0.94	1	0.9	0.99	0.93	0.98	0.69	0.99	0.88	0.97	0.84	0.62	0.74	0.77	0.58	0	0	0.58	0.42	0.69
41	C14-SAS (TENTATIVE) C14H30O3S	MS1	M-H	277.184	753.81	97.21	97.56	103.32	104.03	92.31	101.03	110.95	98.18	93.04	97.97	753.8	753.8	753.8	753.8	753.8	753.8	753.8	753.8	753.8	753.8	0.97	0.95	0.92	0.93	0.93	0.98	0.94	0.97	0.97	0.94	0.74	0.74	0.78	0.9	0.63	0.86	0.89	0.88	0.84	0.71
41	C14-SAS (TENTATIVE) C14H30O3S	MS2	M-H	277.183	753.81	30.76	40.26	44.55	22.72	25.55	28.08	40.48	24.64	25.63	26.67	753.8	753.8	753.8	753.8	753.8	753.8	753.8	753.8	753.8	753.8	0.97	0.95	0.92	0.93	0.93	0.98	0.94	0.97	0.97	0.94	0.87	0.74	0.78	0.9	0.88	0.86	0.97	0.88	0.91	0.83
41	C14-SAS (TENTATIVE) C14H30O3S	MS2	M-H	79.9579	753.81	6.59	6.66	7.49	8.46	5.86	8.82	6.41	8.34	5.53	4.54	753.8	753.8	753.8	753.8	753.8	753.8	753.8	753.8	753.8	753.8	0.97	0.95	0.92	0.93	0.93	0.98	0.94	0.97	0.97	0.94	0.74	0.87	0.83	0.94	0.63	0.87	0.89	0.88	0.84	0.71
41	C14-SAS (TENTATIVE) C14H30O3S	MS2	M-H	144.944	753.81	2.6	0.99	2.29	0	0	3.59	2.72	1.73	2.41	0	753.8	753.8	753.8	753.8	753.8	753.8	753.8	753.8	753.8	753.8	0.97	0.95	0.92	0.93	0.93	0.98	0.94	0.97	0.97	0.94	0.24	0.32	0.35	0	0	0.51	0.27	0.44	0.29	0
41	C14-SAS (TENTATIVE) C14H30O3S	MS2	M-H	162.956	753.81	1.18	0	0	0	0	0.26	0	0	0	0.26	753.8	753.8	753.8	753.8	753.8	753.8	753.8	753.8	753.8	753.8	0.97	0.95	0.92	0.93	0.93	0.98	0.94	0.97	0.97	0.94	0.38	0	0	0	0	0.32	0	0	0	0.35
41	C14-SAS (TENTATIVE) C14H30O3S	MS2	M-H	208.958	753.81	0	0	0.15	0	0	0	0	0	0	0	753.8	753.8	753.8	753.8	753.8	753.8	753.8	753.8	753.8	753.8	0.97	0.95	0.92	0.93	0.93	0.98	0.94	0.97	0.97	0.94	0	0	0.31	0	0	0	0	0	0	0
41	C14-SAS (TENTATIVE) C14H30O3S	MS2	M-H	80.9664	753.81	0	0.37	0	0	0	0	0	0	0	0	753.8	753.8	753.8	753.8	753.8	753.8	753.8	753.8	753.8	753.8	0.97	0.95	0.92	0.93	0.93	0.98	0.94	0.97	0.97	0.94	0	0.34	0	0	0	0	0	0	0	0
42	Guanosine C10H13N5O5---Guanosine; LC-ESI-QTOF; MS2; CE C10H13N5O5	MS1	M-H	282.083	196.68	42.31	25.79	51.4	38.91	65.21	8.48		2.43	36.73	16.67	197.7	196.6	197.7	198.8	196.6	196.7		196.7	197.7	196.7	0.98	0.98	0.99	0.99	1	0.94		0.96	1	0.98	0.73	0.9	0.91	0.91	0.82	0.53		0.74	0.81	0.7
42	Guanosine C10H13N5O5---Guanosine; LC-ESI-QTOF; MS2; CE C10H13N5O5	MS2	M-H	150.043	196.68	9.6	7.36	13.59	21.79	20.67	2.25		3.33	14.26	2.62	197.7	196.6	197.7	198.8	196.6	196.7		196.7	197.7	196.7	0.98	0.98	0.99	0.99	1	0.94		0.96	1	0.98	0.8	0.92	0.91	0.94	0.77	0.58		0.74	0.89	0.74
42	Guanosine C10H13N5O5---Guanosine; LC-ESI-QTOF; MS2; CE C10H13N5O5	MS2	M-H	133.016	196.68	5.29	4.95	6.65	7.67	10.98	0.24		0.95	2.95	1.53	197.7	196.6	197.7	198.8	196.6	196.7		196.7	197.7	196.7	0.98	0.98	0.99	0.99	1	0.94		0.96	1	0.98	0.67	0.9	0.88	0.91	0.85	0.53		0.8	0.81	0.7
42	Guanosine C10H13N5O5---Guanosine; LC-ESI-QTOF; MS2; CE C10H13N5O5	MS2	M-H	108.019	196.68	1.23	1.71	2.72	1.33	3.4	0		0	0.96	0.53	197.7	196.6	197.7	198.8	196.6	196.7		196.7	197.7	196.7	0.98	0.98	0.99	0.99	1	0.94		0.96	1	0.98	0.73	0.88	0.91	0.6	0.82	0		0	0.5	0.7
43	Xanthosine (Not validated); PlaSMA ID-511 C10H12N4O6---Xanthosine C10H12N4O6---Xanthosine C10H12N4O6 MoNA 439175---Xanthosine; LC-ESI-QTOF; MS2; CE C10H12N4O6	MS1	M-H	283.067	85.57	110.52	133.88	124.92	107.11	209.5			2.72	60.63	52.11	87.8	87.8	87.8	87.8	87.8			85.6	87.8	87.8	0.99	0.98	0.99	0.96	0.98			0.89	1	1	0.73	0.93	0.92	0.59	0.87			0.69	0.83	0.73
43	Xanthosine (Not validated); PlaSMA ID-511 C10H12N4O6---Xanthosine C10H12N4O6---Xanthosine C10H12N4O6 MoNA 439175---Xanthosine; LC-ESI-QTOF; MS2; CE C10H12N4O6	MS2	M-H	151.026	85.57	54.5	69.35	54.28	54.11	93.43			0.63	20.54	29.18	87.8	87.8	87.8	87.8	87.8			85.6	87.8	87.8	0.99	0.98	0.99	0.96	0.98			0.89	1	1	0.86	0.93	0.93	0.95	0.87			0.83	0.98	0.93
43	Xanthosine (Not validated); PlaSMA ID-511 C10H12N4O6---Xanthosine C10H12N4O6---Xanthosine C10H12N4O6 MoNA 439175---Xanthosine; LC-ESI-QTOF; MS2; CE C10H12N4O6	MS2	M-H	108.021	85.57	6.78	6.22	6	2.61	8.97			0.21	3.09	3.18	87.8	87.8	87.8	87.8	87.8			85.6	87.8	87.8	0.99	0.98	0.99	0.96	0.98			0.89	1	1	0.73	0.94	0.92	0.59	0.95			0.69	0.83	0.73
44	OPHTHALMIC ACID C11H19N3O6	MS1	M-H	288.119	69.62	90.67	45.53		39.67	140.87	71.52	95.48	24.06	231.59	116.5	70.1	68.9		70.1	70.1	70.1	70.1	70.1	70.1	68.9	0.99	0.98		0.79	0.98	0.99	0.99	0.58	0.97	0.98	0.87	0.83		0.69	0.83	0.85	0.79	0.59	0.87	0.91
44	OPHTHALMIC ACID C11H19N3O6	MS2	M-H	128.036	69.62	3.98	2.67		1.39	2.08	2.37	2.21	0.87	5.47	3.42	70.1	68.9		70.1	70.1	70.1	70.1	70.1	70.1	68.9	0.99	0.98		0.79	0.98	0.99	0.99	0.58	0.97	0.98	0.85	0.84		0.67	0.83	0.92	0.75	0.82	0.84	0.91
44	OPHTHALMIC ACID C11H19N3O6	MS2	M-H	195.079	69.62	4.99	2.37		4.84	4.99	1.58	1.22	0	9.19	3.13	70.1	68.9		70.1	70.1	70.1	70.1	70.1	70.1	68.9	0.99	0.98		0.79	0.98	0.99	0.99	0.58	0.97	0.98	0.87	0.83		0.73	0.84	0.76	0.76	0	0.87	0.85
44	OPHTHALMIC ACID C11H19N3O6	MS2	M-H	159.079	69.62	4.4	1.17		1.23	3.94	1.81	1.68	0	5.22	3.79	70.1	68.9		70.1	70.1	70.1	70.1	70.1	70.1	68.9	0.99	0.98		0.79	0.98	0.99	0.99	0.58	0.97	0.98	0.81	0.74		0.53	0.78	0.78	0.71	0	0.79	0.76
44	OPHTHALMIC ACID C11H19N3O6	MS2	M-H	226.121	69.62	2	1.61		1.55	3.76	0.77	2.16	0	3.3	2.62	70.1	68.9		70.1	70.1	70.1	70.1	70.1	70.1	68.9	0.99	0.98		0.79	0.98	0.99	0.99	0.58	0.97	0.98	0.61	0.7		0.69	0.79	0.85	0.79	0	0.38	0.85
44	OPHTHALMIC ACID C11H19N3O6	MS2	M-H	115.087	69.62	3.46	0.99		0	1.91	1.05	1.32	0.11	6.84	3.51	70.1	68.9		70.1	70.1	70.1	70.1	70.1	70.1	68.9	0.99	0.98		0.79	0.98	0.99	0.99	0.58	0.97	0.98	0.96	0.64		0	0.72	0.69	0.79	0.59	0.95	0.91
44	OPHTHALMIC ACID C11H19N3O6	MS2	M-H	141.068	69.62	1.59	0.85		0	2.13	1.34	1.22	0	2.38	1.58	70.1	68.9		70.1	70.1	70.1	70.1	70.1	70.1	68.9	0.99	0.98		0.79	0.98	0.99	0.99	0.58	0.97	0.98	0.85	0.67		0	0.73	0.8	0.74	0	0.82	0.65
45	Uridine C9H12N2O6 MoNA 438629	MS1	M+HCOO	289.067	119.97	17.62	17.42	19.66	19.54	30.15	1.11	1.28		4.74	4.07	120	120	120	120	120	120	120		120	120	0.93	0.93	0.96	0.97	0.95	0.84	0.87		0.94	0.91	0.88	0.86	0.92	0.89	0.89	0.79	0.76		0.75	0.74
45	Uridine C9H12N2O6 MoNA 438629	MS2	M+HCOO	243.061	119.97	182.17	103.53	69.45	43.46	117.19	8.96	21.54		31.44	27.84	120	120	120	120	120	120	120		120	120	0.93	0.93	0.96	0.97	0.95	0.84	0.87		0.94	0.91	0.78	0.73	0.92	0.89	0.79	0.65	0.77		0.75	0.68
45	Uridine C9H12N2O6 MoNA 438629	MS2	M+HCOO	110.024	119.97	28.65	27.4	21.01	20.14	36.25	2.26	4.09		5.4	7.22	120	120	120	120	120	120	120		120	120	0.93	0.93	0.96	0.97	0.95	0.84	0.87		0.94	0.91	0.88	0.86	0.93	0.92	0.88	0.82	0.76		0.9	0.67
45	Uridine C9H12N2O6 MoNA 438629	MS2	M+HCOO	200.055	119.97	38.25	37.38	18.85	13.74	37.21	2.61	5.85		11.36	9.6	120	120	120	120	120	120	120		120	120	0.93	0.93	0.96	0.97	0.95	0.84	0.87		0.94	0.91	0.73	0.7	0.68	0.83	0.73	0.71	0.72		0.7	0.71
45	Uridine C9H12N2O6 MoNA 438629	MS2	M+HCOO	152.036	119.97	9.75	5.85	7.95	7.18	9.83	0	1.9		1.76	3.78	120	120	120	120	120	120	120		120	120	0.93	0.93	0.96	0.97	0.95	0.84	0.87		0.94	0.91	0.82	0.82	0.72	0.86	0.89	0	0.25		0.55	0.74
45	Uridine C9H12N2O6 MoNA 438629	MS2	M+HCOO	111.02	119.97	30.28	20.46	25.63	18.47	29.5	7.63	7.04		12.06	6.29	120	120	120	120	120	120	120		120	120	0.93	0.93	0.96	0.97	0.95	0.84	0.87		0.94	0.91	0.91	0.9	0.73	0.79	0.91	0.79	0.25		0.75	0.78
45	Uridine C9H12N2O6 MoNA 438629	MS2	M+HCOO	140.034	119.97	6.42	4.87	4.84	2.61	3.86	0	0		0.91	0.24	120	120	120	120	120	120	120		120	120	0.93	0.93	0.96	0.97	0.95	0.84	0.87		0.94	0.91	0.67	0.77	0.75	0.87	0.66	0	0		0.33	0.51
46	C10-LAS (STANDARD MIX) C16H26O3S	MS1	M-H	297.152	746.75	2094.42	2098.16	2062.6	2140.49	2080.24	2170.14	2170.08	2069.24	2328.98	2777.38	746	746	746	746	746	746	746	746	746	746	0.98	0.98	0.98	0.99	0.99	0.99	0.98	0.99	0.99	0.98	0.94	0.96	0.95	0.97	0.98	0.96	0.95	0.96	0.96	0.98
46	C10-LAS (STANDARD MIX) C16H26O3S	MS2	M-H	297.153	746.75	1275.22	1466.68	1080.52	1249.49	1260.38	1259.08	1090.6	1293.73	1504.44	1476.3	746	746	746	746	746	746	746	746	746	746	0.98	0.98	0.98	0.99	0.99	0.99	0.98	0.99	0.99	0.98	0.94	0.96	0.99	0.98	0.98	0.96	0.95	0.98	0.99	0.98
46	C10-LAS (STANDARD MIX) C16H26O3S	MS2	M-H	183.012	746.75	485.06	467.87	435.91	514.76	487.26	544.59	458.03	514.18	612.83	652.8	746	746	746	746	746	746	746	746	746	746	0.98	0.98	0.98	0.99	0.99	0.99	0.98	0.99	0.99	0.98	0.95	0.96	0.95	0.97	0.98	0.96	0.96	0.96	0.96	0.98
46	C10-LAS (STANDARD MIX) C16H26O3S	MS2	M-H	119.05	746.75	7.51	5.69	6.6	9.01	8.07	10.8	8.26	7.52	10.96	9.85	746	746	746	746	746	746	746	746	746	746	0.98	0.98	0.98	0.99	0.99	0.99	0.98	0.99	0.99	0.98	0.85	0.79	0.8	0.93	0.91	0.92	0.76	0.77	0.9	0.89
46	C10-LAS (STANDARD MIX) C16H26O3S	MS2	M-H	184.02	746.75	92.93	106.75	93.71	106.25	107.26	103.28	90.87	97.45	122.57	141.62	746	746	746	746	746	746	746	746	746	746	0.98	0.98	0.98	0.99	0.99	0.99	0.98	0.99	0.99	0.98	0.91	0.83	0.81	0.87	0.88	0.85	0.91	0.9	0.9	0.87
46	C10-LAS (STANDARD MIX) C16H26O3S	MS2	M-H	170.005	746.75	8.38	6.07	9.2	9.5	11.9	9.65	9.2	10.18	9.96	11.63	746	746	746	746	746	746	746	746	746	746	0.98	0.98	0.98	0.99	0.99	0.99	0.98	0.99	0.99	0.98	0.76	0.86	0.86	0.88	0.85	0.85	0.88	0.92	0.84	0.89
46	C10-LAS (STANDARD MIX) C16H26O3S	MS2	M-H	197.028	746.75	14.92	23.02	17.55	18.91	20.67	24.14	17.84	17.65	26.32	20.44	746	746	746	746	746	746	746	746	746	746	0.98	0.98	0.98	0.99	0.99	0.99	0.98	0.99	0.99	0.98	0.68	0.63	0.47	0.78	0.7	0.74	0.67	0.74	0.75	0.66
47	D-(-)-Ribose [M-H]- C5H10O5 NIST 1076658---D-Lyxose [M-H]- C5H10O5 NIST 1076627	MS1	2M-H	299.097	66.48	92.62	237.57		61.23	110.08					5.95	66.7	67.8		66.7	66.7					66.5	0.83	0.74		0.74	0.77					0.63	0.61	0.77		0.64	0.83					0.61
47	D-(-)-Ribose [M-H]- C5H10O5 NIST 1076658---D-Lyxose [M-H]- C5H10O5 NIST 1076627	MS2	2M-H	113.027	66.48	6.81	11.63		4.15	4.37					6.29	66.7	67.8		66.7	66.7					66.5	0.83	0.74		0.74	0.77					0.63	0.61	0.77		0.54	0.83					0.61
47	D-(-)-Ribose [M-H]- C5H10O5 NIST 1076658---D-Lyxose [M-H]- C5H10O5 NIST 1076627	MS2	2M-H	89.0238	66.48	16.01	21.23		9.02	11.9					0	66.7	67.8		66.7	66.7					66.5	0.83	0.74		0.74	0.77					0.63	0.23	0.23		0.34	0.42					0
47	D-(-)-Ribose [M-H]- C5H10O5 NIST 1076658---D-Lyxose [M-H]- C5H10O5 NIST 1076627	MS2	2M-H	179.062	66.48	4.64	3.97		3.68	8.79					0	66.7	67.8		66.7	66.7					66.5	0.83	0.74		0.74	0.77					0.63	0.21	0.72		0.35	0.58					0
47	D-(-)-Ribose [M-H]- C5H10O5 NIST 1076658---D-Lyxose [M-H]- C5H10O5 NIST 1076627	MS2	2M-H	59.0143	66.48	8.17	16.24		4.08	8.51					0	66.7	67.8		66.7	66.7					66.5	0.83	0.74		0.74	0.77					0.63	0.49	0.71		0.64	0.84					0
47	D-(-)-Ribose [M-H]- C5H10O5 NIST 1076658---D-Lyxose [M-H]- C5H10O5 NIST 1076627	MS2	2M-H	119.036	66.48	20.75	23.36		10.29	23.26					8.78	66.7	67.8		66.7	66.7					66.5	0.83	0.74		0.74	0.77					0.63	0.2	0.31		0.21	0.47					0.76
47	D-(-)-Ribose [M-H]- C5H10O5 NIST 1076658---D-Lyxose [M-H]- C5H10O5 NIST 1076627	MS2	2M-H	253.092	66.48	20.49	118.05		44.22	58.61					0	66.7	67.8		66.7	66.7					66.5	0.83	0.74		0.74	0.77					0.63	0.85	0.96		0.77	0.81					0
48	N-Acetyl-D-glucosamine 6-phosphate [2M-H]- C8H16NO9P NIST 1173395---N-Acetyl-D-glucosamine 6-phosphate [2M-H]- C8H16NO9P NIST 1173396	MS1	M-H	300.047	56.54	60.33	65.35	81.64	61.28	82.99	25.1	22.23	13.13	58.53	30.68	56.7	56.7	56.7	55.6	56.7	56.5	56.5	56.5	56.7	56.7	0.98	0.98	0.93	0.9	0.96	0.72	0.94	0.69	0.91	0.89	0.83	0.9	0.69	0.65	0.83	0.81	0.85	0.95	0.96	0.92
48	N-Acetyl-D-glucosamine 6-phosphate [2M-H]- C8H16NO9P NIST 1173395---N-Acetyl-D-glucosamine 6-phosphate [2M-H]- C8H16NO9P NIST 1173396	MS2	M-H	300.047	56.54	6.96	7.79	6.88	5.59	5.67	0	1.96	0	3.89	2.13	56.7	56.7	56.7	55.6	56.7	56.5	56.5	56.5	56.7	56.7	0.98	0.98	0.93	0.9	0.96	0.72	0.94	0.69	0.91	0.89	0.83	0.9	0.64	0.65	0.89	0	0.43	0	0.71	0.65
48	N-Acetyl-D-glucosamine 6-phosphate [2M-H]- C8H16NO9P NIST 1173395---N-Acetyl-D-glucosamine 6-phosphate [2M-H]- C8H16NO9P NIST 1173396	MS2	M-H	78.9599	56.54	14.31	26.76	17.96	10.34	21.25	15.32	13.95	16.47	47.75	18.45	56.7	56.7	56.7	55.6	56.7	56.5	56.5	56.5	56.7	56.7	0.98	0.98	0.93	0.9	0.96	0.72	0.94	0.69	0.91	0.89	0.74	0.86	0.69	0.65	0.7	0.93	0.92	0.95	0.96	0.92
48	N-Acetyl-D-glucosamine 6-phosphate [2M-H]- C8H16NO9P NIST 1173395---N-Acetyl-D-glucosamine 6-phosphate [2M-H]- C8H16NO9P NIST 1173396	MS2	M-H	96.968	56.54	10.02	11.34	12.52	12.63	15.75	7.92	5.58	19.76	19.36	14.74	56.7	56.7	56.7	55.6	56.7	56.5	56.5	56.5	56.7	56.7	0.98	0.98	0.93	0.9	0.96	0.72	0.94	0.69	0.91	0.89	0.88	0.94	0.97	0.92	0.83	0.81	0.85	0.96	0.99	0.92
49	Epigallocatechin C15H14O7	MS1	M-H	305.068	57.96	354.96	263.15	261.03	446.32	628.5			68.5			57.9	57.8	57.9	57.8	57.8			57.9			0.83	0.6	0.69	0.66	0.69			0.55			0.87	0.84	0.89	0.92	0.96			0.82
49	Epigallocatechin C15H14O7	MS2	M-H	128.035	57.96	88.05	88.04	55.61	108.7	107.32			32.97			57.9	57.8	57.9	57.8	57.8			57.9			0.83	0.6	0.69	0.66	0.69			0.55			0.73	0.48	0.54	0.49	0.74			0.45
49	Epigallocatechin C15H14O7	MS2	M-H	143.046	57.96	44.63	19.45	19.17	34.14	53.41			13.31			57.9	57.8	57.9	57.8	57.8			57.9			0.83	0.6	0.69	0.66	0.69			0.55			0.87	0.9	0.86	0.95	0.98			0.33
49	Epigallocatechin C15H14O7	MS2	M-H	272.087	57.96	47.23	12.12	12.32	15.48	28.21			3.46			57.9	57.8	57.9	57.8	57.8			57.9			0.83	0.6	0.69	0.66	0.69			0.55			0.71	0.63	0.95	0.92	0.96			0.88
49	Epigallocatechin C15H14O7	MS2	M-H	124.007	57.96	439.7	390.63	383.26	483.55	576.7			309.24			57.9	57.8	57.9	57.8	57.8			57.9			0.83	0.6	0.69	0.66	0.69			0.55			0.89	0.83	0.89	0.87	0.83			0.82
49	Epigallocatechin C15H14O7	MS2	M-H	179.046	57.96	15.41	6.59	4.31	8.19	16.07			2.43			57.9	57.8	57.9	57.8	57.8			57.9			0.83	0.6	0.69	0.66	0.69			0.55			0.76	0.84	0.78	0.92	0.86			0.35
49	Epigallocatechin C15H14O7	MS2	M-H	210.089	57.96	18.04	5.71	6.81	6.74	13.5			3.22			57.9	57.8	57.9	57.8	57.8			57.9			0.83	0.6	0.69	0.66	0.69			0.55			0.86	0.71	0.67	0.91	0.94			0.47
50	GLUTATHIONE C10H17N3O6S---Glutathione (reduced) C10H17N3O6S---Glutathione C10H17N3O6S MassBank 2955	MS1	M-H	306.076	64.48	183.11	142.72	135.3	193.11	359.95	3125.9	2696.31	784.13	16262.5	6046.41	57.9	59	57.9	57.8	59	64.5	64.5	64.5	64.5	64.5	0.98	0.91	0.86	0.94	0.96	0.98	0.96	0.96	0.96	0.97	0.8	0.92	0.91	0.93	0.95	0.89	0.9	0.94	0.97	0.85
50	GLUTATHIONE C10H17N3O6S---Glutathione (reduced) C10H17N3O6S---Glutathione C10H17N3O6S MassBank 2955	MS2	M-H	143.046	64.48	44.63	19.88	19.6	34.14	57.47	311.61	301.35	66.56	1103.52	461.08	57.9	59	57.9	57.8	59	64.5	64.5	64.5	64.5	64.5	0.98	0.91	0.86	0.94	0.96	0.98	0.96	0.96	0.96	0.97	0.88	0.92	0.91	0.96	0.95	0.92	0.92	0.9	0.98	0.85
50	GLUTATHIONE C10H17N3O6S---Glutathione (reduced) C10H17N3O6S---Glutathione C10H17N3O6S MassBank 2955	MS2	M-H	272.092	64.48	47.23	12.63	12.32	15.48	31.07	139.04	96.06	11.25	511.52	137.25	57.9	59	57.9	57.8	59	64.5	64.5	64.5	64.5	64.5	0.98	0.91	0.86	0.94	0.96	0.98	0.96	0.96	0.96	0.97	0.73	0.67	0.95	0.93	0.95	0.8	0.66	0.94	0.95	0.82
50	GLUTATHIONE C10H17N3O6S---Glutathione (reduced) C10H17N3O6S---Glutathione C10H17N3O6S MassBank 2955	MS2	M-H	306.074	64.48	12.81	7.69	0	8.5	21.11	343.92	242.08	31.85	1177.44	363.05	57.9	59	57.9	57.8	59	64.5	64.5	64.5	64.5	64.5	0.98	0.91	0.86	0.94	0.96	0.98	0.96	0.96	0.96	0.97	0.71	0.92	0	0.92	0.78	0.85	0.74	0.99	0.95	0.87
50	GLUTATHIONE C10H17N3O6S---Glutathione (reduced) C10H17N3O6S---Glutathione C10H17N3O6S MassBank 2955	MS2	M-H	128.038	64.48	89.67	93.92	59.18	108.7	117.64	282.83	230.08	63.97	755.81	373.14	57.9	59	57.9	57.8	59	64.5	64.5	64.5	64.5	64.5	0.98	0.91	0.86	0.94	0.96	0.98	0.96	0.96	0.96	0.97	0.8	0.56	0.62	0.53	0.8	0.89	0.9	0.86	0.97	0.81
50	ISF of GLUTATHIONE C10H17N3O6S---Glutathione (reduced) C10H17N3O6S---Glutathione C10H17N3O6S MassBank 2955	MS1	-	272.088	64.7	78.03	59.41	63.19	98.12	138.07				900.76		57.9	57.8	57.9	57.8	57.8				64.5		0.94	0.9	0.91	0.91	0.93				0.99		0.64	0.5	0.73	0.79	0.69				0.83
50	ISF of GLUTATHIONE C10H17N3O6S---Glutathione (reduced) C10H17N3O6S---Glutathione C10H17N3O6S MassBank 2955	MS2	-	143.045	64.7	1.35	1.77	1.04	2.45	2.26				9.36		57.9	57.8	57.9	57.8	57.8				64.5		0.94	0.9	0.91	0.91	0.93				0.99		0.54	0.5	0.77	0.79	0.69				0.88
50	ISF of GLUTATHIONE C10H17N3O6S---Glutathione (reduced) C10H17N3O6S---Glutathione C10H17N3O6S MassBank 2955	MS2	-	128.035	64.7	6.22	6.31	10.38	8.08	10.83				11.6		57.9	57.8	57.9	57.8	57.8				64.5		0.94	0.9	0.91	0.91	0.93				0.99		0.9	0.93	0.73	0.87	0.76				0.75
50	ISF of GLUTATHIONE C10H17N3O6S---Glutathione (reduced) C10H17N3O6S---Glutathione C10H17N3O6S MassBank 2955	MS2	-	179.047	64.7	0.14	2.38	0.62	0	0				2.26		57.9	57.8	57.9	57.8	57.8				64.5		0.94	0.9	0.91	0.91	0.93				0.99		0.64	0.41	0.5	0	0				0.73
50	ISF of GLUTATHIONE C10H17N3O6S---Glutathione (reduced) C10H17N3O6S---Glutathione C10H17N3O6S MassBank 2955	MS2	-	58.0286	64.7	0	0	0	0.31	0.39				1.02		57.9	57.8	57.9	57.8	57.8				64.5		0.94	0.9	0.91	0.91	0.93				0.99		0	0	0	0.41	0.36				0.83
51	C12-AE1S (TENTATIVE) C14H30O5S	MS1	M-H	309.173	762.6	103	102.6	92.35	108.9	102.16	101.22	109.61	96.82	119.07	102.14	762.7	762.7	762.7	762.7	762.7	762.7	762.7	762.7	762.7	762.7	0.97	0.97	0.97	0.94	0.97	0.97	0.98	0.97	0.97	0.97	0.88	0.95	0.9	0.89	0.93	0.93	0.83	0.89	0.92	0.94
51	C12-AE1S (TENTATIVE) C14H30O5S	MS2	M-H	309.173	762.6	37.92	38.53	38.46	44.92	47.09	44.97	49.46	48.14	52.86	46.58	762.7	762.7	762.7	762.7	762.7	762.7	762.7	762.7	762.7	762.7	0.97	0.97	0.97	0.94	0.97	0.97	0.98	0.97	0.97	0.97	0.88	0.98	0.96	0.96	0.93	0.96	0.85	0.92	0.98	0.98
51	C12-AE1S (TENTATIVE) C14H30O5S	MS2	M-H	96.9603	762.6	6.11	8.28	6.46	14.26	6.83	6.29	5.57	5.12	7.62	7.93	762.7	762.7	762.7	762.7	762.7	762.7	762.7	762.7	762.7	762.7	0.97	0.97	0.97	0.94	0.97	0.97	0.98	0.97	0.97	0.97	0.88	0.95	0.9	0.89	0.97	0.93	0.83	0.89	0.92	0.94
51	C12-AE1S (TENTATIVE) C14H30O5S	MS2	M-H	308.973	762.6	0	0	0	0	0	0.72	0.18	0	0	0	762.7	762.7	762.7	762.7	762.7	762.7	762.7	762.7	762.7	762.7	0.97	0.97	0.97	0.94	0.97	0.97	0.98	0.97	0.97	0.97	0	0	0	0	0	0.58	0.54	0	0	0
51	C12-AE1S (TENTATIVE) C14H30O5S	MS2	M-H	172.954	762.6	0	0	0	0	0	0	0	0	0	0	762.7	762.7	762.7	762.7	762.7	762.7	762.7	762.7	762.7	762.7	0.97	0.97	0.97	0.94	0.97	0.97	0.98	0.97	0.97	0.97	0	0	0	0	0	0	0	0	0	0
51	C12-AE1S (TENTATIVE) C14H30O5S	MS2	M-H	309.148	762.6	0	0	0	0	0	0	0.72	0	0	0	762.7	762.7	762.7	762.7	762.7	762.7	762.7	762.7	762.7	762.7	0.97	0.97	0.97	0.94	0.97	0.97	0.98	0.97	0.97	0.97	0	0	0	0	0	0	0.32	0	0	0
51	C12-AE1S (TENTATIVE) C14H30O5S	MS2	M-H	79.9591	762.6	2.25	0	0	1.28	1.93	0	0	0	1.06	1.24	762.7	762.7	762.7	762.7	762.7	762.7	762.7	762.7	762.7	762.7	0.97	0.97	0.97	0.94	0.97	0.97	0.98	0.97	0.97	0.97	0.46	0	0	0.72	0.47	0	0	0	0.6	0.44
52	C11-LAS (STANDARD MIX) C17H28O3S	MS1	M-H	311.168	767.82	2560.85	2554.5	2373.51	2522.53	2438.15	2636.66	2758.01	2352.72	2580.04	4216.31	767.1	767.1	767.1	767.1	767.1	767.1	767.1	767.1	767.1	767.1	0.99	0.99	0.98	0.99	0.99	0.99	0.97	0.99	0.99	0.97	0.97	0.95	0.97	0.89	0.94	0.97	0.87	0.93	0.97	0.93
52	C11-LAS (STANDARD MIX) C17H28O3S	MS2	M-H	311.168	767.82	1670.35	1802.73	1759.76	1831.6	1677.57	1837.55	3139.64	1616.05	1766.4	3014.18	767.1	767.1	767.1	767.1	767.1	767.1	767.1	767.1	767.1	767.1	0.99	0.99	0.98	0.99	0.99	0.99	0.97	0.99	0.99	0.97	0.98	0.98	0.97	0.92	0.99	0.99	0.86	0.93	0.99	0.98
52	C11-LAS (STANDARD MIX) C17H28O3S	MS2	M-H	183.012	767.82	507.64	512.02	450.74	521.21	570.77	551.28	669.05	448.46	551.92	854.78	767.1	767.1	767.1	767.1	767.1	767.1	767.1	767.1	767.1	767.1	0.99	0.99	0.98	0.99	0.99	0.99	0.97	0.99	0.99	0.97	0.97	0.93	0.98	0.89	0.94	0.97	0.81	0.99	0.97	0.92
52	C11-LAS (STANDARD MIX) C17H28O3S	MS2	M-H	119.05	767.82	5.97	5.2	4.86	3.12	4.9	6.81	6.2	3.18	5.36	6.7	767.1	767.1	767.1	767.1	767.1	767.1	767.1	767.1	767.1	767.1	0.99	0.99	0.98	0.99	0.99	0.99	0.97	0.99	0.99	0.97	0.83	0.77	0.79	0.59	0.79	0.81	0.88	0.58	0.85	0.85
52	C11-LAS (STANDARD MIX) C17H28O3S	MS2	M-H	197.026	767.82	18.16	11.8	14.92	20.41	20.18	17.52	20.97	18.14	14.15	25.53	767.1	767.1	767.1	767.1	767.1	767.1	767.1	767.1	767.1	767.1	0.99	0.99	0.98	0.99	0.99	0.99	0.97	0.99	0.99	0.97	0.73	0.8	0.84	0.54	0.76	0.6	0.6	0.57	0.77	0.8
52	C11-LAS (STANDARD MIX) C17H28O3S	MS2	M-H	184.019	767.82	103.86	97.03	90.82	92.05	112.36	113.52	126.39	94.78	99.62	174.28	767.1	767.1	767.1	767.1	767.1	767.1	767.1	767.1	767.1	767.1	0.99	0.99	0.98	0.99	0.99	0.99	0.97	0.99	0.99	0.97	0.89	0.95	0.87	0.82	0.9	0.93	0.66	0.83	0.92	0.93
52	C11-LAS (STANDARD MIX) C17H28O3S	MS2	M-H	170.005	767.82	13.52	12.75	12.59	15.1	14.12	14.17	15.17	12.73	14.38	18.44	767.1	767.1	767.1	767.1	767.1	767.1	767.1	767.1	767.1	767.1	0.99	0.99	0.98	0.99	0.99	0.99	0.97	0.99	0.99	0.97	0.84	0.85	0.84	0.75	0.89	0.86	0.87	0.83	0.88	0.89
53	Adenosine C10H13N5O4---Adenosine C10H13N5O4 MoNA 436594---Adenosine C10H13N5O4 MoNA 436595	MS1	M+HCOO	312.094	291.88	39.8		40.88	42.91	61.27			35.17	43.22		290.9		292	292	292			292.1	292		1		0.98	0.95	0.99			0.98	0.99		0.73		0.55	0.79	0.84			0.78	0.73
53	Adenosine C10H13N5O4---Adenosine C10H13N5O4 MoNA 436594---Adenosine C10H13N5O4 MoNA 436595	MS2	M+HCOO	134.047	291.88	42.57		29.14	38.17	83.62			24.33	38.64		290.9		292	292	292			292.1	292		1		0.98	0.95	0.99			0.98	0.99		0.73		0.93	0.99	0.84			0.89	0.84
53	Adenosine C10H13N5O4---Adenosine C10H13N5O4 MoNA 436594---Adenosine C10H13N5O4 MoNA 436595	MS2	M+HCOO	266.086	291.88	1.25		1.17	5.06	5.57			3.26	2.59		290.9		292	292	292			292.1	292		1		0.98	0.95	0.99			0.98	0.99		0.69		0.55	0.79	0.65			0.78	0.73
53	Adenosine C10H13N5O4---Adenosine C10H13N5O4 MoNA 436594---Adenosine C10H13N5O4 MoNA 436595	MS2	M+HCOO	107.036	291.88	0.74		0	0.11	1.11			0.32	0.32		290.9		292	292	292			292.1	292		1		0.98	0.95	0.99			0.98	0.99		0.82		0	0.55	0.87			0.57	0.58
53	Adenosine C10H13N5O4---Adenosine C10H13N5O4 MoNA 436594---Adenosine C10H13N5O4 MoNA 436595	MS2	M+HCOO	133.636	291.88	0		0	0	0			0	0		290.9		292	292	292			292.1	292		1		0.98	0.95	0.99			0.98	0.99		0		0	0	0			0	0
54	URIDINE-5-MONOPHOSPHATE C9H13N2O9P---Uridine 5'-monophosphate C9H13N2O9P MassBank 3927---Uridine 5'-monophosphate [2M-H]- C9H13N2O9P NIST 1173759---Uridine 5'-monophosphate [2M-H]- C9H13N2O9P NIST 1173760---Uridine 5'-monophosphate [M-H]- C9H13N2O9P NIST 1173793	MS1	M-H	323.028	59.67	503.84	517.09	587.34	670.7	936	500.03	440.63	139.76	1340.39	846.62	60.1	60.1	60.1	60.1	60.1	60.1	60.1	60.1	60.1	60.1	0.98	0.98	0.98	0.93	0.97	0.98	0.99	0.95	0.97	0.98	0.95	0.91	0.95	0.94	0.95	0.84	0.91	0.84	0.94	0.85
54	URIDINE-5-MONOPHOSPHATE C9H13N2O9P---Uridine 5'-monophosphate C9H13N2O9P MassBank 3927---Uridine 5'-monophosphate [2M-H]- C9H13N2O9P NIST 1173759---Uridine 5'-monophosphate [2M-H]- C9H13N2O9P NIST 1173760---Uridine 5'-monophosphate [M-H]- C9H13N2O9P NIST 1173793	MS2	M-H	78.9589	59.67	38.54	46.83	41.51	61.77	84.52	34.26	49.57	17.08	157.72	88.51	60.1	60.1	60.1	60.1	60.1	60.1	60.1	60.1	60.1	60.1	0.98	0.98	0.98	0.93	0.97	0.98	0.99	0.95	0.97	0.98	0.87	0.84	0.93	0.91	0.9	0.84	0.65	0.84	0.85	0.72
54	URIDINE-5-MONOPHOSPHATE C9H13N2O9P---Uridine 5'-monophosphate C9H13N2O9P MassBank 3927---Uridine 5'-monophosphate [2M-H]- C9H13N2O9P NIST 1173759---Uridine 5'-monophosphate [2M-H]- C9H13N2O9P NIST 1173760---Uridine 5'-monophosphate [M-H]- C9H13N2O9P NIST 1173793	MS2	M-H	323.028	59.67	56.38	50.08	76.19	131.82	112.88	60.42	43.05	17.55	188.46	98.31	60.1	60.1	60.1	60.1	60.1	60.1	60.1	60.1	60.1	60.1	0.98	0.98	0.98	0.93	0.97	0.98	0.99	0.95	0.97	0.98	0.95	0.91	0.89	0.87	0.95	0.79	0.93	0.95	0.93	0.97
54	URIDINE-5-MONOPHOSPHATE C9H13N2O9P---Uridine 5'-monophosphate C9H13N2O9P MassBank 3927---Uridine 5'-monophosphate [2M-H]- C9H13N2O9P NIST 1173759---Uridine 5'-monophosphate [2M-H]- C9H13N2O9P NIST 1173760---Uridine 5'-monophosphate [M-H]- C9H13N2O9P NIST 1173793	MS2	M-H	96.9691	59.67	35.79	32.99	33.4	53.68	68.85	24.58	30.89	21.37	94.52	75.96	60.1	60.1	60.1	60.1	60.1	60.1	60.1	60.1	60.1	60.1	0.98	0.98	0.98	0.93	0.97	0.98	0.99	0.95	0.97	0.98	0.8	0.82	0.9	0.95	0.88	0.83	0.78	0.8	0.87	0.59
54	URIDINE-5-MONOPHOSPHATE C9H13N2O9P---Uridine 5'-monophosphate C9H13N2O9P MassBank 3927---Uridine 5'-monophosphate [2M-H]- C9H13N2O9P NIST 1173759---Uridine 5'-monophosphate [2M-H]- C9H13N2O9P NIST 1173760---Uridine 5'-monophosphate [M-H]- C9H13N2O9P NIST 1173793	MS2	M-H	111.02	59.67	13.51	15.33	11.83	12.89	16.18	8.75	9.88	2.04	23.79	18.24	60.1	60.1	60.1	60.1	60.1	60.1	60.1	60.1	60.1	60.1	0.98	0.98	0.98	0.93	0.97	0.98	0.99	0.95	0.97	0.98	0.98	0.92	0.89	0.83	0.97	0.88	0.91	0.7	0.96	0.85
54	URIDINE-5-MONOPHOSPHATE C9H13N2O9P---Uridine 5'-monophosphate C9H13N2O9P MassBank 3927---Uridine 5'-monophosphate [2M-H]- C9H13N2O9P NIST 1173759---Uridine 5'-monophosphate [2M-H]- C9H13N2O9P NIST 1173760---Uridine 5'-monophosphate [M-H]- C9H13N2O9P NIST 1173793	MS2	M-H	211.001	59.67	9.83	7.06	12.64	21.71	21	9.86	8.15	1.34	35.8	22.64	60.1	60.1	60.1	60.1	60.1	60.1	60.1	60.1	60.1	60.1	0.98	0.98	0.98	0.93	0.97	0.98	0.99	0.95	0.97	0.98	0.89	0.59	0.95	0.84	0.79	0.72	0.81	0.44	0.87	0.83
54	URIDINE-5-MONOPHOSPHATE C9H13N2O9P---Uridine 5'-monophosphate C9H13N2O9P MassBank 3927---Uridine 5'-monophosphate [2M-H]- C9H13N2O9P NIST 1173759---Uridine 5'-monophosphate [2M-H]- C9H13N2O9P NIST 1173760---Uridine 5'-monophosphate [M-H]- C9H13N2O9P NIST 1173793	MS2	M-H	280.023	59.67	5.06	3.44	11.2	12.38	9.17	5.75	2.06	0	18.8	13.32	60.1	60.1	60.1	60.1	60.1	60.1	60.1	60.1	60.1	60.1	0.98	0.98	0.98	0.93	0.97	0.98	0.99	0.95	0.97	0.98	0.81	0.77	0.96	0.94	0.91	0.77	0.53	0	0.94	0.85
55	4-Dodecylbenzenesulfonic Acid C18H30O3S MoNA 440645	MS1	M-H	325.183	779.09	2187.04	2139.15	2079.46	2161.03	2049.38	2257.69	2378.11	2037.66	2115.1	3204.4	786	786	786	786	786	786	786	786	786	786	0.97	0.98	0.99	0.99	0.98	0.98	0.99	0.99	0.97	0.99	0.97	0.97	0.93	0.97	0.92	0.94	0.93	0.98	0.9	0.96
55	4-Dodecylbenzenesulfonic Acid C18H30O3S MoNA 440645	MS2	M-H	325.185	779.09	1953.54	1895.56	2032.2	1714.49	1704.09	1710.44	1846.3	1599.1	2323.5	2451.03	786	786	786	786	786	786	786	786	786	786	0.97	0.98	0.99	0.99	0.98	0.98	0.99	0.99	0.97	0.99	0.97	0.99	0.93	0.99	0.92	0.99	0.96	0.99	0.9	0.99
55	4-Dodecylbenzenesulfonic Acid C18H30O3S MoNA 440645	MS2	M-H	183.012	779.09	325.26	329.73	328.63	326.73	271.74	332.57	371.13	320.7	309.48	494.95	786	786	786	786	786	786	786	786	786	786	0.97	0.98	0.99	0.99	0.98	0.98	0.99	0.99	0.97	0.99	0.98	0.97	0.94	0.97	0.96	0.94	0.93	0.98	0.95	0.96
55	4-Dodecylbenzenesulfonic Acid C18H30O3S MoNA 440645	MS2	M-H	197.027	779.09	15.07	13.37	12.77	16.03	11.58	18.11	16	15.13	14.53	17.99	786	786	786	786	786	786	786	786	786	786	0.97	0.98	0.99	0.99	0.98	0.98	0.99	0.99	0.97	0.99	0.48	0.61	0.77	0.65	0.73	0.73	0.82	0.68	0.77	0.7
55	4-Dodecylbenzenesulfonic Acid C18H30O3S MoNA 440645	MS2	M-H	184.022	779.09	59.82	59.57	69.03	68.03	56.17	65.61	67.6	61.1	56.34	97.59	786	786	786	786	786	786	786	786	786	786	0.97	0.98	0.99	0.99	0.98	0.98	0.99	0.99	0.97	0.99	0.96	0.89	0.83	0.9	0.88	0.89	0.9	0.82	0.89	0.89
55	4-Dodecylbenzenesulfonic Acid C18H30O3S MoNA 440645	MS2	M-H	258.983	779.09	0	0	0	0	0	0	0	0	0	0	786	786	786	786	786	786	786	786	786	786	0.97	0.98	0.99	0.99	0.98	0.98	0.99	0.99	0.97	0.99	0	0	0	0	0	0	0	0	0	0
55	Dodecylbenzenesulfonic acid C18H30O3S	MS1	M-H	325.183	786.16	2187.04	2139.15	2079.46	2161.03	2049.38	2257.69	2378.11	2037.66	2115.1	3204.4	786	786	786	786	786	786	786	786	786	786	0.94	0.97	0.97	0.97	0.96	0.97	0.96	0.97	0.93	0.97	0.97	0.97	0.93	0.97	0.92	0.95	0.93	0.98	0.9	0.96
55	Dodecylbenzenesulfonic acid C18H30O3S	MS2	M-H	325.183	786.16	1953.54	1895.56	2032.2	1714.49	1704.09	1710.44	1846.3	1599.1	2323.5	2451.03	786	786	786	786	786	786	786	786	786	786	0.94	0.97	0.97	0.97	0.96	0.97	0.96	0.97	0.93	0.97	0.97	0.99	0.93	0.99	0.92	0.99	0.96	0.99	0.9	0.99
55	Dodecylbenzenesulfonic acid C18H30O3S	MS2	M-H	183.012	786.16	325.26	329.73	328.63	326.73	271.74	332.57	371.13	320.7	309.48	494.95	786	786	786	786	786	786	786	786	786	786	0.94	0.97	0.97	0.97	0.96	0.97	0.96	0.97	0.93	0.97	0.98	0.97	0.94	0.97	0.96	0.94	0.93	0.98	0.95	0.96
55	Dodecylbenzenesulfonic acid C18H30O3S	MS2	M-H	119.05	786.16	2.97	2.3	3.81	2.18	2.52	4.25	2.24	4.2	2.69	1.84	786	786	786	786	786	786	786	786	786	786	0.94	0.97	0.97	0.97	0.96	0.97	0.96	0.97	0.93	0.97	0.61	0.67	0.89	0.79	0.55	0.8	0.53	0.69	0.74	0.7
55	Dodecylbenzenesulfonic acid C18H30O3S	MS2	M-H	170.004	786.16	11.6	7.94	8.87	12.05	10.61	12	12.43	8.61	9.81	13.3	786	786	786	786	786	786	786	786	786	786	0.94	0.97	0.97	0.97	0.96	0.97	0.96	0.97	0.93	0.97	0.74	0.89	0.83	0.89	0.9	0.95	0.83	0.81	0.88	0.89
55	Dodecylbenzenesulfonic acid C18H30O3S	MS2	M-H	184.019	786.16	59.82	60.95	69.03	68.03	56.17	65.61	67.6	61.1	56.34	97.59	786	786	786	786	786	786	786	786	786	786	0.94	0.97	0.97	0.97	0.96	0.97	0.96	0.97	0.93	0.97	0.96	0.89	0.83	0.9	0.88	0.89	0.9	0.82	0.89	0.89
55	Dodecylbenzenesulfonic acid C18H30O3S	MS2	M-H	197.029	786.16	15.07	13.37	13.78	16.03	11.58	18.11	16.06	16.43	14.53	17.99	786	786	786	786	786	786	786	786	786	786	0.94	0.97	0.97	0.97	0.96	0.97	0.96	0.97	0.93	0.97	0.48	0.61	0.86	0.65	0.73	0.73	0.82	0.69	0.77	0.7
56	FA 18:1+3O; PlaSMA ID-735 C18H34O5---FA 18:1+3O; PlaSMA ID-738 C18H34O5	MS1	M-H	329.232	620.32	47.47	380.5	82.45	51.33	181.96				8.19	7.85	620.3	621.7	621.7	620.3	621.7				620.3	620.3	0.92	0.99	0.94	0.88	0.98				0.52	0.58	0.79	0.86	0.82	0.71	0.8				0.61	0.52
56	FA 18:1+3O; PlaSMA ID-735 C18H34O5---FA 18:1+3O; PlaSMA ID-738 C18H34O5	MS2	M-H	329.232	620.32	13.92	100.96	24.01	20.42	50.06				2.98	3.17	620.3	621.7	621.7	620.3	621.7				620.3	620.3	0.92	0.99	0.94	0.88	0.98				0.52	0.58	0.8	0.9	0.84	0.84	0.95				0.61	0.54
56	FA 18:1+3O; PlaSMA ID-735 C18H34O5---FA 18:1+3O; PlaSMA ID-738 C18H34O5	MS2	M-H	171.103	620.32	3.08	19.42	8.25	3.96	12.05				0	0	620.3	621.7	621.7	620.3	621.7				620.3	620.3	0.92	0.99	0.94	0.88	0.98				0.52	0.58	0.39	0.86	0.82	0.57	0.8				0	0
56	FA 18:1+3O; PlaSMA ID-735 C18H34O5---FA 18:1+3O; PlaSMA ID-738 C18H34O5	MS2	M-H	211.134	620.32	0.3	15.72	3.65	1.19	9.13				0	0	620.3	621.7	621.7	620.3	621.7				620.3	620.3	0.92	0.99	0.94	0.88	0.98				0.52	0.58	0.27	0.84	0.67	0.61	0.78				0	0
56	FA 18:1+3O; PlaSMA ID-735 C18H34O5---FA 18:1+3O; PlaSMA ID-738 C18H34O5	MS2	M-H	139.113	620.32	0.48	7.42	0.85	0	4.66				0	0	620.3	621.7	621.7	620.3	621.7				620.3	620.3	0.92	0.99	0.94	0.88	0.98				0.52	0.58	0.46	0.77	0.41	0	0.54				0	0
56	FA 18:1+3O; PlaSMA ID-735 C18H34O5---FA 18:1+3O; PlaSMA ID-738 C18H34O5	MS2	M-H	229.145	620.32	1.56	10.51	2.56	0	4.35				0	0	620.3	621.7	621.7	620.3	621.7				620.3	620.3	0.92	0.99	0.94	0.88	0.98				0.52	0.58	0.49	0.78	0.52	0	0.48				0	0
56	FA 18:1+3O; PlaSMA ID-735 C18H34O5---FA 18:1+3O; PlaSMA ID-738 C18H34O5	MS2	M-H	283.265	620.32	26.82	29.33	26.01	22.71	29.83				32.73	36.32	620.3	621.7	621.7	620.3	621.7				620.3	620.3	0.92	0.99	0.94	0.88	0.98				0.52	0.58	0.79	0.68	0.67	0.71	0.59				0.63	0.52
57	15-Ketoiloprost [M-H-H2O]- C22H30O4 NIST 1206812	MS1	M-H2O-H	339.199	801.97	1503.98	1510.81	1464.94	1491.85	1466.87	1544	1588.01	1447.51	1468.92	1849	802.6	802.6	802.6	802.6	802.6	802.6	801.5	802.6	802.6	801.5	0.98	0.98	0.95	0.97	0.96	0.98	0.99	0.98	0.98	0.99	0.95	0.97	0.95	0.96	0.94	0.93	0.88	0.97	0.97	0.88
57	15-Ketoiloprost [M-H-H2O]- C22H30O4 NIST 1206812	MS2	M-H2O-H	339.2	801.97	1221.68	1332.83	1358.5	1154.53	1340.49	1325.1	1619.45	1174.15	1121.66	1561.19	802.6	802.6	802.6	802.6	802.6	802.6	801.5	802.6	802.6	801.5	0.98	0.98	0.95	0.97	0.96	0.98	0.99	0.98	0.98	0.99	0.99	0.98	0.95	0.99	0.94	0.98	0.88	0.99	0.99	0.97
57	15-Ketoiloprost [M-H-H2O]- C22H30O4 NIST 1206812	MS2	M-H2O-H	183.012	801.97	206.03	187.62	192.55	175.92	190.15	237.02	208.6	183.54	175.77	295.89	802.6	802.6	802.6	802.6	802.6	802.6	801.5	802.6	802.6	801.5	0.98	0.98	0.95	0.97	0.96	0.98	0.99	0.98	0.98	0.99	0.95	0.97	0.96	0.96	0.96	0.93	0.95	0.97	0.97	0.88
57	15-Ketoiloprost [M-H-H2O]- C22H30O4 NIST 1206812	MS2	M-H2O-H	119.051	801.97	3.8	2.52	3.53	2.9	1.62	3.74	3.02	3.74	5.42	3.56	802.6	802.6	802.6	802.6	802.6	802.6	801.5	802.6	802.6	801.5	0.98	0.98	0.95	0.97	0.96	0.98	0.99	0.98	0.98	0.99	0.71	0.62	0.67	0.75	0.61	0.83	0.74	0.76	0.78	0.81
57	15-Ketoiloprost [M-H-H2O]- C22H30O4 NIST 1206812	MS2	M-H2O-H	338.146	801.97	6.99	3.78	3.59	4.44	6.56	3.59	4.32	3.87	3.96	3.75	802.6	802.6	802.6	802.6	802.6	802.6	801.5	802.6	802.6	801.5	0.98	0.98	0.95	0.97	0.96	0.98	0.99	0.98	0.98	0.99	0.77	0.7	0.5	0.73	0.73	0.61	0.67	0.62	0.54	0.66
57	15-Ketoiloprost [M-H-H2O]- C22H30O4 NIST 1206812	MS2	M-H2O-H	239.074	801.97	4.52	6.89	3.16	2.85	5.47	9.48	1.58	3.41	4.53	12.8	802.6	802.6	802.6	802.6	802.6	802.6	801.5	802.6	802.6	801.5	0.98	0.98	0.95	0.97	0.96	0.98	0.99	0.98	0.98	0.99	0.59	0.81	0.65	0.74	0.8	0.81	0.61	0.75	0.69	0.8
57	15-Ketoiloprost [M-H-H2O]- C22H30O4 NIST 1206812	MS2	M-H2O-H	197.029	801.97	7.55	7.59	7.59	0	4.93	11.82	12.17	7.92	9.24	12.18	802.6	802.6	802.6	802.6	802.6	802.6	801.5	802.6	802.6	801.5	0.98	0.98	0.95	0.97	0.96	0.98	0.99	0.98	0.98	0.99	0.61	0.47	0.65	0	0.4	0.58	0.56	0.71	0.67	0.66
58	2,2'-Methylene-bis(6-tert-butyl-4 methylphenol) [M-H]- C23H32O2 NIST 1202717	MS1	M-H	339.231	833.06	46.02	35.62	40.81	45.59	40.61	40.21	40.66	47.3	45.23	44.78	832.6	832.6	832.6	832.6	832.6	832.6	832.6	832.6	832.6	832.6	0.96	0.96	0.96	0.96	0.96	0.95	0.97	0.96	0.97	0.97	0.91	0.8	0.94	0.96	0.93	0.95	0.95	0.94	0.86	0.87
58	2,2'-Methylene-bis(6-tert-butyl-4 methylphenol) [M-H]- C23H32O2 NIST 1202717	MS2	M-H	339.2	833.06	82.22	42.36	69.23	119.03	75.19	84.87	103.38	97.98	99.54	118.48	832.6	832.6	832.6	832.6	832.6	832.6	832.6	832.6	832.6	832.6	0.96	0.96	0.96	0.96	0.96	0.95	0.97	0.96	0.97	0.97	0.73	0.67	0.62	0.65	0.79	0.7	0.64	0.67	0.68	0.63
58	2,2'-Methylene-bis(6-tert-butyl-4 methylphenol) [M-H]- C23H32O2 NIST 1202717	MS2	M-H	163.113	833.06	17.78	8.68	15.34	19.37	13.1	14.94	14.33	12.95	13.19	14.77	832.6	832.6	832.6	832.6	832.6	832.6	832.6	832.6	832.6	832.6	0.96	0.96	0.96	0.96	0.96	0.95	0.97	0.96	0.97	0.97	0.94	0.9	0.97	0.96	0.96	0.98	0.95	0.94	0.92	0.95
58	2,2'-Methylene-bis(6-tert-butyl-4 methylphenol) [M-H]- C23H32O2 NIST 1202717	MS2	M-H	183.012	833.06	19.18	4.55	14.14	16.47	10.39	16.37	16.56	15.68	20.14	16.9	832.6	832.6	832.6	832.6	832.6	832.6	832.6	832.6	832.6	832.6	0.96	0.96	0.96	0.96	0.96	0.95	0.97	0.96	0.97	0.97	0.68	0.62	0.68	0.38	0.59	0.68	0.67	0.68	0.83	0.59
58	2,2'-Methylene-bis(6-tert-butyl-4 methylphenol) [M-H]- C23H32O2 NIST 1202717	MS2	M-H	339.232	833.06	15.14	4.1	14.93	9.47	8.61	14.87	9.77	13.94	5.6	12.31	832.6	832.6	832.6	832.6	832.6	832.6	832.6	832.6	832.6	832.6	0.96	0.96	0.96	0.96	0.96	0.95	0.97	0.96	0.97	0.97	0.91	0.75	0.94	0.98	0.93	0.95	0.96	0.95	0.73	0.87
58	2,2'-Methylene-bis(6-tert-butyl-4 methylphenol) [M-H]- C23H32O2 NIST 1202717	MS2	M-H	249.975	833.06	3	1.62	6.64	0	1.54	0.73	4.38	2.92	5.84	3	832.6	832.6	832.6	832.6	832.6	832.6	832.6	832.6	832.6	832.6	0.96	0.96	0.96	0.96	0.96	0.95	0.97	0.96	0.97	0.97	0.4	0.8	0.45	0	0.23	0.35	0.5	0.52	0.3	0.59
58	2,2'-Methylene-bis(6-tert-butyl-4 methylphenol) [M-H]- C23H32O2 NIST 1202717	MS2	M-H	184.029	833.06	1.46	1.81	1.67	0	2.64	0	1.95	1.84	4.24	3.69	832.6	832.6	832.6	832.6	832.6	832.6	832.6	832.6	832.6	832.6	0.96	0.96	0.96	0.96	0.96	0.95	0.97	0.96	0.97	0.97	0.21	0.67	0.15	0	0.49	0	0.24	0.33	0.86	0.36
59	Beta-Glycerophosphoric acid C3H9O6P MoNA 439210	MS1	2M-H	343.019	55.59						34.45	24.02		264.11	123.44						55.6	55.6		55.6	55.6						0.93	0.94		0.93	0.94						0.93	0.87		0.96	0.96
59	Beta-Glycerophosphoric acid C3H9O6P MoNA 439210	MS2	2M-H	171.005	55.59						13.08	11.05		335.91	55.29						55.6	55.6		55.6	55.6						0.93	0.94		0.93	0.94						0.93	0.87		0.96	0.98
59	Beta-Glycerophosphoric acid C3H9O6P MoNA 439210	MS2	2M-H	78.9586	55.59						4.21	4.29		47.72	15.79						55.6	55.6		55.6	55.6						0.93	0.94		0.93	0.94						0.94	0.8		0.99	0.83
59	Beta-Glycerophosphoric acid C3H9O6P MoNA 439210	MS2	2M-H	216.988	55.59						1.06	0		1.14	0.91						55.6	55.6		55.6	55.6						0.93	0.94		0.93	0.94						0.3	0		0.21	0.5
59	Beta-Glycerophosphoric acid C3H9O6P MoNA 439210	MS2	2M-H	232.848	55.59						1.25	0.31		0.47	0						55.6	55.6		55.6	55.6						0.93	0.94		0.93	0.94						0.72	0.89		0.85	0
59	Beta-Glycerophosphoric acid C3H9O6P MoNA 439210	MS2	2M-H	270.909	55.59						0	0		0.25	2.62						55.6	55.6		55.6	55.6						0.93	0.94		0.93	0.94						0	0		0.85	0.96
59	Beta-Glycerophosphoric acid C3H9O6P MoNA 439210	MS2	2M-H	96.9689	55.59						3.77	4.14		36.86	11.41						55.6	55.6		55.6	55.6						0.93	0.94		0.93	0.94						0.78	0.33		0.96	0.77
60	2'-DEOXYGUANOSINE 5'-MONOPHOSPHATE C10H14N5O7P---Adenosine 5'-monophosphate C10H14N5O7P---Adenosine 5'-monophosphate [M-H]- C10H14N5O7P NIST 1161751	MS1	M-H	346.055	78.72	4275.29	3561.86	6512.59	7041.26	9342.98	4079.32	2823.28	2065.49	12029	6850.19	81.2	80	80	81.2	80	80	80	80.1	80	80	0.93	0.91	0.9	0.89	0.96	0.97	0.9	0.75	0.91	0.78	0.84	0.95	0.94	0.94	0.95	0.95	0.89	0.97	0.99	0.94
60	2'-DEOXYGUANOSINE 5'-MONOPHOSPHATE C10H14N5O7P---Adenosine 5'-monophosphate C10H14N5O7P---Adenosine 5'-monophosphate [M-H]- C10H14N5O7P NIST 1161751	MS2	M-H	78.9591	78.72	529.27	511.14	776.69	675.68	1403.14	470.79	319.15	192.5	1171.22	596.89	81.2	80	80	81.2	80	80	80	80.1	80	80	0.93	0.91	0.9	0.89	0.96	0.97	0.9	0.75	0.91	0.78	0.68	0.93	0.89	0.94	0.89	0.87	0.86	0.97	0.95	0.94
60	2'-DEOXYGUANOSINE 5'-MONOPHOSPHATE C10H14N5O7P---Adenosine 5'-monophosphate C10H14N5O7P---Adenosine 5'-monophosphate [M-H]- C10H14N5O7P NIST 1161751	MS2	M-H	134.047	78.72	207.24	195.48	348.3	337.4	501.64	186.39	160.66	93.22	572.34	273.77	81.2	80	80	81.2	80	80	80	80.1	80	80	0.93	0.91	0.9	0.89	0.96	0.97	0.9	0.75	0.91	0.78	0.9	0.98	0.95	0.93	0.95	0.95	0.96	0.97	0.99	0.95
60	2'-DEOXYGUANOSINE 5'-MONOPHOSPHATE C10H14N5O7P---Adenosine 5'-monophosphate C10H14N5O7P---Adenosine 5'-monophosphate [M-H]- C10H14N5O7P NIST 1161751	MS2	M-H	346.055	78.72	1054.07	1250.4	1554.09	2155.47	2610.42	852.01	801.49	756.97	2466.29	2049.68	81.2	80	80	81.2	80	80	80	80.1	80	80	0.93	0.91	0.9	0.89	0.96	0.97	0.9	0.75	0.91	0.78	0.74	0.95	0.94	0.76	0.87	0.86	0.89	0.75	0.96	0.89
60	2'-DEOXYGUANOSINE 5'-MONOPHOSPHATE C10H14N5O7P---Adenosine 5'-monophosphate C10H14N5O7P---Adenosine 5'-monophosphate [M-H]- C10H14N5O7P NIST 1161751	MS2	M-H	96.9695	78.72	173.29	198.41	279.63	233.5	495.89	167.52	106.83	65.31	437.37	211.35	81.2	80	80	81.2	80	80	80	80.1	80	80	0.93	0.91	0.9	0.89	0.96	0.97	0.9	0.75	0.91	0.78	0.69	0.93	0.92	0.93	0.9	0.86	0.87	0.96	0.96	0.94
60	2'-DEOXYGUANOSINE 5'-MONOPHOSPHATE C10H14N5O7P---Adenosine 5'-monophosphate C10H14N5O7P---Adenosine 5'-monophosphate [M-H]- C10H14N5O7P NIST 1161751	MS2	M-H	150.979	78.72	41.83	53.75	55.34	63.35	94.03	31.95	34.73	17.08	106.45	45.32	81.2	80	80	81.2	80	80	80	80.1	80	80	0.93	0.91	0.9	0.89	0.96	0.97	0.9	0.75	0.91	0.78	0.77	0.93	0.94	0.96	0.98	0.95	0.87	0.92	0.99	0.94
60	2'-DEOXYGUANOSINE 5'-MONOPHOSPHATE C10H14N5O7P---Adenosine 5'-monophosphate C10H14N5O7P---Adenosine 5'-monophosphate [M-H]- C10H14N5O7P NIST 1161751	MS2	M-H	211.001	78.72	41.06	68.04	60.24	76.93	89.18	41.48	36.93	30.17	101.28	75.95	81.2	80	80	81.2	80	80	80	80.1	80	80	0.93	0.91	0.9	0.89	0.96	0.97	0.9	0.75	0.91	0.78	0.84	0.85	0.93	0.9	0.88	0.88	0.89	0.81	0.93	0.92
60	ISF of 2'-DEOXYGUANOSINE 5'-MONOPHOSPHATE C10H14N5O7P---Adenosine 5'-monophosphate C10H14N5O7P---Adenosine 5'-monophosphate [M-H]- C10H14N5O7P NIST 1161751	MS1	-	134.047	79.84	36.6		44.23		56.56	33.63				40.08	79.8		79.8		82.3	79.8				79.8	0.9		1		1	1				0.98	0.51		0.59		0.5	0.54				0.7
60	ISF of 2'-DEOXYGUANOSINE 5'-MONOPHOSPHATE C10H14N5O7P---Adenosine 5'-monophosphate C10H14N5O7P---Adenosine 5'-monophosphate [M-H]- C10H14N5O7P NIST 1161751	MS2	-	134.047	79.84	3.27		10.46		9.05	3.19				6.83	79.8		79.8		82.3	79.8				79.8	0.9		1		1	1				0.98	0.51		0.62		0.63	0.55				0.72
60	ISF of 2'-DEOXYGUANOSINE 5'-MONOPHOSPHATE C10H14N5O7P---Adenosine 5'-monophosphate C10H14N5O7P---Adenosine 5'-monophosphate [M-H]- C10H14N5O7P NIST 1161751	MS2	-	107.038	79.84	1.81		1.86		1.22	1.06				1.38	79.8		79.8		82.3	79.8				79.8	0.9		1		1	1				0.98	0.63		0.59		0.5	0.54				0.7
61	INOSINE 5'-PHOSPHATE C10H13N4O8P---Inosine 5'-monophosphate [M-H]- C10H13N4O8P NIST 1178901---Inosine-5'-monophosphate; LC-ESI-QTOF; MS2; CE C10H13N4O8P---Inosine-5-monophosphate C10H13N4O8P---Inosinic acid C10H13N4O8P MoNA 439080	MS1	M-H	347.038	65.91	452.89	369.67	358.8	411.15	880.09	281.72	107.33	5667.03	562.74	400.6	66.7	66.7	66.7	66.7	66.7	66.7	66.7	66.7	65.6	65.6	0.9	0.97	0.97	0.97	0.97	0.98	0.94	0.98	0.98	0.9	0.95	0.88	0.96	0.8	0.98	0.82	0.86	0.96	0.91	0.87
61	INOSINE 5'-PHOSPHATE C10H13N4O8P---Inosine 5'-monophosphate [M-H]- C10H13N4O8P NIST 1178901---Inosine-5'-monophosphate; LC-ESI-QTOF; MS2; CE C10H13N4O8P---Inosine-5-monophosphate C10H13N4O8P---Inosinic acid C10H13N4O8P MoNA 439080	MS2	M-H	78.9585	65.91	39.49	18.89	19.99	34.01	47.22	36.87	8	512.22	37.6	24.05	66.7	66.7	66.7	66.7	66.7	66.7	66.7	66.7	65.6	65.6	0.9	0.97	0.97	0.97	0.97	0.98	0.94	0.98	0.98	0.9	0.95	0.85	0.97	0.68	0.98	0.72	0.86	0.97	0.9	0.86
61	INOSINE 5'-PHOSPHATE C10H13N4O8P---Inosine 5'-monophosphate [M-H]- C10H13N4O8P NIST 1178901---Inosine-5'-monophosphate; LC-ESI-QTOF; MS2; CE C10H13N4O8P---Inosine-5-monophosphate C10H13N4O8P---Inosinic acid C10H13N4O8P MoNA 439080	MS2	M-H	347.039	65.91	195.82	123.4	80.91	65.56	188.63	92.16	33.39	1290.11	93.54	100.22	66.7	66.7	66.7	66.7	66.7	66.7	66.7	66.7	65.6	65.6	0.9	0.97	0.97	0.97	0.97	0.98	0.94	0.98	0.98	0.9	0.85	0.61	0.75	0.79	0.79	0.72	0.96	0.92	0.82	0.75
61	INOSINE 5'-PHOSPHATE C10H13N4O8P---Inosine 5'-monophosphate [M-H]- C10H13N4O8P NIST 1178901---Inosine-5'-monophosphate; LC-ESI-QTOF; MS2; CE C10H13N4O8P---Inosine-5-monophosphate C10H13N4O8P---Inosinic acid C10H13N4O8P MoNA 439080	MS2	M-H	96.9694	65.91	21.38	10.85	12	18.24	24.89	18.06	4.22	261.22	18.35	11.94	66.7	66.7	66.7	66.7	66.7	66.7	66.7	66.7	65.6	65.6	0.9	0.97	0.97	0.97	0.97	0.98	0.94	0.98	0.98	0.9	0.94	0.85	0.89	0.79	0.95	0.79	0.77	0.95	0.88	0.85
61	INOSINE 5'-PHOSPHATE C10H13N4O8P---Inosine 5'-monophosphate [M-H]- C10H13N4O8P NIST 1178901---Inosine-5'-monophosphate; LC-ESI-QTOF; MS2; CE C10H13N4O8P---Inosine-5-monophosphate C10H13N4O8P---Inosinic acid C10H13N4O8P MoNA 439080	MS2	M-H	135.032	65.91	28.25	13.15	15.39	20.53	39.09	16.22	6.16	301.89	30.22	22.47	66.7	66.7	66.7	66.7	66.7	66.7	66.7	66.7	65.6	65.6	0.9	0.97	0.97	0.97	0.97	0.98	0.94	0.98	0.98	0.9	0.91	0.89	0.96	0.92	0.98	0.88	0.86	0.96	0.95	0.87
61	INOSINE 5'-PHOSPHATE C10H13N4O8P---Inosine 5'-monophosphate [M-H]- C10H13N4O8P NIST 1178901---Inosine-5'-monophosphate; LC-ESI-QTOF; MS2; CE C10H13N4O8P---Inosine-5-monophosphate C10H13N4O8P---Inosinic acid C10H13N4O8P MoNA 439080	MS2	M-H	211.001	65.91	11.45	6.76	7.72	7.24	8.81	6.3	3.26	73.1	8.08	6.73	66.7	66.7	66.7	66.7	66.7	66.7	66.7	66.7	65.6	65.6	0.9	0.97	0.97	0.97	0.97	0.98	0.94	0.98	0.98	0.9	0.85	0.69	0.93	0.8	0.74	0.81	0.73	0.92	0.89	0.87
61	INOSINE 5'-PHOSPHATE C10H13N4O8P---Inosine 5'-monophosphate [M-H]- C10H13N4O8P NIST 1178901---Inosine-5'-monophosphate; LC-ESI-QTOF; MS2; CE C10H13N4O8P---Inosine-5-monophosphate C10H13N4O8P---Inosinic acid C10H13N4O8P MoNA 439080	MS2	M-H	150.981	65.91	5.47	4.96	2.52	3.9	5.15	3.53	1.64	48.99	4.58	3.77	66.7	66.7	66.7	66.7	66.7	66.7	66.7	66.7	65.6	65.6	0.9	0.97	0.97	0.97	0.97	0.98	0.94	0.98	0.98	0.9	0.95	0.88	0.72	0.66	0.9	0.82	0.51	0.92	0.91	0.81
62	Ascorbic acid C6H8O6	MS1	2M-H	351.055	56.05	27.26	32.86	40.54	49.36	79.29	13.55			65.33	38.13	55.6	55.6	55.6	55.6	55.6	56			55.6	55.6	0.86	0.78	0.82	0.8	0.79	0.78			0.87	0.83	0.8	0.82	0.97	0.91	0.89	0.63			0.92	0.93
62	Ascorbic acid C6H8O6	MS2	2M-H	351.053	56.05	1.91	2.96	7.34	6.99	19.9	1.92			18.31	7.57	55.6	55.6	55.6	55.6	55.6	56			55.6	55.6	0.86	0.78	0.82	0.8	0.79	0.78			0.87	0.83	0.8	0.82	0.84	0.72	0.89	0.63			0.79	0.93
62	Ascorbic acid C6H8O6	MS2	2M-H	175.025	56.05	4.78	5.67	4.78	5.34	9.23	0.95			11.57	3.19	55.6	55.6	55.6	55.6	55.6	56			55.6	55.6	0.86	0.78	0.82	0.8	0.79	0.78			0.87	0.83	0.85	0.86	0.91	0.87	0.93	0.87			0.95	0.91
62	Ascorbic acid C6H8O6	MS2	2M-H	115.004	56.05	2.3	2.35	2.36	3.67	6.66	0			8.56	2.53	55.6	55.6	55.6	55.6	55.6	56			55.6	55.6	0.86	0.78	0.82	0.8	0.79	0.78			0.87	0.83	0.8	0.82	0.98	0.97	0.8	0			0.91	0.94
62	Ascorbic acid C6H8O6	MS2	2M-H	96.9619	56.05	15.64	19.84	30.38	32.6	60.25	24.14			42.16	15.02	55.6	55.6	55.6	55.6	55.6	56			55.6	55.6	0.86	0.78	0.82	0.8	0.79	0.78			0.87	0.83	0.74	0.66	0.97	0.91	0.76	0.17			0.92	0.9
62	Ascorbic acid C6H8O6	MS2	2M-H	234.936	56.05	0	0	2.51	0.63	0	0			0	0	55.6	55.6	55.6	55.6	55.6	56			55.6	55.6	0.86	0.78	0.82	0.8	0.79	0.78			0.87	0.83	0	0	0.39	0.42	0	0			0	0
62	Ascorbic acid C6H8O6	MS2	2M-H	252.939	56.05	0	0	0	0	0.98	0			0	0	55.6	55.6	55.6	55.6	55.6	56			55.6	55.6	0.86	0.78	0.82	0.8	0.79	0.78			0.87	0.83	0	0	0	0	0.37	0			0	0
63	Guanosine 5'-monophosphate C10H14N5O8P---Guanosine 5'-monophosphate; LC-ESI-QTOF; MS2; CE C10H14N5O8P---Guanosine monophosphate C10H14N5O8P MassBank 5252---Guanosine monophosphate C10H14N5O8P MoNA 439075	MS1	M-H	362.049	64.96	496.91	395.36	767.56	876.82	1135.12	407.06	346.24	102.65	1460.86	662.26	65.6	65.6	65.6	65.6	65.6	65.6	65.6	65.6	65.6	65.6	0.95	0.97	0.98	0.99	0.88	0.98	0.98	0.95	0.97	0.99	0.84	0.9	0.91	0.92	0.93	0.75	0.89	0.96	0.94	0.89
63	Guanosine 5'-monophosphate C10H14N5O8P---Guanosine 5'-monophosphate; LC-ESI-QTOF; MS2; CE C10H14N5O8P---Guanosine monophosphate C10H14N5O8P MassBank 5252---Guanosine monophosphate C10H14N5O8P MoNA 439075	MS2	M-H	78.9592	64.96	25.68	27.75	86.84	86.19	145.49	35.61	19.99	12.46	151.74	104.66	65.6	65.6	65.6	65.6	65.6	65.6	65.6	65.6	65.6	65.6	0.95	0.97	0.98	0.99	0.88	0.98	0.98	0.95	0.97	0.99	0.69	0.81	0.87	0.97	0.95	0.74	0.87	0.97	0.94	0.89
63	Guanosine 5'-monophosphate C10H14N5O8P---Guanosine 5'-monophosphate; LC-ESI-QTOF; MS2; CE C10H14N5O8P---Guanosine monophosphate C10H14N5O8P MassBank 5252---Guanosine monophosphate C10H14N5O8P MoNA 439075	MS2	M-H	362.049	64.96	46.93	54.29	133.61	338.87	482.44	73.76	45.77	14.13	259.94	144.09	65.6	65.6	65.6	65.6	65.6	65.6	65.6	65.6	65.6	65.6	0.95	0.97	0.98	0.99	0.88	0.98	0.98	0.95	0.97	0.99	0.84	0.89	0.88	0.49	0.82	0.67	0.78	0.96	0.92	0.75
63	Guanosine 5'-monophosphate C10H14N5O8P---Guanosine 5'-monophosphate; LC-ESI-QTOF; MS2; CE C10H14N5O8P---Guanosine monophosphate C10H14N5O8P MassBank 5252---Guanosine monophosphate C10H14N5O8P MoNA 439075	MS2	M-H	211.001	64.96	16.55	13.71	28.62	44.52	74.06	11.61	9.34	3.93	57.28	40.78	65.6	65.6	65.6	65.6	65.6	65.6	65.6	65.6	65.6	65.6	0.95	0.97	0.98	0.99	0.88	0.98	0.98	0.95	0.97	0.99	0.87	0.9	0.91	0.77	0.93	0.75	0.9	0.92	0.94	0.9
63	Guanosine 5'-monophosphate C10H14N5O8P---Guanosine 5'-monophosphate; LC-ESI-QTOF; MS2; CE C10H14N5O8P---Guanosine monophosphate C10H14N5O8P MassBank 5252---Guanosine monophosphate C10H14N5O8P MoNA 439075	MS2	M-H	150.042	64.96	7.95	5.07	11.44	12.93	14.09	6.07	5.82	1.82	22.24	11.66	65.6	65.6	65.6	65.6	65.6	65.6	65.6	65.6	65.6	65.6	0.95	0.97	0.98	0.99	0.88	0.98	0.98	0.95	0.97	0.99	0.84	0.94	0.95	0.92	0.86	0.77	0.89	0.51	0.93	0.89
63	Guanosine 5'-monophosphate C10H14N5O8P---Guanosine 5'-monophosphate; LC-ESI-QTOF; MS2; CE C10H14N5O8P---Guanosine monophosphate C10H14N5O8P MassBank 5252---Guanosine monophosphate C10H14N5O8P MoNA 439075	MS2	M-H	133.015	64.96	3.08	1.18	4.01	4.42	5.06	1.12	1.3	0	10.58	3.19	65.6	65.6	65.6	65.6	65.6	65.6	65.6	65.6	65.6	65.6	0.95	0.97	0.98	0.99	0.88	0.98	0.98	0.95	0.97	0.99	0.83	0.63	0.87	0.87	0.92	0.49	0.65	0	0.85	0.84
63	Guanosine 5'-monophosphate C10H14N5O8P---Guanosine 5'-monophosphate; LC-ESI-QTOF; MS2; CE C10H14N5O8P---Guanosine monophosphate C10H14N5O8P MassBank 5252---Guanosine monophosphate C10H14N5O8P MoNA 439075	MS2	M-H	96.9691	64.96	5.86	5.04	12.47	10.9	16.54	5.68	2.3	2.67	19.18	8.84	65.6	65.6	65.6	65.6	65.6	65.6	65.6	65.6	65.6	65.6	0.95	0.97	0.98	0.99	0.88	0.98	0.98	0.95	0.97	0.99	0.71	0.62	0.79	0.87	0.78	0.74	0.61	0.87	0.91	0.85
64	S-(5'-ADENOSYL)-L-HOMOCYSTEINE C14H20N6O5S---S-Adenosyl-homocysteine C14H20N6O5S---S-Adenosylhomocysteine C14H20N6O5S MassBank 6264	MS1	M-H	383.113	258.03	85.59	57.04	76.29	70.63	130.31	22.62	31.62	6.04	122.76	54.02	257.6	257.6	258.8	258.7	257.6	258.7	257.6	258	258.7	258.7	0.9	0.85	0.92	0.97	0.97	0.89	0.74	0.94	0.96	0.94	0.85	0.79	0.9	0.61	0.82	0.61	0.51	0.55	0.88	0.8
64	S-(5'-ADENOSYL)-L-HOMOCYSTEINE C14H20N6O5S---S-Adenosyl-homocysteine C14H20N6O5S---S-Adenosylhomocysteine C14H20N6O5S MassBank 6264	MS2	M-H	134.047	258.03	36.5	23.49	43.13	32.92	56.29	8.27	7.09	4.14	48.03	27.32	257.6	257.6	258.8	258.7	257.6	258.7	257.6	258	258.7	258.7	0.9	0.85	0.92	0.97	0.97	0.89	0.74	0.94	0.96	0.94	0.95	0.96	0.95	0.91	0.86	0.85	0.87	0.73	0.95	0.86
64	S-(5'-ADENOSYL)-L-HOMOCYSTEINE C14H20N6O5S---S-Adenosyl-homocysteine C14H20N6O5S---S-Adenosylhomocysteine C14H20N6O5S MassBank 6264	MS2	M-H	383.112	258.03	19.28	17.03	19.1	9.59	16.43	3.01	10.58	1.01	21.26	13.07	257.6	257.6	258.8	258.7	257.6	258.7	257.6	258	258.7	258.7	0.9	0.85	0.92	0.97	0.97	0.89	0.74	0.94	0.96	0.94	0.78	0.79	0.9	0.61	0.82	0.61	0.51	0.55	0.88	0.8
64	S-(5'-ADENOSYL)-L-HOMOCYSTEINE C14H20N6O5S---S-Adenosyl-homocysteine C14H20N6O5S---S-Adenosylhomocysteine C14H20N6O5S MassBank 6264	MS2	M-H	188.038	258.03	0.7	0	0.77	1.27	0.7	0	0.91	0	0.49	0	257.6	257.6	258.8	258.7	257.6	258.7	257.6	258	258.7	258.7	0.9	0.85	0.92	0.97	0.97	0.89	0.74	0.94	0.96	0.94	0.85	0	0.63	0.48	0.59	0	0.35	0	0.65	0
64	S-(5'-ADENOSYL)-L-HOMOCYSTEINE C14H20N6O5S---S-Adenosyl-homocysteine C14H20N6O5S---S-Adenosylhomocysteine C14H20N6O5S MassBank 6264	MS2	M-H	107.036	258.03	0	0	0	0	0	0	0	0	0	0	257.6	257.6	258.8	258.7	257.6	258.7	257.6	258	258.7	258.7	0.9	0.85	0.92	0.97	0.97	0.89	0.74	0.94	0.96	0.94	0	0	0	0	0	0	0	0	0	0
64	S-(5'-ADENOSYL)-L-HOMOCYSTEINE C14H20N6O5S---S-Adenosyl-homocysteine C14H20N6O5S---S-Adenosylhomocysteine C14H20N6O5S MassBank 6264	MS2	M-H	248.059	258.03	0	0.16	0	0	0	0	0.16	0	0	0	257.6	257.6	258.8	258.7	257.6	258.7	257.6	258	258.7	258.7	0.9	0.85	0.92	0.97	0.97	0.89	0.74	0.94	0.96	0.94	0	0.53	0	0	0	0	0.35	0	0	0
64	S-(5'-ADENOSYL)-L-HOMOCYSTEINE C14H20N6O5S---S-Adenosyl-homocysteine C14H20N6O5S---S-Adenosylhomocysteine C14H20N6O5S MassBank 6264	MS2	M-H	86.9913	258.03	0.86	0	0.62	0	0.33	0	0	0	0	0	257.6	257.6	258.8	258.7	257.6	258.7	257.6	258	258.7	258.7	0.9	0.85	0.92	0.97	0.97	0.89	0.74	0.94	0.96	0.94	0.72	0	0.63	0	0.49	0	0	0	0	0
65	6.alpha.-Mannobiose [M-H]- C12H22O11 NIST 1068413---6.alpha.-Mannobiose [M-H]- C12H22O11 NIST 1068416---6.alpha.-Mannobiose [M-H]- C12H22O11 NIST 1068417---D-(+)-Trehalose; LC-ESI-QTOF; MS2; CE C12H22O11---Palatinose C12H22O11---Sucrose C12H22O11---Sucrose; LC-ESI-QTOF; MS2; CE C12H22O11	MS1	M+HCOO	387.113	65.07	264.81	597.35	354.38	439.8	451.98	127.53	166.47	94.23	103.13	129.34	63.4	64.5	64.5	66.7	65.6	65.6	64.5	61.2	61.2	62.3	0.99	0.94	0.99	0.97	0.97	0.99	0.95	0.98	0.99	0.98	0.93	0.96	0.91	0.76	0.9	0.86	0.91	0.74	0.71	0.88
65	6.alpha.-Mannobiose [M-H]- C12H22O11 NIST 1068413---6.alpha.-Mannobiose [M-H]- C12H22O11 NIST 1068416---6.alpha.-Mannobiose [M-H]- C12H22O11 NIST 1068417---D-(+)-Trehalose; LC-ESI-QTOF; MS2; CE C12H22O11---Palatinose C12H22O11---Sucrose C12H22O11---Sucrose; LC-ESI-QTOF; MS2; CE C12H22O11	MS2	M+HCOO	179.056	65.07	63.86	211.03	46.06	42.64	59.22	14.96	49.16	6.23	14.99	14.61	63.4	64.5	64.5	66.7	65.6	65.6	64.5	61.2	61.2	62.3	0.99	0.94	0.99	0.97	0.97	0.99	0.95	0.98	0.99	0.98	0.78	0.91	0.91	0.76	0.9	0.81	0.76	0.7	0.75	0.86
65	6.alpha.-Mannobiose [M-H]- C12H22O11 NIST 1068413---6.alpha.-Mannobiose [M-H]- C12H22O11 NIST 1068416---6.alpha.-Mannobiose [M-H]- C12H22O11 NIST 1068417---D-(+)-Trehalose; LC-ESI-QTOF; MS2; CE C12H22O11---Palatinose C12H22O11---Sucrose C12H22O11---Sucrose; LC-ESI-QTOF; MS2; CE C12H22O11	MS2	M+HCOO	221.066	65.07	60.85	130.14	53.71	34.6	52.11	16.25	25.1	14.16	12.34	24.71	63.4	64.5	64.5	66.7	65.6	65.6	64.5	61.2	61.2	62.3	0.99	0.94	0.99	0.97	0.97	0.99	0.95	0.98	0.99	0.98	0.93	0.94	0.84	0.47	0.71	0.58	0.82	0.74	0.71	0.88
65	6.alpha.-Mannobiose [M-H]- C12H22O11 NIST 1068413---6.alpha.-Mannobiose [M-H]- C12H22O11 NIST 1068416---6.alpha.-Mannobiose [M-H]- C12H22O11 NIST 1068417---D-(+)-Trehalose; LC-ESI-QTOF; MS2; CE C12H22O11---Palatinose C12H22O11---Sucrose C12H22O11---Sucrose; LC-ESI-QTOF; MS2; CE C12H22O11	MS2	M+HCOO	113.024	65.07	42.09	87.3	45.47	35.64	38.89	6.63	21.92	6.02	7.61	8.88	63.4	64.5	64.5	66.7	65.6	65.6	64.5	61.2	61.2	62.3	0.99	0.94	0.99	0.97	0.97	0.99	0.95	0.98	0.99	0.98	0.93	0.95	0.86	0.66	0.81	0.77	0.92	0.61	0.69	0.81
65	6.alpha.-Mannobiose [M-H]- C12H22O11 NIST 1068413---6.alpha.-Mannobiose [M-H]- C12H22O11 NIST 1068416---6.alpha.-Mannobiose [M-H]- C12H22O11 NIST 1068417---D-(+)-Trehalose; LC-ESI-QTOF; MS2; CE C12H22O11---Palatinose C12H22O11---Sucrose C12H22O11---Sucrose; LC-ESI-QTOF; MS2; CE C12H22O11	MS2	M+HCOO	89.0244	65.07	30.13	62.16	38.95	35.76	43.22	11.64	22.23	11.57	10.26	13.12	63.4	64.5	64.5	66.7	65.6	65.6	64.5	61.2	61.2	62.3	0.99	0.94	0.99	0.97	0.97	0.99	0.95	0.98	0.99	0.98	0.94	0.97	0.83	0.74	0.83	0.86	0.91	0.57	0.57	0.86
65	6.alpha.-Mannobiose [M-H]- C12H22O11 NIST 1068413---6.alpha.-Mannobiose [M-H]- C12H22O11 NIST 1068416---6.alpha.-Mannobiose [M-H]- C12H22O11 NIST 1068417---D-(+)-Trehalose; LC-ESI-QTOF; MS2; CE C12H22O11---Palatinose C12H22O11---Sucrose C12H22O11---Sucrose; LC-ESI-QTOF; MS2; CE C12H22O11	MS2	M+HCOO	119.035	65.07	25.97	62.02	29.14	25.78	35.47	10.93	23.48	7.15	7.31	7.03	63.4	64.5	64.5	66.7	65.6	65.6	64.5	61.2	61.2	62.3	0.99	0.94	0.99	0.97	0.97	0.99	0.95	0.98	0.99	0.98	0.91	0.96	0.94	0.93	0.9	0.89	0.9	0.69	0.69	0.83
65	6.alpha.-Mannobiose [M-H]- C12H22O11 NIST 1068413---6.alpha.-Mannobiose [M-H]- C12H22O11 NIST 1068416---6.alpha.-Mannobiose [M-H]- C12H22O11 NIST 1068417---D-(+)-Trehalose; LC-ESI-QTOF; MS2; CE C12H22O11---Palatinose C12H22O11---Sucrose C12H22O11---Sucrose; LC-ESI-QTOF; MS2; CE C12H22O11	MS2	M+HCOO	101.024	65.07	19.61	48.55	26.58	14.01	24.55	6	12.7	8.15	7.07	9.64	63.4	64.5	64.5	66.7	65.6	65.6	64.5	61.2	61.2	62.3	0.99	0.94	0.99	0.97	0.97	0.99	0.95	0.98	0.99	0.98	0.9	0.93	0.87	0.66	0.82	0.62	0.91	0.79	0.68	0.9
66	Adenosine 5'-diphosphate [2M-H]- C10H15N5O10P2 NIST 1161639---Adenosine 5'-diphosphate [M-H]- C10H15N5O10P2 NIST 1161684---Adenosine 5'-diphosphate [M-H]- C10H15N5O10P2 NIST 1161685	MS1	M-H	426.02	74.34		25.22	73.58	142.36	265.33	26.55	47.34	122.66	1313.06	48.35		74.3	74.3	74.5	73.4	74.3	74.3	73.4	68.9	74.3		0.69	0.8	0.92	0.94	0.82	0.87	0.9	0.96	0.79		0.51	0.72	0.77	0.85	0.54	0.67	0.83	0.98	0.62
66	Adenosine 5'-diphosphate [2M-H]- C10H15N5O10P2 NIST 1161639---Adenosine 5'-diphosphate [M-H]- C10H15N5O10P2 NIST 1161684---Adenosine 5'-diphosphate [M-H]- C10H15N5O10P2 NIST 1161685	MS2	M-H	158.925	74.34		0	6.92	20.66	34.98	3.69	10.08	17.21	195.78	7.24		74.3	74.3	74.5	73.4	74.3	74.3	73.4	68.9	74.3		0.69	0.8	0.92	0.94	0.82	0.87	0.9	0.96	0.79		0	0.72	0.82	0.91	0.51	0.67	0.83	0.98	0.8
66	Adenosine 5'-diphosphate [2M-H]- C10H15N5O10P2 NIST 1161639---Adenosine 5'-diphosphate [M-H]- C10H15N5O10P2 NIST 1161684---Adenosine 5'-diphosphate [M-H]- C10H15N5O10P2 NIST 1161685	MS2	M-H	134.047	74.34		17.29	29.36	44.25	54.27	35.49	26.3	21.49	165.39	25.48		74.3	74.3	74.5	73.4	74.3	74.3	73.4	68.9	74.3		0.69	0.8	0.92	0.94	0.82	0.87	0.9	0.96	0.79		0.55	0.7	0.6	0.71	0.57	0.67	0.64	0.98	0.61
66	Adenosine 5'-diphosphate [2M-H]- C10H15N5O10P2 NIST 1161639---Adenosine 5'-diphosphate [M-H]- C10H15N5O10P2 NIST 1161684---Adenosine 5'-diphosphate [M-H]- C10H15N5O10P2 NIST 1161685	MS2	M-H	426.02	74.34		8.25	20.58	37.88	55.42	9.1	17.97	34.21	421.44	19.95		74.3	74.3	74.5	73.4	74.3	74.3	73.4	68.9	74.3		0.69	0.8	0.92	0.94	0.82	0.87	0.9	0.96	0.79		0.51	0.79	0.77	0.85	0.54	0.67	0.83	0.98	0.56
66	Adenosine 5'-diphosphate [2M-H]- C10H15N5O10P2 NIST 1161639---Adenosine 5'-diphosphate [M-H]- C10H15N5O10P2 NIST 1161684---Adenosine 5'-diphosphate [M-H]- C10H15N5O10P2 NIST 1161685	MS2	M-H	78.9586	74.34		2.76	10.23	12.89	25.32	0	0	12.08	66.88	7.42		74.3	74.3	74.5	73.4	74.3	74.3	73.4	68.9	74.3		0.69	0.8	0.92	0.94	0.82	0.87	0.9	0.96	0.79		0.35	0.65	0.52	0.73	0	0	0.58	0.96	0.62
66	Adenosine 5'-diphosphate [2M-H]- C10H15N5O10P2 NIST 1161639---Adenosine 5'-diphosphate [M-H]- C10H15N5O10P2 NIST 1161684---Adenosine 5'-diphosphate [M-H]- C10H15N5O10P2 NIST 1161685	MS2	M-H	328.044	74.34		0	0	6.32	18.26	0	2.22	4.46	77.05	2		74.3	74.3	74.5	73.4	74.3	74.3	73.4	68.9	74.3		0.69	0.8	0.92	0.94	0.82	0.87	0.9	0.96	0.79		0	0	0.63	0.72	0	0.34	0.38	0.93	0.36
66	Adenosine 5'-diphosphate [2M-H]- C10H15N5O10P2 NIST 1161639---Adenosine 5'-diphosphate [M-H]- C10H15N5O10P2 NIST 1161684---Adenosine 5'-diphosphate [M-H]- C10H15N5O10P2 NIST 1161685	MS2	M-H	408.01	74.34		0	0	5.8	10.45	0	0	0	77.26	0		74.3	74.3	74.5	73.4	74.3	74.3	73.4	68.9	74.3		0.69	0.8	0.92	0.94	0.82	0.87	0.9	0.96	0.79		0	0	0.48	0.45	0	0	0	0.9	0
67	Riboflavin-5'-monophosphate; LC-ESI-QTOF; MS2; CE C17H21N4O9P	MS1	M-H	455.094	394.91									21.75										394.9										0.88										0.7
67	Riboflavin-5'-monophosphate; LC-ESI-QTOF; MS2; CE C17H21N4O9P	MS2	M-H	455.096	394.91									2.73										394.9										0.88										0.74
67	Riboflavin-5'-monophosphate; LC-ESI-QTOF; MS2; CE C17H21N4O9P	MS2	M-H	96.97	394.91									1.52										394.9										0.88										0.6
67	Riboflavin-5'-monophosphate; LC-ESI-QTOF; MS2; CE C17H21N4O9P	MS2	M-H	255.091	394.91									0.49										394.9										0.88										0.55
67	Riboflavin-5'-monophosphate; LC-ESI-QTOF; MS2; CE C17H21N4O9P	MS2	M-H	78.9593	394.91									0										394.9										0.88										0
67	Riboflavin-5'-monophosphate; LC-ESI-QTOF; MS2; CE C17H21N4O9P	MS2	M-H	213.016	394.91									1.05										394.9										0.88										0.7
67	Riboflavin-5'-monophosphate; LC-ESI-QTOF; MS2; CE C17H21N4O9P	MS2	M-H	241.072	394.91									0										394.9										0.88										0
68	D-Ribose 5-phosphate [M-H]- C5H11O8P NIST 1159949	MS1	2M-H	459.028	55.19					5.74	1.88	0.24	28.31	3.9	14.57					55.2	55.2	55.2	55.6	55.2	55.2					0.89	0.9	0.84	0.88	0.89	0.95					0.68	0.99	0.58	0.82	0.74	0.93
68	D-Ribose 5-phosphate [M-H]- C5H11O8P NIST 1159949	MS2	2M-H	96.97	55.19					15.45	3.68	3.84	3.34	13.08	8.34					55.2	55.2	55.2	55.6	55.2	55.2					0.89	0.9	0.84	0.88	0.89	0.95					0.68	0.75	0.58	0.82	0.74	0.87
68	D-Ribose 5-phosphate [M-H]- C5H11O8P NIST 1159949	MS2	2M-H	259.024	55.19					15.65	1.57	2.81	13.54	6.5	7.69					55.2	55.2	55.2	55.6	55.2	55.2					0.89	0.9	0.84	0.88	0.89	0.95					0.79	0.99	0.27	0.82	0.48	0.97
68	D-Ribose 5-phosphate [M-H]- C5H11O8P NIST 1159949	MS2	2M-H	242.923	55.19					0	0	0	0	0	0					55.2	55.2	55.2	55.6	55.2	55.2					0.89	0.9	0.84	0.88	0.89	0.95					0	0	0	0	0	0
68	D-Ribose 5-phosphate [M-H]- C5H11O8P NIST 1159949	MS2	2M-H	241.925	55.19					0	0	0	0	0	0.16					55.2	55.2	55.2	55.6	55.2	55.2					0.89	0.9	0.84	0.88	0.89	0.95					0	0	0	0	0	0.24
68	D-Ribose 5-phosphate [M-H]- C5H11O8P NIST 1159949	MS2	2M-H	366.935	55.19					0	0	0	0	0	0.2					55.2	55.2	55.2	55.6	55.2	55.2					0.89	0.9	0.84	0.88	0.89	0.95					0	0	0	0	0	0.74
68	D-Ribose 5-phosphate [M-H]- C5H11O8P NIST 1159949	MS2	2M-H	199	55.19					0	0.87	1.3	2.1	2.81	3.45					55.2	55.2	55.2	55.6	55.2	55.2					0.89	0.9	0.84	0.88	0.89	0.95					0	0.99	0.96	0.82	0.99	0.93
69	lysoPE 18:2; [M-H]-; PE(18:2(2E,4E)/0:0) C23H44NO7P---lysoPE 18:2; [M-H]-; PE(18:2(6Z,9Z)/0:0) C23H44NO7P---lysoPE 18:2; [M-H]-; PE(18:2(9E,10E)/0:0) C23H44NO7P---lysoPE 18:2; [M-H]-; PE(18:2(9E,12E)/0:0) C23H44NO7P---lysoPE 18:2; [M-H]-; PE(18:2(9Z,11Z)/0:0) C23H44NO7P---lysoPE 18:2; [M-H]-; PE(18:2(9Z,12Z)/0:0) C23H44NO7P	MS1	M-H	476.276	799.13	0.98	7.45			8.19						799.1	799.1			799.1						0.67	0.88			0.81						0.53	0.56			0.67
69	lysoPE 18:2; [M-H]-; PE(18:2(2E,4E)/0:0) C23H44NO7P---lysoPE 18:2; [M-H]-; PE(18:2(6Z,9Z)/0:0) C23H44NO7P---lysoPE 18:2; [M-H]-; PE(18:2(9E,10E)/0:0) C23H44NO7P---lysoPE 18:2; [M-H]-; PE(18:2(9E,12E)/0:0) C23H44NO7P---lysoPE 18:2; [M-H]-; PE(18:2(9Z,11Z)/0:0) C23H44NO7P---lysoPE 18:2; [M-H]-; PE(18:2(9Z,12Z)/0:0) C23H44NO7P	MS2	M-H	279.233	799.13	2.14	3.15			6.57						799.1	799.1			799.1						0.67	0.88			0.81						0.31	0.69			0.88
69	lysoPE 18:2; [M-H]-; PE(18:2(2E,4E)/0:0) C23H44NO7P---lysoPE 18:2; [M-H]-; PE(18:2(6Z,9Z)/0:0) C23H44NO7P---lysoPE 18:2; [M-H]-; PE(18:2(9E,10E)/0:0) C23H44NO7P---lysoPE 18:2; [M-H]-; PE(18:2(9E,12E)/0:0) C23H44NO7P---lysoPE 18:2; [M-H]-; PE(18:2(9Z,11Z)/0:0) C23H44NO7P---lysoPE 18:2; [M-H]-; PE(18:2(9Z,12Z)/0:0) C23H44NO7P	MS2	M-H	476.274	799.13	2.02	1.12			2.46						799.1	799.1			799.1						0.67	0.88			0.81						0.4	0.19			0.67
69	lysoPE 18:2; [M-H]-; PE(18:2(2E,4E)/0:0) C23H44NO7P---lysoPE 18:2; [M-H]-; PE(18:2(6Z,9Z)/0:0) C23H44NO7P---lysoPE 18:2; [M-H]-; PE(18:2(9E,10E)/0:0) C23H44NO7P---lysoPE 18:2; [M-H]-; PE(18:2(9E,12E)/0:0) C23H44NO7P---lysoPE 18:2; [M-H]-; PE(18:2(9Z,11Z)/0:0) C23H44NO7P---lysoPE 18:2; [M-H]-; PE(18:2(9Z,12Z)/0:0) C23H44NO7P	MS2	M-H	340.202	799.13	10.19	12.85			11.69						799.1	799.1			799.1						0.67	0.88			0.81						0.53	0.37			0.63
69	lysoPE 18:2; [M-H]-; PE(18:2(2E,4E)/0:0) C23H44NO7P---lysoPE 18:2; [M-H]-; PE(18:2(6Z,9Z)/0:0) C23H44NO7P---lysoPE 18:2; [M-H]-; PE(18:2(9E,10E)/0:0) C23H44NO7P---lysoPE 18:2; [M-H]-; PE(18:2(9E,12E)/0:0) C23H44NO7P---lysoPE 18:2; [M-H]-; PE(18:2(9Z,11Z)/0:0) C23H44NO7P---lysoPE 18:2; [M-H]-; PE(18:2(9Z,12Z)/0:0) C23H44NO7P	MS2	M-H	408.189	799.13	0.83	0.42			0.21						799.1	799.1			799.1						0.67	0.88			0.81						0.77	0.56			0.59
69	lysoPE 18:2; [M-H]-; PE(18:2(2E,4E)/0:0) C23H44NO7P---lysoPE 18:2; [M-H]-; PE(18:2(6Z,9Z)/0:0) C23H44NO7P---lysoPE 18:2; [M-H]-; PE(18:2(9E,10E)/0:0) C23H44NO7P---lysoPE 18:2; [M-H]-; PE(18:2(9E,12E)/0:0) C23H44NO7P---lysoPE 18:2; [M-H]-; PE(18:2(9Z,11Z)/0:0) C23H44NO7P---lysoPE 18:2; [M-H]-; PE(18:2(9Z,12Z)/0:0) C23H44NO7P	MS2	M-H	214.046	799.13	0	0			0						799.1	799.1			799.1						0.67	0.88			0.81						0	0			0
69	lysoPE 18:2; [M-H]-; PE(18:2(2E,4E)/0:0) C23H44NO7P---lysoPE 18:2; [M-H]-; PE(18:2(6Z,9Z)/0:0) C23H44NO7P---lysoPE 18:2; [M-H]-; PE(18:2(9E,10E)/0:0) C23H44NO7P---lysoPE 18:2; [M-H]-; PE(18:2(9E,12E)/0:0) C23H44NO7P---lysoPE 18:2; [M-H]-; PE(18:2(9Z,11Z)/0:0) C23H44NO7P---lysoPE 18:2; [M-H]-; PE(18:2(9Z,12Z)/0:0) C23H44NO7P	MS2	M-H	140.012	799.13	0	0			0						799.1	799.1			799.1						0.67	0.88			0.81						0	0			0
70	1-Stearoyl-2-hydroxy-sn-glycero-3-phosphoethanolamine [M-H]- C23H48NO7P NIST 1151471---1-Stearoyl-2-hydroxy-sn-glycero-3-phosphoethanolamine [M-H]- C23H48NO7P NIST 1151472---1-Stearoyl-2-hydroxy-sn-glycero-3-phosphoethanolamine [M-H]- C23H48NO7P NIST 1151481---lysoPE 18:0; [M-H]-; PE(18:0/0:0) C23H48NO7P	MS1	M-H	480.307	853.52	14.21	14.9	13.63	13.39	12.45	14.93	11.31	11.43	12.63	12.46	853.5	853.5	853.5	853.5	853.5	853.5	853.5	853.5	853.5	853.5	0.75	0.92	0.96	0.76	0.93	0.73	0.9	0.89	0.97	0.9	0.53	0.52	0.57	0.62	0.85	0.59	0.53	0.76	0.58	0.77
70	1-Stearoyl-2-hydroxy-sn-glycero-3-phosphoethanolamine [M-H]- C23H48NO7P NIST 1151471---1-Stearoyl-2-hydroxy-sn-glycero-3-phosphoethanolamine [M-H]- C23H48NO7P NIST 1151472---1-Stearoyl-2-hydroxy-sn-glycero-3-phosphoethanolamine [M-H]- C23H48NO7P NIST 1151481---lysoPE 18:0; [M-H]-; PE(18:0/0:0) C23H48NO7P	MS2	M-H	283.264	853.52	11.3	10.52	14.49	18.6	17.59	9.82	10.43	18.69	13.23	15.33	853.5	853.5	853.5	853.5	853.5	853.5	853.5	853.5	853.5	853.5	0.75	0.92	0.96	0.76	0.93	0.73	0.9	0.89	0.97	0.9	0.75	0.55	0.57	0.85	0.85	0.59	0.73	0.76	0.78	0.77
70	1-Stearoyl-2-hydroxy-sn-glycero-3-phosphoethanolamine [M-H]- C23H48NO7P NIST 1151471---1-Stearoyl-2-hydroxy-sn-glycero-3-phosphoethanolamine [M-H]- C23H48NO7P NIST 1151472---1-Stearoyl-2-hydroxy-sn-glycero-3-phosphoethanolamine [M-H]- C23H48NO7P NIST 1151481---lysoPE 18:0; [M-H]-; PE(18:0/0:0) C23H48NO7P	MS2	M-H	480.358	853.52	0	4.62	7.12	0	9.33	0	15.17	7.53	10.58	8.77	853.5	853.5	853.5	853.5	853.5	853.5	853.5	853.5	853.5	853.5	0.75	0.92	0.96	0.76	0.93	0.73	0.9	0.89	0.97	0.9	0	0.2	0.48	0	0.33	0	0.24	0.27	0.23	0.3
70	1-Stearoyl-2-hydroxy-sn-glycero-3-phosphoethanolamine [M-H]- C23H48NO7P NIST 1151471---1-Stearoyl-2-hydroxy-sn-glycero-3-phosphoethanolamine [M-H]- C23H48NO7P NIST 1151472---1-Stearoyl-2-hydroxy-sn-glycero-3-phosphoethanolamine [M-H]- C23H48NO7P NIST 1151481---lysoPE 18:0; [M-H]-; PE(18:0/0:0) C23H48NO7P	MS2	M-H	480.31	853.52	3.69	3.71	3.69	5.72	8.3	5.73	5.15	6.81	6.06	4.72	853.5	853.5	853.5	853.5	853.5	853.5	853.5	853.5	853.5	853.5	0.75	0.92	0.96	0.76	0.93	0.73	0.9	0.89	0.97	0.9	0.53	0.47	0.72	0.62	0.91	0.64	0.53	0.82	0.58	0.8
70	1-Stearoyl-2-hydroxy-sn-glycero-3-phosphoethanolamine [M-H]- C23H48NO7P NIST 1151471---1-Stearoyl-2-hydroxy-sn-glycero-3-phosphoethanolamine [M-H]- C23H48NO7P NIST 1151472---1-Stearoyl-2-hydroxy-sn-glycero-3-phosphoethanolamine [M-H]- C23H48NO7P NIST 1151481---lysoPE 18:0; [M-H]-; PE(18:0/0:0) C23H48NO7P	MS2	M-H	480.397	853.52	0	0.45	0	0	0	0	0	0	0	0	853.5	853.5	853.5	853.5	853.5	853.5	853.5	853.5	853.5	853.5	0.75	0.92	0.96	0.76	0.93	0.73	0.9	0.89	0.97	0.9	0	0.52	0	0	0	0	0	0	0	0
70	1-Stearoyl-2-hydroxy-sn-glycero-3-phosphoethanolamine [M-H]- C23H48NO7P NIST 1151471---1-Stearoyl-2-hydroxy-sn-glycero-3-phosphoethanolamine [M-H]- C23H48NO7P NIST 1151472---1-Stearoyl-2-hydroxy-sn-glycero-3-phosphoethanolamine [M-H]- C23H48NO7P NIST 1151481---lysoPE 18:0; [M-H]-; PE(18:0/0:0) C23H48NO7P	MS2	M-H	196.037	853.52	0	0	0	0.58	0.86	1.29	0	0	0	0.72	853.5	853.5	853.5	853.5	853.5	853.5	853.5	853.5	853.5	853.5	0.75	0.92	0.96	0.76	0.93	0.73	0.9	0.89	0.97	0.9	0	0	0	0.36	0.25	0.33	0	0	0	0.6
70	1-Stearoyl-2-hydroxy-sn-glycero-3-phosphoethanolamine [M-H]- C23H48NO7P NIST 1151471---1-Stearoyl-2-hydroxy-sn-glycero-3-phosphoethanolamine [M-H]- C23H48NO7P NIST 1151472---1-Stearoyl-2-hydroxy-sn-glycero-3-phosphoethanolamine [M-H]- C23H48NO7P NIST 1151481---lysoPE 18:0; [M-H]-; PE(18:0/0:0) C23H48NO7P	MS2	M-H	140.011	853.52	0	0	0	0	0	0	0	0	0	0	853.5	853.5	853.5	853.5	853.5	853.5	853.5	853.5	853.5	853.5	0.75	0.92	0.96	0.76	0.93	0.73	0.9	0.89	0.97	0.9	0	0	0	0	0	0	0	0	0	0
71	lysoPE 20:4; [M-H]-; PE(20:4(5E,8E,11E,14E)/0:0) C25H44NO7P---lysoPE 20:4; [M-H]-; PE(20:4(5Z,8Z,11Z,14Z)/0:0) C25H44NO7P---lysoPE 20:4; [M-H]-; PE(20:4(7E,10E,13E,16E)/0:0) C25H44NO7P	MS1	M-H	500.275	798.39					12.99										798.4										0.72										0.7
71	lysoPE 20:4; [M-H]-; PE(20:4(5E,8E,11E,14E)/0:0) C25H44NO7P---lysoPE 20:4; [M-H]-; PE(20:4(5Z,8Z,11Z,14Z)/0:0) C25H44NO7P---lysoPE 20:4; [M-H]-; PE(20:4(7E,10E,13E,16E)/0:0) C25H44NO7P	MS2	M-H	303.232	798.39					4.91										798.4										0.72										0.7
71	lysoPE 20:4; [M-H]-; PE(20:4(5E,8E,11E,14E)/0:0) C25H44NO7P---lysoPE 20:4; [M-H]-; PE(20:4(5Z,8Z,11Z,14Z)/0:0) C25H44NO7P---lysoPE 20:4; [M-H]-; PE(20:4(7E,10E,13E,16E)/0:0) C25H44NO7P	MS2	M-H	500.28	798.39					8.5										798.4										0.72										0.79
71	lysoPE 20:4; [M-H]-; PE(20:4(5E,8E,11E,14E)/0:0) C25H44NO7P---lysoPE 20:4; [M-H]-; PE(20:4(5Z,8Z,11Z,14Z)/0:0) C25H44NO7P---lysoPE 20:4; [M-H]-; PE(20:4(7E,10E,13E,16E)/0:0) C25H44NO7P	MS2	M-H	500.176	798.39					0										798.4										0.72										0
71	lysoPE 20:4; [M-H]-; PE(20:4(5E,8E,11E,14E)/0:0) C25H44NO7P---lysoPE 20:4; [M-H]-; PE(20:4(5Z,8Z,11Z,14Z)/0:0) C25H44NO7P---lysoPE 20:4; [M-H]-; PE(20:4(7E,10E,13E,16E)/0:0) C25H44NO7P	MS2	M-H	259.244	798.39					0										798.4										0.72										0
71	lysoPE 20:4; [M-H]-; PE(20:4(5E,8E,11E,14E)/0:0) C25H44NO7P---lysoPE 20:4; [M-H]-; PE(20:4(5Z,8Z,11Z,14Z)/0:0) C25H44NO7P---lysoPE 20:4; [M-H]-; PE(20:4(7E,10E,13E,16E)/0:0) C25H44NO7P	MS2	M-H	259.251	798.39					0										798.4										0.72										0
71	lysoPE 20:4; [M-H]-; PE(20:4(5E,8E,11E,14E)/0:0) C25H44NO7P---lysoPE 20:4; [M-H]-; PE(20:4(5Z,8Z,11Z,14Z)/0:0) C25H44NO7P---lysoPE 20:4; [M-H]-; PE(20:4(7E,10E,13E,16E)/0:0) C25H44NO7P	MS2	M-H	59.0152	798.39					0										798.4										0.72										0
72	D-(+)-Raffinose; LC-ESI-QTOF; MS2; CE C18H32O16---Maltotriose C18H32O16---Maltotriose C18H32O16 MassBank 5167	MS1	M-H	503.159	67.44	87.77	127.28	186.44	141.9	144.17	107.3	49.67	110.69	182.01	181.62	66.7	70.1	66.7	66.7	66.7	66.7	66.7	66.7	66.7	66.7	0.99	0.6	0.9	0.92	0.84	0.86	0.73	0.81	0.94	0.92	0.65	0.54	0.82	0.72	0.73	0.75	0.59	0.79	0.84	0.88
72	D-(+)-Raffinose; LC-ESI-QTOF; MS2; CE C18H32O16---Maltotriose C18H32O16---Maltotriose C18H32O16 MassBank 5167	MS2	M-H	221.068	67.44	6.13	0	5.71	3.35	3.28	1.98	0	0.53	4.5	6.93	66.7	70.1	66.7	66.7	66.7	66.7	66.7	66.7	66.7	66.7	0.99	0.6	0.9	0.92	0.84	0.86	0.73	0.81	0.94	0.92	0.65	0	0.44	0.72	0.61	0.58	0	0.54	0.77	0.81
72	D-(+)-Raffinose; LC-ESI-QTOF; MS2; CE C18H32O16---Maltotriose C18H32O16---Maltotriose C18H32O16 MassBank 5167	MS2	M-H	161.047	67.44	4.98	6.36	8.74	8.16	9.07	5.32	3.45	2.92	6.81	9.47	66.7	70.1	66.7	66.7	66.7	66.7	66.7	66.7	66.7	66.7	0.99	0.6	0.9	0.92	0.84	0.86	0.73	0.81	0.94	0.92	0.69	0.54	0.87	0.97	0.73	0.83	0.72	0.91	0.84	0.88
72	D-(+)-Raffinose; LC-ESI-QTOF; MS2; CE C18H32O16---Maltotriose C18H32O16---Maltotriose C18H32O16 MassBank 5167	MS2	M-H	101.026	67.44	1.18	0	3.5	1.55	1.5	1.6	0	1.85	2.58	2.17	66.7	70.1	66.7	66.7	66.7	66.7	66.7	66.7	66.7	66.7	0.99	0.6	0.9	0.92	0.84	0.86	0.73	0.81	0.94	0.92	0.58	0	0.82	0.72	0.62	0.75	0	0.79	0.77	0.89
72	D-(+)-Raffinose; LC-ESI-QTOF; MS2; CE C18H32O16---Maltotriose C18H32O16---Maltotriose C18H32O16 MassBank 5167	MS2	M-H	383.118	67.44	1.1	4.42	3.72	1.41	4.83	2.9	0.6	0	4.92	8.29	66.7	70.1	66.7	66.7	66.7	66.7	66.7	66.7	66.7	66.7	0.99	0.6	0.9	0.92	0.84	0.86	0.73	0.81	0.94	0.92	0.57	0.74	0.73	0.62	0.77	0.55	0.49	0	0.87	0.81
72	D-(+)-Raffinose; LC-ESI-QTOF; MS2; CE C18H32O16---Maltotriose C18H32O16---Maltotriose C18H32O16 MassBank 5167	MS2	M-H	71.0137	67.44	0.78	0	0	0	0	0	0.26	0	0.43	0.35	66.7	70.1	66.7	66.7	66.7	66.7	66.7	66.7	66.7	66.7	0.99	0.6	0.9	0.92	0.84	0.86	0.73	0.81	0.94	0.92	0.53	0	0	0	0	0	0.59	0	0.58	0.69
72	D-(+)-Raffinose; LC-ESI-QTOF; MS2; CE C18H32O16---Maltotriose C18H32O16---Maltotriose C18H32O16 MassBank 5167	MS2	M-H	89.0254	67.44	0.39	0	2.3	0.68	2.4	1.07	0.46	0.53	1.33	0.29	66.7	70.1	66.7	66.7	66.7	66.7	66.7	66.7	66.7	66.7	0.99	0.6	0.9	0.92	0.84	0.86	0.73	0.81	0.94	0.92	0.53	0	0.33	0.48	0.02	0.56	0.54	0.5	0.24	0.24
72	ISF of D-(+)-Raffinose; LC-ESI-QTOF; MS2; CE C18H32O16---Maltotriose C18H32O16---Maltotriose C18H32O16 MassBank 5167	MS1	-	341.108	66.35	433.81	933.33	640.8	844.71	820.82	243.67	285.32				64.5	64.5	64.5	66.7	65.6	66.7	65.6				0.87	0.9	0.93	0.94	0.94	0.92	0.94				0.59	0.8	0.53	0.59	0.61	0.76	0.7
72	ISF of D-(+)-Raffinose; LC-ESI-QTOF; MS2; CE C18H32O16---Maltotriose C18H32O16---Maltotriose C18H32O16 MassBank 5167	MS2	-	59.014	66.35	14.01	14.59	13.48	16.44	14.55	6.18	7.56				64.5	64.5	64.5	66.7	65.6	66.7	65.6				0.87	0.9	0.93	0.94	0.94	0.92	0.94				0.58	0.8	0.49	0.59	0.61	0.74	0.54
72	ISF of D-(+)-Raffinose; LC-ESI-QTOF; MS2; CE C18H32O16---Maltotriose C18H32O16---Maltotriose C18H32O16 MassBank 5167	MS2	-	119.035	66.35	13.44	17.47	17.67	13.99	19.38	6.59	6.68				64.5	64.5	64.5	66.7	65.6	66.7	65.6				0.87	0.9	0.93	0.94	0.94	0.92	0.94				0.59	0.78	0.32	0.45	0.33	0.72	0.48
72	ISF of D-(+)-Raffinose; LC-ESI-QTOF; MS2; CE C18H32O16---Maltotriose C18H32O16---Maltotriose C18H32O16 MassBank 5167	MS2	-	89.0254	66.35	23.72	32.88	33.5	39.3	42.9	7.89	11.75				64.5	64.5	64.5	66.7	65.6	66.7	65.6				0.87	0.9	0.93	0.94	0.94	0.92	0.94				0.32	0.55	0.28	0.18	0.18	0.52	0.3
72	ISF of D-(+)-Raffinose; LC-ESI-QTOF; MS2; CE C18H32O16---Maltotriose C18H32O16---Maltotriose C18H32O16 MassBank 5167	MS2	-	341.106	66.35	0	1.89	9.5	15.82	12.89	11.96	1.9				64.5	64.5	64.5	66.7	65.6	66.7	65.6				0.87	0.9	0.93	0.94	0.94	0.92	0.94				0	0.45	0.54	0.9	0.76	0.65	0.6
72	ISF of D-(+)-Raffinose; LC-ESI-QTOF; MS2; CE C18H32O16---Maltotriose C18H32O16---Maltotriose C18H32O16 MassBank 5167	MS2	-	179.056	66.35	23.03	28.51	21.16	14.73	25.62	10.47	10.53				64.5	64.5	64.5	66.7	65.6	66.7	65.6				0.87	0.9	0.93	0.94	0.94	0.92	0.94				0.46	0.78	0.46	0.53	0.35	0.91	0.7
72	ISF of D-(+)-Raffinose; LC-ESI-QTOF; MS2; CE C18H32O16---Maltotriose C18H32O16---Maltotriose C18H32O16 MassBank 5167	MS2	-	101.025	66.35	9.28	14.65	12.96	6.88	9.52	4.73	4.28				64.5	64.5	64.5	66.7	65.6	66.7	65.6				0.87	0.9	0.93	0.94	0.94	0.92	0.94				0.89	0.85	0.53	0.39	0.46	0.76	0.76
73	Adenosine 5'-triphosphate [M-H]- C10H16N5O13P3 NIST 1162433	MS1	M-H	505.985	68.19									164.7										68.9										0.96										0.88
73	Adenosine 5'-triphosphate [M-H]- C10H16N5O13P3 NIST 1162433	MS2	M-H	505.986	68.19									58.03										68.9										0.96										0.88
73	Adenosine 5'-triphosphate [M-H]- C10H16N5O13P3 NIST 1162433	MS2	M-H	158.925	68.19									40.95										68.9										0.96										0.96
73	Adenosine 5'-triphosphate [M-H]- C10H16N5O13P3 NIST 1162433	MS2	M-H	408.009	68.19									20.71										68.9										0.96										0.82
73	Adenosine 5'-triphosphate [M-H]- C10H16N5O13P3 NIST 1162433	MS2	M-H	328.039	68.19									4.83										68.9										0.96										0.47
73	Adenosine 5'-triphosphate [M-H]- C10H16N5O13P3 NIST 1162433	MS2	M-H	174.982	68.19									0										68.9										0.96										0
73	Adenosine 5'-triphosphate [M-H]- C10H16N5O13P3 NIST 1162433	MS2	M-H	272.956	68.19									8.22										68.9										0.96										0.65
74	Taurocholic acid [M-H]- C26H45NO7S NIST 1076865	MS1	M-H	514.281	654.53	687.39	128.47	184.77	375.08	461.21	67.93	73.64	906.47	826.13	302.3	653.9	655	655	653.9	653.9	653.9	653.9	653.9	653.9	653.9	0.9	0.93	0.92	0.89	0.9	0.92	0.94	0.89	0.89	0.9	0.97	0.96	0.8	0.97	0.82	0.92	0.74	0.97	0.86	0.96
74	Taurocholic acid [M-H]- C26H45NO7S NIST 1076865	MS2	M-H	514.283	654.53	1541.96	250.25	348.84	770.03	903.07	116.48	121.15	1858.14	1695.91	569.26	653.9	655	655	653.9	653.9	653.9	653.9	653.9	653.9	653.9	0.9	0.93	0.92	0.89	0.9	0.92	0.94	0.89	0.89	0.9	0.97	0.96	0.96	0.97	0.97	0.97	0.95	0.97	0.98	0.98
74	Taurocholic acid [M-H]- C26H45NO7S NIST 1076865	MS2	M-H	512.684	654.53	4.94	0	0	0.81	1.04	0	0	1.04	3.7	0.7	653.9	655	655	653.9	653.9	653.9	653.9	653.9	653.9	653.9	0.9	0.93	0.92	0.89	0.9	0.92	0.94	0.89	0.89	0.9	0.73	0	0	0.75	0.51	0	0	0.54	0.58	0.52
74	Taurocholic acid [M-H]- C26H45NO7S NIST 1076865	MS2	M-H	124.007	654.53	0	0	0	0	0	0	0	0	0	0	653.9	655	655	653.9	653.9	653.9	653.9	653.9	653.9	653.9	0.9	0.93	0.92	0.89	0.9	0.92	0.94	0.89	0.89	0.9	0	0	0	0	0	0	0	0	0	0
74	Taurocholic acid [M-H]- C26H45NO7S NIST 1076865	MS2	M-H	515.285	654.53	402.12	51.72	64.5	211.76	189.99	23.32	21.82	543.58	403.64	146.92	653.9	655	655	653.9	653.9	653.9	653.9	653.9	653.9	653.9	0.9	0.93	0.92	0.89	0.9	0.92	0.94	0.89	0.89	0.9	0.97	0.96	0.8	0.97	0.82	0.92	0.74	0.97	0.86	0.96
74	Taurocholic acid [M-H]- C26H45NO7S NIST 1076865	MS2	M-H	516.026	654.53	0	0	0	0	0	0	0	0	0	0	653.9	655	655	653.9	653.9	653.9	653.9	653.9	653.9	653.9	0.9	0.93	0.92	0.89	0.9	0.92	0.94	0.89	0.89	0.9	0	0	0	0	0	0	0	0	0	0
74	Taurocholic acid [M-H]- C26H45NO7S NIST 1076865	MS2	M-H	514.126	654.53	0	0	0	0	0	0	0	0	0	0	653.9	655	655	653.9	653.9	653.9	653.9	653.9	653.9	653.9	0.9	0.93	0.92	0.89	0.9	0.92	0.94	0.89	0.89	0.9	0	0	0	0	0	0	0	0	0	0
75	LPS 18:0; [M-H]- C24H48NO9P	MS1	M-H	524.296	831.13	16.41			18.43	17.47	16.08		18.72	15.96		831.1			831.1	831.1	831.1		831.1	831.1		0.83			0.92	0.9	0.89		0.88	0.86		0.52			0.56	0.65	0.63		0.62	0.74
75	LPS 18:0; [M-H]- C24H48NO9P	MS2	M-H	152.996	831.13	3.61			4.38	4.32	3.87		2.79	4.44		831.1			831.1	831.1	831.1		831.1	831.1		0.83			0.92	0.9	0.89		0.88	0.86		0.52			0.76	0.78	0.68		0.62	0.83
75	LPS 18:0; [M-H]- C24H48NO9P	MS2	M-H	437.267	831.13	1.5			2.68	2.15	4.29		1.07	1.72		831.1			831.1	831.1	831.1		831.1	831.1		0.83			0.92	0.9	0.89		0.88	0.86		0.2			0.39	0.36	0.63		0.54	0.28
75	LPS 18:0; [M-H]- C24H48NO9P	MS2	M-H	524.3	831.13	5.88			5.52	4.71	1.41		6.11	3.17		831.1			831.1	831.1	831.1		831.1	831.1		0.83			0.92	0.9	0.89		0.88	0.86		0.56			0.56	0.65	0.42		0.62	0.74
75	LPS 18:0; [M-H]- C24H48NO9P	MS2	M-H	464.308	831.13	0			0.66	0	0		0	0		831.1			831.1	831.1	831.1		831.1	831.1		0.83			0.92	0.9	0.89		0.88	0.86		0			0.36	0	0		0	0
75	LPS 18:0; [M-H]- C24H48NO9P	MS2	M-H	524.452	831.13	0			0	0	0		0	0		831.1			831.1	831.1	831.1		831.1	831.1		0.83			0.92	0.9	0.89		0.88	0.86		0			0	0	0		0	0
75	LPS 18:0; [M-H]- C24H48NO9P	MS2	M-H	78.959	831.13	0			0	0	0		0	0		831.1			831.1	831.1	831.1		831.1	831.1		0.83			0.92	0.9	0.89		0.88	0.86		0			0	0	0		0	0
76	LPC 16:0; [M+FA-H]- C24H50NO7P	MS1	M+HCOO	540.328	819.56	41.92	43.87	39.88	35.53	47.22	40.16	45.99	37.88	35.34	40.19	819.3	820.4	819.3	819.3	819.3	819.3	819.3	819.3	819.3	819.3	0.9	0.86	0.84	0.84	0.88	0.81	0.91	0.88	0.84	0.89	0.92	0.84	0.79	0.68	0.95	0.78	0.92	0.88	0.93	0.78
76	LPC 16:0; [M+FA-H]- C24H50NO7P	MS2	M+HCOO	255.232	819.56	21.4	15.33	14	13.7	15.06	14.48	16	12.6	14.86	17.1	819.3	820.4	819.3	819.3	819.3	819.3	819.3	819.3	819.3	819.3	0.9	0.86	0.84	0.84	0.88	0.81	0.91	0.88	0.84	0.89	0.96	0.92	0.95	0.94	0.96	0.93	0.88	0.88	0.93	0.96
76	LPC 16:0; [M+FA-H]- C24H50NO7P	MS2	M+HCOO	480.305	819.56	27.71	18.83	15.94	7.59	16.86	8.5	29.59	15.74	16.08	14.1	819.3	820.4	819.3	819.3	819.3	819.3	819.3	819.3	819.3	819.3	0.9	0.86	0.84	0.84	0.88	0.81	0.91	0.88	0.84	0.89	0.9	0.56	0.47	0.4	0.84	0.62	0.97	0.78	0.93	0.78
76	LPC 16:0; [M+FA-H]- C24H50NO7P	MS2	M+HCOO	224.069	819.56	1.53	1.76	1.91	0.46	1.85	1.76	0.92	0	0	0.46	819.3	820.4	819.3	819.3	819.3	819.3	819.3	819.3	819.3	819.3	0.9	0.86	0.84	0.84	0.88	0.81	0.91	0.88	0.84	0.89	0.77	0.62	0.45	0.64	0.56	0.73	0.78	0	0	0.59
76	LPC 16:0; [M+FA-H]- C24H50NO7P	MS2	M+HCOO	540.335	819.56	13.19	11.25	11.48	8.09	11.7	14.58	10.68	11.31	13.14	11.24	819.3	820.4	819.3	819.3	819.3	819.3	819.3	819.3	819.3	819.3	0.9	0.86	0.84	0.84	0.88	0.81	0.91	0.88	0.84	0.89	0.92	0.84	0.79	0.68	0.95	0.78	0.92	0.96	0.98	0.66
76	LPC 16:0; [M+FA-H]- C24H50NO7P	MS2	M+HCOO	279.529	819.56	0	0	0	0	0	0	0	0.69	0	0	819.3	820.4	819.3	819.3	819.3	819.3	819.3	819.3	819.3	819.3	0.9	0.86	0.84	0.84	0.88	0.81	0.91	0.88	0.84	0.89	0	0	0	0	0	0	0	0.52	0	0
76	LPC 16:0; [M+FA-H]- C24H50NO7P	MS2	M+HCOO	152.995	819.56	0	0	0	0	0	0	0	0	0	0	819.3	820.4	819.3	819.3	819.3	819.3	819.3	819.3	819.3	819.3	0.9	0.86	0.84	0.84	0.88	0.81	0.91	0.88	0.84	0.89	0	0	0	0	0	0	0	0	0	0
77	Maltotriose C18H32O16---Maltotriose; LC-ESI-QTOF; MS2; CE C18H32O16---Unknown (carbon number 25); PlaSMA ID-1397 C25H28O11	MS1	M+HCOO	549.165	67.44	174.32	150.92	354.03	290.56	284.71	201.98	93.97	228.73	349.99	357.97	66.7	67.8	66.7	66.7	66.7	66.7	66.7	66.7	66.7	66.7	0.98	0.98	0.98	0.97	0.98	0.98	0.97	0.98	0.94	0.97	0.84	0.95	0.98	0.97	0.95	0.96	0.96	0.97	0.97	0.92
77	Maltotriose C18H32O16---Maltotriose; LC-ESI-QTOF; MS2; CE C18H32O16---Unknown (carbon number 25); PlaSMA ID-1397 C25H28O11	MS2	M+HCOO	161.045	67.44	49.17	19.33	75.63	67.82	61.69	38.59	17.92	52.77	68.74	70.26	66.7	67.8	66.7	66.7	66.7	66.7	66.7	66.7	66.7	66.7	0.98	0.98	0.98	0.97	0.98	0.98	0.97	0.98	0.94	0.97	0.81	0.97	0.98	0.97	0.97	0.95	0.98	0.98	0.94	0.88
77	Maltotriose C18H32O16---Maltotriose; LC-ESI-QTOF; MS2; CE C18H32O16---Unknown (carbon number 25); PlaSMA ID-1397 C25H28O11	MS2	M+HCOO	383.118	67.44	34.25	32.07	56.58	40.5	43.07	35.62	16.08	40.32	45.33	59.3	66.7	67.8	66.7	66.7	66.7	66.7	66.7	66.7	66.7	66.7	0.98	0.98	0.98	0.97	0.98	0.98	0.97	0.98	0.94	0.97	0.89	0.85	0.96	0.97	0.95	0.96	0.87	0.96	0.97	0.82
77	Maltotriose C18H32O16---Maltotriose; LC-ESI-QTOF; MS2; CE C18H32O16---Unknown (carbon number 25); PlaSMA ID-1397 C25H28O11	MS2	M+HCOO	179.056	67.44	16.63	28.86	29.46	30.09	29.73	17.99	11.16	16.2	27.84	26.86	66.7	67.8	66.7	66.7	66.7	66.7	66.7	66.7	66.7	66.7	0.98	0.98	0.98	0.97	0.98	0.98	0.97	0.98	0.94	0.97	0.84	0.95	0.98	0.96	0.94	0.96	0.92	0.96	0.97	0.91
77	Maltotriose C18H32O16---Maltotriose; LC-ESI-QTOF; MS2; CE C18H32O16---Unknown (carbon number 25); PlaSMA ID-1397 C25H28O11	MS2	M+HCOO	221.067	67.44	11.96	20.32	20.44	19.67	18.37	13.26	8.23	16.13	18.12	19.17	66.7	67.8	66.7	66.7	66.7	66.7	66.7	66.7	66.7	66.7	0.98	0.98	0.98	0.97	0.98	0.98	0.97	0.98	0.94	0.97	0.81	0.91	0.96	0.96	0.94	0.96	0.9	0.87	0.94	0.91
77	Maltotriose C18H32O16---Maltotriose; LC-ESI-QTOF; MS2; CE C18H32O16---Unknown (carbon number 25); PlaSMA ID-1397 C25H28O11	MS2	M+HCOO	101.025	67.44	9.62	6.28	12.63	8.13	11.7	7.08	4.62	10.68	9.71	9.78	66.7	67.8	66.7	66.7	66.7	66.7	66.7	66.7	66.7	66.7	0.98	0.98	0.98	0.97	0.98	0.98	0.97	0.98	0.94	0.97	0.73	0.83	0.95	0.92	0.86	0.95	0.96	0.97	0.93	0.93
77	Maltotriose C18H32O16---Maltotriose; LC-ESI-QTOF; MS2; CE C18H32O16---Unknown (carbon number 25); PlaSMA ID-1397 C25H28O11	MS2	M+HCOO	341.108	67.44	22.02	12.82	39.36	34.2	26.8	15.23	5.66	24.8	44.19	36.89	66.7	67.8	66.7	66.7	66.7	66.7	66.7	66.7	66.7	66.7	0.98	0.98	0.98	0.97	0.98	0.98	0.97	0.98	0.94	0.97	0.81	0.68	0.97	0.92	0.94	0.85	0.72	0.95	0.86	0.92
78	Adenosine 5'-diphosphoribose [M-H]- C15H23N5O14P2 NIST 1068491	MS1	M-H	558.061	56.92		18.95	314.23	105.78	341	119.69	165.44	51.03	1559.1	425.33		56.7	56.7	56.9	56.7	57.8	57.8	56.7	56.7	57.8		0.92	0.99	0.95	0.98	0.84	0.97	0.91	0.99	1		0.61	0.78	0.69	0.96	0.66	0.91	0.83	0.95	0.92
78	Adenosine 5'-diphosphoribose [M-H]- C15H23N5O14P2 NIST 1068491	MS2	M-H	558.062	56.92		12.86	283.85	58.68	275.71	50.22	116.17	26.09	1451.42	321.99		56.7	56.7	56.9	56.7	57.8	57.8	56.7	56.7	57.8		0.92	0.99	0.95	0.98	0.84	0.97	0.91	0.99	1		0.81	0.85	0.92	0.96	0.6	0.93	0.83	0.99	0.97
78	Adenosine 5'-diphosphoribose [M-H]- C15H23N5O14P2 NIST 1068491	MS2	M-H	460.083	56.92		0.88	10.69	1.76	17.92	3.51	10.97	0	84.06	24.08		56.7	56.7	56.9	56.7	57.8	57.8	56.7	56.7	57.8		0.92	0.99	0.95	0.98	0.84	0.97	0.91	0.99	1		0.49	0.62	0.32	0.89	0.66	0.84	0	0.95	0.72
78	Adenosine 5'-diphosphoribose [M-H]- C15H23N5O14P2 NIST 1068491	MS2	M-H	486.043	56.92		0	8.79	2.72	11.03	0	3.62	0	34.81	10.54		56.7	56.7	56.9	56.7	57.8	57.8	56.7	56.7	57.8		0.92	0.99	0.95	0.98	0.84	0.97	0.91	0.99	1		0	0.65	0.41	0.7	0	0.65	0	0.85	0.69
78	Adenosine 5'-diphosphoribose [M-H]- C15H23N5O14P2 NIST 1068491	MS2	M-H	442.075	56.92		0	7.72	0	3.23	0	0	0	15.84	8.36		56.7	56.7	56.9	56.7	57.8	57.8	56.7	56.7	57.8		0.92	0.99	0.95	0.98	0.84	0.97	0.91	0.99	1		0	0.63	0	0.57	0	0	0	0.7	0.92
78	Adenosine 5'-diphosphoribose [M-H]- C15H23N5O14P2 NIST 1068491	MS2	M-H	406.074	56.92		0	3.4	0	0	0	1.34	0	33.98	15.01		56.7	56.7	56.9	56.7	57.8	57.8	56.7	56.7	57.8		0.92	0.99	0.95	0.98	0.84	0.97	0.91	0.99	1		0	0.54	0	0	0	0.57	0	0.92	0.85
78	Adenosine 5'-diphosphoribose [M-H]- C15H23N5O14P2 NIST 1068491	MS2	M-H	96.9694	56.92		1.26	6.43	3.62	9.38	1.31	4.13	1.16	30	7.54		56.7	56.7	56.9	56.7	57.8	57.8	56.7	56.7	57.8		0.92	0.99	0.95	0.98	0.84	0.97	0.91	0.99	1		0.61	0.78	0.69	0.96	0.8	0.91	0.92	0.94	0.9
79	Adenosine 5'-diphosphoribose [M-H]- C15H23N5O14P2 NIST 1068483---Adenosine 5'-diphosphoribose [M-H]- C15H23N5O14P2 NIST 1068484	MS1	M-H	558.062	72.76	46.63	99.12	129.94	151.62	237.11	57.2	149.1	94.88	1618.09	405.01	73.4	72.3	72.3	73.4	72.3	72.3	72.8	72.3	72.8	72.8	0.99	0.99	0.98	0.99	1	0.99	0.98	0.99	0.98	0.99	0.88	0.95	0.93	0.96	0.96	0.87	0.76	0.93	0.92	0.9
79	Adenosine 5'-diphosphoribose [M-H]- C15H23N5O14P2 NIST 1068483---Adenosine 5'-diphosphoribose [M-H]- C15H23N5O14P2 NIST 1068484	MS2	M-H	346.055	72.76	67.72	73.71	76.99	118.27	244.71	38.77	43.66	55.35	631.05	165.13	73.4	72.3	72.3	73.4	72.3	72.3	72.8	72.3	72.8	72.8	0.99	0.99	0.98	0.99	1	0.99	0.98	0.99	0.98	0.99	0.93	0.95	0.97	0.98	0.98	0.98	0.67	0.92	0.81	0.76
79	Adenosine 5'-diphosphoribose [M-H]- C15H23N5O14P2 NIST 1068483---Adenosine 5'-diphosphoribose [M-H]- C15H23N5O14P2 NIST 1068484	MS2	M-H	558.063	72.76	34.09	55.56	63.98	99.85	185.35	33.22	82.01	66.75	1266.49	289.89	73.4	72.3	72.3	73.4	72.3	72.3	72.8	72.3	72.8	72.8	0.99	0.99	0.98	0.99	1	0.99	0.98	0.99	0.98	0.99	0.88	0.96	0.83	0.96	0.94	0.87	0.92	0.96	0.95	0.96
79	Adenosine 5'-diphosphoribose [M-H]- C15H23N5O14P2 NIST 1068483---Adenosine 5'-diphosphoribose [M-H]- C15H23N5O14P2 NIST 1068484	MS2	M-H	408.008	72.76	3.92	4.36	4.45	5.69	12.55	3.08	0.83	1.87	46.13	13.86	73.4	72.3	72.3	73.4	72.3	72.3	72.8	72.3	72.8	72.8	0.99	0.99	0.98	0.99	1	0.99	0.98	0.99	0.98	0.99	0.81	0.71	0.8	0.89	0.87	0.44	0.19	0.52	0.83	0.75
79	Adenosine 5'-diphosphoribose [M-H]- C15H23N5O14P2 NIST 1068483---Adenosine 5'-diphosphoribose [M-H]- C15H23N5O14P2 NIST 1068484	MS2	M-H	78.9581	72.76	2.22	1.68	3.32	2.99	6.84	0.96	2.73	2.1	21.3	6.06	73.4	72.3	72.3	73.4	72.3	72.3	72.8	72.3	72.8	72.8	0.99	0.99	0.98	0.99	1	0.99	0.98	0.99	0.98	0.99	0.85	0.7	0.93	0.72	0.92	0.65	0.76	0.86	0.92	0.9
79	Adenosine 5'-diphosphoribose [M-H]- C15H23N5O14P2 NIST 1068483---Adenosine 5'-diphosphoribose [M-H]- C15H23N5O14P2 NIST 1068484	MS2	M-H	272.955	72.76	0	1.27	0	5.08	2.96	2.04	1.36	1.19	17.49	4.15	73.4	72.3	72.3	73.4	72.3	72.3	72.8	72.3	72.8	72.8	0.99	0.99	0.98	0.99	1	0.99	0.98	0.99	0.98	0.99	0	0.48	0	0.86	0.77	0.85	0.63	0.59	0.92	0.78
79	Adenosine 5'-diphosphoribose [M-H]- C15H23N5O14P2 NIST 1068483---Adenosine 5'-diphosphoribose [M-H]- C15H23N5O14P2 NIST 1068484	MS2	M-H	211.002	72.76	2.08	3.35	2.46	4.46	8.67	0.45	2.16	2.69	38.98	12	73.4	72.3	72.3	73.4	72.3	72.3	72.8	72.3	72.8	72.8	0.99	0.99	0.98	0.99	1	0.99	0.98	0.99	0.98	0.99	0.6	0.81	0.79	0.86	0.96	0.44	0.51	0.93	0.92	0.74
80	LPC 18:3; [M+FA-H]- C26H48NO7P	MS1	M+HCOO	562.312	780.09		7.31			9.17							780.1			780.1							0.82			0.88							0.7			0.75
80	LPC 18:3; [M+FA-H]- C26H48NO7P	MS2	M+HCOO	277.216	780.09		3.08			6.81							780.1			780.1							0.82			0.88							0.7			0.75
80	LPC 18:3; [M+FA-H]- C26H48NO7P	MS2	M+HCOO	502.293	780.09		2.3			1.38							780.1			780.1							0.82			0.88							0.81			0.78
80	LPC 18:3; [M+FA-H]- C26H48NO7P	MS2	M+HCOO	562.316	780.09		1.46			0.97							780.1			780.1							0.82			0.88							0.54			0.46
80	LPC 18:3; [M+FA-H]- C26H48NO7P	MS2	M+HCOO	562.872	780.09		0			0							780.1			780.1							0.82			0.88							0			0
80	LPC 18:3; [M+FA-H]- C26H48NO7P	MS2	M+HCOO	248.976	780.09		6.64			7.62							780.1			780.1							0.82			0.88							0.34			0.31
80	LPC 18:3; [M+FA-H]- C26H48NO7P	MS2	M+HCOO	219.756	780.09		0			0							780.1			780.1							0.82			0.88							0			0
81	LPC 18:2; [M+FA-H]- C26H50NO7P	MS1	M+HCOO	564.328	797.26	33.05	129.14	27.47	17.51	131.58						797.1	797.1	797.3	797.3	797.1						0.92	0.91	0.93	0.82	0.91						0.87	0.95	0.62	0.75	0.93
81	LPC 18:2; [M+FA-H]- C26H50NO7P	MS2	M+HCOO	279.232	797.26	15.82	71.24	15.27	11.27	75.52						797.1	797.1	797.3	797.3	797.1						0.92	0.91	0.93	0.82	0.91						0.94	0.97	0.92	0.85	0.95
81	LPC 18:2; [M+FA-H]- C26H50NO7P	MS2	M+HCOO	504.307	797.26	15.39	58.98	7.67	11.82	63.81						797.1	797.1	797.3	797.3	797.1						0.92	0.91	0.93	0.82	0.91						0.87	0.92	0.57	0.75	0.93
81	LPC 18:2; [M+FA-H]- C26H50NO7P	MS2	M+HCOO	242.081	797.26	0	1.11	0.32	0	0.96						797.1	797.1	797.3	797.3	797.1						0.92	0.91	0.93	0.82	0.91						0	0.55	0.62	0	0.68
81	LPC 18:2; [M+FA-H]- C26H50NO7P	MS2	M+HCOO	564.326	797.26	4.37	31.77	2.31	6.93	26.06						797.1	797.1	797.3	797.3	797.1						0.92	0.91	0.93	0.82	0.91						0.42	0.95	0.6	0.68	0.6
81	LPC 18:2; [M+FA-H]- C26H50NO7P	MS2	M+HCOO	224.07	797.26	0	0	0.31	0	0						797.1	797.1	797.3	797.3	797.1						0.92	0.91	0.93	0.82	0.91						0	0	0.51	0	0
81	LPC 18:2; [M+FA-H]- C26H50NO7P	MS2	M+HCOO	564.502	797.26	0	0	0	2.19	0						797.1	797.1	797.3	797.3	797.1						0.92	0.91	0.93	0.82	0.91						0	0	0	0.29	0
82	Uridine 5'-diphosphogalactose [M-H]- C15H24N2O17P2 NIST 1174031---Uridine 5'-diphosphogalactose [M-H]- C15H24N2O17P2 NIST 1174032	MS1	M-H	565.045	56.89	104.06	45.9	160.75	393	688.1	48.32	67.89	30.34	1367.64	272.33	56.7	56.7	56.7	56.7	56.7	56.7	56.7	56.7	56.7	56.7	1	0.95	1	0.99	0.99	0.98	0.98	0.96	0.99	1	0.88	0.91	0.88	0.96	0.95	0.87	0.93	0.92	0.97	0.96
82	Uridine 5'-diphosphogalactose [M-H]- C15H24N2O17P2 NIST 1174031---Uridine 5'-diphosphogalactose [M-H]- C15H24N2O17P2 NIST 1174032	MS2	M-H	323.028	56.89	58.79	20.87	103.42	197.77	336.33	27.11	29.52	15.46	786.85	141.72	56.7	56.7	56.7	56.7	56.7	56.7	56.7	56.7	56.7	56.7	1	0.95	1	0.99	0.99	0.98	0.98	0.96	0.99	1	0.88	0.91	0.88	0.95	0.93	0.89	0.97	0.95	0.96	0.96
82	Uridine 5'-diphosphogalactose [M-H]- C15H24N2O17P2 NIST 1174031---Uridine 5'-diphosphogalactose [M-H]- C15H24N2O17P2 NIST 1174032	MS2	M-H	565.046	56.89	75.28	30.07	131.63	251.26	496.96	30.76	43	22.28	1086.34	173.26	56.7	56.7	56.7	56.7	56.7	56.7	56.7	56.7	56.7	56.7	1	0.95	1	0.99	0.99	0.98	0.98	0.96	0.99	1	0.9	0.93	0.91	0.94	0.95	0.87	0.93	0.92	0.97	0.96
82	Uridine 5'-diphosphogalactose [M-H]- C15H24N2O17P2 NIST 1174031---Uridine 5'-diphosphogalactose [M-H]- C15H24N2O17P2 NIST 1174032	MS2	M-H	384.982	56.89	2.92	0	10.32	18.57	38.26	0.8	1.91	1.81	76.22	14.31	56.7	56.7	56.7	56.7	56.7	56.7	56.7	56.7	56.7	56.7	1	0.95	1	0.99	0.99	0.98	0.98	0.96	0.99	1	0.57	0	0.77	0.96	0.94	0.43	0.43	0.88	0.94	0.91
82	Uridine 5'-diphosphogalactose [M-H]- C15H24N2O17P2 NIST 1174031---Uridine 5'-diphosphogalactose [M-H]- C15H24N2O17P2 NIST 1174032	MS2	M-H	241.011	56.89	4.29	0.96	6.81	14.08	18.52	1.28	2.7	0	44.99	10.59	56.7	56.7	56.7	56.7	56.7	56.7	56.7	56.7	56.7	56.7	1	0.95	1	0.99	0.99	0.98	0.98	0.96	0.99	1	0.88	0.65	0.77	0.96	0.96	0.56	0.68	0	0.93	0.94
82	Uridine 5'-diphosphogalactose [M-H]- C15H24N2O17P2 NIST 1174031---Uridine 5'-diphosphogalactose [M-H]- C15H24N2O17P2 NIST 1174032	MS2	M-H	402.993	56.89	1.44	0.21	2.27	1.03	11.95	0	0.21	0	23.62	3.06	56.7	56.7	56.7	56.7	56.7	56.7	56.7	56.7	56.7	56.7	1	0.95	1	0.99	0.99	0.98	0.98	0.96	0.99	1	0.87	0.51	0.76	0.47	0.9	0	0.46	0	0.97	0.52
82	Uridine 5'-diphosphogalactose [M-H]- C15H24N2O17P2 NIST 1174031---Uridine 5'-diphosphogalactose [M-H]- C15H24N2O17P2 NIST 1174032	MS2	M-H	272.957	56.89	1.87	0	5.33	5.64	7.98	0.17	0	0	21.29	4.9	56.7	56.7	56.7	56.7	56.7	56.7	56.7	56.7	56.7	56.7	1	0.95	1	0.99	0.99	0.98	0.98	0.96	0.99	1	0.52	0	0.87	0.96	0.89	0.71	0	0	0.92	0.81
83	LPC 18:0; [M+FA-H]- C26H54NO7P	MS1	M+HCOO	568.36	852.42	28.57	27.2	32.23	29.2	29.8	30.06	32.23	30.34	26.51	32.68	852.4	852.4	852.4	852.4	852.4	852.4	852.4	852.4	852.4	852.4	0.89	0.95	0.96	0.94	0.95	0.94	0.92	0.96	0.92	0.92	0.82	0.76	0.66	0.84	0.72	0.69	0.79	0.9	0.62	0.77
83	LPC 18:0; [M+FA-H]- C26H54NO7P	MS2	M+HCOO	283.263	852.42	9.91	16.08	14.21	13.09	18.51	13.25	16.63	16.09	13.69	18.69	852.4	852.4	852.4	852.4	852.4	852.4	852.4	852.4	852.4	852.4	0.89	0.95	0.96	0.94	0.95	0.94	0.92	0.96	0.92	0.92	0.82	0.76	0.66	0.89	0.77	0.88	0.79	0.9	0.62	0.77
83	LPC 18:0; [M+FA-H]- C26H54NO7P	MS2	M+HCOO	508.339	852.42	14.39	17.74	15.3	16.79	12.67	15.87	20.9	17.45	25.4	17.44	852.4	852.4	852.4	852.4	852.4	852.4	852.4	852.4	852.4	852.4	0.89	0.95	0.96	0.94	0.95	0.94	0.92	0.96	0.92	0.92	0.88	0.89	0.71	0.84	0.72	0.69	0.95	0.9	0.92	0.9
83	LPC 18:0; [M+FA-H]- C26H54NO7P	MS2	M+HCOO	224.07	852.42	0	0	0.62	0.92	0	0	0	0.62	1.23	0.15	852.4	852.4	852.4	852.4	852.4	852.4	852.4	852.4	852.4	852.4	0.89	0.95	0.96	0.94	0.95	0.94	0.92	0.96	0.92	0.92	0	0	0.59	0.58	0	0	0	0.56	0.34	0.52
83	LPC 18:0; [M+FA-H]- C26H54NO7P	MS2	M+HCOO	568.533	852.42	0	0	0	0	0	0	0	0	0	0	852.4	852.4	852.4	852.4	852.4	852.4	852.4	852.4	852.4	852.4	0.89	0.95	0.96	0.94	0.95	0.94	0.92	0.96	0.92	0.92	0	0	0	0	0	0	0	0	0	0
84	LPC 20:4; [M+FA-H]- C28H50NO7P	MS1	M+HCOO	588.328	796.52	12.07	36.65	9.74	7.16	54.52						796.5	796	796.5	796.5	796						0.87	0.86	0.91	0.89	0.9						0.74	0.79	0.63	0.6	0.91
84	LPC 20:4; [M+FA-H]- C28H50NO7P	MS2	M+HCOO	303.232	796.52	4.17	17.31	4.62	2.5	26.4						796.5	796	796.5	796.5	796						0.87	0.86	0.91	0.89	0.9						0.81	0.91	0.83	0.7	0.96
84	LPC 20:4; [M+FA-H]- C28H50NO7P	MS2	M+HCOO	528.308	796.52	8.7	12.56	3.88	3.76	25.5						796.5	796	796.5	796.5	796						0.87	0.86	0.91	0.89	0.9						0.74	0.72	0.55	0.6	0.91
84	LPC 20:4; [M+FA-H]- C28H50NO7P	MS2	M+HCOO	588.334	796.52	4.84	14.5	2.99	2.24	16.84						796.5	796	796.5	796.5	796						0.87	0.86	0.91	0.89	0.9						0.64	0.79	0.63	0.34	0.83
84	LPC 20:4; [M+FA-H]- C28H50NO7P	MS2	M+HCOO	259.242	796.52	0	0	0	0	0						796.5	796	796.5	796.5	796						0.87	0.86	0.91	0.89	0.9						0	0	0	0	0
84	LPC 20:4; [M+FA-H]- C28H50NO7P	MS2	M+HCOO	242.08	796.52	0	0	0	0	0						796.5	796	796.5	796.5	796						0.87	0.86	0.91	0.89	0.9						0	0	0	0	0
84	LPC 20:4; [M+FA-H]- C28H50NO7P	MS2	M+HCOO	588.5	796.52	1	0	0	0	0						796.5	796	796.5	796.5	796						0.87	0.86	0.91	0.89	0.9						0.53	0	0	0	0
85	LPI 18:0; [M-H]- C27H53O12P	MS1	M-H	599.317	825.9	34.47	35.61	34.11	30.22	30.99	39.07	32.36	34.63	35.03	32.98	825.9	825.9	825.9	825.9	824.8	825.9	824.8	825.9	825.9	825.9	0.93	0.92	0.9	0.92	0.96	0.96	0.95	0.93	0.96	0.92	0.73	0.63	0.77	0.86	0.79	0.84	0.6	0.72	0.84	0.67
85	LPI 18:0; [M-H]- C27H53O12P	MS2	M-H	599.321	825.9	20.84	26.11	39.76	48.67	39.67	55.39	56.74	43.19	43.02	35.17	825.9	825.9	825.9	825.9	824.8	825.9	824.8	825.9	825.9	825.9	0.93	0.92	0.9	0.92	0.96	0.96	0.95	0.93	0.96	0.92	0.74	0.75	0.83	0.95	0.95	0.92	0.9	0.89	0.98	0.78
85	LPI 18:0; [M-H]- C27H53O12P	MS2	M-H	283.265	825.9	11	12.61	9.96	18.61	15.1	15.37	15	10.2	9.74	7.64	825.9	825.9	825.9	825.9	824.8	825.9	824.8	825.9	825.9	825.9	0.93	0.92	0.9	0.92	0.96	0.96	0.95	0.93	0.96	0.92	0.73	0.63	0.77	0.86	0.76	0.84	0.6	0.68	0.83	0.67
85	LPI 18:0; [M-H]- C27H53O12P	MS2	M-H	315.046	825.9	0	0	0.64	0	1.09	0	0.54	0.73	1.54	1.09	825.9	825.9	825.9	825.9	824.8	825.9	824.8	825.9	825.9	825.9	0.93	0.92	0.9	0.92	0.96	0.96	0.95	0.93	0.96	0.92	0	0	0.67	0	0.79	0	0.56	0.65	0.41	0.63
85	LPI 18:0; [M-H]- C27H53O12P	MS2	M-H	241.012	825.9	1.75	0.16	0	1.12	2.94	0.96	1.12	3.35	1.75	0	825.9	825.9	825.9	825.9	824.8	825.9	824.8	825.9	825.9	825.9	0.93	0.92	0.9	0.92	0.96	0.96	0.95	0.93	0.96	0.92	0.64	0.61	0	0.48	0.73	0.71	0.58	0.72	0.84	0
85	LPI 18:0; [M-H]- C27H53O12P	MS2	M-H	152.996	825.9	2.28	0	0	1.77	1.65	2.03	1.39	0	0.89	0.95	825.9	825.9	825.9	825.9	824.8	825.9	824.8	825.9	825.9	825.9	0.93	0.92	0.9	0.92	0.96	0.96	0.95	0.93	0.96	0.92	0.61	0	0	0.65	0.7	0.82	0.49	0	0.44	0.58
85	LPI 18:0; [M-H]- C27H53O12P	MS2	M-H	599.406	825.9	0	2.51	0	0	0	1.64	0	0	0	0	825.9	825.9	825.9	825.9	824.8	825.9	824.8	825.9	825.9	825.9	0.93	0.92	0.9	0.92	0.96	0.96	0.95	0.93	0.96	0.92	0	0.32	0	0	0	0.62	0	0	0	0
86	Uridine-5-diphosphoacetylgalactosamine C17H27N3O17P2---Uridine-5-diphosphoacetylglucosamine C17H27N3O17P2	MS1	M-H	606.071	58.26	297.8	210.05	593.28	609.77	1305.27	105.1	123.23	70.21	1682.82	432.21	59	59	59	59	57.8	59	59	57.9	57.8	59	1	0.99	0.99	0.99	0.99	0.99	0.99	0.99	0.99	0.99	0.93	0.94	0.9	0.9	0.94	0.94	0.8	0.81	0.93	0.96
86	Uridine-5-diphosphoacetylgalactosamine C17H27N3O17P2---Uridine-5-diphosphoacetylglucosamine C17H27N3O17P2	MS2	M-H	606.073	58.26	340.76	86.18	819.85	732.42	1443.97	73.75	99.33	78.73	2217.41	467.9	59	59	59	59	57.8	59	59	57.9	57.8	59	1	0.99	0.99	0.99	0.99	0.99	0.99	0.99	0.99	0.99	0.91	0.59	0.9	0.89	0.93	0.96	0.95	0.81	0.92	0.91
86	Uridine-5-diphosphoacetylgalactosamine C17H27N3O17P2---Uridine-5-diphosphoacetylglucosamine C17H27N3O17P2	MS2	M-H	384.983	58.26	48.7	36.89	120.33	118.61	211.85	12.67	21.07	16.49	336.79	62.48	59	59	59	59	57.8	59	59	57.9	57.8	59	1	0.99	0.99	0.99	0.99	0.99	0.99	0.99	0.99	0.99	0.93	0.89	0.87	0.87	0.96	0.85	0.72	0.78	0.93	0.94
86	Uridine-5-diphosphoacetylgalactosamine C17H27N3O17P2---Uridine-5-diphosphoacetylglucosamine C17H27N3O17P2	MS2	M-H	282.038	58.26	18.28	8.31	32.64	35.41	56.75	5.09	8.17	4.29	95.93	25.82	59	59	59	59	57.8	59	59	57.9	57.8	59	1	0.99	0.99	0.99	0.99	0.99	0.99	0.99	0.99	0.99	0.94	0.94	0.9	0.9	0.94	0.94	0.68	0.92	0.87	0.98
86	Uridine-5-diphosphoacetylgalactosamine C17H27N3O17P2---Uridine-5-diphosphoacetylglucosamine C17H27N3O17P2	MS2	M-H	402.993	58.26	19.83	10.04	43.72	42.54	66.24	2.88	6.79	2.88	104.82	30.44	59	59	59	59	57.8	59	59	57.9	57.8	59	1	0.99	0.99	0.99	0.99	0.99	0.99	0.99	0.99	0.99	0.89	0.71	0.82	0.91	0.94	0.84	0.8	0.39	0.91	0.85
86	Uridine-5-diphosphoacetylgalactosamine C17H27N3O17P2---Uridine-5-diphosphoacetylglucosamine C17H27N3O17P2	MS2	M-H	272.957	58.26	12.29	7.33	20.92	24.48	45.21	5.59	1.61	2.36	64.4	12.21	59	59	59	59	57.8	59	59	57.9	57.8	59	1	0.99	0.99	0.99	0.99	0.99	0.99	0.99	0.99	0.99	0.91	0.95	0.88	0.87	0.93	0.64	0.78	0.81	0.91	0.96
86	Uridine-5-diphosphoacetylgalactosamine C17H27N3O17P2---Uridine-5-diphosphoacetylglucosamine C17H27N3O17P2	MS2	M-H	362.003	58.26	19.48	6.64	31.89	22.32	52.18	4.47	5.55	3.55	93.35	19.43	59	59	59	59	57.8	59	59	57.9	57.8	59	1	0.99	0.99	0.99	0.99	0.99	0.99	0.99	0.99	0.99	0.85	0.74	0.85	0.79	0.91	0.89	0.45	0.42	0.94	0.92
87	Glutathione (oxidized) C20H32N6O12S2---Oxidized glutathione C20H32N6O12S2	MS1	M-H	611.142	57.91	4324.36	3423.31	3103.86	5344.93	7677.73	1937.16	2314.72	1060.1	5204.95	2688.16	57.9	57.8	57.9	57.8	57.8	57.8	57.8	57.9	57.8	57.8	0.99	0.99	1	0.99	0.99	1	0.99	0.99	0.99	1	0.95	0.93	0.91	0.91	0.94	0.97	0.96	0.94	0.93	0.92
87	Glutathione (oxidized) C20H32N6O12S2---Oxidized glutathione C20H32N6O12S2	MS2	M-H	611.142	57.91	3187.7	2739.97	1879.33	3610.01	5166.59	782.03	1618.28	703.28	3599.31	1987.25	57.9	57.8	57.9	57.8	57.8	57.8	57.8	57.9	57.8	57.8	0.99	0.99	1	0.99	0.99	1	0.99	0.99	0.99	1	0.95	0.93	0.58	0.78	0.94	0.78	0.96	0.91	0.84	0.9
87	Glutathione (oxidized) C20H32N6O12S2---Oxidized glutathione C20H32N6O12S2	MS2	M-H	306.075	57.91	1950.59	1598.54	1566.48	2654.15	2927.66	766.33	1010.87	509.62	2538.34	1272.07	57.9	57.8	57.9	57.8	57.8	57.8	57.8	57.9	57.8	57.8	0.99	0.99	1	0.99	0.99	1	0.99	0.99	0.99	1	0.95	0.93	0.9	0.9	0.93	0.98	0.95	0.94	0.93	0.92
87	Glutathione (oxidized) C20H32N6O12S2---Oxidized glutathione C20H32N6O12S2	MS2	M-H	272.088	57.91	667.49	555.6	569.57	868.85	946.67	269.27	365	184.52	845.13	424.15	57.9	57.8	57.9	57.8	57.8	57.8	57.8	57.9	57.8	57.8	0.99	0.99	1	0.99	0.99	1	0.99	0.99	0.99	1	0.94	0.93	0.91	0.92	0.92	0.97	0.95	0.91	0.93	0.91
87	Glutathione (oxidized) C20H32N6O12S2---Oxidized glutathione C20H32N6O12S2	MS2	M-H	254.078	57.91	211.67	181.22	174.43	287.66	332.83	91.45	108.63	54.05	270.11	123.56	57.9	57.8	57.9	57.8	57.8	57.8	57.8	57.9	57.8	57.8	0.99	0.99	1	0.99	0.99	1	0.99	0.99	0.99	1	0.93	0.92	0.88	0.91	0.94	0.96	0.92	0.94	0.91	0.93
87	Glutathione (oxidized) C20H32N6O12S2---Oxidized glutathione C20H32N6O12S2	MS2	M-H	338.048	57.91	173.11	138.67	156.12	269.08	291.92	67.4	92.01	46.12	218.77	96.59	57.9	57.8	57.9	57.8	57.8	57.8	57.8	57.9	57.8	57.8	0.99	0.99	1	0.99	0.99	1	0.99	0.99	0.99	1	0.94	0.95	0.91	0.9	0.92	0.96	0.92	0.91	0.94	0.9
87	Glutathione (oxidized) C20H32N6O12S2---Oxidized glutathione C20H32N6O12S2	MS2	M-H	304.06	57.91	192.87	156.29	163.74	256.41	311.65	76.68	102.34	58.68	245.61	125.74	57.9	57.8	57.9	57.8	57.8	57.8	57.8	57.9	57.8	57.8	0.99	0.99	1	0.99	0.99	1	0.99	0.99	0.99	1	0.94	0.92	0.9	0.9	0.92	0.97	0.96	0.93	0.93	0.91
88	LPC 22:6; [M+FA-H]- C30H50NO7P	MS1	M+HCOO	612.328	793.27					8.75										793.3										0.92										0.59
88	LPC 22:6; [M+FA-H]- C30H50NO7P	MS2	M+HCOO	327.233	793.27					1.3										793.3										0.92										0.59
88	LPC 22:6; [M+FA-H]- C30H50NO7P	MS2	M+HCOO	552.309	793.27					1.21										793.3										0.92										0.59
88	LPC 22:6; [M+FA-H]- C30H50NO7P	MS2	M+HCOO	283.243	793.27					0.86										793.3										0.92										0.61
88	LPC 22:6; [M+FA-H]- C30H50NO7P	MS2	M+HCOO	612.328	793.27					1.02										793.3										0.92										0.59
88	LPC 22:6; [M+FA-H]- C30H50NO7P	MS2	M+HCOO	229.197	793.27					0										793.3										0.92										0
88	LPC 22:6; [M+FA-H]- C30H50NO7P	MS2	M+HCOO	242.08	793.27					0										793.3										0.92										0
89	LPI 20:4; [M-H]- C29H49O12P	MS1	M-H	619.286	773.43					6.29				8.89						773.4				773.4						0.89				0.93						0.51				0.64
89	LPI 20:4; [M-H]- C29H49O12P	MS2	M-H	619.288	773.43					8.64				4.57						773.4				773.4						0.89				0.93						0.76				0.62
89	LPI 20:4; [M-H]- C29H49O12P	MS2	M-H	303.234	773.43					0				0.18						773.4				773.4						0.89				0.93						0				0.64
89	LPI 20:4; [M-H]- C29H49O12P	MS2	M-H	152.996	773.43					0.51				0.76						773.4				773.4						0.89				0.93						0.51				0.64
89	LPI 20:4; [M-H]- C29H49O12P	MS2	M-H	315.047	773.43					0				0.73						773.4				773.4						0.89				0.93						0				0.74
89	LPI 20:4; [M-H]- C29H49O12P	MS2	M-H	241.012	773.43					0				0						773.4				773.4						0.89				0.93						0				0
89	LPI 20:4; [M-H]- C29H49O12P	MS2	M-H	619.398	773.43					0				0						773.4				773.4						0.89				0.93						0				0
90	.beta.-Nicotinamide adenine dinucleotide [M-H]- C21H27N7O14P2 NIST 1179489	MS1	M-H	662.099	132.64	683.88	113.19	1078.98	780.61	1496.16	263.06	629.47	1047.02	1723.25	704.51	134.4	132.2	133.3	135.5	133.3	134.4	134.4	134.4	134.4	134.4	0.99	0.99	0.99	0.99	0.99	0.98	0.99	0.99	0.99	0.99	0.93	0.94	0.95	0.94	0.97	0.95	0.95	0.92	0.93	0.94
90	.beta.-Nicotinamide adenine dinucleotide [M-H]- C21H27N7O14P2 NIST 1179489	MS2	M-H	540.053	132.64	1485.94	255.1	2417.97	1766.09	3304.16	528	1378.41	2325.32	3855.22	1489.34	134.4	132.2	133.3	135.5	133.3	134.4	134.4	134.4	134.4	134.4	0.99	0.99	0.99	0.99	0.99	0.98	0.99	0.99	0.99	0.99	0.93	0.94	0.94	0.89	0.97	0.93	0.95	0.92	0.95	0.94
90	.beta.-Nicotinamide adenine dinucleotide [M-H]- C21H27N7O14P2 NIST 1179489	MS2	M-H	408.01	132.64	79.46	7	144.4	89.17	169.66	35.35	76.28	128.95	208.09	73.07	134.4	132.2	133.3	135.5	133.3	134.4	134.4	134.4	134.4	134.4	0.99	0.99	0.99	0.99	0.99	0.98	0.99	0.99	0.99	0.99	0.91	0.53	0.95	0.88	0.97	0.89	0.96	0.9	0.91	0.88
90	.beta.-Nicotinamide adenine dinucleotide [M-H]- C21H27N7O14P2 NIST 1179489	MS2	M-H	426.021	132.64	93.73	19.41	155.7	120.17	196.97	37.36	80.81	158.82	253.61	100.31	134.4	132.2	133.3	135.5	133.3	134.4	134.4	134.4	134.4	134.4	0.99	0.99	0.99	0.99	0.99	0.98	0.99	0.99	0.99	0.99	0.9	0.98	0.95	0.92	0.94	0.93	0.95	0.9	0.92	0.94
90	.beta.-Nicotinamide adenine dinucleotide [M-H]- C21H27N7O14P2 NIST 1179489	MS2	M-H	272.958	132.64	68.98	11.2	114.87	87.26	160.56	19.59	66.76	109.05	190.52	70.9	134.4	132.2	133.3	135.5	133.3	134.4	134.4	134.4	134.4	134.4	0.99	0.99	0.99	0.99	0.99	0.98	0.99	0.99	0.99	0.99	0.93	0.94	0.92	0.88	0.98	0.87	0.92	0.91	0.93	0.85
90	.beta.-Nicotinamide adenine dinucleotide [M-H]- C21H27N7O14P2 NIST 1179489	MS2	M-H	328.045	132.64	62.46	10.64	116.48	73.16	145.14	23.36	58.72	109.99	184.01	65.17	134.4	132.2	133.3	135.5	133.3	134.4	134.4	134.4	134.4	134.4	0.99	0.99	0.99	0.99	0.99	0.98	0.99	0.99	0.99	0.99	0.88	0.72	0.93	0.95	0.97	0.96	0.91	0.94	0.93	0.94
90	.beta.-Nicotinamide adenine dinucleotide [M-H]- C21H27N7O14P2 NIST 1179489	MS2	M-H	346.056	132.64	48.06	7.58	78.09	68.96	112.69	20.56	52.38	89.14	136.61	48.41	134.4	132.2	133.3	135.5	133.3	134.4	134.4	134.4	134.4	134.4	0.99	0.99	0.99	0.99	0.99	0.98	0.99	0.99	0.99	0.99	0.92	0.86	0.93	0.94	0.95	0.95	0.93	0.9	0.93	0.92
90	ISF of .beta.-Nicotinamide adenine dinucleotide [M-H]- C21H27N7O14P2 NIST 1179489	MS1	-	540.051	133.05	473.7	72.15	754.43	524.48	969.38	177.14	415.65	672.25	1134.39	438.78	134.4	132.2	133.3	135.5	133.3	134.4	134.4	134.4	134.4	134.4	0.99	1	0.98	0.98	0.98	0.98	0.96	0.96	0.99	0.99	0.97	0.8	0.97	0.9	0.96	0.92	0.96	0.95	0.98	0.92
90	ISF of .beta.-Nicotinamide adenine dinucleotide [M-H]- C21H27N7O14P2 NIST 1179489	MS2	-	540.05	133.05	70.27	17.15	188.28	211.58	340.94	44.27	97.79	289.86	389.69	190.7	134.4	132.2	133.3	135.5	133.3	134.4	134.4	134.4	134.4	134.4	0.99	1	0.98	0.98	0.98	0.98	0.96	0.96	0.99	0.99	0.64	0.77	0.84	0.9	0.96	0.75	0.87	0.94	0.98	0.75
90	ISF of .beta.-Nicotinamide adenine dinucleotide [M-H]- C21H27N7O14P2 NIST 1179489	MS2	-	426.019	133.05	15.89	5.5	23.59	25.48	29.31	11.55	8.94	33.9	58.56	24.57	134.4	132.2	133.3	135.5	133.3	134.4	134.4	134.4	134.4	134.4	0.99	1	0.98	0.98	0.98	0.98	0.96	0.96	0.99	0.99	0.71	0.75	0.87	0.87	0.87	0.83	0.77	0.96	0.98	0.76
90	ISF of .beta.-Nicotinamide adenine dinucleotide [M-H]- C21H27N7O14P2 NIST 1179489	MS2	-	272.955	133.05	30.93	4.66	41.69	35.52	62.55	14.28	21.35	50.35	86.58	27.09	134.4	132.2	133.3	135.5	133.3	134.4	134.4	134.4	134.4	134.4	0.99	1	0.98	0.98	0.98	0.98	0.96	0.96	0.99	0.99	0.98	0.8	0.97	0.89	0.95	0.81	0.96	0.92	0.98	0.93
90	ISF of .beta.-Nicotinamide adenine dinucleotide [M-H]- C21H27N7O14P2 NIST 1179489	MS2	-	328.043	133.05	16.99	2.79	38.26	29.51	44.02	5.44	12.89	36.4	63.7	24.64	134.4	132.2	133.3	135.5	133.3	134.4	134.4	134.4	134.4	134.4	0.99	1	0.98	0.98	0.98	0.98	0.96	0.96	0.99	0.99	0.94	0.5	0.93	0.88	0.9	0.62	0.91	0.92	0.98	0.92
90	ISF of .beta.-Nicotinamide adenine dinucleotide [M-H]- C21H27N7O14P2 NIST 1179489	MS2	-	408.011	133.05	23.16	1.76	27.57	26.03	49.07	11	18.27	38.24	62.67	29.48	134.4	132.2	133.3	135.5	133.3	134.4	134.4	134.4	134.4	134.4	0.99	1	0.98	0.98	0.98	0.98	0.96	0.96	0.99	0.99	0.97	0.81	0.84	0.85	0.93	0.92	0.86	0.95	0.96	0.92
90	ISF of .beta.-Nicotinamide adenine dinucleotide [M-H]- C21H27N7O14P2 NIST 1179489	MS2	-	158.926	133.05	12.4	1.23	10.56	13.76	22.21	4.96	10.79	16.66	24.88	8.49	134.4	132.2	133.3	135.5	133.3	134.4	134.4	134.4	134.4	134.4	0.99	1	0.98	0.98	0.98	0.98	0.96	0.96	0.99	0.99	0.93	0.77	0.97	0.9	0.97	0.96	0.99	0.93	0.98	0.82
91	.beta.-Nicotinamide adenine dinucleotide, reduced [M-H]- C21H29N7O14P2 NIST 1161866	MS1	M-H	664.115	222.33					50.77				384.26	10.67					223.2				223.2	222.3					0.98				0.99	0.92					0.66				0.92	0.52
91	.beta.-Nicotinamide adenine dinucleotide, reduced [M-H]- C21H29N7O14P2 NIST 1161866	MS2	M-H	664.116	222.33					60.07				629.3	13.53					223.2				223.2	222.3					0.98				0.99	0.92					0.66				0.91	0.82
91	.beta.-Nicotinamide adenine dinucleotide, reduced [M-H]- C21H29N7O14P2 NIST 1161866	MS2	M-H	408.009	222.33					5.68				51.19	2.28					223.2				223.2	222.3					0.98				0.99	0.92					0.5				0.92	0.52
91	.beta.-Nicotinamide adenine dinucleotide, reduced [M-H]- C21H29N7O14P2 NIST 1161866	MS2	M-H	397.019	222.33					4.39				36.75	0					223.2				223.2	222.3					0.98				0.99	0.92					0.48				0.94	0
91	.beta.-Nicotinamide adenine dinucleotide, reduced [M-H]- C21H29N7O14P2 NIST 1161866	MS2	M-H	346.055	222.33					4.96				16.68	0.19					223.2				223.2	222.3					0.98				0.99	0.92					0.67				0.88	0.11
91	.beta.-Nicotinamide adenine dinucleotide, reduced [M-H]- C21H29N7O14P2 NIST 1161866	MS2	M-H	328.044	222.33					0				11.31	0					223.2				223.2	222.3					0.98				0.99	0.92					0				0.9	0
91	.beta.-Nicotinamide adenine dinucleotide, reduced [M-H]- C21H29N7O14P2 NIST 1161866	MS2	M-H	272.956	222.33					0				2.61	0					223.2				223.2	222.3					0.98				0.99	0.92					0				0.67	0
92	Tetrasaccharides (Hex-Hex-Hex-Hex); PlaSMA ID-1820 C24H42O21---Tetrasaccharides (Hex-Hex-Hex-Hex); PlaSMA ID-1917 C24H42O21	MS1	M-H	665.212	72.38	62.69	24.94	165.48	168.38	145.83	180.87	105.55	225.18	433.91	324.8	72.3	72.4	72.3	72.3	72.3	72.3	72.3	72.3	72.3	72.3	0.98	0.79	0.97	0.99	0.96	0.99	0.98	0.99	0.99	1	0.81	0.63	0.9	0.89	0.9	0.86	0.77	0.89	0.96	0.91
92	Tetrasaccharides (Hex-Hex-Hex-Hex); PlaSMA ID-1820 C24H42O21---Tetrasaccharides (Hex-Hex-Hex-Hex); PlaSMA ID-1917 C24H42O21	MS2	M-H	161.045	72.38	6.88	2.15	15.08	19.58	15.32	16.7	12.6	27.26	35.65	37.05	72.3	72.4	72.3	72.3	72.3	72.3	72.3	72.3	72.3	72.3	0.98	0.79	0.97	0.99	0.96	0.99	0.98	0.99	0.99	1	0.81	0.87	0.88	0.89	0.94	0.86	0.94	0.93	0.98	0.91
92	Tetrasaccharides (Hex-Hex-Hex-Hex); PlaSMA ID-1820 C24H42O21---Tetrasaccharides (Hex-Hex-Hex-Hex); PlaSMA ID-1917 C24H42O21	MS2	M-H	545.173	72.38	2.88	0	11.86	16.68	4.32	11.43	12.04	19.4	38.46	35.01	72.3	72.4	72.3	72.3	72.3	72.3	72.3	72.3	72.3	72.3	0.98	0.79	0.97	0.99	0.96	0.99	0.98	0.99	0.99	1	0.74	0	0.9	0.87	0.63	0.95	0.77	0.89	0.93	0.81
92	Tetrasaccharides (Hex-Hex-Hex-Hex); PlaSMA ID-1820 C24H42O21---Tetrasaccharides (Hex-Hex-Hex-Hex); PlaSMA ID-1917 C24H42O21	MS2	M-H	383.119	72.38	4.02	1.2	7.81	15.38	10.27	13.67	8.81	14.66	19.43	16.52	72.3	72.4	72.3	72.3	72.3	72.3	72.3	72.3	72.3	72.3	0.98	0.79	0.97	0.99	0.96	0.99	0.98	0.99	0.99	1	0.95	0.63	0.77	0.78	0.62	0.85	0.66	0.79	0.82	0.76
92	Tetrasaccharides (Hex-Hex-Hex-Hex); PlaSMA ID-1820 C24H42O21---Tetrasaccharides (Hex-Hex-Hex-Hex); PlaSMA ID-1917 C24H42O21	MS2	M-H	179.057	72.38	2.47	2.82	9.51	8.47	7.04	7.26	3.97	8.06	16.11	14.26	72.3	72.4	72.3	72.3	72.3	72.3	72.3	72.3	72.3	72.3	0.98	0.79	0.97	0.99	0.96	0.99	0.98	0.99	0.99	1	0.77	0.42	0.9	0.89	0.9	0.84	0.68	0.88	0.91	0.92
92	Tetrasaccharides (Hex-Hex-Hex-Hex); PlaSMA ID-1820 C24H42O21---Tetrasaccharides (Hex-Hex-Hex-Hex); PlaSMA ID-1917 C24H42O21	MS2	M-H	341.108	72.38	2.94	0	13.57	10.18	9.66	10.88	8.68	11.7	27.08	24.26	72.3	72.4	72.3	72.3	72.3	72.3	72.3	72.3	72.3	72.3	0.98	0.79	0.97	0.99	0.96	0.99	0.98	0.99	0.99	1	0.67	0	0.84	0.75	0.67	0.77	0.61	0.8	0.96	0.85
92	Tetrasaccharides (Hex-Hex-Hex-Hex); PlaSMA ID-1820 C24H42O21---Tetrasaccharides (Hex-Hex-Hex-Hex); PlaSMA ID-1917 C24H42O21	MS2	M-H	425.13	72.38	1.59	0.21	0.21	0.84	3.39	3.91	2.33	5.71	7.47	9.28	72.3	72.4	72.3	72.3	72.3	72.3	72.3	72.3	72.3	72.3	0.98	0.79	0.97	0.99	0.96	0.99	0.98	0.99	0.99	1	0.57	0.28	0.54	0.59	0.69	0.61	0.77	0.81	0.66	0.88
93	3'-Dephosphocoenzyme A; LC-ESI-QTOF; MS2; CE C21H35N7O13P2S	MS1	M-H	686.139	311.63									20.51										311.6										0.96										0.76
93	3'-Dephosphocoenzyme A; LC-ESI-QTOF; MS2; CE C21H35N7O13P2S	MS2	M-H	686.141	311.63									41.95										311.6										0.96										0.98
93	3'-Dephosphocoenzyme A; LC-ESI-QTOF; MS2; CE C21H35N7O13P2S	MS2	M-H	419.042	311.63									1.68										311.6										0.96										0.43
93	3'-Dephosphocoenzyme A; LC-ESI-QTOF; MS2; CE C21H35N7O13P2S	MS2	M-H	339.078	311.63									0										311.6										0.96										0
93	3'-Dephosphocoenzyme A; LC-ESI-QTOF; MS2; CE C21H35N7O13P2S	MS2	M-H	346.055	311.63									1.62										311.6										0.96										0.76
93	3'-Dephosphocoenzyme A; LC-ESI-QTOF; MS2; CE C21H35N7O13P2S	MS2	M-H	408.01	311.63									0.21										311.6										0.96										0.52
93	3'-Dephosphocoenzyme A; LC-ESI-QTOF; MS2; CE C21H35N7O13P2S	MS2	M-H	357.087	311.63									0										311.6										0.96										0
94	2'-Deoxyguanosine 5'-monophosphate [M-H]- C10H14N5O7P NIST 1178796	MS1	2M-H	693.116	78.2	101.79	85.88	183.53	175.59	296.68	138.14	72.56	27.63	395.87	281.47	80.1	78.9	78.9	80	78.9	80	80	78.9	78.9	78.9	0.97	0.97	0.97	0.96	0.96	0.94	0.95	0.96	0.95	0.95	0.85	0.79	0.97	0.91	0.89	0.87	0.83	0.76	0.91	0.89
94	2'-Deoxyguanosine 5'-monophosphate [M-H]- C10H14N5O7P NIST 1178796	MS2	2M-H	346.055	78.2	125.87	128.09	233.47	236.39	363.46	168.48	81.37	22.11	481.39	319.86	80.1	78.9	78.9	80	78.9	80	80	78.9	78.9	78.9	0.97	0.97	0.97	0.96	0.96	0.94	0.95	0.96	0.95	0.95	0.9	0.92	0.97	0.91	0.93	0.87	0.85	0.96	0.94	0.92
94	2'-Deoxyguanosine 5'-monophosphate [M-H]- C10H14N5O7P NIST 1178796	MS2	2M-H	693.119	78.2	31.99	20.89	67.42	57.81	106.62	60.67	32.27	5.18	137.93	84.14	80.1	78.9	78.9	80	78.9	80	80	78.9	78.9	78.9	0.97	0.97	0.97	0.96	0.96	0.94	0.95	0.96	0.95	0.95	0.85	0.79	0.97	0.94	0.89	0.87	0.83	0.76	0.91	0.89
94	2'-Deoxyguanosine 5'-monophosphate [M-H]- C10H14N5O7P NIST 1178796	MS2	2M-H	78.9603	78.2	0	0	0.64	1.09	0.27	0.27	0	0	0.55	1	80.1	78.9	78.9	80	78.9	80	80	78.9	78.9	78.9	0.97	0.97	0.97	0.96	0.96	0.94	0.95	0.96	0.95	0.95	0	0	0.37	0.43	0.52	0.54	0	0	0.23	0.75
95	Inosine 5'-monophosphate [M-H]- C10H13N4O8P NIST 1178897	MS1	2M-H	695.084	66.11								151.65										66.7										0.99										0.78
95	Inosine 5'-monophosphate [M-H]- C10H13N4O8P NIST 1178897	MS2	2M-H	347.039	66.11								197.74										66.7										0.99										0.88
95	Inosine 5'-monophosphate [M-H]- C10H13N4O8P NIST 1178897	MS2	2M-H	695.085	66.11								9.38										66.7										0.99										0.28
95	Inosine 5'-monophosphate [M-H]- C10H13N4O8P NIST 1178897	MS2	2M-H	427.003	66.11								4.1										66.7										0.99										0.78
95	Inosine 5'-monophosphate [M-H]- C10H13N4O8P NIST 1178897	MS2	2M-H	211.006	66.11								1.64										66.7										0.99										0.64
95	Inosine 5'-monophosphate [M-H]- C10H13N4O8P NIST 1178897	MS2	2M-H	425.677	66.11								0										66.7										0.99										0
95	Inosine 5'-monophosphate [M-H]- C10H13N4O8P NIST 1178897	MS2	2M-H	78.9599	66.11								0										66.7										0.99										0
96	Tetrasaccharides (Hex-Hex-Hex-Hex); PlaSMA ID-1820 C24H42O21	MS1	M+HCOO	711.218	71.51	53.86	21.11	137.16	167.08	121.16	162.24	88.15	195.58	383.66	297.34	71.2	71.5	71.2	71.2	71.2	71.2	71.2	71.2	71.2	71.2	0.85	0.73	0.94	0.94	0.94	0.92	0.98	0.94	0.93	0.77	0.91	0.7	0.85	0.96	0.87	0.96	0.91	0.95	0.97	0.97
96	Tetrasaccharides (Hex-Hex-Hex-Hex); PlaSMA ID-1820 C24H42O21	MS2	M+HCOO	545.169	71.51	6.19	0	22.24	25.85	21.24	14.15	13.18	26.33	29.1	0	71.2	71.5	71.2	71.2	71.2	71.2	71.2	71.2	71.2	71.2	0.85	0.73	0.94	0.94	0.94	0.92	0.98	0.94	0.93	0.77	0.57	0	0.85	0.93	0.7	0.63	0.83	0.91	0.61	0
96	Tetrasaccharides (Hex-Hex-Hex-Hex); PlaSMA ID-1820 C24H42O21	MS2	M+HCOO	179.056	71.51	3.57	3.16	13.71	13.02	9.56	11.37	8.61	14.91	28.13	20.32	71.2	71.5	71.2	71.2	71.2	71.2	71.2	71.2	71.2	71.2	0.85	0.73	0.94	0.94	0.94	0.92	0.98	0.94	0.93	0.77	0.91	0.45	0.84	0.96	0.87	0.91	0.9	0.88	0.94	0.93
96	Tetrasaccharides (Hex-Hex-Hex-Hex); PlaSMA ID-1820 C24H42O21	MS2	M+HCOO	665.219	71.51	30.04	16.18	82.44	97.79	63.25	80.31	36.74	97.21	189.04	149.77	71.2	71.5	71.2	71.2	71.2	71.2	71.2	71.2	71.2	71.2	0.85	0.73	0.94	0.94	0.94	0.92	0.98	0.94	0.93	0.77	0.94	0.7	0.96	0.97	0.79	0.97	0.76	0.95	0.98	0.98
96	Tetrasaccharides (Hex-Hex-Hex-Hex); PlaSMA ID-1820 C24H42O21	MS2	M+HCOO	383.121	71.51	5.92	2.41	17.42	17.21	12.87	17.99	8.63	21	37.87	29.09	71.2	71.5	71.2	71.2	71.2	71.2	71.2	71.2	71.2	71.2	0.85	0.73	0.94	0.94	0.94	0.92	0.98	0.94	0.93	0.77	0.84	0.46	0.84	0.87	0.79	0.92	0.91	0.93	0.97	0.89
96	Tetrasaccharides (Hex-Hex-Hex-Hex); PlaSMA ID-1820 C24H42O21	MS2	M+HCOO	341.106	71.51	8.71	7.1	17.19	21.98	23.69	23.21	18.03	36.53	68.16	54.31	71.2	71.5	71.2	71.2	71.2	71.2	71.2	71.2	71.2	71.2	0.85	0.73	0.94	0.94	0.94	0.92	0.98	0.94	0.93	0.77	0.66	0.72	0.75	0.84	0.9	0.96	0.93	0.95	0.97	0.97
96	Tetrasaccharides (Hex-Hex-Hex-Hex); PlaSMA ID-1820 C24H42O21	MS2	M+HCOO	587.177	71.51	0	0	10.18	5.68	2.84	17.43	5.71	15.17	10.85	4.71	71.2	71.5	71.2	71.2	71.2	71.2	71.2	71.2	71.2	71.2	0.85	0.73	0.94	0.94	0.94	0.92	0.98	0.94	0.93	0.77	0	0	0.57	0.62	0.66	0.81	0.53	0.7	0.51	0.59
97	.beta.-Nicotinamide adenine dinucleotide phosphate [M-H]- C21H28N7O17P3 NIST 1180408	MS1	M-H	742.066	65.89	24.97		91.92	113.96	226.82				327.63	47.24	66.7		66.7	66.7	66.7				66.7	65.6	0.95		0.97	0.99	0.99				0.99	0.99	0.71		0.82	0.89	0.96				0.92	0.72
97	.beta.-Nicotinamide adenine dinucleotide phosphate [M-H]- C21H28N7O17P3 NIST 1180408	MS2	M-H	620.02	65.89	22.55		122.27	164.79	351.93				615.66	54.94	66.7		66.7	66.7	66.7				66.7	65.6	0.95		0.97	0.99	0.99				0.99	0.99	0.71		0.96	0.97	0.96				0.92	0.88
97	.beta.-Nicotinamide adenine dinucleotide phosphate [M-H]- C21H28N7O17P3 NIST 1180408	MS2	M-H	408.011	65.89	3.74		8.86	15	33.25				56.69	5.99	66.7		66.7	66.7	66.7				66.7	65.6	0.95		0.97	0.99	0.99				0.99	0.99	0.84		0.78	0.89	0.98				0.93	0.58
97	.beta.-Nicotinamide adenine dinucleotide phosphate [M-H]- C21H28N7O17P3 NIST 1180408	MS2	M-H	602.008	65.89	0		6.3	6.54	6.74				23.3	3.78	66.7		66.7	66.7	66.7				66.7	65.6	0.95		0.97	0.99	0.99				0.99	0.99	0		0.5	0.88	0.93				0.84	0.68
97	.beta.-Nicotinamide adenine dinucleotide phosphate [M-H]- C21H28N7O17P3 NIST 1180408	MS2	M-H	272.957	65.89	0.34		3.13	0.68	5.98				5.15	1.53	66.7		66.7	66.7	66.7				66.7	65.6	0.95		0.97	0.99	0.99				0.99	0.99	0.58		0.82	0.58	0.8				0.79	0.72
97	.beta.-Nicotinamide adenine dinucleotide phosphate [M-H]- C21H28N7O17P3 NIST 1180408	MS2	M-H	505.987	65.89	0		0	1.39	11.59				15.46	2.19	66.7		66.7	66.7	66.7				66.7	65.6	0.95		0.97	0.99	0.99				0.99	0.99	0		0	0.64	0.75				0.83	0.71
97	.beta.-Nicotinamide adenine dinucleotide phosphate [M-H]- C21H28N7O17P3 NIST 1180408	MS2	M-H	522.04	65.89	0		0.82	1.64	7.27				9.23	0.7	66.7		66.7	66.7	66.7				66.7	65.6	0.95		0.97	0.99	0.99				0.99	0.99	0		0.61	0.63	0.87				0.47	0.62
98	FAD C27H33N9O15P2 MassBank 5112	MS1	M-H	784.147	368.53	13.2	17.37	39.51	58.29	139.17		7.05	20.21	434.9	23.91	368.5	368.5	368.6	368.6	368.6		368.5	368.5	368.6	368.5	0.83	0.58	0.57	0.96	0.99		0.97	0.58	1	0.95	0.77	0.61	0.83	0.76	0.93		0.51	0.66	0.92	0.85
98	FAD C27H33N9O15P2 MassBank 5112	MS2	M-H	784.149	368.53	11.39	0	0	56.33	151.98		3.87	0	536.08	38.74	368.5	368.5	368.6	368.6	368.6		368.5	368.5	368.6	368.5	0.83	0.58	0.57	0.96	0.99		0.97	0.58	1	0.95	0.77	0	0	0.76	0.94		0.51	0	0.74	0.85
98	FAD C27H33N9O15P2 MassBank 5112	MS2	M-H	437.085	368.53	0	5.78	12.24	16.17	48.4		2.79	10.55	171.91	5.89	368.5	368.5	368.6	368.6	368.6		368.5	368.5	368.6	368.5	0.83	0.58	0.57	0.96	0.99		0.97	0.58	1	0.95	0	0.61	0.83	0.49	0.93		0.59	0.66	0.93	0.87
98	FAD C27H33N9O15P2 MassBank 5112	MS2	M-H	346.055	368.53	3.05	2.87	5.41	13.73	23.46		1.15	1.72	70.24	2.86	368.5	368.5	368.6	368.6	368.6		368.5	368.5	368.6	368.5	0.83	0.58	0.57	0.96	0.99		0.97	0.58	1	0.95	0.77	0.64	0.95	0.9	0.93		0.51	0.74	0.92	0.74
98	FAD C27H33N9O15P2 MassBank 5112	MS2	M-H	517.051	368.53	1.17	0	0	0	1.86		0	0	3.97	0	368.5	368.5	368.6	368.6	368.6		368.5	368.5	368.6	368.5	0.83	0.58	0.57	0.96	0.99		0.97	0.58	1	0.95	0.34	0	0	0	0.56		0	0	0.48	0
98	FAD C27H33N9O15P2 MassBank 5112	MS2	M-H	180.991	368.53	0	0.28	0	0.96	3.52		0	0.97	10.01	0	368.5	368.5	368.6	368.6	368.6		368.5	368.5	368.6	368.5	0.83	0.58	0.57	0.96	0.99		0.97	0.58	1	0.95	0	0.44	0	0.36	0.88		0	0.36	0.88	0
98	FAD C27H33N9O15P2 MassBank 5112	MS2	M-H	408.011	368.53	0	0	0	0.62	1.04		0	0	9.59	0	368.5	368.5	368.6	368.6	368.6		368.5	368.5	368.6	368.5	0.83	0.58	0.57	0.96	0.99		0.97	0.58	1	0.95	0	0	0	0.65	0.39		0	0	0.62	0
99	Pentasaccharides (Hex-Hex-Hex-Hex-Hex); PlaSMA ID-2086 C30H52O26	MS1	M+HCOO	873.27	77.51	1.99	1.21		20.44	11.38	7.17	5.42		38.3	19.07	77.5	77.5		77.5	77.5	77.5	77.5		77.8	77.5	0.88	0.78		0.88	0.9	0.88	0.77		0.86	0.99	0.77	0.58		0.56	0.68	0.55	0.79		0.83	0.79
99	Pentasaccharides (Hex-Hex-Hex-Hex-Hex); PlaSMA ID-2086 C30H52O26	MS2	M+HCOO	827.27	77.51	3.53	0.59		13.77	7.48	12.52	3.24		56.88	29.81	77.5	77.5		77.5	77.5	77.5	77.5		77.8	77.5	0.88	0.78		0.88	0.9	0.88	0.77		0.86	0.99	0.77	0.58		0.56	0.16	0.55	0.97		0.95	0.71
99	Pentasaccharides (Hex-Hex-Hex-Hex-Hex); PlaSMA ID-2086 C30H52O26	MS2	M+HCOO	665.215	77.51	2.91	1.46		5.15	3.04	0	4.63		19.69	7.34	77.5	77.5		77.5	77.5	77.5	77.5		77.8	77.5	0.88	0.78		0.88	0.9	0.88	0.77		0.86	0.99	0.91	0.83		0.55	0.17	0	0.79		0.82	0.79
99	Pentasaccharides (Hex-Hex-Hex-Hex-Hex); PlaSMA ID-2086 C30H52O26	MS2	M+HCOO	341.11	77.51	0.57	0.19		2.46	3.4	1.61	0.76		10.62	5.87	77.5	77.5		77.5	77.5	77.5	77.5		77.8	77.5	0.88	0.78		0.88	0.9	0.88	0.77		0.86	0.99	0.52	0.58		0.6	0.54	0.33	0.57		0.83	0.75
99	Pentasaccharides (Hex-Hex-Hex-Hex-Hex); PlaSMA ID-2086 C30H52O26	MS2	M+HCOO	503.16	77.51	0.92	0		0	0.69	1.61	0		0	3.34	77.5	77.5		77.5	77.5	77.5	77.5		77.8	77.5	0.88	0.78		0.88	0.9	0.88	0.77		0.86	0.99	0.29	0		0	0.68	0.41	0		0	0.34
99	Pentasaccharides (Hex-Hex-Hex-Hex-Hex); PlaSMA ID-2086 C30H52O26	MS2	M+HCOO	161.046	77.51	0	0		1.83	1.3	1.17	0		4.6	5.46	77.5	77.5		77.5	77.5	77.5	77.5		77.8	77.5	0.88	0.78		0.88	0.9	0.88	0.77		0.86	0.99	0	0		0.43	0.82	0.24	0		0.75	0.85
99	Pentasaccharides (Hex-Hex-Hex-Hex-Hex); PlaSMA ID-2086 C30H52O26	MS2	M+HCOO	707.227	77.51	0	0		0	0	1.09	0		0	4.78	77.5	77.5		77.5	77.5	77.5	77.5		77.8	77.5	0.88	0.78		0.88	0.9	0.88	0.77		0.86	0.99	0	0		0	0	0.67	0		0	0.55

## Sheet: MetaboKit-Neg-Org
group	compound	Quantification Mode	adduct	mass	RT(library)	KO1	KO2	KO3	KO4	KO5	WT1	WT2	WT3	WT4	WT5	RT_KO1	RT_KO2	RT_KO3	RT_KO4	RT_KO5	RT_WT1	RT_WT2	RT_WT3	RT_WT4	RT_WT5	DOTP_KO1	DOTP_KO2	DOTP_KO3	DOTP_KO4	DOTP_KO5	DOTP_WT1	DOTP_WT2	DOTP_WT3	DOTP_WT4	DOTP_WT5	COR_KO1	COR_KO2	COR_KO3	COR_KO4	COR_KO5	COR_WT1	COR_WT2	COR_WT3	COR_WT4	COR_WT5
1	2(3H)-Benzothiazolethione C7H5NS2 MoNA 436441	MS1	M-H	165.979	22.05		88.92										22										0.99										0.74
1	2(3H)-Benzothiazolethione C7H5NS2 MoNA 436441	MS2	M-H	57.976	22.05		2.49										22										0.99										0.93
1	2(3H)-Benzothiazolethione C7H5NS2 MoNA 436441	MS2	M-H	134.007	22.05		0.97										22										0.99										0.74
2	Citric acid (Not validated, isomer of 228); PlaSMA ID-227 C6H8O7	MS1	M-H	191.019	34.92	5001.23	5586.59	5569.29	5156.37	6029.07	4790.31	4922.03	5229.19	4923.37	4974.31	34.9	34.9	34.9	34.9	34.9	34.9	34.9	34.9	34.9	34.9	0.97	0.83	0.83	0.92	0.97	0.88	0.89	0.98	0.94	0.9	0.82	0.75	0.69	0.79	0.73	0.7	0.63	0.66	0.73	0.61
2	Citric acid (Not validated, isomer of 228); PlaSMA ID-227 C6H8O7	MS2	M-H	57.0345	34.92	16.49	12.55	14.51	18.62	21.03	17.32	16.1	17.48	18	18.72	34.9	34.9	34.9	34.9	34.9	34.9	34.9	34.9	34.9	34.9	0.97	0.83	0.83	0.92	0.97	0.88	0.89	0.98	0.94	0.9	0.82	0.79	0.76	0.79	0.73	0.71	0.75	0.68	0.77	0.7
2	Citric acid (Not validated, isomer of 228); PlaSMA ID-227 C6H8O7	MS2	M-H	67.0196	34.92	9.4	8.02	9.64	14.38	19.43	15.72	16.25	13.8	11.01	15.03	34.9	34.9	34.9	34.9	34.9	34.9	34.9	34.9	34.9	34.9	0.97	0.83	0.83	0.92	0.97	0.88	0.89	0.98	0.94	0.9	0.76	0.75	0.65	0.61	0.66	0.65	0.63	0.66	0.73	0.55
2	Citric acid (Not validated, isomer of 228); PlaSMA ID-227 C6H8O7	MS2	M-H	111.01	34.92	33.5	34.48	41.25	37.08	36.87	43.23	47.2	30.81	27.66	43.42	34.9	34.9	34.9	34.9	34.9	34.9	34.9	34.9	34.9	34.9	0.97	0.83	0.83	0.92	0.97	0.88	0.89	0.98	0.94	0.9	0.83	0.68	0.69	0.79	0.75	0.7	0.61	0.66	0.68	0.61
2	Citric acid (Not validated, isomer of 228); PlaSMA ID-227 C6H8O7	MS2	M-H	59.0144	34.92	2.07	0	0	0	1.98	2.54	1.47	1.73	1.51	0	34.9	34.9	34.9	34.9	34.9	34.9	34.9	34.9	34.9	34.9	0.97	0.83	0.83	0.92	0.97	0.88	0.89	0.98	0.94	0.9	0.43	0	0	0	0.52	0.41	0.52	0.46	0.48	0
3	CITRATE C6H8O7	MS1	M-H	191.02	596	13666.7	13885.1	14108.5	14640.3	14064.9	14245.1	14152.1	14174.4	14357.6	14098.3	596	596	596	596	596	596	596	596	596	596	0.98	0.95	0.99	0.95	0.95	0.98	1	0.97	1	0.99	0.85	0.87	0.83	0.82	0.72	0.86	0.82	0.88	0.8	0.82
3	CITRATE C6H8O7	MS2	M-H	87.0087	596	56.59	51.54	58.94	52.47	110.6	59.9	61.42	28.82	91.5	57.86	596	596	596	596	596	596	596	596	596	596	0.98	0.95	0.99	0.95	0.95	0.98	1	0.97	1	0.99	0.85	0.77	0.73	0.79	0.52	0.83	0.73	0.79	0.62	0.68
3	CITRATE C6H8O7	MS2	M-H	111.008	596	83.31	79.31	93.06	90.61	108.63	94.25	69.77	49.92	93.55	61.21	596	596	596	596	596	596	596	596	596	596	0.98	0.95	0.99	0.95	0.95	0.98	1	0.97	1	0.99	0.84	0.8	0.68	0.75	0.68	0.82	0.82	0.86	0.69	0.82
3	CITRATE C6H8O7	MS2	M-H	57.0344	596	42.47	42.61	37.66	41.6	49.69	43.61	41.17	30.75	52.19	51.58	596	596	596	596	596	596	596	596	596	596	0.98	0.95	0.99	0.95	0.95	0.98	1	0.97	1	0.99	0.91	0.91	0.91	0.88	0.73	0.89	0.88	0.9	0.83	0.82
3	CITRATE C6H8O7	MS2	M-H	67.0192	596	28.81	28.82	30.42	24.87	38.37	30.57	32.3	19.62	36.31	37.5	596	596	596	596	596	596	596	596	596	596	0.98	0.95	0.99	0.95	0.95	0.98	1	0.97	1	0.99	0.83	0.87	0.78	0.82	0.6	0.86	0.78	0.88	0.69	0.64
3	CITRATE C6H8O7	MS2	M-H	85.0293	596	17.29	14.88	23.12	13.76	30.08	21.91	18.84	11.75	32.04	15.23	596	596	596	596	596	596	596	596	596	596	0.98	0.95	0.99	0.95	0.95	0.98	1	0.97	1	0.99	0.84	0.75	0.59	0.82	0.51	0.73	0.64	0.82	0.54	0.65
3	CITRATE C6H8O7	MS2	M-H	59.0139	596	4.21	6.58	6.42	5.56	5.84	5.82	5.76	5.34	6.91	5.93	596	596	596	596	596	596	596	596	596	596	0.98	0.95	0.99	0.95	0.95	0.98	1	0.97	1	0.99	0.71	0.71	0.83	0.72	0.72	0.71	0.78	0.85	0.8	0.7
4	2-Naphthalenesulfonic acid; LC-ESI-ITFT; MS2; CE C10H8O3S	MS1	M-H	207.012	18.54	27.83					48.67	40.33			38.44	17.2					17.2	17.2			17.2	0.76					0.99	0.97			0.76	0.72					0.68	0.75			0.75
4	2-Naphthalenesulfonic acid; LC-ESI-ITFT; MS2; CE C10H8O3S	MS2	M-H	143.05	18.54	0.14					2.61	1.81			0.14	17.2					17.2	17.2			17.2	0.76					0.99	0.97			0.76	0.72					0.68	0.89			0.75
4	2-Naphthalenesulfonic acid; LC-ESI-ITFT; MS2; CE C10H8O3S	MS2	M-H	79.9561	18.54	1.43					1.55	0.4			1.55	17.2					17.2	17.2			17.2	0.76					0.99	0.97			0.76	0.91					0.7	0.62			0.85
4	2-Naphthalenesulfonic acid; LC-ESI-ITFT; MS2; CE C10H8O3S	MS2	M-H	115.056	18.54	0					0.9	0.54			0	17.2					17.2	17.2			17.2	0.76					0.99	0.97			0.76	0					0.45	0.75			0
5	Diuron; LC-ESI-ITFT; MS2; CE C9H10Cl2N2O	MS1	M-H	231.009	27			211.09	162.03		431.28							26.9	26.9		26.9							0.94	0.96		0.96							0.67	0.59		0.81
5	Diuron; LC-ESI-ITFT; MS2; CE C9H10Cl2N2O	MS2	M-H	149.974	27			1.51	0.28		6.35							26.9	26.9		26.9							0.94	0.96		0.96							0.67	0.59		0.9
5	Diuron; LC-ESI-ITFT; MS2; CE C9H10Cl2N2O	MS2	M-H	185.951	27			0.77	0.31		3.67							26.9	26.9		26.9							0.94	0.96		0.96							0.83	0.59		0.81
5	Diuron; LC-ESI-ITFT; MS2; CE C9H10Cl2N2O	MS2	M-H	86.0029	27			0	0		0							26.9	26.9		26.9							0.94	0.96		0.96							0	0		0
6	Dodecyl sulfate; PlaSMA ID-444 C12H26O4S	MS1	M-H	265.148	47.08	371.99			185.62			366.65	283.35		397.6	46.5			46.5			46.5	46.5		46.5	0.98			0.9			0.96	0.93		0.95	0.79			0.54			0.73	0.79		0.91
6	Dodecyl sulfate; PlaSMA ID-444 C12H26O4S	MS2	M-H	96.9596	47.08	25.65			11.07			17.74	11.35		18.16	46.5			46.5			46.5	46.5		46.5	0.98			0.9			0.96	0.93		0.95	0.92			0.94			0.88	0.98		0.96
6	Dodecyl sulfate; PlaSMA ID-444 C12H26O4S	MS2	M-H	79.9571	47.08	1.3			0			0.45	0.3		0.71	46.5			46.5			46.5	46.5		46.5	0.98			0.9			0.96	0.93		0.95	0.79			0			0.55	0.53		0.75
6	Dodecyl sulfate; PlaSMA ID-444 C12H26O4S	MS2	M-H	265.15	47.08	1.19			0.74			1.83	2.02		3.38	46.5			46.5			46.5	46.5		46.5	0.98			0.9			0.96	0.93		0.95	0.73			0.54			0.73	0.79		0.91
6	Dodecyl sulfate; PlaSMA ID-444 C12H26O4S	MS2	M-H	95.952	47.08	0			0			0.17	0.33		0.77	46.5			46.5			46.5	46.5		46.5	0.98			0.9			0.96	0.93		0.95	0			0			0.55	0.53		0.75
6	Dodecyl sulfate; PlaSMA ID-444 C12H26O4S	MS2	M-H	114.927	47.08	0			0			0	0		0	46.5			46.5			46.5	46.5		46.5	0.98			0.9			0.96	0.93		0.95	0			0			0	0		0
6	Dodecyl sulfate; PlaSMA ID-444 C12H26O4S	MS2	M-H	96.6642	47.08	0			0			0	0		0	46.5			46.5			46.5	46.5		46.5	0.98			0.9			0.96	0.93		0.95	0			0			0	0		0
7	C14-SAS (TENTATIVE) C14H30O3S	MS1	M-H	277.184	51.1	813.81			814.76	1354.86		731.89				50.1			50.1	50.1		50.1				0.88			0.97	0.99		0.98				0.82			0.66	0.64		0.79
7	C14-SAS (TENTATIVE) C14H30O3S	MS2	M-H	79.9569	51.1	17.78			30.36	49.98		22.59				50.1			50.1	50.1		50.1				0.88			0.97	0.99		0.98				0.92			0.73	0.82		0.89
7	C14-SAS (TENTATIVE) C14H30O3S	MS2	M-H	277.185	51.1	8.3			7.05	18.13		3.46				50.1			50.1	50.1		50.1				0.88			0.97	0.99		0.98				0.82			0.66	0.6		0.79
7	C14-SAS (TENTATIVE) C14H30O3S	MS2	M-H	80.9645	51.1	0			0.3	1.07		0				50.1			50.1	50.1		50.1				0.88			0.97	0.99		0.98				0			0.46	0.64		0
7	C14-SAS (TENTATIVE) C14H30O3S	MS2	M-H	73.0302	51.1	0			0	0		0				50.1			50.1	50.1		50.1				0.88			0.97	0.99		0.98				0			0	0		0
8	13-Hydroperoxy-9Z,11E-octadecadienoic acid [M-H-H2O]- C18H32O4 NIST 1134465	MS1	M-H2O-H	293.212	64.95		1444.34	4757.6	4240.8	12098.1							64.8	64.8	64.8	64.8							0.76	0.8	0.63	0.82							0.68	0.88	0.62	0.79
8	13-Hydroperoxy-9Z,11E-octadecadienoic acid [M-H-H2O]- C18H32O4 NIST 1134465	MS2	M-H2O-H	293.207	64.95		3.94	8.9	5.75	25.43							64.8	64.8	64.8	64.8							0.76	0.8	0.63	0.82							0.71	0.93	0.89	0.87
8	13-Hydroperoxy-9Z,11E-octadecadienoic acid [M-H-H2O]- C18H32O4 NIST 1134465	MS2	M-H2O-H	57.0343	64.95		0.13	0.51	0	1.73							64.8	64.8	64.8	64.8							0.76	0.8	0.63	0.82							0.42	0.58	0	0.79
8	13-Hydroperoxy-9Z,11E-octadecadienoic acid [M-H-H2O]- C18H32O4 NIST 1134465	MS2	M-H2O-H	113.097	64.95		2.27	2.69	2.2	10.71							64.8	64.8	64.8	64.8							0.76	0.8	0.63	0.82							0.68	0.88	0.62	0.75
8	13-Hydroperoxy-9Z,11E-octadecadienoic acid [M-H-H2O]- C18H32O4 NIST 1134465	MS2	M-H2O-H	177.127	64.95		0	0	0	1.12							64.8	64.8	64.8	64.8							0.76	0.8	0.63	0.82							0	0	0	0.41
8	13-Hydroperoxy-9Z,11E-octadecadienoic acid [M-H-H2O]- C18H32O4 NIST 1134465	MS2	M-H2O-H	96.959	64.95		1.27	0.44	0	0.33							64.8	64.8	64.8	64.8							0.76	0.8	0.63	0.82							0.29	0.45	0	0.14
8	13-Hydroperoxy-9Z,11E-octadecadienoic acid [M-H-H2O]- C18H32O4 NIST 1134465	MS2	M-H2O-H	85.0696	64.95		0	0	0	0							64.8	64.8	64.8	64.8							0.76	0.8	0.63	0.82							0	0	0	0
8	13-Keto-9Z,11E-octadecadienoic acid [M-H]- C18H30O3 NIST 1137228---13-Keto-9Z,11E-octadecadienoic acid [M-H]- C18H30O3 NIST 1137229	MS1	M-H	293.212	64.56		1444.34	4757.6	4240.8	12098.1							64.8	64.8	64.8	64.8							0.74	0.83	0.68	0.93							0.68	0.88	0.62	0.79
8	13-Keto-9Z,11E-octadecadienoic acid [M-H]- C18H30O3 NIST 1137228---13-Keto-9Z,11E-octadecadienoic acid [M-H]- C18H30O3 NIST 1137229	MS2	M-H	293.209	64.56		3.94	8.9	6.14	25.43							64.8	64.8	64.8	64.8							0.74	0.83	0.68	0.93							0.71	0.93	0.9	0.87
8	13-Keto-9Z,11E-octadecadienoic acid [M-H]- C18H30O3 NIST 1137228---13-Keto-9Z,11E-octadecadienoic acid [M-H]- C18H30O3 NIST 1137229	MS2	M-H	195.139	64.56		0	1.49	0	5.04							64.8	64.8	64.8	64.8							0.74	0.83	0.68	0.93							0	0.22	0	0.64
8	13-Keto-9Z,11E-octadecadienoic acid [M-H]- C18H30O3 NIST 1137228---13-Keto-9Z,11E-octadecadienoic acid [M-H]- C18H30O3 NIST 1137229	MS2	M-H	81.9517	64.56		0	0	0	1.06							64.8	64.8	64.8	64.8							0.74	0.83	0.68	0.93							0	0	0	0.66
8	13-Keto-9Z,11E-octadecadienoic acid [M-H]- C18H30O3 NIST 1137228---13-Keto-9Z,11E-octadecadienoic acid [M-H]- C18H30O3 NIST 1137229	MS2	M-H	113.098	64.56		2.27	2.69	2.2	10.71							64.8	64.8	64.8	64.8							0.74	0.83	0.68	0.93							0.68	0.88	0.62	0.75
8	13-Keto-9Z,11E-octadecadienoic acid [M-H]- C18H30O3 NIST 1137228---13-Keto-9Z,11E-octadecadienoic acid [M-H]- C18H30O3 NIST 1137229	MS2	M-H	57.0391	64.56		0.13	0.51	0	1.73							64.8	64.8	64.8	64.8							0.74	0.83	0.68	0.93							0.42	0.58	0	0.79
9	12(13)-Epoxy-9Z-octadecenoic acid [M-H]- C18H32O3 NIST 1138353---12(13)-Epoxy-9Z-octadecenoic acid [M-H]- C18H32O3 NIST 1138354---13-HODE [M-H]- C18H32O3 NIST 1129343	MS1	M-H	295.227	61.71	586.78	2825.5	1645.76	1003.44	3328.65						62.3	61.1	62.3	62.3	62.3						0.81	0.86	0.88	0.78	0.88						0.58	0.78	0.69	0.57	0.75
9	12(13)-Epoxy-9Z-octadecenoic acid [M-H]- C18H32O3 NIST 1138353---12(13)-Epoxy-9Z-octadecenoic acid [M-H]- C18H32O3 NIST 1138354---13-HODE [M-H]- C18H32O3 NIST 1129343	MS2	M-H	277.219	61.71	1.41	10.91	6.24	3.01	9.76						62.3	61.1	62.3	62.3	62.3						0.81	0.86	0.88	0.78	0.88						0.72	0.81	0.85	0.82	0.77
9	12(13)-Epoxy-9Z-octadecenoic acid [M-H]- C18H32O3 NIST 1138353---12(13)-Epoxy-9Z-octadecenoic acid [M-H]- C18H32O3 NIST 1138354---13-HODE [M-H]- C18H32O3 NIST 1129343	MS2	M-H	195.139	61.71	0.16	5.67	1.49	0.78	5.39						62.3	61.1	62.3	62.3	62.3						0.81	0.86	0.88	0.78	0.88						0.54	0.51	0.68	0.57	0.75
9	12(13)-Epoxy-9Z-octadecenoic acid [M-H]- C18H32O3 NIST 1138353---12(13)-Epoxy-9Z-octadecenoic acid [M-H]- C18H32O3 NIST 1138354---13-HODE [M-H]- C18H32O3 NIST 1129343	MS2	M-H	177.128	61.71	0	0	0	0	1.12						62.3	61.1	62.3	62.3	62.3						0.81	0.86	0.88	0.78	0.88						0	0	0	0	0.36
9	12(13)-Epoxy-9Z-octadecenoic acid [M-H]- C18H32O3 NIST 1138353---12(13)-Epoxy-9Z-octadecenoic acid [M-H]- C18H32O3 NIST 1138354---13-HODE [M-H]- C18H32O3 NIST 1129343	MS2	M-H	95.0524	61.71	0	0	0	0	0						62.3	61.1	62.3	62.3	62.3						0.81	0.86	0.88	0.78	0.88						0	0	0	0	0
9	12(13)-Epoxy-9Z-octadecenoic acid [M-H]- C18H32O3 NIST 1138353---12(13)-Epoxy-9Z-octadecenoic acid [M-H]- C18H32O3 NIST 1138354---13-HODE [M-H]- C18H32O3 NIST 1129343	MS2	M-H	113.095	61.71	0.54	2.27	2.69	2.2	10.71						62.3	61.1	62.3	62.3	62.3						0.81	0.86	0.88	0.78	0.88						0.58	0.78	0.69	0.56	0.71
9	9,10-Dihydroxy-12Z-octadecenoic acid [M-H-H2O]- C18H34O4 NIST 1142687---Unknown (carbon number 18); PlaSMA ID-572 C18H34O4	MS1	M-H2O-H	295.227	62.14	586.78	2825.5	1645.76	1003.44	3328.65						62.3	61.1	62.3	62.3	62.3						0.88	0.88	0.94	0.98	0.91						0.61	0.79	0.85	0.54	0.73
9	9,10-Dihydroxy-12Z-octadecenoic acid [M-H-H2O]- C18H34O4 NIST 1142687---Unknown (carbon number 18); PlaSMA ID-572 C18H34O4	MS2	M-H2O-H	277.218	62.14	1.41	10.91	6.24	3.01	9.76						62.3	61.1	62.3	62.3	62.3						0.88	0.88	0.94	0.98	0.91						0.72	0.81	0.85	0.82	0.77
9	9,10-Dihydroxy-12Z-octadecenoic acid [M-H-H2O]- C18H34O4 NIST 1142687---Unknown (carbon number 18); PlaSMA ID-572 C18H34O4	MS2	M-H2O-H	171.102	62.14	0.74	4.17	2.64	0.81	2.35						62.3	61.1	62.3	62.3	62.3						0.88	0.88	0.94	0.98	0.91						0.38	0.79	0.85	0.54	0.64
9	9,10-Dihydroxy-12Z-octadecenoic acid [M-H-H2O]- C18H34O4 NIST 1142687---Unknown (carbon number 18); PlaSMA ID-572 C18H34O4	MS2	M-H2O-H	57.0359	62.14	0.09	0	0.51	0.47	1.73						62.3	61.1	62.3	62.3	62.3						0.88	0.88	0.94	0.98	0.91						0.54	0	0.32	0.45	0.73
9	9,10-Dihydroxy-12Z-octadecenoic acid [M-H-H2O]- C18H34O4 NIST 1142687---Unknown (carbon number 18); PlaSMA ID-572 C18H34O4	MS2	M-H2O-H	67.0203	62.14	0	0	0.37	0.18	0						62.3	61.1	62.3	62.3	62.3						0.88	0.88	0.94	0.98	0.91						0	0	0.55	0.54	0
9	9,10-Dihydroxy-12Z-octadecenoic acid [M-H-H2O]- C18H34O4 NIST 1142687---Unknown (carbon number 18); PlaSMA ID-572 C18H34O4	MS2	M-H2O-H	111.008	62.14	1.48	3.2	1.31	0.77	2.44						62.3	61.1	62.3	62.3	62.3						0.88	0.88	0.94	0.98	0.91						0.61	0.42	0.63	0.47	0.25
10	C10-LAS (STANDARD MIX) C16H26O3S	MS1	M-H	297.152	50.01	760.11	565.09	248.76	709.75	371.98	1160.12	982.18	999.39	394.63	1126.1	50.1	50.1	50.1	50.1	50.1	50.1	50.1	50.1	50.1	50.1	0.97	0.88	0.93	0.96	0.95	0.97	0.98	0.97	0.93	0.98	0.95	0.85	0.84	0.89	0.9	0.97	0.91	0.97	0.92	0.95
10	C10-LAS (STANDARD MIX) C16H26O3S	MS2	M-H	183.012	50.01	90.17	62.33	27.34	85.46	27.51	128.09	110.35	117.16	38.78	97.57	50.1	50.1	50.1	50.1	50.1	50.1	50.1	50.1	50.1	50.1	0.97	0.88	0.93	0.96	0.95	0.97	0.98	0.97	0.93	0.98	0.96	0.94	0.91	0.96	0.9	0.98	0.98	0.98	0.98	0.97
10	C10-LAS (STANDARD MIX) C16H26O3S	MS2	M-H	119.05	50.01	6.4	3.49	1.66	3.97	3	8.42	9.24	7.27	2.33	7.97	50.1	50.1	50.1	50.1	50.1	50.1	50.1	50.1	50.1	50.1	0.97	0.88	0.93	0.96	0.95	0.97	0.98	0.97	0.93	0.98	0.82	0.85	0.78	0.89	0.81	0.94	0.81	0.96	0.6	0.82
10	C10-LAS (STANDARD MIX) C16H26O3S	MS2	M-H	297.153	50.01	21.42	30.93	9.35	37.03	13.69	30.94	21.03	27.94	19.55	27.44	50.1	50.1	50.1	50.1	50.1	50.1	50.1	50.1	50.1	50.1	0.97	0.88	0.93	0.96	0.95	0.97	0.98	0.97	0.93	0.98	0.95	0.72	0.84	0.68	0.93	0.97	0.91	0.97	0.92	0.95
10	C10-LAS (STANDARD MIX) C16H26O3S	MS2	M-H	79.9573	50.01	0.1	0	0.4	1.06	0	1.11	1.05	1.46	0.4	0.2	50.1	50.1	50.1	50.1	50.1	50.1	50.1	50.1	50.1	50.1	0.97	0.88	0.93	0.96	0.95	0.97	0.98	0.97	0.93	0.98	0.46	0	0.35	0.19	0	0.57	0.81	0.87	0.49	0.35
10	C10-LAS (STANDARD MIX) C16H26O3S	MS2	M-H	197.028	50.01	1.66	2.14	0.55	1.82	0	1.82	0.79	4.81	1.43	3.55	50.1	50.1	50.1	50.1	50.1	50.1	50.1	50.1	50.1	50.1	0.97	0.88	0.93	0.96	0.95	0.97	0.98	0.97	0.93	0.98	0.32	0.79	0.55	0.46	0	0.81	0.69	0.81	0.72	0.7
10	C10-LAS (STANDARD MIX) C16H26O3S	MS2	M-H	170.004	50.01	2.93	0.15	0	1.33	0	1.69	0.59	2.13	0.88	0.59	50.1	50.1	50.1	50.1	50.1	50.1	50.1	50.1	50.1	50.1	0.97	0.88	0.93	0.96	0.95	0.97	0.98	0.97	0.93	0.98	0.88	0.42	0	0.68	0	0.67	0.61	0.83	0.69	0.5
11	C11-LAS (STANDARD MIX) C17H28O3S	MS1	M-H	311.168	66.11	2687.39	1977.49	1065.07	2947.84	1462.98	3819	3069.46	3185.01	1395.42	3630.25	66	66	66	66	66	66	66	66	66	66	0.94	0.97	0.94	0.99	0.98	0.98	0.98	0.99	0.9	0.99	0.95	0.95	0.9	0.94	0.97	0.96	0.99	0.95	0.88	0.98
11	C11-LAS (STANDARD MIX) C17H28O3S	MS2	M-H	183.012	66.11	367.49	239.62	158.46	396.09	191.79	456.36	406.73	411.92	176.19	428.63	66	66	66	66	66	66	66	66	66	66	0.94	0.97	0.94	0.99	0.98	0.98	0.98	0.99	0.9	0.99	0.97	0.97	0.9	0.94	0.99	0.99	0.99	0.95	0.96	0.98
11	C11-LAS (STANDARD MIX) C17H28O3S	MS2	M-H	119.05	66.11	21.17	13.73	9.52	28.26	10.53	29.16	30.37	28.78	9.03	28.54	66	66	66	66	66	66	66	66	66	66	0.94	0.97	0.94	0.99	0.98	0.98	0.98	0.99	0.9	0.99	0.95	0.94	0.93	0.92	0.97	0.96	0.92	0.9	0.88	0.93
11	C11-LAS (STANDARD MIX) C17H28O3S	MS2	M-H	311.168	66.11	142.97	65.2	58.98	106.34	60.1	181.66	117.6	107.32	69.43	121.08	66	66	66	66	66	66	66	66	66	66	0.94	0.97	0.94	0.99	0.98	0.98	0.98	0.99	0.9	0.99	0.88	0.95	0.81	0.95	0.96	0.95	0.99	0.95	0.75	0.99
11	C11-LAS (STANDARD MIX) C17H28O3S	MS2	M-H	79.9567	66.11	3.14	0.71	1.11	2.11	0.63	4.76	2.31	5.22	1.56	2.05	66	66	66	66	66	66	66	66	66	66	0.94	0.97	0.94	0.99	0.98	0.98	0.98	0.99	0.9	0.99	0.82	0.56	0.59	0.57	0.72	0.91	0.68	0.83	0.75	0.67
11	C11-LAS (STANDARD MIX) C17H28O3S	MS2	M-H	170.004	66.11	5.18	2.05	1.35	5.63	1.84	6.35	8.62	6.34	1.4	7.35	66	66	66	66	66	66	66	66	66	66	0.94	0.97	0.94	0.99	0.98	0.98	0.98	0.99	0.9	0.99	0.93	0.6	0.46	0.88	0.7	0.88	0.91	0.73	0.47	0.75
11	C11-LAS (STANDARD MIX) C17H28O3S	MS2	M-H	195.012	66.11	0	0	0	0.79	0	0	0.95	0.32	0	0.79	66	66	66	66	66	66	66	66	66	66	0.94	0.97	0.94	0.99	0.98	0.98	0.98	0.99	0.9	0.99	0	0	0	0.53	0	0	0.55	0.54	0	0.31
12	FA 18:1+3O; PlaSMA ID-735 C18H34O5	MS1	M-H2O-H	311.222	33.49		832.94	900.99	721.22	1730.27		11.44					34.2	34.3	34.3	34.3		33.5					0.96	0.99	0.86	0.99		0.87					0.62	0.67	0.64	0.76		0.58
12	FA 18:1+3O; PlaSMA ID-735 C18H34O5	MS2	M-H2O-H	183.012	33.49		36.11	30.63	31.19	31.35		40.67					34.2	34.3	34.3	34.3		33.5					0.96	0.99	0.86	0.99		0.87					0.62	0.76	0.69	0.76		0.58
12	FA 18:1+3O; PlaSMA ID-735 C18H34O5	MS2	M-H2O-H	311.177	33.49		4.75	3.37	0	4.08		8.44					34.2	34.3	34.3	34.3		33.5					0.96	0.99	0.86	0.99		0.87					0.32	0.56	0	0.63		0.59
12	FA 18:1+3O; PlaSMA ID-735 C18H34O5	MS2	M-H2O-H	171.102	33.49		3.31	2.65	4.35	5.13		0					34.2	34.3	34.3	34.3		33.5					0.96	0.99	0.86	0.99		0.87					0.7	0.67	0.64	0.82		0
13	FAHFA 18:0; FAHFA 16:0/2:0; [M-H]- C18H34O4	MS1	M-H	313.238	102.8	639.39	1556.5	3029.93	1182.78	2328.62	97.11	186.59	168.58	192.27	236.74	102.6	102.6	102.6	102.6	102.6	102.6	102.6	102.6	102.6	102.6	0.96	1	0.97	0.97	0.99	0.71	0.96	0.96	0.82	0.89	0.91	0.94	0.76	0.79	0.92	0.68	0.64	0.71	0.75	0.68
13	FAHFA 18:0; FAHFA 16:0/2:0; [M-H]- C18H34O4	MS2	M-H	75.0083	102.8	5.12	9.75	30.84	34.95	32.15	0.49	1.89	1.07	1.36	1.11	102.6	102.6	102.6	102.6	102.6	102.6	102.6	102.6	102.6	102.6	0.96	1	0.97	0.97	0.99	0.71	0.96	0.96	0.82	0.89	0.97	0.94	0.83	0.73	0.98	0.86	0.64	0.71	0.69	0.81
13	FAHFA 18:0; FAHFA 16:0/2:0; [M-H]- C18H34O4	MS2	M-H	255.233	102.8	10.56	14.57	74.69	18.31	41.41	0.72	5	1.25	2.86	1.43	102.6	102.6	102.6	102.6	102.6	102.6	102.6	102.6	102.6	102.6	0.96	1	0.97	0.97	0.99	0.71	0.96	0.96	0.82	0.89	0.91	0.98	0.76	0.89	0.92	0.61	0.9	0.78	0.84	0.68
13	FAHFA 18:0; FAHFA 16:0/2:0; [M-H]- C18H34O4	MS2	M-H	185.012	102.8	1.96	1.6	0.31	2.13	2.76	1.61	1.23	0.92	1.97	0.99	102.6	102.6	102.6	102.6	102.6	102.6	102.6	102.6	102.6	102.6	0.96	1	0.97	0.97	0.99	0.71	0.96	0.96	0.82	0.89	0.6	0.22	0.31	0.79	0.72	0.68	0.54	0.59	0.75	0.43
13	FAHFA 18:0; FAHFA 16:0/2:0; [M-H]- C18H34O4	MS2	M-H	72.9917	102.8	0	0.1	0.38	0.29	0.53	0	0	0	0	0	102.6	102.6	102.6	102.6	102.6	102.6	102.6	102.6	102.6	102.6	0.96	1	0.97	0.97	0.99	0.71	0.96	0.96	0.82	0.89	0	0.55	0.71	0.58	0.16	0	0	0	0	0
14	4-Dodecylbenzenesulfonic Acid C18H30O3S MoNA 440645---Dodecylbenzenesulfonic acid C18H30O3S	MS1	M-H	325.184	81.86	2714.24	2245.06	1301.88	2908.78	1524.44	4179.55	3350.46	3617.93	1550.69	3741	81.8	81.8	81.8	81.8	81.8	81.8	81.8	81.8	81.8	81.8	0.96	0.96	0.97	0.89	0.94	0.96	0.98	0.96	0.95	0.88	0.99	0.97	0.93	0.9	0.9	0.98	0.95	0.97	0.91	0.92
14	4-Dodecylbenzenesulfonic Acid C18H30O3S MoNA 440645---Dodecylbenzenesulfonic acid C18H30O3S	MS2	M-H	183.011	81.86	311.33	253.45	192.4	293.62	192.55	414.44	474.93	433.9	221.19	465.02	81.8	81.8	81.8	81.8	81.8	81.8	81.8	81.8	81.8	81.8	0.96	0.96	0.97	0.89	0.94	0.96	0.98	0.96	0.95	0.88	0.99	0.97	0.93	0.96	0.83	0.99	0.95	0.98	0.99	0.98
14	4-Dodecylbenzenesulfonic Acid C18H30O3S MoNA 440645---Dodecylbenzenesulfonic acid C18H30O3S	MS2	M-H	325.186	81.86	134.47	105.77	52.41	235.56	65.54	178.02	175.88	200.18	109.92	349.19	81.8	81.8	81.8	81.8	81.8	81.8	81.8	81.8	81.8	81.8	0.96	0.96	0.97	0.89	0.94	0.96	0.98	0.96	0.95	0.88	1	0.97	0.96	0.74	0.9	0.97	0.89	0.97	0.91	0.9
14	4-Dodecylbenzenesulfonic Acid C18H30O3S MoNA 440645---Dodecylbenzenesulfonic acid C18H30O3S	MS2	M-H	119.051	81.86	15.99	11.79	12	14.59	11.19	28.24	25.84	22.82	10.33	25.95	81.8	81.8	81.8	81.8	81.8	81.8	81.8	81.8	81.8	81.8	0.96	0.96	0.97	0.89	0.94	0.96	0.98	0.96	0.95	0.88	0.93	0.88	0.83	0.88	0.93	0.98	0.94	0.97	0.86	0.92
14	4-Dodecylbenzenesulfonic Acid C18H30O3S MoNA 440645---Dodecylbenzenesulfonic acid C18H30O3S	MS2	M-H	184.021	81.86	41.35	28.6	23.97	38.94	21.48	49.01	62.97	49.22	25.6	66.03	81.8	81.8	81.8	81.8	81.8	81.8	81.8	81.8	81.8	81.8	0.96	0.96	0.97	0.89	0.94	0.96	0.98	0.96	0.95	0.88	0.95	0.92	0.84	0.9	0.86	0.95	0.97	0.97	0.85	0.9
14	4-Dodecylbenzenesulfonic Acid C18H30O3S MoNA 440645---Dodecylbenzenesulfonic acid C18H30O3S	MS2	M-H	197.028	81.86	12.41	6.96	6.06	10.82	8.15	9.35	18.98	13.48	7.73	11.7	81.8	81.8	81.8	81.8	81.8	81.8	81.8	81.8	81.8	81.8	0.96	0.96	0.97	0.89	0.94	0.96	0.98	0.96	0.95	0.88	0.71	0.78	0.43	0.84	0.65	0.73	0.7	0.74	0.61	0.77
14	4-Dodecylbenzenesulfonic Acid C18H30O3S MoNA 440645---Dodecylbenzenesulfonic acid C18H30O3S	MS2	M-H	239.078	81.86	3.3	1.47	1.57	3.58	0	5.21	4.67	4.92	2.6	4.75	81.8	81.8	81.8	81.8	81.8	81.8	81.8	81.8	81.8	81.8	0.96	0.96	0.97	0.89	0.94	0.96	0.98	0.96	0.95	0.88	0.83	0.7	0.26	0.73	0	0.82	0.78	0.71	0.77	0.81
15	2,3-Dinor 11.beta.-prostaglandin F2.alpha. [M-H]- C18H30O5 NIST 1134960	MS1	M-H	325.2	20.06		180.32	140.99		332.75							19.6	20.8		20.8							0.95	0.87		0.91							0.52	0.62		0.64
15	2,3-Dinor 11.beta.-prostaglandin F2.alpha. [M-H]- C18H30O5 NIST 1134960	MS2	M-H	183.011	20.06		31.85	23.06		25.39							19.6	20.8		20.8							0.95	0.87		0.91							0.59	0.62		0.71
15	2,3-Dinor 11.beta.-prostaglandin F2.alpha. [M-H]- C18H30O5 NIST 1134960	MS2	M-H	119.052	20.06		2.15	1.23		2.52							19.6	20.8		20.8							0.95	0.87		0.91							0.52	0.27		0.31
15	2,3-Dinor 11.beta.-prostaglandin F2.alpha. [M-H]- C18H30O5 NIST 1134960	MS2	M-H	325.183	20.06		9.25	11.73		8.91							19.6	20.8		20.8							0.95	0.87		0.91							0.32	0.47		0.43
15	2,3-Dinor 11.beta.-prostaglandin F2.alpha. [M-H]- C18H30O5 NIST 1134960	MS2	M-H	184.02	20.06		4.31	8.08		3.97							19.6	20.8		20.8							0.95	0.87		0.91							0.47	0.66		0.64
16	Linoleic acid C18H32O2 MoNA 436606	MS1	M+HCOO	325.237	134.98	30.41	19.54	31.28	36.1	67.69				4.55		134.3	135	134.3	135.5	135				135		0.98	0.99	0.99	0.98	0.98				0.52		0.98	0.95	0.93	0.97	0.79				0.61
16	Linoleic acid C18H32O2 MoNA 436606	MS2	M+HCOO	279.233	134.98	352.51	175.71	292	417.9	1210.93				0		134.3	135	134.3	135.5	135				135		0.98	0.99	0.99	0.98	0.98				0.52		0.99	0.97	0.88	0.99	0.79				0
16	Linoleic acid C18H32O2 MoNA 436606	MS2	M+HCOO	183.013	134.98	55.07	168.06	42.72	62.12	360.49				120.38		134.3	135	134.3	135.5	135				135		0.98	0.99	0.99	0.98	0.98				0.52		0.97	0.51	0.9	0.92	0.59				0.61
16	Linoleic acid C18H32O2 MoNA 436606	MS2	M+HCOO	325.186	134.98	16.61	45.04	9.02	16.38	90.6				29.44		134.3	135	134.3	135.5	135				135		0.98	0.99	0.99	0.98	0.98				0.52		0.98	0.58	0.98	0.97	0.59				0.68
16	Linoleic acid C18H32O2 MoNA 436606	MS2	M+HCOO	261.226	134.98	3.12	1.1	1.72	5.24	10.88				0		134.3	135	134.3	135.5	135				135		0.98	0.99	0.99	0.98	0.98				0.52		0.96	0.95	0.93	0.88	0.92				0
16	Linoleic acid C18H32O2 MoNA 436606	MS2	M+HCOO	197.026	134.98	1.29	6.95	2.82	3.55	15.46				0		134.3	135	134.3	135.5	135				135		0.98	0.99	0.99	0.98	0.98				0.52		0.96	0.57	0.71	0.67	0.52				0
16	Linoleic acid C18H32O2 MoNA 436606	MS2	M+HCOO	184.017	134.98	11.1	22.63	4.47	10.05	51.88				17.31		134.3	135	134.3	135.5	135				135		0.98	0.99	0.99	0.98	0.98				0.52		0.96	0.35	0.7	0.88	0.65				0.46
17	Heneicosanoic acid C21H42O2	MS1	M-H	325.31	182.4	12	49.81	38.71	29.32	47.19				33.66	29.29	182.4	181.9	183.1	183.1	181.9				183.1	183.1	0.94	0.98	0.97	0.96	0.96				0.98	0.96	0.52	0.87	0.83	0.86	0.84				0.68	0.79
17	Heneicosanoic acid C21H42O2	MS2	M-H	183.012	182.4	143.95	54.2	40.38	46.21	50.45				43.16	65.24	182.4	181.9	183.1	183.1	181.9				183.1	183.1	0.94	0.98	0.97	0.96	0.96				0.98	0.96	0.45	0.89	0.83	0.86	0.84				0.88	0.79
17	Heneicosanoic acid C21H42O2	MS2	M-H	197.029	182.4	2.53	2.24	2.76	1.97	1.03				1.43	2.84	182.4	181.9	183.1	183.1	181.9				183.1	183.1	0.94	0.98	0.97	0.96	0.96				0.98	0.96	0.27	0.68	0.83	0.22	0.65				0.58	0.79
17	Heneicosanoic acid C21H42O2	MS2	M-H	119.051	182.4	9.5	3.43	2.06	1.99	3.03				3.45	2.33	182.4	181.9	183.1	183.1	181.9				183.1	183.1	0.94	0.98	0.97	0.96	0.96				0.98	0.96	0.34	0.87	0.48	0.55	0.91				0.57	0.36
17	Heneicosanoic acid C21H42O2	MS2	M-H	325.186	182.4	46.84	14.63	9.7	10.63	14.17				12.8	15.77	182.4	181.9	183.1	183.1	181.9				183.1	183.1	0.94	0.98	0.97	0.96	0.96				0.98	0.96	0.52	0.71	0.71	0.94	0.79				0.68	0.48
17	Heneicosanoic acid C21H42O2	MS2	M-H	184.02	182.4	24.98	5.73	5.09	6.98	6.12				6.03	8.58	182.4	181.9	183.1	183.1	181.9				183.1	183.1	0.94	0.98	0.97	0.96	0.96				0.98	0.96	0.54	0.73	0.44	0.63	0.8				0.63	0.53
18	cis-4,7,10,13,16,19-Docosahexaenoic acid [M-H]- C22H32O2 NIST 1133565---cis-4,7,10,13,16,19-Docosahexaenoic acid [M-H]- C22H32O2 NIST 1133566---cis-4,7,10,13,16,19-Docosahexaenoic acid [M-H]- C22H32O2 NIST 1133567	MS1	M-H	327.233	125.86	22939	5115.34	11205.4	13467.4	32330						125.8	125.8	125.8	125.8	125.8						0.95	0.79	0.95	0.94	0.99						0.9	0.75	0.87	0.85	0.93
18	cis-4,7,10,13,16,19-Docosahexaenoic acid [M-H]- C22H32O2 NIST 1133565---cis-4,7,10,13,16,19-Docosahexaenoic acid [M-H]- C22H32O2 NIST 1133566---cis-4,7,10,13,16,19-Docosahexaenoic acid [M-H]- C22H32O2 NIST 1133567	MS2	M-H	59.0136	125.86	17.97	1.54	8.48	8.62	29.58						125.8	125.8	125.8	125.8	125.8						0.95	0.79	0.95	0.94	0.99						0.98	0.98	0.94	0.96	0.97
18	cis-4,7,10,13,16,19-Docosahexaenoic acid [M-H]- C22H32O2 NIST 1133565---cis-4,7,10,13,16,19-Docosahexaenoic acid [M-H]- C22H32O2 NIST 1133566---cis-4,7,10,13,16,19-Docosahexaenoic acid [M-H]- C22H32O2 NIST 1133567	MS2	M-H	327.182	125.86	0	0	0.82	0	0.81						125.8	125.8	125.8	125.8	125.8						0.95	0.79	0.95	0.94	0.99						0	0	0.23	0	0.48
18	cis-4,7,10,13,16,19-Docosahexaenoic acid [M-H]- C22H32O2 NIST 1133565---cis-4,7,10,13,16,19-Docosahexaenoic acid [M-H]- C22H32O2 NIST 1133566---cis-4,7,10,13,16,19-Docosahexaenoic acid [M-H]- C22H32O2 NIST 1133567	MS2	M-H	185.009	125.86	2.42	1.69	1.45	2.2	1.83						125.8	125.8	125.8	125.8	125.8						0.95	0.79	0.95	0.94	0.99						0.41	0.75	0.78	0.39	0.86
18	cis-4,7,10,13,16,19-Docosahexaenoic acid [M-H]- C22H32O2 NIST 1133565---cis-4,7,10,13,16,19-Docosahexaenoic acid [M-H]- C22H32O2 NIST 1133566---cis-4,7,10,13,16,19-Docosahexaenoic acid [M-H]- C22H32O2 NIST 1133567	MS2	M-H	107.086	125.86	0.23	0	0	0.46	0.81						125.8	125.8	125.8	125.8	125.8						0.95	0.79	0.95	0.94	0.99						0.34	0	0	0.27	0.75
18	cis-4,7,10,13,16,19-Docosahexaenoic acid [M-H]- C22H32O2 NIST 1133565---cis-4,7,10,13,16,19-Docosahexaenoic acid [M-H]- C22H32O2 NIST 1133566---cis-4,7,10,13,16,19-Docosahexaenoic acid [M-H]- C22H32O2 NIST 1133567	MS2	M-H	175.15	125.86	0.15	0	0	0.15	1.18						125.8	125.8	125.8	125.8	125.8						0.95	0.79	0.95	0.94	0.99						0.9	0	0	0.85	0.88
18	cis-4,7,10,13,16,19-Docosahexaenoic acid [M-H]- C22H32O2 NIST 1133565---cis-4,7,10,13,16,19-Docosahexaenoic acid [M-H]- C22H32O2 NIST 1133566---cis-4,7,10,13,16,19-Docosahexaenoic acid [M-H]- C22H32O2 NIST 1133567	MS2	M-H	135.12	125.86	0.85	0	0.39	0	1.17						125.8	125.8	125.8	125.8	125.8						0.95	0.79	0.95	0.94	0.99						0.9	0	0.87	0	0.93
19	Elaidic acid C18H34O2 MoNA 440469---Oleic acid C18H34O2 MoNA 440469---Trans-Vaccenic acid C18H34O2	MS1	M+HCOO	327.253	153.65	76.51	41.64	127.39	116.93	113.26						152.6	152.6	152.6	152.6	152.6						1	0.99	0.99	1	1						0.94	0.72	0.92	0.92	0.98
19	Elaidic acid C18H34O2 MoNA 440469---Oleic acid C18H34O2 MoNA 440469---Trans-Vaccenic acid C18H34O2	MS2	M+HCOO	281.249	153.65	561.59	246.96	760.62	764.41	880.4						152.6	152.6	152.6	152.6	152.6						1	0.99	0.99	1	1						1	0.98	0.98	0.94	0.84
19	Elaidic acid C18H34O2 MoNA 440469---Oleic acid C18H34O2 MoNA 440469---Trans-Vaccenic acid C18H34O2	MS2	M+HCOO	185.008	153.65	2.89	1.48	3.23	2.89	2.66						152.6	152.6	152.6	152.6	152.6						1	0.99	0.99	1	1						0.92	0.72	0.92	0.58	0.8
19	Elaidic acid C18H34O2 MoNA 440469---Oleic acid C18H34O2 MoNA 440469---Trans-Vaccenic acid C18H34O2	MS2	M+HCOO	281.226	153.65	0	0	0	0	0						152.6	152.6	152.6	152.6	152.6						1	0.99	0.99	1	1						0	0	0	0	0
19	Elaidic acid C18H34O2 MoNA 440469---Oleic acid C18H34O2 MoNA 440469---Trans-Vaccenic acid C18H34O2	MS2	M+HCOO	327.172	153.65	2.15	0	0.2	1.01	2.83						152.6	152.6	152.6	152.6	152.6						1	0.99	0.99	1	1						0.94	0	0.3	0.91	0.98
19	Elaidic acid C18H34O2 MoNA 440469---Oleic acid C18H34O2 MoNA 440469---Trans-Vaccenic acid C18H34O2	MS2	M+HCOO	199.021	153.65	0	0	0	0	0						152.6	152.6	152.6	152.6	152.6						1	0.99	0.99	1	1						0	0	0	0	0
19	Elaidic acid C18H34O2 MoNA 440469---Oleic acid C18H34O2 MoNA 440469---Trans-Vaccenic acid C18H34O2	MS2	M+HCOO	185.023	153.65	3.27	0	0	2.06	1.22						152.6	152.6	152.6	152.6	152.6						1	0.99	0.99	1	1						0.82	0	0	0.92	0.98
20	FA 18:1+3O; PlaSMA ID-735 C18H34O5---FA 18:1+3O; PlaSMA ID-738 C18H34O5	MS1	M-H	329.233	20.78	258.96	2178.5	789.26	439.96	1459.24						22	20.8	20.8	20.8	20.8						0.77	0.97	0.91	0.88	0.97						0.52	0.9	0.74	0.64	0.84
20	FA 18:1+3O; PlaSMA ID-735 C18H34O5---FA 18:1+3O; PlaSMA ID-738 C18H34O5	MS2	M-H	171.101	20.78	1.55	12.96	4.91	1.18	8.06						22	20.8	20.8	20.8	20.8						0.77	0.97	0.91	0.88	0.97						0.52	0.9	0.9	0.8	0.84
20	FA 18:1+3O; PlaSMA ID-735 C18H34O5---FA 18:1+3O; PlaSMA ID-738 C18H34O5	MS2	M-H	139.112	20.78	0	6.12	1.73	0.8	3.7						22	20.8	20.8	20.8	20.8						0.77	0.97	0.91	0.88	0.97						0	0.65	0.68	0.35	0.68
20	FA 18:1+3O; PlaSMA ID-735 C18H34O5---FA 18:1+3O; PlaSMA ID-738 C18H34O5	MS2	M-H	211.133	20.78	1.23	8.24	1.97	0.65	5.81						22	20.8	20.8	20.8	20.8						0.77	0.97	0.91	0.88	0.97						0.77	0.87	0.69	0.53	0.82
20	FA 18:1+3O; PlaSMA ID-735 C18H34O5---FA 18:1+3O; PlaSMA ID-738 C18H34O5	MS2	M-H	329.234	20.78	0.72	9.43	1.82	1.95	6.09						22	20.8	20.8	20.8	20.8						0.77	0.97	0.91	0.88	0.97						0.52	0.96	0.74	0.64	0.89
20	FA 18:1+3O; PlaSMA ID-735 C18H34O5---FA 18:1+3O; PlaSMA ID-738 C18H34O5	MS2	M-H	229.144	20.78	0	1.96	0	0	1.88						22	20.8	20.8	20.8	20.8						0.77	0.97	0.91	0.88	0.97						0	0.4	0	0	0.7
20	FA 18:1+3O; PlaSMA ID-735 C18H34O5---FA 18:1+3O; PlaSMA ID-738 C18H34O5	MS2	M-H	183.14	20.78	0	1.97	0	0	0.61						22	20.8	20.8	20.8	20.8						0.77	0.97	0.91	0.88	0.97						0	0.55	0	0	0.47
21	Carbocyclic thromboxane A2 [M-H]- C22H36O3 NIST 1207545	MS1	M-H2O-H	329.248	139.52					6761.93										139.2										0.93										0.79
21	Carbocyclic thromboxane A2 [M-H]- C22H36O3 NIST 1207545	MS2	M-H2O-H	329.251	139.52					4.06										139.2										0.93										0.84
21	Carbocyclic thromboxane A2 [M-H]- C22H36O3 NIST 1207545	MS2	M-H2O-H	59.0131	139.52					1.41										139.2										0.93										0.49
21	Carbocyclic thromboxane A2 [M-H]- C22H36O3 NIST 1207545	MS2	M-H2O-H	205.123	139.52					0										139.2										0.93										0
21	Carbocyclic thromboxane A2 [M-H]- C22H36O3 NIST 1207545	MS2	M-H2O-H	71.0128	139.52					1.05										139.2										0.93										0.79
22	Stearic acid C18H36O2 Bruker-Sumner MetaboBASE Plant Library 373951---Stearic acid C18H36O2 MoNA 440441---Stearic acid C18H36O2 MoNA 440442	MS1	M+HCOO	329.269	172.14	63.68	84.7	69.58	78.13	80.96	74.48	58.15	66.11	53.05	68.6	172.2	172.1	172.2	172.2	172.2	172.2	172.2	172.2	172.2	172.2	0.95	0.93	0.94	0.93	0.91	0.95	0.94	0.92	0.94	0.92	0.93	0.96	0.95	0.99	0.9	0.99	0.95	0.98	0.99	0.97
22	Stearic acid C18H36O2 Bruker-Sumner MetaboBASE Plant Library 373951---Stearic acid C18H36O2 MoNA 440441---Stearic acid C18H36O2 MoNA 440442	MS2	M+HCOO	283.264	172.14	180.91	259.68	187.57	227.33	212.54	178.32	201.49	186.82	141.03	154.02	172.2	172.1	172.2	172.2	172.2	172.2	172.2	172.2	172.2	172.2	0.95	0.93	0.94	0.93	0.91	0.95	0.94	0.92	0.94	0.92	0.95	0.97	0.99	0.99	0.95	0.99	0.99	0.99	0.99	0.99
22	Stearic acid C18H36O2 Bruker-Sumner MetaboBASE Plant Library 373951---Stearic acid C18H36O2 MoNA 440441---Stearic acid C18H36O2 MoNA 440442	MS2	M+HCOO	265.255	172.14	2.92	1.29	0.55	1.19	0	0.74	0.92	0.18	0	0	172.2	172.1	172.2	172.2	172.2	172.2	172.2	172.2	172.2	172.2	0.95	0.93	0.94	0.93	0.91	0.95	0.94	0.92	0.94	0.92	0.87	0.56	0.92	0.57	0	0.83	0.56	0.23	0	0
22	Stearic acid C18H36O2 Bruker-Sumner MetaboBASE Plant Library 373951---Stearic acid C18H36O2 MoNA 440441---Stearic acid C18H36O2 MoNA 440442	MS2	M+HCOO	284.269	172.14	28.76	50.9	30.4	48.91	42.3	29.74	35.23	34.05	23.61	31.27	172.2	172.1	172.2	172.2	172.2	172.2	172.2	172.2	172.2	172.2	0.95	0.93	0.94	0.93	0.91	0.95	0.94	0.92	0.94	0.92	0.93	0.96	0.95	0.99	0.9	0.99	0.95	0.98	0.99	0.97
22	Stearic acid C18H36O2 Bruker-Sumner MetaboBASE Plant Library 373951---Stearic acid C18H36O2 MoNA 440441---Stearic acid C18H36O2 MoNA 440442	MS2	M+HCOO	282.392	172.14	1.14	0	0	0	2.09	0	0.57	2.08	0	0	172.2	172.1	172.2	172.2	172.2	172.2	172.2	172.2	172.2	172.2	0.95	0.93	0.94	0.93	0.91	0.95	0.94	0.92	0.94	0.92	0.75	0	0	0	0.78	0	0.71	0.7	0	0
23	Docosatetraenoic acid C22H36O2---cis-4,10,13,16-Docosatetraenoic acid [M-H]- C22H36O2 NIST 1133742	MS1	M-H	331.264	153.37	2269.84	631.92	2107.79	3596.59	3100.03						153.8	153.8	152.6	153.8	152.6						0.95	0.95	0.98	0.95	0.99						0.53	0.6	0.95	0.64	0.94
23	Docosatetraenoic acid C22H36O2---cis-4,10,13,16-Docosatetraenoic acid [M-H]- C22H36O2 NIST 1133742	MS2	M-H	331.265	153.37	7.05	2.24	6.36	4.78	9.41						153.8	153.8	152.6	153.8	152.6						0.95	0.95	0.98	0.95	0.99						0.97	0.78	1	0.89	0.94
23	Docosatetraenoic acid C22H36O2---cis-4,10,13,16-Docosatetraenoic acid [M-H]- C22H36O2 NIST 1133742	MS2	M-H	59.0135	153.37	0.35	0.09	0.99	0.48	1.24						153.8	153.8	152.6	153.8	152.6						0.95	0.95	0.98	0.95	0.99						0.53	0.6	0.95	0.64	0.84
23	Docosatetraenoic acid C22H36O2---cis-4,10,13,16-Docosatetraenoic acid [M-H]- C22H36O2 NIST 1133742	MS2	M-H	71.014	153.37	0	0	0.19	0	0.43						153.8	153.8	152.6	153.8	152.6						0.95	0.95	0.98	0.95	0.99						0	0	0.85	0	0.98
23	Docosatetraenoic acid C22H36O2---cis-4,10,13,16-Docosatetraenoic acid [M-H]- C22H36O2 NIST 1133742	MS2	M-H	81.0331	153.37	0	0	0	0	0						153.8	153.8	152.6	153.8	152.6						0.95	0.95	0.98	0.95	0.99						0	0	0	0	0
24	15-Ketoiloprost [M-H-H2O]- C22H30O4 NIST 1206812	MS1	M-H2O-H	339.199	96.77	2095.3	1740.27	1123.56	2072.69	1166.78	2903.11	2394.86	2565	1283.68	2749.45	96.5	96.5	96.5	96.5	96.5	96.5	96.5	96.5	96.5	96.5	0.97	0.95	0.94	0.95	0.95	0.97	0.96	0.93	0.95	0.95	0.93	0.96	0.93	0.97	0.94	0.9	0.98	0.94	0.97	0.99
24	15-Ketoiloprost [M-H-H2O]- C22H30O4 NIST 1206812	MS2	M-H2O-H	183.012	96.77	212.78	141.35	97.44	209.14	123.77	380.67	265.45	261.7	119.09	279.66	96.5	96.5	96.5	96.5	96.5	96.5	96.5	96.5	96.5	96.5	0.97	0.95	0.94	0.95	0.95	0.97	0.96	0.93	0.95	0.95	0.96	0.96	0.97	0.99	0.96	0.9	0.98	0.99	0.97	0.99
24	15-Ketoiloprost [M-H-H2O]- C22H30O4 NIST 1206812	MS2	M-H2O-H	339.199	96.77	124.65	88.22	59.87	132.83	75.81	222.19	173.85	195.45	73.52	162.69	96.5	96.5	96.5	96.5	96.5	96.5	96.5	96.5	96.5	96.5	0.97	0.95	0.94	0.95	0.95	0.97	0.96	0.93	0.95	0.95	0.93	0.97	0.93	0.97	0.94	0.97	0.98	0.94	0.97	0.99
24	15-Ketoiloprost [M-H-H2O]- C22H30O4 NIST 1206812	MS2	M-H2O-H	119.05	96.77	6.29	6.83	3.3	8.31	4.78	13.54	9.74	11.15	6.6	11.33	96.5	96.5	96.5	96.5	96.5	96.5	96.5	96.5	96.5	96.5	0.97	0.95	0.94	0.95	0.95	0.97	0.96	0.93	0.95	0.95	0.9	0.9	0.84	0.9	0.77	0.9	0.89	0.92	0.91	0.89
24	15-Ketoiloprost [M-H-H2O]- C22H30O4 NIST 1206812	MS2	M-H2O-H	170.005	96.77	4.31	2.05	0.74	5.04	2.57	7.42	3.95	5.69	1.91	6.81	96.5	96.5	96.5	96.5	96.5	96.5	96.5	96.5	96.5	96.5	0.97	0.95	0.94	0.95	0.95	0.97	0.96	0.93	0.95	0.95	0.86	0.63	0.38	0.85	0.69	0.9	0.76	0.91	0.68	0.88
24	15-Ketoiloprost [M-H-H2O]- C22H30O4 NIST 1206812	MS2	M-H2O-H	197.03	96.77	6.36	5.58	2.46	5.04	6.72	6.55	6.37	11.13	3.83	11.43	96.5	96.5	96.5	96.5	96.5	96.5	96.5	96.5	96.5	96.5	0.97	0.95	0.94	0.95	0.95	0.97	0.96	0.93	0.95	0.95	0.71	0.67	0.4	0.68	0.56	0.7	0.57	0.81	0.33	0.69
24	15-Ketoiloprost [M-H-H2O]- C22H30O4 NIST 1206812	MS2	M-H2O-H	184.019	96.77	25.57	23.01	13.17	24.32	16.79	49.01	29.62	38.2	13.71	34.16	96.5	96.5	96.5	96.5	96.5	96.5	96.5	96.5	96.5	96.5	0.97	0.95	0.94	0.95	0.95	0.97	0.96	0.93	0.95	0.95	0.9	0.95	0.87	0.93	0.79	0.87	0.95	0.94	0.95	0.94
25	2,2'-Methylene-bis(6-tert-butyl-4 methylphenol) [M-H]- C23H32O2 NIST 1202717---2,2'-Methylene-bis(6-tert-butyl-4 methylphenol) [M-H]- C23H32O2 NIST 1202718	MS1	M-H	339.232	140.56	297.14	264.9	255.17	294.96	261.38	251.59	267.48	270.79	229.31	207.68	140.6	139.2	140.4	139.2	140.4	144.1	147.7	141.6	142.9	140.4	0.94	0.95	0.94	0.92	0.97	0.94	0.91	0.93	0.97	0.95	0.63	0.66	0.64	0.62	0.56	0.8	0.61	0.61	0.68	0.71
25	2,2'-Methylene-bis(6-tert-butyl-4 methylphenol) [M-H]- C23H32O2 NIST 1202717---2,2'-Methylene-bis(6-tert-butyl-4 methylphenol) [M-H]- C23H32O2 NIST 1202718	MS2	M-H	183.012	140.56	98.35	88.26	114.85	101.44	175.79	78.61	101.58	68.1	66.94	49.34	140.6	139.2	140.4	139.2	140.4	144.1	147.7	141.6	142.9	140.4	0.94	0.95	0.94	0.92	0.97	0.94	0.91	0.93	0.97	0.95	0.62	0.66	0.64	0.57	0.53	0.8	0.61	0.61	0.68	0.71
25	2,2'-Methylene-bis(6-tert-butyl-4 methylphenol) [M-H]- C23H32O2 NIST 1202717---2,2'-Methylene-bis(6-tert-butyl-4 methylphenol) [M-H]- C23H32O2 NIST 1202718	MS2	M-H	163.112	140.56	46.61	39.06	39.53	41.01	64.54	27.15	30.98	31.72	23.36	24.23	140.6	139.2	140.4	139.2	140.4	144.1	147.7	141.6	142.9	140.4	0.94	0.95	0.94	0.92	0.97	0.94	0.91	0.93	0.97	0.95	0.82	0.84	0.81	0.91	0.73	0.9	0.82	0.87	0.84	0.88
25	2,2'-Methylene-bis(6-tert-butyl-4 methylphenol) [M-H]- C23H32O2 NIST 1202717---2,2'-Methylene-bis(6-tert-butyl-4 methylphenol) [M-H]- C23H32O2 NIST 1202718	MS2	M-H	339.198	140.56	63.21	67.81	75.05	73.92	139.32	46.42	85.51	43.47	47.25	40.86	140.6	139.2	140.4	139.2	140.4	144.1	147.7	141.6	142.9	140.4	0.94	0.95	0.94	0.92	0.97	0.94	0.91	0.93	0.97	0.95	0.63	0.58	0.58	0.62	0.5	0.73	0.48	0.59	0.53	0.68
25	2,2'-Methylene-bis(6-tert-butyl-4 methylphenol) [M-H]- C23H32O2 NIST 1202717---2,2'-Methylene-bis(6-tert-butyl-4 methylphenol) [M-H]- C23H32O2 NIST 1202718	MS2	M-H	119.049	140.56	3.61	4.98	0	0	6.88	0	0	0	0.86	1.11	140.6	139.2	140.4	139.2	140.4	144.1	147.7	141.6	142.9	140.4	0.94	0.95	0.94	0.92	0.97	0.94	0.91	0.93	0.97	0.95	0.43	0.52	0	0	0.56	0	0	0	0.18	0.37
25	2,2'-Methylene-bis(6-tert-butyl-4 methylphenol) [M-H]- C23H32O2 NIST 1202717---2,2'-Methylene-bis(6-tert-butyl-4 methylphenol) [M-H]- C23H32O2 NIST 1202718	MS2	M-H	170.004	140.56	0	0	0	0	0	0	0	0.88	0	0	140.6	139.2	140.4	139.2	140.4	144.1	147.7	141.6	142.9	140.4	0.94	0.95	0.94	0.92	0.97	0.94	0.91	0.93	0.97	0.95	0	0	0	0	0	0	0	0.24	0	0
25	2,2'-Methylene-bis(6-tert-butyl-4 methylphenol) [M-H]- C23H32O2 NIST 1202717---2,2'-Methylene-bis(6-tert-butyl-4 methylphenol) [M-H]- C23H32O2 NIST 1202718	MS2	M-H	339.237	140.56	3.49	0	0	5.44	5.62	0	0	0	0	0	140.6	139.2	140.4	139.2	140.4	144.1	147.7	141.6	142.9	140.4	0.94	0.95	0.94	0.92	0.97	0.94	0.91	0.93	0.97	0.95	0.63	0	0	0.6	0.54	0	0	0	0	0
26	Trehalose C12H22O11	MS1	M-H	341.108	582.63			44.88										583.4										1										0.71
26	Trehalose C12H22O11	MS2	M-H	59.0141	582.63			0.35										583.4										1										0.71
27	FAHFA 20:0; FAHFA 18:0/2:0; [M-H]- C20H38O4	MS1	M-H	341.269	130.62	63.8		307.1		211.41						129.4		129.4		129.4						0.82		0.82		0.84						0.8		0.8		0.76
27	FAHFA 20:0; FAHFA 18:0/2:0; [M-H]- C20H38O4	MS2	M-H	283.265	130.62	2.16		5.85		5.65						129.4		129.4		129.4						0.82		0.82		0.84						0.97		0.8		0.87
27	FAHFA 20:0; FAHFA 18:0/2:0; [M-H]- C20H38O4	MS2	M-H	75.0075	130.62	0.39		1.94		3.01						129.4		129.4		129.4						0.82		0.82		0.84						0.8		0.82		0.76
27	FAHFA 20:0; FAHFA 18:0/2:0; [M-H]- C20H38O4	MS2	M-H	199.016	130.62	0		0		0						129.4		129.4		129.4						0.82		0.82		0.84						0		0		0
27	FAHFA 20:0; FAHFA 18:0/2:0; [M-H]- C20H38O4	MS2	M-H	341.177	130.62	0		0		0						129.4		129.4		129.4						0.82		0.82		0.84						0		0		0
27	FAHFA 20:0; FAHFA 18:0/2:0; [M-H]- C20H38O4	MS2	M-H	74.7816	130.62	0		0		0						129.4		129.4		129.4						0.82		0.82		0.84						0		0		0
28	15(R),19(R)-Hydroxyprostaglandin E2 [M-H-H2O]- C20H32O6 NIST 1142205	MS1	M-H	367.211	20.98					345.52										22										0.93										0.62
28	15(R),19(R)-Hydroxyprostaglandin E2 [M-H-H2O]- C20H32O6 NIST 1142205	MS2	M-H	109.069	20.98					2.41										22										0.93										0.79
28	15(R),19(R)-Hydroxyprostaglandin E2 [M-H-H2O]- C20H32O6 NIST 1142205	MS2	M-H	107.047	20.98					1.97										22										0.93										0.62
28	15(R),19(R)-Hydroxyprostaglandin E2 [M-H-H2O]- C20H32O6 NIST 1142205	MS2	M-H	125.096	20.98					0.38										22										0.93										0.41
28	15(R),19(R)-Hydroxyprostaglandin E2 [M-H-H2O]- C20H32O6 NIST 1142205	MS2	M-H	57.0382	20.98					1.45										22										0.93										0.48
28	15(R),19(R)-Hydroxyprostaglandin E2 [M-H-H2O]- C20H32O6 NIST 1142205	MS2	M-H	161.06	20.98					0										22										0.93										0
28	15(R),19(R)-Hydroxyprostaglandin E2 [M-H-H2O]- C20H32O6 NIST 1142205	MS2	M-H	147.045	20.98					0.68										22										0.93										0.62
29	Maltose C12H22O11---SUCROSE C12H22O11	MS1	M+HCOO	387.113	582.64		130.21	124.18	115.27	112.81	117.39	110.35	122.55	121.3	114.71		583.4	583.4	583.4	583.4	583.4	582.2	583.4	583.4	583.4		0.86	0.85	0.85	0.88	0.92	0.9	0.67	0.86	0.85		0.79	0.68	0.71	0.75	0.69	0.71	0.74	0.51	0.67
29	Maltose C12H22O11---SUCROSE C12H22O11	MS2	M+HCOO	59.0146	582.64		0.6	0.52	2.29	0.52	0.52	0.47	0	0.86	0.43		583.4	583.4	583.4	583.4	583.4	582.2	583.4	583.4	583.4		0.86	0.85	0.85	0.88	0.92	0.9	0.67	0.86	0.85		0.66	0.67	0.76	0.75	0.53	0.56	0	0.92	0.67
29	Maltose C12H22O11---SUCROSE C12H22O11	MS2	M+HCOO	89.0248	582.64		0.9	0.85	0.16	0.21	1.33	0.21	0.48	0.11	0.21		583.4	583.4	583.4	583.4	583.4	582.2	583.4	583.4	583.4		0.86	0.85	0.85	0.88	0.92	0.9	0.67	0.86	0.85		0.92	0.69	0.71	0.77	0.5	0.71	0.51	0.51	0.85
29	Maltose C12H22O11---SUCROSE C12H22O11	MS2	M+HCOO	119.034	582.64		0	0.74	0	0.74	0.25	0.25	0.25	0	0		583.4	583.4	583.4	583.4	583.4	582.2	583.4	583.4	583.4		0.86	0.85	0.85	0.88	0.92	0.9	0.67	0.86	0.85		0	0.4	0	0.64	0.69	0.71	0.44	0	0
29	Maltose C12H22O11---SUCROSE C12H22O11	MS2	M+HCOO	113.028	582.64		0	0.18	0	0	0	0	0	0.12	0		583.4	583.4	583.4	583.4	583.4	582.2	583.4	583.4	583.4		0.86	0.85	0.85	0.88	0.92	0.9	0.67	0.86	0.85		0	0.68	0	0	0	0	0	0.51	0
29	Maltose C12H22O11---SUCROSE C12H22O11	MS2	M+HCOO	101.023	582.64		0	0.34	0.23	0	0.11	0	0.23	0	0		583.4	583.4	583.4	583.4	583.4	582.2	583.4	583.4	583.4		0.86	0.85	0.85	0.88	0.92	0.9	0.67	0.86	0.85		0	0.68	0.71	0	0.69	0	0.74	0	0
29	Maltose C12H22O11---SUCROSE C12H22O11	MS2	M+HCOO	71.0162	582.64		0.38	0	0	0	0	0	0.14	0	0		583.4	583.4	583.4	583.4	583.4	582.2	583.4	583.4	583.4		0.86	0.85	0.85	0.88	0.92	0.9	0.67	0.86	0.85		0.79	0	0	0	0	0	0.74	0	0
30	PG 38:5; PG 16:0-22:5; [M-H]- C44H77O10P	MS1	M-2H	397.258	135.78		109.4	303.12									136.8	134.3									0.94	0.86									0.59	0.55
30	PG 38:5; PG 16:0-22:5; [M-H]- C44H77O10P	MS2	M-2H	255.231	135.78		41.16	71.54									136.8	134.3									0.94	0.86									0.26	0.43
30	PG 38:5; PG 16:0-22:5; [M-H]- C44H77O10P	MS2	M-2H	163.113	135.78		0.29	1.15									136.8	134.3									0.94	0.86									0.51	0.13
30	PG 38:5; PG 16:0-22:5; [M-H]- C44H77O10P	MS2	M-2H	283.262	135.78		3.89	5.37									136.8	134.3									0.94	0.86									0.67	0.55
30	PG 38:5; PG 16:0-22:5; [M-H]- C44H77O10P	MS2	M-2H	337.213	135.78		1.03	0.62									136.8	134.3									0.94	0.86									0	0.56
30	PG 38:5; PG 16:0-22:5; [M-H]- C44H77O10P	MS2	M-2H	397.23	135.78		0	0									136.8	134.3									0.94	0.86									0	0
30	PG 38:5; PG 16:0-22:5; [M-H]- C44H77O10P	MS2	M-2H	329.25	135.78		0.41	0									136.8	134.3									0.94	0.86									0.59	0
31	lysoPE 16:1; [M-H]-; PE(16:1(7Z)/0:0) C21H42NO7P---lysoPE 16:1; [M-H]-; PE(16:1(9Z)/0:0) C21H42NO7P	MS1	M-H	450.261	86.26	80.85	86.39	69.43		157.21						85.5	85.5	85.5		85.5						0.97	0.95	0.96		0.99						0.62	0.77	0.71		0.71
31	lysoPE 16:1; [M-H]-; PE(16:1(7Z)/0:0) C21H42NO7P---lysoPE 16:1; [M-H]-; PE(16:1(9Z)/0:0) C21H42NO7P	MS2	M-H	253.217	86.26	9.69	6.52	6.68		16.28						85.5	85.5	85.5		85.5						0.97	0.95	0.96		0.99						0.95	0.95	0.96		0.9
31	lysoPE 16:1; [M-H]-; PE(16:1(7Z)/0:0) C21H42NO7P---lysoPE 16:1; [M-H]-; PE(16:1(9Z)/0:0) C21H42NO7P	MS2	M-H	196.04	86.26	0.63	0	0.47		0.47						85.5	85.5	85.5		85.5						0.97	0.95	0.96		0.99						0.62	0	0.51		0.66
31	lysoPE 16:1; [M-H]-; PE(16:1(7Z)/0:0) C21H42NO7P---lysoPE 16:1; [M-H]-; PE(16:1(9Z)/0:0) C21H42NO7P	MS2	M-H	78.9597	86.26	0.4	0.3	0.4		0.4						85.5	85.5	85.5		85.5						0.97	0.95	0.96		0.99						0.53	0.77	0.71		0.71
31	lysoPE 16:1; [M-H]-; PE(16:1(7Z)/0:0) C21H42NO7P---lysoPE 16:1; [M-H]-; PE(16:1(9Z)/0:0) C21H42NO7P	MS2	M-H	140.012	86.26	0	0	0.27		0						85.5	85.5	85.5		85.5						0.97	0.95	0.96		0.99						0	0	0.71		0
32	1-Palmitoyl-2-hydroxy-sn-glycero-3-phosphoethanolamine [M-H]- C21H44NO7P NIST 1151422---1-Palmitoyl-2-hydroxy-sn-glycero-3-phosphoethanolamine [M-H]- C21H44NO7P NIST 1151423---1-Palmitoyl-2-hydroxy-sn-glycero-3-phosphoethanolamine [M-H]- C21H44NO7P NIST 1151424	MS1	M-H	452.277	109.91	637.3	596.53	555.16	777.37	1258.41	148.54		178.94	294.18	329.17	109.9	109.9	109.9	109.9	109.9	109.9		108.7	109.9	109.9	0.99	0.99	0.99	0.99	0.99	0.92		0.97	0.98	0.99	0.95	0.93	0.97	0.97	0.95	0.7		0.8	0.73	0.7
32	1-Palmitoyl-2-hydroxy-sn-glycero-3-phosphoethanolamine [M-H]- C21H44NO7P NIST 1151422---1-Palmitoyl-2-hydroxy-sn-glycero-3-phosphoethanolamine [M-H]- C21H44NO7P NIST 1151423---1-Palmitoyl-2-hydroxy-sn-glycero-3-phosphoethanolamine [M-H]- C21H44NO7P NIST 1151424	MS2	M-H	255.233	109.91	75.51	67.39	73.84	87.93	149.33	14.13		20.16	32.47	33.9	109.9	109.9	109.9	109.9	109.9	109.9		108.7	109.9	109.9	0.99	0.99	0.99	0.99	0.99	0.92		0.97	0.98	0.99	0.95	0.95	0.97	0.99	0.96	0.99		0.92	0.96	0.93
32	1-Palmitoyl-2-hydroxy-sn-glycero-3-phosphoethanolamine [M-H]- C21H44NO7P NIST 1151422---1-Palmitoyl-2-hydroxy-sn-glycero-3-phosphoethanolamine [M-H]- C21H44NO7P NIST 1151423---1-Palmitoyl-2-hydroxy-sn-glycero-3-phosphoethanolamine [M-H]- C21H44NO7P NIST 1151424	MS2	M-H	196.038	109.91	3.53	2.74	2.66	3.92	6.65	0		0.71	0.32	1.41	109.9	109.9	109.9	109.9	109.9	109.9		108.7	109.9	109.9	0.99	0.99	0.99	0.99	0.99	0.92		0.97	0.98	0.99	0.98	0.93	0.92	0.97	0.84	0		0.8	0.59	0.69
32	1-Palmitoyl-2-hydroxy-sn-glycero-3-phosphoethanolamine [M-H]- C21H44NO7P NIST 1151422---1-Palmitoyl-2-hydroxy-sn-glycero-3-phosphoethanolamine [M-H]- C21H44NO7P NIST 1151423---1-Palmitoyl-2-hydroxy-sn-glycero-3-phosphoethanolamine [M-H]- C21H44NO7P NIST 1151424	MS2	M-H	140.012	109.91	1.85	1.79	2.45	1.92	2.99	0.27		0.4	0.67	0.79	109.9	109.9	109.9	109.9	109.9	109.9		108.7	109.9	109.9	0.99	0.99	0.99	0.99	0.99	0.92		0.97	0.98	0.99	0.8	0.87	0.97	0.74	0.86	0.63		0.64	0.66	0.69
32	1-Palmitoyl-2-hydroxy-sn-glycero-3-phosphoethanolamine [M-H]- C21H44NO7P NIST 1151422---1-Palmitoyl-2-hydroxy-sn-glycero-3-phosphoethanolamine [M-H]- C21H44NO7P NIST 1151423---1-Palmitoyl-2-hydroxy-sn-glycero-3-phosphoethanolamine [M-H]- C21H44NO7P NIST 1151424	MS2	M-H	78.9588	109.91	0.89	1.05	2.09	1.39	3.39	0		0	0.5	0.7	109.9	109.9	109.9	109.9	109.9	109.9		108.7	109.9	109.9	0.99	0.99	0.99	0.99	0.99	0.92		0.97	0.98	0.99	0.88	0.93	0.86	0.94	0.93	0		0	0.73	0.45
32	1-Palmitoyl-2-hydroxy-sn-glycero-3-phosphoethanolamine [M-H]- C21H44NO7P NIST 1151422---1-Palmitoyl-2-hydroxy-sn-glycero-3-phosphoethanolamine [M-H]- C21H44NO7P NIST 1151423---1-Palmitoyl-2-hydroxy-sn-glycero-3-phosphoethanolamine [M-H]- C21H44NO7P NIST 1151424	MS2	M-H	152.997	109.91	0.7	1.22	0.7	0.91	0.69	0		0	0	0.98	109.9	109.9	109.9	109.9	109.9	109.9		108.7	109.9	109.9	0.99	0.99	0.99	0.99	0.99	0.92		0.97	0.98	0.99	0.79	0.24	0.33	0.72	0.64	0		0	0	0.7
32	1-Palmitoyl-2-hydroxy-sn-glycero-3-phosphoethanolamine [M-H]- C21H44NO7P NIST 1151422---1-Palmitoyl-2-hydroxy-sn-glycero-3-phosphoethanolamine [M-H]- C21H44NO7P NIST 1151423---1-Palmitoyl-2-hydroxy-sn-glycero-3-phosphoethanolamine [M-H]- C21H44NO7P NIST 1151424	MS2	M-H	452.279	109.91	2.86	1.79	2.63	0	7.01	0.72		0	0.72	0	109.9	109.9	109.9	109.9	109.9	109.9		108.7	109.9	109.9	0.99	0.99	0.99	0.99	0.99	0.92		0.97	0.98	0.99	0.72	0.93	0.62	0	0.95	0.7		0	0.73	0
33	Cholesterol 3-sulfate [M-H]- C27H46O4S NIST 1062158---Cholesterol 3-sulfate [M-H]- C27H46O4S NIST 1062162	MS1	M-H	465.303	152.23	198.54	111.95	168.81	168.34	168.73	133.78	126.84	67.05	152.92	106.87	151.4	152.6	151.4	151.4	152.6	151.4	151.4	151.4	151.4	151.4	0.96	0.89	0.81	0.93	0.85	0.96	0.92	0.95	0.92	0.95	0.99	0.97	0.88	0.96	0.92	0.94	0.88	0.95	0.9	0.93
33	Cholesterol 3-sulfate [M-H]- C27H46O4S NIST 1062158---Cholesterol 3-sulfate [M-H]- C27H46O4S NIST 1062162	MS2	M-H	465.306	152.23	19.28	10.38	19.04	23.47	21.26	13.51	11.95	11.27	15.48	10.6	151.4	152.6	151.4	151.4	152.6	151.4	151.4	151.4	151.4	151.4	0.96	0.89	0.81	0.93	0.85	0.96	0.92	0.95	0.92	0.95	0.99	0.98	0.94	0.96	0.95	0.94	0.96	0.95	0.9	0.93
33	Cholesterol 3-sulfate [M-H]- C27H46O4S NIST 1062158---Cholesterol 3-sulfate [M-H]- C27H46O4S NIST 1062162	MS2	M-H	96.9595	152.23	13.19	5.03	9.04	10.51	10.75	9.92	6.37	5.13	7.61	5.75	151.4	152.6	151.4	151.4	152.6	151.4	151.4	151.4	151.4	151.4	0.96	0.89	0.81	0.93	0.85	0.96	0.92	0.95	0.92	0.95	0.99	0.97	0.88	0.98	0.92	0.94	0.88	0.95	0.9	0.97
33	Cholesterol 3-sulfate [M-H]- C27H46O4S NIST 1062158---Cholesterol 3-sulfate [M-H]- C27H46O4S NIST 1062162	MS2	M-H	79.9583	152.23	0	0	0	0	0	0	0	0	0	0	151.4	152.6	151.4	151.4	152.6	151.4	151.4	151.4	151.4	151.4	0.96	0.89	0.81	0.93	0.85	0.96	0.92	0.95	0.92	0.95	0	0	0	0	0	0	0	0	0	0
33	Cholesterol 3-sulfate [M-H]- C27H46O4S NIST 1062158---Cholesterol 3-sulfate [M-H]- C27H46O4S NIST 1062162	MS2	M-H	255.231	152.23	8.67	9.57	32.47	10.09	21.15	3.09	6.87	3.37	10	6.61	151.4	152.6	151.4	151.4	152.6	151.4	151.4	151.4	151.4	151.4	0.96	0.89	0.81	0.93	0.85	0.96	0.92	0.95	0.92	0.95	0.66	0.87	0.86	0.79	0.85	0.66	0.66	0.63	0.64	0.63
33	Cholesterol 3-sulfate [M-H]- C27H46O4S NIST 1062158---Cholesterol 3-sulfate [M-H]- C27H46O4S NIST 1062162	MS2	M-H	183.011	152.23	0.15	0	0	0	0.61	0	0	0.31	0	0	151.4	152.6	151.4	151.4	152.6	151.4	151.4	151.4	151.4	151.4	0.96	0.89	0.81	0.93	0.85	0.96	0.92	0.95	0.92	0.95	0.54	0	0	0	0.27	0	0	0.46	0	0
34	lysoPE 18:2; [M-H]-; PE(18:2(2E,4E)/0:0) C23H44NO7P---lysoPE 18:2; [M-H]-; PE(18:2(6Z,9Z)/0:0) C23H44NO7P---lysoPE 18:2; [M-H]-; PE(18:2(9E,10E)/0:0) C23H44NO7P---lysoPE 18:2; [M-H]-; PE(18:2(9E,12E)/0:0) C23H44NO7P---lysoPE 18:2; [M-H]-; PE(18:2(9Z,11Z)/0:0) C23H44NO7P---lysoPE 18:2; [M-H]-; PE(18:2(9Z,12Z)/0:0) C23H44NO7P	MS1	M-H	476.277	92.05		1391.12	413.06		1585.22							91.6	91.6		91.6							1	1		1							0.91	0.69		0.89
34	lysoPE 18:2; [M-H]-; PE(18:2(2E,4E)/0:0) C23H44NO7P---lysoPE 18:2; [M-H]-; PE(18:2(6Z,9Z)/0:0) C23H44NO7P---lysoPE 18:2; [M-H]-; PE(18:2(9E,10E)/0:0) C23H44NO7P---lysoPE 18:2; [M-H]-; PE(18:2(9E,12E)/0:0) C23H44NO7P---lysoPE 18:2; [M-H]-; PE(18:2(9Z,11Z)/0:0) C23H44NO7P---lysoPE 18:2; [M-H]-; PE(18:2(9Z,12Z)/0:0) C23H44NO7P	MS2	M-H	279.234	92.05		194.49	50.08		218.05							91.6	91.6		91.6							1	1		1							0.96	0.94		0.96
34	lysoPE 18:2; [M-H]-; PE(18:2(2E,4E)/0:0) C23H44NO7P---lysoPE 18:2; [M-H]-; PE(18:2(6Z,9Z)/0:0) C23H44NO7P---lysoPE 18:2; [M-H]-; PE(18:2(9E,10E)/0:0) C23H44NO7P---lysoPE 18:2; [M-H]-; PE(18:2(9E,12E)/0:0) C23H44NO7P---lysoPE 18:2; [M-H]-; PE(18:2(9Z,11Z)/0:0) C23H44NO7P---lysoPE 18:2; [M-H]-; PE(18:2(9Z,12Z)/0:0) C23H44NO7P	MS2	M-H	214.047	92.05		3.85	0.5		4.5							91.6	91.6		91.6							1	1		1							0.91	0.69		0.89
35	1-(9Z-Octadecenoyl)-sn-glycero-3-phosphoethanolamine [M-H]- C23H46NO7P NIST 1149948---1-(9Z-Octadecenoyl)-sn-glycero-3-phosphoethanolamine [M-H]- C23H46NO7P NIST 1149949---1-(9Z-Octadecenoyl)-sn-glycero-3-phosphoethanolamine [M-H]- C23H46NO7P NIST 1149951---1-(9Z-Octadecenoyl)-sn-glycero-3-phosphoethanolamine [M-H]- C23H46NO7P NIST 1149952	MS1	M-H	478.293	116.22	977.33	740.79	632.19	842.64	1379.58	81.63			188.98	178.51	116	116	116	116	116	116			116	116	1	1	1	1	1	0.96			0.97	0.99	0.93	0.87	0.92	0.94	0.93	0.92			0.71	0.8
35	1-(9Z-Octadecenoyl)-sn-glycero-3-phosphoethanolamine [M-H]- C23H46NO7P NIST 1149948---1-(9Z-Octadecenoyl)-sn-glycero-3-phosphoethanolamine [M-H]- C23H46NO7P NIST 1149949---1-(9Z-Octadecenoyl)-sn-glycero-3-phosphoethanolamine [M-H]- C23H46NO7P NIST 1149951---1-(9Z-Octadecenoyl)-sn-glycero-3-phosphoethanolamine [M-H]- C23H46NO7P NIST 1149952	MS2	M-H	281.248	116.22	122.68	97.6	67.22	98.54	194.48	12.17			22.27	16.4	116	116	116	116	116	116			116	116	1	1	1	1	1	0.96			0.97	0.99	0.96	0.89	0.94	0.98	0.92	0.94			0.94	0.99
35	1-(9Z-Octadecenoyl)-sn-glycero-3-phosphoethanolamine [M-H]- C23H46NO7P NIST 1149948---1-(9Z-Octadecenoyl)-sn-glycero-3-phosphoethanolamine [M-H]- C23H46NO7P NIST 1149949---1-(9Z-Octadecenoyl)-sn-glycero-3-phosphoethanolamine [M-H]- C23H46NO7P NIST 1149951---1-(9Z-Octadecenoyl)-sn-glycero-3-phosphoethanolamine [M-H]- C23H46NO7P NIST 1149952	MS2	M-H	196.038	116.22	5.64	6.58	5.18	4.7	8.75	2.04			0.63	1.42	116	116	116	116	116	116			116	116	1	1	1	1	1	0.96			0.97	0.99	0.91	0.75	0.87	0.84	0.85	0.92			0.71	0.71
35	1-(9Z-Octadecenoyl)-sn-glycero-3-phosphoethanolamine [M-H]- C23H46NO7P NIST 1149948---1-(9Z-Octadecenoyl)-sn-glycero-3-phosphoethanolamine [M-H]- C23H46NO7P NIST 1149949---1-(9Z-Octadecenoyl)-sn-glycero-3-phosphoethanolamine [M-H]- C23H46NO7P NIST 1149951---1-(9Z-Octadecenoyl)-sn-glycero-3-phosphoethanolamine [M-H]- C23H46NO7P NIST 1149952	MS2	M-H	140.011	116.22	3.64	2.84	2.59	2.86	3.91	0.13			0.27	0.27	116	116	116	116	116	116			116	116	1	1	1	1	1	0.96			0.97	0.99	0.93	0.87	0.87	0.82	0.88	0.84			0.71	0.8
35	1-(9Z-Octadecenoyl)-sn-glycero-3-phosphoethanolamine [M-H]- C23H46NO7P NIST 1149948---1-(9Z-Octadecenoyl)-sn-glycero-3-phosphoethanolamine [M-H]- C23H46NO7P NIST 1149949---1-(9Z-Octadecenoyl)-sn-glycero-3-phosphoethanolamine [M-H]- C23H46NO7P NIST 1149951---1-(9Z-Octadecenoyl)-sn-glycero-3-phosphoethanolamine [M-H]- C23H46NO7P NIST 1149952	MS2	M-H	78.9588	116.22	1.15	2.54	1.64	1.39	3.08	0			0	0.3	116	116	116	116	116	116			116	116	1	1	1	1	1	0.96			0.97	0.99	0.69	0.82	0.92	0.92	0.95	0			0	0.45
35	1-(9Z-Octadecenoyl)-sn-glycero-3-phosphoethanolamine [M-H]- C23H46NO7P NIST 1149948---1-(9Z-Octadecenoyl)-sn-glycero-3-phosphoethanolamine [M-H]- C23H46NO7P NIST 1149949---1-(9Z-Octadecenoyl)-sn-glycero-3-phosphoethanolamine [M-H]- C23H46NO7P NIST 1149951---1-(9Z-Octadecenoyl)-sn-glycero-3-phosphoethanolamine [M-H]- C23H46NO7P NIST 1149952	MS2	M-H	214.05	116.22	0.82	1.16	0.83	0.74	1.9	0			0	0	116	116	116	116	116	116			116	116	1	1	1	1	1	0.96			0.97	0.99	0.75	0.82	0.37	0.78	0.93	0			0	0
35	1-(9Z-Octadecenoyl)-sn-glycero-3-phosphoethanolamine [M-H]- C23H46NO7P NIST 1149948---1-(9Z-Octadecenoyl)-sn-glycero-3-phosphoethanolamine [M-H]- C23H46NO7P NIST 1149949---1-(9Z-Octadecenoyl)-sn-glycero-3-phosphoethanolamine [M-H]- C23H46NO7P NIST 1149951---1-(9Z-Octadecenoyl)-sn-glycero-3-phosphoethanolamine [M-H]- C23H46NO7P NIST 1149952	MS2	M-H	152.995	116.22	0.83	0.42	0.84	1.39	1.45	0			0.55	0.14	116	116	116	116	116	116			116	116	1	1	1	1	1	0.96			0.97	0.99	0.82	0.74	0.87	0.94	0.84	0			0.45	0.45
36	1-Stearoyl-2-hydroxy-sn-glycero-3-phosphoethanolamine [M-H]- C23H48NO7P NIST 1151473---1-Stearoyl-2-hydroxy-sn-glycero-3-phosphoethanolamine [M-H]- C23H48NO7P NIST 1151474---1-Stearoyl-2-hydroxy-sn-glycero-3-phosphoethanolamine [M-H]- C23H48NO7P NIST 1151476	MS1	M-H	480.309	137	558.2	437.95	470.36	554.87	685.05	144.04		417.73	293.58	275.43	136.8	138	136.8	136.8	136.8	136.8		136.8	136.8	136.8	0.99	1	0.99	0.99	1	0.97		0.97	0.96	0.99	0.85	0.82	0.93	0.9	0.76	0.9		0.96	0.88	0.92
36	1-Stearoyl-2-hydroxy-sn-glycero-3-phosphoethanolamine [M-H]- C23H48NO7P NIST 1151473---1-Stearoyl-2-hydroxy-sn-glycero-3-phosphoethanolamine [M-H]- C23H48NO7P NIST 1151474---1-Stearoyl-2-hydroxy-sn-glycero-3-phosphoethanolamine [M-H]- C23H48NO7P NIST 1151476	MS2	M-H	283.264	137	132.27	86.6	107.65	123.24	161.28	15.8		51.93	32.62	37.86	136.8	138	136.8	136.8	136.8	136.8		136.8	136.8	136.8	0.99	1	0.99	0.99	1	0.97		0.97	0.96	0.99	0.86	0.79	0.92	0.89	0.61	0.95		0.87	0.96	0.92
36	1-Stearoyl-2-hydroxy-sn-glycero-3-phosphoethanolamine [M-H]- C23H48NO7P NIST 1151473---1-Stearoyl-2-hydroxy-sn-glycero-3-phosphoethanolamine [M-H]- C23H48NO7P NIST 1151474---1-Stearoyl-2-hydroxy-sn-glycero-3-phosphoethanolamine [M-H]- C23H48NO7P NIST 1151476	MS2	M-H	196.038	137	6.65	3.84	4.46	7.32	10.44	1.18		2.98	0.55	2.19	136.8	138	136.8	136.8	136.8	136.8		136.8	136.8	136.8	0.99	1	0.99	0.99	1	0.97		0.97	0.96	0.99	0.85	0.78	0.93	0.9	0.51	0.9		0.96	0.88	0.81
36	1-Stearoyl-2-hydroxy-sn-glycero-3-phosphoethanolamine [M-H]- C23H48NO7P NIST 1151473---1-Stearoyl-2-hydroxy-sn-glycero-3-phosphoethanolamine [M-H]- C23H48NO7P NIST 1151474---1-Stearoyl-2-hydroxy-sn-glycero-3-phosphoethanolamine [M-H]- C23H48NO7P NIST 1151476	MS2	M-H	140.01	137	1.52	2.32	2.98	1.73	2.81	0.27		0.47	0.66	1.13	136.8	138	136.8	136.8	136.8	136.8		136.8	136.8	136.8	0.99	1	0.99	0.99	1	0.97		0.97	0.96	0.99	0.7	0.73	0.93	0.76	0.55	0.8		0.3	0.57	0.93
36	1-Stearoyl-2-hydroxy-sn-glycero-3-phosphoethanolamine [M-H]- C23H48NO7P NIST 1151473---1-Stearoyl-2-hydroxy-sn-glycero-3-phosphoethanolamine [M-H]- C23H48NO7P NIST 1151474---1-Stearoyl-2-hydroxy-sn-glycero-3-phosphoethanolamine [M-H]- C23H48NO7P NIST 1151476	MS2	M-H	78.9588	137	1.59	0.4	1.94	2.25	1.32	0		0.25	0	0.2	136.8	138	136.8	136.8	136.8	136.8		136.8	136.8	136.8	0.99	1	0.99	0.99	1	0.97		0.97	0.96	0.99	0.7	0.93	0.92	0.69	0.76	0		0.92	0	0.82
36	1-Stearoyl-2-hydroxy-sn-glycero-3-phosphoethanolamine [M-H]- C23H48NO7P NIST 1151473---1-Stearoyl-2-hydroxy-sn-glycero-3-phosphoethanolamine [M-H]- C23H48NO7P NIST 1151474---1-Stearoyl-2-hydroxy-sn-glycero-3-phosphoethanolamine [M-H]- C23H48NO7P NIST 1151476	MS2	M-H	480.31	137	4.43	1.85	4.43	6.74	7.84	0.74		5.04	2.94	2.35	136.8	138	136.8	136.8	136.8	136.8		136.8	136.8	136.8	0.99	1	0.99	0.99	1	0.97		0.97	0.96	0.99	0.7	0.8	0.81	0.9	0.73	0.28		0.96	0.69	0.92
36	1-Stearoyl-2-hydroxy-sn-glycero-3-phosphoethanolamine [M-H]- C23H48NO7P NIST 1151473---1-Stearoyl-2-hydroxy-sn-glycero-3-phosphoethanolamine [M-H]- C23H48NO7P NIST 1151474---1-Stearoyl-2-hydroxy-sn-glycero-3-phosphoethanolamine [M-H]- C23H48NO7P NIST 1151476	MS2	M-H	152.995	137	0.98	0.28	0.42	0.84	1.28	0.42		0	0	0	136.8	138	136.8	136.8	136.8	136.8		136.8	136.8	136.8	0.99	1	0.99	0.99	1	0.97		0.97	0.96	0.99	0.79	0.82	0.65	0.39	0.97	0.8		0	0	0
37	LPE 20:4; [M-H]- C25H44NO7P---lysoPE 20:4; [M-H]-; PE(20:4(5E,8E,11E,14E)/0:0) C25H44NO7P---lysoPE 20:4; [M-H]-; PE(20:4(5Z,8Z,11Z,14Z)/0:0) C25H44NO7P---lysoPE 20:4; [M-H]-; PE(20:4(7E,10E,13E,16E)/0:0) C25H44NO7P	MS1	M-H	500.277	91.13	1063.11	2844.99	1231.9		3231.51						91.6	90.4	91.6		91.6						0.84	0.88	0.88		0.88						0.85	0.84	0.76		0.94
37	LPE 20:4; [M-H]- C25H44NO7P---lysoPE 20:4; [M-H]-; PE(20:4(5E,8E,11E,14E)/0:0) C25H44NO7P---lysoPE 20:4; [M-H]-; PE(20:4(5Z,8Z,11Z,14Z)/0:0) C25H44NO7P---lysoPE 20:4; [M-H]-; PE(20:4(7E,10E,13E,16E)/0:0) C25H44NO7P	MS2	M-H	303.232	91.13	40.25	166.42	69.52		187.5						91.6	90.4	91.6		91.6						0.84	0.88	0.88		0.88						0.96	0.92	0.95		0.98
37	LPE 20:4; [M-H]- C25H44NO7P---lysoPE 20:4; [M-H]-; PE(20:4(5E,8E,11E,14E)/0:0) C25H44NO7P---lysoPE 20:4; [M-H]-; PE(20:4(5Z,8Z,11Z,14Z)/0:0) C25H44NO7P---lysoPE 20:4; [M-H]-; PE(20:4(7E,10E,13E,16E)/0:0) C25H44NO7P	MS2	M-H	214.052	91.13	2.79	7.39	1.48		9.83						91.6	90.4	91.6		91.6						0.84	0.88	0.88		0.88						0.85	0.84	0.76		0.94
37	LPE 20:4; [M-H]- C25H44NO7P---lysoPE 20:4; [M-H]-; PE(20:4(5E,8E,11E,14E)/0:0) C25H44NO7P---lysoPE 20:4; [M-H]-; PE(20:4(5Z,8Z,11Z,14Z)/0:0) C25H44NO7P---lysoPE 20:4; [M-H]-; PE(20:4(7E,10E,13E,16E)/0:0) C25H44NO7P	MS2	M-H	196.042	91.13	0	5	2.28		7.1						91.6	90.4	91.6		91.6						0.84	0.88	0.88		0.88						0	0.64	0.29		0.73
37	LPE 20:4; [M-H]- C25H44NO7P---lysoPE 20:4; [M-H]-; PE(20:4(5E,8E,11E,14E)/0:0) C25H44NO7P---lysoPE 20:4; [M-H]-; PE(20:4(5Z,8Z,11Z,14Z)/0:0) C25H44NO7P---lysoPE 20:4; [M-H]-; PE(20:4(7E,10E,13E,16E)/0:0) C25H44NO7P	MS2	M-H	78.9577	91.13	1.05	1.4	0.2		2.19						91.6	90.4	91.6		91.6						0.84	0.88	0.88		0.88						0.54	0.73	0.59		0.82
38	Palmitelaidic acid C16H30O2 MoNA 440480---cis-7-Hexadecenoic acid [M-H]- C16H30O2 NIST 1208139	MS1	2M-H	507.441	126.72	133.48		212.36	487.7	268.99						127		125.8	127	125.8						0.99		0.98	0.99	0.99						0.95		0.96	0.94	0.84
38	Palmitelaidic acid C16H30O2 MoNA 440480---cis-7-Hexadecenoic acid [M-H]- C16H30O2 NIST 1208139	MS2	2M-H	253.217	126.72	289.62		397.83	600.59	539.22						127		125.8	127	125.8						0.99		0.98	0.99	0.99						0.98		0.96	0.98	0.99
38	Palmitelaidic acid C16H30O2 MoNA 440480---cis-7-Hexadecenoic acid [M-H]- C16H30O2 NIST 1208139	MS2	2M-H	257.154	126.72	0		0	0	0						127		125.8	127	125.8						0.99		0.98	0.99	0.99						0		0	0	0
38	Palmitelaidic acid C16H30O2 MoNA 440480---cis-7-Hexadecenoic acid [M-H]- C16H30O2 NIST 1208139	MS2	2M-H	235.205	126.72	0.26		0	1.21	0						127		125.8	127	125.8						0.99		0.98	0.99	0.99						0.39		0	0.33	0
38	Palmitelaidic acid C16H30O2 MoNA 440480---cis-7-Hexadecenoic acid [M-H]- C16H30O2 NIST 1208139	MS2	2M-H	223.027	126.72	0		0	0	0						127		125.8	127	125.8						0.99		0.98	0.99	0.99						0		0	0	0
38	Palmitelaidic acid C16H30O2 MoNA 440480---cis-7-Hexadecenoic acid [M-H]- C16H30O2 NIST 1208139	MS2	2M-H	255.228	126.72	8.22		13.92	16.92	16.74						127		125.8	127	125.8						0.99		0.98	0.99	0.99						0.95		0.96	0.94	0.84
39	LPE 20:0; [M-H]- C25H52NO7P	MS1	M-H	508.346	160.18	16.78				46.83						159.9				159.9						0.63				0.83						0.67				0.78
39	LPE 20:0; [M-H]- C25H52NO7P	MS2	M-H	311.293	160.18	0.4				4.26						159.9				159.9						0.63				0.83						0.67				0.85
39	LPE 20:0; [M-H]- C25H52NO7P	MS2	M-H	140.015	160.18	0.13				0						159.9				159.9						0.63				0.83						0.47				0
39	LPE 20:0; [M-H]- C25H52NO7P	MS2	M-H	508.361	160.18	0				0.76						159.9				159.9						0.63				0.83						0				0.78
39	LPE 20:0; [M-H]- C25H52NO7P	MS2	M-H	196.036	160.18	0				0						159.9				159.9						0.63				0.83						0				0
39	LPE 20:0; [M-H]- C25H52NO7P	MS2	M-H	78.9585	160.18	0				0.45						159.9				159.9						0.63				0.83						0				0.53
39	LPE 20:0; [M-H]- C25H52NO7P	MS2	M-H	61.9893	160.18	5.24				8.91						159.9				159.9						0.63				0.83						0.7				0.49
40	FAHFA 32:0; FAHFA 16:0/16:0; [M-H]- C32H62O4	MS1	M-H	509.457	252.02			43.29		40.73								251.5		251.5								0.99		0.99								0.66		0.55
40	FAHFA 32:0; FAHFA 16:0/16:0; [M-H]- C32H62O4	MS2	M-H	255.233	252.02			4.56		4.39								251.5		251.5								0.99		0.99								0.93		0.69
40	FAHFA 32:0; FAHFA 16:0/16:0; [M-H]- C32H62O4	MS2	M-H	271.228	252.02			0.56		0.74								251.5		251.5								0.99		0.99								0.66		0.55
41	Palmitic acid C16H32O2 Bruker-Sumner MetaboBASE Plant Library 373612---Palmitic acid C16H32O2 Bruker-Sumner MetaboBASE Plant Library 373613	MS1	2M-H	511.472	147.81	221.53	466.8	255.44	255.27	320	274.88	229.47	238.03	208.1	202.82	147.7	147.7	147.7	147.7	147.7	147.7	147.7	147.7	147.7	147.7	0.93	0.93	0.94	0.94	0.93	0.94	0.93	0.93	0.94	0.94	0.86	0.88	0.95	0.75	0.95	0.94	0.88	0.95	0.92	0.88
41	Palmitic acid C16H32O2 Bruker-Sumner MetaboBASE Plant Library 373612---Palmitic acid C16H32O2 Bruker-Sumner MetaboBASE Plant Library 373613	MS2	2M-H	255.233	147.81	417.35	608.55	371.4	327.42	530.31	382.62	303.25	347.36	261.08	233.48	147.7	147.7	147.7	147.7	147.7	147.7	147.7	147.7	147.7	147.7	0.93	0.93	0.94	0.94	0.93	0.94	0.93	0.93	0.94	0.94	0.92	0.92	0.95	0.78	0.94	0.94	0.92	0.95	0.94	0.93
41	Palmitic acid C16H32O2 Bruker-Sumner MetaboBASE Plant Library 373612---Palmitic acid C16H32O2 Bruker-Sumner MetaboBASE Plant Library 373613	MS2	2M-H	254.444	147.81	1.78	5.69	3.38	2.13	4.45	2.86	0.53	1.43	0.54	0.81	147.7	147.7	147.7	147.7	147.7	147.7	147.7	147.7	147.7	147.7	0.93	0.93	0.94	0.94	0.93	0.94	0.93	0.93	0.94	0.94	0.64	0.76	0.77	0.31	0.97	0.97	0.88	0.67	0.84	0.67
41	Palmitic acid C16H32O2 Bruker-Sumner MetaboBASE Plant Library 373612---Palmitic acid C16H32O2 Bruker-Sumner MetaboBASE Plant Library 373613	MS2	2M-H	237.222	147.81	0	0	0	0	1.04	0	0	0	0.35	0.17	147.7	147.7	147.7	147.7	147.7	147.7	147.7	147.7	147.7	147.7	0.93	0.93	0.94	0.94	0.93	0.94	0.93	0.93	0.94	0.94	0	0	0	0	0.95	0	0	0	0.84	0.36
41	Palmitic acid C16H32O2 Bruker-Sumner MetaboBASE Plant Library 373612---Palmitic acid C16H32O2 Bruker-Sumner MetaboBASE Plant Library 373613	MS2	2M-H	256.242	147.81	69.25	104.75	63.32	51.23	92.83	63.3	47.13	59.66	38.16	31.69	147.7	147.7	147.7	147.7	147.7	147.7	147.7	147.7	147.7	147.7	0.93	0.93	0.94	0.94	0.93	0.94	0.93	0.93	0.94	0.94	0.86	0.88	0.96	0.75	0.92	0.91	0.8	0.97	0.92	0.88
41	Palmitic acid C16H32O2 Bruker-Sumner MetaboBASE Plant Library 373612---Palmitic acid C16H32O2 Bruker-Sumner MetaboBASE Plant Library 373613	MS2	2M-H	261.54	147.81	0	0	0	0	0	0	0	0	0	0	147.7	147.7	147.7	147.7	147.7	147.7	147.7	147.7	147.7	147.7	0.93	0.93	0.94	0.94	0.93	0.94	0.93	0.93	0.94	0.94	0	0	0	0	0	0	0	0	0	0
41	Palmitic acid C16H32O2 Bruker-Sumner MetaboBASE Plant Library 373612---Palmitic acid C16H32O2 Bruker-Sumner MetaboBASE Plant Library 373613	MS2	2M-H	256.859	147.81	0	0	0	0	0	0	0	0	0	0	147.7	147.7	147.7	147.7	147.7	147.7	147.7	147.7	147.7	147.7	0.93	0.93	0.94	0.94	0.93	0.94	0.93	0.93	0.94	0.94	0	0	0	0	0	0	0	0	0	0
42	LPE 22:6; [M-H]- C27H44NO7P	MS1	M-H	524.277	88.63	581.42	1440.08	549.07		1336.01			238.72			89.2	87.9	89.2		87.9			87.9			0.73	0.91	0.71		0.92			0.96			0.8	0.9	0.69		0.93			0.69
42	LPE 22:6; [M-H]- C27H44NO7P	MS2	M-H	214.05	88.63	0	5.28	0		4.43			0.5			89.2	87.9	89.2		87.9			87.9			0.73	0.91	0.71		0.92			0.96			0	0.9	0		0.92			0.74
42	LPE 22:6; [M-H]- C27H44NO7P	MS2	M-H	327.235	88.63	9.82	33.68	8.17		28.52			4.15			89.2	87.9	89.2		87.9			87.9			0.73	0.91	0.71		0.92			0.96			0.89	0.93	0.94		0.95			0.69
42	LPE 22:6; [M-H]- C27H44NO7P	MS2	M-H	140.009	88.63	1.2	2.32	0.6		1.72			0.27			89.2	87.9	89.2		87.9			87.9			0.73	0.91	0.71		0.92			0.96			0.8	0.87	0.69		0.93			0.38
43	lysoPE 22:4; [M-H]-; PE(22:4(7Z,10Z,13Z,16Z)/0:0) C27H48NO7P	MS1	M-H	528.309	114.19				64.07	77.78			42.75		93.48				113.6	113.6			113.6		113.6				0.96	0.88			0.87		0.88				0.84	0.51			0.69		0.67
43	lysoPE 22:4; [M-H]-; PE(22:4(7Z,10Z,13Z,16Z)/0:0) C27H48NO7P	MS2	M-H	331.263	114.19				5.7	7.74			3.67		7.85				113.6	113.6			113.6		113.6				0.96	0.88			0.87		0.88				0.94	0.86			0.85		0.99
43	lysoPE 22:4; [M-H]-; PE(22:4(7Z,10Z,13Z,16Z)/0:0) C27H48NO7P	MS2	M-H	214.048	114.19				0.17	0			0		0				113.6	113.6			113.6		113.6				0.96	0.88			0.87		0.88				0.84	0			0		0
43	lysoPE 22:4; [M-H]-; PE(22:4(7Z,10Z,13Z,16Z)/0:0) C27H48NO7P	MS2	M-H	61.9893	114.19				1.69	3.18			1.02		0.67				113.6	113.6			113.6		113.6				0.96	0.88			0.87		0.88				0.54	0.51			0.69		0.67
44	FAHFA 34:0; FAHFA 16:0/18:0; [M-H]- C34H66O4	MS1	M-H	537.488	152.69	30.66	34.1	23.91	28.61	39.07		4.68	8.26			152.6	152.6	151.4	152.6	152.6		152.7	152.7			0.84	0.92	0.9	0.86	0.88		0.89	0.96			0.69	0.89	0.89	0.71	0.79		0.61	0.55
44	FAHFA 34:0; FAHFA 16:0/18:0; [M-H]- C34H66O4	MS2	M-H	255.236	152.69	19.52	26.97	11.21	21.73	29.02		17.17	16.48			152.6	152.6	151.4	152.6	152.6		152.7	152.7			0.84	0.92	0.9	0.86	0.88		0.89	0.96			0.73	0.89	0.89	0.71	0.79		0.61	0.55
44	FAHFA 34:0; FAHFA 16:0/18:0; [M-H]- C34H66O4	MS2	M-H	281.25	152.69	39.21	43.48	16.46	44.31	46.66		7.23	8.94			152.6	152.6	151.4	152.6	152.6		152.7	152.7			0.84	0.92	0.9	0.86	0.88		0.89	0.96			0.69	0.92	0.96	0.85	0.84		0.75	0.7
45	LPC 16:1; [M+FA-H]- C24H48NO7P	MS1	M+HCOO	538.314	81.72	173.4	500.47	278.97	202.47	464.47	26.72	26.81	14.03	68.88	43.13	80.6	77	80.6	80.6	79.4	83.1	81.7	81.7	83.1	83.1	0.91	0.99	0.92	0.89	0.95	0.64	0.55	0.56	0.82	0.68	0.79	0.9	0.8	0.8	0.8	0.78	0.63	0.72	0.78	0.79
45	LPC 16:1; [M+FA-H]- C24H48NO7P	MS2	M+HCOO	253.217	81.72	22.96	76.46	33.27	20.65	56.6	3.21	2.87	2.69	7.34	5.39	80.6	77	80.6	80.6	79.4	83.1	81.7	81.7	83.1	83.1	0.91	0.99	0.92	0.89	0.95	0.64	0.55	0.56	0.82	0.68	0.9	0.9	0.94	0.9	0.95	0.95	0.63	0.76	0.78	0.79
45	LPC 16:1; [M+FA-H]- C24H48NO7P	MS2	M+HCOO	478.292	81.72	7.35	13.1	9.68	4.31	14.47	0.49	0.99	0.25	2.57	0.25	80.6	77	80.6	80.6	79.4	83.1	81.7	81.7	83.1	83.1	0.91	0.99	0.92	0.89	0.95	0.64	0.55	0.56	0.82	0.68	0.76	0.91	0.8	0.8	0.8	0.54	0.32	0.72	0.62	0.69
45	LPC 16:1; [M+FA-H]- C24H48NO7P	MS2	M+HCOO	224.071	81.72	0.34	2.03	1.09	0.34	0	0	0	0	0.17	0	80.6	77	80.6	80.6	79.4	83.1	81.7	81.7	83.1	83.1	0.91	0.99	0.92	0.89	0.95	0.64	0.55	0.56	0.82	0.68	0.3	0.46	0.54	0.51	0	0	0	0	0.6	0
45	LPC 16:1; [M+FA-H]- C24H48NO7P	MS2	M+HCOO	325.186	81.72	11.1	7.99	4.68	11.41	4.36	17.68	19.12	13.92	9.68	13.31	80.6	77	80.6	80.6	79.4	83.1	81.7	81.7	83.1	83.1	0.91	0.99	0.92	0.89	0.95	0.64	0.55	0.56	0.82	0.68	0.79	0.44	0.72	0.66	0.67	0.78	0.65	0.65	0.8	0.84
45	LPC 16:1; [M+FA-H]- C24H48NO7P	MS2	M+HCOO	78.9591	81.72	0	0	0	0.1	0	0	0	0	0	0	80.6	77	80.6	80.6	79.4	83.1	81.7	81.7	83.1	83.1	0.91	0.99	0.92	0.89	0.95	0.64	0.55	0.56	0.82	0.68	0	0	0	0.27	0	0	0	0	0	0
45	LPC 16:1; [M+FA-H]- C24H48NO7P	MS2	M+HCOO	363.931	81.72	0	0	0	0	0	0	0	0	0	0	80.6	77	80.6	80.6	79.4	83.1	81.7	81.7	83.1	83.1	0.91	0.99	0.92	0.89	0.95	0.64	0.55	0.56	0.82	0.68	0	0	0	0	0	0	0	0	0	0
46	LPC 16:0; [M+FA-H]- C24H50NO7P	MS1	M+HCOO	540.33	106.19	3293.94	3207.21	4029.7	4231.93	5693.65	1519.53	1353.47	1272.36	3749.14	2661.36	106.3	106.2	106.3	106.3	106.3	106.3	106.3	106.3	106.3	106.3	0.96	0.96	0.97	0.95	0.96	0.96	0.96	0.98	0.96	0.96	0.97	0.98	0.96	0.96	0.97	0.96	0.95	0.97	0.94	0.97
46	LPC 16:0; [M+FA-H]- C24H50NO7P	MS2	M+HCOO	255.233	106.19	455.05	466.49	567.06	578.42	875.43	230.46	181.91	186.76	589.85	422.55	106.3	106.2	106.3	106.3	106.3	106.3	106.3	106.3	106.3	106.3	0.96	0.96	0.97	0.95	0.96	0.96	0.96	0.98	0.96	0.96	0.95	0.98	0.96	0.96	0.97	0.96	0.95	0.97	0.95	0.97
46	LPC 16:0; [M+FA-H]- C24H50NO7P	MS2	M+HCOO	224.069	106.19	38.53	31.93	43.62	43.63	62.89	20.6	10.62	11.97	36.53	27.42	106.3	106.2	106.3	106.3	106.3	106.3	106.3	106.3	106.3	106.3	0.96	0.96	0.97	0.95	0.96	0.96	0.96	0.98	0.96	0.96	0.88	0.97	0.93	0.94	0.96	0.85	0.9	0.89	0.94	0.96
46	LPC 16:0; [M+FA-H]- C24H50NO7P	MS2	M+HCOO	480.309	106.19	143.6	149.85	180.06	183.3	283.23	67.65	55.74	37.78	185.74	126.09	106.3	106.2	106.3	106.3	106.3	106.3	106.3	106.3	106.3	106.3	0.96	0.96	0.97	0.95	0.96	0.96	0.96	0.98	0.96	0.96	0.96	0.97	0.95	0.92	0.96	0.97	0.94	0.99	0.94	0.95
46	LPC 16:0; [M+FA-H]- C24H50NO7P	MS2	M+HCOO	168.043	106.19	4.41	6.04	6.68	8.24	7.68	2.84	2.76	2.69	5.51	6.53	106.3	106.2	106.3	106.3	106.3	106.3	106.3	106.3	106.3	106.3	0.96	0.96	0.97	0.95	0.96	0.96	0.96	0.98	0.96	0.96	0.92	0.96	0.94	0.91	0.96	0.79	0.85	0.9	0.93	0.93
46	LPC 16:0; [M+FA-H]- C24H50NO7P	MS2	M+HCOO	152.996	106.19	4.42	4.51	6.34	4.09	10.35	3.25	2.64	1.94	5.74	5.02	106.3	106.2	106.3	106.3	106.3	106.3	106.3	106.3	106.3	106.3	0.96	0.96	0.97	0.95	0.96	0.96	0.96	0.98	0.96	0.96	0.97	0.99	0.84	0.97	0.83	0.86	0.91	0.73	0.86	0.97
46	LPC 16:0; [M+FA-H]- C24H50NO7P	MS2	M+HCOO	78.9591	106.19	3.43	4.03	3.12	5.17	6.15	1.7	2.24	0.2	2.04	2.99	106.3	106.2	106.3	106.3	106.3	106.3	106.3	106.3	106.3	106.3	0.96	0.96	0.97	0.95	0.96	0.96	0.96	0.98	0.96	0.96	0.97	0.89	0.96	0.91	0.99	0.62	0.98	0.66	0.83	0.91
47	LPC 17:0; [M+FA-H]- C25H52NO7P	MS1	M+HCOO	554.345	120.18	61.35	54.93	71.16	44.45	118.29	29.11	18.41		91.28	51.87	119.7	119.7	119.7	119.7	119.7	119.7	120.2		119.7	119.7	0.99	0.94	0.96	0.98	0.98	0.97	0.86		0.92	0.98	0.74	0.64	0.78	0.66	0.95	0.6	0.92		0.89	0.7
47	LPC 17:0; [M+FA-H]- C25H52NO7P	MS2	M+HCOO	269.25	120.18	9.92	6.35	6.61	6.15	12.37	5.14	3.49		7.9	4.23	119.7	119.7	119.7	119.7	119.7	119.7	120.2		119.7	119.7	0.99	0.94	0.96	0.98	0.98	0.97	0.86		0.92	0.98	0.95	0.74	0.94	0.85	0.95	0.71	0.92		0.89	0.88
47	LPC 17:0; [M+FA-H]- C25H52NO7P	MS2	M+HCOO	494.32	120.18	1.51	1.88	1.38	0.63	4.49	0.37	3.88		3.5	0.75	119.7	119.7	119.7	119.7	119.7	119.7	120.2		119.7	119.7	0.99	0.94	0.96	0.98	0.98	0.97	0.86		0.92	0.98	0.52	0.64	0.78	0.66	0.95	0.6	0.92		0.93	0.41
47	LPC 17:0; [M+FA-H]- C25H52NO7P	MS2	M+HCOO	224.068	120.18	0.42	0	1.01	0	0.68	0	0		0.85	0.17	119.7	119.7	119.7	119.7	119.7	119.7	120.2		119.7	119.7	0.99	0.94	0.96	0.98	0.98	0.97	0.86		0.92	0.98	0.74	0	0.53	0	0.53	0	0		0.44	0.7
48	Pinolenic acid [M-H]- C18H30O2 NIST 1208097	MS1	2M-H	555.441	117.78					136.08										117.2										0.99										0.77
48	Pinolenic acid [M-H]- C18H30O2 NIST 1208097	MS2	2M-H	277.217	117.78					156.31										117.2										0.99										0.85
48	Pinolenic acid [M-H]- C18H30O2 NIST 1208097	MS2	2M-H	270.255	117.78					0										117.2										0.99										0
48	Pinolenic acid [M-H]- C18H30O2 NIST 1208097	MS2	2M-H	233.235	117.78					0.86										117.2										0.99										0.74
48	Pinolenic acid [M-H]- C18H30O2 NIST 1208097	MS2	2M-H	259.206	117.78					0.73										117.2										0.99										0.64
48	Pinolenic acid [M-H]- C18H30O2 NIST 1208097	MS2	2M-H	59.016	117.78					0.09										117.2										0.99										0.42
48	Pinolenic acid [M-H]- C18H30O2 NIST 1208097	MS2	2M-H	276.365	117.78					0.94										117.2										0.99										0.77
49	Linoleic acid C18H32O2 MoNA 436606	MS1	2M-H	559.472	135.14	806.82	273.11	870.81	992.81	1820.77						134.3	134.3	135.5	135.5	134.3						0.93	0.92	0.92	0.92	0.92						0.97	0.96	0.99	0.95	0.94
49	Linoleic acid C18H32O2 MoNA 436606	MS2	2M-H	279.233	135.14	1691.57	554.75	1586.36	1770.14	3909.13						134.3	134.3	135.5	135.5	134.3						0.93	0.92	0.92	0.92	0.92						0.98	0.96	0.99	0.95	0.94
49	Linoleic acid C18H32O2 MoNA 436606	MS2	2M-H	261.222	135.14	3.74	1.63	1.85	4.7	10.88						134.3	134.3	135.5	135.5	134.3						0.93	0.92	0.92	0.92	0.92						0.92	0.89	0.51	0.94	0.88
49	Linoleic acid C18H32O2 MoNA 436606	MS2	2M-H	278.371	135.14	8.74	3.07	8.11	4.19	19.68						134.3	134.3	135.5	135.5	134.3						0.93	0.92	0.92	0.92	0.92						0.82	0.98	0.97	0.79	0.94
49	Linoleic acid C18H32O2 MoNA 436606	MS2	2M-H	59.0138	135.14	0.3	0.35	0.52	0.6	1.89						134.3	134.3	135.5	135.5	134.3						0.93	0.92	0.92	0.92	0.92						0.61	0.88	0.98	0.85	0.77
49	Linoleic acid C18H32O2 MoNA 436606	MS2	2M-H	281.159	135.14	0	0	0.76	0	0.84						134.3	134.3	135.5	135.5	134.3						0.93	0.92	0.92	0.92	0.92						0	0	0.76	0	0.91
49	Linoleic acid C18H32O2 MoNA 436606	MS2	2M-H	280.24	135.14	331.26	114.42	328.28	348.61	755.28						134.3	134.3	135.5	135.5	134.3						0.93	0.92	0.92	0.92	0.92						0.97	0.94	0.99	0.97	0.94
50	1-(9Z,12Z,15Z-Octadecatrienoyl)-2-hydroxy-sn-glycero-3-phosphocholine (NMR) C26H48NO7P---LPC 18:3; [M+FA-H]- C26H48NO7P	MS1	M+HCOO	562.314	72.48		374.05	123.81	44.13	357.5							72.1	72.1	72.1	72.1							0.92	0.88	0.95	0.93							0.9	0.87	0.63	0.78
50	1-(9Z,12Z,15Z-Octadecatrienoyl)-2-hydroxy-sn-glycero-3-phosphocholine (NMR) C26H48NO7P---LPC 18:3; [M+FA-H]- C26H48NO7P	MS2	M+HCOO	277.217	72.48		33.58	12.3	7.44	34.86							72.1	72.1	72.1	72.1							0.92	0.88	0.95	0.93							0.98	0.93	0.9	0.93
50	1-(9Z,12Z,15Z-Octadecatrienoyl)-2-hydroxy-sn-glycero-3-phosphocholine (NMR) C26H48NO7P---LPC 18:3; [M+FA-H]- C26H48NO7P	MS2	M+HCOO	242.079	72.48		0.88	0	0	1.58							72.1	72.1	72.1	72.1							0.92	0.88	0.95	0.93							0.62	0	0	0.74
50	1-(9Z,12Z,15Z-Octadecatrienoyl)-2-hydroxy-sn-glycero-3-phosphocholine (NMR) C26H48NO7P---LPC 18:3; [M+FA-H]- C26H48NO7P	MS2	M+HCOO	502.296	72.48		8.51	5.04	0.25	8.65							72.1	72.1	72.1	72.1							0.92	0.88	0.95	0.93							0.9	0.87	0.63	0.78
50	1-(9Z,12Z,15Z-Octadecatrienoyl)-2-hydroxy-sn-glycero-3-phosphocholine (NMR) C26H48NO7P---LPC 18:3; [M+FA-H]- C26H48NO7P	MS2	M+HCOO	233.229	72.48		0	0	0	1.03							72.1	72.1	72.1	72.1							0.92	0.88	0.95	0.93							0	0	0	0.65
50	1-(9Z,12Z,15Z-Octadecatrienoyl)-2-hydroxy-sn-glycero-3-phosphocholine (NMR) C26H48NO7P---LPC 18:3; [M+FA-H]- C26H48NO7P	MS2	M+HCOO	259.206	72.48		0	0	0	0							72.1	72.1	72.1	72.1							0.92	0.88	0.95	0.93							0	0	0	0
50	1-(9Z,12Z,15Z-Octadecatrienoyl)-2-hydroxy-sn-glycero-3-phosphocholine (NMR) C26H48NO7P---LPC 18:3; [M+FA-H]- C26H48NO7P	MS2	M+HCOO	224.067	72.48		0	0	0	0							72.1	72.1	72.1	72.1							0.92	0.88	0.95	0.93							0	0	0	0
51	Elaidic acid C18H34O2 MoNA 440469---Oleic acid C18H34O2 MoNA 440469---Trans-Vaccenic acid C18H34O2	MS1	2M-H	563.504	153.33	857.27	594.44	1121.84	1891.02	2035.84	7.42		4.79	3.91	4.99	152.6	152.6	152.6	152.6	152.6	153.3		153.3	153.3	153.3	0.93	0.92	0.93	0.93	0.93	0.95		0.86	0.87	0.94	0.95	0.94	0.96	0.92	0.88	0.76		0.82	0.8	0.93
51	Elaidic acid C18H34O2 MoNA 440469---Oleic acid C18H34O2 MoNA 440469---Trans-Vaccenic acid C18H34O2	MS2	2M-H	281.249	153.33	1260.22	834.85	1369.94	2715.57	2581.6	6.82		8.55	3.85	7.88	152.6	152.6	152.6	152.6	152.6	153.3		153.3	153.3	153.3	0.93	0.92	0.93	0.93	0.93	0.95		0.86	0.87	0.94	0.95	0.94	0.96	0.92	0.88	0.83		0.9	0.86	0.98
51	Elaidic acid C18H34O2 MoNA 440469---Oleic acid C18H34O2 MoNA 440469---Trans-Vaccenic acid C18H34O2	MS2	2M-H	280.379	153.33	6.41	6.17	6.57	8.08	12.78	0		0	0	0	152.6	152.6	152.6	152.6	152.6	153.3		153.3	153.3	153.3	0.93	0.92	0.93	0.93	0.93	0.95		0.86	0.87	0.94	0.89	0.99	0.96	1	0.87	0		0	0	0
51	Elaidic acid C18H34O2 MoNA 440469---Oleic acid C18H34O2 MoNA 440469---Trans-Vaccenic acid C18H34O2	MS2	2M-H	282.254	153.33	254.68	187.56	270.35	505.14	485.77	0.75		2.64	0.57	0.85	152.6	152.6	152.6	152.6	152.6	153.3		153.3	153.3	153.3	0.93	0.92	0.93	0.93	0.93	0.95		0.86	0.87	0.94	0.95	0.94	0.95	0.92	0.87	0.76		0.82	0.8	0.93
51	Elaidic acid C18H34O2 MoNA 440469---Oleic acid C18H34O2 MoNA 440469---Trans-Vaccenic acid C18H34O2	MS2	2M-H	283.349	153.33	0	0	0	0	0	0		0	0	0	152.6	152.6	152.6	152.6	152.6	153.3		153.3	153.3	153.3	0.93	0.92	0.93	0.93	0.93	0.95		0.86	0.87	0.94	0	0	0	0	0	0		0	0	0
51	Elaidic acid C18H34O2 MoNA 440469---Oleic acid C18H34O2 MoNA 440469---Trans-Vaccenic acid C18H34O2	MS2	2M-H	283.198	153.33	0.57	0	0	0	0.57	0		0	0	0	152.6	152.6	152.6	152.6	152.6	153.3		153.3	153.3	153.3	0.93	0.92	0.93	0.93	0.93	0.95		0.86	0.87	0.94	0.93	0	0	0	0.99	0		0	0	0
51	Elaidic acid C18H34O2 MoNA 440469---Oleic acid C18H34O2 MoNA 440469---Trans-Vaccenic acid C18H34O2	MS2	2M-H	280.411	153.33	0	0	0	0	0.84	0		0	0	0	152.6	152.6	152.6	152.6	152.6	153.3		153.3	153.3	153.3	0.93	0.92	0.93	0.93	0.93	0.95		0.86	0.87	0.94	0	0	0	0	0.43	0		0	0	0
52	1-(9Z,12Z-Octadecadienoyl-2-hydroxy-sn-glycero-3-phosphocholine (NMR) C26H50NO7P---1-Hydroxy-2-(9Z,12Z,15Z-octadecatrienoyl)-sn-glycero-2-phosphocholine (NMR) C26H50NO7P---LPC 18:2; [M+FA-H]- C26H50NO7P	MS1	M+HCOO	564.331	87.75	4067.28	17844.2	5246.26	2718.11	17502.2	484.4	398.53	348.58	1101.47	508.14	86.7	86.7	86.7	87.9	86.7	89.2	89.2	90.4	89.2	89.2	0.97	0.98	0.97	0.97	0.97	0.97	0.96	0.91	0.96	0.96	0.94	0.98	0.94	0.89	0.97	0.86	0.9	0.81	0.89	0.88
52	1-(9Z,12Z-Octadecadienoyl-2-hydroxy-sn-glycero-3-phosphocholine (NMR) C26H50NO7P---1-Hydroxy-2-(9Z,12Z,15Z-octadecatrienoyl)-sn-glycero-2-phosphocholine (NMR) C26H50NO7P---LPC 18:2; [M+FA-H]- C26H50NO7P	MS2	M+HCOO	279.233	87.75	765.28	3289.05	936.83	478.61	3459.04	69.63	66.84	42.67	176.16	81.91	86.7	86.7	86.7	87.9	86.7	89.2	89.2	90.4	89.2	89.2	0.97	0.98	0.97	0.97	0.97	0.97	0.96	0.91	0.96	0.96	0.95	0.98	0.94	0.95	0.96	0.9	0.9	0.9	0.95	0.92
52	1-(9Z,12Z-Octadecadienoyl-2-hydroxy-sn-glycero-3-phosphocholine (NMR) C26H50NO7P---1-Hydroxy-2-(9Z,12Z,15Z-octadecatrienoyl)-sn-glycero-2-phosphocholine (NMR) C26H50NO7P---LPC 18:2; [M+FA-H]- C26H50NO7P	MS2	M+HCOO	504.309	87.75	129.2	507.39	141.87	88.16	534.21	15.82	12.83	14.57	38.28	17.34	86.7	86.7	86.7	87.9	86.7	89.2	89.2	90.4	89.2	89.2	0.97	0.98	0.97	0.97	0.97	0.97	0.96	0.91	0.96	0.96	0.94	0.97	0.94	0.89	0.97	0.86	0.93	0.81	0.89	0.88
52	1-(9Z,12Z-Octadecadienoyl-2-hydroxy-sn-glycero-3-phosphocholine (NMR) C26H50NO7P---1-Hydroxy-2-(9Z,12Z,15Z-octadecatrienoyl)-sn-glycero-2-phosphocholine (NMR) C26H50NO7P---LPC 18:2; [M+FA-H]- C26H50NO7P	MS2	M+HCOO	242.079	87.75	15.47	67.37	13.82	5.06	70.56	0	0.35	0	2.89	0	86.7	86.7	86.7	87.9	86.7	89.2	89.2	90.4	89.2	89.2	0.97	0.98	0.97	0.97	0.97	0.97	0.96	0.91	0.96	0.96	0.89	0.98	0.94	0.84	0.96	0	0.55	0	0.85	0
52	1-(9Z,12Z-Octadecadienoyl-2-hydroxy-sn-glycero-3-phosphocholine (NMR) C26H50NO7P---1-Hydroxy-2-(9Z,12Z,15Z-octadecatrienoyl)-sn-glycero-2-phosphocholine (NMR) C26H50NO7P---LPC 18:2; [M+FA-H]- C26H50NO7P	MS2	M+HCOO	168.043	87.75	4.35	16.62	4.72	2.99	19.56	0	0	0	0	0	86.7	86.7	86.7	87.9	86.7	89.2	89.2	90.4	89.2	89.2	0.97	0.98	0.97	0.97	0.97	0.97	0.96	0.91	0.96	0.96	0.84	0.99	0.92	0.74	0.96	0	0	0	0	0
52	1-(9Z,12Z-Octadecadienoyl-2-hydroxy-sn-glycero-3-phosphocholine (NMR) C26H50NO7P---1-Hydroxy-2-(9Z,12Z,15Z-octadecatrienoyl)-sn-glycero-2-phosphocholine (NMR) C26H50NO7P---LPC 18:2; [M+FA-H]- C26H50NO7P	MS2	M+HCOO	224.069	87.75	4.61	21.25	6.1	6.53	22.26	0	0	1.01	5.47	0	86.7	86.7	86.7	87.9	86.7	89.2	89.2	90.4	89.2	89.2	0.97	0.98	0.97	0.97	0.97	0.97	0.96	0.91	0.96	0.96	0.76	0.96	0.9	0.42	0.97	0	0	0.5	0.71	0
52	1-(9Z,12Z-Octadecadienoyl-2-hydroxy-sn-glycero-3-phosphocholine (NMR) C26H50NO7P---1-Hydroxy-2-(9Z,12Z,15Z-octadecatrienoyl)-sn-glycero-2-phosphocholine (NMR) C26H50NO7P---LPC 18:2; [M+FA-H]- C26H50NO7P	MS2	M+HCOO	152.995	87.75	4.44	14.07	4.77	2.77	18.34	0.42	0	0	0	0	86.7	86.7	86.7	87.9	86.7	89.2	89.2	90.4	89.2	89.2	0.97	0.98	0.97	0.97	0.97	0.97	0.96	0.91	0.96	0.96	0.85	0.95	0.78	0.7	0.94	0.24	0	0	0	0
53	LPC 18:1; [M+FA-H]- C26H52NO7P	MS1	M+HCOO	566.346	110.25	1360.36	2993.95	1732.99	1513.94	3110.23	406.24	347.31	206.64	837.85	482.91	109.9	107.5	109.9	109.9	108.7	111.1	111.1	111.1	111.1	111.1	0.95	0.98	0.96	0.97	0.98	0.95	0.93	0.93	0.96	0.95	0.89	0.94	0.88	0.93	0.91	0.91	0.91	0.83	0.87	0.85
53	LPC 18:1; [M+FA-H]- C26H52NO7P	MS2	M+HCOO	281.249	110.25	243.58	640.02	296.17	265.25	631.91	52.49	49.5	35.01	156.07	71.53	109.9	107.5	109.9	109.9	108.7	111.1	111.1	111.1	111.1	111.1	0.95	0.98	0.96	0.97	0.98	0.95	0.93	0.93	0.96	0.95	0.93	0.95	0.94	0.94	0.95	0.92	0.95	0.87	0.91	0.85
53	LPC 18:1; [M+FA-H]- C26H52NO7P	MS2	M+HCOO	506.324	110.25	57.3	112.16	64.8	55.48	130.08	18.88	18.51	10.07	38.68	23.25	109.9	107.5	109.9	109.9	108.7	111.1	111.1	111.1	111.1	111.1	0.95	0.98	0.96	0.97	0.98	0.95	0.93	0.93	0.96	0.95	0.89	0.94	0.88	0.93	0.91	0.91	0.91	0.83	0.87	0.94
53	LPC 18:1; [M+FA-H]- C26H52NO7P	MS2	M+HCOO	224.069	110.25	5.36	5.1	8.13	8.63	14.27	1.59	1	0.34	7.47	1.92	109.9	107.5	109.9	109.9	108.7	111.1	111.1	111.1	111.1	111.1	0.95	0.98	0.96	0.97	0.98	0.95	0.93	0.93	0.96	0.95	0.83	0.56	0.78	0.78	0.67	0.51	0.61	0.66	0.74	0.82
53	LPC 18:1; [M+FA-H]- C26H52NO7P	MS2	M+HCOO	152.996	110.25	0	4.57	4.24	3.85	0	1.32	0	0	1.81	2.09	109.9	107.5	109.9	109.9	108.7	111.1	111.1	111.1	111.1	111.1	0.95	0.98	0.96	0.97	0.98	0.95	0.93	0.93	0.96	0.95	0	0.89	0.76	0.81	0	0.5	0	0	0.54	0.74
53	LPC 18:1; [M+FA-H]- C26H52NO7P	MS2	M+HCOO	168.042	110.25	1.38	2.62	2.4	1.96	2.99	0.29	0	0	1.02	0.44	109.9	107.5	109.9	109.9	108.7	111.1	111.1	111.1	111.1	111.1	0.95	0.98	0.96	0.97	0.98	0.95	0.93	0.93	0.96	0.95	0.68	0.79	0.73	0.68	0.75	0.53	0	0	0.43	0.44
53	LPC 18:1; [M+FA-H]- C26H52NO7P	MS2	M+HCOO	78.9582	110.25	0	0.9	0	1.1	0	0	0	0.55	0	0.5	109.9	107.5	109.9	109.9	108.7	111.1	111.1	111.1	111.1	111.1	0.95	0.98	0.96	0.97	0.98	0.95	0.93	0.93	0.96	0.95	0	0.9	0	0.66	0	0	0	0.42	0	0.36
54	Stearic acid C18H36O2 Bruker-Sumner MetaboBASE Plant Library 373949---Stearic acid C18H36O2 MoNA 440441	MS1	2M-H	567.535	171.78	423.43	488.26	390.19	417.62	454	507.87	403.22	365.62	345.16	383.2	172.2	172.1	172.2	172.2	172.2	172.2	172.2	172.2	172.2	172.2	0.93	0.93	0.93	0.94	0.91	0.93	0.93	0.93	0.92	0.94	0.97	0.97	0.98	0.92	0.91	0.97	0.93	0.99	0.9	0.96
54	Stearic acid C18H36O2 Bruker-Sumner MetaboBASE Plant Library 373949---Stearic acid C18H36O2 MoNA 440441	MS2	2M-H	283.263	171.78	590.58	685.6	431.29	429.78	523.77	563.63	527.96	326.71	378.05	477.52	172.2	172.1	172.2	172.2	172.2	172.2	172.2	172.2	172.2	172.2	0.93	0.93	0.93	0.94	0.91	0.93	0.93	0.93	0.92	0.94	0.97	0.97	0.98	0.92	0.95	0.97	0.91	0.99	0.9	0.96
54	Stearic acid C18H36O2 Bruker-Sumner MetaboBASE Plant Library 373949---Stearic acid C18H36O2 MoNA 440441	MS2	2M-H	282.392	171.78	1.78	1.41	1.04	2.16	2.26	1.71	3.37	0.95	1.32	3.2	172.2	172.1	172.2	172.2	172.2	172.2	172.2	172.2	172.2	172.2	0.93	0.93	0.93	0.94	0.91	0.93	0.93	0.93	0.92	0.94	0.92	0.7	0.53	0.85	0.85	0.66	0.98	0.87	0.92	0.91
54	Stearic acid C18H36O2 Bruker-Sumner MetaboBASE Plant Library 373949---Stearic acid C18H36O2 MoNA 440441	MS2	2M-H	284.265	171.78	113.38	137.8	80.56	78.65	107.36	116.31	107.62	68.07	79.61	89.27	172.2	172.1	172.2	172.2	172.2	172.2	172.2	172.2	172.2	172.2	0.93	0.93	0.93	0.94	0.91	0.93	0.93	0.93	0.92	0.94	0.97	0.98	0.98	0.94	0.91	0.97	0.93	0.99	0.88	0.96
54	Stearic acid C18H36O2 Bruker-Sumner MetaboBASE Plant Library 373949---Stearic acid C18H36O2 MoNA 440441	MS2	2M-H	765.599	171.78	0	0	0	0	0	0	0	0	0	0	172.2	172.1	172.2	172.2	172.2	172.2	172.2	172.2	172.2	172.2	0.93	0.93	0.93	0.94	0.91	0.93	0.93	0.93	0.92	0.94	0	0	0	0	0	0	0	0	0	0
54	Stearic acid C18H36O2 Bruker-Sumner MetaboBASE Plant Library 373949---Stearic acid C18H36O2 MoNA 440441	MS2	2M-H	265.25	171.78	0	0.55	0	0	0	0	0	0	0	0	172.2	172.1	172.2	172.2	172.2	172.2	172.2	172.2	172.2	172.2	0.93	0.93	0.93	0.94	0.91	0.93	0.93	0.93	0.92	0.94	0	0.7	0	0	0	0	0	0	0	0
54	Stearic acid C18H36O2 Bruker-Sumner MetaboBASE Plant Library 373949---Stearic acid C18H36O2 MoNA 440441	MS2	2M-H	289.916	171.78	0	0	0	0	0	0	0	0	0	0	172.2	172.1	172.2	172.2	172.2	172.2	172.2	172.2	172.2	172.2	0.93	0.93	0.93	0.94	0.91	0.93	0.93	0.93	0.92	0.94	0	0	0	0	0	0	0	0	0	0
55	LPC 18:0; [M+FA-H]- C26H54NO7P	MS1	M+HCOO	568.362	133.34	1896.49	1461.5	2269.56	2411.29	2644.97	840.63	770.95	745.31	2239.56	1860.98	133.1	133.1	133.1	133.1	133.1	133.1	133.1	133.1	133.1	133.1	0.97	0.97	0.97	0.96	0.96	0.98	0.96	0.96	0.97	0.96	0.92	0.94	0.91	0.91	0.87	0.95	0.9	0.94	0.95	0.96
55	LPC 18:0; [M+FA-H]- C26H54NO7P	MS2	M+HCOO	283.264	133.34	368.21	245.55	434.62	457.24	640.77	153.13	143.2	132.24	347.78	298.52	133.1	133.1	133.1	133.1	133.1	133.1	133.1	133.1	133.1	133.1	0.97	0.97	0.97	0.96	0.96	0.98	0.96	0.96	0.97	0.96	0.91	0.94	0.9	0.91	0.87	0.95	0.9	0.94	0.95	0.95
55	LPC 18:0; [M+FA-H]- C26H54NO7P	MS2	M+HCOO	508.341	133.34	139.93	102.27	151.44	206.69	269.13	52.15	53.61	50.5	148.7	118.43	133.1	133.1	133.1	133.1	133.1	133.1	133.1	133.1	133.1	133.1	0.97	0.97	0.97	0.96	0.96	0.98	0.96	0.96	0.97	0.96	0.92	0.91	0.9	0.88	0.84	0.84	0.91	0.95	0.9	0.96
55	LPC 18:0; [M+FA-H]- C26H54NO7P	MS2	M+HCOO	224.069	133.34	25.89	13.36	31.77	32.52	41.19	6.9	7.87	8.28	18.92	14.91	133.1	133.1	133.1	133.1	133.1	133.1	133.1	133.1	133.1	133.1	0.97	0.97	0.97	0.96	0.96	0.98	0.96	0.96	0.97	0.96	0.92	0.95	0.91	0.89	0.84	0.96	0.85	0.89	0.95	0.95
55	LPC 18:0; [M+FA-H]- C26H54NO7P	MS2	M+HCOO	242.08	133.34	4.7	2.52	6.36	6.35	9.05	2.18	0.88	1.83	5.57	3.57	133.1	133.1	133.1	133.1	133.1	133.1	133.1	133.1	133.1	133.1	0.97	0.97	0.97	0.96	0.96	0.98	0.96	0.96	0.97	0.96	0.93	0.84	0.91	0.94	0.83	0.95	0.8	0.81	0.46	0.86
55	LPC 18:0; [M+FA-H]- C26H54NO7P	MS2	M+HCOO	168.043	133.34	4.35	1.74	4.85	3.91	5.73	1.09	0.73	0.94	5.82	5.24	133.1	133.1	133.1	133.1	133.1	133.1	133.1	133.1	133.1	133.1	0.97	0.97	0.97	0.96	0.96	0.98	0.96	0.96	0.97	0.96	0.87	0.84	0.83	0.88	0.87	0.79	0.27	0.78	0.89	0.96
55	LPC 18:0; [M+FA-H]- C26H54NO7P	MS2	M+HCOO	78.9587	133.34	1.89	1.35	2.93	1.74	2.05	1.3	0	0.4	1.24	1.35	133.1	133.1	133.1	133.1	133.1	133.1	133.1	133.1	133.1	133.1	0.97	0.97	0.97	0.96	0.96	0.98	0.96	0.96	0.97	0.96	0.63	0.71	0.94	0.66	0.7	0.93	0	0.78	0.82	0.84
56	FAHFA 38:6; FAHFA 18:2/20:4; [M-H]- C38H62O4	MS1	M-H	581.455	135.14	165.76	68.44	169.92	167.73	310.15						134.3	134.3	134.3	135.5	134.3						0.98	0.93	0.98	0.98	0.98						0.93	0.73	0.95	0.97	0.87
56	FAHFA 38:6; FAHFA 18:2/20:4; [M-H]- C38H62O4	MS2	M-H	279.233	135.14	89.89	14.63	78.06	87.53	146.6						134.3	134.3	134.3	135.5	134.3						0.98	0.93	0.98	0.98	0.98						0.93	0.73	0.95	0.97	0.87
56	FAHFA 38:6; FAHFA 18:2/20:4; [M-H]- C38H62O4	MS2	M-H	581.453	135.14	15.62	3.77	11.33	14.93	26.16						134.3	134.3	134.3	135.5	134.3						0.98	0.93	0.98	0.98	0.98						0.98	0.67	0.96	1	0.77
56	FAHFA 38:6; FAHFA 18:2/20:4; [M-H]- C38H62O4	MS2	M-H	301.219	135.14	0.39	0.29	0.78	0	0.59						134.3	134.3	134.3	135.5	134.3						0.98	0.93	0.98	0.98	0.98						0.87	0	0.49	0	1
56	FAHFA 38:6; FAHFA 18:2/20:4; [M-H]- C38H62O4	MS2	M-H	255.233	135.14	1.22	1.79	5.24	2.86	3.39						134.3	134.3	134.3	135.5	134.3						0.98	0.93	0.98	0.98	0.98						0.66	0.92	0.94	0.76	0.51
56	FAHFA 38:6; FAHFA 18:2/20:4; [M-H]- C38H62O4	MS2	M-H	278.381	135.14	0	0	0.94	0	0						134.3	134.3	134.3	135.5	134.3						0.98	0.93	0.98	0.98	0.98						0	0	0.84	0	0
56	FAHFA 38:6; FAHFA 18:2/20:4; [M-H]- C38H62O4	MS2	M-H	261.214	135.14	0	0	0.37	0	0						134.3	134.3	134.3	135.5	134.3						0.98	0.93	0.98	0.98	0.98						0	0	0.52	0	0
56	ISF of FAHFA 38:6; FAHFA 18:2/20:4; [M-H]- C38H62O4	MS1	-	279.235	135.71	61533.9	20216	56814.9	49776.3	105018						135.5	135.5	135.5	135.5	135.7						1	0.99	0.99	0.99	1						0.95	0.91	0.96	0.91	0.88
56	ISF of FAHFA 38:6; FAHFA 18:2/20:4; [M-H]- C38H62O4	MS2	-	279.233	135.71	205.79	80.62	204.93	147.29	460.79						135.5	135.5	135.5	135.5	135.7						1	0.99	0.99	0.99	1						0.99	0.99	1	0.97	0.87
56	ISF of FAHFA 38:6; FAHFA 18:2/20:4; [M-H]- C38H62O4	MS2	-	261.222	135.71	3.7	2.37	2.53	2.17	8.56						135.5	135.5	135.5	135.5	135.7						1	0.99	0.99	0.99	1						0.95	0.91	0.96	0.82	0.85
56	ISF of FAHFA 38:6; FAHFA 18:2/20:4; [M-H]- C38H62O4	MS2	-	59.013	135.71	0.52	0.09	0	0.35	1.16						135.5	135.5	135.5	135.5	135.7						1	0.99	0.99	0.99	1						0.8	0.81	0	0.91	0.88
56	ISF of FAHFA 38:6; FAHFA 18:2/20:4; [M-H]- C38H62O4	MS2	-	211.396	135.71	0	0	0	0	0						135.5	135.5	135.5	135.5	135.7						1	0.99	0.99	0.99	1						0	0	0	0	0
56	ISF of FAHFA 38:6; FAHFA 18:2/20:4; [M-H]- C38H62O4	MS2	-	95.0503	135.71	0.44	0	0.44	0	0.44						135.5	135.5	135.5	135.5	135.7						1	0.99	0.99	0.99	1						0.8	0	0.75	0	0.93
56	ISF of FAHFA 38:6; FAHFA 18:2/20:4; [M-H]- C38H62O4	MS2	-	286.336	135.71	0	0	0	0	0						135.5	135.5	135.5	135.5	135.7						1	0.99	0.99	0.99	1						0	0	0	0	0
57	LPC 19:0; [M+FA-H]- C27H56NO7P	MS1	M+HCOO	582.377	144.96	48.36	38.54	58.59	41.27	73.21			28.51	85.81	40.37	145.3	145.3	145.3	145.3	145.3			145.3	145.3	145.3	0.92	0.8	0.85	0.82	0.9			0.84	0.97	0.87	0.92	0.67	0.79	0.77	0.96			0.6	0.9	0.81
57	LPC 19:0; [M+FA-H]- C27H56NO7P	MS2	M+HCOO	297.28	144.96	7.6	3.38	7.91	3.08	11.56			4.36	11.27	6.28	145.3	145.3	145.3	145.3	145.3			145.3	145.3	145.3	0.92	0.8	0.85	0.82	0.9			0.84	0.97	0.87	0.92	0.97	0.9	0.77	0.96			0.48	0.92	0.86
57	LPC 19:0; [M+FA-H]- C27H56NO7P	MS2	M+HCOO	522.359	144.96	4.61	1.79	1.93	2.7	7.04			0.26	2.58	1.28	145.3	145.3	145.3	145.3	145.3			145.3	145.3	145.3	0.92	0.8	0.85	0.82	0.9			0.84	0.97	0.87	0.97	0.67	0.79	0.86	0.97			0.6	0.9	0.54
57	LPC 19:0; [M+FA-H]- C27H56NO7P	MS2	M+HCOO	224.07	144.96	0.67	0	0.84	0	0			0.68	0.75	0	145.3	145.3	145.3	145.3	145.3			145.3	145.3	145.3	0.92	0.8	0.85	0.82	0.9			0.84	0.97	0.87	0.57	0	0.56	0	0			0.47	0.52	0
57	LPC 19:0; [M+FA-H]- C27H56NO7P	MS2	M+HCOO	223.028	144.96	7.53	9.45	13.48	8.13	7.54			2.26	4.93	4.52	145.3	145.3	145.3	145.3	145.3			145.3	145.3	145.3	0.92	0.8	0.85	0.82	0.9			0.84	0.97	0.87	0.72	0.51	0.49	0.59	0.62			0.46	0.82	0.81
57	LPC 19:0; [M+FA-H]- C27H56NO7P	MS2	M+HCOO	224.027	144.96	1.84	1.34	3.34	1.35	1.84			0	0.5	0	145.3	145.3	145.3	145.3	145.3			145.3	145.3	145.3	0.92	0.8	0.85	0.82	0.9			0.84	0.97	0.87	0.32	0.34	0.51	0.53	0.21			0	0.52	0
57	LPC 19:0; [M+FA-H]- C27H56NO7P	MS2	M+HCOO	165.04	144.96	0	0.87	2.09	1.02	0.72			1.16	0.58	0	145.3	145.3	145.3	145.3	145.3			145.3	145.3	145.3	0.92	0.8	0.85	0.82	0.9			0.84	0.97	0.87	0	0.57	0.6	0.64	0.64			0.81	0.56	0
58	Cer-NS d34:1; Cer-NS d18:1/16:0; [M-H]- C34H67NO3	MS1	M+HCOO	582.509	251.71	486.06	294.62	594.57	686.83	586.28	341.87	267.75	218.21	651.24	440.06	251.5	251.5	251.5	251.5	251.5	251.5	251.5	251.5	251.5	251.5	0.9	0.89	0.95	0.92	0.95	0.93	0.88	0.84	0.93	0.84	0.83	0.92	0.97	0.95	0.96	0.79	0.75	0.74	0.97	0.8
58	Cer-NS d34:1; Cer-NS d18:1/16:0; [M-H]- C34H67NO3	MS2	M+HCOO	280.264	251.71	4.12	2.53	9.16	4.78	3.09	2.9	1.31	1.7	5.9	0.94	251.5	251.5	251.5	251.5	251.5	251.5	251.5	251.5	251.5	251.5	0.9	0.89	0.95	0.92	0.95	0.93	0.88	0.84	0.93	0.84	0.95	0.9	0.99	0.98	0.81	0.77	0.71	0.89	0.99	0.8
58	Cer-NS d34:1; Cer-NS d18:1/16:0; [M-H]- C34H67NO3	MS2	M+HCOO	536.505	251.71	13.36	11.01	13.34	17.83	18.94	8.8	7.39	5.83	13.99	8.16	251.5	251.5	251.5	251.5	251.5	251.5	251.5	251.5	251.5	251.5	0.9	0.89	0.95	0.92	0.95	0.93	0.88	0.84	0.93	0.84	0.83	0.94	0.97	0.95	0.96	0.82	0.85	0.7	0.89	0.96
58	Cer-NS d34:1; Cer-NS d18:1/16:0; [M-H]- C34H67NO3	MS2	M+HCOO	237.222	251.71	2.58	2.5	2.33	1.81	2.68	1.21	0.17	0.26	3.1	1.82	251.5	251.5	251.5	251.5	251.5	251.5	251.5	251.5	251.5	251.5	0.9	0.89	0.95	0.92	0.95	0.93	0.88	0.84	0.93	0.84	0.79	0.53	0.87	0.82	0.71	0.44	0.75	0.74	0.97	0.77
58	Cer-NS d34:1; Cer-NS d18:1/16:0; [M-H]- C34H67NO3	MS2	M+HCOO	488.482	251.71	0	0	0.5	0.75	0.5	1.25	1	0	0.87	0	251.5	251.5	251.5	251.5	251.5	251.5	251.5	251.5	251.5	251.5	0.9	0.89	0.95	0.92	0.95	0.93	0.88	0.84	0.93	0.84	0	0	0.43	0.37	0.73	0.79	0.33	0	0.71	0
58	Cer-NS d34:1; Cer-NS d18:1/16:0; [M-H]- C34H67NO3	MS2	M+HCOO	506.495	251.71	0.76	1.9	1.14	1.52	0.51	1.27	0.25	0	0	1.52	251.5	251.5	251.5	251.5	251.5	251.5	251.5	251.5	251.5	251.5	0.9	0.89	0.95	0.92	0.95	0.93	0.88	0.84	0.93	0.84	0.35	0.92	0.64	0.53	0.36	0.31	0.75	0	0	0.27
58	Cer-NS d34:1; Cer-NS d18:1/16:0; [M-H]- C34H67NO3	MS2	M+HCOO	263.242	251.71	0	0.18	0	0	1.28	0	0	0.55	0.37	0	251.5	251.5	251.5	251.5	251.5	251.5	251.5	251.5	251.5	251.5	0.9	0.89	0.95	0.92	0.95	0.93	0.88	0.84	0.93	0.84	0	0.44	0	0	0.96	0	0	0.74	0.52	0
59	FAHFA 38:5; FAHFA 20:4/18:1; [M-H]- C38H64O4	MS1	M-H	583.471	133.81	60.74	18.09	35.9	48.58	83.16						133.8	133.8	134.3	134.3	134.3						0.94	0.96	0.97	0.97	0.95						0.89	0.62	0.89	0.87	0.77
59	FAHFA 38:5; FAHFA 20:4/18:1; [M-H]- C38H64O4	MS2	M-H	303.233	133.81	69.42	16.12	34.97	44.49	104.46						133.8	133.8	134.3	134.3	134.3						0.94	0.96	0.97	0.97	0.95						0.64	0.62	0.53	0.49	0.77
59	FAHFA 38:5; FAHFA 20:4/18:1; [M-H]- C38H64O4	MS2	M-H	279.232	133.81	134.83	25.87	58.13	66.01	146.6						133.8	133.8	134.3	134.3	134.3						0.94	0.96	0.97	0.97	0.95						0.77	0.56	0.89	0.94	0.85
59	FAHFA 38:5; FAHFA 20:4/18:1; [M-H]- C38H64O4	MS2	M-H	259.243	133.81	5.14	0.36	2.97	2.88	6.81						133.8	133.8	134.3	134.3	134.3						0.94	0.96	0.97	0.97	0.95						0.59	0.14	0.59	0.61	0.75
59	FAHFA 38:5; FAHFA 20:4/18:1; [M-H]- C38H64O4	MS2	M-H	280.235	133.81	25.43	5.53	8.62	7.8	24.83						133.8	133.8	134.3	134.3	134.3						0.94	0.96	0.97	0.97	0.95						0.89	0.78	0.74	0.87	0.73
59	FAHFA 38:5; FAHFA 20:4/18:1; [M-H]- C38H64O4	MS2	M-H	205.196	133.81	0.16	0	1.61	0.28	1.2						133.8	133.8	134.3	134.3	134.3						0.94	0.96	0.97	0.97	0.95						0.99	0	0.93	0	0.77
59	FAHFA 38:5; FAHFA 20:4/18:1; [M-H]- C38H64O4	MS2	M-H	231.21	133.81	0	0	0	0	0.09						133.8	133.8	134.3	134.3	134.3						0.94	0.96	0.97	0.97	0.95						0	0	0	0	0.1
59	ISF of FAHFA 38:5; FAHFA 20:4/18:1; [M-H]- C38H64O4	MS1	-	279.233	135.14	61533.9	20216	56814.9	49776.3	41691.8						135.5	135.5	135.5	135.5	135.1						0.97	0.96	0.97	0.97	0.97						0.8	0.81	0.98	0.95	0.6
59	ISF of FAHFA 38:5; FAHFA 20:4/18:1; [M-H]- C38H64O4	MS2	-	279.233	135.14	205.79	80.62	204.93	147.29	460.51						135.5	135.5	135.5	135.5	135.1						0.97	0.96	0.97	0.97	0.97						0.99	0.99	1	0.97	0.61
59	ISF of FAHFA 38:5; FAHFA 20:4/18:1; [M-H]- C38H64O4	MS2	-	71.0125	135.14	0	0	0.48	0.57	0.81						135.5	135.5	135.5	135.5	135.1						0.97	0.96	0.97	0.97	0.97						0	0	0.98	0.95	0.41
59	ISF of FAHFA 38:5; FAHFA 20:4/18:1; [M-H]- C38H64O4	MS2	-	203.627	135.14	0	0	0	0	0						135.5	135.5	135.5	135.5	135.1						0.97	0.96	0.97	0.97	0.97						0	0	0	0	0
59	ISF of FAHFA 38:5; FAHFA 20:4/18:1; [M-H]- C38H64O4	MS2	-	181.127	135.14	0	0	0	0	0						135.5	135.5	135.5	135.5	135.1						0.97	0.96	0.97	0.97	0.97						0	0	0	0	0
59	ISF of FAHFA 38:5; FAHFA 20:4/18:1; [M-H]- C38H64O4	MS2	-	95.0488	135.14	0.44	0	0.44	0	0.44						135.5	135.5	135.5	135.5	135.1						0.97	0.96	0.97	0.97	0.97						0.8	0	0.75	0	0
59	ISF of FAHFA 38:5; FAHFA 20:4/18:1; [M-H]- C38H64O4	MS2	-	59.0138	135.14	0.52	0.09	0	0.35	1.16						135.5	135.5	135.5	135.5	135.1						0.97	0.96	0.97	0.97	0.97						0.8	0.81	0	0.91	0.6
60	FAHFA 38:4; FAHFA 18:1/20:3; [M-H]- C38H66O4	MS1	M-H	585.485	152.9	179.76	137.21	267.74	279.44	378.36						152.6	152.6	152.6	152.6	152.6						0.93	0.91	0.94	0.93	0.95						0.92	0.93	0.92	0.8	0.88
60	FAHFA 38:4; FAHFA 18:1/20:3; [M-H]- C38H66O4	MS2	M-H	281.249	152.9	101.98	51.61	91.41	128.84	95.89						152.6	152.6	152.6	152.6	152.6						0.93	0.91	0.94	0.93	0.95						0.92	0.9	0.92	0.79	0.88
60	FAHFA 38:4; FAHFA 18:1/20:3; [M-H]- C38H66O4	MS2	M-H	585.489	152.9	23.56	10.56	18.86	36.41	19.79						152.6	152.6	152.6	152.6	152.6						0.93	0.91	0.94	0.93	0.95						0.94	0.93	0.94	0.8	0.77
60	FAHFA 38:4; FAHFA 18:1/20:3; [M-H]- C38H66O4	MS2	M-H	303.233	152.9	0	0	0.2	0	0.83						152.6	152.6	152.6	152.6	152.6						0.93	0.91	0.94	0.93	0.95						0	0	0.46	0	0.06
60	FAHFA 38:4; FAHFA 18:1/20:3; [M-H]- C38H66O4	MS2	M-H	282.252	152.9	16.11	9.6	16.72	18.39	12.03						152.6	152.6	152.6	152.6	152.6						0.93	0.91	0.94	0.93	0.95						0.91	0.98	0.85	0.82	0.89
60	FAHFA 38:4; FAHFA 18:1/20:3; [M-H]- C38H66O4	MS2	M-H	126.989	152.9	0	0	0	0	0						152.6	152.6	152.6	152.6	152.6						0.93	0.91	0.94	0.93	0.95						0	0	0	0	0
60	FAHFA 38:4; FAHFA 18:1/20:3; [M-H]- C38H66O4	MS2	M-H	282.473	152.9	0	0	0	0	0						152.6	152.6	152.6	152.6	152.6						0.93	0.91	0.94	0.93	0.95						0	0	0	0	0
60	ISF of FAHFA 38:4; FAHFA 18:1/20:3; [M-H]- C38H66O4	MS1	-	281.251	153.77	45302.5		63484.4	69648.8	74161						153.8		152.6	152.6	152.6						1		1	1	1						0.86		0.84	0.96	0.98
60	ISF of FAHFA 38:4; FAHFA 18:1/20:3; [M-H]- C38H66O4	MS2	-	281.249	153.77	307.39		401.26	426.29	360.38						153.8		152.6	152.6	152.6						1		1	1	1						0.97		0.99	0.98	0.9
60	ISF of FAHFA 38:4; FAHFA 18:1/20:3; [M-H]- C38H66O4	MS2	-	280.392	153.77	0.89		0	1.7	0.47						153.8		152.6	152.6	152.6						1		1	1	1						0.41		0	0.93	0.11
60	ISF of FAHFA 38:4; FAHFA 18:1/20:3; [M-H]- C38H66O4	MS2	-	280.374	153.77	0.89		1.51	1.13	2.58						153.8		152.6	152.6	152.6						1		1	1	1						0.41		0.55	0.86	0.68
60	ISF of FAHFA 38:4; FAHFA 18:1/20:3; [M-H]- C38H66O4	MS2	-	263.236	153.77	0.55		0.36	2.1	1.54						153.8		152.6	152.6	152.6						1		1	1	1						0.41		0.84	0.96	0.98
60	ISF of FAHFA 38:4; FAHFA 18:1/20:3; [M-H]- C38H66O4	MS2	-	71.0132	153.77	0.1		0	0.43	0.38						153.8		152.6	152.6	152.6						1		1	1	1						0.86		0	0.85	0.98
61	LPC 20:5; [M+FA-H]- C28H48NO7P	MS1	M+HCOO	586.314	68.72	76.03	303.98	56.58	30.7	250.26						69.6	69.6	69.6	68.4	69.6						0.68	0.92	0.81	0.8	0.82						0.65	0.73	0.62	0.52	0.72
61	LPC 20:5; [M+FA-H]- C28H48NO7P	MS2	M+HCOO	301.217	68.72	1.46	16.98	1.76	2.64	10.37						69.6	69.6	69.6	68.4	69.6						0.68	0.92	0.81	0.8	0.82						0.65	0.9	0.64	0.91	0.87
61	LPC 20:5; [M+FA-H]- C28H48NO7P	MS2	M+HCOO	257.227	68.72	1.26	2.8	0	0	1.08						69.6	69.6	69.6	68.4	69.6						0.68	0.92	0.81	0.8	0.82						0.52	0.7	0	0	0.63
61	LPC 20:5; [M+FA-H]- C28H48NO7P	MS2	M+HCOO	242.08	68.72	0	0.79	0.7	0	1.05						69.6	69.6	69.6	68.4	69.6						0.68	0.92	0.81	0.8	0.82						0	0.73	0.62	0	0.71
61	LPC 20:5; [M+FA-H]- C28H48NO7P	MS2	M+HCOO	526.291	68.72	2.97	3.85	0	0.52	4.63						69.6	69.6	69.6	68.4	69.6						0.68	0.92	0.81	0.8	0.82						0.78	0.71	0	0.52	0.72
61	LPC 20:5; [M+FA-H]- C28H48NO7P	MS2	M+HCOO	203.181	68.72	0	0	0	0	0						69.6	69.6	69.6	68.4	69.6						0.68	0.92	0.81	0.8	0.82						0	0	0	0	0
61	LPC 20:5; [M+FA-H]- C28H48NO7P	MS2	M+HCOO	168.044	68.72	0	0	0	0	0						69.6	69.6	69.6	68.4	69.6						0.68	0.92	0.81	0.8	0.82						0	0	0	0	0
62	LPC 20:4; [M+FA-H]- C28H50NO7P	MS1	M+HCOO	588.33	87.51	2576.67	9239.87	3206.75	1511.83	8894.23	233.94	152.89	61.09	377.99	146.32	86.7	86.7	86.7	86.7	86.7	87.9	87.9	87.9	86.7	86.7	0.98	0.98	0.97	0.97	0.98	0.91	0.88	0.82	0.96	0.94	0.94	0.99	0.94	0.95	0.97	0.81	0.66	0.7	0.97	0.94
62	LPC 20:4; [M+FA-H]- C28H50NO7P	MS2	M+HCOO	303.233	87.51	287.26	1062.34	355.29	159.49	1012.47	22.89	12.12	4.69	39.56	15.62	86.7	86.7	86.7	86.7	86.7	87.9	87.9	87.9	86.7	86.7	0.98	0.98	0.97	0.97	0.98	0.91	0.88	0.82	0.96	0.94	0.94	0.99	0.93	0.95	0.97	0.91	0.87	0.7	0.95	0.94
62	LPC 20:4; [M+FA-H]- C28H50NO7P	MS2	M+HCOO	259.243	87.51	21.66	87.34	27.5	8.02	71.71	2.35	0	0.91	2.97	0.54	86.7	86.7	86.7	86.7	86.7	87.9	87.9	87.9	86.7	86.7	0.98	0.98	0.97	0.97	0.98	0.91	0.88	0.82	0.96	0.94	0.92	0.96	0.91	0.84	0.94	0.61	0	0.73	0.93	0.44
62	LPC 20:4; [M+FA-H]- C28H50NO7P	MS2	M+HCOO	528.31	87.51	77.8	279.39	101.97	47.01	258.35	8.11	4.77	0	9.25	3.73	86.7	86.7	86.7	86.7	86.7	87.9	87.9	87.9	86.7	86.7	0.98	0.98	0.97	0.97	0.98	0.91	0.88	0.82	0.96	0.94	0.94	0.96	0.94	0.95	0.95	0.81	0.66	0	0.97	0.94
62	LPC 20:4; [M+FA-H]- C28H50NO7P	MS2	M+HCOO	242.08	87.51	9.83	49.12	14.75	6.44	42.81	0	0	0	1.41	0	86.7	86.7	86.7	86.7	86.7	87.9	87.9	87.9	86.7	86.7	0.98	0.98	0.97	0.97	0.98	0.91	0.88	0.82	0.96	0.94	0.87	0.97	0.83	0.95	0.99	0	0	0	0.86	0
62	LPC 20:4; [M+FA-H]- C28H50NO7P	MS2	M+HCOO	205.196	87.51	2.97	17.16	4.33	1.13	15.51	0	0	0	0.65	0	86.7	86.7	86.7	86.7	86.7	87.9	87.9	87.9	86.7	86.7	0.98	0.98	0.97	0.97	0.98	0.91	0.88	0.82	0.96	0.94	0.94	1	0.94	0.81	0.97	0	0	0	0.97	0
62	LPC 20:4; [M+FA-H]- C28H50NO7P	MS2	M+HCOO	224.069	87.51	6.28	16.07	5.61	2.6	19.36	0	0	0	0	0	86.7	86.7	86.7	86.7	86.7	87.9	87.9	87.9	86.7	86.7	0.98	0.98	0.97	0.97	0.98	0.91	0.88	0.82	0.96	0.94	0.66	0.95	0.7	0.69	0.92	0	0	0	0	0
63	LPC 20:3; [M+FA-H]- C28H52NO7P	MS1	M+HCOO	590.346	99.05	491.63	2727.23	630.91	472.04	2076.59				82.42		98.9	98.9	98.9	98.9	98.9				100.2		0.96	0.96	0.96	0.96	0.97				0.95		0.92	0.94	0.86	0.94	0.97				0.82
63	LPC 20:3; [M+FA-H]- C28H52NO7P	MS2	M+HCOO	305.249	99.05	94.72	456.26	109.13	93.31	354.04				15.12		98.9	98.9	98.9	98.9	98.9				100.2		0.96	0.96	0.96	0.96	0.97				0.95		0.94	0.95	0.86	0.96	0.97				0.82
63	LPC 20:3; [M+FA-H]- C28H52NO7P	MS2	M+HCOO	530.325	99.05	17.81	106.34	28.87	20.43	70.98				2.6		98.9	98.9	98.9	98.9	98.9				100.2		0.96	0.96	0.96	0.96	0.97				0.95		0.92	0.93	0.9	0.94	0.93				0.85
63	LPC 20:3; [M+FA-H]- C28H52NO7P	MS2	M+HCOO	242.079	99.05	2.71	8.38	1.58	2.7	7.93				0		98.9	98.9	98.9	98.9	98.9				100.2		0.96	0.96	0.96	0.96	0.97				0.95		0.8	0.93	0.67	0.7	0.97				0
63	LPC 20:3; [M+FA-H]- C28H52NO7P	MS2	M+HCOO	168.045	99.05	0	2.25	0	0.47	2.73				0		98.9	98.9	98.9	98.9	98.9				100.2		0.96	0.96	0.96	0.96	0.97				0.95		0	0.94	0	0.27	0.84				0
63	LPC 20:3; [M+FA-H]- C28H52NO7P	MS2	M+HCOO	287.238	99.05	0	0.57	0	0	1.05				0		98.9	98.9	98.9	98.9	98.9				100.2		0.96	0.96	0.96	0.96	0.97				0.95		0	0.38	0	0	0.63				0
63	LPC 20:3; [M+FA-H]- C28H52NO7P	MS2	M+HCOO	224.069	99.05	0	3.44	0	0.8	3.36				0		98.9	98.9	98.9	98.9	98.9				100.2		0.96	0.96	0.96	0.96	0.97				0.95		0	0.9	0	0.5	0.5				0
64	9(10)-EpOME [M+H]+ C18H32O3 NIST 1138256	MS1	2M-H	591.461	168.03			22.48		71.32								167.3		168.5								0.77		0.84								0.68		0.76
64	9(10)-EpOME [M+H]+ C18H32O3 NIST 1138256	MS2	2M-H	311.223	168.03			0.8		3.77								167.3		168.5								0.77		0.84								0.8		0.76
64	9(10)-EpOME [M+H]+ C18H32O3 NIST 1138256	MS2	2M-H	279.232	168.03			1.88		5.74								167.3		168.5								0.77		0.84								0.68		0.87
64	9(10)-EpOME [M+H]+ C18H32O3 NIST 1138256	MS2	2M-H	293.21	168.03			0.77		1.35								167.3		168.5								0.77		0.84								0.4		0.47
64	9(10)-EpOME [M+H]+ C18H32O3 NIST 1138256	MS2	2M-H	255.233	168.03			15.89		21.36								167.3		168.5								0.77		0.84								0.6		0.66
64	9(10)-EpOME [M+H]+ C18H32O3 NIST 1138256	MS2	2M-H	387.219	168.03			0		0								167.3		168.5								0.77		0.84								0		0
64	9(10)-EpOME [M+H]+ C18H32O3 NIST 1138256	MS2	2M-H	139.113	168.03			0		0								167.3		168.5								0.77		0.84								0		0
65	LPC 20:2; [M+FA-H]- C28H54NO7P	MS1	M+HCOO	592.361	115.18	46.63	142.32	56.54		98.57				28.5		119.7	114.8	116		114.8				115.2		0.91	0.91	0.94		0.96				0.66		0.51	0.9	0.63		0.7				0.56
65	LPC 20:2; [M+FA-H]- C28H54NO7P	MS2	M+HCOO	307.264	115.18	6.57	34.96	8.74		17.13				5.19		119.7	114.8	116		114.8				115.2		0.91	0.91	0.94		0.96				0.66		0.82	0.95	0.87		0.87				0.92
65	LPC 20:2; [M+FA-H]- C28H54NO7P	MS2	M+HCOO	196.037	115.18	1.03	0	0		0.79				0		119.7	114.8	116		114.8				115.2		0.91	0.91	0.94		0.96				0.66		0.37	0	0		0.54				0
65	LPC 20:2; [M+FA-H]- C28H54NO7P	MS2	M+HCOO	385.203	115.18	0	0	0		0.66				0		119.7	114.8	116		114.8				115.2		0.91	0.91	0.94		0.96				0.66		0	0	0		0.33				0
65	LPC 20:2; [M+FA-H]- C28H54NO7P	MS2	M+HCOO	532.343	115.18	0.52	5.43	2.6		4.38				3.13		119.7	114.8	116		114.8				115.2		0.91	0.91	0.94		0.96				0.66		0.51	0.9	0.63		0.7				0.56
65	LPC 20:2; [M+FA-H]- C28H54NO7P	MS2	M+HCOO	546.271	115.18	0	0	0		0				0		119.7	114.8	116		114.8				115.2		0.91	0.91	0.94		0.96				0.66		0	0	0		0				0
66	FAHFA 38:0; FAHFA 18:0/20:0; [M-H]- C38H74O4	MS1	M-H	593.55	174.54		33.96	28.91		43.81							174.6	174.5		174.6							0.99	0.99		1							0.67	0.64		0.64
66	FAHFA 38:0; FAHFA 18:0/20:0; [M-H]- C38H74O4	MS2	M-H	309.279	174.54		22.23	35.64		41.74							174.6	174.5		174.6							0.99	0.99		1							0.85	0.91		0.65
66	FAHFA 38:0; FAHFA 18:0/20:0; [M-H]- C38H74O4	MS2	M-H	283.264	174.54		22	42.75		35.94							174.6	174.5		174.6							0.99	0.99		1							0.67	0.64		0.64
66	FAHFA 38:0; FAHFA 18:0/20:0; [M-H]- C38H74O4	MS2	M-H	171.162	174.54		0	0		0							174.6	174.5		174.6							0.99	0.99		1							0	0		0
67	PS 22:0; PS 4:0-18:0; [M-H]- C28H54NO10P	MS1	M-H	594.34	121.02		23.55										120.9										0.9										0.57
67	PS 22:0; PS 4:0-18:0; [M-H]- C28H54NO10P	MS2	M-H	283.264	121.02		1.61										120.9										0.9										0.57
67	PS 22:0; PS 4:0-18:0; [M-H]- C28H54NO10P	MS2	M-H	480.303	121.02		0										120.9										0.9										0
67	PS 22:0; PS 4:0-18:0; [M-H]- C28H54NO10P	MS2	M-H	87.0458	121.02		0.11										120.9										0.9										0.64
68	LPC 20:1; [M+FA-H]- C28H56NO7P	MS1	M+HCOO	594.377	136.37					49.53		15.95	22.27	44.77	36.9					136.8		136.4	136.4	136.8	136.4					0.94		0.81	0.8	0.84	0.89					0.55		0.66	0.53	0.67	0.73
68	LPC 20:1; [M+FA-H]- C28H56NO7P	MS2	M+HCOO	309.279	136.37					15.26		2.07	1.17	6.69	4.25					136.8		136.4	136.4	136.8	136.4					0.94		0.81	0.8	0.84	0.89					0.67		0.66	0.12	0.97	0.73
68	LPC 20:1; [M+FA-H]- C28H56NO7P	MS2	M+HCOO	534.357	136.37					5.18		2.6	0.78	4.39	3.13					136.8		136.4	136.4	136.8	136.4					0.94		0.81	0.8	0.84	0.89					0.48		0.94	0.53	0.67	0.6
68	LPC 20:1; [M+FA-H]- C28H56NO7P	MS2	M+HCOO	224.069	136.37					1.1		0	0	0	0.34					136.8		136.4	136.4	136.8	136.4					0.94		0.81	0.8	0.84	0.89					0.55		0	0	0	0.82
68	LPC 20:1; [M+FA-H]- C28H56NO7P	MS2	M+HCOO	196.035	136.37					0.47		0	2.21	0	0					136.8		136.4	136.4	136.8	136.4					0.94		0.81	0.8	0.84	0.89					0		0	0.51	0	0
68	LPC 20:1; [M+FA-H]- C28H56NO7P	MS2	M+HCOO	168.042	136.37					0		0	0	0	0					136.8		136.4	136.4	136.8	136.4					0.94		0.81	0.8	0.84	0.89					0		0	0	0	0
68	LPC 20:1; [M+FA-H]- C28H56NO7P	MS2	M+HCOO	152.996	136.37					3.41		0	3.63	0	0					136.8		136.4	136.4	136.8	136.4					0.94		0.81	0.8	0.84	0.89					0.13		0	0.55	0	0
69	LPC 20:0; [M+FA-H]- C28H58NO7P	MS1	M+HCOO	596.392	155.86	51.51	56.94	66.98	54.35	114.25		18.22		67.97	54.42	155.1	156.3	156.3	156.3	156.3		156.3		156.3	156.3	1	0.97	0.89	0.96	0.99		0.93		0.93	0.94	0.69	0.62	0.74	0.79	0.85		0.68		0.71	0.92
69	LPC 20:0; [M+FA-H]- C28H58NO7P	MS2	M+HCOO	311.296	155.86	12.83	11.77	11.99	10.22	20.92		2.37		7.35	4.66	155.1	156.3	156.3	156.3	156.3		156.3		156.3	156.3	1	0.97	0.89	0.96	0.99		0.93		0.93	0.94	0.89	0.68	0.89	0.83	0.89		0.8		0.93	0.92
69	LPC 20:0; [M+FA-H]- C28H58NO7P	MS2	M+HCOO	536.38	155.86	0.91	1.93	8.46	5.58	6.74		1.82		6.22	3.76	155.1	156.3	156.3	156.3	156.3		156.3		156.3	156.3	1	0.97	0.89	0.96	0.99		0.93		0.93	0.94	0.15	0.62	0.74	0.79	0.85		0.68		0.71	0.94
69	LPC 20:0; [M+FA-H]- C28H58NO7P	MS2	M+HCOO	224.069	155.86	1.18	0	0	0.17	0.5		0		0.51	1.35	155.1	156.3	156.3	156.3	156.3		156.3		156.3	156.3	1	0.97	0.89	0.96	0.99		0.93		0.93	0.94	0.69	0	0	0.68	0.62		0		0.67	0.9
70	Cer-ADS d34:1; Cer-ADS d14:0/20:1; [M-H]- C34H67NO4---Cer-AS d34:1; Cer-AS d18:1/16:0; [M-H]- C34H67NO4---Cer-NP t34:1; Cer-NP t18:1/16:0; [M-H]- C34H67NO4	MS1	M+HCOO	598.504	241.77				15.29		18.35								241.8		241.7								0.72		0.79								0.72		0.78
70	Cer-ADS d34:1; Cer-ADS d14:0/20:1; [M-H]- C34H67NO4---Cer-AS d34:1; Cer-AS d18:1/16:0; [M-H]- C34H67NO4---Cer-NP t34:1; Cer-NP t18:1/16:0; [M-H]- C34H67NO4	MS2	M+HCOO	552.5	241.77				4.73		4.51								241.8		241.7								0.72		0.79								0.77		0.93
70	Cer-ADS d34:1; Cer-ADS d14:0/20:1; [M-H]- C34H67NO4---Cer-AS d34:1; Cer-AS d18:1/16:0; [M-H]- C34H67NO4---Cer-NP t34:1; Cer-NP t18:1/16:0; [M-H]- C34H67NO4	MS2	M+HCOO	237.226	241.77				0		0								241.8		241.7								0.72		0.79								0		0
70	Cer-ADS d34:1; Cer-ADS d14:0/20:1; [M-H]- C34H67NO4---Cer-AS d34:1; Cer-AS d18:1/16:0; [M-H]- C34H67NO4---Cer-NP t34:1; Cer-NP t18:1/16:0; [M-H]- C34H67NO4	MS2	M+HCOO	296.251	241.77				0		0								241.8		241.7								0.72		0.79								0		0
70	Cer-ADS d34:1; Cer-ADS d14:0/20:1; [M-H]- C34H67NO4---Cer-AS d34:1; Cer-AS d18:1/16:0; [M-H]- C34H67NO4---Cer-NP t34:1; Cer-NP t18:1/16:0; [M-H]- C34H67NO4	MS2	M+HCOO	504.479	241.77				0		0.51								241.8		241.7								0.72		0.79								0		0.78
70	Cer-ADS d34:1; Cer-ADS d14:0/20:1; [M-H]- C34H67NO4---Cer-AS d34:1; Cer-AS d18:1/16:0; [M-H]- C34H67NO4---Cer-NP t34:1; Cer-NP t18:1/16:0; [M-H]- C34H67NO4	MS2	M+HCOO	225.222	241.77				0.68		0.51								241.8		241.7								0.72		0.79								0.72		0.7
71	LPI 18:0; [M-H]- C27H53O12P	MS1	M-H	599.322	113.69				22.6										113.6										0.9										0.81
71	LPI 18:0; [M-H]- C27H53O12P	MS2	M-H	283.263	113.69				2.35										113.6										0.9										0.53
71	LPI 18:0; [M-H]- C27H53O12P	MS2	M-H	241.017	113.69				0.53										113.6										0.9										0.81
71	LPI 18:0; [M-H]- C27H53O12P	MS2	M-H	315.047	113.69				0										113.6										0.9										0
71	LPI 18:0; [M-H]- C27H53O12P	MS2	M-H	152.996	113.69				0.35										113.6										0.9										0.81
71	LPI 18:0; [M-H]- C27H53O12P	MS2	M-H	210.958	113.69				0										113.6										0.9										0
72	PS 24:0; PS 6:0-18:0; [M-H]- C30H58NO10P	MS1	M-H2O-H	604.361	144.14				45.49	68.64									144.1	142.9									0.9	0.9									0.53	0.7
72	PS 24:0; PS 6:0-18:0; [M-H]- C30H58NO10P	MS2	M-H2O-H	283.266	144.14				14.92	22.71									144.1	142.9									0.9	0.9									0.65	0.85
72	PS 24:0; PS 6:0-18:0; [M-H]- C30H58NO10P	MS2	M-H2O-H	419.253	144.14				0	0									144.1	142.9									0.9	0.9									0	0
72	PS 24:0; PS 6:0-18:0; [M-H]- C30H58NO10P	MS2	M-H2O-H	141.054	144.14				0.6	0.94									144.1	142.9									0.9	0.9									0.53	0.7
73	8,11-Eicosadiynoic acid [M-H]- C20H32O2 NIST 1204920---8,11-Eicosadiynoic acid [M-H]- C20H32O2 NIST 1204921	MS1	2M-H	607.473	131.84	224.72	28.28	133.15	195.69	297.56						131.9	131.9	131.9	131.9	131.9						1	0.98	0.99	1	1						0.97	0.83	0.95	0.97	0.96
73	8,11-Eicosadiynoic acid [M-H]- C20H32O2 NIST 1204920---8,11-Eicosadiynoic acid [M-H]- C20H32O2 NIST 1204921	MS2	2M-H	303.233	131.84	166.5	24.02	93.24	167.21	270.32						131.9	131.9	131.9	131.9	131.9						1	0.98	0.99	1	1						0.94	0.83	0.88	0.95	0.94
73	8,11-Eicosadiynoic acid [M-H]- C20H32O2 NIST 1204920---8,11-Eicosadiynoic acid [M-H]- C20H32O2 NIST 1204921	MS2	2M-H	259.244	131.84	12.44	1.25	8.23	19.6	24.15						131.9	131.9	131.9	131.9	131.9						1	0.98	0.99	1	1						0.94	0.96	0.91	0.97	0.98
73	8,11-Eicosadiynoic acid [M-H]- C20H32O2 NIST 1204920---8,11-Eicosadiynoic acid [M-H]- C20H32O2 NIST 1204921	MS2	2M-H	205.198	131.84	2.04	0	1.16	2.2	2.8						131.9	131.9	131.9	131.9	131.9						1	0.98	0.99	1	1						0.91	0	0.83	0.99	0.91
73	8,11-Eicosadiynoic acid [M-H]- C20H32O2 NIST 1204920---8,11-Eicosadiynoic acid [M-H]- C20H32O2 NIST 1204921	MS2	2M-H	285.221	131.84	1.14	0	0.38	2.17	2.36						131.9	131.9	131.9	131.9	131.9						1	0.98	0.99	1	1						0.61	0	0.95	0.76	0.96
73	8,11-Eicosadiynoic acid [M-H]- C20H32O2 NIST 1204920---8,11-Eicosadiynoic acid [M-H]- C20H32O2 NIST 1204921	MS2	2M-H	231.213	131.84	1.03	0	0.17	0.64	1.12						131.9	131.9	131.9	131.9	131.9						1	0.98	0.99	1	1						0.97	0	0.95	0.66	0.61
73	8,11-Eicosadiynoic acid [M-H]- C20H32O2 NIST 1204920---8,11-Eicosadiynoic acid [M-H]- C20H32O2 NIST 1204921	MS2	2M-H	302.288	131.84	1.07	0	0	0.79	0.48						131.9	131.9	131.9	131.9	131.9						1	0.98	0.99	1	1						0.97	0	0	0.97	0.95
74	FAHFA 40:6; FAHFA 18:2/22:4; [M-H]- C40H66O4---FAHFA 40:6; FAHFA 22:5/18:1; [M-H]- C40H66O4	MS1	M-H	609.491	134.79	18.01				42.75						138				136.8						0.95				0.95						0.53				0.53
74	FAHFA 40:6; FAHFA 18:2/22:4; [M-H]- C40H66O4---FAHFA 40:6; FAHFA 22:5/18:1; [M-H]- C40H66O4	MS2	M-H	279.233	134.79	8.65				64.37						138				136.8						0.95				0.95						0.4				0.53
74	FAHFA 40:6; FAHFA 18:2/22:4; [M-H]- C40H66O4---FAHFA 40:6; FAHFA 22:5/18:1; [M-H]- C40H66O4	MS2	M-H	329.248	134.79	14.72				50.09						138				136.8						0.95				0.95						0.53				0.6
74	FAHFA 40:6; FAHFA 18:2/22:4; [M-H]- C40H66O4---FAHFA 40:6; FAHFA 22:5/18:1; [M-H]- C40H66O4	MS2	M-H	285.26	134.79	0.67				2.66						138				136.8						0.95				0.95						0.55				0.53
74	FAHFA 40:6; FAHFA 18:2/22:4; [M-H]- C40H66O4---FAHFA 40:6; FAHFA 22:5/18:1; [M-H]- C40H66O4	MS2	M-H	495.196	134.79	0				0						138				136.8						0.95				0.95						0				0
74	FAHFA 40:6; FAHFA 18:2/22:4; [M-H]- C40H66O4---FAHFA 40:6; FAHFA 22:5/18:1; [M-H]- C40H66O4	MS2	M-H	231.211	134.79	0				2.06						138				136.8						0.95				0.95						0				0.29
75	Cer-NS d36:1; Cer-NS d18:1/18:0; [M-H]- C36H71NO3---N-(octadecanoyl)-sphing-4-enine; [M-H]-; Cer(d18:1(4E)/18:0) C36H71NO3	MS1	M+HCOO	610.541	273.45	86.36				66.17			916.48			273.4				273.4			273.4			0.77				0.72			0.9			0.64				0.87			0.83
75	Cer-NS d36:1; Cer-NS d18:1/18:0; [M-H]- C36H71NO3---N-(octadecanoyl)-sphing-4-enine; [M-H]-; Cer(d18:1(4E)/18:0) C36H71NO3	MS2	M+HCOO	308.296	273.45	0.79				0.59			9.92			273.4				273.4			273.4			0.77				0.72			0.9			0.64				0.87			0.73
75	Cer-NS d36:1; Cer-NS d18:1/18:0; [M-H]- C36H71NO3---N-(octadecanoyl)-sphing-4-enine; [M-H]-; Cer(d18:1(4E)/18:0) C36H71NO3	MS2	M+HCOO	564.535	273.45	2.67				2.81			31.61			273.4				273.4			273.4			0.77				0.72			0.9			0.88				0.91			0.83
75	Cer-NS d36:1; Cer-NS d18:1/18:0; [M-H]- C36H71NO3---N-(octadecanoyl)-sphing-4-enine; [M-H]-; Cer(d18:1(4E)/18:0) C36H71NO3	MS2	M+HCOO	237.222	273.45	0				0			2.07			273.4				273.4			273.4			0.77				0.72			0.9			0				0			0.75
75	Cer-NS d36:1; Cer-NS d18:1/18:0; [M-H]- C36H71NO3---N-(octadecanoyl)-sphing-4-enine; [M-H]-; Cer(d18:1(4E)/18:0) C36H71NO3	MS2	M+HCOO	265.253	273.45	0				0			2.66			273.4				273.4			273.4			0.77				0.72			0.9			0				0			0.84
75	Cer-NS d36:1; Cer-NS d18:1/18:0; [M-H]- C36H71NO3---N-(octadecanoyl)-sphing-4-enine; [M-H]-; Cer(d18:1(4E)/18:0) C36H71NO3	MS2	M+HCOO	324.288	273.45	0				0			1.91			273.4				273.4			273.4			0.77				0.72			0.9			0				0			0.77
75	Cer-NS d36:1; Cer-NS d18:1/18:0; [M-H]- C36H71NO3---N-(octadecanoyl)-sphing-4-enine; [M-H]-; Cer(d18:1(4E)/18:0) C36H71NO3	MS2	M+HCOO	534.524	273.45	0				0			2.09			273.4				273.4			273.4			0.77				0.72			0.9			0				0			0.6
76	LPC 22:6; [M+FA-H]- C30H50NO7P	MS1	M+HCOO	612.33	85.05	1316.86	4377.52	1213.38	518.28	3762.86	69.72	46.42	47.15	130.97	43.09	85.5	84.3	85.5	85.5	85.5	85.5	84.3	85.5	85.5	85.5	0.98	0.95	0.95	0.93	0.92	0.81	0.9	0.88	0.76	0.75	0.95	0.96	0.94	0.96	0.97	0.76	0.7	0.73	0.73	0.57
76	LPC 22:6; [M+FA-H]- C30H50NO7P	MS2	M+HCOO	327.232	85.05	67.8	219.98	51.2	26.72	174.58	0.82	2.85	2.53	3.35	1.83	85.5	84.3	85.5	85.5	85.5	85.5	84.3	85.5	85.5	85.5	0.98	0.95	0.95	0.93	0.92	0.81	0.9	0.88	0.76	0.75	0.95	0.97	0.94	0.96	0.97	0.74	0.97	0.8	0.87	0.71
76	LPC 22:6; [M+FA-H]- C30H50NO7P	MS2	M+HCOO	283.242	85.05	28.7	88.97	24.96	7.45	62.65	1.14	0.38	0.28	0	0	85.5	84.3	85.5	85.5	85.5	85.5	84.3	85.5	85.5	85.5	0.98	0.95	0.95	0.93	0.92	0.81	0.9	0.88	0.76	0.75	0.96	0.95	0.95	0.93	0.97	0.57	0.7	0.73	0	0
76	LPC 22:6; [M+FA-H]- C30H50NO7P	MS2	M+HCOO	552.307	85.05	38.26	155.43	51.95	21.15	137.68	1.59	0	0	2.92	1.86	85.5	84.3	85.5	85.5	85.5	85.5	84.3	85.5	85.5	85.5	0.98	0.95	0.95	0.93	0.92	0.81	0.9	0.88	0.76	0.75	0.94	0.96	0.91	0.98	0.97	0.84	0	0	0.44	0.53
76	LPC 22:6; [M+FA-H]- C30H50NO7P	MS2	M+HCOO	242.082	85.05	7.66	21.26	5.23	2.36	17.38	0.18	0	0	0.7	0	85.5	84.3	85.5	85.5	85.5	85.5	84.3	85.5	85.5	85.5	0.98	0.95	0.95	0.93	0.92	0.81	0.9	0.88	0.76	0.75	0.89	0.88	0.85	0.66	0.95	0.76	0	0	0.73	0
76	LPC 22:6; [M+FA-H]- C30H50NO7P	MS2	M+HCOO	229.195	85.05	4.32	13.68	2.12	1.95	7.96	0	0	0	0	0	85.5	84.3	85.5	85.5	85.5	85.5	84.3	85.5	85.5	85.5	0.98	0.95	0.95	0.93	0.92	0.81	0.9	0.88	0.76	0.75	0.85	0.96	0.93	0.73	0.81	0	0	0	0	0
76	LPC 22:6; [M+FA-H]- C30H50NO7P	MS2	M+HCOO	152.998	85.05	3.19	5.37	2.91	1.74	8.3	0	0	0	0	0.14	85.5	84.3	85.5	85.5	85.5	85.5	84.3	85.5	85.5	85.5	0.98	0.95	0.95	0.93	0.92	0.81	0.9	0.88	0.76	0.75	0.79	0.95	0.82	0.52	0.86	0	0	0	0	0.57
77	LPC 22:5; [M+FA-H]- C30H52NO7P	MS1	M+HCOO	614.342	91.51	247.11	1074.64	240.94		726.93						91.6	91.6	92.8		91.6						0.95	0.96	0.94		0.95						0.65	0.87	0.73		0.76
77	LPC 22:5; [M+FA-H]- C30H52NO7P	MS2	M+HCOO	329.248	91.51	14.09	69.99	9.63		42.02						91.6	91.6	92.8		91.6						0.95	0.96	0.94		0.95						0.81	0.87	0.73		0.76
77	LPC 22:5; [M+FA-H]- C30H52NO7P	MS2	M+HCOO	285.258	91.51	0.86	6.35	1.43		4.75						91.6	91.6	92.8		91.6						0.95	0.96	0.94		0.95						0.64	0.64	0.52		0.46
77	LPC 22:5; [M+FA-H]- C30H52NO7P	MS2	M+HCOO	554.322	91.51	7.16	35.26	3.45		29.55						91.6	91.6	92.8		91.6						0.95	0.96	0.94		0.95						0.53	0.88	0.32		0.83
77	LPC 22:5; [M+FA-H]- C30H52NO7P	MS2	M+HCOO	242.082	91.51	8.18	27.01	6.99		18.48						91.6	91.6	92.8		91.6						0.95	0.96	0.94		0.95						0.65	0.56	0.77		0.6
77	LPC 22:5; [M+FA-H]- C30H52NO7P	MS2	M+HCOO	168.044	91.51	0	0	0		4.08						91.6	91.6	92.8		91.6						0.95	0.96	0.94		0.95						0	0	0		0.6
77	LPC 22:5; [M+FA-H]- C30H52NO7P	MS2	M+HCOO	224.066	91.51	2.43	12.79	0		8.88						91.6	91.6	92.8		91.6						0.95	0.96	0.94		0.95						0.1	0.43	0		0.4
78	LPC 22:4; [M+FA-H]- C30H54NO7P	MS1	M+HCOO	616.361	110.16		104.4	33.72	26.16	79.88					10.24		109.9	111.1	109.9	109.9					110.2		0.91	0.92	0.88	0.95					0.64		0.64	0.58	0.69	0.81					0.67
78	LPC 22:4; [M+FA-H]- C30H54NO7P	MS2	M+HCOO	331.263	110.16		13.02	4.99	2.24	8.06					0.82		109.9	111.1	109.9	109.9					110.2		0.91	0.92	0.88	0.95					0.64		0.96	0.94	0.69	0.81					0.67
78	LPC 22:4; [M+FA-H]- C30H54NO7P	MS2	M+HCOO	556.336	110.16		3.57	0	0	2.4					0		109.9	111.1	109.9	109.9					110.2		0.91	0.92	0.88	0.95					0.64		0.64	0	0	0.87					0
78	LPC 22:4; [M+FA-H]- C30H54NO7P	MS2	M+HCOO	152.997	110.16		0	1.12	0.52	3.19					2.58		109.9	111.1	109.9	109.9					110.2		0.91	0.92	0.88	0.95					0.64		0	0.24	0.19	0.31					0.67
78	LPC 22:4; [M+FA-H]- C30H54NO7P	MS2	M+HCOO	177.098	110.16		0	0	0	0					0		109.9	111.1	109.9	109.9					110.2		0.91	0.92	0.88	0.95					0.64		0	0	0	0					0
78	LPC 22:4; [M+FA-H]- C30H54NO7P	MS2	M+HCOO	242.082	110.16		0	0	0	0.53					0		109.9	111.1	109.9	109.9					110.2		0.91	0.92	0.88	0.95					0.64		0	0	0	0.47					0
78	LPC 22:4; [M+FA-H]- C30H54NO7P	MS2	M+HCOO	61.9866	110.16		0.62	1.24	0.69	0.73					1.9		109.9	111.1	109.9	109.9					110.2		0.91	0.92	0.88	0.95					0.64		0.11	0.58	0.69	0.23					0.33
79	Cer-NS d40:1; Cer-NS d18:1/22:0; [M-H]- C40H79NO3	MS1	M-H	620.597	312.28	35.46	32.7	30.51	61.63	85.37					30.97	312.5	312.5	312.5	312.5	312.5					312.5	0.81	0.88	0.75	0.92	0.9					0.78	0.77	0.76	0.67	0.71	0.89					0.65
79	Cer-NS d40:1; Cer-NS d18:1/22:0; [M-H]- C40H79NO3	MS2	M-H	364.357	312.28	3.31	2.88	0.43	4.37	4.59					1.29	312.5	312.5	312.5	312.5	312.5					312.5	0.81	0.88	0.75	0.92	0.9					0.78	0.82	0.84	0.67	0.71	0.69					0.65
79	Cer-NS d40:1; Cer-NS d18:1/22:0; [M-H]- C40H79NO3	MS2	M-H	620.598	312.28	3.38	0.84	1.96	5.15	5.02					0.56	312.5	312.5	312.5	312.5	312.5					312.5	0.81	0.88	0.75	0.92	0.9					0.78	0.77	0.76	0.75	0.37	0.89					0.65
79	Cer-NS d40:1; Cer-NS d18:1/22:0; [M-H]- C40H79NO3	MS2	M-H	590.591	312.28	0	0.82	0	1.37	3.57					0	312.5	312.5	312.5	312.5	312.5					312.5	0.81	0.88	0.75	0.92	0.9					0.78	0	0.76	0	0.93	0.9					0
79	Cer-NS d40:1; Cer-NS d18:1/22:0; [M-H]- C40H79NO3	MS2	M-H	572.574	312.28	0	0	0	0.27	0					0	312.5	312.5	312.5	312.5	312.5					312.5	0.81	0.88	0.75	0.92	0.9					0.78	0	0	0	0.71	0					0
79	Cer-NS d40:1; Cer-NS d18:1/22:0; [M-H]- C40H79NO3	MS2	M-H	321.315	312.28	0	0	0	0	0.61					0	312.5	312.5	312.5	312.5	312.5					312.5	0.81	0.88	0.75	0.92	0.9					0.78	0	0	0	0	0.72					0
79	Cer-NS d40:1; Cer-NS d18:1/22:0; [M-H]- C40H79NO3	MS2	M-H	237.22	312.28	0.17	0.17	0.17	1.03	0					0	312.5	312.5	312.5	312.5	312.5					312.5	0.81	0.88	0.75	0.92	0.9					0.78	0.58	0.76	0.57	0.71	0					0
80	13-Hydroperoxy-9Z,11E-octadecadienoic acid [M-H-H2O]- C18H32O4 NIST 1134460	MS1	2M-H	623.452	64.9			7.03	4.84	66.34								64.9	64.9	64.8								0.93	0.92	0.93								0.86	0.92	0.96
80	13-Hydroperoxy-9Z,11E-octadecadienoic acid [M-H-H2O]- C18H32O4 NIST 1134460	MS2	2M-H	311.168	64.9			7.01	24.95	23.63								64.9	64.9	64.8								0.93	0.92	0.93								0.86	0.92	0.98
80	13-Hydroperoxy-9Z,11E-octadecadienoic acid [M-H-H2O]- C18H32O4 NIST 1134460	MS2	2M-H	293.213	64.9			3.06	3.34	28.26								64.9	64.9	64.8								0.93	0.92	0.93								0.89	0.99	0.96
80	13-Hydroperoxy-9Z,11E-octadecadienoic acid [M-H-H2O]- C18H32O4 NIST 1134460	MS2	2M-H	183.015	64.9			0	0	0								64.9	64.9	64.8								0.93	0.92	0.93								0	0	0
80	13-Hydroperoxy-9Z,11E-octadecadienoic acid [M-H-H2O]- C18H32O4 NIST 1134460	MS2	2M-H	113.098	64.9			0	0	2.21								64.9	64.9	64.8								0.93	0.92	0.93								0	0	0.86
80	13-Hydroperoxy-9Z,11E-octadecadienoic acid [M-H-H2O]- C18H32O4 NIST 1134460	MS2	2M-H	223.132	64.9			0	0	0								64.9	64.9	64.8								0.93	0.92	0.93								0	0	0
80	13-Hydroperoxy-9Z,11E-octadecadienoic acid [M-H-H2O]- C18H32O4 NIST 1134460	MS2	2M-H	167.108	64.9			0	0	0.58								64.9	64.9	64.8								0.93	0.92	0.93								0	0	0.35
81	FAHFA 18:0; FAHFA 16:0/2:0; [M-H]- C18H34O4	MS1	2M-H	627.484	101.99			28.01		14.5								101.4		102.6								0.92		0.98								0.82		0.89
81	FAHFA 18:0; FAHFA 16:0/2:0; [M-H]- C18H34O4	MS2	2M-H	255.233	101.99			4.7		3.88								101.4		102.6								0.92		0.98								0.91		0.81
81	FAHFA 18:0; FAHFA 16:0/2:0; [M-H]- C18H34O4	MS2	2M-H	75.0087	101.99			1.31		0.92								101.4		102.6								0.92		0.98								0.82		0.89
81	FAHFA 18:0; FAHFA 16:0/2:0; [M-H]- C18H34O4	MS2	2M-H	75.0119	101.99			1.31		0.92								101.4		102.6								0.92		0.98								0.82		0.89
82	Cer-NS d38:2; Cer-NS d18:2/20:0; [M-H]- C38H73NO3	MS1	M+HCOO	636.556	277.96	44.69			76.86							278.3			278.3							0.89			0.87							0.63			0.66
82	Cer-NS d38:2; Cer-NS d18:2/20:0; [M-H]- C38H73NO3	MS2	M+HCOO	590.549	277.96	3.56			4.9							278.3			278.3							0.89			0.87							0.4			0.88
82	Cer-NS d38:2; Cer-NS d18:2/20:0; [M-H]- C38H73NO3	MS2	M+HCOO	336.325	277.96	0.41			1.02							278.3			278.3							0.89			0.87							0.63			0.66
82	Cer-NS d38:2; Cer-NS d18:2/20:0; [M-H]- C38H73NO3	MS2	M+HCOO	261.226	277.96	0.55			0							278.3			278.3							0.89			0.87							0.63			0
82	Cer-NS d38:2; Cer-NS d18:2/20:0; [M-H]- C38H73NO3	MS2	M+HCOO	560.549	277.96	0			0							278.3			278.3							0.89			0.87							0			0
82	Cer-NS d38:2; Cer-NS d18:2/20:0; [M-H]- C38H73NO3	MS2	M+HCOO	352.32	277.96	0			0							278.3			278.3							0.89			0.87							0			0
83	Cer-NS d38:1; Cer-NS d18:1/20:0; [M-H]- C38H75NO3	MS1	M+HCOO	638.572	293.51				532.95	419.89	60.89				157.76				293	293	294.2				293				0.86	0.87	0.64				0.83				0.95	0.79	0.5				0.74
83	Cer-NS d38:1; Cer-NS d18:1/20:0; [M-H]- C38H75NO3	MS2	M+HCOO	592.567	293.51				22.83	17.21	1.36				5.03				293	293	294.2				293				0.86	0.87	0.64				0.83				0.99	0.89	0.76				0.87
83	Cer-NS d38:1; Cer-NS d18:1/20:0; [M-H]- C38H75NO3	MS2	M+HCOO	336.327	293.51				4.82	2.98	0				0.83				293	293	294.2				293				0.86	0.87	0.64				0.83				0.95	0.55	0				0.4
83	Cer-NS d38:1; Cer-NS d18:1/20:0; [M-H]- C38H75NO3	MS2	M+HCOO	560.544	293.51				0	0.27	0				0				293	293	294.2				293				0.86	0.87	0.64				0.83				0	0.55	0				0
83	Cer-NS d38:1; Cer-NS d18:1/20:0; [M-H]- C38H75NO3	MS2	M+HCOO	293.284	293.51				0.77	0	0				0				293	293	294.2				293				0.86	0.87	0.64				0.83				0.67	0	0				0
83	Cer-NS d38:1; Cer-NS d18:1/20:0; [M-H]- C38H75NO3	MS2	M+HCOO	237.224	293.51				0	0	0				0.17				293	293	294.2				293				0.86	0.87	0.64				0.83				0	0	0				0.74
83	Cer-NS d38:1; Cer-NS d18:1/20:0; [M-H]- C38H75NO3	MS2	M+HCOO	263.238	293.51				0.91	0.55	0.18				0				293	293	294.2				293				0.86	0.87	0.64				0.83				0.75	0.79	0.5				0
84	Cer-NS d39:1; Cer-NS d17:1/22:0; [M-H]- C39H77NO3---Cer-NS d39:1; Cer-NS d18:1/21:0; [M-H]- C39H77NO3	MS1	M+HCOO	652.588	303.27				153.71	250.78				98.02					302.7	302.7				302.7					0.74	0.79				0.86					0.5	0.7				0.72
84	Cer-NS d39:1; Cer-NS d17:1/22:0; [M-H]- C39H77NO3---Cer-NS d39:1; Cer-NS d18:1/21:0; [M-H]- C39H77NO3	MS2	M+HCOO	606.585	303.27				9.21	15.04				4.67					302.7	302.7				302.7					0.74	0.79				0.86					0.66	0.9				0.87
84	Cer-NS d39:1; Cer-NS d17:1/22:0; [M-H]- C39H77NO3---Cer-NS d39:1; Cer-NS d18:1/21:0; [M-H]- C39H77NO3	MS2	M+HCOO	574.559	303.27				0	0				0.27					302.7	302.7				302.7					0.74	0.79				0.86					0	0				0.72
84	Cer-NS d39:1; Cer-NS d17:1/22:0; [M-H]- C39H77NO3---Cer-NS d39:1; Cer-NS d18:1/21:0; [M-H]- C39H77NO3	MS2	M+HCOO	576.574	303.27				0	0.27				0					302.7	302.7				302.7					0.74	0.79				0.86					0	0.38				0
84	Cer-NS d39:1; Cer-NS d17:1/22:0; [M-H]- C39H77NO3---Cer-NS d39:1; Cer-NS d18:1/21:0; [M-H]- C39H77NO3	MS2	M+HCOO	350.346	303.27				0	0				0.85					302.7	302.7				302.7					0.74	0.79				0.86					0	0				0.72
84	Cer-NS d39:1; Cer-NS d17:1/22:0; [M-H]- C39H77NO3---Cer-NS d39:1; Cer-NS d18:1/21:0; [M-H]- C39H77NO3	MS2	M+HCOO	558.572	303.27				0	0				0					302.7	302.7				302.7					0.74	0.79				0.86					0	0				0
84	Cer-NS d39:1; Cer-NS d17:1/22:0; [M-H]- C39H77NO3---Cer-NS d39:1; Cer-NS d18:1/21:0; [M-H]- C39H77NO3	MS2	M+HCOO	380.359	303.27				0.66	0.88				0					302.7	302.7				302.7					0.74	0.79				0.86					0.5	0.7				0
85	Docosahexanoic acid C22H32O2	MS1	2M-H	655.474	125.59	270.72	29.57	88.9	134.07	403.15						125.8	125.8	125.8	125.8	125.8						0.99	0.96	0.99	0.96	0.99						0.83	0.77	0.91	0.95	0.83
85	Docosahexanoic acid C22H32O2	MS2	2M-H	327.233	125.59	68.65	6.96	18.7	27.84	124.22						125.8	125.8	125.8	125.8	125.8						0.99	0.96	0.99	0.96	0.99						0.83	0.77	0.92	0.91	0.76
85	Docosahexanoic acid C22H32O2	MS2	2M-H	283.244	125.59	29.53	2.83	12.22	14.52	59.04						125.8	125.8	125.8	125.8	125.8						0.99	0.96	0.99	0.96	0.99						0.8	0.31	0.87	0.88	0.74
85	Docosahexanoic acid C22H32O2	MS2	2M-H	253.217	125.59	16.64	2.79	7.52	12.79	17.24						125.8	125.8	125.8	125.8	125.8						0.99	0.96	0.99	0.96	0.99						0.97	0.86	0.91	0.96	0.83
85	Docosahexanoic acid C22H32O2	MS2	2M-H	229.197	125.59	4.62	0.13	1.1	2.58	5.84						125.8	125.8	125.8	125.8	125.8						0.99	0.96	0.99	0.96	0.99						0.82	0.12	0.83	0.95	0.82
85	Docosahexanoic acid C22H32O2	MS2	2M-H	249.186	125.59	2.12	0	0.27	0	1.77						125.8	125.8	125.8	125.8	125.8						0.99	0.96	0.99	0.96	0.99						0.48	0	0.18	0	0.37
85	Docosahexanoic acid C22H32O2	MS2	2M-H	59.0138	125.59	0.88	0	0.13	0	1.51						125.8	125.8	125.8	125.8	125.8						0.99	0.96	0.99	0.96	0.99						0.66	0	0.18	0	0.95
86	Cer-NS d40:3; Cer-NS d18:1/22:2; [M-H]- C40H75NO3---Cer-NS d40:3; Cer-NS d18:2/22:1; [M-H]- C40H75NO3	MS1	M+HCOO	662.572	279.07				108.81	106.49									278.3	279.5									0.85	0.9									0.72	0.7
86	Cer-NS d40:3; Cer-NS d18:1/22:2; [M-H]- C40H75NO3---Cer-NS d40:3; Cer-NS d18:2/22:1; [M-H]- C40H75NO3	MS2	M+HCOO	616.566	279.07				5.28	6.66									278.3	279.5									0.85	0.9									0.81	0.73
86	Cer-NS d40:3; Cer-NS d18:1/22:2; [M-H]- C40H75NO3---Cer-NS d40:3; Cer-NS d18:2/22:1; [M-H]- C40H75NO3	MS2	M+HCOO	362.341	279.07				1.29	0.86									278.3	279.5									0.85	0.9									0.72	0.7
86	Cer-NS d40:3; Cer-NS d18:1/22:2; [M-H]- C40H75NO3---Cer-NS d40:3; Cer-NS d18:2/22:1; [M-H]- C40H75NO3	MS2	M+HCOO	319.296	279.07				0	0									278.3	279.5									0.85	0.9									0	0
86	Cer-NS d40:3; Cer-NS d18:1/22:2; [M-H]- C40H75NO3---Cer-NS d40:3; Cer-NS d18:2/22:1; [M-H]- C40H75NO3	MS2	M+HCOO	336.324	279.07				0	0.41									278.3	279.5									0.85	0.9									0	0.58
86	Cer-NS d40:3; Cer-NS d18:1/22:2; [M-H]- C40H75NO3---Cer-NS d40:3; Cer-NS d18:2/22:1; [M-H]- C40H75NO3	MS2	M+HCOO	261.222	279.07				0	0									278.3	279.5									0.85	0.9									0	0
86	Cer-NS d40:3; Cer-NS d18:1/22:2; [M-H]- C40H75NO3---Cer-NS d40:3; Cer-NS d18:2/22:1; [M-H]- C40H75NO3	MS2	M+HCOO	586.557	279.07				0	0									278.3	279.5									0.85	0.9									0	0
87	Cer-NS d40:2; Cer-NS d18:1/22:1; [M-H]- C40H77NO3---Cer-NS d40:2; Cer-NS d18:2/22:0; [M-H]- C40H77NO3	MS1	M+HCOO	664.588	295.64	678.74	506.03	683.64	1371.73	1383.79		197.98		605.79	656.82	295.4	296.6	295.4	295.4	295.4		295.4		295.4	295.4	0.92	0.83	0.9	0.98	0.93		0.87		0.97	0.91	0.67	0.67	0.76	0.78	0.8		0.67		0.79	0.68
87	Cer-NS d40:2; Cer-NS d18:1/22:1; [M-H]- C40H77NO3---Cer-NS d40:2; Cer-NS d18:2/22:0; [M-H]- C40H77NO3	MS2	M+HCOO	618.583	295.64	42.71	24.6	39.05	78.11	72.97		8.64		30.87	39.3	295.4	296.6	295.4	295.4	295.4		295.4		295.4	295.4	0.92	0.83	0.9	0.98	0.93		0.87		0.97	0.91	0.95	0.96	0.88	0.88	0.93		0.98		0.97	0.94
87	Cer-NS d40:2; Cer-NS d18:1/22:1; [M-H]- C40H77NO3---Cer-NS d40:2; Cer-NS d18:2/22:0; [M-H]- C40H77NO3	MS2	M+HCOO	362.341	295.64	6.93	4.9	6.38	16.18	6.71		0.86		5.32	4.78	295.4	296.6	295.4	295.4	295.4		295.4		295.4	295.4	0.92	0.83	0.9	0.98	0.93		0.87		0.97	0.91	0.67	0.57	0.76	0.73	0.75		0.58		0.67	0.68
87	Cer-NS d40:2; Cer-NS d18:1/22:1; [M-H]- C40H77NO3---Cer-NS d40:2; Cer-NS d18:2/22:0; [M-H]- C40H77NO3	MS2	M+HCOO	319.3	295.64	0	0	1.21	2.31	1.4		0		0.81	2.31	295.4	296.6	295.4	295.4	295.4		295.4		295.4	295.4	0.92	0.83	0.9	0.98	0.93		0.87		0.97	0.91	0	0	0.73	0.59	0.48		0		0.64	0.56
87	Cer-NS d40:2; Cer-NS d18:1/22:1; [M-H]- C40H77NO3---Cer-NS d40:2; Cer-NS d18:2/22:0; [M-H]- C40H77NO3	MS2	M+HCOO	588.571	295.64	1.1	0	0	4.65	8.97		0.27		2.19	2.19	295.4	296.6	295.4	295.4	295.4		295.4		295.4	295.4	0.92	0.83	0.9	0.98	0.93		0.87		0.97	0.91	0.48	0	0	0.51	0.8		0.67		0.79	0.6
87	Cer-NS d40:2; Cer-NS d18:1/22:1; [M-H]- C40H77NO3---Cer-NS d40:2; Cer-NS d18:2/22:0; [M-H]- C40H77NO3	MS2	M+HCOO	570.563	295.64	0	1.61	0	2.69	0		0		2.15	0	295.4	296.6	295.4	295.4	295.4		295.4		295.4	295.4	0.92	0.83	0.9	0.98	0.93		0.87		0.97	0.91	0	0.67	0	0.78	0		0		0.66	0
87	Cer-NS d40:2; Cer-NS d18:1/22:1; [M-H]- C40H77NO3---Cer-NS d40:2; Cer-NS d18:2/22:0; [M-H]- C40H77NO3	MS2	M+HCOO	336.328	295.64	1.43	0	0	0.62	3.08		0		0.93	0	295.4	296.6	295.4	295.4	295.4		295.4		295.4	295.4	0.92	0.83	0.9	0.98	0.93		0.87		0.97	0.91	0.57	0	0	0.62	0.66		0		0.64	0
88	Cer-NS d40:1; Cer-NS d18:1/22:0; [M-H]- C40H79NO3	MS1	M+HCOO	666.604	312.31	1900.01	1833.65	1715.1	3099.77	4487.93	507.8	426.79	343.58	1352.61	1716.45	312.5	312.5	312.5	312.5	312.5	312.5	312.5	312.5	312.5	312.5	0.97	0.98	0.95	0.98	0.96	0.95	0.88	0.92	0.95	0.98	0.97	0.9	0.91	0.89	0.92	0.93	0.93	0.82	0.91	0.9
88	Cer-NS d40:1; Cer-NS d18:1/22:0; [M-H]- C40H79NO3	MS2	M+HCOO	620.599	312.31	133.22	109.19	96.25	149.9	280.8	26.98	21.39	12.13	77.35	89.64	312.5	312.5	312.5	312.5	312.5	312.5	312.5	312.5	312.5	312.5	0.97	0.98	0.95	0.98	0.96	0.95	0.88	0.92	0.95	0.98	0.97	0.95	0.91	0.92	0.92	0.94	0.95	0.84	0.91	0.95
88	Cer-NS d40:1; Cer-NS d18:1/22:0; [M-H]- C40H79NO3	MS2	M+HCOO	364.359	312.31	30.79	27.39	18.78	37.6	65.64	5.47	7.03	4.37	12.5	19.39	312.5	312.5	312.5	312.5	312.5	312.5	312.5	312.5	312.5	312.5	0.97	0.98	0.95	0.98	0.96	0.95	0.88	0.92	0.95	0.98	0.9	0.9	0.9	0.89	0.87	0.86	0.93	0.82	0.91	0.9
88	Cer-NS d40:1; Cer-NS d18:1/22:0; [M-H]- C40H79NO3	MS2	M+HCOO	590.59	312.31	9.8	9.93	4.39	10.63	16.56	1.65	3.14	1.23	4.47	5.59	312.5	312.5	312.5	312.5	312.5	312.5	312.5	312.5	312.5	312.5	0.97	0.98	0.95	0.98	0.96	0.95	0.88	0.92	0.95	0.98	0.97	0.86	0.74	0.67	0.83	0.93	0.93	0.72	0.64	0.78
88	Cer-NS d40:1; Cer-NS d18:1/22:0; [M-H]- C40H79NO3	MS2	M+HCOO	572.577	312.31	4.16	3.64	1.35	5.24	6.83	0	0	0	2.97	4.43	312.5	312.5	312.5	312.5	312.5	312.5	312.5	312.5	312.5	312.5	0.97	0.98	0.95	0.98	0.96	0.95	0.88	0.92	0.95	0.98	0.88	0.77	0.65	0.84	0.94	0	0	0	0.83	0.77
88	Cer-NS d40:1; Cer-NS d18:1/22:0; [M-H]- C40H79NO3	MS2	M+HCOO	338.344	312.31	5.15	3.71	2.06	8.28	12.85	0.62	0	1.04	3.81	3.62	312.5	312.5	312.5	312.5	312.5	312.5	312.5	312.5	312.5	312.5	0.97	0.98	0.95	0.98	0.96	0.95	0.88	0.92	0.95	0.98	0.79	0.89	0.49	0.84	0.9	0.68	0	0.61	0.87	0.89
88	Cer-NS d40:1; Cer-NS d18:1/22:0; [M-H]- C40H79NO3	MS2	M+HCOO	237.222	312.31	4.69	6.89	3.45	4.91	13.24	0.7	0	0	2.16	3.44	312.5	312.5	312.5	312.5	312.5	312.5	312.5	312.5	312.5	312.5	0.97	0.98	0.95	0.98	0.96	0.95	0.88	0.92	0.95	0.98	0.96	0.86	0.99	0.83	0.92	0.6	0	0	0.61	0.82
89	Cer-NDS d40:0; Cer-NDS d18:0/22:0; [M-H]- C40H81NO3	MS1	M+HCOO	668.618	318.36	218.33	215.15	211.62	84.44	528.81	61.84	55.16	40.99	168.42	219.93	312.5	312.5	312.5	318.6	312.5	312.5	312.5	311.3	312.5	312.5	0.82	0.84	0.86	0.85	0.81	0.77	0.79	0.81	0.82	0.81	0.88	0.89	0.89	0.73	0.87	0.92	0.89	0.74	0.85	0.89
89	Cer-NDS d40:0; Cer-NDS d18:0/22:0; [M-H]- C40H81NO3	MS2	M+HCOO	622.613	318.36	10.48	11.29	8.38	5.3	22.73	0.7	1.55	0.85	3.21	6.62	312.5	312.5	312.5	318.6	312.5	312.5	312.5	311.3	312.5	312.5	0.82	0.84	0.86	0.85	0.81	0.77	0.79	0.81	0.82	0.81	0.69	0.85	0.93	0.77	0.78	0.28	0.77	0.57	0.65	0.84
89	Cer-NDS d40:0; Cer-NDS d18:0/22:0; [M-H]- C40H81NO3	MS2	M+HCOO	364.358	318.36	30.79	27.39	18.78	2.03	65.64	4.39	7.03	4.37	12.5	19.39	312.5	312.5	312.5	318.6	312.5	312.5	312.5	311.3	312.5	312.5	0.82	0.84	0.86	0.85	0.81	0.77	0.79	0.81	0.82	0.81	0.88	0.9	0.89	0.73	0.87	0.91	0.94	0.83	0.91	0.89
89	Cer-NDS d40:0; Cer-NDS d18:0/22:0; [M-H]- C40H81NO3	MS2	M+HCOO	574.588	318.36	0	0	0	0	0	0	0	0	0	0	312.5	312.5	312.5	318.6	312.5	312.5	312.5	311.3	312.5	312.5	0.82	0.84	0.86	0.85	0.81	0.77	0.79	0.81	0.82	0.81	0	0	0	0	0	0	0	0	0	0
89	Cer-NDS d40:0; Cer-NDS d18:0/22:0; [M-H]- C40H81NO3	MS2	M+HCOO	590.591	318.36	9.8	9.93	4.39	0	16.56	1.65	3.96	1.23	4.47	5.59	312.5	312.5	312.5	318.6	312.5	312.5	312.5	311.3	312.5	312.5	0.82	0.84	0.86	0.85	0.81	0.77	0.79	0.81	0.82	0.81	0.96	0.89	0.72	0	0.83	0.92	0.89	0.74	0.66	0.77
89	Cer-NDS d40:0; Cer-NDS d18:0/22:0; [M-H]- C40H81NO3	MS2	M+HCOO	324.283	318.36	0	0	0	0	0	0	0	0	0	0	312.5	312.5	312.5	318.6	312.5	312.5	312.5	311.3	312.5	312.5	0.82	0.84	0.86	0.85	0.81	0.77	0.79	0.81	0.82	0.81	0	0	0	0	0	0	0	0	0	0
89	Cer-NDS d40:0; Cer-NDS d18:0/22:0; [M-H]- C40H81NO3	MS2	M+HCOO	321.314	318.36	9.22	4.81	5.82	0	14.29	0.6	2.51	0.2	4.73	5.85	312.5	312.5	312.5	318.6	312.5	312.5	312.5	311.3	312.5	312.5	0.82	0.84	0.86	0.85	0.81	0.77	0.79	0.81	0.82	0.81	0.79	0.76	0.89	0	0.9	0.92	0.87	0.74	0.85	0.89
90	PEtOH 32:1; PEtOH 16:0-16:1; [M-H]- C37H71O8P	MS1	M-H	673.48	216.31		31.42										217.3										0.99										0.6
90	PEtOH 32:1; PEtOH 16:0-16:1; [M-H]- C37H71O8P	MS2	M-H	253.218	216.31		5.7										217.3										0.99										0.75
90	PEtOH 32:1; PEtOH 16:0-16:1; [M-H]- C37H71O8P	MS2	M-H	255.234	216.31		10.07										217.3										0.99										0.6
91	plasmenyl-PE 32:0; [M-H]-; PE(P-16:0/16:0) C37H74NO7P	MS1	M-H	674.511	258.18								55.08	16.16									257.6	258.2									0.89	0.89									0.83	0.56
91	plasmenyl-PE 32:0; [M-H]-; PE(P-16:0/16:0) C37H74NO7P	MS2	M-H	255.233	258.18								13.11	9.11									257.6	258.2									0.89	0.89									0.96	0.56
91	plasmenyl-PE 32:0; [M-H]-; PE(P-16:0/16:0) C37H74NO7P	MS2	M-H	674.513	258.18								5.52	0									257.6	258.2									0.89	0.89									0.53	0
91	plasmenyl-PE 32:0; [M-H]-; PE(P-16:0/16:0) C37H74NO7P	MS2	M-H	436.283	258.18								0.47	0.24									257.6	258.2									0.89	0.89									0.83	0.68
91	plasmenyl-PE 32:0; [M-H]-; PE(P-16:0/16:0) C37H74NO7P	MS2	M-H	227.201	258.18								0	0									257.6	258.2									0.89	0.89									0	0
91	plasmenyl-PE 32:0; [M-H]-; PE(P-16:0/16:0) C37H74NO7P	MS2	M-H	254.451	258.18								0	0									257.6	258.2									0.89	0.89									0	0
91	plasmenyl-PE 32:0; [M-H]-; PE(P-16:0/16:0) C37H74NO7P	MS2	M-H	674.532	258.18								0	0									257.6	258.2									0.89	0.89									0	0
92	Cer-NS d41:3; Cer-NS d17:1/24:2; [M-H]- C41H77NO3	MS1	M+HCOO	676.588	288.75									29.65										288.1										0.61										0.59
92	Cer-NS d41:3; Cer-NS d17:1/24:2; [M-H]- C41H77NO3	MS2	M+HCOO	630.587	288.75									1.83										288.1										0.61										0.92
92	Cer-NS d41:3; Cer-NS d17:1/24:2; [M-H]- C41H77NO3	MS2	M+HCOO	388.36	288.75									0										288.1										0.61										0
92	Cer-NS d41:3; Cer-NS d17:1/24:2; [M-H]- C41H77NO3	MS2	M+HCOO	362.345	288.75									0										288.1										0.61										0
92	Cer-NS d41:3; Cer-NS d17:1/24:2; [M-H]- C41H77NO3	MS2	M+HCOO	61.9899	288.75									6.85										288.1										0.61										0.59
93	Cer-NS d41:2; Cer-NS d17:1/24:1; [M-H]- C41H79NO3	MS1	M+HCOO	678.604	304.27	220.72		243		361.74				387.66	190.75	303.9		303.9		303.9				303.9	303.9	0.85		0.91		0.9				0.89	0.76	0.63		0.7		0.61				0.67	0.67
93	Cer-NS d41:2; Cer-NS d17:1/24:1; [M-H]- C41H79NO3	MS2	M+HCOO	632.598	304.27	9.83		14.2		19.96				27.59	12.82	303.9		303.9		303.9				303.9	303.9	0.85		0.91		0.9				0.89	0.76	0.78		0.94		0.92				0.94	0.83
93	Cer-NS d41:2; Cer-NS d17:1/24:1; [M-H]- C41H79NO3	MS2	M+HCOO	390.373	304.27	0.77		1.89		1.34				3.32	0	303.9		303.9		303.9				303.9	303.9	0.85		0.91		0.9				0.89	0.76	0.63		0.7		0.61				0.67	0
93	Cer-NS d41:2; Cer-NS d17:1/24:1; [M-H]- C41H79NO3	MS2	M+HCOO	602.59	304.27	0.55		2.5		1.8				2.07	0	303.9		303.9		303.9				303.9	303.9	0.85		0.91		0.9				0.89	0.76	0.63		0.67		0.6				0.64	0
93	Cer-NS d41:2; Cer-NS d17:1/24:1; [M-H]- C41H79NO3	MS2	M+HCOO	347.337	304.27	0		0		0				0	0	303.9		303.9		303.9				303.9	303.9	0.85		0.91		0.9				0.89	0.76	0		0		0				0	0
93	Cer-NS d41:2; Cer-NS d17:1/24:1; [M-H]- C41H79NO3	MS2	M+HCOO	584.574	304.27	0		0.82		0.82				0	0.27	303.9		303.9		303.9				303.9	303.9	0.85		0.91		0.9				0.89	0.76	0		0.68		0.26				0	0.67
93	Cer-NS d41:2; Cer-NS d17:1/24:1; [M-H]- C41H79NO3	MS2	M+HCOO	376.354	304.27	0		0		0				1.31	0	303.9		303.9		303.9				303.9	303.9	0.85		0.91		0.9				0.89	0.76	0		0		0				0.52	0
94	Cer-NS d41:1; Cer-NS d18:1/23:0; [M-H]- C41H81NO3	MS1	M+HCOO	680.619	320.57	621.82	523.46	573.47	636.07	950.93	380.24	254.23	303.33	912.47	510.48	321	321	321	321	321	321	321	321	321	321	0.91	0.91	0.91	0.88	0.95	0.95	0.83	0.88	0.86	0.93	0.91	0.85	0.89	0.88	0.93	0.67	0.68	0.66	0.94	0.84
94	Cer-NS d41:1; Cer-NS d18:1/23:0; [M-H]- C41H81NO3	MS2	M+HCOO	634.615	320.57	36.18	26.67	29.55	29.42	62.55	20.58	13.49	14.31	57.15	31.55	321	321	321	321	321	321	321	321	321	321	0.91	0.91	0.91	0.88	0.95	0.95	0.83	0.88	0.86	0.93	0.92	0.94	0.99	0.88	0.93	0.93	0.93	0.96	0.97	0.94
94	Cer-NS d41:1; Cer-NS d18:1/23:0; [M-H]- C41H81NO3	MS2	M+HCOO	378.371	320.57	8.07	6.31	5.02	4.68	12.08	3.26	2.07	1.95	5.66	6.19	321	321	321	321	321	321	321	321	321	321	0.91	0.91	0.91	0.88	0.95	0.95	0.83	0.88	0.86	0.93	0.91	0.85	0.89	0.96	0.94	0.61	0.52	0.66	0.94	0.82
94	Cer-NS d41:1; Cer-NS d18:1/23:0; [M-H]- C41H81NO3	MS2	M+HCOO	602.582	320.57	0	0.55	0	0	0.83	0.83	0	0	1.11	2.76	321	321	321	321	321	321	321	321	321	321	0.91	0.91	0.91	0.88	0.95	0.95	0.83	0.88	0.86	0.93	0	0.4	0	0	0.59	0.58	0	0	0.68	0.64
94	Cer-NS d41:1; Cer-NS d18:1/23:0; [M-H]- C41H81NO3	MS2	M+HCOO	604.601	320.57	1.94	1.94	0.83	1.67	1.67	0	0.56	0.56	0	2.77	321	321	321	321	321	321	321	321	321	321	0.91	0.91	0.91	0.88	0.95	0.95	0.83	0.88	0.86	0.93	0.85	0.61	0.88	0.29	0.59	0	0.68	0.64	0	0.84
94	Cer-NS d41:1; Cer-NS d18:1/23:0; [M-H]- C41H81NO3	MS2	M+HCOO	263.236	320.57	1.46	0	1.09	1.01	1.83	0.55	0	0	0	0.92	321	321	321	321	321	321	321	321	321	321	0.91	0.91	0.91	0.88	0.95	0.95	0.83	0.88	0.86	0.93	0.83	0	0.64	0.81	0.68	0.58	0	0	0	0.32
94	Cer-NS d41:1; Cer-NS d18:1/23:0; [M-H]- C41H81NO3	MS2	M+HCOO	237.222	320.57	0.7	0	0.35	0.7	3.44	1.22	0	0.17	2.26	0	321	321	321	321	321	321	321	321	321	321	0.91	0.91	0.91	0.88	0.95	0.95	0.83	0.88	0.86	0.93	0.38	0	0.69	0.36	0.89	0.67	0	0.64	0.84	0
95	Cer-NP t40:0; Cer-NP t18:0/22:0; [M-H]- C40H81NO4	MS1	M+HCOO	684.613	302.88	36.47		49.2		79.76				42.67	35.73	302.7		302.7		302.7				302.7	302.7	0.71		0.78		0.8				0.65	0.79	0.58		0.52		0.86				0.55	0.67
95	Cer-NP t40:0; Cer-NP t18:0/22:0; [M-H]- C40H81NO4	MS2	M+HCOO	382.369	302.88	0.66		0.22		2.08				0.66	0.22	302.7		302.7		302.7				302.7	302.7	0.71		0.78		0.8				0.65	0.79	0.58		0.42		0.67				0.55	0.43
95	Cer-NP t40:0; Cer-NP t18:0/22:0; [M-H]- C40H81NO4	MS2	M+HCOO	638.608	302.88	5.65		7.77		17.85				9.9	3.71	302.7		302.7		302.7				302.7	302.7	0.71		0.78		0.8				0.65	0.79	0.62		0.89		0.94				0.84	0.96
95	Cer-NP t40:0; Cer-NP t18:0/22:0; [M-H]- C40H81NO4	MS2	M+HCOO	339.327	302.88	0		0		0.21				0	1.87	302.7		302.7		302.7				302.7	302.7	0.71		0.78		0.8				0.65	0.79	0		0		0.59				0	0.67
95	Cer-NP t40:0; Cer-NP t18:0/22:0; [M-H]- C40H81NO4	MS2	M+HCOO	267.233	302.88	0		0.18		0				0	0	302.7		302.7		302.7				302.7	302.7	0.71		0.78		0.8				0.65	0.79	0		0.52		0				0	0
95	Cer-NP t40:0; Cer-NP t18:0/22:0; [M-H]- C40H81NO4	MS2	M+HCOO	394.368	302.88	0.22		0.45		2.57				0	0.22	302.7		302.7		302.7				302.7	302.7	0.71		0.78		0.8				0.65	0.79	0.49		0.52		0.86				0	0.43
95	Cer-NP t40:0; Cer-NP t18:0/22:0; [M-H]- C40H81NO4	MS2	M+HCOO	602.583	302.88	0		0		0				0	0	302.7		302.7		302.7				302.7	302.7	0.71		0.78		0.8				0.65	0.79	0		0		0				0	0
96	PMeOH 34:2; PMeOH 16:0-18:2; [M-H]- C38H71O8P	MS1	M-H	685.479	215.78	43.19					23.77			22.87	56.07	214.9					215.8			217.3	216.1	0.86					0.95			0.91	0.91	0.51					0.6			0.64	0.66
96	PMeOH 34:2; PMeOH 16:0-18:2; [M-H]- C38H71O8P	MS2	M-H	279.233	215.78	14.53					13.85			17.51	12.45	214.9					215.8			217.3	216.1	0.86					0.95			0.91	0.91	0.51					0.6			0.49	0.66
96	PMeOH 34:2; PMeOH 16:0-18:2; [M-H]- C38H71O8P	MS2	M-H	255.235	215.78	13.5					23.78			11.96	15.66	214.9					215.8			217.3	216.1	0.86					0.95			0.91	0.91	0.76					0.16			0.64	0.57
96	PMeOH 34:2; PMeOH 16:0-18:2; [M-H]- C38H71O8P	MS2	M-H	685.471	215.78	0					0			0	0	214.9					215.8			217.3	216.1	0.86					0.95			0.91	0.91	0					0			0	0
96	PMeOH 34:2; PMeOH 16:0-18:2; [M-H]- C38H71O8P	MS2	M-H	78.9584	215.78	0.9					0.2			0.5	0.55	214.9					215.8			217.3	216.1	0.86					0.95			0.91	0.91	0.33					0.86			0.72	0.73
97	1,2-Dipalmitoleoyl-sn-glycero-3-phosphoethanolamine [M-H]- C37H70NO8P NIST 1150482---PE 32:2; PE 16:1-16:1; [M-H]- C37H70NO8P---PE 32:2; [M-H]-; GPEtn(16:1(7Z)/16:1(7Z)) C37H70NO8P---PE 32:2; [M-H]-; GPEtn(16:1(7Z)/16:1(9Z)) C37H70NO8P---PE 32:2; [M-H]-; GPEtn(16:1(9Z)/16:1(7Z)) C37H70NO8P---PE 32:2; [M-H]-; GPEtn(16:1(9Z)/16:1(9Z)) C37H70NO8P	MS1	M-H	686.477	214.25						39.75	39.35		95.62	72.79						214.9	213.6		213.6	213.6						0.92	0.87		0.98	0.88						0.6	0.56		0.79	0.53
97	1,2-Dipalmitoleoyl-sn-glycero-3-phosphoethanolamine [M-H]- C37H70NO8P NIST 1150482---PE 32:2; PE 16:1-16:1; [M-H]- C37H70NO8P---PE 32:2; [M-H]-; GPEtn(16:1(7Z)/16:1(7Z)) C37H70NO8P---PE 32:2; [M-H]-; GPEtn(16:1(7Z)/16:1(9Z)) C37H70NO8P---PE 32:2; [M-H]-; GPEtn(16:1(9Z)/16:1(7Z)) C37H70NO8P---PE 32:2; [M-H]-; GPEtn(16:1(9Z)/16:1(9Z)) C37H70NO8P	MS2	M-H	253.219	214.25						4.54	4.9		9.87	3.13						214.9	213.6		213.6	213.6						0.92	0.87		0.98	0.88						0.79	0.81		0.79	0.74
97	1,2-Dipalmitoleoyl-sn-glycero-3-phosphoethanolamine [M-H]- C37H70NO8P NIST 1150482---PE 32:2; PE 16:1-16:1; [M-H]- C37H70NO8P---PE 32:2; [M-H]-; GPEtn(16:1(7Z)/16:1(7Z)) C37H70NO8P---PE 32:2; [M-H]-; GPEtn(16:1(7Z)/16:1(9Z)) C37H70NO8P---PE 32:2; [M-H]-; GPEtn(16:1(9Z)/16:1(7Z)) C37H70NO8P---PE 32:2; [M-H]-; GPEtn(16:1(9Z)/16:1(9Z)) C37H70NO8P	MS2	M-H	279.232	214.25						10.7	4.11		16.86	8.98						214.9	213.6		213.6	213.6						0.92	0.87		0.98	0.88						0.31	0.56		0.6	0.53
97	1,2-Dipalmitoleoyl-sn-glycero-3-phosphoethanolamine [M-H]- C37H70NO8P NIST 1150482---PE 32:2; PE 16:1-16:1; [M-H]- C37H70NO8P---PE 32:2; [M-H]-; GPEtn(16:1(7Z)/16:1(7Z)) C37H70NO8P---PE 32:2; [M-H]-; GPEtn(16:1(7Z)/16:1(9Z)) C37H70NO8P---PE 32:2; [M-H]-; GPEtn(16:1(9Z)/16:1(7Z)) C37H70NO8P---PE 32:2; [M-H]-; GPEtn(16:1(9Z)/16:1(9Z)) C37H70NO8P	MS2	M-H	227.202	214.25						0.25	0		1.87	0.17						214.9	213.6		213.6	213.6						0.92	0.87		0.98	0.88						0.6	0		0.84	0.5
97	1,2-Dipalmitoleoyl-sn-glycero-3-phosphoethanolamine [M-H]- C37H70NO8P NIST 1150482---PE 32:2; PE 16:1-16:1; [M-H]- C37H70NO8P---PE 32:2; [M-H]-; GPEtn(16:1(7Z)/16:1(7Z)) C37H70NO8P---PE 32:2; [M-H]-; GPEtn(16:1(7Z)/16:1(9Z)) C37H70NO8P---PE 32:2; [M-H]-; GPEtn(16:1(9Z)/16:1(7Z)) C37H70NO8P---PE 32:2; [M-H]-; GPEtn(16:1(9Z)/16:1(9Z)) C37H70NO8P	MS2	M-H	450.27	214.25						0	0		0.72	0						214.9	213.6		213.6	213.6						0.92	0.87		0.98	0.88						0	0		0.55	0
97	1,2-Dipalmitoleoyl-sn-glycero-3-phosphoethanolamine [M-H]- C37H70NO8P NIST 1150482---PE 32:2; PE 16:1-16:1; [M-H]- C37H70NO8P---PE 32:2; [M-H]-; GPEtn(16:1(7Z)/16:1(7Z)) C37H70NO8P---PE 32:2; [M-H]-; GPEtn(16:1(7Z)/16:1(9Z)) C37H70NO8P---PE 32:2; [M-H]-; GPEtn(16:1(9Z)/16:1(7Z)) C37H70NO8P---PE 32:2; [M-H]-; GPEtn(16:1(9Z)/16:1(9Z)) C37H70NO8P	MS2	M-H	140.012	214.25						0	0		0	0						214.9	213.6		213.6	213.6						0.92	0.87		0.98	0.88						0	0		0	0
98	PE 32:1; PE 16:0-16:1; [M-H]- C37H72NO8P---PE 32:1; [M-H]-; GPEtn(16:0/16:1(7Z)) C37H72NO8P---PE 32:1; [M-H]-; GPEtn(16:0/16:1(9Z)) C37H72NO8P---PE 32:1; [M-H]-; GPEtn(16:1(7Z)/16:0) C37H72NO8P---PE 32:1; [M-H]-; GPEtn(16:1(9Z)/16:0) C37H72NO8P	MS1	M-H	688.492	230.07	145.58	219.88	139.78	195.52	177.14	136.7	197.6	63.91	250.61	157.44	229.5	230.7	230.7	230.7	230.7	229.5	229.5	229.5	230.7	229.5	0.89	0.93	0.97	0.9	0.91	0.95	0.93	0.9	0.93	0.94	0.86	0.91	0.92	0.94	0.8	0.92	0.84	0.91	0.88	0.92
98	PE 32:1; PE 16:0-16:1; [M-H]- C37H72NO8P---PE 32:1; [M-H]-; GPEtn(16:0/16:1(7Z)) C37H72NO8P---PE 32:1; [M-H]-; GPEtn(16:0/16:1(9Z)) C37H72NO8P---PE 32:1; [M-H]-; GPEtn(16:1(7Z)/16:0) C37H72NO8P---PE 32:1; [M-H]-; GPEtn(16:1(9Z)/16:0) C37H72NO8P	MS2	M-H	253.217	230.07	17.93	28.81	21.33	27.11	24.77	19.94	28.1	8.19	31.71	24.99	229.5	230.7	230.7	230.7	230.7	229.5	229.5	229.5	230.7	229.5	0.89	0.93	0.97	0.9	0.91	0.95	0.93	0.9	0.93	0.94	0.88	0.91	0.89	0.94	0.93	0.92	0.84	0.91	0.92	0.96
98	PE 32:1; PE 16:0-16:1; [M-H]- C37H72NO8P---PE 32:1; [M-H]-; GPEtn(16:0/16:1(7Z)) C37H72NO8P---PE 32:1; [M-H]-; GPEtn(16:0/16:1(9Z)) C37H72NO8P---PE 32:1; [M-H]-; GPEtn(16:1(7Z)/16:0) C37H72NO8P---PE 32:1; [M-H]-; GPEtn(16:1(9Z)/16:0) C37H72NO8P	MS2	M-H	255.232	230.07	13.08	21.41	15.53	16.08	14.28	13.37	14.55	6.61	20.5	14.71	229.5	230.7	230.7	230.7	230.7	229.5	229.5	229.5	230.7	229.5	0.89	0.93	0.97	0.9	0.91	0.95	0.93	0.9	0.93	0.94	0.77	0.75	0.92	0.92	0.8	0.89	0.79	0.91	0.88	0.87
98	PE 32:1; PE 16:0-16:1; [M-H]- C37H72NO8P---PE 32:1; [M-H]-; GPEtn(16:0/16:1(7Z)) C37H72NO8P---PE 32:1; [M-H]-; GPEtn(16:0/16:1(9Z)) C37H72NO8P---PE 32:1; [M-H]-; GPEtn(16:1(7Z)/16:0) C37H72NO8P---PE 32:1; [M-H]-; GPEtn(16:1(9Z)/16:0) C37H72NO8P	MS2	M-H	688.493	230.07	17.45	13.93	9.26	16.56	13.72	8.04	15.42	7.1	16.43	11.14	229.5	230.7	230.7	230.7	230.7	229.5	229.5	229.5	230.7	229.5	0.89	0.93	0.97	0.9	0.91	0.95	0.93	0.9	0.93	0.94	0.86	0.94	0.91	0.95	0.8	0.92	0.78	0.86	0.85	0.92
98	PE 32:1; PE 16:0-16:1; [M-H]- C37H72NO8P---PE 32:1; [M-H]-; GPEtn(16:0/16:1(7Z)) C37H72NO8P---PE 32:1; [M-H]-; GPEtn(16:0/16:1(9Z)) C37H72NO8P---PE 32:1; [M-H]-; GPEtn(16:1(7Z)/16:0) C37H72NO8P---PE 32:1; [M-H]-; GPEtn(16:1(9Z)/16:0) C37H72NO8P	MS2	M-H	196.04	230.07	0	0	0.47	0.39	0	0	0	0	0	0.32	229.5	230.7	230.7	230.7	230.7	229.5	229.5	229.5	230.7	229.5	0.89	0.93	0.97	0.9	0.91	0.95	0.93	0.9	0.93	0.94	0	0	0.58	0.67	0	0	0	0	0	0.63
98	PE 32:1; PE 16:0-16:1; [M-H]- C37H72NO8P---PE 32:1; [M-H]-; GPEtn(16:0/16:1(7Z)) C37H72NO8P---PE 32:1; [M-H]-; GPEtn(16:0/16:1(9Z)) C37H72NO8P---PE 32:1; [M-H]-; GPEtn(16:1(7Z)/16:0) C37H72NO8P---PE 32:1; [M-H]-; GPEtn(16:1(9Z)/16:0) C37H72NO8P	MS2	M-H	432.251	230.07	0	0	0	0	0	0	0	0	0.7	0	229.5	230.7	230.7	230.7	230.7	229.5	229.5	229.5	230.7	229.5	0.89	0.93	0.97	0.9	0.91	0.95	0.93	0.9	0.93	0.94	0	0	0	0	0	0	0	0	0.53	0
98	PE 32:1; PE 16:0-16:1; [M-H]- C37H72NO8P---PE 32:1; [M-H]-; GPEtn(16:0/16:1(7Z)) C37H72NO8P---PE 32:1; [M-H]-; GPEtn(16:0/16:1(9Z)) C37H72NO8P---PE 32:1; [M-H]-; GPEtn(16:1(7Z)/16:0) C37H72NO8P---PE 32:1; [M-H]-; GPEtn(16:1(9Z)/16:0) C37H72NO8P	MS2	M-H	281.247	230.07	0.47	11.2	1.7	5.07	3.78	1.14	1.98	0	2.46	3.96	229.5	230.7	230.7	230.7	230.7	229.5	229.5	229.5	230.7	229.5	0.89	0.93	0.97	0.9	0.91	0.95	0.93	0.9	0.93	0.94	0.29	0.11	0.97	0.61	0.55	0.83	0.84	0	0.52	0.62
99	PE 32:0; PE 16:0-16:0; [M-H]- C37H74NO8P---PE 32:0; [M-H]-; GPEtn(16:0/16:0) C37H74NO8P	MS1	M-H	690.507	246.95	58.82	45.29	40.57	50.79	43.64		35.54	59.56	75.01	50.6	246.6	246.6	246.6	246.6	246.6		246.6	246.6	246.6	246.6	0.91	0.92	0.92	0.96	0.91		0.93	0.96	0.95	0.97	0.83	0.6	0.54	0.83	0.78		0.59	0.82	0.67	0.86
99	PE 32:0; PE 16:0-16:0; [M-H]- C37H74NO8P---PE 32:0; [M-H]-; GPEtn(16:0/16:0) C37H74NO8P	MS2	M-H	255.233	246.95	9.42	10.87	11.09	15.45	12.4		9.64	27.57	18.92	13.17	246.6	246.6	246.6	246.6	246.6		246.6	246.6	246.6	246.6	0.91	0.92	0.92	0.96	0.91		0.93	0.96	0.95	0.97	0.83	0.99	0.85	0.91	0.95		0.94	0.82	0.67	0.95
99	PE 32:0; PE 16:0-16:0; [M-H]- C37H74NO8P---PE 32:0; [M-H]-; GPEtn(16:0/16:0) C37H74NO8P	MS2	M-H	690.513	246.95	4.26	2.05	2.05	2.2	5.64		1.91	8.54	9.39	2.95	246.6	246.6	246.6	246.6	246.6		246.6	246.6	246.6	246.6	0.91	0.92	0.92	0.96	0.91		0.93	0.96	0.95	0.97	0.92	0.6	0.54	0.83	0.78		0.59	0.93	0.78	0.86
99	PE 32:0; PE 16:0-16:0; [M-H]- C37H74NO8P---PE 32:0; [M-H]-; GPEtn(16:0/16:0) C37H74NO8P	MS2	M-H	452.288	246.95	0	0	0	0	0		0	0	0	0.24	246.6	246.6	246.6	246.6	246.6		246.6	246.6	246.6	246.6	0.91	0.92	0.92	0.96	0.91		0.93	0.96	0.95	0.97	0	0	0	0	0		0	0	0	0.58
99	PE 32:0; PE 16:0-16:0; [M-H]- C37H74NO8P---PE 32:0; [M-H]-; GPEtn(16:0/16:0) C37H74NO8P	MS2	M-H	227.201	246.95	0.68	0	0	0.17	0.17		0	0.25	0	0	246.6	246.6	246.6	246.6	246.6		246.6	246.6	246.6	246.6	0.91	0.92	0.92	0.96	0.91		0.93	0.96	0.95	0.97	0.39	0	0	0.69	0.72		0	0.73	0	0
100	Cer-NS d42:3; Cer-NS d18:2/24:1; [M-H]- C42H79NO3	MS1	M+HCOO	690.604	297.98	547.8	425.98	587.89	622.09	852.74	357.21	277.61	148.97	955.74	467.49	297.8	297.8	297.8	297.8	297.8	297.8	297.8	297.8	297.8	297.8	0.94	0.95	0.99	0.95	0.97	0.97	0.92	0.87	0.95	0.98	0.78	0.83	0.89	0.97	0.94	0.88	0.78	0.81	0.95	0.96
100	Cer-NS d42:3; Cer-NS d18:2/24:1; [M-H]- C42H79NO3	MS2	M+HCOO	644.598	297.98	41.41	27.99	31.11	35.1	60.33	27.69	20.13	12.21	55.98	32.54	297.8	297.8	297.8	297.8	297.8	297.8	297.8	297.8	297.8	297.8	0.94	0.95	0.99	0.95	0.97	0.97	0.92	0.87	0.95	0.98	0.97	0.84	0.89	0.97	0.96	0.88	0.9	0.95	0.95	0.96
100	Cer-NS d42:3; Cer-NS d18:2/24:1; [M-H]- C42H79NO3	MS2	M+HCOO	390.373	297.98	5.99	3.88	5.63	5.76	8.96	3	2.43	0.45	10.05	6.84	297.8	297.8	297.8	297.8	297.8	297.8	297.8	297.8	297.8	297.8	0.94	0.95	0.99	0.95	0.97	0.97	0.92	0.87	0.95	0.98	0.78	0.83	0.89	0.99	0.94	0.78	0.78	0.47	0.97	0.98
100	Cer-NS d42:3; Cer-NS d18:2/24:1; [M-H]- C42H79NO3	MS2	M+HCOO	388.359	297.98	3.75	3.18	2.89	0.77	3.11	2.54	0.45	1.11	5.18	2.21	297.8	297.8	297.8	297.8	297.8	297.8	297.8	297.8	297.8	297.8	0.94	0.95	0.99	0.95	0.97	0.97	0.92	0.87	0.95	0.98	0.41	0.83	0.74	0.61	0.92	0.95	0.69	0.81	0.68	0.9
100	Cer-NS d42:3; Cer-NS d18:2/24:1; [M-H]- C42H79NO3	MS2	M+HCOO	614.586	297.98	0	3.89	2.08	4.59	4.85	1.96	1.68	0	1.4	2.65	297.8	297.8	297.8	297.8	297.8	297.8	297.8	297.8	297.8	297.8	0.94	0.95	0.99	0.95	0.97	0.97	0.92	0.87	0.95	0.98	0	0.68	0.48	0.88	0.65	0.83	0.69	0	0.52	0.94
100	Cer-NS d42:3; Cer-NS d18:2/24:1; [M-H]- C42H79NO3	MS2	M+HCOO	612.571	297.98	0.7	0	0.84	0	1.96	2.52	0	0	5.01	0.28	297.8	297.8	297.8	297.8	297.8	297.8	297.8	297.8	297.8	297.8	0.94	0.95	0.99	0.95	0.97	0.97	0.92	0.87	0.95	0.98	0.43	0	0.61	0	0.9	0.68	0	0	0.92	0.46
100	Cer-NS d42:3; Cer-NS d18:2/24:1; [M-H]- C42H79NO3	MS2	M+HCOO	347.331	297.98	1.05	0.84	0.63	1.47	1.46	0.63	0	0	0	1.26	297.8	297.8	297.8	297.8	297.8	297.8	297.8	297.8	297.8	297.8	0.94	0.95	0.99	0.95	0.97	0.97	0.92	0.87	0.95	0.98	0.56	0.51	0.57	0.97	0.72	0.69	0	0	0	0.86
101	Cer-NDS d42:2; Cer-NDS d18:0/24:2; [M-H]- C42H81NO3---Cer-NS d42:2; Cer-NS d18:1/24:1; [M-H]- C42H81NO3	MS1	M+HCOO	692.62	312.31	2417.01	2388.19	2876.12	3175.31	4216.77	1584.22	1291.01	756.68	4306.17	2491.51	312.5	312.5	312.5	312.5	312.5	312.5	312.5	312.5	312.5	312.5	0.98	0.98	0.99	0.98	0.97	0.99	0.98	0.99	0.99	0.98	0.95	0.89	0.93	0.96	0.96	0.93	0.92	0.88	0.94	0.89
101	Cer-NDS d42:2; Cer-NDS d18:0/24:2; [M-H]- C42H81NO3---Cer-NS d42:2; Cer-NS d18:1/24:1; [M-H]- C42H81NO3	MS2	M+HCOO	646.616	312.31	191.57	199.01	184.38	205.54	299.38	112.97	119.72	50.81	325.8	182.45	312.5	312.5	312.5	312.5	312.5	312.5	312.5	312.5	312.5	312.5	0.98	0.98	0.99	0.98	0.97	0.99	0.98	0.99	0.99	0.98	0.95	0.93	0.94	0.93	0.92	0.93	0.95	0.88	0.93	0.89
101	Cer-NDS d42:2; Cer-NDS d18:0/24:2; [M-H]- C42H81NO3---Cer-NS d42:2; Cer-NS d18:1/24:1; [M-H]- C42H81NO3	MS2	M+HCOO	390.374	312.31	32.51	40.09	38.67	36.58	45.88	21.45	20.35	10.28	60.09	32.1	312.5	312.5	312.5	312.5	312.5	312.5	312.5	312.5	312.5	312.5	0.98	0.98	0.99	0.98	0.97	0.99	0.98	0.99	0.99	0.98	0.84	0.89	0.9	0.91	0.88	0.92	0.9	0.75	0.86	0.94
101	Cer-NDS d42:2; Cer-NDS d18:0/24:2; [M-H]- C42H81NO3---Cer-NS d42:2; Cer-NS d18:1/24:1; [M-H]- C42H81NO3	MS2	M+HCOO	616.601	312.31	11.67	11.95	13.05	9.37	18.73	7.23	3.76	4.6	22.37	15.56	312.5	312.5	312.5	312.5	312.5	312.5	312.5	312.5	312.5	312.5	0.98	0.98	0.99	0.98	0.97	0.99	0.98	0.99	0.99	0.98	0.92	0.89	0.79	0.82	0.82	0.72	0.87	0.69	0.96	0.89
101	Cer-NDS d42:2; Cer-NDS d18:0/24:2; [M-H]- C42H81NO3---Cer-NS d42:2; Cer-NS d18:1/24:1; [M-H]- C42H81NO3	MS2	M+HCOO	347.332	312.31	7.61	8.88	7.92	7.87	13.38	3.96	4.07	2.11	12.96	9.32	312.5	312.5	312.5	312.5	312.5	312.5	312.5	312.5	312.5	312.5	0.98	0.98	0.99	0.98	0.97	0.99	0.98	0.99	0.99	0.98	0.87	0.75	0.88	0.96	0.96	0.77	0.79	0.94	0.86	0.82
101	Cer-NDS d42:2; Cer-NDS d18:0/24:2; [M-H]- C42H81NO3---Cer-NS d42:2; Cer-NS d18:1/24:1; [M-H]- C42H81NO3	MS2	M+HCOO	614.589	312.31	5.55	8.76	9.16	7.5	10.39	2.37	1.53	0.84	10.93	5.71	312.5	312.5	312.5	312.5	312.5	312.5	312.5	312.5	312.5	312.5	0.98	0.98	0.99	0.98	0.97	0.99	0.98	0.99	0.99	0.98	0.8	0.85	0.93	0.98	0.96	0.87	0.92	0.6	0.94	0.77
101	Cer-NDS d42:2; Cer-NDS d18:0/24:2; [M-H]- C42H81NO3---Cer-NS d42:2; Cer-NS d18:1/24:1; [M-H]- C42H81NO3	MS2	M+HCOO	237.223	312.31	6.52	8.19	7.24	9.47	9.04	3.88	5.44	1.3	11.5	5.52	312.5	312.5	312.5	312.5	312.5	312.5	312.5	312.5	312.5	312.5	0.98	0.98	0.99	0.98	0.97	0.99	0.98	0.99	0.99	0.98	0.96	0.86	0.9	0.88	0.88	0.93	0.83	0.87	0.87	0.67
102	PMeOH 36:3; PMeOH 18:1-18:2; [M-H]- C40H73O8P	MS1	M-H2O-H	693.494	200.59			142.34		690.21					48.36			200.2		201.4					201.4			0.8		0.93					0.57			0.52		0.72					0.57
102	PMeOH 36:3; PMeOH 18:1-18:2; [M-H]- C40H73O8P	MS2	M-H2O-H	279.233	200.59			1.13		6.3					0			200.2		201.4					201.4			0.8		0.93					0.57			0.52		0.83					0
102	PMeOH 36:3; PMeOH 18:1-18:2; [M-H]- C40H73O8P	MS2	M-H2O-H	283.264	200.59			8.64		7.27					3.99			200.2		201.4					201.4			0.8		0.93					0.57			0.64		0.47					0.57
102	PMeOH 36:3; PMeOH 18:1-18:2; [M-H]- C40H73O8P	MS2	M-H2O-H	293.214	200.59			0		2.13					0			200.2		201.4					201.4			0.8		0.93					0.57			0		0.72					0
102	PMeOH 36:3; PMeOH 18:1-18:2; [M-H]- C40H73O8P	MS2	M-H2O-H	281.248	200.59			1.61		2.93					2.08			200.2		201.4					201.4			0.8		0.93					0.57			0.37		0.32					0.62
102	PMeOH 36:3; PMeOH 18:1-18:2; [M-H]- C40H73O8P	MS2	M-H2O-H	309.279	200.59			0		0					0			200.2		201.4					201.4			0.8		0.93					0.57			0		0					0
102	PMeOH 36:3; PMeOH 18:1-18:2; [M-H]- C40H73O8P	MS2	M-H2O-H	249.224	200.59			0		0					0			200.2		201.4					201.4			0.8		0.93					0.57			0		0					0
103	Cer-NDS d42:1; Cer-NDS d18:0/24:1; [M-H]- C42H83NO3---Cer-NS d42:1; Cer-NS d18:1/24:0; [M-H]- C42H83NO3	MS1	M+HCOO	694.636	329.28	1605.59	1695.41	1488.59	1761.75	3134.45	1131.03	699.75	444.07	4162.59	1405.33	329.6	329.6	329.6	329.6	329.6	329.6	329.6	329.6	329.6	329.6	0.94	0.98	0.94	0.94	0.94	0.93	0.86	0.88	0.95	0.91	0.91	0.9	0.92	0.94	0.91	0.94	0.88	0.88	0.95	0.96
103	Cer-NDS d42:1; Cer-NDS d18:0/24:1; [M-H]- C42H83NO3---Cer-NS d42:1; Cer-NS d18:1/24:0; [M-H]- C42H83NO3	MS2	M+HCOO	648.631	329.28	108.34	111.67	98.94	128.3	245.1	73.3	41.7	25.93	287.29	96.25	329.6	329.6	329.6	329.6	329.6	329.6	329.6	329.6	329.6	329.6	0.94	0.98	0.94	0.94	0.94	0.93	0.86	0.88	0.95	0.91	0.9	0.91	0.92	0.96	0.91	0.94	0.95	0.96	0.95	0.96
103	Cer-NDS d42:1; Cer-NDS d18:0/24:1; [M-H]- C42H83NO3---Cer-NS d42:1; Cer-NS d18:1/24:0; [M-H]- C42H83NO3	MS2	M+HCOO	392.39	329.28	16.54	19.72	19.67	24.29	48.83	12.62	5.79	1.67	55.88	14.79	329.6	329.6	329.6	329.6	329.6	329.6	329.6	329.6	329.6	329.6	0.94	0.98	0.94	0.94	0.94	0.93	0.86	0.88	0.95	0.91	0.91	0.9	0.88	0.94	0.81	0.95	0.88	0.88	0.96	0.92
103	Cer-NDS d42:1; Cer-NDS d18:0/24:1; [M-H]- C42H83NO3---Cer-NS d42:1; Cer-NS d18:1/24:0; [M-H]- C42H83NO3	MS2	M+HCOO	618.625	329.28	7.24	6.28	8.34	5.28	15.65	3.23	3.06	3.34	17.12	8.49	329.6	329.6	329.6	329.6	329.6	329.6	329.6	329.6	329.6	329.6	0.94	0.98	0.94	0.94	0.94	0.93	0.86	0.88	0.95	0.91	0.91	0.84	0.9	0.92	0.8	0.93	0.72	0.74	0.95	0.9
103	Cer-NDS d42:1; Cer-NDS d18:0/24:1; [M-H]- C42H83NO3---Cer-NS d42:1; Cer-NS d18:1/24:0; [M-H]- C42H83NO3	MS2	M+HCOO	600.609	329.28	2.6	5.26	2.76	1.11	4.53	0	0	0.83	4.66	0	329.6	329.6	329.6	329.6	329.6	329.6	329.6	329.6	329.6	329.6	0.94	0.98	0.94	0.94	0.94	0.93	0.86	0.88	0.95	0.91	0.62	0.72	0.93	0.51	0.9	0	0	0.7	0.76	0
103	Cer-NDS d42:1; Cer-NDS d18:0/24:1; [M-H]- C42H83NO3---Cer-NS d42:1; Cer-NS d18:1/24:0; [M-H]- C42H83NO3	MS2	M+HCOO	616.606	329.28	1.82	3.62	3.92	2.8	6.39	2.38	0	0.84	9.87	3.62	329.6	329.6	329.6	329.6	329.6	329.6	329.6	329.6	329.6	329.6	0.94	0.98	0.94	0.94	0.94	0.93	0.86	0.88	0.95	0.91	0.55	0.85	0.76	0.61	0.93	0.91	0	0.58	0.95	0.96
103	Cer-NDS d42:1; Cer-NDS d18:0/24:1; [M-H]- C42H83NO3---Cer-NS d42:1; Cer-NS d18:1/24:0; [M-H]- C42H83NO3	MS2	M+HCOO	349.347	329.28	6.68	5	6.69	7.31	9.52	5.23	1.06	0	12.99	1.58	329.6	329.6	329.6	329.6	329.6	329.6	329.6	329.6	329.6	329.6	0.94	0.98	0.94	0.94	0.94	0.93	0.86	0.88	0.95	0.91	0.77	0.84	0.79	0.75	0.86	0.91	0.7	0	0.91	0.89
104	Cer-NDS d42:0; Cer-NDS d14:0/28:0; [M-H]- C42H85NO3---Cer-NDS d42:0; Cer-NDS d18:0/24:0; [M-H]- C42H85NO3	MS1	M+HCOO	696.644	329.81	217.46	205.58	198.57	236.16	388.28	150.71	113.52	73.69	547.17	177.5	329.6	329.6	329.6	329.6	329.6	329.6	329.6	329.6	329.6	329.6	0.89	0.83	0.86	0.81	0.84	0.75	0.91	0.94	0.82	0.86	0.81	0.91	0.87	0.83	0.81	0.93	0.85	0.78	0.91	0.87
104	Cer-NDS d42:0; Cer-NDS d14:0/28:0; [M-H]- C42H85NO3---Cer-NDS d42:0; Cer-NDS d18:0/24:0; [M-H]- C42H85NO3	MS2	M+HCOO	618.613	329.81	7.23	5.01	8.34	3.47	9.52	3.23	3.2	3.34	10.88	7.79	329.6	329.6	329.6	329.6	329.6	329.6	329.6	329.6	329.6	329.6	0.89	0.83	0.86	0.81	0.84	0.75	0.91	0.94	0.82	0.86	0.76	0.79	0.9	0.72	0.78	0.93	0.7	0.78	0.67	0.87
104	Cer-NDS d42:0; Cer-NDS d14:0/28:0; [M-H]- C42H85NO3---Cer-NDS d42:0; Cer-NDS d18:0/24:0; [M-H]- C42H85NO3	MS2	M+HCOO	650.642	329.81	16.83	16.96	9.68	11.9	23.45	2.86	8.43	3.45	39.7	16.63	329.6	329.6	329.6	329.6	329.6	329.6	329.6	329.6	329.6	329.6	0.89	0.83	0.86	0.81	0.84	0.75	0.91	0.94	0.82	0.86	0.81	0.96	0.86	0.83	0.95	0.59	0.88	0.71	0.91	0.84
104	Cer-NDS d42:0; Cer-NDS d14:0/28:0; [M-H]- C42H85NO3---Cer-NDS d42:0; Cer-NDS d18:0/24:0; [M-H]- C42H85NO3	MS2	M+HCOO	116.929	329.81	0	0	0	0	0	0	0	0	0	0	329.6	329.6	329.6	329.6	329.6	329.6	329.6	329.6	329.6	329.6	0.89	0.83	0.86	0.81	0.84	0.75	0.91	0.94	0.82	0.86	0	0	0	0	0	0	0	0	0	0
104	Cer-NDS d42:0; Cer-NDS d14:0/28:0; [M-H]- C42H85NO3---Cer-NDS d42:0; Cer-NDS d18:0/24:0; [M-H]- C42H85NO3	MS2	M+HCOO	392.386	329.81	16.54	19.05	19.67	24.29	48.83	12.62	6.23	1.67	55.88	14.79	329.6	329.6	329.6	329.6	329.6	329.6	329.6	329.6	329.6	329.6	0.89	0.83	0.86	0.81	0.84	0.75	0.91	0.94	0.82	0.86	0.92	0.91	0.87	0.94	0.81	0.95	0.85	0.85	0.96	0.91
105	PEtOH 34:3; PEtOH 16:1-18:2; [M-H]- C39H71O8P	MS1	M-H	697.481	207.35		157.52										206.3										0.97										0.9
105	PEtOH 34:3; PEtOH 16:1-18:2; [M-H]- C39H71O8P	MS2	M-H	279.232	207.35		22.48										206.3										0.97										0.9
105	PEtOH 34:3; PEtOH 16:1-18:2; [M-H]- C39H71O8P	MS2	M-H	253.218	207.35		7.5										206.3										0.97										0.83
105	PEtOH 34:3; PEtOH 16:1-18:2; [M-H]- C39H71O8P	MS2	M-H	697.481	207.35		6.82										206.3										0.97										0.9
105	PEtOH 34:3; PEtOH 16:1-18:2; [M-H]- C39H71O8P	MS2	M-H	435.244	207.35		1.18										206.3										0.97										0.66
105	PEtOH 34:3; PEtOH 16:1-18:2; [M-H]- C39H71O8P	MS2	M-H	152.998	207.35		0										206.3										0.97										0
105	PEtOH 34:3; PEtOH 16:1-18:2; [M-H]- C39H71O8P	MS2	M-H	125.002	207.35		0.13										206.3										0.97										0.6
106	plasmenyl-PE 34:2; [M-H]-; PE(P-16:0/18:2(2E,4E)) C39H74NO7P---plasmenyl-PE 34:2; [M-H]-; PE(P-16:0/18:2(6Z,9Z)) C39H74NO7P---plasmenyl-PE 34:2; [M-H]-; PE(P-16:0/18:2(9E,10E)) C39H74NO7P---plasmenyl-PE 34:2; [M-H]-; PE(P-16:0/18:2(9E,12E)) C39H74NO7P---plasmenyl-PE 34:2; [M-H]-; PE(P-16:0/18:2(9Z,11Z)) C39H74NO7P---plasmenyl-PE 34:2; [M-H]-; PE(P-16:0/18:2(9Z,12Z)) C39H74NO7P	MS1	M-H	698.513	246.56	128.76	73.27	115.55	73.16	118.29	132.55	93.05	304.86	265.24	91.78	246.6	246.6	246.6	246.6	246.6	246.6	246.6	246.6	246.6	246.6	0.95	0.92	0.93	0.85	0.91	0.91	0.85	0.84	0.92	0.9	0.84	0.86	0.9	0.96	0.95	0.9	0.84	0.91	0.87	0.96
106	plasmenyl-PE 34:2; [M-H]-; PE(P-16:0/18:2(2E,4E)) C39H74NO7P---plasmenyl-PE 34:2; [M-H]-; PE(P-16:0/18:2(6Z,9Z)) C39H74NO7P---plasmenyl-PE 34:2; [M-H]-; PE(P-16:0/18:2(9E,10E)) C39H74NO7P---plasmenyl-PE 34:2; [M-H]-; PE(P-16:0/18:2(9E,12E)) C39H74NO7P---plasmenyl-PE 34:2; [M-H]-; PE(P-16:0/18:2(9Z,11Z)) C39H74NO7P---plasmenyl-PE 34:2; [M-H]-; PE(P-16:0/18:2(9Z,12Z)) C39H74NO7P	MS2	M-H	279.233	246.56	33.57	15.75	28.13	12.61	25.7	25.77	19.79	50.58	58.57	18.4	246.6	246.6	246.6	246.6	246.6	246.6	246.6	246.6	246.6	246.6	0.95	0.92	0.93	0.85	0.91	0.91	0.85	0.84	0.92	0.9	0.84	0.86	0.97	0.96	0.95	0.9	0.84	0.96	0.87	0.98
106	plasmenyl-PE 34:2; [M-H]-; PE(P-16:0/18:2(2E,4E)) C39H74NO7P---plasmenyl-PE 34:2; [M-H]-; PE(P-16:0/18:2(6Z,9Z)) C39H74NO7P---plasmenyl-PE 34:2; [M-H]-; PE(P-16:0/18:2(9E,10E)) C39H74NO7P---plasmenyl-PE 34:2; [M-H]-; PE(P-16:0/18:2(9E,12E)) C39H74NO7P---plasmenyl-PE 34:2; [M-H]-; PE(P-16:0/18:2(9Z,11Z)) C39H74NO7P---plasmenyl-PE 34:2; [M-H]-; PE(P-16:0/18:2(9Z,12Z)) C39H74NO7P	MS2	M-H	698.507	246.56	7.22	3.41	5.17	5.03	2.22	8.71	0	0	13.06	2.22	246.6	246.6	246.6	246.6	246.6	246.6	246.6	246.6	246.6	246.6	0.95	0.92	0.93	0.85	0.91	0.91	0.85	0.84	0.92	0.9	0.63	0.52	0.5	0.71	0.7	0.62	0	0	0.62	0.58
106	plasmenyl-PE 34:2; [M-H]-; PE(P-16:0/18:2(2E,4E)) C39H74NO7P---plasmenyl-PE 34:2; [M-H]-; PE(P-16:0/18:2(6Z,9Z)) C39H74NO7P---plasmenyl-PE 34:2; [M-H]-; PE(P-16:0/18:2(9E,10E)) C39H74NO7P---plasmenyl-PE 34:2; [M-H]-; PE(P-16:0/18:2(9E,12E)) C39H74NO7P---plasmenyl-PE 34:2; [M-H]-; PE(P-16:0/18:2(9Z,11Z)) C39H74NO7P---plasmenyl-PE 34:2; [M-H]-; PE(P-16:0/18:2(9Z,12Z)) C39H74NO7P	MS2	M-H	436.281	246.56	0.24	2.34	0.58	2.12	1.42	0.94	1.76	3.74	5.04	1.89	246.6	246.6	246.6	246.6	246.6	246.6	246.6	246.6	246.6	246.6	0.95	0.92	0.93	0.85	0.91	0.91	0.85	0.84	0.92	0.9	0.32	0.75	0.63	0.69	0.79	0.77	0.47	0.7	0.91	0.69
106	plasmenyl-PE 34:2; [M-H]-; PE(P-16:0/18:2(2E,4E)) C39H74NO7P---plasmenyl-PE 34:2; [M-H]-; PE(P-16:0/18:2(6Z,9Z)) C39H74NO7P---plasmenyl-PE 34:2; [M-H]-; PE(P-16:0/18:2(9E,10E)) C39H74NO7P---plasmenyl-PE 34:2; [M-H]-; PE(P-16:0/18:2(9E,12E)) C39H74NO7P---plasmenyl-PE 34:2; [M-H]-; PE(P-16:0/18:2(9Z,11Z)) C39H74NO7P---plasmenyl-PE 34:2; [M-H]-; PE(P-16:0/18:2(9Z,12Z)) C39H74NO7P	MS2	M-H	418.271	246.56	1.59	0.69	0.81	0.46	0	1.39	0	1.15	2.77	1.39	246.6	246.6	246.6	246.6	246.6	246.6	246.6	246.6	246.6	246.6	0.95	0.92	0.93	0.85	0.91	0.91	0.85	0.84	0.92	0.9	0.56	0.6	0.63	0.6	0	0.58	0	0.66	0.78	0.33
106	plasmenyl-PE 34:2; [M-H]-; PE(P-16:0/18:2(2E,4E)) C39H74NO7P---plasmenyl-PE 34:2; [M-H]-; PE(P-16:0/18:2(6Z,9Z)) C39H74NO7P---plasmenyl-PE 34:2; [M-H]-; PE(P-16:0/18:2(9E,10E)) C39H74NO7P---plasmenyl-PE 34:2; [M-H]-; PE(P-16:0/18:2(9E,12E)) C39H74NO7P---plasmenyl-PE 34:2; [M-H]-; PE(P-16:0/18:2(9Z,11Z)) C39H74NO7P---plasmenyl-PE 34:2; [M-H]-; PE(P-16:0/18:2(9Z,12Z)) C39H74NO7P	MS2	M-H	255.234	246.56	9.42	10.87	11.09	15.45	12.4	11.92	9.64	28.56	18.92	13.17	246.6	246.6	246.6	246.6	246.6	246.6	246.6	246.6	246.6	246.6	0.95	0.92	0.93	0.85	0.91	0.91	0.85	0.84	0.92	0.9	0.86	0.98	0.9	0.96	0.97	0.94	0.94	0.91	0.76	0.96
106	plasmenyl-PE 34:2; [M-H]-; PE(P-16:0/18:2(2E,4E)) C39H74NO7P---plasmenyl-PE 34:2; [M-H]-; PE(P-16:0/18:2(6Z,9Z)) C39H74NO7P---plasmenyl-PE 34:2; [M-H]-; PE(P-16:0/18:2(9E,10E)) C39H74NO7P---plasmenyl-PE 34:2; [M-H]-; PE(P-16:0/18:2(9E,12E)) C39H74NO7P---plasmenyl-PE 34:2; [M-H]-; PE(P-16:0/18:2(9Z,11Z)) C39H74NO7P---plasmenyl-PE 34:2; [M-H]-; PE(P-16:0/18:2(9Z,12Z)) C39H74NO7P	MS2	M-H	698.537	246.56	0.29	0.88	0	0	0	0	0	2.36	0	0	246.6	246.6	246.6	246.6	246.6	246.6	246.6	246.6	246.6	246.6	0.95	0.92	0.93	0.85	0.91	0.91	0.85	0.84	0.92	0.9	0.56	0.6	0	0	0	0	0	0.39	0	0
107	Cer-NP t41:0; Cer-NP t18:0/23:0; [M-H]- C41H83NO4	MS1	M+HCOO	698.629	311.62	33.13	24.57	34.53	39.63	52.08		17.32		55.07	27.33	312.5	311.6	311.3	312.5	312.5		311.6		311.3	312.5	0.9	0.85	0.75	0.87	0.89		0.83		0.73	0.73	0.92	0.58	0.91	0.85	0.86		0.62		0.82	0.92
107	Cer-NP t41:0; Cer-NP t18:0/23:0; [M-H]- C41H83NO4	MS2	M+HCOO	652.63	311.62	6.15	4.58	6.86	8.87	9.87		1.73		5.45	9.28	312.5	311.6	311.3	312.5	312.5		311.6		311.3	312.5	0.9	0.85	0.75	0.87	0.89		0.83		0.73	0.73	0.87	0.58	0.94	0.85	0.77		0.38		0.82	0.92
107	Cer-NP t41:0; Cer-NP t18:0/23:0; [M-H]- C41H83NO4	MS2	M+HCOO	616.608	311.62	12.23	11.95	12.76	9.37	21.02		3.76		21.12	15.56	312.5	311.6	311.3	312.5	312.5		311.6		311.3	312.5	0.9	0.85	0.75	0.87	0.89		0.83		0.73	0.73	0.95	0.93	0.91	0.84	0.86		0.82		0.93	0.92
107	Cer-NP t41:0; Cer-NP t18:0/23:0; [M-H]- C41H83NO4	MS2	M+HCOO	255.233	311.62	3.16	6.85	0	2.07	3.73		1.8		0	0	312.5	311.6	311.3	312.5	312.5		311.6		311.3	312.5	0.9	0.85	0.75	0.87	0.89		0.83		0.73	0.73	0.92	0.11	0	0.85	0.63		0.16		0	0
107	Cer-NP t41:0; Cer-NP t18:0/23:0; [M-H]- C41H83NO4	MS2	M+HCOO	408.381	311.62	1.6	0	0	0	2.28		1.83		1.6	0	312.5	311.6	311.3	312.5	312.5		311.6		311.3	312.5	0.9	0.85	0.75	0.87	0.89		0.83		0.73	0.73	0.9	0	0	0	0.9		0.62		0.68	0
107	Cer-NP t41:0; Cer-NP t18:0/23:0; [M-H]- C41H83NO4	MS2	M+HCOO	378.374	311.62	0	0	0	0.44	0		0		0	0	312.5	311.6	311.3	312.5	312.5		311.6		311.3	312.5	0.9	0.85	0.75	0.87	0.89		0.83		0.73	0.73	0	0	0	0.64	0		0		0	0
107	Cer-NP t41:0; Cer-NP t18:0/23:0; [M-H]- C41H83NO4	MS2	M+HCOO	200.956	311.62	0.64	2.63	0	0	1.27		0		0.32	0	312.5	311.6	311.3	312.5	312.5		311.6		311.3	312.5	0.9	0.85	0.75	0.87	0.89		0.83		0.73	0.73	0.31	0.45	0	0	0.49		0		0.59	0
108	PEtOH 34:2; PEtOH 16:0-18:2; [M-H]- C39H73O8P	MS1	M-H	699.496	221.49	57.7	1023.43	37.72	97.06	168.84	18.9			23.51		221	222.2	222.2	221	221	221			221		0.99	1	0.94	0.97	0.99	0.98			0.98		0.61	0.89	0.67	0.72	0.84	0.86			0.75
108	PEtOH 34:2; PEtOH 16:0-18:2; [M-H]- C39H73O8P	MS2	M-H	279.233	221.49	11.07	195.68	6.16	13.67	31.11	6.91			9.48		221	222.2	222.2	221	221	221			221		0.99	1	0.94	0.97	0.99	0.98			0.98		0.93	0.93	0.77	0.92	0.89	0.86			0.78
108	PEtOH 34:2; PEtOH 16:0-18:2; [M-H]- C39H73O8P	MS2	M-H	255.233	221.49	7.77	66.91	12.59	10.92	18.83	3.09			4.82		221	222.2	222.2	221	221	221			221		0.99	1	0.94	0.97	0.99	0.98			0.98		0.61	0.89	0.67	0.62	0.84	0.88			0.75
108	PEtOH 34:2; PEtOH 16:0-18:2; [M-H]- C39H73O8P	MS2	M-H	437.268	221.49	0	10.75	0	1.42	3.04	0			0		221	222.2	222.2	221	221	221			221		0.99	1	0.94	0.97	0.99	0.98			0.98		0	0.89	0	0.72	0.8	0			0
109	PE 33:2; PE 15:0-18:2; [M-H]- C38H72NO8P	MS1	M-H	700.492	225.89			43.22	49.56		31.02			50.77				223.4	222.2		225.9			224.6				0.73	0.69		0.8			0.88				0.61	0.61		0.52			0.52
109	PE 33:2; PE 15:0-18:2; [M-H]- C38H72NO8P	MS2	M-H	241.213	225.89			0	0		0.61			0.61				223.4	222.2		225.9			224.6				0.73	0.69		0.8			0.88				0	0		0.52			0.74
109	PE 33:2; PE 15:0-18:2; [M-H]- C38H72NO8P	MS2	M-H	279.234	225.89			7.34	14.79		14.13			16.21				223.4	222.2		225.9			224.6				0.73	0.69		0.8			0.88				0.61	0.9		0.57			0.52
109	PE 33:2; PE 15:0-18:2; [M-H]- C38H72NO8P	MS2	M-H	700.483	225.89			5.05	0.6		0			1.79				223.4	222.2		225.9			224.6				0.73	0.69		0.8			0.88				0.63	0.61		0			0.5
109	PE 33:2; PE 15:0-18:2; [M-H]- C38H72NO8P	MS2	M-H	265.216	225.89			0	0		0			0				223.4	222.2		225.9			224.6				0.73	0.69		0.8			0.88				0	0		0			0
110	PE 34:2e; PE 16:1e/18:1; [M-H]- C39H76NO7P---plasmenyl-PE 34:1; [M-H]-; PE(P-16:0/18:1(11E)) C39H76NO7P---plasmenyl-PE 34:1; [M-H]-; PE(P-16:0/18:1(11Z)) C39H76NO7P---plasmenyl-PE 34:1; [M-H]-; PE(P-16:0/18:1(13Z)) C39H76NO7P---plasmenyl-PE 34:1; [M-H]-; PE(P-16:0/18:1(17Z)) C39H76NO7P---plasmenyl-PE 34:1; [M-H]-; PE(P-16:0/18:1(4E)) C39H76NO7P---plasmenyl-PE 34:1; [M-H]-; PE(P-16:0/18:1(6Z)) C39…	MS1	M-H	700.528	261.73	310.11	68.27	133.62	122.55	127.5	89.72	83.2	542.39	211.1	99.1	261.2	261.2	261.2	261.2	261.2	261.2	261.2	261.2	261.2	261.2	0.97	0.91	0.93	0.86	0.95	0.88	0.94	0.87	0.95	0.91	0.98	0.92	0.91	0.92	0.87	0.9	0.93	0.93	0.94	0.87
110	PE 34:2e; PE 16:1e/18:1; [M-H]- C39H76NO7P---plasmenyl-PE 34:1; [M-H]-; PE(P-16:0/18:1(11E)) C39H76NO7P---plasmenyl-PE 34:1; [M-H]-; PE(P-16:0/18:1(11Z)) C39H76NO7P---plasmenyl-PE 34:1; [M-H]-; PE(P-16:0/18:1(13Z)) C39H76NO7P---plasmenyl-PE 34:1; [M-H]-; PE(P-16:0/18:1(17Z)) C39H76NO7P---plasmenyl-PE 34:1; [M-H]-; PE(P-16:0/18:1(4E)) C39H76NO7P---plasmenyl-PE 34:1; [M-H]-; PE(P-16:0/18:1(6Z)) C39…	MS2	M-H	281.249	261.73	64.82	10.49	18.25	14.05	22.36	10.22	14.46	65.02	32.97	12.19	261.2	261.2	261.2	261.2	261.2	261.2	261.2	261.2	261.2	261.2	0.97	0.91	0.93	0.86	0.95	0.88	0.94	0.87	0.95	0.91	0.98	0.94	0.91	0.91	0.95	0.9	0.94	0.92	0.91	0.87
110	PE 34:2e; PE 16:1e/18:1; [M-H]- C39H76NO7P---plasmenyl-PE 34:1; [M-H]-; PE(P-16:0/18:1(11E)) C39H76NO7P---plasmenyl-PE 34:1; [M-H]-; PE(P-16:0/18:1(11Z)) C39H76NO7P---plasmenyl-PE 34:1; [M-H]-; PE(P-16:0/18:1(13Z)) C39H76NO7P---plasmenyl-PE 34:1; [M-H]-; PE(P-16:0/18:1(17Z)) C39H76NO7P---plasmenyl-PE 34:1; [M-H]-; PE(P-16:0/18:1(4E)) C39H76NO7P---plasmenyl-PE 34:1; [M-H]-; PE(P-16:0/18:1(6Z)) C39…	MS2	M-H	700.532	261.73	24.93	6.51	5.49	8.58	8.27	7.84	7.69	55.3	22.85	13.75	261.2	261.2	261.2	261.2	261.2	261.2	261.2	261.2	261.2	261.2	0.97	0.91	0.93	0.86	0.95	0.88	0.94	0.87	0.95	0.91	0.98	0.92	0.96	0.94	0.78	0.97	0.75	0.86	0.94	0.93
110	PE 34:2e; PE 16:1e/18:1; [M-H]- C39H76NO7P---plasmenyl-PE 34:1; [M-H]-; PE(P-16:0/18:1(11E)) C39H76NO7P---plasmenyl-PE 34:1; [M-H]-; PE(P-16:0/18:1(11Z)) C39H76NO7P---plasmenyl-PE 34:1; [M-H]-; PE(P-16:0/18:1(13Z)) C39H76NO7P---plasmenyl-PE 34:1; [M-H]-; PE(P-16:0/18:1(17Z)) C39H76NO7P---plasmenyl-PE 34:1; [M-H]-; PE(P-16:0/18:1(4E)) C39H76NO7P---plasmenyl-PE 34:1; [M-H]-; PE(P-16:0/18:1(6Z)) C39…	MS2	M-H	255.233	261.73	11.51	6.61	12.34	13.29	11.25	7.92	6.69	62	16.26	5.81	261.2	261.2	261.2	261.2	261.2	261.2	261.2	261.2	261.2	261.2	0.97	0.91	0.93	0.86	0.95	0.88	0.94	0.87	0.95	0.91	0.83	0.79	0.89	0.92	0.87	0.83	0.93	0.9	0.95	0.81
110	PE 34:2e; PE 16:1e/18:1; [M-H]- C39H76NO7P---plasmenyl-PE 34:1; [M-H]-; PE(P-16:0/18:1(11E)) C39H76NO7P---plasmenyl-PE 34:1; [M-H]-; PE(P-16:0/18:1(11Z)) C39H76NO7P---plasmenyl-PE 34:1; [M-H]-; PE(P-16:0/18:1(13Z)) C39H76NO7P---plasmenyl-PE 34:1; [M-H]-; PE(P-16:0/18:1(17Z)) C39H76NO7P---plasmenyl-PE 34:1; [M-H]-; PE(P-16:0/18:1(4E)) C39H76NO7P---plasmenyl-PE 34:1; [M-H]-; PE(P-16:0/18:1(6Z)) C39…	MS2	M-H	436.283	261.73	3.96	0.47	1.41	0.94	1.3	1.41	1.06	7.72	4.34	0.94	261.2	261.2	261.2	261.2	261.2	261.2	261.2	261.2	261.2	261.2	0.97	0.91	0.93	0.86	0.95	0.88	0.94	0.87	0.95	0.91	0.95	0.87	0.76	0.6	0.3	0.86	0.64	0.94	0.61	0.66
110	PE 34:2e; PE 16:1e/18:1; [M-H]- C39H76NO7P---plasmenyl-PE 34:1; [M-H]-; PE(P-16:0/18:1(11E)) C39H76NO7P---plasmenyl-PE 34:1; [M-H]-; PE(P-16:0/18:1(11Z)) C39H76NO7P---plasmenyl-PE 34:1; [M-H]-; PE(P-16:0/18:1(13Z)) C39H76NO7P---plasmenyl-PE 34:1; [M-H]-; PE(P-16:0/18:1(17Z)) C39H76NO7P---plasmenyl-PE 34:1; [M-H]-; PE(P-16:0/18:1(4E)) C39H76NO7P---plasmenyl-PE 34:1; [M-H]-; PE(P-16:0/18:1(6Z)) C39…	MS2	M-H	418.276	261.73	0	0	0	0	0	0.46	0.46	2.53	1.15	0	261.2	261.2	261.2	261.2	261.2	261.2	261.2	261.2	261.2	261.2	0.97	0.91	0.93	0.86	0.95	0.88	0.94	0.87	0.95	0.91	0	0	0	0	0	0.49	0.65	0.61	0.83	0
110	PE 34:2e; PE 16:1e/18:1; [M-H]- C39H76NO7P---plasmenyl-PE 34:1; [M-H]-; PE(P-16:0/18:1(11E)) C39H76NO7P---plasmenyl-PE 34:1; [M-H]-; PE(P-16:0/18:1(11Z)) C39H76NO7P---plasmenyl-PE 34:1; [M-H]-; PE(P-16:0/18:1(13Z)) C39H76NO7P---plasmenyl-PE 34:1; [M-H]-; PE(P-16:0/18:1(17Z)) C39H76NO7P---plasmenyl-PE 34:1; [M-H]-; PE(P-16:0/18:1(4E)) C39H76NO7P---plasmenyl-PE 34:1; [M-H]-; PE(P-16:0/18:1(6Z)) C39…	MS2	M-H	253.218	261.73	0.54	0	0.58	1.08	0	0	0.63	3.2	0.9	0	261.2	261.2	261.2	261.2	261.2	261.2	261.2	261.2	261.2	261.2	0.97	0.91	0.93	0.86	0.95	0.88	0.94	0.87	0.95	0.91	0.61	0	0.76	0.65	0	0	0.65	0.93	0.54	0
111	PEtOH 34:1; PEtOH 16:0-18:1; [M-H]- C39H75O8P	MS1	M-H	701.51	235.89		120.01										235.6										0.81										0.79
111	PEtOH 34:1; PEtOH 16:0-18:1; [M-H]- C39H75O8P	MS2	M-H	281.25	235.89		54.48										235.6										0.81										0.79
111	PEtOH 34:1; PEtOH 16:0-18:1; [M-H]- C39H75O8P	MS2	M-H	255.235	235.89		438.98										235.6										0.81										0.9
112	PE 33:1; PE 16:0-17:1; [M-H]- C38H74NO8P	MS1	M-H	702.508	239.75	26.99	85.39			37.07	27.66			52.11		239.3	236.8			240.5	240.5			240.5		0.73	0.63			0.71	0.86			0.78		0.59	0.79			0.7	0.61			0.78
112	PE 33:1; PE 16:0-17:1; [M-H]- C38H74NO8P	MS2	M-H	267.233	239.75	1.01	2.94			1.11	2.75			3.31		239.3	236.8			240.5	240.5			240.5		0.73	0.63			0.71	0.86			0.78		0.82	0.51			0.63	0.7			0.78
112	PE 33:1; PE 16:0-17:1; [M-H]- C38H74NO8P	MS2	M-H	255.232	239.75	427.72	463.71			241.5	95.64			86.21		239.3	236.8			240.5	240.5			240.5		0.73	0.63			0.71	0.86			0.78		0.36	0.79			0.22	0.23			0.48
112	PE 33:1; PE 16:0-17:1; [M-H]- C38H74NO8P	MS2	M-H	281.249	239.75	39.8	62.62			13.53	8.5			11.17		239.3	236.8			240.5	240.5			240.5		0.73	0.63			0.71	0.86			0.78		0.21	0.71			0.09	0.21			0.66
112	PE 33:1; PE 16:0-17:1; [M-H]- C38H74NO8P	MS2	M-H	702.51	239.75	1.64	6.23			0.6	3.12			5.17		239.3	236.8			240.5	240.5			240.5		0.73	0.63			0.71	0.86			0.78		0.59	0.79			0.7	0.61			0.84
112	PE 33:1; PE 16:0-17:1; [M-H]- C38H74NO8P	MS2	M-H	241.217	239.75	0	0			0.7	0.35			0		239.3	236.8			240.5	240.5			240.5		0.73	0.63			0.71	0.86			0.78		0	0			0.76	0.53			0
112	PE 33:1; PE 16:0-17:1; [M-H]- C38H74NO8P	MS2	M-H	269.247	239.75	0.19	0			1.85	0			0		239.3	236.8			240.5	240.5			240.5		0.73	0.63			0.71	0.86			0.78		0.31	0			0.7	0			0
113	1-Hexadecyl-2-(9Z-octadecenoyl)-sn-glycero-3-phosphoethanolamine [M-H]- C39H78NO7P NIST 1148471---PE 34:1e; PE 16:0e/18:1; [M-H]- C39H78NO7P---PE 34:1e; PE 18:1e/16:0; [M-H]- C39H78NO7P---plasmenyl-PE 34:0; [M-H]-; PE(P-18:0/16:0) C39H78NO7P	MS1	M-H	702.541	263.04	77.01		56.95	49.25		35.12		119.52	82.07	47.02	262.5		263.7	262.5		262.5		262.5	262.5	263.7	0.84		0.92	0.83		0.83		0.94	0.9	0.9	0.63		0.76	0.7		0.73		0.86	0.54	0.69
113	1-Hexadecyl-2-(9Z-octadecenoyl)-sn-glycero-3-phosphoethanolamine [M-H]- C39H78NO7P NIST 1148471---PE 34:1e; PE 16:0e/18:1; [M-H]- C39H78NO7P---PE 34:1e; PE 18:1e/16:0; [M-H]- C39H78NO7P---plasmenyl-PE 34:0; [M-H]-; PE(P-18:0/16:0) C39H78NO7P	MS2	M-H	255.232	263.04	15.72		19.47	11.87		8.84		27.25	17.95	11.39	262.5		263.7	262.5		262.5		262.5	262.5	263.7	0.84		0.92	0.83		0.83		0.94	0.9	0.9	0.77		0.76	0.8		0.73		0.86	0.79	0.72
113	1-Hexadecyl-2-(9Z-octadecenoyl)-sn-glycero-3-phosphoethanolamine [M-H]- C39H78NO7P NIST 1148471---PE 34:1e; PE 16:0e/18:1; [M-H]- C39H78NO7P---PE 34:1e; PE 18:1e/16:0; [M-H]- C39H78NO7P---plasmenyl-PE 34:0; [M-H]-; PE(P-18:0/16:0) C39H78NO7P	MS2	M-H	702.546	263.04	5.33		3.86	2.65		4.49		11.7	2.38	2.69	262.5		263.7	262.5		262.5		262.5	262.5	263.7	0.84		0.92	0.83		0.83		0.94	0.9	0.9	0.63		0.63	0.7		0.85		0.94	0.54	0.69
113	1-Hexadecyl-2-(9Z-octadecenoyl)-sn-glycero-3-phosphoethanolamine [M-H]- C39H78NO7P NIST 1148471---PE 34:1e; PE 16:0e/18:1; [M-H]- C39H78NO7P---PE 34:1e; PE 18:1e/16:0; [M-H]- C39H78NO7P---plasmenyl-PE 34:0; [M-H]-; PE(P-18:0/16:0) C39H78NO7P	MS2	M-H	464.311	263.04	0		0.73	0		0		0.97	0	0	262.5		263.7	262.5		262.5		262.5	262.5	263.7	0.84		0.92	0.83		0.83		0.94	0.9	0.9	0		0.42	0		0		0.58	0	0
113	1-Hexadecyl-2-(9Z-octadecenoyl)-sn-glycero-3-phosphoethanolamine [M-H]- C39H78NO7P NIST 1148471---PE 34:1e; PE 16:0e/18:1; [M-H]- C39H78NO7P---PE 34:1e; PE 18:1e/16:0; [M-H]- C39H78NO7P---plasmenyl-PE 34:0; [M-H]-; PE(P-18:0/16:0) C39H78NO7P	MS2	M-H	283.262	263.04	5.59		3.98	2.54		0		5.57	4.86	4.15	262.5		263.7	262.5		262.5		262.5	262.5	263.7	0.84		0.92	0.83		0.83		0.94	0.9	0.9	0.58		0.77	0.49		0		0.49	0.47	0.23
113	1-Hexadecyl-2-(9Z-octadecenoyl)-sn-glycero-3-phosphoethanolamine [M-H]- C39H78NO7P NIST 1148471---PE 34:1e; PE 16:0e/18:1; [M-H]- C39H78NO7P---PE 34:1e; PE 18:1e/16:0; [M-H]- C39H78NO7P---plasmenyl-PE 34:0; [M-H]-; PE(P-18:0/16:0) C39H78NO7P	MS2	M-H	446.302	263.04	0		0	0		0		0	0	0	262.5		263.7	262.5		262.5		262.5	262.5	263.7	0.84		0.92	0.83		0.83		0.94	0.9	0.9	0		0	0		0		0	0	0
113	1-Hexadecyl-2-(9Z-octadecenoyl)-sn-glycero-3-phosphoethanolamine [M-H]- C39H78NO7P NIST 1148471---PE 34:1e; PE 16:0e/18:1; [M-H]- C39H78NO7P---PE 34:1e; PE 18:1e/16:0; [M-H]- C39H78NO7P---plasmenyl-PE 34:0; [M-H]-; PE(P-18:0/16:0) C39H78NO7P	MS2	M-H	254.449	263.04	0		0	0		0		0	0	0	262.5		263.7	262.5		262.5		262.5	262.5	263.7	0.84		0.92	0.83		0.83		0.94	0.9	0.9	0		0	0		0		0	0	0
114	Cer-NS d43:2; Cer-NS d14:1/29:1; [M-H]- C43H83NO3---Cer-NS d43:2; Cer-NS d18:1/25:1; [M-H]- C43H83NO3---Cer-NS d43:2; Cer-NS d20:2/23:0; [M-H]- C43H83NO3	MS1	M+HCOO	706.635	320.56				23.1										320.6										0.71										0.55
114	Cer-NS d43:2; Cer-NS d14:1/29:1; [M-H]- C43H83NO3---Cer-NS d43:2; Cer-NS d18:1/25:1; [M-H]- C43H83NO3---Cer-NS d43:2; Cer-NS d20:2/23:0; [M-H]- C43H83NO3	MS2	M+HCOO	660.635	320.56				3.48										320.6										0.71										0.55
114	Cer-NS d43:2; Cer-NS d14:1/29:1; [M-H]- C43H83NO3---Cer-NS d43:2; Cer-NS d18:1/25:1; [M-H]- C43H83NO3---Cer-NS d43:2; Cer-NS d20:2/23:0; [M-H]- C43H83NO3	MS2	M+HCOO	404.385	320.56				0										320.6										0.71										0
114	Cer-NS d43:2; Cer-NS d14:1/29:1; [M-H]- C43H83NO3---Cer-NS d43:2; Cer-NS d18:1/25:1; [M-H]- C43H83NO3---Cer-NS d43:2; Cer-NS d20:2/23:0; [M-H]- C43H83NO3	MS2	M+HCOO	630.618	320.56				1.42										320.6										0.71										0.58
114	Cer-NS d43:2; Cer-NS d14:1/29:1; [M-H]- C43H83NO3---Cer-NS d43:2; Cer-NS d18:1/25:1; [M-H]- C43H83NO3---Cer-NS d43:2; Cer-NS d20:2/23:0; [M-H]- C43H83NO3	MS2	M+HCOO	420.386	320.56				0										320.6										0.71										0
114	Cer-NS d43:2; Cer-NS d14:1/29:1; [M-H]- C43H83NO3---Cer-NS d43:2; Cer-NS d18:1/25:1; [M-H]- C43H83NO3---Cer-NS d43:2; Cer-NS d20:2/23:0; [M-H]- C43H83NO3	MS2	M+HCOO	158.975	320.56				32.11										320.6										0.71										0.53
114	Cer-NS d43:2; Cer-NS d14:1/29:1; [M-H]- C43H83NO3---Cer-NS d43:2; Cer-NS d18:1/25:1; [M-H]- C43H83NO3---Cer-NS d43:2; Cer-NS d20:2/23:0; [M-H]- C43H83NO3	MS2	M+HCOO	628.615	320.56				0										320.6										0.71										0
115	Cer-NS d43:1; Cer-NS d18:1/25:0; [M-H]- C43H85NO3	MS1	M+HCOO	708.651	336.3		69.61				55.96			127.83			335.7				335.7			335.7			0.84				0.84			0.84			0.81				0.61			0.58
115	Cer-NS d43:1; Cer-NS d18:1/25:0; [M-H]- C43H85NO3	MS2	M+HCOO	662.646	336.3		4.77				1.87			9.51			335.7				335.7			335.7			0.84				0.84			0.84			0.87				0.81			0.9
115	Cer-NS d43:1; Cer-NS d18:1/25:0; [M-H]- C43H85NO3	MS2	M+HCOO	406.406	336.3		2.28				0.68			1.25			335.7				335.7			335.7			0.84				0.84			0.84			0.81				0.61			0.58
115	Cer-NS d43:1; Cer-NS d18:1/25:0; [M-H]- C43H85NO3	MS2	M+HCOO	632.637	336.3		0				0			0			335.7				335.7			335.7			0.84				0.84			0.84			0				0			0
115	Cer-NS d43:1; Cer-NS d18:1/25:0; [M-H]- C43H85NO3	MS2	M+HCOO	381.38	336.3		0				0			0			335.7				335.7			335.7			0.84				0.84			0.84			0				0			0
115	Cer-NS d43:1; Cer-NS d18:1/25:0; [M-H]- C43H85NO3	MS2	M+HCOO	380.393	336.3		0				0			0			335.7				335.7			335.7			0.84				0.84			0.84			0				0			0
115	Cer-NS d43:1; Cer-NS d18:1/25:0; [M-H]- C43H85NO3	MS2	M+HCOO	630.622	336.3		0				0			0			335.7				335.7			335.7			0.84				0.84			0.84			0				0			0
116	PA 37:4; PA 18:2-19:2; [M-H]- C40H71O8P	MS1	M-H	709.482	181.28	42.75	30.33	114.73	269.11	158.87					41.77	181.3	181.3	181.9	188	181.9					181.3	0.61	0.62	0.63	0.74	0.8					0.58	0.52	0.6	0.67	0.58	0.75					0.68
116	PA 37:4; PA 18:2-19:2; [M-H]- C40H71O8P	MS2	M-H	279.231	181.28	0	0	0	0	5.65					0	181.3	181.3	181.9	188	181.9					181.3	0.61	0.62	0.63	0.74	0.8					0.58	0	0	0	0	0.34					0
116	PA 37:4; PA 18:2-19:2; [M-H]- C40H71O8P	MS2	M-H	152.997	181.28	0	0	0	1.33	1.12					0	181.3	181.3	181.9	188	181.9					181.3	0.61	0.62	0.63	0.74	0.8					0.58	0	0	0	0.17	0.39					0
116	PA 37:4; PA 18:2-19:2; [M-H]- C40H71O8P	MS2	M-H	255.232	181.28	16.27	27.75	97.04	99.16	52.03					38.72	181.3	181.3	181.9	188	181.9					181.3	0.61	0.62	0.63	0.74	0.8					0.58	0.52	0.6	0.67	0.58	0.75					0.68
116	PA 37:4; PA 18:2-19:2; [M-H]- C40H71O8P	MS2	M-H	255.239	181.28	16.27	26.58	97.04	99.16	52.03					38.54	181.3	181.3	181.9	188	181.9					181.3	0.61	0.62	0.63	0.74	0.8					0.58	0.52	0.6	0.67	0.58	0.75					0.68
116	PA 37:4; PA 18:2-19:2; [M-H]- C40H71O8P	MS2	M-H	61.9884	181.28	16.98	32.07	90.59	83.46	42.24					37.73	181.3	181.3	181.9	188	181.9					181.3	0.61	0.62	0.63	0.74	0.8					0.58	0.73	0.69	0.7	0.7	0.67					0.59
117	Cer-NP t42:1; Cer-NP t18:0/24:1; [M-H]- C42H83NO4	MS1	M+HCOO	710.628	303.13	61.6	58.16	79.03	66.25	100.3	49.32			95.25	54.75	302.7	302.7	303.1	302.7	302.7	302.7			302.7	302.7	0.88	0.71	0.71	0.87	0.82	0.69			0.79	0.8	0.71	0.6	0.53	0.67	0.83	0.64			0.72	0.84
117	Cer-NP t42:1; Cer-NP t18:0/24:1; [M-H]- C42H83NO4	MS2	M+HCOO	664.63	303.13	12.69	11.69	10.24	4.75	13.92	5.62			17.13	7.52	302.7	302.7	303.1	302.7	302.7	302.7			302.7	302.7	0.88	0.71	0.71	0.87	0.82	0.69			0.79	0.8	0.92	0.96	0.53	0.96	0.89	0.93			0.79	0.86
117	Cer-NP t42:1; Cer-NP t18:0/24:1; [M-H]- C42H83NO4	MS2	M+HCOO	365.34	303.13	1.08	0	0	0.22	1.73	0			3.65	1.08	302.7	302.7	303.1	302.7	302.7	302.7			302.7	302.7	0.88	0.71	0.71	0.87	0.82	0.69			0.79	0.8	0.45	0	0	0.67	0.83	0			0.67	0.6
117	Cer-NP t42:1; Cer-NP t18:0/24:1; [M-H]- C42H83NO4	MS2	M+HCOO	408.386	303.13	2.27	1.71	1.71	1.35	2.28	0.91			1.82	0.46	302.7	302.7	303.1	302.7	302.7	302.7			302.7	302.7	0.88	0.71	0.71	0.87	0.82	0.69			0.79	0.8	0.6	0.6	0.75	0.43	0.83	0.64			0.72	0.84
117	Cer-NP t42:1; Cer-NP t18:0/24:1; [M-H]- C42H83NO4	MS2	M+HCOO	420.393	303.13	0.46	0	0	0.23	0	0			0	0	302.7	302.7	303.1	302.7	302.7	302.7			302.7	302.7	0.88	0.71	0.71	0.87	0.82	0.69			0.79	0.8	0.71	0	0	0.67	0	0			0	0
117	Cer-NP t42:1; Cer-NP t18:0/24:1; [M-H]- C42H83NO4	MS2	M+HCOO	390.376	303.13	0	0	0	0	0	0			0	0	302.7	302.7	303.1	302.7	302.7	302.7			302.7	302.7	0.88	0.71	0.71	0.87	0.82	0.69			0.79	0.8	0	0	0	0	0	0			0	0
117	Cer-NP t42:1; Cer-NP t18:0/24:1; [M-H]- C42H83NO4	MS2	M+HCOO	628.608	303.13	0	0	0	0.85	1.13	0			0	0	302.7	302.7	303.1	302.7	302.7	302.7			302.7	302.7	0.88	0.71	0.71	0.87	0.82	0.69			0.79	0.8	0	0	0	0.51	0.6	0			0	0
118	PE 34:3; PE 16:0-18:3; [M-H]- C39H72NO8P---PE 34:3; PE 16:1-18:2; [M-H]- C39H72NO8P	MS1	M-H	712.493	219.9	782.98	815.71	782.91	773.49	1474.46	817.56	736.32	158.09	1985.43	669.73	219.7	221	219.7	218.5	219.7	219.7	219.7	219.7	219.7	219.7	0.97	0.92	0.96	0.95	0.96	0.97	0.96	0.88	0.96	0.97	0.87	0.82	0.82	0.7	0.9	0.93	0.83	0.75	0.97	0.89
118	PE 34:3; PE 16:0-18:3; [M-H]- C39H72NO8P---PE 34:3; PE 16:1-18:2; [M-H]- C39H72NO8P	MS2	M-H	279.233	219.9	116.88	107.97	99.55	67.56	144.56	120.34	104.34	14.44	272.1	92.31	219.7	221	219.7	218.5	219.7	219.7	219.7	219.7	219.7	219.7	0.97	0.92	0.96	0.95	0.96	0.97	0.96	0.88	0.96	0.97	0.82	0.81	0.81	0.7	0.86	0.89	0.83	0.88	0.94	0.88
118	PE 34:3; PE 16:0-18:3; [M-H]- C39H72NO8P---PE 34:3; PE 16:1-18:2; [M-H]- C39H72NO8P	MS2	M-H	253.218	219.9	34.43	29.08	26.66	27.65	44.83	34.56	36.67	5	89.61	26.79	219.7	221	219.7	218.5	219.7	219.7	219.7	219.7	219.7	219.7	0.97	0.92	0.96	0.95	0.96	0.97	0.96	0.88	0.96	0.97	0.87	0.82	0.78	0.57	0.9	0.93	0.82	0.75	0.89	0.89
118	PE 34:3; PE 16:0-18:3; [M-H]- C39H72NO8P---PE 34:3; PE 16:1-18:2; [M-H]- C39H72NO8P	MS2	M-H	712.492	219.9	58.94	52.8	45.91	39.24	81.99	70.6	61	7.35	156.83	56.2	219.7	221	219.7	218.5	219.7	219.7	219.7	219.7	219.7	219.7	0.97	0.92	0.96	0.95	0.96	0.97	0.96	0.88	0.96	0.97	0.92	0.96	0.92	0.78	0.93	0.93	0.91	0.7	0.97	0.97
118	PE 34:3; PE 16:0-18:3; [M-H]- C39H72NO8P---PE 34:3; PE 16:1-18:2; [M-H]- C39H72NO8P	MS2	M-H	450.261	219.9	4.99	0	1.55	2.95	5.73	2.39	5.57	0.96	11.4	5.24	219.7	221	219.7	218.5	219.7	219.7	219.7	219.7	219.7	219.7	0.97	0.92	0.96	0.95	0.96	0.97	0.96	0.88	0.96	0.97	0.77	0	0.82	0.63	0.86	0.59	0.81	0.55	0.9	0.69
118	PE 34:3; PE 16:0-18:3; [M-H]- C39H72NO8P---PE 34:3; PE 16:1-18:2; [M-H]- C39H72NO8P	MS2	M-H	196.038	219.9	0.7	0	0	0	2.2	1.72	1.26	0	4.15	1.42	219.7	221	219.7	218.5	219.7	219.7	219.7	219.7	219.7	219.7	0.97	0.92	0.96	0.95	0.96	0.97	0.96	0.88	0.96	0.97	0.62	0	0	0	0.83	0.61	0.69	0	0.89	0.8
118	PE 34:3; PE 16:0-18:3; [M-H]- C39H72NO8P---PE 34:3; PE 16:1-18:2; [M-H]- C39H72NO8P	MS2	M-H	140.012	219.9	3.4	1.39	1.46	1.33	3.26	1.79	1.73	0	6.29	0.6	219.7	221	219.7	218.5	219.7	219.7	219.7	219.7	219.7	219.7	0.97	0.92	0.96	0.95	0.96	0.97	0.96	0.88	0.96	0.97	0.72	0.45	0.66	0.41	0.79	0.84	0.72	0	0.97	0.66
118	PE(16:0/9-HODE) C39H74NO9P	MS1	M-H2O-H	712.494	218.53	782.98	815.71	782.91	773.49	1474.46	817.56	736.32	158.09	1985.43	669.73	219.7	221	219.7	218.5	219.7	219.7	219.7	219.7	219.7	219.7	0.7	0.75	0.81	0.78	0.82	0.69	0.72	0.87	0.74	0.78	0.61	0.81	0.78	0.7	0.73	0.6	0.61	0.82	0.61	0.7
118	PE(16:0/9-HODE) C39H74NO9P	MS2	M-H2O-H	61.9878	218.53	7.73	8.82	15.81	22.82	24.08	6.64	9.99	8.11	11.6	10.85	219.7	221	219.7	218.5	219.7	219.7	219.7	219.7	219.7	219.7	0.7	0.75	0.81	0.78	0.82	0.69	0.72	0.87	0.74	0.78	0.59	0.52	0.52	0.83	0.65	0.6	0.61	0.61	0.59	0.66
118	PE(16:0/9-HODE) C39H74NO9P	MS2	M-H2O-H	279.232	218.53	116.88	107.97	99.55	67.56	144.56	120.34	104.34	14.44	272.1	92.31	219.7	221	219.7	218.5	219.7	219.7	219.7	219.7	219.7	219.7	0.7	0.75	0.81	0.78	0.82	0.69	0.72	0.87	0.74	0.78	0.82	0.81	0.81	0.7	0.86	0.89	0.83	0.88	0.94	0.88
118	PE(16:0/9-HODE) C39H74NO9P	MS2	M-H2O-H	255.237	218.53	17.35	41.84	23.82	28.28	49.64	22.68	16.82	10.71	44.87	24.58	219.7	221	219.7	218.5	219.7	219.7	219.7	219.7	219.7	219.7	0.7	0.75	0.81	0.78	0.82	0.69	0.72	0.87	0.74	0.78	0.61	0.84	0.78	0.59	0.73	0.6	0.61	0.82	0.61	0.7
119	Cer-NP t42:0; Cer-NP t18:0/24:0; [M-H]- C42H85NO4	MS1	M+HCOO	712.644	320.89	74.64	66.6	67.15	101.16	94.77	69.49		52.11	109.73	62.21	319.8	321	319.8	319.8	321	321		321	319.8	319.8	0.9	0.87	0.77	0.82	0.94	0.8		0.74	0.96	0.73	0.76	0.79	0.59	0.74	0.91	0.63		0.69	0.83	0.67
119	Cer-NP t42:0; Cer-NP t18:0/24:0; [M-H]- C42H85NO4	MS2	M+HCOO	666.635	320.89	11.56	8.9	11.84	15.46	14.84	7.06		11.12	18.53	10.39	319.8	321	319.8	319.8	321	321		321	319.8	319.8	0.9	0.87	0.77	0.82	0.94	0.8		0.74	0.96	0.73	0.92	0.95	0.74	0.83	0.92	0.84		0.69	0.93	0.72
119	Cer-NP t42:0; Cer-NP t18:0/24:0; [M-H]- C42H85NO4	MS2	M+HCOO	410.397	320.89	1.37	1.83	0.23	0	3.64	0		0	3.41	0	319.8	321	319.8	319.8	321	321		321	319.8	319.8	0.9	0.87	0.77	0.82	0.94	0.8		0.74	0.96	0.73	0.66	0.79	0.59	0	0.91	0		0	0.83	0
119	Cer-NP t42:0; Cer-NP t18:0/24:0; [M-H]- C42H85NO4	MS2	M+HCOO	408.383	320.89	0	0	0	0	0.23	0.68		0	2.05	0	319.8	321	319.8	319.8	321	321		321	319.8	319.8	0.9	0.87	0.77	0.82	0.94	0.8		0.74	0.96	0.73	0	0	0	0	0.65	0.63		0	0.64	0
119	Cer-NP t42:0; Cer-NP t18:0/24:0; [M-H]- C42H85NO4	MS2	M+HCOO	367.358	320.89	1.73	1.52	0	0.87	0.32	0		0.43	0.87	0	319.8	321	319.8	319.8	321	321		321	319.8	319.8	0.9	0.87	0.77	0.82	0.94	0.8		0.74	0.96	0.73	0.76	0.43	0	0.65	0.65	0		0.69	0.79	0
119	Cer-NP t42:0; Cer-NP t18:0/24:0; [M-H]- C42H85NO4	MS2	M+HCOO	630.617	320.89	0	0	0	1.42	0.28	0		0	0	0	319.8	321	319.8	319.8	321	321		321	319.8	319.8	0.9	0.87	0.77	0.82	0.94	0.8		0.74	0.96	0.73	0	0	0	0.58	0.49	0		0	0	0
119	Cer-NP t42:0; Cer-NP t18:0/24:0; [M-H]- C42H85NO4	MS2	M+HCOO	422.401	320.89	0.46	0.46	0	1.97	2.41	0.7		0	1.61	0.81	319.8	321	319.8	319.8	321	321		321	319.8	319.8	0.9	0.87	0.77	0.82	0.94	0.8		0.74	0.96	0.73	0.61	0.43	0	0.74	0.7	0.63		0	0.73	0.67
120	PE 34:1; PE 16:0-18:1; [M-H]- C39H76NO8P	MS1	M-H	716.523	250.31	1520.32	1643.72	1118.4	1670.87	1655.93	1909.5	1899.52	620.26	3624.27	1365.72	250.3	250.2	250.3	250.3	250.3	250.3	250.3	250.3	250.3	250.3	0.97	0.97	0.98	0.98	0.98	0.96	0.96	0.97	0.96	0.97	0.97	0.95	0.87	0.9	0.92	0.93	0.9	0.93	0.96	0.92
120	PE 34:1; PE 16:0-18:1; [M-H]- C39H76NO8P	MS2	M-H	281.248	250.31	276.63	282.57	207.77	341.53	276.74	320.06	406.45	99.3	733.49	276.58	250.3	250.2	250.3	250.3	250.3	250.3	250.3	250.3	250.3	250.3	0.97	0.97	0.98	0.98	0.98	0.96	0.96	0.97	0.96	0.97	0.96	0.93	0.87	0.89	0.88	0.94	0.9	0.94	0.96	0.92
120	PE 34:1; PE 16:0-18:1; [M-H]- C39H76NO8P	MS2	M-H	255.232	250.31	124.94	127.37	100.6	132.51	133.11	128.52	147.1	48.14	275.11	126.71	250.3	250.2	250.3	250.3	250.3	250.3	250.3	250.3	250.3	250.3	0.97	0.97	0.98	0.98	0.98	0.96	0.96	0.97	0.96	0.97	0.97	0.95	0.83	0.9	0.85	0.92	0.86	0.93	0.95	0.86
120	PE 34:1; PE 16:0-18:1; [M-H]- C39H76NO8P	MS2	M-H	716.524	250.31	131.97	162.77	102.77	157.3	143.82	181.32	216.73	54.52	383.98	146.2	250.3	250.2	250.3	250.3	250.3	250.3	250.3	250.3	250.3	250.3	0.97	0.97	0.98	0.98	0.98	0.96	0.96	0.97	0.96	0.97	0.94	0.97	0.87	0.85	0.86	0.93	0.88	0.93	0.96	0.89
120	PE 34:1; PE 16:0-18:1; [M-H]- C39H76NO8P	MS2	M-H	253.216	250.31	16.09	16.27	14.6	13.8	12.05	6.58	8.47	5.43	17.3	12.4	250.3	250.2	250.3	250.3	250.3	250.3	250.3	250.3	250.3	250.3	0.97	0.97	0.98	0.98	0.98	0.96	0.96	0.97	0.96	0.97	0.98	0.88	0.86	0.87	0.97	0.9	0.94	0.85	0.9	0.98
120	PE 34:1; PE 16:0-18:1; [M-H]- C39H76NO8P	MS2	M-H	283.263	250.31	14.2	10.17	10.44	16.26	14.33	8.93	11.31	3.3	18.94	11.67	250.3	250.2	250.3	250.3	250.3	250.3	250.3	250.3	250.3	250.3	0.97	0.97	0.98	0.98	0.98	0.96	0.96	0.97	0.96	0.97	0.97	0.92	0.94	0.97	0.92	0.91	0.84	0.74	0.97	0.92
120	PE 34:1; PE 16:0-18:1; [M-H]- C39H76NO8P	MS2	M-H	452.277	250.31	11.77	13.22	8.44	14.18	10.58	20.21	10.94	2.87	35.03	11.18	250.3	250.2	250.3	250.3	250.3	250.3	250.3	250.3	250.3	250.3	0.97	0.97	0.98	0.98	0.98	0.96	0.96	0.97	0.96	0.97	0.92	0.9	0.72	0.87	0.89	0.93	0.83	0.85	0.95	0.86
121	PC 31:0; PC 15:0-16:0; [M+FA-H]- C39H78NO8P---PE 34:0; [M-H]-; GPEtn(16:0/18:0) C39H78NO8P---PE 34:0; [M-H]-; GPEtn(18:0/16:0) C39H78NO8P	MS1	M-H	718.538	240.17					54.01										240.5										0.98										0.68
121	PC 31:0; PC 15:0-16:0; [M+FA-H]- C39H78NO8P---PE 34:0; [M-H]-; GPEtn(16:0/18:0) C39H78NO8P---PE 34:0; [M-H]-; GPEtn(18:0/16:0) C39H78NO8P	MS2	M-H	255.231	240.17					118.83										240.5										0.98										0.35
121	PC 31:0; PC 15:0-16:0; [M+FA-H]- C39H78NO8P---PE 34:0; [M-H]-; GPEtn(16:0/18:0) C39H78NO8P---PE 34:0; [M-H]-; GPEtn(18:0/16:0) C39H78NO8P	MS2	M-H	718.539	240.17					6.29										240.5										0.98										0.9
121	PC 31:0; PC 15:0-16:0; [M+FA-H]- C39H78NO8P---PE 34:0; [M-H]-; GPEtn(16:0/18:0) C39H78NO8P---PE 34:0; [M-H]-; GPEtn(18:0/16:0) C39H78NO8P	MS2	M-H	480.307	240.17					1.49										240.5										0.98										0.68
121	PC 31:0; PC 15:0-16:0; [M+FA-H]- C39H78NO8P---PE 34:0; [M-H]-; GPEtn(16:0/18:0) C39H78NO8P---PE 34:0; [M-H]-; GPEtn(18:0/16:0) C39H78NO8P	MS2	M-H	462.297	240.17					0										240.5										0.98										0
122	PE 34:0; PE 16:0-18:0; [M-H]- C39H78NO8P	MS1	M-H	718.539	267.04	53	32.37	33.36	40.3	47.28	14.94	17.41	81.57	46.12	41.47	267.3	267.3	266.1	267.3	267.3	266.1	267.3	267.3	267.3	267.3	0.96	0.93	0.98	0.95	0.97	0.91	0.9	0.95	0.95	0.93	0.74	0.89	0.69	0.6	0.81	0.69	0.81	0.89	0.82	0.71
122	PE 34:0; PE 16:0-18:0; [M-H]- C39H78NO8P	MS2	M-H	255.232	267.04	10.94	11.98	15.54	12.94	13.51	8.27	4.47	14.29	10.71	7.73	267.3	267.3	266.1	267.3	267.3	266.1	267.3	267.3	267.3	267.3	0.96	0.93	0.98	0.95	0.97	0.91	0.9	0.95	0.95	0.93	0.7	0.8	0.79	0.76	0.81	0.77	0.81	0.84	0.83	0.71
122	PE 34:0; PE 16:0-18:0; [M-H]- C39H78NO8P	MS2	M-H	283.265	267.04	3.88	4.14	3.98	2.73	5.47	1.71	2.83	5	5.18	3.29	267.3	267.3	266.1	267.3	267.3	266.1	267.3	267.3	267.3	267.3	0.96	0.93	0.98	0.95	0.97	0.91	0.9	0.95	0.95	0.93	0.85	0.89	0.69	0.5	0.92	0.69	0.97	0.91	0.82	0.73
122	PE 34:0; PE 16:0-18:0; [M-H]- C39H78NO8P	MS2	M-H	718.538	267.04	2.1	6.16	1.51	2.25	4.19	2.56	0	8.85	5.27	1.82	267.3	267.3	266.1	267.3	267.3	266.1	267.3	267.3	267.3	267.3	0.96	0.93	0.98	0.95	0.97	0.91	0.9	0.95	0.95	0.93	0.34	0.93	0.41	0.6	0.52	0.66	0	0.89	0.55	0.42
122	PE 34:0; PE 16:0-18:0; [M-H]- C39H78NO8P	MS2	M-H	480.318	267.04	0.74	0	0	0	0	0	0	0	0.99	0	267.3	267.3	266.1	267.3	267.3	266.1	267.3	267.3	267.3	267.3	0.96	0.93	0.98	0.95	0.97	0.91	0.9	0.95	0.95	0.93	0.74	0	0	0	0	0	0	0	0.61	0
122	PE 34:0; PE 16:0-18:0; [M-H]- C39H78NO8P	MS2	M-H	452.282	267.04	0	0	0	0	0	0	0	0	0	0	267.3	267.3	266.1	267.3	267.3	266.1	267.3	267.3	267.3	267.3	0.96	0.93	0.98	0.95	0.97	0.91	0.9	0.95	0.95	0.93	0	0	0	0	0	0	0	0	0	0
123	SM d32:1; SM d14:0/18:1; [M+FA-H]- C37H75N2O6P	MS1	M+HCOO	719.534	198.14	23.13		29.5		27.69		10.02	17.19	42.79		197.8		197.8		197.8		198.1	198.1	197.8		0.99		0.99		0.99		0.99	0.98	0.99		0.63		0.66		0.7		0.79	0.63	0.71
123	SM d32:1; SM d14:0/18:1; [M+FA-H]- C37H75N2O6P	MS2	M+HCOO	659.513	198.14	6.59		10.64		10.79		6.16	3.77	16.94		197.8		197.8		197.8		198.1	198.1	197.8		0.99		0.99		0.99		0.99	0.98	0.99		0.68		0.88		0.87		0.79	0.82	0.89
123	SM d32:1; SM d14:0/18:1; [M+FA-H]- C37H75N2O6P	MS2	M+HCOO	168.043	198.14	0.29		0.51		0.51		0.88	0.29	1.82		197.8		197.8		197.8		198.1	198.1	197.8		0.99		0.99		0.99		0.99	0.98	0.99		0.63		0.66		0.7		0.86	0.63	0.71
123	SM d32:1; SM d14:0/18:1; [M+FA-H]- C37H75N2O6P	MS2	M+HCOO	78.9582	198.14	0		0		0		0	0	0		197.8		197.8		197.8		198.1	198.1	197.8		0.99		0.99		0.99		0.99	0.98	0.99		0		0		0		0	0	0
124	Cer-AS d43:3; Cer-AS d19:3/24:0; [M-H]- C43H81NO4	MS1	M+HCOO	720.614	312.42				51.66	57.54				47.92	34.17				312.5	312.5				312.5	312.5				0.88	0.97				0.87	0.97				0.7	0.6				0.64	0.57
124	Cer-AS d43:3; Cer-AS d19:3/24:0; [M-H]- C43H81NO4	MS2	M+HCOO	674.612	312.42				0.59	3.94				7.12	0.88				312.5	312.5				312.5	312.5				0.88	0.97				0.87	0.97				0.7	0.68				0.64	0.32
124	Cer-AS d43:3; Cer-AS d19:3/24:0; [M-H]- C43H81NO4	MS2	M+HCOO	682.626	312.42				0.3	1.77				0	0.29				312.5	312.5				312.5	312.5				0.88	0.97				0.87	0.97				0.38	0.37				0	0.64
124	Cer-AS d43:3; Cer-AS d19:3/24:0; [M-H]- C43H81NO4	MS2	M+HCOO	383.355	312.42				0	0				0	0				312.5	312.5				312.5	312.5				0.88	0.97				0.87	0.97				0	0				0	0
124	Cer-AS d43:3; Cer-AS d19:3/24:0; [M-H]- C43H81NO4	MS2	M+HCOO	72.9936	312.42				1.49	0.29				0.29	0.19				312.5	312.5				312.5	312.5				0.88	0.97				0.87	0.97				0.86	0.6				0.81	0.57
125	1,2-Dipalmitoyl-sn-glycero-3-phospho-(1'-rac-glycerol) [M-H]- C38H75O10P NIST 1149513---PG 32:0; PG 16:0-16:0; [M-H]- C38H75O10P	MS1	M-H	721.499	219.43								35.65										218.5										0.7										0.71
125	1,2-Dipalmitoyl-sn-glycero-3-phospho-(1'-rac-glycerol) [M-H]- C38H75O10P NIST 1149513---PG 32:0; PG 16:0-16:0; [M-H]- C38H75O10P	MS2	M-H	255.234	219.43								5.99										218.5										0.7										0.94
125	1,2-Dipalmitoyl-sn-glycero-3-phospho-(1'-rac-glycerol) [M-H]- C38H75O10P NIST 1149513---PG 32:0; PG 16:0-16:0; [M-H]- C38H75O10P	MS2	M-H	721.514	219.43								0										218.5										0.7										0
125	1,2-Dipalmitoyl-sn-glycero-3-phospho-(1'-rac-glycerol) [M-H]- C38H75O10P NIST 1149513---PG 32:0; PG 16:0-16:0; [M-H]- C38H75O10P	MS2	M-H	721.47	219.43								0										218.5										0.7										0
125	1,2-Dipalmitoyl-sn-glycero-3-phospho-(1'-rac-glycerol) [M-H]- C38H75O10P NIST 1149513---PG 32:0; PG 16:0-16:0; [M-H]- C38H75O10P	MS2	M-H	483.268	219.43								0										218.5										0.7										0
125	1,2-Dipalmitoyl-sn-glycero-3-phospho-(1'-rac-glycerol) [M-H]- C38H75O10P NIST 1149513---PG 32:0; PG 16:0-16:0; [M-H]- C38H75O10P	MS2	M-H	61.9883	219.43								3.44										218.5										0.7										0.71
125	1,2-Dipalmitoyl-sn-glycero-3-phospho-(1'-rac-glycerol) [M-H]- C38H75O10P NIST 1149513---PG 32:0; PG 16:0-16:0; [M-H]- C38H75O10P	MS2	M-H	139.008	219.43								3.7										218.5										0.7										0.65
126	plasmenyl-PE 36:4; [M-H]-; PE(P-16:0/20:4(5E,8E,11E,14E)) C41H74NO7P---plasmenyl-PE 36:4; [M-H]-; PE(P-16:0/20:4(5Z,8Z,11Z,14Z)) C41H74NO7P---plasmenyl-PE 36:4; [M-H]-; PE(P-16:0/20:4(7E,10E,13E,16E)) C41H74NO7P	MS1	M-H	722.513	244.12	2730.76	1189.15	1464.28	1752.82	1639.35	1461.39	1086.53	790.2	3456.03	1315.37	244.2	244.1	244.2	244.2	244.2	244.2	244.2	244.2	244.2	244.2	0.99	0.99	0.99	0.99	0.99	0.99	0.99	0.98	0.99	0.99	0.82	0.9	0.92	0.96	0.97	0.94	0.93	0.95	0.94	0.96
126	plasmenyl-PE 36:4; [M-H]-; PE(P-16:0/20:4(5E,8E,11E,14E)) C41H74NO7P---plasmenyl-PE 36:4; [M-H]-; PE(P-16:0/20:4(5Z,8Z,11Z,14Z)) C41H74NO7P---plasmenyl-PE 36:4; [M-H]-; PE(P-16:0/20:4(7E,10E,13E,16E)) C41H74NO7P	MS2	M-H	303.233	244.12	411.34	165.83	274.37	265.14	242	216.81	175.4	82.92	519.14	200.12	244.2	244.1	244.2	244.2	244.2	244.2	244.2	244.2	244.2	244.2	0.99	0.99	0.99	0.99	0.99	0.99	0.99	0.98	0.99	0.99	0.82	0.9	0.92	0.95	0.97	0.94	0.91	0.95	0.92	0.96
126	plasmenyl-PE 36:4; [M-H]-; PE(P-16:0/20:4(5E,8E,11E,14E)) C41H74NO7P---plasmenyl-PE 36:4; [M-H]-; PE(P-16:0/20:4(5Z,8Z,11Z,14Z)) C41H74NO7P---plasmenyl-PE 36:4; [M-H]-; PE(P-16:0/20:4(7E,10E,13E,16E)) C41H74NO7P	MS2	M-H	722.515	244.12	188.26	59.66	106.57	108.87	80.99	97.2	79.04	42.59	226.82	66.37	244.2	244.1	244.2	244.2	244.2	244.2	244.2	244.2	244.2	244.2	0.99	0.99	0.99	0.99	0.99	0.99	0.99	0.98	0.99	0.99	0.82	0.92	0.93	0.94	0.94	0.9	0.94	0.95	0.94	0.9
126	plasmenyl-PE 36:4; [M-H]-; PE(P-16:0/20:4(5E,8E,11E,14E)) C41H74NO7P---plasmenyl-PE 36:4; [M-H]-; PE(P-16:0/20:4(5Z,8Z,11Z,14Z)) C41H74NO7P---plasmenyl-PE 36:4; [M-H]-; PE(P-16:0/20:4(7E,10E,13E,16E)) C41H74NO7P	MS2	M-H	436.283	244.12	83.46	22.81	46.83	41.4	43.32	39.32	31.36	18.71	111.71	30	244.2	244.1	244.2	244.2	244.2	244.2	244.2	244.2	244.2	244.2	0.99	0.99	0.99	0.99	0.99	0.99	0.99	0.98	0.99	0.99	0.82	0.87	0.9	0.97	0.93	0.94	0.93	0.78	0.96	0.96
126	plasmenyl-PE 36:4; [M-H]-; PE(P-16:0/20:4(5E,8E,11E,14E)) C41H74NO7P---plasmenyl-PE 36:4; [M-H]-; PE(P-16:0/20:4(5Z,8Z,11Z,14Z)) C41H74NO7P---plasmenyl-PE 36:4; [M-H]-; PE(P-16:0/20:4(7E,10E,13E,16E)) C41H74NO7P	MS2	M-H	259.242	244.12	25.77	7.36	19.72	21.17	14.93	16.73	6.95	5.23	38.05	12.46	244.2	244.1	244.2	244.2	244.2	244.2	244.2	244.2	244.2	244.2	0.99	0.99	0.99	0.99	0.99	0.99	0.99	0.98	0.99	0.99	0.83	0.84	0.76	0.96	0.98	0.94	0.89	0.93	0.94	0.86
126	plasmenyl-PE 36:4; [M-H]-; PE(P-16:0/20:4(5E,8E,11E,14E)) C41H74NO7P---plasmenyl-PE 36:4; [M-H]-; PE(P-16:0/20:4(5Z,8Z,11Z,14Z)) C41H74NO7P---plasmenyl-PE 36:4; [M-H]-; PE(P-16:0/20:4(7E,10E,13E,16E)) C41H74NO7P	MS2	M-H	418.274	244.12	26.74	11.45	14.09	11.65	14.16	12.95	10.07	7.2	35.18	10.92	244.2	244.1	244.2	244.2	244.2	244.2	244.2	244.2	244.2	244.2	0.99	0.99	0.99	0.99	0.99	0.99	0.99	0.98	0.99	0.99	0.7	0.87	0.86	0.94	0.91	0.9	0.86	0.93	0.93	0.87
126	plasmenyl-PE 36:4; [M-H]-; PE(P-16:0/20:4(5E,8E,11E,14E)) C41H74NO7P---plasmenyl-PE 36:4; [M-H]-; PE(P-16:0/20:4(5Z,8Z,11Z,14Z)) C41H74NO7P---plasmenyl-PE 36:4; [M-H]-; PE(P-16:0/20:4(7E,10E,13E,16E)) C41H74NO7P	MS2	M-H	196.038	244.12	13.93	5.79	6.02	8.31	7.48	7.12	7.22	2.08	14.96	6.81	244.2	244.1	244.2	244.2	244.2	244.2	244.2	244.2	244.2	244.2	0.99	0.99	0.99	0.99	0.99	0.99	0.99	0.98	0.99	0.99	0.81	0.5	0.63	0.74	0.92	0.72	0.53	0.82	0.79	0.88
[truncated: 2,689 more rows]

## Sheet: MetaboKit-Pos-Aqu
group	compound	Quantification Mode	adduct	mass	RT(library)	KO1	KO2	KO3	KO4	KO5	WT1	WT2	WT3	WT4	WT5	RT_KO1	RT_KO2	RT_KO3	RT_KO4	RT_KO5	RT_WT1	RT_WT2	RT_WT3	RT_WT4	RT_WT5	DOTP_KO1	DOTP_KO2	DOTP_KO3	DOTP_KO4	DOTP_KO5	DOTP_WT1	DOTP_WT2	DOTP_WT3	DOTP_WT4	DOTP_WT5	COR_KO1	COR_KO2	COR_KO3	COR_KO4	COR_KO5	COR_WT1	COR_WT2	COR_WT3	COR_WT4	COR_WT5
[truncated: 1,754 more rows]

[truncated: 7 more sheets: MetaboKit-Pos-Org, MS1_mapDIA, MS2_mapDIA, MSDIAL-Neg-Aqu, MSDIAL-Neg-Org, MSDIAL-Pos-Aqu, MSDIAL-Pos-Org]
